# Supplementary material for: Identification of Insulin-Responsive Transcription Factors That Regulate Glucose Production by Hepatocytes
Source: Oxford University Press journal article supplement (doi:10.2337/db18-1236), 2019-04-01
Supplement: db181236supplementarydata2.xlsx [file db181236supplementarydata2.xlsx]

## Sheet: Pck1p #1 total
							iBAQ				# PSM
Accession	Gene name	Gene annotation	Description	Σ# Unique Peptides	Σ# Peptides	Σ# PSMs	90057	90058	90059	90060	90057	90058	90059	90060
31982300	HBB-B1	NOT_in_TF_list	hemoglobin, beta adult t chain [Mus musculus]	4	14	80	4.13371e+07	2.2131e+06	3.66524e+08	1.61219e+08	12	2	31	35
114145561	KRT8	NOT_in_TF_list	keratin, type II cytoskeletal 8 [Mus musculus]	51	64	504	3.04575e+08	9.05608e+08	3.90626e+08	2.06512e+09	30	149	79	246
261244915	KRTAP5-3	NOT_in_TF_list	keratin-associated protein 5-3 [Mus musculus]	9	9	23	0	0	0	0	23	0	0	0
254540068	KRT18	NOT_in_TF_list	keratin, type I cytoskeletal 18 [Mus musculus]	43	47	363	6.27931e+08	1.72294e+09	1.83351e+09	4.5563e+09	19	117	37	190
145301549	HBA-A2	NOT_in_TF_list	hemoglobin alpha, adult chain 2 [Mus musculus]	9	9	44	1.73803e+07	0	2.48625e+08	1.10269e+08	13	0	16	15
6671509	ACTB	NOT_in_TF_list	actin, cytoplasmic 1 [Mus musculus]	1	48	1426	4.31982e+07	78772157711	9.83103e+08	6.82243e+10	22	636	83	685
6752954	ACTG1	NOT_in_TF_list	actin, cytoplasmic 2 [Mus musculus]	1	48	1430	4.31982e+07	78772157711	9.83103e+08	6.82243e+10	22	639	82	687
251823978	PCX	NOT_in_TF_list	pyruvate carboxylase, mitochondrial isoform 2 [Mus musculus]	108	109	1711	3.99956e+06	1.33964e+10	2.52742e+09	2.44392e+10	13	589	281	828
498752597	MisMatch	NOT_in_TF_list	hemoglobin subunit beta-1 [Mus musculus]	1	11	59	3.83668e+07	0	2.99695e+08	1.4843e+08	9	0	24	26
27753952	RBM7	NOT_in_TF_list	RNA-binding protein 7 [Mus musculus]	16	16	27	6.41903e+07	0	339483	0	26	0	1	0
170172520	DBT	NOT_in_TF_list	lipoamide acyltransferase component of branched-chain alpha-keto acid dehydrogenase complex, mitochondrial [Mus musculus]	48	48	556	993559	3.84253e+09	8.21448e+07	3.93049e+09	1	246	33	276
186700620	MCCC1	NOT_in_TF_list	methylcrotonoyl-CoA carboxylase subunit alpha, mitochondrial [Mus musculus]	52	52	640	1.17022e+06	1.38994e+08	2.123e+09	3.66533e+08	1	69	437	133
228480255	42980	NOT_in_TF_list	septin-2 isoform a [Mus musculus]	3	22	107	0	3.69139e+08	2.58804e+06	4.44824e+08	0	42	3	62
364502999	MisMatch	NOT_in_TF_list	keratin-associated protein 5-2 [Mus musculus]	13	14	104	0	0	0	0	87	0	17	0
11230802	ACTN4	NOT_in_TF_list	alpha-actinin-4 [Mus musculus]	42	64	309	767177	2.92525e+08	2.51012e+07	3.19031e+08	1	128	37	143
228480253	42980	NOT_in_TF_list	septin-2 isoform b [Mus musculus]	1	20	95	0	3.63978e+08	3.4885e+06	4.43094e+08	0	36	2	57
6755919	UBB	NOT_in_TF_list	polyubiquitin-B [Mus musculus]	8	8	36	1.94778e+07	7.53094e+07	5.10209e+07	2.49069e+08	4	5	5	22
6677805	RPS4X	NOT_in_TF_list	40S ribosomal protein S4, X isoform [Mus musculus]	24	24	93	3.22965e+08	0	1.43559e+08	1.66489e+06	54	0	37	2
6755372	RPS3	NOT_in_TF_list	40S ribosomal protein S3 [Mus musculus]	18	18	63	1.71988e+07	4.95461e+06	1.48936e+08	8.04427e+06	13	6	39	5
418203916	MisMatch	NOT_in_TF_list	tropomyosin alpha-3 chain isoform 5 [Mus musculus]	9	27	138	5.46891e+07	6.65703e+07	1.48199e+09	3.21204e+08	19	11	74	34
61097906	ACTN1	NOT_in_TF_list	alpha-actinin-1 [Mus musculus]	38	60	241	767177	2.92525e+08	2.51012e+07	3.19031e+08	1	97	32	111
254540162	PCCA	NOT_in_TF_list	propionyl-CoA carboxylase alpha chain, mitochondrial precursor [Mus musculus]	56	56	460	0	8.08881e+07	1.99992e+09	1.96769e+08	0	54	286	120
6671672	CAPZA2	NOT_in_TF_list	F-actin-capping protein subunit alpha-2 [Mus musculus]	10	13	49	0	5.68885e+06	5.24094e+06	4.85376e+08	0	2	6	41
262231776	BAIAP2	NOT_in_TF_list	brain-specific angiogenesis inhibitor 1-associated protein 2 isoform a [Mus musculus]	36	36	128	0	6.44636e+07	4.84743e+07	1.00366e+08	0	39	38	51
256000784	TPM1	NOT_in_TF_list	tropomyosin alpha-1 chain isoform 4 [Mus musculus]	6	31	146	5.13059e+07	6.45846e+07	1.5405e+09	3.23594e+08	15	9	70	52
114326446	MYH9	NOT_in_TF_list	myosin-9 isoform 1 [Mus musculus]	163	190	2270	3.15937e+08	9.61466e+08	4.69775e+08	9.80578e+09	256	311	203	1500
86990450	MYO1B	NOT_in_TF_list	unconventional myosin-Ib isoform 2 [Mus musculus]	87	88	567	2.30252e+06	2.11488e+09	1.18816e+08	1.55558e+09	4	246	71	246
6754220	HNRNPA1	NOT_in_TF_list	heterogeneous nuclear ribonucleoprotein A1 isoform a [Mus musculus]	20	25	166	7.49478e+08	0	4.4578e+07	2.13355e+08	96	0	25	45
118026911	MYO1D	NOT_in_TF_list	unconventional myosin-Id [Mus musculus]	79	79	365	0	4.5646e+08	1.09315e+08	3.27777e+08	0	170	40	155
31541815	EHHADH	NOT_in_TF_list	peroxisomal bifunctional enzyme [Mus musculus]	51	51	275	1.62191e+07	2.31214e+07	7.54357e+08	4.74919e+07	38	27	169	41
256000788	TPM1	NOT_in_TF_list	tropomyosin alpha-1 chain isoform 6 [Mus musculus]	0	26	128	6.20609e+07	6.77027e+07	1.6406e+09	3.23594e+08	17	13	67	31
6679573	PURA	NOT_in_TF_list	transcriptional activator protein Pur-alpha [Mus musculus]	16	19	51	0	2.38121e+08	1.06256e+07	8.40198e+08	0	13	5	33
13385310	PCCB	NOT_in_TF_list	propionyl-CoA carboxylase beta chain, mitochondrial precursor [Mus musculus]	34	34	350	0	7.99631e+08	2.2836e+08	1.84099e+09	0	94	67	189
363543357	MisMatch	NOT_in_TF_list	predicted gene 7055 [Mus musculus]	4	4	9	0	0	0	0	7	0	2	0
157951596	CAR2	NOT_in_TF_list	carbonic anhydrase 2 [Mus musculus]	12	12	19	1.8869e+06	0	5.88315e+07	1.17516e+06	1	0	17	1
6679299	PHB	NOT_in_TF_list	prohibitin [Mus musculus]	14	14	15	0	0	2.88334e+07	0	0	0	15	0
309267107	LOC100045191	NOT_in_TF_list	PREDICTED: heterogeneous nuclear ribonucleoproteins A2/B1-like isoform 1 [Mus musculus]	18	23	122	4.00882e+08	0	5.38514e+07	4.6495e+08	42	0	23	57
256000792	TPM1	NOT_in_TF_list	tropomyosin alpha-1 chain isoform 8 [Mus musculus]	0	25	124	6.20609e+07	6.77027e+07	1.6406e+09	3.23594e+08	16	13	65	30
161086971	CAPZA1	NOT_in_TF_list	F-actin-capping protein subunit alpha-1 [Mus musculus]	10	13	40	0	5.68885e+06	4.2411e+06	3.40161e+08	0	2	4	34
31560030	TPM1	NOT_in_TF_list	tropomyosin alpha-1 chain isoform 3 [Mus musculus]	0	27	120	5.13059e+07	5.71728e+07	1.51005e+09	3.23594e+08	12	9	55	44
31980648	ATP5B	NOT_in_TF_list	ATP synthase subunit beta, mitochondrial precursor [Mus musculus]	24	24	151	2.17612e+06	1.4327e+08	5.92593e+06	2.06239e+08	4	59	5	83
20806109	PARP1	NOT_in_TF_list	poly [ADP-ribose] polymerase 1 [Mus musculus]	79	79	597	0	1.34596e+09	1.0142e+08	1.18223e+09	0	250	76	271
256000780	TPM1	NOT_in_TF_list	tropomyosin alpha-1 chain isoform 1 [Mus musculus]	0	26	116	5.13059e+07	5.71728e+07	1.51005e+09	3.23594e+08	11	9	53	43
73622267	MCCC2	NOT_in_TF_list	methylcrotonoyl-CoA carboxylase beta chain, mitochondrial [Mus musculus]	32	32	232	0	1.58588e+08	4.86817e+08	6.65355e+08	0	42	96	94
118601009	PNKP	NOT_in_TF_list	bifunctional polynucleotide phosphatase/kinase [Mus musculus]	37	37	177	0	5.0223e+07	5.31545e+08	2.16349e+08	0	27	95	55
33598964	MYH10	NOT_in_TF_list	myosin-10 [Mus musculus]	104	131	645	1.59403e+08	4.87194e+08	1.81026e+08	6.37507e+09	68	91	58	428
116517303	PTBP1	NOT_in_TF_list	polypyrimidine tract-binding protein 1 isoform 2 [Mus musculus]	22	26	248	2.71094e+08	2.19796e+08	1.05662e+08	4.07698e+08	88	56	32	72
22094119	MYO18A	NOT_in_TF_list	unconventional myosin-XVIIIa [Mus musculus]	132	132	648	5.73526e+07	1.79612e+08	8.12859e+07	1.02434e+09	61	123	41	423
149251501	LOC100044829	NOT_in_TF_list	PREDICTED: rRNA 2'-O-methyltransferase fibrillarin-like isoform 1 [Mus musculus]	15	15	72	0	1.70185e+07	9.51019e+07	3.39819e+08	0	11	13	48
247269309	CMAS	NOT_in_TF_list	N-acylneuraminate cytidylyltransferase [Mus musculus]	30	30	167	0	6.15315e+08	1.06581e+07	8.10775e+08	0	69	13	85
33620739	MYL6	NOT_in_TF_list	myosin light polypeptide 6 [Mus musculus]	9	10	33	1.51256e+06	2.62433e+07	1.30341e+08	4.30389e+07	2	6	15	10
158186704	HNRNPM	NOT_in_TF_list	heterogeneous nuclear ribonucleoprotein M isoform b [Mus musculus]	42	42	191	2.024e+08	5.21851e+06	1.00709e+08	1.39471e+08	68	10	96	17
439253893	MisMatch	NOT_in_TF_list	actin, alpha skeletal muscle [Mus musculus]	4	36	872	2.86527e+07	75218734351	7.57056e+08	5.39333e+10	11	388	37	436
61888838	HSD17B10	NOT_in_TF_list	3-hydroxyacyl-CoA dehydrogenase type-2 [Mus musculus]	12	12	43	2.56053e+06	2.14467e+06	1.44864e+08	0	4	2	35	2
126090932	NOP56	NOT_in_TF_list	nucleolar protein 56 [Mus musculus]	34	34	147	333013	5.99901e+07	7.76247e+08	3.57412e+07	1	20	99	27
309269022	GM4553	NOT_in_TF_list	PREDICTED: uncharacterized protein LOC100043617 [Mus musculus]	8	9	67	0	0	0	0	62	0	4	1
40254525	TPM3	NOT_in_TF_list	tropomyosin alpha-3 chain isoform 1 [Mus musculus]	4	26	126	4.92507e+07	6.23626e+07	1.48199e+09	3.21204e+08	16	9	67	34
6753086	APEX1	NOT_in_TF_list	DNA-(apurinic or apyrimidinic site) lyase [Mus musculus]	15	15	31	0	0	7.03466e+06	3.17206e+08	0	0	6	25
124494242	MYO1C	NOT_in_TF_list	unconventional myosin-Ic isoform a [Mus musculus]	2	66	333	0	9.50427e+08	4.0975e+07	6.8157e+08	0	150	48	135
183396774	BCKDHA	NOT_in_TF_list	2-oxoisovalerate dehydrogenase subunit alpha, mitochondrial [Mus musculus]	20	20	46	0	5.53245e+07	1.08615e+06	6.09958e+07	0	18	1	27
124494244	MYO1C	NOT_in_TF_list	unconventional myosin-Ic isoform b [Mus musculus]	1	65	326	0	9.50427e+08	4.0975e+07	6.8157e+08	0	148	46	132
162287370	LMNA	NOT_in_TF_list	prelamin-A/C isoform A precursor [Mus musculus]	41	41	104	494792	2.10121e+07	1.56996e+08	8.55097e+07	2	10	71	21
258679524	LRRFIP2	NOT_in_TF_list	leucine-rich repeat flightless-interacting protein 2 isoform 1 [Mus musculus]	27	30	121	975457	2.98574e+08	4.4286e+07	2.51781e+08	1	52	12	56
295054266	SPNA2	NOT_in_TF_list	spectrin alpha chain, non-erythrocytic 1 isoform 2 [Mus musculus]	3	143	346	2.86152e+06	4.75275e+07	2.57297e+07	1.58649e+08	21	53	24	248
256000782	TPM1	NOT_in_TF_list	tropomyosin alpha-1 chain isoform 2 [Mus musculus]	3	23	111	5.13059e+07	5.71728e+07	1.51005e+09	3.23594e+08	12	9	55	35
295054271	SPNA2	NOT_in_TF_list	spectrin alpha chain, non-erythrocytic 1 isoform 3 [Mus musculus]	1	141	340	2.86152e+06	4.75275e+07	2.57297e+07	1.58649e+08	20	52	24	244
21704156	CALD1	NOT_in_TF_list	caldesmon 1 [Mus musculus]	40	41	209	1.4204e+06	3.92067e+08	6.40381e+08	5.32529e+08	3	59	72	75
189458847	COBLL1	NOT_in_TF_list	cordon-bleu protein-like 1 isoform 2 [Mus musculus]	59	59	165	0	1.45791e+07	8.59426e+07	1.52704e+08	1	17	18	129
91064867	DKC1	NOT_in_TF_list	H/ACA ribonucleoprotein complex subunit 4 [Mus musculus]	29	29	162	0	2.36322e+08	3.47926e+08	3.93956e+08	0	52	61	49
30519969	POLDIP3	NOT_in_TF_list	polymerase delta-interacting protein 3 [Mus musculus]	23	23	76	0	7.10292e+07	4.55698e+07	5.67466e+07	0	36	4	36
6680748	ATP5A1	NOT_in_TF_list	ATP synthase subunit alpha, mitochondrial precursor [Mus musculus]	39	39	257	3.15534e+06	9.34778e+08	7.41404e+07	1.49117e+09	8	100	14	135
8394460	TMOD3	NOT_in_TF_list	tropomodulin-3 [Mus musculus]	23	25	145	0	8.08429e+08	3.25881e+07	6.62408e+08	0	62	11	72
261862329	RAI14	NOT_in_TF_list	ankycorbin [Mus musculus]	56	56	200	0	1.48543e+08	1.31743e+07	1.49033e+08	0	78	20	102
19527358	PRPF19	NOT_in_TF_list	pre-mRNA-processing factor 19 isoform 2 [Mus musculus]	18	18	76	0	1.3298e+08	7.37085e+06	1.51877e+08	0	28	8	40
6753262	CAPZB	NOT_in_TF_list	F-actin-capping protein subunit beta isoform b [Mus musculus]	6	21	89	6.50709e+06	2.0981e+07	5.52659e+08	2.6726e+07	8	6	66	9
165905585	LIMA1	NOT_in_TF_list	LIM domain and actin-binding protein 1 isoform a [Mus musculus]	47	47	297	2.2114e+06	1.62447e+09	9.93706e+07	1.07113e+09	5	117	50	125
126517487	NFIX	GeneID:4784	nuclear factor 1 X-type isoform 1 [Mus musculus]	1	17	52	0	6.56768e+07	3.13499e+07	8.5177e+07	0	19	5	28
157042772	PCBP2	NOT_in_TF_list	poly(rC)-binding protein 2 isoform 3 [Mus musculus]	8	12	29	6.09061e+07	1.03596e+07	0	1.73145e+07	18	3	0	8
21313234	BAIAP2L1	NOT_in_TF_list	brain-specific angiogenesis inhibitor 1-associated protein 2-like protein 1 [Mus musculus]	31	31	64	0	145623	4.20512e+07	1.82703e+07	0	2	44	18
124248512	CPS1	NOT_in_TF_list	carbamoyl-phosphate synthase [ammonia], mitochondrial precursor [Mus musculus]	70	70	286	2.63434e+07	2.14237e+07	4.82436e+07	2.41606e+08	51	23	27	185
226443091	HNRNPA0	NOT_in_TF_list	heterogeneous nuclear ribonucleoprotein A0 [Mus musculus]	17	19	83	5.31972e+08	0	4.44264e+07	1.06543e+08	49	0	20	14
121949765	TMPO	NOT_in_TF_list	lamina-associated polypeptide 2 isoform epsilon [Mus musculus]	10	20	87	0	1.51468e+08	9.67896e+07	1.48981e+08	0	29	18	40
31981086	EFHD2	NOT_in_TF_list	EF-hand domain-containing protein D2 [Mus musculus]	16	16	56	6.70219e+06	4.67092e+06	2.55615e+08	9.57947e+06	8	6	31	11
6671507	ACTA2	NOT_in_TF_list	actin, aortic smooth muscle [Mus musculus]	1	32	783	2.86527e+07	75218734351	1.15734e+09	5.39333e+10	10	338	34	401
21704100	HADHB	NOT_in_TF_list	trifunctional enzyme subunit beta, mitochondrial precursor [Mus musculus]	26	26	94	0	2.07335e+08	3.05224e+06	2.19004e+08	0	42	2	50
13385680	DECR1	NOT_in_TF_list	2,4-dienoyl-CoA reductase, mitochondrial precursor [Mus musculus]	15	15	35	7.75428e+06	0	2.03199e+08	4.91756e+06	6	0	26	3
6996911	ASS1	NOT_in_TF_list	argininosuccinate synthase [Mus musculus]	24	24	108	0	2.51843e+08	4.45398e+06	2.05415e+08	0	46	3	59
166197681	PDLIM7	NOT_in_TF_list	PDZ and LIM domain protein 7 isoform a [Mus musculus]	18	18	40	0	6.20455e+07	0	7.5621e+07	0	17	0	23
6753404	CEBPB	GeneID:1051	CCAAT/enhancer-binding protein beta [Mus musculus]	12	13	64	0	4.05623e+06	3.70916e+07	3.92634e+08	0	2	13	49
254553321	RPS3A	NOT_in_TF_list	40S ribosomal protein S3a [Mus musculus]	16	16	49	1.52768e+07	2.56755e+06	8.77789e+07	3.37337e+06	12	2	28	7
163644252	PACSIN3	NOT_in_TF_list	protein kinase C and casein kinase II substrate protein 3 [Mus musculus]	20	20	46	0	1.0477e+08	0	1.29616e+08	0	19	0	27
117938334	SPNB2	NOT_in_TF_list	spectrin beta chain, non-erythrocytic 1 isoform 2 [Mus musculus]	1	102	243	3.22898e+06	5.76772e+07	9.70206e+06	1.13863e+08	17	42	8	176
71061470	LIG3	NOT_in_TF_list	DNA ligase 3 [Mus musculus]	60	60	400	0	1.00149e+09	1.164e+08	7.35242e+08	0	162	70	168
145301561	CAR1	NOT_in_TF_list	carbonic anhydrase 1 [Mus musculus]	8	8	12	0	0	6.32704e+06	0	0	0	12	0
121949760	TMPO	NOT_in_TF_list	lamina-associated polypeptide 2 isoform alpha [Mus musculus]	20	30	158	0	1.45102e+08	1.45662e+08	1.51081e+08	0	40	57	61
72384374	DDX21	NOT_in_TF_list	nucleolar RNA helicase 2 [Mus musculus]	43	44	216	2.35634e+06	3.07733e+08	9.99758e+07	4.97565e+08	8	64	34	110
407261700	MisMatch	NOT_in_TF_list	PREDICTED: elongation factor 1-alpha 1-like isoform 3 [Mus musculus]	19	19	136	1.35462e+06	7.5918e+08	2.87623e+07	8.88031e+08	3	51	11	71
126517469	MECP2	NOT_in_TF_list	methyl-CpG-binding protein 2 isoform 1 [Mus musculus]	31	31	219	0	1.26182e+08	6.64235e+08	1.37117e+08	0	39	114	66
88501745	TRIOBP	NOT_in_TF_list	TRIO and F-actin-binding protein isoform 1 [Mus musculus]	33	33	58	0	1.93422e+06	7.45174e+07	5.31702e+06	0	4	47	7
31982861	CAR3	NOT_in_TF_list	carbonic anhydrase 3 [Mus musculus]	13	13	25	1.00821e+07	0	2.63902e+07	0	12	0	13	0
22165384	TUBB2C	NOT_in_TF_list	tubulin beta-4B chain [Mus musculus]	1	17	53	385813	5.4805e+07	1.06264e+06	3.9495e+07	2	27	2	22
9790083	RUVBL1	NOT_in_TF_list	ruvB-like 1 [Mus musculus]	17	17	39	0	6.89679e+07	0	4.57803e+07	0	17	0	22
31980791	PLRG1	NOT_in_TF_list	pleiotropic regulator 1 [Mus musculus]	19	19	43	0	3.47943e+07	0	3.7331e+07	0	20	0	23
29126205	ACAA2	NOT_in_TF_list	3-ketoacyl-CoA thiolase, mitochondrial [Mus musculus]	15	15	45	0	4.17012e+07	1.80368e+06	7.51317e+07	0	20	3	22
225703070	CENPV	NOT_in_TF_list	centromere protein V [Mus musculus]	10	10	14	1.06834e+06	0	7.64737e+07	0	2	0	12	0
28173550	42985	NOT_in_TF_list	septin-7 isoform 1 [Mus musculus]	28	29	81	0	4.67815e+08	4.87407e+06	4.70036e+08	0	35	1	45
145587104	XRCC6	NOT_in_TF_list	X-ray repair cross-complementing protein 6 [Mus musculus]	34	34	125	0	8.87665e+06	4.35548e+08	5.13844e+06	0	13	107	5
117938332	SPNB2	NOT_in_TF_list	spectrin beta chain, non-erythrocytic 1 isoform 1 [Mus musculus]	8	109	272	3.22898e+06	4.66781e+07	2.91155e+07	1.33683e+08	18	47	10	197
226958577	2610301G19RIK	NOT_in_TF_list	DBIRD complex subunit KIAA1967 homolog [Mus musculus]	38	38	81	2.26632e+08	1.16156e+07	0	7.25818e+06	72	5	0	4
47894398	TPM4	NOT_in_TF_list	tropomyosin alpha-4 chain [Mus musculus]	18	20	34	2.63554e+06	2.71438e+06	8.85271e+07	3.22548e+07	3	2	28	1
356640163	MisMatch	NOT_in_TF_list	serine hydroxymethyltransferase, mitochondrial isoform 2 [Mus musculus]	22	22	47	0	4.20654e+07	0	4.398e+07	0	25	0	22
112734855	TOP1	NOT_in_TF_list	DNA topoisomerase 1 [Mus musculus]	49	51	433	1.44568e+06	1.17974e+09	3.14851e+08	1.8397e+09	1	141	76	215
83816893	DDX5	NOT_in_TF_list	probable ATP-dependent RNA helicase DDX5 [Mus musculus]	32	38	148	5.82509e+06	3.05317e+07	6.81477e+08	4.11945e+07	9	18	95	26
22779899	CDC5L	GeneID:988	cell division cycle 5-like protein [Mus musculus]	32	32	68	0	4.48035e+07	8.04144e+06	4.41167e+07	0	31	6	31
6755252	PURB	NOT_in_TF_list	transcriptional activator protein Pur-beta [Mus musculus]	10	13	31	0	7.56314e+06	2.69461e+06	3.44373e+08	0	3	2	26
126517474	NFIX	GeneID:4784	nuclear factor 1 X-type isoform 3 [Mus musculus]	2	18	58	0	6.56768e+07	3.13499e+07	8.5177e+07	0	21	7	30
83649737	CAPZB	NOT_in_TF_list	F-actin-capping protein subunit beta isoform a [Mus musculus]	1	16	74	6.50709e+06	1.7452e+07	5.52659e+08	3.4477e+07	7	5	55	7
7305075	G3BP1	NOT_in_TF_list	ras GTPase-activating protein-binding protein 1 [Mus musculus]	16	17	26	0	0	4.41235e+07	0	0	0	26	0
62990169	TWF1	NOT_in_TF_list	twinfilin-1 [Mus musculus]	14	14	28	0	974156	811380	5.02016e+07	0	1	1	26
116256514	HNRNPD	NOT_in_TF_list	heterogeneous nuclear ribonucleoprotein D0 isoform c [Mus musculus]	2	21	94	2.85036e+08	3.25208e+08	8.88835e+06	5.68178e+08	29	19	4	42
7106439	TUBB5	NOT_in_TF_list	tubulin beta-5 chain [Mus musculus]	3	17	48	385813	5.3577e+07	1.06264e+06	3.90356e+07	2	24	2	20
6678509	UOX	NOT_in_TF_list	uricase [Mus musculus]	20	20	65	4.26924e+06	0	1.35859e+07	1.63802e+08	7	0	17	41
22094075	SLC25A5	NOT_in_TF_list	ADP/ATP translocase 2 [Mus musculus]	19	19	77	7.42648e+07	1.5592e+07	3.68816e+08	2.36037e+07	23	6	34	14
120407050	NOP58	NOT_in_TF_list	nucleolar protein 58 [Mus musculus]	20	21	130	0	3.84999e+07	3.59625e+08	7.0927e+07	0	19	93	18
31981690	HSPA8	NOT_in_TF_list	heat shock cognate 71 kDa protein [Mus musculus]	26	29	102	2.01838e+06	3.92611e+06	2.02389e+08	1.63424e+07	4	7	74	17
189181668	ACTL6A	NOT_in_TF_list	actin-like protein 6A [Mus musculus]	15	15	49	0	1.01882e+08	0	1.29542e+08	0	22	0	27
13385872	ILF2	NOT_in_TF_list	interleukin enhancer-binding factor 2 [Mus musculus]	15	15	35	0	6.9102e+07	0	4.63594e+07	0	20	0	15
21728376	MYL12B	NOT_in_TF_list	myosin regulatory light chain 12B [Mus musculus]	1	7	20	445891	8.06529e+06	7.85828e+07	1.92563e+07	1	1	12	6
71037403	2900073G15RIK	NOT_in_TF_list	myosin light chain, regulatory B-like [Mus musculus]	1	7	20	445891	8.06529e+06	7.85828e+07	1.92563e+07	1	1	12	6
21426859	KRTAP16-5	NOT_in_TF_list	keratin-associated protein 19-3 [Mus musculus]	1	1	2	0	0	0	0	0	0	2	0
6680027	GLUD1	NOT_in_TF_list	glutamate dehydrogenase 1, mitochondrial precursor [Mus musculus]	28	28	159	0	2.62941e+08	3.13383e+06	3.41595e+08	0	76	3	80
163310765	ALB	NOT_in_TF_list	serum albumin precursor [Mus musculus]	32	32	182	1.23875e+08	562999138	2.18361e+09	4.96361e+08	18	3	110	51
482677666	MisMatch	NOT_in_TF_list	tropomyosin beta chain isoform 3 [Mus musculus]	10	19	60	4.18112e+07	4.69015e+07	1.22082e+09	3.04721e+08	4	8	12	36
6753622	DECR2	NOT_in_TF_list	peroxisomal 2,4-dienoyl-CoA reductase [Mus musculus]	13	13	45	1.92026e+07	3.187e+06	1.42473e+08	0	13	2	30	0
165932379	SERBP1	NOT_in_TF_list	plasminogen activator inhibitor 1 RNA-binding protein isoform 3 [Mus musculus]	20	20	56	0	9.61091e+07	1.09356e+06	7.72446e+07	0	26	4	26
60218877	ABCD3	NOT_in_TF_list	ATP-binding cassette sub-family D member 3 [Mus musculus]	30	30	69	620737	2.08951e+07	5.75009e+07	2.17727e+07	1	10	38	20
86262142	RBM14	NOT_in_TF_list	RNA-binding protein 14 [Mus musculus]	33	33	151	4.70032e+07	1.83111e+07	4.6344e+08	2.66759e+07	30	11	86	24
23956214	SFPQ	NOT_in_TF_list	splicing factor, proline- and glutamine-rich [Mus musculus]	30	31	173	5.54685e+06	4.76174e+08	2.5782e+08	6.19351e+08	10	62	29	72
116256516	HNRNPD	NOT_in_TF_list	heterogeneous nuclear ribonucleoprotein D0 isoform d [Mus musculus]	2	21	93	2.85036e+08	3.25208e+08	8.88835e+06	5.68178e+08	30	17	4	42
21426889	RPS11	NOT_in_TF_list	40S ribosomal protein S11 [Mus musculus]	9	9	15	4.5255e+07	0	4.30837e+06	724125	10	0	4	1
157277969	HNRNPA3	NOT_in_TF_list	heterogeneous nuclear ribonucleoprotein A3 isoform c [Mus musculus]	2	21	104	2.35183e+08	2.67233e+06	2.14189e+07	3.17463e+08	30	4	13	57
77404392	SND1	NOT_in_TF_list	staphylococcal nuclease domain-containing protein 1 [Mus musculus]	37	37	93	1.52091e+07	3.55254e+07	2.187e+06	6.05701e+07	2	41	4	46
61557491	AI597468	NOT_in_TF_list	UPF0444 transmembrane protein C12orf23 homolog [Mus musculus]	2	2	3	0	0	0	0	3	0	0	0
126723336	PHB2	NOT_in_TF_list	prohibitin-2 [Mus musculus]	12	12	25	0	0	1.69134e+07	5.90511e+06	1	0	17	7
21703842	D10WSU52E	NOT_in_TF_list	tRNA-splicing ligase RtcB homolog [Mus musculus]	22	22	75	0	3.96278e+07	7.67813e+06	8.04749e+07	0	30	16	29
47059026	SSBP1	NOT_in_TF_list	single-stranded DNA-binding protein, mitochondrial isoform 1 [Mus musculus]	6	6	17	6.88902e+06	0	3.31545e+07	1.16167e+06	5	0	11	1
22267442	UQCRC2	NOT_in_TF_list	cytochrome b-c1 complex subunit 2, mitochondrial precursor [Mus musculus]	19	20	58	0	5.73191e+07	408872	6.29042e+07	0	28	1	29
55926127	SPNB3	NOT_in_TF_list	spectrin beta chain, brain 2 [Mus musculus]	83	92	208	2.1968e+06	1.10313e+07	6.09728e+07	1.01272e+08	10	24	7	167
84370351	NFIC	GeneID:4782	nuclear factor 1 C-type isoform b [Mus musculus]	12	16	62	0	9.46808e+07	4.98773e+07	1.06804e+08	0	17	15	30
112363072	ARPC2	NOT_in_TF_list	actin-related protein 2/3 complex subunit 2 [Mus musculus]	14	14	24	2.20652e+06	0	7.41467e+07	704370	1	0	22	1
226823309	EIF4A1	NOT_in_TF_list	eukaryotic initiation factor 4A-I isoform 2 [Mus musculus]	13	15	35	886855	2.59164e+07	1.89626e+06	5.12012e+07	1	16	1	17
13386026	2700060E02RIK	NOT_in_TF_list	UPF0568 protein C14orf166 homolog [Mus musculus]	10	10	21	686244	1.18099e+06	4.43284e+07	0	1	1	19	0
67906175	42988	NOT_in_TF_list	septin-10 isoform 2 [Mus musculus]	13	16	46	0	4.03678e+08	4.87407e+06	3.16382e+08	0	26	1	19
13384620	HNRNPK	NOT_in_TF_list	heterogeneous nuclear ribonucleoprotein K [Mus musculus]	22	22	110	4.38487e+07	2.06579e+07	3.95025e+08	6.14698e+07	28	9	49	24
170295844	XRCC1	NOT_in_TF_list	DNA repair protein XRCC1 [Mus musculus]	27	27	138	0	6.80483e+08	2.31654e+08	4.68574e+08	0	51	33	54
22122615	ACTR1B	NOT_in_TF_list	beta-centractin [Mus musculus]	3	13	22	0	4.36889e+07	0	1.7178e+07	0	14	0	8
149251053	LOC100047429	NOT_in_TF_list	PREDICTED: ATP synthase subunit O, mitochondrial-like [Mus musculus]	9	9	16	5.62922e+06	1.55279e+06	3.80222e+07	0	5	1	10	0
7305109	EMG1	NOT_in_TF_list	ribosomal RNA small subunit methyltransferase NEP1 [Mus musculus]	9	9	11	0	4.26813e+06	1.37275e+07	0	0	1	10	0
164698428	CCL5	NOT_in_TF_list	C-C motif chemokine 5 precursor [Mus musculus]	1	1	1	0	0	856431	0	0	0	1	0
125656173	ACACA	NOT_in_TF_list	acetyl-CoA carboxylase 1 [Mus musculus]	78	94	228	0	1.16088e+07	5.26373e+06	9.79144e+07	0	37	17	174
355390287	MisMatch	NOT_in_TF_list	RNA binding motif protein, X-linked-like-1 [Mus musculus]	5	23	88	4.95788e+06	3.91627e+08	8.41771e+06	2.50089e+08	5	40	5	38
160333304	APOA1	NOT_in_TF_list	apolipoprotein A-I preproprotein [Mus musculus]	14	14	25	3.12846e+06	0	7.99723e+07	1.83308e+06	5	0	19	1
33859488	TUBB2A	NOT_in_TF_list	tubulin beta-2A chain [Mus musculus]	2	16	47	385813	5.3577e+07	1.06264e+06	3.94451e+07	2	25	2	18
57634518	42989	NOT_in_TF_list	septin-11 [Mus musculus]	13	21	73	0	3.93638e+08	4.87407e+06	3.39721e+08	0	29	1	43
183396771	HSPD1	NOT_in_TF_list	60 kDa heat shock protein, mitochondrial [Mus musculus]	24	24	42	1.10301e+06	1.05138e+06	3.14303e+07	7.6127e+06	3	1	27	11
7709990	BHMT	NOT_in_TF_list	betaine--homocysteine S-methyltransferase 1 [Mus musculus]	15	15	50	0	7.0656e+07	4.40725e+06	1.01927e+08	0	24	2	24
269784762	CBR4	NOT_in_TF_list	carbonyl reductase family member 4 [Mus musculus]	8	8	15	1.83301e+06	0	1.7877e+07	0	2	0	13	0
329664973	MisMatch	NOT_in_TF_list	actin-related protein 3 [Mus musculus]	17	17	43	0	8.5629e+07	0	8.94096e+07	0	23	0	20
31542602	ELAVL1	NOT_in_TF_list	ELAV-like protein 1 [Mus musculus]	14	14	35	4.92645e+07	0	2.57613e+07	9.42136e+06	19	0	8	8
37674277	HNRNPA3	NOT_in_TF_list	heterogeneous nuclear ribonucleoprotein A3 isoform a [Mus musculus]	1	20	107	2.35183e+08	2.67833e+06	2.14189e+07	3.17463e+08	31	5	13	58
6754092	GSTZ1	NOT_in_TF_list	maleylacetoacetate isomerase isoform 1 [Mus musculus]	8	8	9	0	0	1.67029e+07	617479	0	0	8	1
10181166	SMARCE1	GeneID:6605	SWI/SNF-related matrix-associated actin-dependent regulator of chromatin subfamily E member 1 [Mus musculus]	17	17	39	0	4.0439e+07	0	4.224e+07	0	15	0	24
309265983	GM15501	NOT_in_TF_list	PREDICTED: 40S ribosomal protein S8, partial [Mus musculus]	7	7	32	2.17242e+07	633214	5.45174e+07	5.54658e+06	12	1	14	5
6755763	THOC4	NOT_in_TF_list	THO complex subunit 4 [Mus musculus]	10	10	39	6.03712e+06	4.02528e+06	1.48135e+08	2.01724e+06	9	3	26	1
262231769	RBMX	NOT_in_TF_list	RNA-binding motif protein, X chromosome [Mus musculus]	4	21	72	4.92531e+06	3.91627e+08	8.41771e+06	2.50089e+08	4	32	5	31
164698479	42987	NOT_in_TF_list	septin-9 isoform a [Mus musculus]	28	28	86	0	3.35279e+07	2.54276e+08	4.8122e+07	0	11	57	18
70906453	BCAS2	NOT_in_TF_list	pre-mRNA-splicing factor SPF27 [Mus musculus]	9	9	12	0	0	2.70435e+07	0	0	0	12	0
31982724	MYBBP1A	NOT_in_TF_list	myb-binding protein 1A [Mus musculus]	54	54	241	5.48693e+06	2.82284e+07	2.01984e+07	2.96393e+08	15	36	34	156
29788787	SYNCRIP	NOT_in_TF_list	heterogeneous nuclear ribonucleoprotein Q isoform 2 [Mus musculus]	16	22	42	0	9.6044e+06	1.32962e+08	4.53006e+06	0	2	36	4
7305599	TTR	NOT_in_TF_list	transthyretin precursor [Mus musculus]	5	5	11	0	0	0	6.70739e+07	0	0	0	11
31982273	HSD17B4	NOT_in_TF_list	peroxisomal multifunctional enzyme type 2 [Mus musculus]	25	25	87	1.03203e+06	2.60766e+07	1.93903e+08	5.65552e+07	2	12	50	23
95772123	PPP1R12A	NOT_in_TF_list	protein phosphatase 1 regulatory subunit 12A [Mus musculus]	41	41	123	0	1.13732e+08	1.81808e+07	1.19793e+08	0	46	16	61
33504483	RPS9	NOT_in_TF_list	40S ribosomal protein S9 [Mus musculus]	13	13	24	3.66748e+07	1.31503e+06	1.69629e+07	1.0504e+07	12	1	7	4
33859811	HADHA	NOT_in_TF_list	trifunctional enzyme subunit alpha, mitochondrial precursor [Mus musculus]	30	30	109	437579	5.30437e+07	3.67795e+08	1.35395e+07	1	14	76	18
226874922	MPRIP	NOT_in_TF_list	myosin phosphatase Rho-interacting protein isoform 2 [Mus musculus]	43	43	153	0	5.73362e+07	3.50304e+07	9.17099e+07	0	55	14	84
213417799	RALY	NOT_in_TF_list	RNA-binding protein Raly short isoform [Mus musculus]	11	11	34	0	0	0	1.34148e+07	21	2	1	10
21450129	ACAT1	NOT_in_TF_list	acetyl-CoA acetyltransferase, mitochondrial precursor [Mus musculus]	14	14	30	0	3.68367e+07	0	3.72281e+07	0	14	0	16
6754994	PCBP1	NOT_in_TF_list	poly(rC)-binding protein 1 [Mus musculus]	7	11	30	3.54376e+07	4.44014e+06	0	1.27635e+07	15	3	0	12
194328773	SMARCD2	NOT_in_TF_list	SWI/SNF-related matrix-associated actin-dependent regulator of chromatin subfamily D member 2 isoform 1 [Mus musculus]	16	18	41	0	1.50502e+06	6.05829e+07	5.87466e+06	1	2	29	9
34328148	TOP2B	NOT_in_TF_list	DNA topoisomerase 2-beta [Mus musculus]	71	71	235	557961	4.09201e+07	5.15483e+07	2.36792e+08	1	48	12	174
6754976	PRDX1	NOT_in_TF_list	peroxiredoxin-1 [Mus musculus]	7	9	17	3.83407e+06	0	3.57886e+07	1.1837e+07	2	0	10	5
6671549	PRDX6	NOT_in_TF_list	peroxiredoxin-6 [Mus musculus]	8	8	10	1.15336e+06	0	6.94642e+06	0	1	0	9	0
162138894	FARSA	NOT_in_TF_list	phenylalanine--tRNA ligase alpha subunit [Mus musculus]	16	16	35	0	1.8679e+07	2.9236e+06	2.59668e+07	0	15	2	18
31981939	TUBB4	NOT_in_TF_list	tubulin beta-4A chain [Mus musculus]	2	14	40	235087	5.30476e+07	0	3.9495e+07	1	23	0	16
13385624	EIF2S1	NOT_in_TF_list	eukaryotic translation initiation factor 2 subunit 1 [Mus musculus]	13	13	13	0	0	0	1.96592e+07	0	0	0	13
18087805	RPS2	NOT_in_TF_list	40S ribosomal protein S2 [Mus musculus]	11	11	30	2.24186e+06	1.04205e+07	1.48976e+08	5.45325e+06	4	4	18	4
157384992	TCFE3	NOT_in_TF_list	transcription factor E3 isoform b [Mus musculus]	13	17	43	0	2.37482e+07	1.20348e+08	9.17759e+06	0	10	28	5
255308899	RPL3	NOT_in_TF_list	60S ribosomal protein L3 [Mus musculus]	17	18	40	0	4.74857e+07	3089624	5.57774e+07	0	16	2	22
20149756	EIF4A3	NOT_in_TF_list	eukaryotic initiation factor 4A-III [Mus musculus]	16	18	34	0	4.00789e+07	0	5.06435e+07	0	18	0	16
124487419	KRT2	NOT_in_TF_list	keratin, type II cytoskeletal 2 epidermal [Mus musculus]	17	26	162	4.97349e+08	8.39814e+08	5.26908e+08	1.11846e+09	52	26	26	58
268370034	MPG	NOT_in_TF_list	DNA-3-methyladenine glycosylase [Mus musculus]	9	9	9	0	0	0	1.14305e+07	0	0	0	9
224922835	SPECC1L	NOT_in_TF_list	cytospin-A isoform b [Mus musculus]	46	46	149	1.24515e+06	2.01712e+07	5.18235e+06	1.03548e+08	5	32	9	103
111185961	RBPMS	NOT_in_TF_list	RNA-binding protein with multiple splicing isoform 2 [Mus musculus]	5	7	14	2.65631e+07	0	4.9759e+06	0	9	0	4	1
160333605	XRCC5	NOT_in_TF_list	X-ray repair cross-complementing protein 5 [Mus musculus]	32	32	132	0	6.13616e+08	1.54506e+08	1.61106e+08	0	57	40	35
6753074	AP2M1	NOT_in_TF_list	AP-2 complex subunit mu [Mus musculus]	18	18	31	0	4.75487e+07	1.07785e+06	5.15434e+07	0	18	1	12
283436178	HNRNPC	NOT_in_TF_list	heterogeneous nuclear ribonucleoproteins C1/C2 isoform 2 [Mus musculus]	14	14	43	0	5.77861e+07	1.61085e+07	7.45129e+07	0	14	3	26
149273202	LOC100042025	NOT_in_TF_list	PREDICTED: glyceraldehyde-3-phosphate dehydrogenase-like isoform 2 [Mus musculus]	11	11	41	7.2328e+06	2.87777e+06	4.59308e+06	1.12223e+08	5	4	8	24
6754836	NFIA	GeneID:4774	nuclear factor 1 A-type isoform 2 [Mus musculus]	9	14	42	0	5.54402e+07	6.10071e+07	7.77576e+07	0	6	19	17
19527168	PSIP1	NOT_in_TF_list	PC4 and SFRS1-interacting protein [Mus musculus]	24	25	132	1.95047e+06	2.89894e+08	8.46936e+07	3.70437e+08	1	40	39	52
6754222	HNRNPAB	NOT_in_TF_list	heterogeneous nuclear ribonucleoprotein A/B isoform 2 [Mus musculus]	14	15	79	392074121	9.97927e+07	6.57957e+06	2.46097e+08	35	12	5	27
6753036	ALDH2	NOT_in_TF_list	aldehyde dehydrogenase, mitochondrial precursor [Mus musculus]	17	18	28	0	1.86168e+07	1.92392e+06	2.63609e+07	0	12	1	15
227500281	ETFA	NOT_in_TF_list	electron transfer flavoprotein subunit alpha, mitochondrial [Mus musculus]	11	11	18	1.3826e+06	0	1.91686e+07	0	3	0	15	0
6678137	SRPRB	NOT_in_TF_list	signal recognition particle receptor subunit beta [Mus musculus]	9	9	12	0	0	1.52858e+07	0	0	0	12	0
160707909	VASP	NOT_in_TF_list	vasodilator-stimulated phosphoprotein [Mus musculus]	13	13	31	0	5.54419e+07	2.36673e+06	1.02163e+07	0	24	1	6
31981515	RPL7	NOT_in_TF_list	60S ribosomal protein L7 [Mus musculus]	14	14	28	1.11992e+06	4.05643e+06	6.94446e+07	1.5167e+07	2	2	19	5
170014725	BDH1	NOT_in_TF_list	D-beta-hydroxybutyrate dehydrogenase, mitochondrial precursor [Mus musculus]	11	11	27	3.92338e+06	0	6.46656e+07	2.40794e+06	5	0	20	2
13277348	MORF4L1	NOT_in_TF_list	mortality factor 4-like protein 1 isoform b [Mus musculus]	10	10	11	0	7.23006e+06	0	1.56851e+07	0	1	0	10
47059143	CCDC124	NOT_in_TF_list	coiled-coil domain-containing protein 124 [Mus musculus]	10	10	17	0	2.62647e+06	4.1102e+07	0	0	1	16	0
13384730	SARNP	NOT_in_TF_list	SAP domain-containing ribonucleoprotein [Mus musculus]	8	8	13	0	0	8.96725e+07	5.68002e+06	0	0	11	2
27229277	TARS	NOT_in_TF_list	threonine--tRNA ligase, cytoplasmic [Mus musculus]	31	31	70	0	2.27715e+07	8.82829e+07	7.3224e+06	0	16	49	5
163838648	ATP5C1	NOT_in_TF_list	ATP synthase subunit gamma, mitochondrial isoform b [Mus musculus]	14	14	62	3.53066e+07	1.45653e+07	4.89178e+08	2.8572e+08	13	5	37	7
6755382	RUVBL2	NOT_in_TF_list	ruvB-like 2 [Mus musculus]	18	18	44	0	4.62546e+07	0	4.08828e+07	0	24	0	20
124249341	PPP1R12C	NOT_in_TF_list	protein phosphatase 1 regulatory subunit 12C [Mus musculus]	27	27	57	0	2.25047e+07	2.03013e+07	2.79739e+07	0	18	8	31
6671569	RPLP0	NOT_in_TF_list	60S acidic ribosomal protein P0 [Mus musculus]	9	9	16	0	0	221467	4.24355e+07	0	0	1	15
157951741	CAT	NOT_in_TF_list	catalase [Mus musculus]	18	18	34	1.98746e+06	3.03601e+06	1.97604e+07	1.58053e+07	2	4	17	11
23346601	SVIL	NOT_in_TF_list	supervillin [Mus musculus]	75	75	204	3.74422e+06	2.31539e+07	1.40194e+07	1.75805e+08	11	35	15	143
31560618	BUB3	NOT_in_TF_list	mitotic checkpoint protein BUB3 [Mus musculus]	12	12	38	0	3.57082e+07	1.69987e+06	5.67698e+07	0	9	3	26
255308881	PPP1R10	NOT_in_TF_list	serine/threonine-protein phosphatase 1 regulatory subunit 10 [Mus musculus]	30	30	85	0	5.9042e+07	8.99546e+06	5.98838e+07	0	38	8	39
110625924	RFC5	NOT_in_TF_list	replication factor C subunit 5 [Mus musculus]	11	11	16	0	0	0	1.12036e+07	0	0	0	16
22122825	ACTR2	NOT_in_TF_list	actin-related protein 2 [Mus musculus]	14	15	58	0	6.93544e+07	2.25153e+08	1.07484e+08	0	22	1	35
47059484	RBBP4	NOT_in_TF_list	histone-binding protein RBBP4 [Mus musculus]	6	12	28	0	9.94828e+07	0	7.82132e+07	0	14	0	14
7305443	RPL7A	NOT_in_TF_list	60S ribosomal protein L7a [Mus musculus]	14	14	28	1.83394e+06	4.88193e+06	6.28315e+07	1.19066e+07	1	2	18	7
157909799	RBBP7	NOT_in_TF_list	histone-binding protein RBBP7 [Mus musculus]	5	11	37	0	9.94828e+07	0	7.82132e+07	0	20	0	17
56090652	SLC25A42	NOT_in_TF_list	mitochondrial coenzyme A transporter SLC25A42 [Mus musculus]	10	10	17	530334	3.2803e+06	1.5033e+07	0	2	1	14	0
183980004	HNRNPL	NOT_in_TF_list	heterogeneous nuclear ribonucleoprotein L [Mus musculus]	15	15	58	5.12959e+07	1.52166e+06	8.72058e+07	5.47004e+06	25	1	28	4
149251776	LOC100046628	NOT_in_TF_list	PREDICTED: nucleophosmin-like [Mus musculus]	12	12	33	3.99742e+06	1.82833e+06	2.61432e+06	1.10561e+08	1	1	4	27
148747546	SERPINA3K	NOT_in_TF_list	serine protease inhibitor A3K precursor [Mus musculus]	17	17	57	70377.4	0	1.22155e+08	4.13251e+07	1	1	30	25
160333923	HNRNPU	NOT_in_TF_list	heterogeneous nuclear ribonucleoprotein U [Mus musculus]	35	36	199	9.3499e+06	1.11812e+09	1.71109e+08	1.01382e+09	11	70	40	78
31542413	CORO1C	NOT_in_TF_list	coronin-1C [Mus musculus]	19	19	67	0	2.16067e+08	9.86073e+07	1.96747e+08	0	24	19	24
227430367	SMU1	NOT_in_TF_list	WD40 repeat-containing protein SMU1 [Mus musculus]	14	14	26	0	1.39217e+07	0	1.65112e+07	0	11	0	15
6753620	DDX3X	NOT_in_TF_list	ATP-dependent RNA helicase DDX3X [Mus musculus]	5	24	69	1.15605e+06	9.87079e+06	1.02829e+08	8.61138e+06	4	6	43	16
30425250	ACTBL2	NOT_in_TF_list	beta-actin-like protein 2 [Mus musculus]	5	21	513	1.55763e+07	5.72038e+10	3.71435e+08	3.85759e+10	8	228	30	247
148223079	WDR82	NOT_in_TF_list	WD repeat-containing protein 82 [Mus musculus]	14	14	27	0	0	2.75133e+07	6.08722e+06	0	0	19	8
71067122	VRK1	NOT_in_TF_list	serine/threonine-protein kinase VRK1 isoform b [Mus musculus]	18	18	51	0	5.89583e+07	2.36114e+06	8.72732e+07	0	24	3	24
6677777	RPL26	NOT_in_TF_list	60S ribosomal protein L26 [Mus musculus]	9	9	9	3.51434e+07	0	0	0	9	0	0	0
256220343	DHRS4	NOT_in_TF_list	dehydrogenase/reductase SDR family member 4 isoform 1 [Mus musculus]	10	10	15	271734	0	4.35708e+07	0	1	0	14	0
21489935	KRT14	NOT_in_TF_list	keratin, type I cytoskeletal 14 [Mus musculus]	5	28	191	1.00909e+09	1.15051e+09	6.25045e+08	3.08088e+09	43	36	23	89
9789991	HSD17B12	NOT_in_TF_list	estradiol 17-beta-dehydrogenase 12 [Mus musculus]	11	11	13	1.82107e+06	0	2.05285e+07	0	1	0	12	0
357394934	MisMatch	NOT_in_TF_list	non-POU domain-containing octamer-binding protein [Mus musculus]	19	21	192	0	1.81976e+08	4.85027e+08	3.69133e+08	0	21	108	63
8392847	ACTR1A	NOT_in_TF_list	alpha-centractin [Mus musculus]	1	12	29	0	5.37956e+07	2.25153e+08	1.7178e+07	0	19	1	9
6678469	TUBA1C	NOT_in_TF_list	tubulin alpha-1C chain [Mus musculus]	5	15	54	0	5.70355e+07	4.39196e+06	5.22382e+07	0	19	6	29
6754084	GSTM1	NOT_in_TF_list	glutathione S-transferase Mu 1 [Mus musculus]	9	9	18	5.38848e+06	0	1.57807e+07	0	7	0	11	0
164519134	GATAD2A	GeneID:54815	transcriptional repressor p66 alpha isoform b [Mus musculus]	17	18	23	0	1.96547e+06	2.45819e+07	0	0	3	20	0
13385036	RPL15	NOT_in_TF_list	60S ribosomal protein L15 [Mus musculus]	8	8	15	0	0	2.01368e+07	4.77846e+06	0	1	8	6
407263460	MisMatch	NOT_in_TF_list	PREDICTED: uncharacterized protein LOC101055855 [Mus musculus]	5	5	24	0	0	0	0	20	0	4	0
20911031	KRT5	NOT_in_TF_list	keratin, type II cytoskeletal 5 [Mus musculus]	18	38	266	8.65976e+08	9.91585e+08	9.18832e+08	3.16456e+09	62	49	37	118
93587673	DDX17	NOT_in_TF_list	probable ATP-dependent RNA helicase DDX17 isoform 4 [Mus musculus]	19	25	86	1.01262e+06	2.54626e+07	4.55534e+08	3.12399e+07	4	9	62	11
149260287	LOC100045999	NOT_in_TF_list	PREDICTED: GTP-binding nuclear protein Ran-like [Mus musculus]	9	9	22	2.48445e+06	2.05609e+06	1.13158e+08	1.35765e+08	2	1	14	5
7106335	KRT17	NOT_in_TF_list	keratin, type I cytoskeletal 17 [Mus musculus]	8	26	118	6.87772e+08	1.46183e+09	8.68565e+08	4.34606e+09	23	25	16	54
25141235	DDX3Y	NOT_in_TF_list	ATP-dependent RNA helicase DDX3Y [Mus musculus]	4	23	63	694324	6.77245e+06	8.77916e+07	7.63153e+06	2	5	42	14
124249066	RBM15	NOT_in_TF_list	RNA binding motif protein 15 [Mus musculus]	29	29	46	0	2.93783e+07	692358	2.39459e+07	0	22	2	22
74271799	ACAD11	NOT_in_TF_list	acyl-CoA dehydrogenase family member 11 [Mus musculus]	27	28	90	0	1.22223e+08	4.1812e+07	5.26369e+07	0	32	25	33
306482623	HIST1H4M	NOT_in_TF_list	histone H4 [Mus musculus]	4	4	8	6.45063e+06	0	9.55065e+06	1.15535e+07	3	0	2	3
163644277	AP2A2	NOT_in_TF_list	AP-2 complex subunit alpha-2 [Mus musculus]	20	30	72	0	1.89593e+08	7.40419e+07	4.37271e+07	0	33	5	34
11528490	FLII	NOT_in_TF_list	protein flightless-1 homolog [Mus musculus]	27	44	165	3.10466e+06	1.6609e+08	1.75598e+07	2.13345e+08	9	25	14	117
13385486	LCE1A1	NOT_in_TF_list	small proline rich-like 3 [Mus musculus]	1	1	6	0	0	0	0	2	0	4	0
268837785	SF3B2	NOT_in_TF_list	splicing factor 3b, subunit 2 [Mus musculus]	27	27	56	0	2.27792e+07	3.86311e+06	3.05877e+07	0	24	5	27
309265861	LOC100504922	NOT_in_TF_list	PREDICTED: upstream stimulatory factor 2-like [Mus musculus]	2	3	3	0	3.55591e+06	0	5.32824e+06	0	2	0	1
157951743	H2-KE6	NOT_in_TF_list	estradiol 17-beta-dehydrogenase 8 [Mus musculus]	7	7	8	0	0	1.58934e+07	0	0	0	8	0
294832028	SLC25A13	NOT_in_TF_list	calcium-binding mitochondrial carrier protein Aralar2 isoform 2 [Mus musculus]	18	20	30	3.33343e+06	922652	3.63028e+07	916498	1	1	27	1
171906578	RAD23B	NOT_in_TF_list	UV excision repair protein RAD23 homolog B [Mus musculus]	12	14	50	0	3.85031e+07	1.37288e+08	3.16597e+07	0	12	25	13
21312994	SLC25A11	NOT_in_TF_list	mitochondrial 2-oxoglutarate/malate carrier protein [Mus musculus]	10	10	14	1.23414e+06	0	1.58631e+07	0	3	0	11	0
6678303	TFAM	GeneID:7019	transcription factor A, mitochondrial precursor [Mus musculus]	10	11	16	0	2.27914e+07	7.65048e+07	0	0	1	15	0
22122797	ACAA1B	NOT_in_TF_list	3-ketoacyl-CoA thiolase B, peroxisomal precursor [Mus musculus]	10	10	22	0	5.84308e+06	1.24609e+06	2.20061e+07	0	4	2	16
454528546	MisMatch	NOT_in_TF_list	zinc finger CCCH domain-containing protein 11A [Mus musculus]	23	23	63	0	3.41036e+07	3.10104e+07	4.97229e+07	0	27	5	31
20070404	USP39	NOT_in_TF_list	U4/U6.U5 tri-snRNP-associated protein 2 [Mus musculus]	17	17	29	0	1.93113e+07	5.13668e+07	0	0	1	28	0
31044465	SLC25A15	NOT_in_TF_list	mitochondrial ornithine transporter 1 isoform 1 [Mus musculus]	10	10	18	402065	0	2.75041e+07	0	1	0	17	0
358679344	MisMatch	NOT_in_TF_list	septin-6 isoform 4 [Mus musculus]	6	14	33	0	1.68632e+08	0	7.00534e+07	0	13	0	20
84662736	RPL6	NOT_in_TF_list	60S ribosomal protein L6 [Mus musculus]	12	12	37	0	6.64917e+06	5.20222e+06	3.47966e+07	0	7	9	21
153791358	SF3B1	NOT_in_TF_list	splicing factor 3B subunit 1 [Mus musculus]	33	33	61	0	1.03633e+07	0	4.17398e+07	0	8	0	53
62821772	TAF9	NOT_in_TF_list	adenylate kinase isoenzyme 6 isoform 1 [Mus musculus]	7	7	8	0	0	5.27962e+06	0	0	0	8	0
407264688	MisMatch	NOT_in_TF_list	PREDICTED: alpha-1-antitrypsin 1-1 isoform 5 [Mus musculus]	3	13	37	0	0	1.47947e+07	1.618e+08	0	0	5	32
110626031	KHDRBS1	NOT_in_TF_list	KH domain-containing, RNA-binding, signal transduction-associated protein 1 [Mus musculus]	13	16	46	0	2.66678e+07	3.2653e+08	2.43074e+07	0	7	29	10
254540168	HSPA5	NOT_in_TF_list	78 kDa glucose-regulated protein precursor [Mus musculus]	20	22	46	712640	1.40091e+06	9.4285e+07	6.21958e+06	3	2	36	5
31980694	RBPMS2	NOT_in_TF_list	RNA-binding protein with multiple splicing 2 [Mus musculus]	4	6	14	1.94574e+07	0	1.98491e+06	0	11	0	3	0
6678085	SERPINA1D	NOT_in_TF_list	alpha-1-antitrypsin 1-4 precursor [Mus musculus]	3	13	34	0	0	8.78536e+06	1.17572e+08	0	0	4	30
110625624	TCP1	NOT_in_TF_list	T-complex protein 1 subunit alpha [Mus musculus]	15	15	25	0	0	2.09415e+07	2.58937e+06	0	0	23	2
19527026	LRRC59	NOT_in_TF_list	leucine-rich repeat-containing protein 59 [Mus musculus]	10	10	17	0	0	9.08794e+06	6.68904e+07	0	0	3	14
110835723	DHX15	NOT_in_TF_list	putative pre-mRNA-splicing factor ATP-dependent RNA helicase DHX15 isoform 2 [Mus musculus]	25	26	68	0	4.05695e+07	7.62471e+06	2.80088e+07	0	35	10	23
121247429	XPC	NOT_in_TF_list	DNA repair protein complementing XP-C cells homolog [Mus musculus]	31	31	133	0	3.65198e+08	1.15249e+08	2.33068e+08	0	54	26	53
162461907	HSPA9	NOT_in_TF_list	stress-70 protein, mitochondrial [Mus musculus]	20	21	37	3.23051e+06	1.77921e+06	5.25395e+07	8.8837e+06	1	1	31	4
115298670	SNRNP40	NOT_in_TF_list	U5 small nuclear ribonucleoprotein 40 kDa protein [Mus musculus]	8	8	8	0	0	0	1.05514e+07	0	0	0	8
40254124	SMARCA5	GeneID:8467	SWI/SNF-related matrix-associated actin-dependent regulator of chromatin subfamily A member 5 [Mus musculus]	42	43	92	0	4.88405e+07	3.91521e+06	4.3588e+07	0	39	11	42
145046259	PAK1IP1	NOT_in_TF_list	p21-activated protein kinase-interacting protein 1 [Mus musculus]	9	9	20	0	1.75426e+07	0	1.83383e+07	0	8	0	12
56605680	THOC6	NOT_in_TF_list	THO complex subunit 6 homolog [Mus musculus]	9	9	12	0	0	0	3.87202e+07	0	0	0	12
158508460	AHCTF1	GeneID:25909	protein ELYS [Mus musculus]	62	62	167	0	1.85655e+07	3.55219e+07	8.83147e+07	0	23	36	108
21313640	AP2B1	NOT_in_TF_list	AP-2 complex subunit beta isoform b [Mus musculus]	18	30	79	0	4.77036e+07	3.67215e+06	5.01658e+07	0	33	8	38
19527256	DDX1	NOT_in_TF_list	ATP-dependent RNA helicase DDX1 [Mus musculus]	24	24	51	0	8.84151e+07	7.56935e+06	3.64677e+07	0	23	10	18
225543409	PSPC1	NOT_in_TF_list	paraspeckle component 1 [Mus musculus]	15	17	33	0	6.04882e+07	1.97351e+08	1.66764e+07	0	5	24	4
327315370	SORBS2	NOT_in_TF_list	sorbin and SH3 domain-containing protein 2 isoform 2 [Mus musculus]	1	35	135	723534	1.44509e+08	1.42015e+08	1.2136e+08	1	30	59	45
327315368	SORBS2	NOT_in_TF_list	sorbin and SH3 domain-containing protein 2 isoform 1 [Mus musculus]	1	35	138	723534	1.44509e+08	1.42015e+08	1.2136e+08	1	31	59	47
114052541	SNRPA	NOT_in_TF_list	U1 small nuclear ribonucleoprotein A [Mus musculus]	7	9	19	8.73926e+06	0	5.18126e+07	0	8	0	11	0
162417986	TDP1	NOT_in_TF_list	tyrosyl-DNA phosphodiesterase 1 [Mus musculus]	19	19	29	0	2.22665e+06	4.67331e+07	0	0	1	28	0
114205444	RPL38	NOT_in_TF_list	60S ribosomal protein L38 [Mus musculus]	2	2	4	0	3.69917e+06	2.24441e+06	0	0	2	1	1
54287684	EEF1D	NOT_in_TF_list	elongation factor 1-delta isoform b [Mus musculus]	7	7	7	0	0	0	8.32795e+06	0	0	0	7
157057174	ABLIM1	NOT_in_TF_list	actin-binding LIM protein 1 isoform 2 [Mus musculus]	19	19	53	0	4.15012e+06	5.29137e+07	1.37627e+07	0	4	38	11
6753294	CTNNA1	NOT_in_TF_list	catenin alpha-1 [Mus musculus]	20	26	45	0	1.17645e+07	695502	1.35066e+07	0	24	3	18
46519156	RPS24	NOT_in_TF_list	40S ribosomal protein S24 isoform 1 [Mus musculus]	4	4	10	1.51494e+07	1.37091e+06	1.83043e+06	0	6	1	3	0
23956332	THOC1	NOT_in_TF_list	THO complex subunit 1 [Mus musculus]	20	20	42	0	2.1355e+07	4.17821e+07	8.3877e+06	0	13	23	6
407263019	MisMatch	NOT_in_TF_list	PREDICTED: uncharacterized protein LOC545547 [Mus musculus]	1	1	6	0	0	0	0	2	0	4	0
50657345	TOP1MT	NOT_in_TF_list	DNA topoisomerase I, mitochondrial [Mus musculus]	17	19	60	0	5.8948e+08	1.44609e+08	7.04321e+08	0	9	33	18
154090941	KRT42	NOT_in_TF_list	keratin, type I cytoskeletal 42 [Mus musculus]	10	24	114	6.88132e+08	8.74637e+08	4.09774e+08	1.90167e+09	21	23	16	54
161484668	PPP1CB	NOT_in_TF_list	serine/threonine-protein phosphatase PP1-beta catalytic subunit [Mus musculus]	4	10	15	0	0	617062	7.08523e+07	0	0	2	13
19527092	RCC1	NOT_in_TF_list	regulator of chromosome condensation isoform 2 [Mus musculus]	9	9	26	0	5.72019e+07	0	6.41474e+07	0	12	0	14
13386170	LCE1B	NOT_in_TF_list	late cornified envelope 1B [Mus musculus]	1	1	1	0	0	0	0	1	0	0	0
37718972	SMARCC2	GeneID:6601	SWI/SNF complex subunit SMARCC2 isoform 3 [Mus musculus]	24	33	71	0	3.60277e+07	1.65541e+06	6.94021e+07	0	9	2	60
51491880	MTA2	GeneID:9219	metastasis-associated protein MTA2 [Mus musculus]	16	21	29	0	0	4.22412e+07	4.59416e+07	0	0	27	2
13386452	HIST3H2BA	NOT_in_TF_list	histone H2B type 3-A [Mus musculus]	1	4	18	3.55779e+06	1.67874e+06	9.97251e+06	1.02578e+07	2	2	6	8
157042798	ACACB	NOT_in_TF_list	acetyl-Coenzyme A carboxylase beta precursor [Mus musculus]	52	69	136	0	1.16088e+07	3.73968e+06	8.8282e+07	0	16	7	113
211065507	DARS	NOT_in_TF_list	aspartate--tRNA ligase, cytoplasmic isoform 1 [Mus musculus]	15	15	27	0	1.32547e+07	0	1.05059e+07	0	14	0	13
257796245	DLAT	NOT_in_TF_list	dihydrolipoyllysine-residue acetyltransferase component of pyruvate dehydrogenase complex, mitochondrial [Mus musculus]	17	17	45	0	3.25896e+06	2.51895e+08	4.17626e+06	0	2	39	4
31982755	VIM	NOT_in_TF_list	vimentin [Mus musculus]	15	18	44	2.02769e+08	3.22158e+08	8.60598e+07	7.30059e+08	2	10	14	18
6755594	EFTUD2	NOT_in_TF_list	116 kDa U5 small nuclear ribonucleoprotein component isoform a [Mus musculus]	26	26	54	0	2.21713e+07	862264	2.84411e+07	0	24	3	27
31560656	PABPC1	NOT_in_TF_list	polyadenylate-binding protein 1 [Mus musculus]	13	19	32	0	3.75205e+06	5.81473e+07	2.71041e+06	0	2	29	1
13430890	HIST1H1E	NOT_in_TF_list	histone H1.4 [Mus musculus]	3	10	63	1.10864e+07	5.66075e+07	2.93478e+08	9.3651e+08	6	9	15	33
239787892	TGM1	NOT_in_TF_list	protein-glutamine gamma-glutamyltransferase K [Mus musculus]	21	21	55	1.56335e+06	3.49317e+07	7.49854e+06	2.40675e+07	2	22	10	21
6678467	TUBA4A	NOT_in_TF_list	tubulin alpha-4A chain [Mus musculus]	3	13	42	0	4.58349e+07	3.29339e+06	4.76514e+07	0	16	4	22
31982526	PARVA	NOT_in_TF_list	alpha-parvin [Mus musculus]	12	12	21	0	5.21374e+06	0	1.4231e+07	0	6	0	15
38142460	ETFB	NOT_in_TF_list	electron transfer flavoprotein subunit beta [Mus musculus]	8	8	10	1.77026e+06	0	1.72251e+07	0	2	0	8	0
25141233	MATR3	NOT_in_TF_list	matrin-3 [Mus musculus]	21	21	59	0	6.6638e+07	4.41901e+06	5.28759e+07	0	30	6	23
28395018	JUP	NOT_in_TF_list	junction plakoglobin [Mus musculus]	19	22	74	9.36598e+06	9.91354e+06	1.36219e+07	2.99394e+07	20	11	16	27
254588110	HIST1H1D	NOT_in_TF_list	histone H1.3 [Mus musculus]	1	10	72	9.35276e+06	6.06878e+07	4.48793e+08	8.9659e+08	5	10	23	34
31982028	RSU1	NOT_in_TF_list	ras suppressor protein 1 [Mus musculus]	9	9	14	0	0	4.32152e+07	0	0	0	14	0
87196490	PAWR	NOT_in_TF_list	PRKC apoptosis WT1 regulator protein [Mus musculus]	10	10	24	0	3.49361e+07	293104	3.04168e+07	0	9	1	14
198278484	3110079O15RIK	NOT_in_TF_list	uncharacterized protein C2orf82 homolog precursor [Mus musculus]	1	1	1	0	0	0	0	0	0	1	0
6755004	AIFM1	NOT_in_TF_list	apoptosis-inducing factor 1, mitochondrial precursor [Mus musculus]	17	17	29	0	0	3.80584e+07	1.27389e+06	0	0	28	1
240255565	SMARCB1	NOT_in_TF_list	SWI/SNF-related matrix-associated actin-dependent regulator of chromatin subfamily B member 1 isoform 2 [Mus musculus]	11	11	28	0	6.73573e+07	751003	6.41564e+07	0	11	1	16
239985608	POLG2	NOT_in_TF_list	DNA polymerase subunit gamma-2, mitochondrial [Mus musculus]	12	12	21	0	2.78456e+07	0	2.10824e+07	0	9	0	12
13386166	LCE1E	NOT_in_TF_list	late cornified envelope protein family member [Mus musculus]	2	2	4	0	0	0	0	2	0	0	2
6753738	EIF2S3X	NOT_in_TF_list	eukaryotic translation initiation factor 2 subunit 3, X-linked [Mus musculus]	2	12	38	0	4.54488e+07	2924012	5.91475e+07	0	20	1	17
28316760	HIST1H2BB	NOT_in_TF_list	histone H2B type 1-B [Mus musculus]	1	4	19	4.8949e+06	1.67874e+06	9.97251e+06	9.87398e+06	3	2	6	8
116256510	AP2A1	NOT_in_TF_list	AP-2 complex subunit alpha-1 isoform b [Mus musculus]	15	25	52	0	3.82326e+07	1.897e+06	3.96794e+07	0	22	3	27
54020676	EIF2A	NOT_in_TF_list	eukaryotic translation initiation factor 2A [Mus musculus]	14	14	15	0	0	1.40843e+07	0	0	0	15	0
149251177	GM10071	NOT_in_TF_list	PREDICTED: 60S ribosomal protein L13-like [Mus musculus]	8	8	40	1.05002e+08	1.14636e+07	1.1068e+08	1.50776e+07	15	5	11	9
20330802	TRF	NOT_in_TF_list	serotransferrin precursor [Mus musculus]	23	23	39	0	0	7.6976e+07	2.70555e+06	0	0	38	1
157277950	RDX	NOT_in_TF_list	radixin isoform a [Mus musculus]	11	19	29	0	927581	5.62616e+07	4.14065e+06	0	1	26	2
314122205	TAOK3	NOT_in_TF_list	serine/threonine-protein kinase TAO3 [Mus musculus]	23	27	48	0	4.66131e+07	2.72656e+06	5.52475e+07	0	21	3	24
9845257	HIST1H1C	NOT_in_TF_list	histone H1.2 [Mus musculus]	2	10	74	9.35276e+06	6.06878e+07	5.07789e+08	8.9659e+08	5	10	23	36
261823961	MYO6	NOT_in_TF_list	unconventional myosin-VI [Mus musculus]	38	39	82	683391	6.19097e+06	0	4.54095e+07	4	18	1	59
226874906	YWHAE	NOT_in_TF_list	14-3-3 protein epsilon [Mus musculus]	4	7	13	6.78401e+06	0	2.13137e+07	8.88369e+06	1	0	8	4
228480232	SNRPA1	NOT_in_TF_list	U2 small nuclear ribonucleoprotein A' [Mus musculus]	8	8	10	291409	0	2.76752e+07	0	1	0	9	0
244790049	SQRDL	NOT_in_TF_list	sulfide:quinone oxidoreductase, mitochondrial [Mus musculus]	12	12	22	0	1.98773e+07	3.06274e+06	1.31685e+07	0	10	1	11
31560689	HMGCS2	NOT_in_TF_list	hydroxymethylglutaryl-CoA synthase, mitochondrial precursor [Mus musculus]	12	12	18	0	1.98461e+08	0	1.86337e+07	0	8	1	9
6677779	RPL28	NOT_in_TF_list	60S ribosomal protein L28 [Mus musculus]	5	5	11	2.81732e+06	984337	2.50381e+06	1.21528e+06	3	1	4	3
124486712	RRBP1	NOT_in_TF_list	ribosome-binding protein 1 isoform a [Mus musculus]	42	42	179	0	8.91367e+07	5.85811e+07	1.75503e+08	0	40	33	106
13384918	PARP9	NOT_in_TF_list	poly [ADP-ribose] polymerase 9 [Mus musculus]	20	20	35	0	1.71983e+07	517364	1.40329e+07	0	18	2	15
125347376	FLNA	NOT_in_TF_list	filamin-A [Mus musculus]	56	61	107	1.57627e+06	9.63779e+06	2.8398e+06	4.00864e+07	7	16	3	81
29336032	PAK4	NOT_in_TF_list	serine/threonine-protein kinase PAK 4 [Mus musculus]	15	15	39	1.60163e+06	0	1.13708e+08	2.4068e+07	1	0	34	4
118344444	IQGAP2	NOT_in_TF_list	ras GTPase-activating-like protein IQGAP2 [Mus musculus]	43	45	81	5.32935e+06	3.8294e+06	2.77802e+07	3.57716e+07	19	9	2	51
255003709	ROD1	NOT_in_TF_list	polypyrimidine tract-binding protein 3 isoform 1 [Mus musculus]	9	14	65	1.34783e+08	1.00476e+08	4.24099e+07	1.51948e+08	22	15	11	17
76881807	SERPINA1B	NOT_in_TF_list	alpha-1-antitrypsin 1-2 precursor [Mus musculus]	2	12	37	0	0	1.08659e+07	1.618e+08	0	0	6	31
54607171	KRT6A	NOT_in_TF_list	keratin, type II cytoskeletal 6A [Mus musculus]	3	31	200	8.65976e+08	9.91585e+08	9.76905e+08	3298721828	43	37	28	92
359751399	MisMatch	NOT_in_TF_list	dynamin-2 isoform 4 [Mus musculus]	1	24	36	0	1.1866e+07	0	2.76676e+07	0	14	0	22
7242148	EIF2S3Y	NOT_in_TF_list	eukaryotic translation initiation factor 2 subunit 3, Y-linked [Mus musculus]	1	12	33	0	4.54488e+07	2924012	5.95914e+07	0	17	1	15
407262506	MisMatch	NOT_in_TF_list	PREDICTED: protein flightless-1 homolog, partial [Mus musculus]	1	18	51	3.06344e+06	2.92385e+07	1.38208e+07	1.6305e+08	2	6	2	41
13386106	NUDT21	NOT_in_TF_list	cleavage and polyadenylation specificity factor subunit 5 [Mus musculus]	7	7	9	718922	0	1.35561e+07	0	2	0	7	0
157311641	LMO7	NOT_in_TF_list	LIM domain only 7 [Mus musculus]	49	49	151	2.8036e+06	4.17506e+07	2.78093e+07	1.42406e+08	7	24	13	107
51491845	CLTC	NOT_in_TF_list	clathrin heavy chain 1 [Mus musculus]	40	40	73	2.44738e+06	2.46141e+06	1.91411e+06	5.37227e+07	6	5	4	58
240255653	ILK	NOT_in_TF_list	integrin-linked protein kinase [Mus musculus]	15	15	38	0	1.69212e+07	0	4.95786e+07	0	14	0	24
87299637	DNM2	NOT_in_TF_list	dynamin-2 isoform 2 [Mus musculus]	1	24	36	0	1.1866e+07	0	2.76676e+07	0	14	0	22
459683864	MisMatch	NOT_in_TF_list	heterogeneous nuclear ribonucleoprotein R isoform a [Mus musculus]	11	17	36	0	8.00661e+06	1.32962e+08	4.84651e+06	0	5	27	4
61743961	AHNAK	NOT_in_TF_list	AHNAK nucleoprotein isoform 1 [Mus musculus]	58	58	94	0	2.24494e+06	1.97801e+06	3.29261e+07	0	7	2	85
21703948	RFC4	NOT_in_TF_list	replication factor C subunit 4 [Mus musculus]	8	8	12	0	0	0	1.06909e+07	0	0	0	12
6996913	ANXA2	NOT_in_TF_list	annexin A2 [Mus musculus]	9	9	24	4.8014e+06	2.82886e+06	3.28108e+06	1.6166e+07	5	1	5	13
20544149	CSNK1D	NOT_in_TF_list	casein kinase I isoform delta isoform 1 [Mus musculus]	9	9	11	0	6.06442e+06	0	5.98944e+06	0	8	0	3
124248579	G3BP2	NOT_in_TF_list	ras GTPase-activating protein-binding protein 2 isoform a [Mus musculus]	11	12	17	0	0	2.94055e+07	0	0	0	17	0
31981945	RPL13A	NOT_in_TF_list	60S ribosomal protein L13a [Mus musculus]	7	7	11	1.00237e+06	0	2.18345e+07	2.94781e+06	2	0	7	2
239985513	ATAD3A	NOT_in_TF_list	ATPase family AAA domain-containing protein 3 [Mus musculus]	19	19	25	0	2.23783e+06	3.52445e+07	1.47683e+06	0	2	22	1
226823218	FYTTD1	NOT_in_TF_list	UAP56-interacting factor isoform 2 [Mus musculus]	8	8	12	0	3.1213e+06	0	1.774e+07	0	2	0	10
13385838	LCE1H	NOT_in_TF_list	late cornified envelope 1H [Mus musculus]	1	1	8	0	0	0	0	7	0	1	0
165972309	SUCLG2	NOT_in_TF_list	succinyl-CoA ligase [GDP-forming] subunit beta, mitochondrial precursor [Mus musculus]	10	10	14	0	6.97787e+06	0	1.0634e+07	0	3	0	11
358439544	MisMatch	NOT_in_TF_list	mitochondrial inner membrane protein isoform 5 [Mus musculus]	16	16	20	0	2.25187e+06	9.09705e+06	236877	0	1	17	2
31982233	MTDH	NOT_in_TF_list	protein LYRIC [Mus musculus]	13	13	25	0	758399	1.7504e+07	1.49775e+06	0	2	19	4
8393832	NFIL3	GeneID:4783	nuclear factor interleukin-3-regulated protein [Mus musculus]	13	13	35	0	1.58303e+07	4.98192e+07	3.83935e+07	0	5	13	17
18152793	PDHB	NOT_in_TF_list	pyruvate dehydrogenase E1 component subunit beta, mitochondrial precursor [Mus musculus]	8	8	13	0	0	0	2.42979e+07	0	0	0	13
19527174	SF3B3	NOT_in_TF_list	splicing factor 3B subunit 3 [Mus musculus]	29	29	74	0	1.02384e+08	9.95887e+06	4.85884e+07	0	30	11	33
146134379	KRT9	NOT_in_TF_list	keratin, type I cytoskeletal 9 [Mus musculus]	5	5	14	0	0	0	0	14	0	0	0
31711990	LSM12	NOT_in_TF_list	protein LSM12 homolog [Mus musculus]	4	4	5	0	0	7.05118e+06	0	0	0	5	0
6679261	PDHA1	NOT_in_TF_list	pyruvate dehydrogenase E1 component subunit alpha, somatic form, mitochondrial precursor [Mus musculus]	12	12	27	0	9.60336e+06	0	2.94832e+07	0	10	0	17
9845253	HNRNPH2	NOT_in_TF_list	heterogeneous nuclear ribonucleoprotein H2 [Mus musculus]	6	10	25	1.4451e+06	5.11536e+07	3.57097e+06	7.34883e+07	1	9	1	14
226874851	ISG15	NOT_in_TF_list	ubiquitin-like protein ISG15 precursor [Mus musculus]	3	3	9	0	3.41105e+06	2.33007e+06	2.97199e+07	1	2	2	4
31543976	YWHAG	NOT_in_TF_list	14-3-3 protein gamma [Mus musculus]	3	8	14	5.06059e+06	0	2.57585e+07	2.29438e+06	2	0	10	2
28076935	DCTN2	NOT_in_TF_list	dynactin subunit 2 isoform 3 [Mus musculus]	9	9	14	0	1.16202e+07	0	3.74477e+06	0	10	0	4
165932270	SF3A1	NOT_in_TF_list	splicing factor 3A subunit 1 [Mus musculus]	18	18	34	0	1.73735e+07	298489	1.82628e+07	0	15	2	17
83699424	RPL18	NOT_in_TF_list	60S ribosomal protein L18 [Mus musculus]	5	5	11	0	5.40781e+06	2.93744e+07	6.94971e+06	0	2	5	4
30794450	RPL4	NOT_in_TF_list	60S ribosomal protein L4 [Mus musculus]	14	14	43	0	3.05519e+07	1.35027e+07	5.90337e+07	0	15	10	18
350606354	MisMatch	NOT_in_TF_list	plastin-2 [Mus musculus]	15	17	25	0	4.44292e+06	3.28825e+07	741882	0	3	20	2
6755368	RPS18	NOT_in_TF_list	40S ribosomal protein S18 [Mus musculus]	5	5	7	1.23787e+06	0	3.6156e+06	0	3	0	4	0
8567400	RPL27	NOT_in_TF_list	60S ribosomal protein L27 [Mus musculus]	3	3	6	673756	0	7.31689e+06	3.41432e+06	1	0	3	2
22122445	CDC73	NOT_in_TF_list	parafibromin [Mus musculus]	15	15	16	0	0	9.0642e+06	0	0	0	16	0
6678499	UGDH	NOT_in_TF_list	UDP-glucose 6-dehydrogenase [Mus musculus]	11	11	20	0	7.26347e+06	2.20174e+06	1.39942e+07	0	4	4	12
408821455	MisMatch	NOT_in_TF_list	myosin-14 isoform 2 [Mus musculus]	44	58	158	1.6225e+08	4.35699e+08	1.62101e+08	4.87215e+09	16	15	15	112
149258501	LOC100046151	NOT_in_TF_list	PREDICTED: phosphate carrier protein, mitochondrial-like isoform 1 [Mus musculus]	11	11	28	2.9176e+06	3.20625e+06	4.70772e+07	6.13703e+06	4	3	14	7
6724311	ADH1	NOT_in_TF_list	alcohol dehydrogenase 1 [Mus musculus]	10	10	21	0	7.11889e+06	2.138e+06	7.89834e+07	0	3	1	17
133904142	TERF2	GeneID:7014	telomeric repeat-binding factor 2 isoform 1 [Mus musculus]	12	12	17	0	958047	1.06059e+07	586376	0	1	15	1
31981100	RPS14	NOT_in_TF_list	40S ribosomal protein S14 [Mus musculus]	3	3	6	0	2.45735e+06	3.51407e+06	1.80703e+06	0	2	3	1
257196203	ZBTB20	GeneID:26137	zinc finger and BTB domain-containing protein 20 isoform S [Mus musculus]	13	13	48	0	3.75454e+07	6.23297e+06	4.99769e+07	0	17	9	22
27369587	THOC5	NOT_in_TF_list	THO complex subunit 5 homolog [Mus musculus]	17	17	35	0	3.44259e+08	6.60337e+07	3.98126e+06	0	9	24	2
13386336	LCE1L	NOT_in_TF_list	late cornified envelope 1L [Mus musculus]	2	2	6	0	0	0	0	6	0	0	0
30794140	PDIA5	NOT_in_TF_list	protein disulfide-isomerase A5 precursor [Mus musculus]	14	14	22	0	0	3.52366e+07	1.36408e+06	0	0	21	1
6678087	SERPINA1E	NOT_in_TF_list	alpha-1-antitrypsin 1-5 precursor [Mus musculus]	5	12	32	0	0	9.3242e+06	1.72566e+08	0	0	3	29
255003735	RPL10A	NOT_in_TF_list	60S ribosomal protein L10a [Mus musculus]	8	8	13	0	0	5.22039e+07	0	0	0	13	0
21314854	GATAD2B	GeneID:57459	transcriptional repressor p66-beta [Mus musculus]	11	12	15	0	0	1.78143e+07	0	0	0	15	0
162417980	AA986860	NOT_in_TF_list	specifically androgen-regulated gene protein [Mus musculus]	10	10	12	0	0	8.56745e+06	1.46171e+06	0	0	9	3
282398108	RPN1	NOT_in_TF_list	dolichyl-diphosphooligosaccharide--protein glycosyltransferase subunit 1 precursor [Mus musculus]	13	13	13	0	0	8.79175e+06	0	0	0	13	0
19311014	PPP1R14C	NOT_in_TF_list	protein phosphatase 1 regulatory subunit 14C [Mus musculus]	1	2	2	0	0	0	3.06257e+06	1	0	0	1
113680667	HSD3B5	NOT_in_TF_list	3 beta-hydroxysteroid dehydrogenase type 5 [Mus musculus]	7	8	24	0	3.73646e+07	0	6.0572e+07	0	10	0	14
113205059	YBX1	GeneID:4904	nuclease-sensitive element-binding protein 1 [Mus musculus]	3	7	12	0	2.51154e+07	0	1.45681e+07	0	7	0	5
75677414	CTTN	NOT_in_TF_list	src substrate cortactin isoform 1 [Mus musculus]	16	16	37	0	3094801	1.97196e+07	3.71637e+06	0	9	20	8
87196334	TCERG1	NOT_in_TF_list	transcription elongation regulator 1 [Mus musculus]	37	37	86	0	1.71361e+07	5.38986e+06	1.32809e+08	0	10	7	69
6680047	GNB2L1	NOT_in_TF_list	guanine nucleotide-binding protein subunit beta-2-like 1 [Mus musculus]	10	10	16	4.06078e+06	0	2.94371e+07	0	5	0	11	0
25014095	PARP3	NOT_in_TF_list	poly [ADP-ribose] polymerase 3 [Mus musculus]	13	13	23	0	0	6.32287e+07	1.2419e+06	0	1	21	1
59624981	TREX1	NOT_in_TF_list	three prime repair exonuclease 1 [Mus musculus]	9	9	20	5.14877e+07	0	1.11476e+06	4.32038e+06	17	0	1	2
21729749	POLB	NOT_in_TF_list	DNA polymerase beta [Mus musculus]	11	11	21	0	7.10523e+06	0	3.48384e+07	0	3	0	18
146149191	SNW1	NOT_in_TF_list	SNW domain-containing protein 1 [Mus musculus]	11	11	15	0	0	1.37577e+07	0	0	0	15	0
254692859	NDUFA9	NOT_in_TF_list	NADH dehydrogenase [ubiquinone] 1 alpha subcomplex subunit 9, mitochondrial precursor [Mus musculus]	8	8	8	0	0	0	4.78642e+06	0	0	0	8
78214312	ATP5F1	NOT_in_TF_list	ATP synthase subunit b, mitochondrial precursor [Mus musculus]	8	8	9	0	0	2.8211e+07	0	0	0	9	0
226958657	RPL19	NOT_in_TF_list	60S ribosomal protein L19 isoform 2 [Mus musculus]	6	6	17	5.16378e+06	6.46827e+06	4.83593e+07	6.37714e+06	2	2	8	5
407263600	MisMatch	NOT_in_TF_list	PREDICTED: 60S ribosomal protein L24-like [Mus musculus]	3	3	12	1.31456e+07	0	9.91088e+06	1.43728e+06	7	0	3	2
39930335	ABCF1	NOT_in_TF_list	ATP-binding cassette sub-family F member 1 [Mus musculus]	19	19	39	0	3.08662e+07	2.34778e+06	4.26967e+07	0	16	2	21
341604762	MisMatch	NOT_in_TF_list	Ras association (RalGDS/AF-6) and pleckstrin homology domains 1 [Mus musculus]	25	25	44	0	0	0	4.67033e+07	0	0	1	43
23346561	NAT10	NOT_in_TF_list	N-acetyltransferase 10 [Mus musculus]	24	24	40	0	9.10422e+06	0	1.03951e+07	0	22	0	18
19527166	VRK3	NOT_in_TF_list	inactive serine/threonine-protein kinase VRK3 [Mus musculus]	10	10	19	0	1.69132e+07	0	1.83055e+07	0	7	0	12
54607098	SDHA	NOT_in_TF_list	succinate dehydrogenase [ubiquinone] flavoprotein subunit, mitochondrial precursor [Mus musculus]	14	14	16	0	0	1.76535e+07	0	0	0	16	0
254826790	SLC25A10	NOT_in_TF_list	mitochondrial dicarboxylate carrier [Mus musculus]	7	7	14	664187	2.49705e+06	1.02388e+07	0	1	1	12	0
29789209	RAVER1	NOT_in_TF_list	ribonucleoprotein PTB-binding 1 [Mus musculus]	12	12	16	7.73927e+06	1.9557e+06	3.25383e+06	0	13	1	2	0
268370047	IFI27L1	NOT_in_TF_list	interferon, alpha-inducible protein 27 like 1 isoform 1 [Mus musculus]	2	2	5	0	0	0	0	5	0	0	0
261878607	HNRNPF	NOT_in_TF_list	heterogeneous nuclear ribonucleoprotein F [Mus musculus]	6	8	23	0	4.75847e+07	3.31012e+06	5.46882e+07	0	9	1	13
9790221	ARPC1A	NOT_in_TF_list	actin-related protein 2/3 complex subunit 1A [Mus musculus]	8	8	10	0	0	0	2.88102e+07	0	0	0	10
22122855	TMIE	NOT_in_TF_list	transmembrane inner ear expressed protein precursor [Mus musculus]	1	1	2	0	0	0	0	2	0	0	0
66955886	PDS5B	GeneID:23047	sister chromatid cohesion protein PDS5 homolog B [Mus musculus]	37	41	90	0	5.16966e+06	427962	8.94555e+07	0	14	2	74
254911131	TUFM	NOT_in_TF_list	elongation factor Tu, mitochondrial isoform 2 [Mus musculus]	10	10	18	0	1.52651e+07	2.355e+06	1.99646e+07	0	8	1	9
113205057	UBTF	GeneID:7343	nucleolar transcription factor 1 isoform 1 [Mus musculus]	19	19	43	0	3.19192e+07	3.09297e+06	3.72011e+07	0	19	6	18
124486765	PDS5A	NOT_in_TF_list	sister chromatid cohesion protein PDS5 homolog A [Mus musculus]	28	32	68	0	9.30551e+06	1.68703e+07	5.06305e+07	0	15	2	51
163965422	NFIB	GeneID:4781	nuclear factor 1 B-type isoform 2 [Mus musculus]	8	12	45	0	4.54537e+07	5.91212e+07	7.62816e+07	0	14	11	20
7305605	UBP1	GeneID:7342	upstream-binding protein 1 isoform b [Mus musculus]	12	13	18	0	0	3.39866e+07	0	0	0	18	0
9507079	SELENBP2	NOT_in_TF_list	selenium-binding protein 2 [Mus musculus]	10	10	18	0	6.24866e+06	1.06777e+07	6.73098e+06	0	10	3	5
258547148	DNAJA1	NOT_in_TF_list	dnaJ homolog subfamily A member 1 [Mus musculus]	9	10	18	0	2.38979e+07	0	3.1259e+07	0	8	0	10
161016795	DDX6	NOT_in_TF_list	probable ATP-dependent RNA helicase DDX6 [Mus musculus]	9	9	12	0	6.3137e+06	0	1.05022e+07	0	6	0	6
224994233	KDM1A	NOT_in_TF_list	lysine-specific histone demethylase 1A [Mus musculus]	18	18	27	0	1.69008e+07	0	1.57275e+07	0	10	0	17
27369527	CDKN2AIP	NOT_in_TF_list	CDKN2A-interacting protein [Mus musculus]	12	12	13	0	0	1.50048e+07	0	0	0	13	0
6679066	NIPSNAP1	NOT_in_TF_list	protein NipSnap homolog 1 [Mus musculus]	9	9	16	3.61173e+06	0	9.57239e+07	0	2	0	14	0
21450271	NCOA5	NOT_in_TF_list	nuclear receptor coactivator 5 [Mus musculus]	9	9	21	2.51155e+06	3.03022e+06	1.54109e+07	9.70263e+06	1	3	14	3
13507666	LACTB	NOT_in_TF_list	serine beta-lactamase-like protein LACTB, mitochondrial precursor [Mus musculus]	13	13	30	0	3.09871e+07	3.87423e+06	5.05741e+07	0	13	1	16
134053929	COIL	NOT_in_TF_list	coilin [Mus musculus]	14	14	23	0	4.07317e+06	5.32025e+07	5.0374e+06	0	1	20	2
6754094	GTF2H4	NOT_in_TF_list	general transcription factor IIH subunit 4 [Mus musculus]	9	9	15	0	9.6533e+06	0	1.05232e+07	0	8	0	7
390190197	MisMatch	NOT_in_TF_list	glutaryl-CoA dehydrogenase, mitochondrial [Mus musculus]	8	8	21	0	2.51385e+07	0	3.53614e+07	0	10	0	11
13626034	TCFAP4	GeneID:7023	transcription factor AP-4 [Mus musculus]	9	9	17	0	1.22569e+07	0	5.01916e+06	0	12	0	5
13384908	1700011A15RIK	NOT_in_TF_list	uncharacterized protein LOC66322 [Mus musculus]	1	3	4	7.43763e+07	0	0	0	3	0	0	1
21312752	MRRF	NOT_in_TF_list	ribosome-recycling factor, mitochondrial precursor [Mus musculus]	5	5	8	0	0	1.31797e+07	0	0	0	8	0
164663872	EPB4.1L5	NOT_in_TF_list	band 4.1-like protein 5 isoform 2 [Mus musculus]	1	12	21	0	3.84087e+06	1.18821e+07	5.1047e+06	0	2	15	4
31560697	H1F0	NOT_in_TF_list	histone H1.0 [Mus musculus]	5	5	36	5.35462e+06	3.89864e+06	8.42671e+07	9.04834e+07	6	3	8	19
31981555	LAD1	NOT_in_TF_list	ladinin-1 [Mus musculus]	15	15	20	0	1.99608e+06	3.9663e+07	0	0	1	19	0
58037465	RPL18A	NOT_in_TF_list	60S ribosomal protein L18a [Mus musculus]	5	5	7	1.05478e+06	0	5.05252e+06	0	2	0	5	0
30578401	CYP27A1	NOT_in_TF_list	sterol 26-hydroxylase, mitochondrial [Mus musculus]	11	11	20	0	1.73495e+07	0	1.92841e+07	0	12	0	8
87162464	HDAC2	NOT_in_TF_list	histone deacetylase 2 [Mus musculus]	7	11	23	0	0	4.88308e+07	7.12552e+06	0	0	17	6
124249204	RFC3	NOT_in_TF_list	replication factor C subunit 3 [Mus musculus]	9	9	16	0	1.18777e+06	0	1.23948e+07	0	2	0	14
110665722	TAF5	NOT_in_TF_list	transcription initiation factor TFIID subunit 5 [Mus musculus]	16	16	23	0	9.40291e+06	707611	1.0755e+07	0	11	2	10
294831970	SLC25A22	NOT_in_TF_list	mitochondrial glutamate carrier 1 [Mus musculus]	7	7	7	0	0	1.30492e+07	0	0	0	7	0
6679811	FLOT2	NOT_in_TF_list	flotillin-2 isoform 2 [Mus musculus]	9	9	11	0	2.82891e+06	0	3.79762e+06	0	7	0	4
84875537	NCL	NOT_in_TF_list	nucleolin [Mus musculus]	18	18	37	785721	2.23015e+07	5.09789e+06	2.80007e+07	2	11	8	16
62243852	SLTM	NOT_in_TF_list	SAFB-like transcription modulator isoform b [Mus musculus]	27	27	105	2.08272e+06	4.67441e+07	1.12571e+08	1.2132e+08	3	23	6	73
125987599	CD2AP	NOT_in_TF_list	CD2-associated protein [Mus musculus]	14	14	19	0	2.27081e+06	1.13013e+07	661677	0	2	16	1
10946928	HNRNPH1	NOT_in_TF_list	heterogeneous nuclear ribonucleoprotein H [Mus musculus]	4	9	27	1.4451e+06	5.86228e+07	3.57097e+06	7.58139e+07	1	11	1	14
49274606	PPFIBP1	NOT_in_TF_list	liprin-beta-1 isoform 2 [Mus musculus]	19	21	30	0	1.00169e+07	0	1.41336e+07	0	10	0	20
13384846	PNO1	NOT_in_TF_list	RNA-binding protein PNO1 [Mus musculus]	4	4	4	0	0	4.13912e+06	0	0	0	4	0
118403314	RBM39	NOT_in_TF_list	RNA-binding protein 39 [Mus musculus]	10	10	15	3.60417e+06	0	6.87587e+06	0	8	0	7	0
31982856	DLD	NOT_in_TF_list	dihydrolipoyl dehydrogenase, mitochondrial precursor [Mus musculus]	11	11	37	0	1.55964e+07	1.62822e+07	3.30982e+07	0	11	11	15
170650623	PDLIM5	NOT_in_TF_list	PDZ and LIM domain protein 5 isoform ENH1 [Mus musculus]	10	10	16	0	0	1.80726e+07	0	0	0	16	0
31560705	ACSL1	NOT_in_TF_list	long-chain-fatty-acid--CoA ligase 1 [Mus musculus]	14	17	20	0	0	4.96712e+07	0	0	0	20	0
27229058	DDX47	NOT_in_TF_list	probable ATP-dependent RNA helicase DDX47 [Mus musculus]	10	10	15	0	14542595	0	1.30778e+07	0	9	0	6
6753320	CCT3	NOT_in_TF_list	T-complex protein 1 subunit gamma [Mus musculus]	11	11	12	0	0	1.16692e+07	1.89968e+06	0	0	11	1
13994195	PPP1CA	NOT_in_TF_list	serine/threonine-protein phosphatase PP1-alpha catalytic subunit [Mus musculus]	3	9	13	0	0	1.00059e+06	3.91261e+07	0	0	1	12
13385044	RPL35	NOT_in_TF_list	60S ribosomal protein L35 [Mus musculus]	3	3	5	4.94078e+07	0	0	0	4	0	0	1
33563256	GNAI3	NOT_in_TF_list	guanine nucleotide-binding protein G(k) subunit alpha [Mus musculus]	2	7	12	0	1.61598e+07	0	3.15349e+07	0	3	0	9
6678053	SNRPB	NOT_in_TF_list	small nuclear ribonucleoprotein-associated protein B [Mus musculus]	7	7	19	4.35042e+06	0	6.04441e+07	0	3	0	16	0
13384710	GAR1	NOT_in_TF_list	H/ACA ribonucleoprotein complex subunit 1 [Mus musculus]	7	7	12	0	8.73865e+06	3.65638e+08	0	0	3	9	0
28201978	PDHX	NOT_in_TF_list	pyruvate dehydrogenase protein X component, mitochondrial [Mus musculus]	10	10	19	0	2.01864e+07	0	2.8338e+07	0	7	0	12
269784687	SLC25A21	NOT_in_TF_list	mitochondrial 2-oxodicarboxylate carrier isoform 1 [Mus musculus]	8	8	8	0	0	7.45846e+06	0	0	0	8	0
75677435	ALDH3A2	NOT_in_TF_list	fatty aldehyde dehydrogenase [Mus musculus]	11	11	29	0	1.92814e+07	0	1.71875e+07	0	15	0	14
124244096	SART1	NOT_in_TF_list	U4/U6.U5 tri-snRNP-associated protein 1 [Mus musculus]	16	16	28	0	1.15576e+07	1.3117e+07	1.97921e+07	0	11	5	12
23943838	SLC25A1	NOT_in_TF_list	solute carrier family 25, member 1 [Mus musculus]	8	8	19	5.48307e+06	2.81236e+06	5.03201e+07	0	3	1	15	0
22779924	RBM17	NOT_in_TF_list	splicing factor 45 [Mus musculus]	9	9	17	0	3.00161e+07	0	1.99765e+07	0	11	0	6
37537556	WIPF2	NOT_in_TF_list	WAS/WASL-interacting protein family member 2 [Mus musculus]	8	8	15	0	1.13211e+07	0	7.76124e+06	0	8	0	7
67906168	NR2C2	GeneID:7182	nuclear receptor subfamily 2 group C member 2 [Mus musculus]	11	11	11	0	0	8.21435e+06	0	0	0	11	0
21362343	THYN1	NOT_in_TF_list	thymocyte nuclear protein 1 [Mus musculus]	6	6	8	0	0	2.55332e+07	0	0	0	8	0
41054806	GNAI2	NOT_in_TF_list	guanine nucleotide-binding protein G(i) subunit alpha-2 [Mus musculus]	2	7	13	0	1.2242e+07	0	2.66108e+07	0	4	0	9
6680604	KRT16	NOT_in_TF_list	keratin, type I cytoskeletal 16 [Mus musculus]	7	16	112	9.76717e+08	1.09425e+09	5.90007e+08	2.56763e+09	23	17	17	55
21313618	CHCHD3	NOT_in_TF_list	coiled-coil-helix-coiled-coil-helix domain-containing protein 3, mitochondrial precursor [Mus musculus]	5	5	5	0	0	1.04907e+07	0	0	0	5	0
27754056	TUBB6	NOT_in_TF_list	tubulin beta-6 chain [Mus musculus]	2	10	22	385813	5.3577e+07	1.94537e+06	1.50473e+07	2	14	1	5
160333863	TJP2	NOT_in_TF_list	tight junction protein ZO-2 isoform 2 [Mus musculus]	25	25	36	431773	4.01604e+06	0	2.16456e+07	1	4	0	31
6679184	OTC	NOT_in_TF_list	ornithine carbamoyltransferase, mitochondrial precursor [Mus musculus]	8	8	16	0	0	9.10337e+06	1.52652e+07	0	0	1	15
120300971	ERC1	NOT_in_TF_list	ELKS/Rab6-interacting/CAST family member 1 isoform 1 [Mus musculus]	28	28	40	0	4.01226e+06	4.93855e+06	1.95561e+07	0	7	4	29
112983636	KRT10	NOT_in_TF_list	keratin, type I cytoskeletal 10 [Mus musculus]	14	17	149	1.23379e+09	1.31917e+09	7.2428e+08	3.38451e+09	32	26	22	69
25742730	RPL32	NOT_in_TF_list	60S ribosomal protein L32 [Mus musculus]	3	3	3	1.71629e+06	0	3.55593e+06	0	1	0	2	0
111607434	ILF3	NOT_in_TF_list	interleukin enhancer-binding factor 3 isoform 3 [Mus musculus]	15	17	32	0	1.92361e+07	4.298e+06	1.82746e+07	0	15	3	14
262050553	PLS3	NOT_in_TF_list	plastin-3 [Mus musculus]	11	13	17	0	0	1.24442e+07	0	0	1	16	0
260166642	CTNNB1	NOT_in_TF_list	catenin beta-1 [Mus musculus]	13	16	30	619167	1.21277e+07	1.67374e+06	1.86064e+07	1	14	3	12
21313679	ATP5H	NOT_in_TF_list	ATP synthase subunit d, mitochondrial [Mus musculus]	4	4	5	0	0	1.52188e+06	0	0	0	5	0
262205252	TEAD1	GeneID:7003	transcriptional enhancer factor TEF-1 isoform 3 [Mus musculus]	9	10	24	0	2.76416e+07	0	2.68023e+07	0	13	0	11
32469507	CD59B	NOT_in_TF_list	CD59B glycoprotein precursor [Mus musculus]	1	1	3	0	0	485389	0	0	0	3	0
229892322	NDUFS1	NOT_in_TF_list	NADH-ubiquinone oxidoreductase 75 kDa subunit, mitochondrial precursor [Mus musculus]	15	15	15	0	0	6.34645e+06	0	0	0	15	0
21450325	BLVRB	NOT_in_TF_list	flavin reductase (NADPH) [Mus musculus]	3	3	3	0	0	1.39406e+07	0	0	0	3	0
115583687	PRPF8	NOT_in_TF_list	pre-mRNA-processing-splicing factor 8 [Mus musculus]	45	45	52	0	0	0	1.8006e+07	0	1	0	51
226958349	TPI1	NOT_in_TF_list	triosephosphate isomerase [Mus musculus]	6	6	11	605791	0	5.75471e+06	0	3	0	8	0
21313674	INTS12	NOT_in_TF_list	integrator complex subunit 12 [Mus musculus]	8	8	15	0	5.2176e+06	1.26983e+06	6.13806e+06	0	6	3	6
46909569	GATA4	GeneID:2626	transcription factor GATA-4 [Mus musculus]	5	5	18	0	2.37219e+07	1.39648e+06	1.90199e+07	0	9	2	7
172073171	TBP	GeneID:6908	TATA-box-binding protein [Mus musculus]	6	6	8	0	0	1.49927e+07	1.55931e+07	0	0	1	7
126521835	CCT2	NOT_in_TF_list	T-complex protein 1 subunit beta [Mus musculus]	8	8	12	0	5.47139e+06	0	5.86606e+06	0	5	0	7
254553342	HSD17B13	NOT_in_TF_list	17-beta-hydroxysteroid dehydrogenase 13 isoform 1 precursor [Mus musculus]	4	5	7	0	0	2.64824e+06	1.65282e+07	0	0	2	5
40018610	SNRNP200	NOT_in_TF_list	U5 small nuclear ribonucleoprotein 200 kDa helicase [Mus musculus]	42	42	49	0	0	1.56352e+07	1.68189e+07	0	0	2	47
407264603	MisMatch	NOT_in_TF_list	PREDICTED: ferritin light chain 1-like isoform 3 [Mus musculus]	3	3	3	0	0	2.04507e+06	0	1	0	2	0
21704042	CSTF3	NOT_in_TF_list	cleavage stimulation factor subunit 3 isoform 1 [Mus musculus]	14	14	15	0	0	6.24681e+06	0	0	0	15	0
244790095	MYEF2	NOT_in_TF_list	myelin expression factor 2 isoform 3 [Mus musculus]	12	12	17	1.57371e+06	0	1.21755e+07	0	2	0	15	0
356995868	MisMatch	NOT_in_TF_list	spliceosome RNA helicase Ddx39b [Mus musculus]	3	9	14	0	9.24501e+06	0	8.85007e+06	0	8	0	6
10092608	GSTP1	NOT_in_TF_list	glutathione S-transferase P 1 [Mus musculus]	4	4	12	4.02257e+06	0	2.51346e+07	757888	3	0	8	1
6680193	HDAC1	NOT_in_TF_list	histone deacetylase 1 [Mus musculus]	5	9	16	0	0	5.71077e+07	7.50436e+06	0	1	13	2
18252790	WDR5	NOT_in_TF_list	WD repeat-containing protein 5 [Mus musculus]	6	6	8	0	0	0	1.69861e+07	0	0	0	8
165377291	WTAP	NOT_in_TF_list	pre-mRNA-splicing regulator WTAP isoform a [Mus musculus]	8	8	11	0	7.82428e+06	0	2.2041e+06	0	8	0	3
40353220	BCKDHB	NOT_in_TF_list	2-oxoisovalerate dehydrogenase subunit beta, mitochondrial [Mus musculus]	5	5	6	0	0	0	2.61637e+07	0	0	0	6
355390306	MisMatch	NOT_in_TF_list	methyltransferase-like protein 20 isoform b [Mus musculus]	1	1	1	0	0	0	0	0	0	1	0
126116585	KRT1	NOT_in_TF_list	keratin, type II cytoskeletal 1 [Mus musculus]	8	14	127	2.25407e+09	1.58013e+09	2.11779e+09	5.23193e+09	32	29	23	43
150456419	DHX9	NOT_in_TF_list	ATP-dependent RNA helicase A [Mus musculus]	28	28	51	0	3.38611e+06	1.76875e+06	2.56861e+07	0	7	1	43
256985213	DDX52	NOT_in_TF_list	probable ATP-dependent RNA helicase DDX52 [Mus musculus]	12	12	12	0	0	9.66262e+06	4.72086e+06	0	0	11	1
6679809	FLOT1	NOT_in_TF_list	flotillin-1 [Mus musculus]	8	8	10	0	1.29989e+07	2.35512e+06	1.00685e+07	0	3	1	6
21426823	HIST1H1A	NOT_in_TF_list	histone H1.1 [Mus musculus]	3	5	24	6.32647e+06	5.39592e+07	2.33885e+08	5.53179e+08	2	2	9	11
6753322	CCT4	NOT_in_TF_list	T-complex protein 1 subunit delta [Mus musculus]	12	12	17	0	1.71962e+06	3.84766e+06	2.77061e+06	0	4	8	5
39204553	CHD4	NOT_in_TF_list	chromodomain-helicase-DNA-binding protein 4 [Mus musculus]	30	42	63	0	3.73048e+06	0	4.37089e+07	0	4	0	59
27229036	SRPR	NOT_in_TF_list	signal recognition particle receptor subunit alpha [Mus musculus]	14	14	18	0	0	1.61042e+07	0	0	0	18	0
31980772	PPP1CC	NOT_in_TF_list	serine/threonine-protein phosphatase PP1-gamma catalytic subunit [Mus musculus]	2	7	10	0	0	1.00059e+06	3.91261e+07	0	0	1	9
226246593	ACTR10	NOT_in_TF_list	actin-related protein 10 [Mus musculus]	7	7	8	0	8.04166e+06	0	4.37464e+06	0	6	0	2
407263462	MisMatch	NOT_in_TF_list	PREDICTED: uncharacterized protein LOC101055862 [Mus musculus]	4	4	7	0	0	0	0	6	0	1	0
167621502	PLEKHG3	NOT_in_TF_list	pleckstrin homology domain-containing family G member 3 [Mus musculus]	26	26	42	0	1.25776e+06	1.07745e+06	2.98785e+07	0	2	1	39
359385698	MisMatch	NOT_in_TF_list	14-3-3 protein zeta/delta isoform 1 [Mus musculus]	3	6	13	3.64707e+06	0	2.16481e+07	2.29438e+06	2	0	9	2
171846285	HP1BP3	NOT_in_TF_list	heterochromatin protein 1-binding protein 3 isoform 1 [Mus musculus]	12	12	22	0	3.08064e+06	1.69975e+07	5.37035e+06	0	2	16	4
40556608	HSP90AB1	NOT_in_TF_list	heat shock protein HSP 90-beta [Mus musculus]	8	15	19	0	5.17479e+06	898280	7.17583e+06	0	7	1	11
188528897	PHLDB2	NOT_in_TF_list	pleckstrin homology-like domain family B member 2 isoform 2 [Mus musculus]	23	23	28	0	4.42869e+06	0	1.27948e+07	0	2	1	25
262331511	HMGA1	GeneID:3159	high mobility group protein HMG-I/HMG-Y isoform c [Mus musculus]	2	2	3	0	0	2.17327e+07	0	0	0	3	0
306518591	UGT2B5	NOT_in_TF_list	UDP-glucuronosyltransferase 2B17 precursor [Mus musculus]	7	11	27	0	2.0249e+07	1.80614e+06	2.98935e+07	0	11	2	14
9789937	DNAJA2	NOT_in_TF_list	dnaJ homolog subfamily A member 2 [Mus musculus]	9	9	12	0	1.11566e+07	0	1.14857e+07	0	6	0	6
391224478	MisMatch	NOT_in_TF_list	neuronal regeneration-related protein [Mus musculus]	1	1	1	0	0	0	0	0	0	0	1
119392066	GLYR1	NOT_in_TF_list	putative oxidoreductase GLYR1 isoform 2 [Mus musculus]	8	8	11	0	0	1.20129e+07	0	0	0	11	0
19527028	HDLBP	NOT_in_TF_list	vigilin [Mus musculus]	23	23	26	0	1.11519e+07	0	2.03576e+07	0	2	0	24
22003860	CD3EAP	NOT_in_TF_list	DNA-directed RNA polymerase I subunit RPA34 [Mus musculus]	7	7	14	0	1.13468e+07	0	1.14653e+07	0	6	0	8
12746442	EEFSEC	NOT_in_TF_list	selenocysteine-specific elongation factor [Mus musculus]	10	10	11	0	0	1.12171e+07	0	0	0	11	0
113195686	LMNB2	NOT_in_TF_list	lamin-B2 [Mus musculus]	10	11	11	0	0	3.93699e+06	0	0	0	11	0
28395023	NCKAP1	NOT_in_TF_list	nck-associated protein 1 [Mus musculus]	22	23	30	0	4.99369e+06	0	7.11276e+06	0	15	1	14
160837788	ARPC1B	NOT_in_TF_list	actin-related protein 2/3 complex subunit 1B [Mus musculus]	7	7	12	0	0	2.08573e+06	4.29887e+07	0	0	2	10
23956110	SNRPB2	NOT_in_TF_list	U2 small nuclear ribonucleoprotein B'' [Mus musculus]	4	6	10	5.92072e+06	0	42736185	0	2	0	8	0
21536218	LCE1M	NOT_in_TF_list	small proline rich-like 10 [Mus musculus]	1	1	1	0	0	0	0	0	1	0	0
283135190	CDC42BPB	NOT_in_TF_list	serine/threonine-protein kinase MRCK beta [Mus musculus]	31	31	40	0	0	0	2.9746e+07	0	0	0	40
227330598	FIP1L1	NOT_in_TF_list	pre-mRNA 3'-end-processing factor FIP1 isoform 3 [Mus musculus]	9	9	12	0	2.46126e+06	2.30568e+07	0	0	1	11	0
291463271	SMARCA4	NOT_in_TF_list	transcription activator BRG1 isoform 3 [Mus musculus]	17	34	65	0	1.9027e+06	0	4.13818e+07	0	8	1	56
14149647	RPL9	NOT_in_TF_list	60S ribosomal protein L9 [Mus musculus]	4	4	8	4.62297e+06	0	1.1034e+07	0	3	0	5	0
6754026	GNMT	NOT_in_TF_list	glycine N-methyltransferase [Mus musculus]	5	5	8	1.76667e+06	0	1.57208e+06	3.90979e+06	2	0	3	3
7657285	KRTAP5-4	NOT_in_TF_list	keratin-associated protein 5-4 [Mus musculus]	3	3	6	0	0	0	0	5	0	0	1
6755100	PA2G4	NOT_in_TF_list	proliferation-associated protein 2G4 [Mus musculus]	8	8	13	0	1.30205e+07	0	1.66586e+07	0	7	0	6
57527870	NMNAT1	NOT_in_TF_list	nicotinamide mononucleotide adenylyltransferase 1 [Mus musculus]	5	5	5	0	0	5.0276e+06	0	0	0	5	0
6753494	CORO1B	NOT_in_TF_list	coronin-1B [Mus musculus]	10	10	12	0	0	6.23704e+07	0	0	0	12	0
21704096	TARDBP	NOT_in_TF_list	TAR DNA-binding protein 43 isoform 1 [Mus musculus]	8	8	23	494634	3.68101e+07	0	3.1477e+07	1	8	0	14
19424352	MRPL16	NOT_in_TF_list	39S ribosomal protein L16, mitochondrial precursor [Mus musculus]	4	4	6	1.89289e+06	0	2.81635e+06	0	2	0	4	0
29789317	KRT75	NOT_in_TF_list	keratin, type II cytoskeletal 75 [Mus musculus]	1	20	172	8.65976e+08	9.91585e+08	9.18832e+08	3298721828	40	36	24	72
170295840	TRIM28	NOT_in_TF_list	transcription intermediary factor 1-beta [Mus musculus]	14	14	25	0	8.15581e+06	0	1.41564e+07	0	10	0	15
254587896	UGT2A3	NOT_in_TF_list	UDP-glucuronosyltransferase 2A3 precursor [Mus musculus]	7	10	22	0	1.24128e+07	1.5911e+06	1.31658e+07	0	11	1	10
254587960	PGAM5	NOT_in_TF_list	serine/threonine-protein phosphatase PGAM5, mitochondrial isoform 2 [Mus musculus]	7	7	7	0	0	8.64399e+06	0	0	0	7	0
153945866	SAFB2	NOT_in_TF_list	scaffold attachment factor B2 [Mus musculus]	14	16	24	0	4.31718e+06	1.0721e+06	2.07425e+07	0	1	1	22
160707945	SF1	NOT_in_TF_list	splicing factor 1 isoform 2 [Mus musculus]	9	9	17	0	553374	2.69102e+07	0	0	1	16	0
31981163	DDX18	NOT_in_TF_list	ATP-dependent RNA helicase DDX18 [Mus musculus]	13	13	17	0	860689	1.79994e+07	0	0	1	16	0
70887792	APTX	NOT_in_TF_list	aprataxin isoform b [Mus musculus]	6	6	17	0	1.68317e+07	0	1.52629e+07	0	9	0	8
88853578	AP1B1	NOT_in_TF_list	AP-1 complex subunit beta-1 isoform 2 [Mus musculus]	7	19	41	0	4.00335e+07	3.2682e+06	4.56851e+07	0	17	6	18
146219849	CTNND1	NOT_in_TF_list	catenin delta-1 isoform 3 [Mus musculus]	15	15	24	0	1.02915e+07	1.94531e+06	1.50564e+07	0	9	3	12
124358959	TAOK1	NOT_in_TF_list	serine/threonine-protein kinase TAO1 [Mus musculus]	17	21	30	0	3.91161e+07	0	3.20096e+07	0	15	1	14
20806532	CSDA	GeneID:8531	Y-box-binding protein 3 short isoform [Mus musculus]	1	5	8	0	1.43113e+07	0	8.49401e+06	0	5	0	3
124487289	A1CF	NOT_in_TF_list	APOBEC1 complementation factor [Mus musculus]	8	9	11	0	0	7.29298e+06	0	0	0	11	0
166706895	TOX4	GeneID:9878	TOX high mobility group box family member 4 [Mus musculus]	12	12	54	0	6.87319e+07	7.13586e+06	4.71147e+07	0	22	10	22
112421097	SMARCC1	GeneID:6599	SWI/SNF complex subunit SMARCC1 [Mus musculus]	11	20	39	0	7.65483e+06	0	5.24244e+07	0	4	0	35
29789289	ECHS1	NOT_in_TF_list	enoyl-CoA hydratase, mitochondrial precursor [Mus musculus]	5	5	9	951594	0	1.67472e+07	0	2	0	7	0
226443095	JRKL	NOT_in_TF_list	jerky protein homolog-like [Mus musculus]	8	8	9	0	0	6.85557e+06	0	0	0	9	0
39930559	RCOR1	NOT_in_TF_list	REST corepressor 1 [Mus musculus]	6	6	7	0	0	7.55537e+06	0	0	0	7	0
110625979	EEF1G	NOT_in_TF_list	elongation factor 1-gamma [Mus musculus]	9	9	16	0	8.48219e+06	0	1.18112e+07	0	6	1	9
31542626	HMBOX1	GeneID:79618	homeobox-containing protein 1 [Mus musculus]	7	8	19	0	1.75949e+07	1.81727e+07	6.53759e+06	0	8	6	5
225637487	ANPEP	NOT_in_TF_list	aminopeptidase N [Mus musculus]	15	15	20	0	0	0	2.00684e+07	0	2	0	18
145966692	KRT31	NOT_in_TF_list	keratin, type I cuticular Ha1 [Mus musculus]	5	11	44	7.57401e+08	2.2804e+09	1.04961e+09	3.33253e+09	27	3	3	11
30061327	HIST1H2AH	NOT_in_TF_list	histone H2A type 1-H [Mus musculus]	2	2	5	0	0	7.31815e+06	1.9624e+07	0	0	2	3
281427262	APLF	NOT_in_TF_list	aprataxin and PNK-like factor isoform 1 [Mus musculus]	6	6	7	0	0	1.18345e+07	0	0	0	7	0
42415475	P4HB	NOT_in_TF_list	protein disulfide-isomerase precursor [Mus musculus]	10	10	13	0	0	2.93528e+06	3.93735e+06	0	0	6	7
31981810	ECI1	NOT_in_TF_list	enoyl-CoA delta isomerase 1, mitochondrial precursor [Mus musculus]	5	5	6	0	0	1.47712e+07	0	0	0	6	0
121949821	ATF4	GeneID:468	cyclic AMP-dependent transcription factor ATF-4 [Mus musculus]	5	5	8	0	4.28102e+06	0	6.30184e+06	0	1	0	7
6755314	DPF2	NOT_in_TF_list	zinc finger protein ubi-d4 [Mus musculus]	7	7	15	0	4.14607e+07	0	4.13769e+07	0	8	0	7
117606322	SOX1	GeneID:6656	transcription factor SOX-1 [Mus musculus]	2	2	2	0	0	0	0	2	0	0	0
21539655	PRPF6	NOT_in_TF_list	pre-mRNA-processing factor 6 [Mus musculus]	21	21	29	0	1.29231e+07	0	1.35259e+07	0	11	1	17
110349752	FARP1	NOT_in_TF_list	FERM, RhoGEF and pleckstrin domain-containing protein 1 [Mus musculus]	18	19	32	0	1.42857e+07	588656	1.15119e+07	0	15	1	16
23956082	RPL5	NOT_in_TF_list	60S ribosomal protein L5 [Mus musculus]	6	6	6	0	0	0	8.18415e+06	0	0	0	6
31543974	YWHAB	NOT_in_TF_list	14-3-3 protein beta/alpha [Mus musculus]	1	6	12	5.06059e+06	0	2.57585e+07	2.29438e+06	2	0	8	2
237681154	ZFP281	NOT_in_TF_list	zinc finger protein 281 [Mus musculus]	12	12	15	0	2.96765e+06	453907	3.7006e+06	2	6	1	6
295317330	SNAP23	NOT_in_TF_list	synaptosomal-associated protein 23 isoform b [Mus musculus]	3	3	4	0	0	4.03753e+06	0	0	0	4	0
87252720	DHPS	NOT_in_TF_list	deoxyhypusine synthase [Mus musculus]	6	6	8	0	5.16879e+06	0	5.09514e+06	0	3	0	5
218931229	MBD2	NOT_in_TF_list	methyl-CpG-binding domain protein 2 [Mus musculus]	5	5	7	0	8.15705e+06	4.05078e+06	6.89271e+06	1	3	1	2
148747558	PRDX2	NOT_in_TF_list	peroxiredoxin-2 [Mus musculus]	4	4	6	5.51617e+06	0	4.21122e+06	1.07266e+07	2	0	3	1
70794816	GM5506	NOT_in_TF_list	uncharacterized protein LOC433182 [Mus musculus]	8	8	25	1.96563e+06	6.99336e+06	1.07779e+07	1.50358e+07	4	7	2	12
13386034	RPS13	NOT_in_TF_list	40S ribosomal protein S13 [Mus musculus]	3	3	7	2.5295e+06	1.53766e+06	1.44145e+06	1.53529e+06	3	1	1	2
126723461	CCT8	NOT_in_TF_list	T-complex protein 1 subunit theta [Mus musculus]	10	10	10	0	0	1.03378e+07	0	0	0	10	0
86198327	NOLC1	NOT_in_TF_list	nucleolar and coiled-body phosphoprotein 1 isoform B [Mus musculus]	21	21	100	1.59581e+06	3.15707e+08	5.1178e+07	1.33832e+08	1	43	23	33
85701628	BC026585	NOT_in_TF_list	quinone oxidoreductase-like protein 2 [Mus musculus]	4	4	6	0	0	0	6.90756e+06	0	0	0	6
6755198	PSMA6	NOT_in_TF_list	proteasome subunit alpha type-6 [Mus musculus]	4	4	5	1.34511e+06	0	3.15901e+06	0	1	0	4	0
6677819	RRAS	NOT_in_TF_list	ras-related protein R-Ras precursor [Mus musculus]	3	4	5	0	0	8.5653e+06	0	0	0	5	0
148747189	MTAP4	NOT_in_TF_list	microtubule-associated protein 4 isoform 2 [Mus musculus]	17	17	23	0	622126	0	1.33526e+07	0	2	0	21
124286785	RBPJ	GeneID:3516	recombining binding protein suppressor of hairless isoform 3 [Mus musculus]	8	8	8	0	0	1.85948e+07	0	0	0	8	0
67846113	SNRNP70	NOT_in_TF_list	U1 small nuclear ribonucleoprotein 70 kDa [Mus musculus]	12	12	20	0	4.32076e+06	1.44905e+07	2.64074e+06	0	6	11	3
84043961	EIF5B	NOT_in_TF_list	eukaryotic translation initiation factor 5B [Mus musculus]	18	18	26	0	1.78334e+06	316610	5.12932e+07	0	1	1	24
85861182	ALDH1A1	NOT_in_TF_list	retinal dehydrogenase 1 [Mus musculus]	7	8	15	0	4.86355e+06	1.76394e+06	1.40654e+07	0	5	2	8
6755907	TWIST1	GeneID:7291	twist-related protein 1 [Mus musculus]	1	1	1	0	0	0	0	1	0	0	0
20846986	GM4963	NOT_in_TF_list	PREDICTED: 40S ribosomal protein S25-like [Mus musculus]	3	3	6	4.13333e+06	2.12943e+06	7.46114e+06	0	1	2	3	0
68299824	MYO1E	NOT_in_TF_list	unconventional myosin-Ie [Mus musculus]	17	18	32	0	6.16717e+07	1.11903e+07	2.73218e+07	0	18	1	13
6753820	SRSF10	NOT_in_TF_list	serine/arginine-rich splicing factor 10 isoform 1 [Mus musculus]	3	3	7	0	4.20426e+06	4.83507e+06	6.9519e+06	0	2	3	2
242332572	IQGAP1	NOT_in_TF_list	ras GTPase-activating-like protein IQGAP1 [Mus musculus]	24	26	34	3.45953e+06	0	0	1.7389e+07	1	0	0	33
318101556	5430421N21RIK	NOT_in_TF_list	type II hair keratin [Mus musculus]	2	16	30	2.8661e+08	7.24077e+08	1.09362e+08	1.80449e+09	24	1	2	3
160358829	HPX	NOT_in_TF_list	hemopexin precursor [Mus musculus]	9	9	15	0	0	2.48501e+07	1.88865e+06	0	0	14	1
309262452	GM11703	NOT_in_TF_list	PREDICTED: 60S ribosomal protein L21-like [Mus musculus]	3	3	6	1.68346e+06	1.08823e+06	1.07476e+07	0	2	1	3	0
254675270	RPS5	NOT_in_TF_list	40S ribosomal protein S5 [Mus musculus]	3	3	4	0	0	1.06299e+06	0	0	0	4	0
63055065	SH3PXD2B	NOT_in_TF_list	SH3 and PX domain-containing protein 2B [Mus musculus]	15	15	25	0	1.59142e+07	1.37865e+06	2.4428e+07	0	9	1	15
14149756	EIF2S2	NOT_in_TF_list	eukaryotic translation initiation factor 2 subunit 2 [Mus musculus]	7	7	11	0	1.94034e+07	0	2.67953e+07	0	3	0	8
284413688	UGT1A6B	NOT_in_TF_list	UDP glucuronosyltransferase 1 family, polypeptide A6B precursor [Mus musculus]	2	9	24	0	3.39212e+07	3.12097e+06	3.00739e+07	0	13	3	8
27229118	METTL7B	NOT_in_TF_list	methyltransferase-like protein 7B precursor [Mus musculus]	5	5	5	0	0	3.17143e+06	0	0	0	5	0
18699998	CDK9	NOT_in_TF_list	cyclin-dependent kinase 9 [Mus musculus]	6	7	7	0	2.42281e+06	0	4.28151e+06	0	1	0	6
31980798	NXF1	NOT_in_TF_list	nuclear RNA export factor 1 isoform 1 [Mus musculus]	10	10	12	0	0	1.28644e+07	0	0	0	12	0
31981106	MOGS	NOT_in_TF_list	mannosyl-oligosaccharide glucosidase [Mus musculus]	13	13	33	0	1.78518e+07	2.34554e+06	1.32831e+07	0	15	2	16
75677563	KANK1	NOT_in_TF_list	KN motif and ankyrin repeat domain-containing protein 1 [Mus musculus]	19	22	53	1.66369e+06	5.69691e+06	1.55125e+06	4.44973e+07	2	6	2	43
27754134	RPL7L1	NOT_in_TF_list	60S ribosomal protein L7-like 1 [Mus musculus]	4	4	8	4.91752e+06	0	7.25424e+06	0	4	0	4	0
83627717	EIF4E	NOT_in_TF_list	eukaryotic translation initiation factor 4E [Mus musculus]	4	4	4	0	0	4.64449e+06	0	0	0	4	0
21313536	DLST	NOT_in_TF_list	dihydrolipoyllysine-residue succinyltransferase component of 2-oxoglutarate dehydrogenase complex, mitochondrial [Mus musculus]	8	8	14	0	1.21733e+07	6.64195e+06	7.36591e+06	0	5	6	3
30841014	EPB4.1L5	NOT_in_TF_list	band 4.1-like protein 5 isoform 1 [Mus musculus]	1	12	21	0	2.75257e+06	1.18821e+07	5.1047e+06	0	3	14	4
21426893	HIST1H1B	NOT_in_TF_list	histone H1.5 [Mus musculus]	3	5	9	0	347773	7.17921e+06	1.04141e+07	0	1	3	5
124486921	MOSC1	NOT_in_TF_list	MOSC domain-containing protein 1, mitochondrial [Mus musculus]	5	5	8	0	0	2.38941e+06	8.43374e+06	0	0	1	7
228008365	SLC27A5	NOT_in_TF_list	bile acyl-CoA synthetase precursor [Mus musculus]	11	11	15	0	0	1.74403e+07	1.81863e+06	0	0	12	3
33186906	UGT1A6A	NOT_in_TF_list	UDP-glucuronosyltransferase 1-6 precursor [Mus musculus]	2	9	23	0	3.39212e+07	3.12097e+06	3.00739e+07	0	12	3	8
188035919	GTF2H1	NOT_in_TF_list	general transcription factor IIH subunit 1 [Mus musculus]	8	8	9	0	0	3.23723e+06	0	0	0	9	0
31652268	INTS3	NOT_in_TF_list	integrator complex subunit 3 [Mus musculus]	17	17	30	233416	5.06534e+06	0	1.34424e+07	2	12	0	16
29611663	EXOSC4	NOT_in_TF_list	exosome complex component RRP41 [Mus musculus]	4	4	6	0	0	8.86831e+06	0	0	0	6	0
188219597	RFC1	NOT_in_TF_list	replication factor C subunit 1 [Mus musculus]	18	18	42	0	1.19182e+07	1.49866e+06	2.44149e+07	0	13	4	25
117647236	KHDRBS3	NOT_in_TF_list	KH domain-containing, RNA-binding, signal transduction-associated protein 3 [Mus musculus]	6	9	18	0	2.69677e+07	8.3e+07	1.48927e+07	0	8	4	6
226510365	RDH7	NOT_in_TF_list	retinol dehydrogenase 7 precursor [Mus musculus]	3	6	7	0	0	8.4115e+06	0	0	0	7	0
31980832	KRT85	NOT_in_TF_list	keratin, type II cuticular Hb5 [Mus musculus]	4	16	69	5.0453e+08	6.34681e+08	1.28101e+08	1.59413e+09	44	5	7	13
125656163	THOC2	NOT_in_TF_list	THO complex subunit 2 [Mus musculus]	27	28	63	0	6.95965e+06	373462	5.12335e+07	0	15	2	46
72535128	PXK	NOT_in_TF_list	PX domain-containing protein kinase-like protein short isoform [Mus musculus]	6	6	7	0	0	4.48181e+06	0	0	0	7	0
145699099	UGT1A1	NOT_in_TF_list	UDP-glucuronosyltransferase 1-1 precursor [Mus musculus]	6	10	34	0	3.39212e+07	3.41145e+06	3.17981e+07	0	17	4	13
269914157	KRT83	NOT_in_TF_list	keratin, type II cuticular Hb3 [Mus musculus]	1	15	26	2.62818e+08	5.62471e+08	1.09362e+08	1.80449e+09	19	2	2	3
20373163	SCRIB	NOT_in_TF_list	protein scribble homolog [Mus musculus]	20	20	26	0	2.038e+06	0	1.84932e+07	0	2	0	24
269914154	4732456N10RIK	NOT_in_TF_list	uncharacterized protein LOC239673 [Mus musculus]	1	18	140	5.69926e+08	7.3628e+08	4.00775e+08	1.36097e+09	46	28	17	49
256665245	CPSF7	NOT_in_TF_list	cleavage and polyadenylation specificity factor subunit 7 isoform 2 [Mus musculus]	8	8	13	0	2.04366e+06	4.20739e+06	3.33886e+06	0	3	5	5
113374154	SLC27A2	NOT_in_TF_list	very long-chain acyl-CoA synthetase [Mus musculus]	11	11	14	0	0	1.71489e+07	0	0	0	14	0
12963557	DMAP1	GeneID:55929	DNA methyltransferase 1-associated protein 1 [Mus musculus]	8	8	9	0	0	4.9055e+06	1.72013e+06	0	0	8	1
13385552	RPL39	NOT_in_TF_list	60S ribosomal protein L39 [Mus musculus]	1	1	1	1.2043e+07	0	0	0	1	0	0	0
309266232	GM5908	NOT_in_TF_list	PREDICTED: 60S ribosomal protein L27a-like [Mus musculus]	3	3	8	8.05312e+06	1.2572e+07	1.36807e+07	1.48729e+07	3	1	2	2
6680231	HMGB3	GeneID:3149	high mobility group protein B3 [Mus musculus]	3	3	4	0	0	2.87004e+07	0	0	0	4	0
254675300	NUMA1	NOT_in_TF_list	nuclear mitotic apparatus protein 1 [Mus musculus]	32	32	41	742649	367916	2.3956e+06	7.44546e+06	5	1	1	34
7106303	EHD1	NOT_in_TF_list	EH domain-containing protein 1 [Mus musculus]	9	9	10	0	0	5.22145e+06	0	0	0	10	0
82546826	FOXK1	GeneID:221937	forkhead box protein K1 [Mus musculus]	10	10	12	0	2.37443e+06	2.97876e+06	1.2147e+07	0	2	1	9
22779901	UGT2B1	NOT_in_TF_list	UDP-glucuronosyltransferase 2B4 precursor [Mus musculus]	6	9	22	0	1.81212e+07	2.79861e+06	2.76908e+07	0	12	1	9
94158994	API5	NOT_in_TF_list	apoptosis inhibitor 5 [Mus musculus]	9	9	15	0	757704	1.55631e+07	1.65446e+06	0	1	12	2
205361114	DNAJA3	NOT_in_TF_list	dnaJ homolog subfamily A member 3, mitochondrial isoform 2 [Mus musculus]	6	6	9	0	0	0	1.58971e+07	0	0	0	9
46399202	MYO5B	NOT_in_TF_list	unconventional myosin-Vb [Mus musculus]	26	26	27	0	577471	0	8.3604e+06	0	2	0	25
19526800	ERCC3	NOT_in_TF_list	TFIIH basal transcription factor complex helicase XPB subunit [Mus musculus]	12	12	18	0	1.08921e+07	0	1.05357e+07	0	11	0	7
30794470	RSL1D1	NOT_in_TF_list	ribosomal L1 domain-containing protein 1 [Mus musculus]	6	6	13	0	0	1.3592e+07	1.20758e+06	0	0	10	3
125347396	SMARCD1	NOT_in_TF_list	SWI/SNF-related matrix-associated actin-dependent regulator of chromatin subfamily D member 1 [Mus musculus]	5	7	12	0	0	1.43171e+07	1.8941e+06	1	0	9	2
51593084	SMARCA2	NOT_in_TF_list	probable global transcription activator SNF2L2 isoform 1 [Mus musculus]	11	28	51	0	1.79365e+06	0	4.12082e+07	0	5	0	46
31981251	2500003M10RIK	NOT_in_TF_list	chromatin target of PRMT1 protein [Mus musculus]	4	4	24	380268	8.4302e+06	3.98803e+07	1.02545e+07	1	5	10	8
22507391	PABPC4	NOT_in_TF_list	polyadenylate-binding protein 4 isoform 2 [Mus musculus]	3	9	10	0	0	2.84057e+07	0	0	0	10	0
20452466	FECH	NOT_in_TF_list	ferrochelatase, mitochondrial [Mus musculus]	7	7	7	0	1.9555e+06	0	4.55833e+06	0	3	0	4
6756039	YWHAQ	NOT_in_TF_list	14-3-3 protein theta [Mus musculus]	1	5	11	5.06059e+06	0	2.57585e+07	2.29438e+06	2	0	7	2
168480106	ZFR	NOT_in_TF_list	zinc finger RNA-binding protein [Mus musculus]	16	16	42	0	2.18286e+07	2.16531e+06	1.56317e+07	0	19	5	18
121674799	RNPS1	NOT_in_TF_list	RNA-binding protein with serine-rich domain 1 isoform 2 [Mus musculus]	3	3	5	0	8.01267e+06	0	5.18184e+06	0	2	0	3
124487321	WDR76	NOT_in_TF_list	WD repeat-containing protein 76 [Mus musculus]	8	8	8	0	0	4.02776e+06	0	0	0	8	0
31543694	SGPL1	NOT_in_TF_list	sphingosine-1-phosphate lyase 1 [Mus musculus]	9	9	14	0	7.68143e+06	0	5.53889e+06	0	7	0	7
19527030	KMO	NOT_in_TF_list	kynurenine 3-monooxygenase [Mus musculus]	9	9	13	0	1.13207e+07	0	7.05926e+06	0	7	0	6
268370040	WASL	NOT_in_TF_list	neural Wiskott-Aldrich syndrome protein isoform 1 [Mus musculus]	8	8	8	0	0	1.58673e+07	0	0	0	8	0
225543398	GTF2H2	NOT_in_TF_list	general transcription factor IIH subunit 2 [Mus musculus]	7	7	12	0	6.78574e+06	0	5.45237e+06	0	8	0	4
167614490	TBC1D10B	NOT_in_TF_list	TBC1 domain family member 10B [Mus musculus]	11	11	16	0	7.04051e+06	0	9.24462e+06	0	5	0	11
268836896	2810004N23RIK	NOT_in_TF_list	uncharacterized protein C1orf131 homolog [Mus musculus]	4	4	6	0	4.10037e+06	4.52816e+06	4.54465e+06	0	1	2	3
34996495	RPN2	NOT_in_TF_list	dolichyl-diphosphooligosaccharide--protein glycosyltransferase subunit 2 precursor [Mus musculus]	9	9	10	0	0	6.24724e+06	0	0	0	10	0
306774103	SRSF7	NOT_in_TF_list	serine/arginine-rich splicing factor 7 isoform 4 [Mus musculus]	4	5	5	0	0	5.40616e+06	5.57692e+06	0	0	2	3
21450205	WRAP53	NOT_in_TF_list	telomerase Cajal body protein 1 [Mus musculus]	6	6	8	0	1.8877e+06	1.29573e+07	0	0	1	7	0
111160869	TRA2A	NOT_in_TF_list	transformer-2 protein homolog alpha [Mus musculus]	3	3	5	0	0	0	858911	4	0	0	1
162329570	CAPRIN1	NOT_in_TF_list	caprin-1 isoform c [Mus musculus]	15	15	45	0	8.56531e+07	9.43001e+06	5.77866e+07	0	20	5	20
377833339	MisMatch	NOT_in_TF_list	PREDICTED: 60S ribosomal protein L29-like [Mus musculus]	3	3	7	3.89575e+06	0	6.6407e+06	2.90874e+06	2	0	3	2
21312960	PKP2	NOT_in_TF_list	plakophilin-2 [Mus musculus]	10	11	15	0	8.24282e+06	1.2819e+06	6194614	0	9	2	4
12963643	MRPL46	NOT_in_TF_list	39S ribosomal protein L46, mitochondrial [Mus musculus]	5	5	5	0	0	5.24017e+06	0	0	0	5	0
133930784	DTX3L	NOT_in_TF_list	E3 ubiquitin-protein ligase DTX3L [Mus musculus]	11	11	21	0	6.38076e+06	1.30269e+06	6.96057e+06	0	9	3	9
6753324	CCT6A	NOT_in_TF_list	T-complex protein 1 subunit zeta [Mus musculus]	7	7	7	0	0	7.12407e+06	0	0	0	7	0
309264022	LOC100505031	NOT_in_TF_list	PREDICTED: 40S ribosomal protein SA-like [Mus musculus]	4	4	5	0	7.96347e+06	0	2.15686e+06	0	3	0	2
18875392	RFXAP	NOT_in_TF_list	regulatory factor X-associated protein [Mus musculus]	3	3	3	0	0	0	1.79629e+06	0	0	0	3
188497724	HDGF	NOT_in_TF_list	hepatoma-derived growth factor [Mus musculus]	3	4	7	0	6.03245e+06	0	8.44139e+06	0	3	0	4
82898755	LOC638399	NOT_in_TF_list	PREDICTED: 60S ribosomal protein L31-like isoform 1 [Mus musculus]	2	2	3	1.40145e+06	0	2.81853e+06	0	1	0	2	0
13937391	GNB2	NOT_in_TF_list	guanine nucleotide-binding protein G(I)/G(S)/G(T) subunit beta-2 [Mus musculus]	7	7	9	0	0	0	3.29769e+07	0	0	0	9
255958286	SUCLG1	NOT_in_TF_list	succinyl-CoA ligase [ADP/GDP-forming] subunit alpha, mitochondrial precursor [Mus musculus]	5	5	11	0	0	0	1.7147e+07	0	0	0	11
254675193	DDX31	NOT_in_TF_list	DEAD/H (Asp-Glu-Ala-Asp/His) box polypeptide 31 [Mus musculus]	8	8	8	0	0	2.23316e+06	126190395	0	0	7	1
31559970	TMEM214	NOT_in_TF_list	transmembrane protein 214 [Mus musculus]	9	9	11	0	0	1.72544e+07	0	0	0	11	0
145966915	FLNB	NOT_in_TF_list	filamin-B [Mus musculus]	27	32	46	1.31324e+06	1.70672e+07	3.88642e+06	2.29266e+07	2	5	2	37
37059816	NAIF1	NOT_in_TF_list	nuclear apoptosis-inducing factor 1 [Mus musculus]	5	5	13	0	3.58407e+07	0	2.76911e+07	0	8	0	5
11177922	RFC2	NOT_in_TF_list	replication factor C subunit 2 [Mus musculus]	5	5	11	0	1.51714e+06	6.83438e+06	1.03962e+07	0	1	1	9
30794378	EXOSC6	NOT_in_TF_list	exosome complex component MTR3 [Mus musculus]	4	4	5	0	0	1.13023e+07	0	0	0	5	0
188219567	LYAR	NOT_in_TF_list	cell growth-regulating nucleolar protein [Mus musculus]	5	5	7	0	4.30222e+06	0	5.23428e+06	0	2	0	5
124028523	MTMR10	NOT_in_TF_list	myotubularin-related protein 10 [Mus musculus]	12	12	17	0	4.18722e+06	6.77817e+06	0	0	6	11	0
6756037	YWHAH	NOT_in_TF_list	14-3-3 protein eta [Mus musculus]	1	5	11	5.06059e+06	0	2.57585e+07	2.29438e+06	2	0	7	2
91176335	ACTR5	NOT_in_TF_list	actin-related protein 5 [Mus musculus]	9	9	9	0	0	7.51528e+06	1.47629e+06	0	0	8	1
7710096	SNTB1	NOT_in_TF_list	beta-1-syntrophin [Mus musculus]	6	8	13	0	2.64449e+06	7.52528e+06	7.29612e+06	0	1	10	2
165972315	RRAS2	NOT_in_TF_list	ras-related protein R-Ras2 precursor [Mus musculus]	2	3	4	0	0	6.34812e+06	0	0	0	4	0
226443099	SRBD1	NOT_in_TF_list	S1 RNA-binding domain-containing protein 1 [Mus musculus]	17	17	25	0	1.01131e+07	1.48309e+06	2.41656e+07	0	9	2	14
283806541	MTA3	GeneID:57504	metastasis-associated protein MTA3 isoform 4 [Mus musculus]	2	9	15	0	0	3.12284e+07	2.42599e+07	0	1	11	3
124487099	HNRNPUL2	NOT_in_TF_list	heterogeneous nuclear ribonucleoprotein U-like protein 2 [Mus musculus]	12	12	19	0	1.71547e+07	0	1.92466e+07	0	11	0	8
225543497	YTHDF3	NOT_in_TF_list	YTH domain family protein 3 isoform 2 [Mus musculus]	7	9	12	0	0	1.46723e+07	0	0	0	12	0
116325999	GSTA3	NOT_in_TF_list	glutathione S-transferase A3 [Mus musculus]	3	4	6	3.9816e+06	0	8.69938e+06	0	4	0	2	0
21312428	CDC42EP1	NOT_in_TF_list	cdc42 effector protein 1 [Mus musculus]	5	5	8	0	1.37886e+07	0	4.61604e+06	0	4	0	4
83816907	DNAJB6	NOT_in_TF_list	dnaJ homolog subfamily B member 6 isoform a [Mus musculus]	5	5	6	0	1.43599e+06	0	2.82789e+06	0	2	0	4
6680598	KPNA4	NOT_in_TF_list	importin subunit alpha-4 [Mus musculus]	7	7	9	0	3.02323e+06	2.49068e+07	7.02508e+06	0	1	7	1
257153362	BC030336	NOT_in_TF_list	uncharacterized protein C16orf52 homolog [Mus musculus]	1	1	1	0	0	1.34143e+07	0	0	0	1	0
6755358	RPL8	NOT_in_TF_list	60S ribosomal protein L8 [Mus musculus]	5	5	11	1.36692e+06	2.088e+06	3.31204e+07	0	2	1	8	0
31982393	EPHX2	NOT_in_TF_list	bifunctional epoxide hydrolase 2 isoform a [Mus musculus]	8	8	9	0	0	5.29972e+06	0	0	0	9	0
214010170	CLU	NOT_in_TF_list	clusterin precursor [Mus musculus]	5	5	6	0	9.11024e+06	1.68408e+06	692583	0	2	3	1
38372907	DDX39	NOT_in_TF_list	ATP-dependent RNA helicase DDX39A [Mus musculus]	2	8	14	0	9.24501e+06	0	8.85007e+06	0	6	0	8
20982845	FUS	NOT_in_TF_list	RNA-binding protein FUS [Mus musculus]	8	10	21	0	5.24182e+06	1.11294e+08	8.86334e+06	0	1	18	2
76677895	PUF60	NOT_in_TF_list	poly(U)-binding-splicing factor PUF60 isoform b [Mus musculus]	5	5	6	0	0	3.06221e+06	0	0	0	6	0
255308928	HIP1R	NOT_in_TF_list	huntingtin-interacting protein 1-related protein [Mus musculus]	14	15	19	0	4.67834e+06	0	7.03507e+06	0	8	0	11
21450323	HNRNPUL1	NOT_in_TF_list	heterogeneous nuclear ribonucleoprotein U-like protein 1 isoform 1 [Mus musculus]	12	13	17	0	3.52868e+07	0	3.86226e+06	0	13	0	4
58037251	9130008F23RIK	NOT_in_TF_list	uncharacterized protein LOC71583 [Mus musculus]	1	1	1	0	0	0	0	0	0	0	1
87080815	POLG	NOT_in_TF_list	DNA polymerase subunit gamma-1 [Mus musculus]	18	18	26	0	9.04559e+06	380746	6.04058e+06	0	13	1	12
6680606	KRT19	NOT_in_TF_list	keratin, type I cytoskeletal 19 [Mus musculus]	2	10	69	6.87772e+08	1.71022e+09	8.61408e+08	5.03985e+09	14	15	10	30
169790939	ARHGAP17	NOT_in_TF_list	rho GTPase-activating protein 17 isoform a [Mus musculus]	12	12	22	0	6.86772e+06	0	2.25774e+07	0	8	0	14
6678349	TIAL1	NOT_in_TF_list	nucleolysin TIAR [Mus musculus]	5	5	6	8.14784e+06	0	0	0	6	0	0	0
9910582	TEX101	NOT_in_TF_list	testis-expressed sequence 101 protein precursor [Mus musculus]	1	1	1	0	0	0	0	1	0	0	0
226823238	MAGI3	NOT_in_TF_list	membrane-associated guanylate kinase, WW and PDZ domain-containing protein 3 isoform 1 [Mus musculus]	20	20	26	0	941361	0	1.24866e+07	0	3	0	23
6755376	RPS7	NOT_in_TF_list	40S ribosomal protein S7 [Mus musculus]	2	2	2	0	0	5.96149e+06	0	0	0	2	0
124487251	TIGD2	NOT_in_TF_list	tigger transposable element-derived protein 2 [Mus musculus]	6	6	8	0	0	1.0862e+07	0	0	0	8	0
163954948	KHSRP	NOT_in_TF_list	far upstream element-binding protein 2 [Mus musculus]	8	10	19	724437	4.59425e+06	4.74761e+06	3.38391e+06	2	6	6	5
56699434	EIF4G1	NOT_in_TF_list	eukaryotic translation initiation factor 4 gamma 1 isoform b [Mus musculus]	25	25	35	224718	1.43293e+06	0	2.00523e+07	1	1	0	33
16751835	CPSF1	NOT_in_TF_list	cleavage and polyadenylation specificity factor subunit 1 isoform 2 [Mus musculus]	23	23	33	4.84268e+06	1.32148e+06	0	1.06957e+07	14	1	0	18
6754508	LASP1	NOT_in_TF_list	LIM and SH3 domain protein 1 [Mus musculus]	4	4	7	0	4.51342e+06	0	2.47991e+06	0	2	0	5
51092303	GM5409	NOT_in_TF_list	Try10-like trypsinogen precursor [Mus musculus]	3	3	73	6.89545e+08	4.28087e+08	3.36126e+08	1.01546e+10	17	12	18	26
28076889	YIPF4	NOT_in_TF_list	protein YIPF4 [Mus musculus]	1	1	1	0	0	0	0	1	0	0	0
124430766	UHRF2	NOT_in_TF_list	E3 ubiquitin-protein ligase UHRF2 [Mus musculus]	12	12	16	0	1.33525e+07	1.10669e+06	8.86506e+06	0	6	1	9
28202007	METAP1	NOT_in_TF_list	methionine aminopeptidase 1 [Mus musculus]	6	6	10	0	1.00177e+07	0	1.1308e+07	0	5	0	5
36031035	SMC3	NOT_in_TF_list	structural maintenance of chromosomes protein 3 [Mus musculus]	17	17	27	0	3.76671e+06	0	8.03901e+06	0	9	0	18
134053922	1110002N22RIK	NOT_in_TF_list	transcription elongation factor, mitochondrial [Mus musculus]	6	6	7	0	0	1.1422e+06	8.38124e+06	0	0	1	6
34536827	GPAM	NOT_in_TF_list	glycerol-3-phosphate acyltransferase 1, mitochondrial [Mus musculus]	11	11	18	0	6.74003e+06	0	7.59562e+06	0	10	1	7
139948818	FAM98A	NOT_in_TF_list	protein FAM98A [Mus musculus]	4	6	15	0	5.96269e+06	1.2785e+07	7.68992e+06	0	2	9	4
6679034	NEDD8	NOT_in_TF_list	NEDD8 precursor [Mus musculus]	1	1	2	0	1.36824e+06	0	787613	0	1	0	1
407262909	MisMatch	NOT_in_TF_list	PREDICTED: 40S ribosomal protein S6-like [Mus musculus]	4	4	19	1.42112e+07	5.90347e+06	3.64612e+07	2.75682e+06	6	3	7	3
260166713	UBAP2L	NOT_in_TF_list	ubiquitin-associated protein 2-like isoform 5 [Mus musculus]	10	10	16	0	3.19728e+06	755953	1.94867e+07	0	4	1	11
31980904	CPSF3	NOT_in_TF_list	cleavage and polyadenylation specificity factor subunit 3 [Mus musculus]	11	11	11	0	0	1.42461e+07	0	0	0	11	0
158937312	HSPB1	NOT_in_TF_list	heat shock protein beta-1 [Mus musculus]	3	3	3	0	691690	3.02255e+06	0	0	1	2	0
166295202	HNF1A	GeneID:6927	hepatocyte nuclear factor 1-alpha [Mus musculus]	7	8	19	0	2.57179e+07	1.63163e+07	9.34701e+06	0	8	8	3
224922828	RBM42	NOT_in_TF_list	RNA-binding protein 42 [Mus musculus]	6	6	7	1.14959e+06	0	2.62102e+06	0	4	0	3	0
227116266	EXOSC10	NOT_in_TF_list	exosome component 10 [Mus musculus]	12	12	15	0	3.97498e+06	0	4.65784e+06	0	6	0	9
6756049	ZFP148	GeneID:7707	zinc finger protein 148 [Mus musculus]	11	11	19	0	8.99612e+06	2.6377e+06	1.10863e+07	0	8	2	9
164450487	RBBP5	NOT_in_TF_list	retinoblastoma-binding protein 5 [Mus musculus]	9	9	10	0	306418	1.11648e+07	0	0	1	9	0
134031994	PSMA2	NOT_in_TF_list	proteasome subunit alpha type-2 [Mus musculus]	2	2	3	0	0	637481	533381	0	0	1	2
13385472	RPL14	NOT_in_TF_list	60S ribosomal protein L14 [Mus musculus]	3	3	11	1.38793e+06	7.61029e+06	6.79796e+07	760679	1	1	8	1
449083347	MisMatch	NOT_in_TF_list	fibronectin isoform g precursor [Mus musculus]	28	28	29	0	0	0	1.25286e+07	0	0	0	29
6753176	BCL7C	NOT_in_TF_list	B-cell CLL/lymphoma 7 protein family member C [Mus musculus]	2	2	3	0	8.69226e+06	0	1.90045e+07	0	1	0	2
12328816	POLR1E	NOT_in_TF_list	DNA-directed RNA polymerase I subunit RPA49 [Mus musculus]	7	7	10	0	9.47055e+06	0	1.576e+07	0	4	0	6
124248552	ASH2L	NOT_in_TF_list	set1/Ash2 histone methyltransferase complex subunit ASH2 isoform a [Mus musculus]	7	7	8	0	0	7.40865e+06	0	0	0	8	0
13386120	NHP2	NOT_in_TF_list	H/ACA ribonucleoprotein complex subunit 2 [Mus musculus]	2	2	3	0	6.79907e+06	1.30181e+07	0	0	1	2	0
9845295	RPL36A	NOT_in_TF_list	60S ribosomal protein L36a [Mus musculus]	2	2	2	4.97004e+06	0	0	0	2	0	0	0
247269929	CES1C	NOT_in_TF_list	carboxylesterase 1C precursor [Mus musculus]	8	9	11	0	0	1.17899e+07	0	0	0	11	0
21703896	IFI27L2B	NOT_in_TF_list	interferon alpha-inducible protein 27-like protein 2B precursor [Mus musculus]	1	1	2	0	0	0	0	2	0	0	0
86604728	AKIRIN2	NOT_in_TF_list	akirin-2 [Mus musculus]	1	1	1	0	0	0	0	1	0	0	0
91932791	TRIP12	NOT_in_TF_list	E3 ubiquitin-protein ligase TRIP12 [Mus musculus]	26	26	31	0	0	6.92956e+06	1.55431e+07	0	1	3	27
6680618	ACADM	NOT_in_TF_list	medium-chain specific acyl-CoA dehydrogenase, mitochondrial precursor [Mus musculus]	7	7	11	0	4.40964e+06	0	4.29317e+06	0	6	0	5
160333504	KRT33A	NOT_in_TF_list	keratin, type I cuticular Ha3-I [Mus musculus]	2	7	27	2.01313e+08	0	0	1.23863e+07	22	0	0	5
162287142	CPT1A	NOT_in_TF_list	carnitine O-palmitoyltransferase 1, liver isoform [Mus musculus]	11	11	14	0	8.48839e+06	6.19659e+06	1.57619e+06	0	2	10	2
7549752	CUL1	NOT_in_TF_list	cullin-1 [Mus musculus]	11	11	15	0	4.91036e+06	2.43462e+06	2.15556e+06	0	6	8	1
9507003	PTBP2	NOT_in_TF_list	polypyrimidine tract-binding protein 2 [Mus musculus]	5	7	38	1.23454e+08	4.67983e+07	1.0999e+07	9.27126e+07	11	11	6	10
117606214	XRN2	NOT_in_TF_list	5'-3' exoribonuclease 2 [Mus musculus]	12	12	15	0	9.49518e+06	0	7.41979e+06	0	8	0	7
40789094	ZHX2	GeneID:22882	zinc fingers and homeoboxes protein 2 [Mus musculus]	10	10	17	0	1.24266e+07	1.13877e+07	1.19054e+07	0	11	2	4
85701680	KRT76	NOT_in_TF_list	keratin, type II cytoskeletal 2 oral [Mus musculus]	3	15	122	3.48141e+08	7.47917e+08	1.06325e+09	1.55597e+09	28	24	19	51
86439984	SFXN2	NOT_in_TF_list	sideroflexin-2 [Mus musculus]	4	4	6	555863	0	3.56943e+06	0	1	0	5	0
75677516	C77080	NOT_in_TF_list	uncharacterized protein KIAA1522 [Mus musculus]	13	13	15	0	0	0	8.39347e+06	0	0	0	15
6677697	RDH16	NOT_in_TF_list	retinol dehydrogenase 16 [Mus musculus]	1	4	5	0	0	4.7285e+06	0	0	0	5	0
16716569	PRSS1	NOT_in_TF_list	protease, serine, 1 precursor [Mus musculus]	2	3	35	3.37685e+09	5830623872	4.81361e+09	2.31863e+10	7	6	9	13
6753164	BCKDK	NOT_in_TF_list	[3-methyl-2-oxobutanoate dehydrogenase [lipoamide]] kinase, mitochondrial precursor [Mus musculus]	5	5	9	0	2.16538e+06	0	9.21021e+06	0	5	0	4
13195628	CSTF1	NOT_in_TF_list	cleavage stimulation factor subunit 1 [Mus musculus]	5	5	7	0	3.68628e+06	0	6.57505e+06	0	5	0	2
9506945	PABPN1	NOT_in_TF_list	polyadenylate-binding protein 2 [Mus musculus]	4	4	8	0	4.55337e+07	0	3.58425e+07	0	4	0	4
440546408	MisMatch	NOT_in_TF_list	protein numb homolog isoform 3 [Mus musculus]	9	9	11	0	0	1.21424e+07	0	0	0	11	0
71037397	RFX5	GeneID:5993	DNA-binding protein Rfx5 [Mus musculus]	10	10	11	0	0	9.31826e+06	0	0	0	11	0
51092293	KRT77	NOT_in_TF_list	keratin, type II cytoskeletal 1b [Mus musculus]	4	14	97	1.93132e+09	1.34224e+09	1.70421e+09	3.92261e+09	27	18	16	36
85861226	GRTP1	NOT_in_TF_list	growth hormone-regulated TBC protein 1 [Mus musculus]	4	4	5	0	5.22651e+06	0	7.07758e+06	0	1	0	4
19527078	FGG	NOT_in_TF_list	fibrinogen gamma chain precursor [Mus musculus]	5	5	7	0	2.69545e+07	0	2.20507e+06	0	5	0	2
83921618	EZR	NOT_in_TF_list	ezrin [Mus musculus]	1	9	15	0	0	5.34675e+07	4.14065e+06	0	0	13	2
170650651	2310022A10RIK	NOT_in_TF_list	uncharacterized protein C19orf47 homolog isoform 1 [Mus musculus]	4	4	7	0	1.60931e+06	1.50996e+06	1.53403e+06	0	3	1	3
58037117	NDUFS3	NOT_in_TF_list	NADH dehydrogenase [ubiquinone] iron-sulfur protein 3, mitochondrial precursor [Mus musculus]	4	4	5	507210	0	4.54605e+06	1.02467e+06	1	0	3	1
19527214	APON	NOT_in_TF_list	apolipoprotein N precursor [Mus musculus]	1	1	2	0	0	0	6.29855e+06	0	0	0	2
31982833	PIP5K1A	NOT_in_TF_list	phosphatidylinositol 4-phosphate 5-kinase type-1 alpha [Mus musculus]	5	5	5	0	0	4.51728e+06	0	1	0	4	0
21313138	GSTK1	NOT_in_TF_list	glutathione S-transferase kappa 1 [Mus musculus]	3	3	3	0	0	1.21475e+06	0	0	0	3	0
11528498	TAF8	NOT_in_TF_list	transcription initiation factor TFIID subunit 8 [Mus musculus]	3	3	4	0	2.90015e+06	0	0	0	2	0	2
6755963	VDAC1	NOT_in_TF_list	voltage-dependent anion-selective channel protein 1 [Mus musculus]	4	4	4	0	0	4.00377e+06	0	1	0	3	0
8393762	CPSF2	NOT_in_TF_list	cleavage and polyadenylation specificity factor subunit 2 [Mus musculus]	11	11	17	0	7.46502e+06	610088	8.51556e+06	0	8	2	7
270309153	MEN1	NOT_in_TF_list	menin isoform c [Mus musculus]	7	7	7	0	0	7.77238e+06	0	0	0	7	0
83921581	PSD3	NOT_in_TF_list	PH and SEC7 domain-containing protein 3 isoform 1 [Mus musculus]	7	7	9	0	934143	0	5.36596e+06	0	1	0	8
258547116	CYFIP1	NOT_in_TF_list	cytoplasmic FMR1-interacting protein 1 isoform a [Mus musculus]	19	19	26	0	6.91811e+06	0	8.61862e+06	0	11	0	15
6678215	TAF6	NOT_in_TF_list	transcription initiation factor TFIID subunit 6 [Mus musculus]	8	8	11	0	0	6.88819e+06	6.76927e+06	0	0	10	1
68533246	THRAP3	NOT_in_TF_list	thyroid hormone receptor-associated protein 3 [Mus musculus]	13	13	23	0	3.01796e+06	1.06203e+06	1.66157e+07	0	4	2	17
190014629	TPRN	NOT_in_TF_list	taperin [Mus musculus]	8	8	11	0	8.41384e+06	159266	4.08897e+06	0	5	1	5
357394970	MisMatch	NOT_in_TF_list	phosphatidylinositol-binding clathrin assembly protein isoform 6 [Mus musculus]	7	7	8	0	0	9.93576e+06	0	0	0	8	0
40254249	NFRKB	GeneID:4798	nuclear factor related to kappa-B-binding protein [Mus musculus]	13	13	15	0	0	0	6.96822e+06	0	0	0	15
189339272	BAZ1A	NOT_in_TF_list	bromodomain adjacent to zinc finger domain protein 1A [Mus musculus]	19	19	21	0	0	0	2.43252e+07	0	0	0	21
295390525	ASPH	NOT_in_TF_list	aspartyl/asparaginyl beta-hydroxylase isoform 3 [Mus musculus]	7	7	8	0	2.61307e+06	0	4.90935e+06	0	2	1	5
13385168	UQCRFS1	NOT_in_TF_list	cytochrome b-c1 complex subunit Rieske, mitochondrial [Mus musculus]	3	3	4	0	0	4.20908e+06	0	0	0	4	0
13385798	DCTN4	NOT_in_TF_list	dynactin subunit 4 [Mus musculus]	6	6	9	0	3.0165e+06	6.60119e+06	3.79431e+06	0	1	6	2
6678305	TFDP1	GeneID:7027	transcription factor Dp-1 [Mus musculus]	4	4	7	0	3.14627e+06	0	5.86271e+06	0	3	0	4
34328286	SDHB	NOT_in_TF_list	succinate dehydrogenase [ubiquinone] iron-sulfur subunit, mitochondrial precursor [Mus musculus]	4	4	5	0	0	1.26419e+07	0	0	0	5	0
407262235	MisMatch	NOT_in_TF_list	PREDICTED: adenosylhomocysteinase-like [Mus musculus]	3	3	8	367296	2.6282e+06	0	3.95722e+06	3	2	0	3
6753426	CISH	NOT_in_TF_list	cytokine-inducible SH2-containing protein [Mus musculus]	1	1	1	0	0	0	89047383	0	0	0	1
23956084	ACADVL	NOT_in_TF_list	very long-chain specific acyl-CoA dehydrogenase, mitochondrial precursor [Mus musculus]	7	7	8	0	0	4.53154e+06	0	0	0	8	0
161760634	LYN	NOT_in_TF_list	tyrosine-protein kinase Lyn isoform B [Mus musculus]	5	6	7	0	4.93636e+06	1.75271e+06	2.5144e+06	0	5	1	1
13385958	RPS27L	NOT_in_TF_list	40S ribosomal protein S27-like [Mus musculus]	1	1	2	0	569062	1.52038e+06	0	0	1	1	0
241896974	PUSL1	NOT_in_TF_list	tRNA pseudouridine synthase-like 1 [Mus musculus]	3	3	4	688784	0	1.41948e+06	0	3	0	1	0
86991442	LIN7A	NOT_in_TF_list	protein lin-7 homolog A isoform 1 [Mus musculus]	3	3	3	0	0	3.42141e+06	0	0	0	3	0
267844920	WBP11	NOT_in_TF_list	WW domain-binding protein 11 [Mus musculus]	9	9	13	0	6.59955e+06	800930	4.41908e+06	0	6	1	6
411147387	MisMatch	NOT_in_TF_list	tyrosine--tRNA ligase, cytoplasmic [Mus musculus]	9	9	11	0	0	7.7016e+06	2.23943e+06	0	0	8	3
309263233	GM3362	NOT_in_TF_list	PREDICTED: 60S ribosomal protein L23a-like [Mus musculus]	2	2	5	5.15041e+06	919205	6.46427e+06	0	2	1	2	0
13195646	CRIP2	NOT_in_TF_list	cysteine-rich protein 2 [Mus musculus]	1	1	1	0	0	3.07632e+06	0	0	0	1	0
33563288	CCAR1	NOT_in_TF_list	cell division cycle and apoptosis regulator protein 1 [Mus musculus]	14	14	24	0	2.26147e+06	0	2.67955e+07	0	2	0	22
63999399	C1QTNF9	NOT_in_TF_list	complement C1q and tumor necrosis factor-related protein 9 precursor [Mus musculus]	1	1	1	0	0	0	0	1	0	0	0
169790818	DAZAP1	NOT_in_TF_list	DAZ-associated protein 1 isoform a [Mus musculus]	4	4	6	5.25098e+06	6.48185e+06	0	1.00918e+07	2	1	0	3
67906179	FERMT2	NOT_in_TF_list	fermitin family homolog 2 [Mus musculus]	6	6	8	0	0	2.61886e+06	0	0	2	6	0
116268115	AUH	NOT_in_TF_list	methylglutaconyl-CoA hydratase, mitochondrial precursor [Mus musculus]	4	4	6	4.24771e+06	0	9.26202e+06	0	2	0	4	0
256355182	MINA	NOT_in_TF_list	bifunctional lysine-specific demethylase and histidyl-hydroxylase MINA [Mus musculus]	5	5	7	0	4.8685e+06	0	5.89957e+06	0	4	0	3
33239431	RCC2	NOT_in_TF_list	protein RCC2 [Mus musculus]	7	7	7	0	3.47295e+06	0	3.35632e+06	0	3	0	4
21313623	GTPBP8	NOT_in_TF_list	GTP-binding protein 8 isoform 1 [Mus musculus]	3	3	3	0	0	804762	0	0	0	3	0
19526848	MOSC2	NOT_in_TF_list	MOSC domain-containing protein 2, mitochondrial precursor [Mus musculus]	5	5	6	0	0	421322	1.31774e+07	0	0	1	5
13385598	SNRPD3	NOT_in_TF_list	small nuclear ribonucleoprotein Sm D3 [Mus musculus]	2	2	2	0	0	3.95022e+06	0	0	0	2	0
188497701	RBM47	NOT_in_TF_list	RNA-binding protein 47 [Mus musculus]	4	5	5	0	0	7.24527e+06	0	0	0	5	0
163644247	CLASP1	NOT_in_TF_list	CLIP-associating protein 1 isoform 3 [Mus musculus]	19	19	26	0	806433	0	9.09203e+06	0	1	0	25
51467749	INTS6	NOT_in_TF_list	integrator complex subunit 6 [Mus musculus]	13	13	16	458878	4.06651e+06	0	6.47737e+06	1	5	0	10
171543897	PARP12	NOT_in_TF_list	poly [ADP-ribose] polymerase 12 [Mus musculus]	10	10	10	0	0	7.4082e+06	0	0	0	10	0
23956406	UGT2B34	NOT_in_TF_list	UDP-glucuronosyltransferase 2B10 precursor [Mus musculus]	4	7	13	0	1.13883e+07	0	1.40171e+07	0	8	0	5
114205431	ABCE1	NOT_in_TF_list	ATP-binding cassette sub-family E member 1 [Mus musculus]	8	8	8	0	0	1.74129e+07	0	0	0	8	0
429484484	MisMatch	NOT_in_TF_list	peroxisomal acyl-coenzyme A oxidase 1 isoform 2 [Mus musculus]	6	6	6	0	4.34437e+06	0	1.76755e+06	0	3	0	3
7106387	PSMA5	NOT_in_TF_list	proteasome subunit alpha type-5 [Mus musculus]	3	3	6	1.3258e+06	0	2.42041e+06	0	2	0	3	1
112293262	ESRRA	GeneID:2101	steroid hormone receptor ERR1 [Mus musculus]	4	4	5	0	5.84671e+06	0	3.87535e+06	0	2	0	3
124487309	PHF3	NOT_in_TF_list	PHD finger protein 3 [Mus musculus]	22	22	30	0	1.18151e+07	8.72405e+06	1.76192e+07	0	1	1	28
170784811	UPF1	NOT_in_TF_list	regulator of nonsense transcripts 1 isoform b [Mus musculus]	15	15	21	0	4.36923e+06	0	4.78391e+06	0	9	0	12
114842377	STRBP	NOT_in_TF_list	spermatid perinuclear RNA-binding protein [Mus musculus]	8	10	12	0	7.75714e+06	6.43703e+06	1.1012e+07	0	1	10	1
94721328	VAPA	NOT_in_TF_list	vesicle-associated membrane protein-associated protein A [Mus musculus]	3	4	6	0	0	5.23889e+06	0	0	0	6	0
47271535	SRP68	NOT_in_TF_list	signal recognition particle subunit SRP68 [Mus musculus]	7	7	7	0	0	2.64574e+06	0	0	0	7	0
21703976	DAK	NOT_in_TF_list	bifunctional ATP-dependent dihydroxyacetone kinase/FAD-AMP lyase (cyclizing) [Mus musculus]	6	6	6	0	0	5.41789e+06	0	0	0	6	0
160333753	KANK2	NOT_in_TF_list	KN motif and ankyrin repeat domain-containing protein 2 [Mus musculus]	8	11	21	978352	5.13977e+06	0	1.79911e+07	1	8	0	12
124487354	TAF4A	NOT_in_TF_list	transcription initiation factor TFIID subunit 4 [Mus musculus]	9	10	15	0	6.52424e+06	0	5.09784e+06	0	5	0	10
21450259	MisMatch	NOT_in_TF_list	exosome complex component RRP4 [Mus musculus]	3	3	4	454054	0	8.82277e+06	0	1	0	3	0
145587092	MLLT4	NOT_in_TF_list	afadin [Mus musculus]	19	19	26	0	1.63344e+06	1.02103e+07	1.15694e+07	0	1	2	23
407262172	MisMatch	NOT_in_TF_list	PREDICTED: serine/arginine-rich splicing factor 3-like [Mus musculus]	1	2	2	0	0	8.97865e+06	0	0	0	2	0
254588045	PPFIBP2	NOT_in_TF_list	liprin-beta-2 isoform 1 [Mus musculus]	8	10	17	0	9.80389e+06	0	1.23443e+07	0	8	0	9
225007627	NOSTRIN	NOT_in_TF_list	nostrin [Mus musculus]	7	7	7	0	0	9.91316e+06	0	0	0	7	0
118026904	NOL6	NOT_in_TF_list	nucleolar protein 6 [Mus musculus]	11	11	17	0	4.3295e+07	0	5.05259e+06	0	10	0	7
294979205	WIZ	GeneID:58525	protein Wiz isoform 1 [Mus musculus]	11	11	14	0	9.30271e+06	0	8.50966e+06	0	8	0	6
149268895	GM4705	NOT_in_TF_list	PREDICTED: 60S ribosomal protein L34-like [Mus musculus]	2	2	5	1.41036e+06	571688	3.29431e+06	0	2	1	2	0
118601004	PRODH	NOT_in_TF_list	proline dehydrogenase 1, mitochondrial precursor [Mus musculus]	6	6	8	0	0	5.13001e+06	6.24315e+06	0	0	7	1
30524920	GNL3	NOT_in_TF_list	guanine nucleotide-binding protein-like 3 long isoform [Mus musculus]	7	7	8	0	0	8.9958e+06	0	0	0	8	0
46402169	MRPS26	NOT_in_TF_list	28S ribosomal protein S26, mitochondrial precursor [Mus musculus]	2	2	2	0	0	715704	0	0	0	2	0
13385658	MRPL10	NOT_in_TF_list	39S ribosomal protein L10, mitochondrial precursor [Mus musculus]	2	2	2	0	0	4.59173e+06	0	0	0	2	0
16418339	RPL10	NOT_in_TF_list	60S ribosomal protein L10 [Mus musculus]	3	3	11	5.43612e+06	0	6.91003e+06	509037	4	0	6	1
407261812	MisMatch	NOT_in_TF_list	PREDICTED: uncharacterized protein LOC101056470 [Mus musculus]	1	1	1	0	0	0	0	1	0	0	0
19527322	LETMD1	NOT_in_TF_list	LETM1 domain-containing protein 1 [Mus musculus]	4	4	4	0	0	2.78113e+06	0	0	0	4	0
190194418	DSP	NOT_in_TF_list	desmoplakin [Mus musculus]	43	43	112	1.67788e+07	7.88288e+06	1.19053e+07	5.6702e+07	30	8	22	52
166063974	TLK2	NOT_in_TF_list	serine/threonine-protein kinase tousled-like 2 isoform A [Mus musculus]	5	10	15	0	3.89999e+06	3.06451e+06	4.56002e+06	0	6	5	4
6680690	PRDX3	NOT_in_TF_list	thioredoxin-dependent peroxide reductase, mitochondrial precursor [Mus musculus]	3	3	3	0	0	1.27799e+06	0	0	0	3	0
29244484	VPS37B	NOT_in_TF_list	vacuolar protein sorting-associated protein 37B [Mus musculus]	1	1	1	0	0	0	0	1	0	0	0
158966704	RPS16	NOT_in_TF_list	40S ribosomal protein S16 [Mus musculus]	2	2	5	1.91532e+06	3.32547e+06	2.57706e+06	647586	1	1	2	1
288541337	AIMP2	NOT_in_TF_list	aminoacyl tRNA synthase complex-interacting multifunctional protein 2 isoform 1 [Mus musculus]	3	3	4	0	0	103081	1.52122e+06	0	0	2	2
229577283	UCHL5	NOT_in_TF_list	ubiquitin carboxyl-terminal hydrolase isozyme L5 isoform 2 [Mus musculus]	4	4	4	0	0	0	5.03959e+06	0	0	0	4
407262563	MisMatch	NOT_in_TF_list	PREDICTED: nucleoside diphosphate kinase A-like [Mus musculus]	1	1	1	0	0	0	1.55598e+06	0	0	0	1
30466247	CPSF4	NOT_in_TF_list	cleavage and polyadenylation specificity factor subunit 4 [Mus musculus]	2	2	4	641086	0	5.75793e+06	0	1	0	3	0
410025486	MisMatch	NOT_in_TF_list	flap endonuclease 1 [Mus musculus]	4	4	5	0	5.41185e+06	0	5.10447e+06	0	1	0	4
13385298	LONP2	NOT_in_TF_list	lon protease homolog 2, peroxisomal isoform 1 [Mus musculus]	9	9	11	0	2.69704e+06	751435	3.95968e+06	0	4	1	6
6678824	MCL1	NOT_in_TF_list	induced myeloid leukemia cell differentiation protein Mcl-1 homolog [Mus musculus]	1	1	1	0	0	0	0	1	0	0	0
154146185	LRRC16A	NOT_in_TF_list	leucine-rich repeat-containing protein 16A [Mus musculus]	16	16	17	0	0	0	9.30963e+06	0	0	0	17
161169031	RUNX1	GeneID:861	runt-related transcription factor 1 isoform 3 [Mus musculus]	4	4	4	0	2.49063e+06	0	1.22304e+06	0	3	0	1
13385134	SPCS2	NOT_in_TF_list	signal peptidase complex subunit 2 [Mus musculus]	1	1	1	0	0	0	0	1	0	0	0
21313424	DRAP1	GeneID:10589	dr1-associated corepressor [Mus musculus]	3	3	3	0	0	9.9312e+06	0	0	0	3	0
356995919	MisMatch	NOT_in_TF_list	disks large homolog 1 isoform 3 [Mus musculus]	9	9	12	0	4.64343e+06	0	1.05589e+07	0	3	0	9
31543847	TCEB3	NOT_in_TF_list	transcription elongation factor B polypeptide 3 [Mus musculus]	11	11	14	0	2.69922e+06	0	1.06727e+07	0	5	0	9
34304038	2210020M01RIK	NOT_in_TF_list	small integral membrane protein 5 [Mus musculus]	1	1	1	0	0	0	2.42547e+06	0	0	0	1
34328471	RALA	NOT_in_TF_list	ras-related protein Ral-A precursor [Mus musculus]	2	2	2	0	0	1.81255e+06	0	0	0	2	0
88014720	KPNB1	NOT_in_TF_list	importin subunit beta-1 [Mus musculus]	9	9	14	0	8.24138e+06	0	6.02926e+06	0	6	0	8
126352391	ZFP384	GeneID:171017	zinc finger protein 384 isoform 1 [Mus musculus]	5	5	8	0	0	4.83534e+06	1.87774e+06	0	0	7	1
26986555	MYL6B	NOT_in_TF_list	myosin light chain 6B [Mus musculus]	1	2	8	1.57527e+06	3.43001e+07	1.052e+08	8.11115e+07	1	2	3	2
160948575	TERF2IP	GeneID:54386	telomeric repeat-binding factor 2-interacting protein 1 [Mus musculus]	4	4	10	0	4.93669e+06	5.61524e+06	4.35664e+06	0	4	3	3
22095003	SF3A3	NOT_in_TF_list	splicing factor 3A subunit 3 [Mus musculus]	7	7	8	0	0	1.23844e+07	3.83303e+06	0	0	7	1
327180734	DNMT1	NOT_in_TF_list	DNA (cytosine-5)-methyltransferase 1 isoform 2 [Mus musculus]	17	18	23	0	2.26089e+06	607740	1.62844e+07	0	2	1	20
71274184	UGT2B36	NOT_in_TF_list	UDP glucuronosyltransferase 2 family, polypeptide B36 precursor [Mus musculus]	4	7	18	0	1.4136e+07	2.79861e+06	2.31015e+07	0	8	1	9
29789253	MRPL9	NOT_in_TF_list	39S ribosomal protein L9, mitochondrial [Mus musculus]	3	3	3	0	0	2.30162e+06	0	0	0	3	0
117959928	GNAS	NOT_in_TF_list	protein GNAS isoform GNASS [Mus musculus]	4	5	8	0	1.8191e+07	0	4.79182e+07	0	5	0	3
262118273	RARS	NOT_in_TF_list	arginine--tRNA ligase, cytoplasmic [Mus musculus]	7	7	7	0	0	6.61441e+06	0	0	0	7	0
86198301	CEBPA	GeneID:1050	CCAAT/enhancer-binding protein alpha [Mus musculus]	6	6	27	0	3.68933e+07	2.04781e+07	4.24515e+07	0	7	7	13
225543168	LPP	NOT_in_TF_list	lipoma-preferred partner homolog isoform 2 [Mus musculus]	4	4	4	0	0	4.13533e+06	0	0	0	4	0
6754900	NT5E	NOT_in_TF_list	5'-nucleotidase precursor [Mus musculus]	6	6	6	0	0	5.96331e+06	0	0	0	6	0
110625780	KDSR	NOT_in_TF_list	3-ketodihydrosphingosine reductase precursor [Mus musculus]	1	1	2	0	0	0	0	2	0	0	0
6680924	CFL1	NOT_in_TF_list	cofilin-1 [Mus musculus]	2	2	3	2.18318e+06	0	1.65111e+06	3.96786e+06	1	0	1	1
158749553	SF3A2	NOT_in_TF_list	splicing factor 3A subunit 2 [Mus musculus]	5	5	5	0	0	5.96802e+06	0	0	0	5	0
30424609	YTHDF1	NOT_in_TF_list	YTH domain family protein 1 [Mus musculus]	3	6	7	0	0	4.53986e+06	0	0	0	7	0
16716475	DDX50	NOT_in_TF_list	ATP-dependent RNA helicase DDX50 [Mus musculus]	8	9	14	1.55415e+06	9.75644e+06	2.44679e+07	3.04125e+06	1	8	2	3
158636012	SSB	NOT_in_TF_list	lupus La protein homolog [Mus musculus]	5	5	6	0	8.5978e+06	0	4.02077e+06	0	1	0	5
171846245	NR2C1	GeneID:7181	nuclear receptor subfamily 2 group C member 1 [Mus musculus]	5	5	5	0	0	4.63841e+06	0	0	0	5	0
110625965	1600027N09RIK	NOT_in_TF_list	MRG/MORF4L-binding protein [Mus musculus]	2	2	2	0	0	3.38266e+06	0	0	0	2	0
54020730	EFR3A	NOT_in_TF_list	protein EFR3 homolog A [Mus musculus]	8	8	12	0	4.81439e+06	0	2.89953e+06	0	8	0	4
124430514	DDX23	NOT_in_TF_list	probable ATP-dependent RNA helicase DDX23 [Mus musculus]	11	11	17	0	1.52194e+07	507342	4.1173e+07	0	9	1	7
253795498	DEK	NOT_in_TF_list	protein DEK [Mus musculus]	5	5	7	0	2.00455e+06	0	3.2382e+06	0	2	0	5
239835748	TCFEB	NOT_in_TF_list	transcription factor EB isoform b [Mus musculus]	2	5	10	0	2.24346e+07	4.93525e+07	1.31281e+07	0	1	7	2
24418933	ACSF2	NOT_in_TF_list	acyl-CoA synthetase family member 2, mitochondrial precursor [Mus musculus]	5	5	5	0	0	4.39407e+06	0	0	0	5	0
148839318	SMCHD1	NOT_in_TF_list	structural maintenance of chromosomes flexible hinge domain-containing protein 1 [Mus musculus]	22	22	22	5769387	0	0	7.84727e+06	1	0	0	21
31543940	VAPB	NOT_in_TF_list	vesicle-associated membrane protein-associated protein B [Mus musculus]	2	3	3	0	0	6.26941e+06	0	0	0	3	0
21312352	SKIV2L2	NOT_in_TF_list	superkiller viralicidic activity 2-like 2 [Mus musculus]	13	13	18	4.38969e+06	2.79784e+06	0	3.90878e+06	7	6	0	5
295424169	WHSC1	NOT_in_TF_list	histone-lysine N-methyltransferase NSD2 isoform 3 [Mus musculus]	7	7	9	0	5.84599e+06	1.76506e+06	0	0	7	2	0
124001570	GTF2I	NOT_in_TF_list	general transcription factor II-I isoform 4 [Mus musculus]	10	10	15	0	1.29935e+07	2.08531e+06	9.60605e+06	0	8	1	6
148664250	HNRPDL	NOT_in_TF_list	heterogeneous nuclear ribonucleoprotein D-like [Mus musculus]	3	6	18	3.902e+07	1.57486e+08	4.76405e+06	1.79812e+08	6	1	1	10
110625961	RPA2	NOT_in_TF_list	replication protein A 32 kDa subunit [Mus musculus]	3	3	4	7.23963e+06	0	5.5892e+06	0	3	0	1	0
18390321	RPA1	NOT_in_TF_list	replication protein A 70 kDa DNA-binding subunit isoform 2 [Mus musculus]	7	7	7	0	0	6.57244e+06	0	0	0	7	0
298676498	MAGT1	NOT_in_TF_list	magnesium transporter protein 1 [Mus musculus]	5	5	5	0	0	5.03193e+06	0	0	0	5	0
33468955	IK	NOT_in_TF_list	protein Red [Mus musculus]	6	6	6	0	0	8.38744e+06	0	0	0	6	0
17157989	MSI2	NOT_in_TF_list	RNA-binding protein Musashi homolog 2 isoform 1 [Mus musculus]	3	3	3	3.15329e+06	0	0	0	3	0	0	0
119220568	ONECUT2	GeneID:9480	one cut domain family member 2 [Mus musculus]	5	5	6	0	5.13859e+06	1.08246e+06	0	0	4	2	0
6755742	TCOF1	NOT_in_TF_list	treacle protein isoform 2 [Mus musculus]	14	14	18	0	0	1.00567e+06	1.17521e+07	0	0	1	17
299473734	ABCF2	NOT_in_TF_list	ATP-binding cassette sub-family F member 2 isoform 2 [Mus musculus]	7	7	11	0	1.56186e+06	9.13884e+06	0	0	3	8	0
229892332	FARP2	NOT_in_TF_list	FERM, RhoGEF and pleckstrin domain-containing protein 2 [Mus musculus]	10	10	13	0	2.71373e+06	0	2.65452e+06	0	7	0	6
55925589	PRPF4	NOT_in_TF_list	U4/U6 small nuclear ribonucleoprotein Prp4 [Mus musculus]	6	6	8	0	0	2.58726e+06	1.337e+06	0	0	6	2
6753520	CREG1	NOT_in_TF_list	protein CREG1 precursor [Mus musculus]	2	2	3	0	0	2.35141e+06	740542	0	0	2	1
110665742	LARP7	NOT_in_TF_list	la-related protein 7 [Mus musculus]	6	6	7	0	0	8.5466e+06	0	0	0	7	0
82880662	HSPA14	NOT_in_TF_list	heat shock 70 kDa protein 14 isoform 1 [Mus musculus]	4	4	4	0	0	2.70839e+06	0	0	0	4	0
254028159	SAFB	NOT_in_TF_list	scaffold attachment factor B1 [Mus musculus]	8	10	17	916439	1.68989e+07	381865	4.45982e+07	1	4	1	11
67972435	DDX49	NOT_in_TF_list	probable ATP-dependent RNA helicase DDX49 [Mus musculus]	6	6	7	0	1.34195e+07	0	3.35793e+06	0	4	0	3
88853581	EWSR1	NOT_in_TF_list	RNA-binding protein EWS [Mus musculus]	7	7	20	0	1.40669e+07	9.36776e+06	9.78884e+06	0	7	8	5
6754656	MBL2	NOT_in_TF_list	mannose-binding protein C precursor [Mus musculus]	3	3	3	0	0	1.58989e+06	0	0	0	3	0
6678728	LTB4R1	NOT_in_TF_list	leukotriene B4 receptor 1 [Mus musculus]	1	1	1	0	0	0	0	0	0	1	0
365812519	MisMatch	NOT_in_TF_list	CXXC-type zinc finger protein 4 [Mus musculus]	2	2	6	0	0	0	0	6	0	0	0
162417977	IDH1	NOT_in_TF_list	isocitrate dehydrogenase [NADP] cytoplasmic [Mus musculus]	5	5	8	0	1.15458e+06	144366	4.83256e+06	0	1	1	6
7710014	CUL3	NOT_in_TF_list	cullin-3 [Mus musculus]	8	8	10	0	2.05304e+06	3.26521e+06	972541	0	2	7	1
119637823	HNRNPH3	NOT_in_TF_list	heterogeneous nuclear ribonucleoprotein H3 [Mus musculus]	1	1	2	0	0	0	0	2	0	0	0
23346437	SF3B4	NOT_in_TF_list	splicing factor 3B subunit 4 [Mus musculus]	3	3	9	0	7.76171e+06	0	9.07532e+06	0	3	1	5
32140197	NNAT	NOT_in_TF_list	neuronatin isoform beta [Mus musculus]	1	1	1	0	0	1.16988e+06	0	0	0	1	0
6679803	FKBP1A	NOT_in_TF_list	peptidyl-prolyl cis-trans isomerase FKBP1A [Mus musculus]	1	1	2	0	0	1.11726e+06	1.09182e+06	0	0	1	1
13385408	RPL11	NOT_in_TF_list	60S ribosomal protein L11 [Mus musculus]	2	2	3	0	2.63447e+06	0	1.85091e+06	0	1	0	2
226062635	RANGAP1	NOT_in_TF_list	ran GTPase-activating protein 1 [Mus musculus]	6	6	7	0	4.89737e+06	1.99169e+06	0	0	3	4	0
159110787	MTAP7	NOT_in_TF_list	ensconsin isoform 1 [Mus musculus]	5	5	7	0	2.33596e+06	1.06445e+06	2.0944e+06	0	2	1	4
6755965	VDAC2	NOT_in_TF_list	voltage-dependent anion-selective channel protein 2 [Mus musculus]	3	3	4	168750	0	2.54567e+06	0	1	0	3	0
71067349	C430048L16RIK	NOT_in_TF_list	RNA-binding protein 12B-B [Mus musculus]	1	10	13	0	5.33884e+06	0	1.919e+06	0	9	0	4
225579033	IDH2	NOT_in_TF_list	isocitrate dehydrogenase [NADP], mitochondrial precursor [Mus musculus]	5	5	7	0	1.28564e+06	0	2.8808e+06	0	4	0	3
172088112	RBM12B	NOT_in_TF_list	RNA-binding protein 12B-A [Mus musculus]	1	10	13	0	5.33884e+06	0	2.04129e+06	0	8	0	5
6680832	CALM2	NOT_in_TF_list	calmodulin [Mus musculus]	2	2	4	1.1348e+06	0	1.60427e+06	1.79796e+06	1	0	2	1
91598896	MTA1	GeneID:9112	metastasis-associated protein MTA1 [Mus musculus]	2	8	13	0	0	2.99699e+07	2.42599e+07	0	1	9	3
38348308	RYBP	GeneID:23429	RING1 and YY1-binding protein [Mus musculus]	3	3	4	0	0	3.83203e+06	0	0	0	4	0
31980912	PAF1	NOT_in_TF_list	RNA polymerase II-associated factor 1 homolog [Mus musculus]	6	6	7	0	0	6.34293e+06	0	0	0	7	0
120300925	HOXB3	GeneID:3213	homeobox protein Hox-B3 [Mus musculus]	4	4	5	0	0	0	0	3	0	2	0
7106255	ARG1	NOT_in_TF_list	arginase-1 [Mus musculus]	4	4	7	2.72537e+06	0	0	1.36079e+07	1	0	0	6
119672912	CHERP	NOT_in_TF_list	calcium homeostasis endoplasmic reticulum protein [Mus musculus]	10	10	17	0	1.24257e+07	833620	1.00759e+07	0	9	1	7
227908769	NTHL1	NOT_in_TF_list	endonuclease III-like protein 1 [Mus musculus]	2	2	2	0	0	0	2.43151e+06	0	0	0	2
358248353	MisMatch	NOT_in_TF_list	structural maintenance of chromosomes protein 5 isoform 3 [Mus musculus]	1	10	14	3.8796e+06	3.33524e+06	0	2.7304e+06	2	7	0	5
6680073	GPR27	NOT_in_TF_list	probable G-protein coupled receptor 27 [Mus musculus]	1	1	2	0	0	0	0	2	0	0	0
19111164	SUMO2	NOT_in_TF_list	small ubiquitin-related modifier 2 precursor [Mus musculus]	1	1	2	0	3.03487e+06	0	0	0	1	0	1
21313354	HRASLS5	NOT_in_TF_list	Ca(2+)-independent N-acyltransferase [Mus musculus]	1	1	1	0	0	0	0	1	0	0	0
31543942	VCL	NOT_in_TF_list	vinculin [Mus musculus]	12	12	16	0	4.52485e+06	975647	4.88264e+06	0	8	1	7
12584984	PES1	NOT_in_TF_list	pescadillo homolog [Mus musculus]	8	8	8	0	0	1.21773e+07	0	0	0	8	0
154146245	NSUN5	NOT_in_TF_list	putative methyltransferase NSUN5 [Mus musculus]	5	5	5	0	5.5679e+06	0	3.46536e+06	0	1	0	4
257743021	2410016O06RIK	NOT_in_TF_list	bifunctional lysine-specific demethylase and histidyl-hydroxylase NO66 [Mus musculus]	6	6	9	1.78184e+06	0	5.72227e+06	0	4	0	5	0
31980922	EEF1B2	NOT_in_TF_list	elongation factor 1-beta [Mus musculus]	2	2	2	0	0	6.34143e+06	0	0	0	2	0
169234938	ABCB7	NOT_in_TF_list	ATP-binding cassette sub-family B member 7, mitochondrial [Mus musculus]	8	8	8	0	0	5.81158e+06	0	0	0	8	0
459683847	MisMatch	NOT_in_TF_list	60S ribosomal protein L22 isoform c [Mus musculus]	1	1	1	0	0	1.71385e+06	0	0	0	1	0
6755987	VTN	NOT_in_TF_list	vitronectin precursor [Mus musculus]	5	5	5	0	0	3.14347e+06	0	0	0	5	0
238231425	KRT35	NOT_in_TF_list	keratin, type I cuticular Ha5 [Mus musculus]	4	6	29	7.59059e+08	2.2804e+09	1.04961e+09	3.33206e+09	13	3	3	10
146134371	3110082I17RIK	NOT_in_TF_list	uncharacterized protein C7orf50 homolog [Mus musculus]	1	1	1	0	0	1.19671e+06	0	0	0	1	0
33468983	MRPL15	NOT_in_TF_list	39S ribosomal protein L15, mitochondrial isoform 2 precursor [Mus musculus]	2	2	2	0	0	796786	0	0	1	1	0
258613892	SMC1A	NOT_in_TF_list	structural maintenance of chromosomes protein 1A [Mus musculus]	15	15	16	0	0	0	9.42435e+06	0	0	0	16
269784644	ZFP326	NOT_in_TF_list	DBIRD complex subunit ZNF326 [Mus musculus]	5	5	5	0	0	2.52361e+06	0	0	0	5	0
8394027	PPP2R1A	NOT_in_TF_list	serine/threonine-protein phosphatase 2A 65 kDa regulatory subunit A alpha isoform [Mus musculus]	5	5	5	0	0	4.52771e+06	0	0	0	5	0
118344452	SRP72	NOT_in_TF_list	signal recognition particle 72 [Mus musculus]	6	6	6	0	0	6.35639e+06	0	0	0	6	0
407262373	MisMatch	NOT_in_TF_list	PREDICTED: uncharacterized LOC101056140 [Mus musculus]	4	4	5	0	0	6.83821e+06	1.75295e+06	1	0	3	1
51010909	TRY5	NOT_in_TF_list	trypsin 5 precursor [Mus musculus]	1	2	11	3.56856e+07	9.71412e+06	6.95417e+07	4.53552e+06	2	4	2	3
269996037	MORF4L2	NOT_in_TF_list	mortality factor 4-like protein 2 [Mus musculus]	3	3	4	0	0	5.00758e+06	661758	0	0	2	2
210033190	FCRL1	NOT_in_TF_list	Fc receptor-like protein 1 isoform 1 precursor [Mus musculus]	1	1	1	0	1.55618e+06	0	0	0	1	0	0
226531139	LGALS9	NOT_in_TF_list	galectin-9 isoform 2 [Mus musculus]	3	3	6	0	0	4.43722e+06	1.06142e+07	0	0	1	5
116089351	ABI1	NOT_in_TF_list	abl interactor 1 isoform 5 [Mus musculus]	3	3	3	0	0	2.0513e+06	0	0	0	3	0
251823855	VNN1	NOT_in_TF_list	pantetheinase precursor [Mus musculus]	5	5	5	0	0	6.68732e+06	0	0	0	5	0
46195798	DDOST	NOT_in_TF_list	dolichyl-diphosphooligosaccharide--protein glycosyltransferase 48 kDa subunit precursor [Mus musculus]	5	5	6	0	5.29924e+06	0	3.28537e+06	0	4	0	2
326806988	YES1	NOT_in_TF_list	tyrosine-protein kinase Yes [Mus musculus]	3	4	5	0	0	4.93974e+06	0	0	0	5	0
113680741	HSD11B1	NOT_in_TF_list	corticosteroid 11-beta-dehydrogenase isozyme 1 [Mus musculus]	4	4	5	0	0	3.38606e+06	8.86406e+06	0	0	3	2
117606328	ZBTB44	GeneID:29068	zinc finger and BTB domain-containing protein 44 isoform b [Mus musculus]	4	4	5	0	2.01453e+06	2.26036e+06	0	0	1	4	0
8393627	IRF3	GeneID:3661	interferon regulatory factor 3 [Mus musculus]	4	4	4	0	5.07978e+06	0	0	0	4	0	0
407263167	MisMatch	NOT_in_TF_list	PREDICTED: uncharacterized protein LOC101056016 [Mus musculus]	1	1	1	0	0	0	0	1	0	0	0
170671710	SH3D19	NOT_in_TF_list	SH3 domain-containing protein 19 [Mus musculus]	7	7	12	0	3.8963e+06	0	4.43365e+06	0	1	0	11
124249077	POLR2E	NOT_in_TF_list	DNA-directed RNA polymerases I, II, and III subunit RPABC1 [Mus musculus]	2	2	2	0	0	1.05845e+06	0	0	0	2	0
188219589	LMNB1	NOT_in_TF_list	lamin-B1 [Mus musculus]	5	6	6	0	0	6.54424e+06	0	0	0	6	0
63079715	DPPA4	NOT_in_TF_list	developmental pluripotency-associated protein 4 isoform 2 [Mus musculus]	1	1	1	0	0	0	0	0	0	0	1
46849708	SUCLA2	NOT_in_TF_list	succinyl-CoA ligase [ADP-forming] subunit beta, mitochondrial precursor [Mus musculus]	4	4	5	0	2.35539e+06	0	5.6628e+06	0	1	0	4
13195624	NDUFA10	NOT_in_TF_list	NADH dehydrogenase [ubiquinone] 1 alpha subcomplex subunit 10, mitochondrial precursor [Mus musculus]	3	3	5	0	3.1276e+06	0	5.94628e+06	0	2	0	3
158854014	PIPOX	NOT_in_TF_list	peroxisomal sarcosine oxidase [Mus musculus]	4	4	6	0	2.72175e+06	0	4.90663e+06	0	3	0	3
34147169	ZFP598	NOT_in_TF_list	zinc finger protein 598 [Mus musculus]	8	8	10	0	5.48344e+06	0	2.10057e+06	0	5	0	5
51092301	GM5414	NOT_in_TF_list	type II keratin Kb14 [Mus musculus]	2	9	23	1.6744e+08	5.11539e+08	2.79142e+08	2.2334e+08	4	4	4	11
295844817	MITF	GeneID:4286	microphthalmia-associated transcription factor isoform 3 [Mus musculus]	3	7	10	0	2.24346e+07	5.0873e+07	1.31281e+07	0	1	7	2
124486606	GM12657	NOT_in_TF_list	predicted gene 12657 [Mus musculus]	2	2	4	1.37782e+06	0	9.96522e+06	1.28566e+07	1	0	2	1
7305395	PNP	NOT_in_TF_list	purine nucleoside phosphorylase [Mus musculus]	3	3	3	1.37558e+06	0	1.92311e+06	0	1	0	2	0
247300747	A430005L14RIK	NOT_in_TF_list	UPF0688 protein C1orf174 homolog isoform 1 [Mus musculus]	2	2	3	0	0	0	1.32101e+06	0	0	0	3
237820699	MOCS3	NOT_in_TF_list	adenylyltransferase and sulfurtransferase MOCS3 [Mus musculus]	2	2	2	0	0	0	0	1	0	0	1
112293271	LOR	NOT_in_TF_list	loricrin [Mus musculus]	1	1	2	0	0	0	0	1	0	0	1
6754254	HSP90AA1	NOT_in_TF_list	heat shock protein HSP 90-alpha [Mus musculus]	2	8	13	0	1.64153e+07	1.62799e+07	6.80557e+06	0	4	2	7
226958422	PACSIN2	NOT_in_TF_list	protein kinase C and casein kinase substrate in neurons protein 2 [Mus musculus]	6	6	7	0	3.79837e+06	7.25869e+06	5.49917e+06	0	1	5	1
377836044	MisMatch	NOT_in_TF_list	PREDICTED: uncharacterized protein LOC100040697 isoform 4 [Mus musculus]	1	1	8	2.30376e+07	0	3.24116e+07	6.94538e+08	2	0	2	4
164565377	U2AF2	NOT_in_TF_list	splicing factor U2AF 65 kDa subunit isoform 2 [Mus musculus]	4	4	4	0	0	4.53682e+06	0	0	0	4	0
6671702	CCT5	NOT_in_TF_list	T-complex protein 1 subunit epsilon [Mus musculus]	5	5	7	0	0	3.76257e+06	0	0	0	7	0
10048462	SLC25A20	NOT_in_TF_list	mitochondrial carnitine/acylcarnitine carrier protein [Mus musculus]	4	4	6	741644	0	2.23144e+07	0	2	0	4	0
158635992	PDLIM1	NOT_in_TF_list	PDZ and LIM domain protein 1 [Mus musculus]	2	2	2	0	0	0	1.40477e+06	0	0	0	2
29568084	SNX9	NOT_in_TF_list	sorting nexin-9 [Mus musculus]	4	4	4	0	1.05861e+06	5.43676e+06	0	0	1	3	0
159032064	SALL1	GeneID:6299	sal-like protein 1 [Mus musculus]	9	9	11	0	0	1.6022e+06	5.49265e+06	0	0	1	10
66932980	CRLS1	NOT_in_TF_list	cardiolipin synthase isoform 1 [Mus musculus]	1	1	1	0	0	0	0	1	0	0	0
21630289	OASL1	NOT_in_TF_list	2'-5'-oligoadenylate synthase-like protein 1 [Mus musculus]	4	4	5	0	3.09587e+06	0	4.08578e+06	0	4	0	1
255958302	MTM1	NOT_in_TF_list	myotubularin isoform 2 [Mus musculus]	4	4	5	0	0	1.75781e+06	0	0	0	5	0
21450291	ALDOB	NOT_in_TF_list	fructose-bisphosphate aldolase B [Mus musculus]	3	4	8	1.00162e+06	0	0	4.0828e+06	2	0	0	6
30519943	SAMM50	NOT_in_TF_list	sorting and assembly machinery component 50 homolog [Mus musculus]	6	6	9	0	6.67657e+06	7.21399e+06	4.5368e+06	0	6	1	2
30102935	TBL3	NOT_in_TF_list	transducin beta-like protein 3 [Mus musculus]	6	6	6	0	2.48279e+06	0	0	0	6	0	0
112181167	C1QBP	NOT_in_TF_list	complement component 1 Q subcomponent-binding protein, mitochondrial [Mus musculus]	4	4	5	0	0	2.97167e+06	703534	0	0	4	1
46518499	TAF10	NOT_in_TF_list	transcription initiation factor TFIID subunit 10 [Mus musculus]	1	1	2	0	0	4.90805e+06	0	0	0	2	0
23956272	SLC25A45	NOT_in_TF_list	solute carrier family 25 member 45 [Mus musculus]	3	3	3	0	0	1.7146e+06	0	0	0	3	0
145553997	ARID1B	GeneID:57492	AT rich interactive domain 1B (Swi1 like) [Mus musculus]	17	20	28	0	3.19291e+06	4.83069e+06	1.27439e+07	0	1	1	26
33942089	ATXN2L	NOT_in_TF_list	ataxin-2-like protein [Mus musculus]	6	6	8	0	0	0	2.02243e+06	1	0	0	7
29725637	KCTD10	NOT_in_TF_list	BTB/POZ domain-containing adapter for CUL3-mediated RhoA degradation protein 3 isoform 2 [Mus musculus]	3	3	3	0	0	0	1.17307e+06	0	0	0	3
169808385	ZCCHC8	NOT_in_TF_list	zinc finger CCHC domain-containing protein 8 [Mus musculus]	6	6	6	5.46407e+06	0	0	0	6	0	0	0
145207948	TRIM25	NOT_in_TF_list	E3 ubiquitin/ISG15 ligase TRIM25 [Mus musculus]	6	6	6	0	0	3.61736e+06	0	0	0	6	0
6678059	SNTB2	NOT_in_TF_list	beta-2-syntrophin [Mus musculus]	4	6	10	0	1.68715e+06	2.86789e+06	4.95883e+06	0	2	4	4
23510273	RBM45	NOT_in_TF_list	RNA-binding protein 45 [Mus musculus]	5	5	7	170782	1.85465e+06	0	2.24101e+06	1	4	0	2
22164776	KRT79	NOT_in_TF_list	keratin, type II cytoskeletal 79 [Mus musculus]	1	13	93	4.51686e+08	7.1711e+08	4.80566e+08	1.65708e+09	21	21	15	36
163954941	FXR1	NOT_in_TF_list	fragile X mental retardation syndrome-related protein 1 isoform 1 [Mus musculus]	5	6	6	0	0	6.96146e+06	0	0	0	6	0
34328253	DDX24	NOT_in_TF_list	ATP-dependent RNA helicase DDX24 isoform 2 [Mus musculus]	8	8	11	0	3.23216e+06	0	2.47894e+06	0	5	0	6
309271794	2210011C24RIK	NOT_in_TF_list	PREDICTED: uncharacterized protein LOC113230 [Mus musculus]	2	2	2	0	0	1.20457e+06	0	0	0	2	0
160333783	HABP4	NOT_in_TF_list	intracellular hyaluronan-binding protein 4 [Mus musculus]	3	3	4	0	0	4.01597e+06	2.91035e+06	0	0	2	2
126090857	FAM120A	NOT_in_TF_list	constitutive coactivator of PPAR-gamma-like protein 1 [Mus musculus]	10	10	21	0	2.37652e+06	639052	6.17068e+06	0	6	1	14
124430549	YTHDC1	NOT_in_TF_list	YTH domain containing 1 [Mus musculus]	8	8	16	0	1.7315e+07	0	1.2571e+07	0	8	0	8
238231443	DUSP7	NOT_in_TF_list	dual specificity protein phosphatase 7 [Mus musculus]	1	1	1	0	0	0	0	1	0	0	0
167234435	EML4	NOT_in_TF_list	echinoderm microtubule-associated protein-like 4 isoform 1 [Mus musculus]	9	9	10	0	2.90643e+06	0	3.03113e+06	0	6	0	4
10181122	WDR46	NOT_in_TF_list	WD repeat-containing protein 46 [Mus musculus]	4	4	4	0	0	1.69118e+06	0	0	0	4	0
165377121	SHARPIN	NOT_in_TF_list	sharpin [Mus musculus]	1	1	1	0	0	0	0	1	0	0	0
37674242	BST2	NOT_in_TF_list	bone marrow stromal antigen 2 precursor [Mus musculus]	2	2	4	169844	0	6.17599e+06	991533	1	0	1	2
8393343	FABP1	NOT_in_TF_list	fatty acid-binding protein, liver [Mus musculus]	1	1	1	0	0	0	0	0	0	1	0
51592080	SPTY2D1	NOT_in_TF_list	protein SPT2 homolog [Mus musculus]	7	7	14	0	4.0758e+06	2.97388e+06	9.95347e+06	0	4	4	6
6679439	PPIA	NOT_in_TF_list	peptidyl-prolyl cis-trans isomerase A [Mus musculus]	2	2	3	692066	0	718339	0	1	0	1	1
45476581	SCP2	NOT_in_TF_list	non-specific lipid-transfer protein [Mus musculus]	6	6	7	0	0	5.34742e+06	0	0	0	7	0
127140986	SOX2	GeneID:6657	transcription factor SOX-2 [Mus musculus]	1	1	1	0	0	0	0	1	0	0	0
19745150	CYB5R3	NOT_in_TF_list	NADH-cytochrome b5 reductase 3 [Mus musculus]	3	3	3	1.61638e+06	0	1.67699e+06	0	2	0	1	0
61098124	FAM98B	NOT_in_TF_list	protein FAM98B [Mus musculus]	3	5	10	0	7.86817e+06	4.65784e+06	1.17706e+07	0	5	2	3
31981760	ACNAT2	NOT_in_TF_list	acyl-coenzyme A amino acid N-acyltransferase 2 [Mus musculus]	1	1	1	0	0	0	0	1	0	0	0
33859652	WHSC2	NOT_in_TF_list	negative elongation factor A [Mus musculus]	5	5	5	0	0	3.19521e+06	0	0	0	5	0
6678329	TGM2	NOT_in_TF_list	protein-glutamine gamma-glutamyltransferase 2 [Mus musculus]	6	6	6	0	0	7.56361e+06	0	0	0	6	0
166197700	PARP14	NOT_in_TF_list	poly [ADP-ribose] polymerase 14 [Mus musculus]	17	17	18	0	0	0	8.69754e+06	0	0	0	18
358679365	MisMatch	NOT_in_TF_list	mitochondrial peptide methionine sulfoxide reductase isoform 3 [Mus musculus]	2	2	2	0	0	1.73166e+06	0	0	0	2	0
188528700	MRGPRA2B	NOT_in_TF_list	mas-related G-protein coupled receptor member A2 [Mus musculus]	1	1	1	0	0	0	1.52128e+06	0	0	0	1
282847353	OLFR1129	NOT_in_TF_list	olfactory receptor 1129 [Mus musculus]	1	1	1	0	0	0	0	1	0	0	0
27552760	TOMM70A	NOT_in_TF_list	mitochondrial import receptor subunit TOM70 [Mus musculus]	3	3	3	0	0	709649	0	1	0	2	0
257196207	NSMCE2	NOT_in_TF_list	E3 SUMO-protein ligase NSE2 isoform 2 [Mus musculus]	1	1	1	0	0	2.16044e+06	0	0	0	1	0
30424982	FAM46B	NOT_in_TF_list	protein FAM46B [Mus musculus]	1	1	1	0	0	0	0	0	0	1	0
18017602	SH3BGRL3	NOT_in_TF_list	SH3 domain-binding glutamic acid-rich-like protein 3 [Mus musculus]	1	1	4	820971	1.86759e+06	304652	0	1	2	1	0
227116327	TLN1	NOT_in_TF_list	talin-1 [Mus musculus]	21	21	24	620665	0	0	6.7189e+06	1	0	0	23
274323057	C2CD4C	NOT_in_TF_list	C2 calcium-dependent domain-containing protein 4C [Mus musculus]	1	1	1	0	0	0	0	0	0	1	0
254939663	SENP3	NOT_in_TF_list	sentrin-specific protease 3 [Mus musculus]	5	5	5	0	0	2.52297e+06	0	0	0	5	0
213513185	RBMS1	NOT_in_TF_list	RNA-binding motif, single-stranded-interacting protein 1 isoform 2 [Mus musculus]	3	3	8	6.43273e+06	467893	2.34801e+06	718333	4	1	1	2
254692855	RAD21	NOT_in_TF_list	double-strand-break repair protein rad21 homolog [Mus musculus]	7	7	9	0	4.45636e+06	0	2.87652e+06	0	6	0	3
62909983	CPSF6	NOT_in_TF_list	cleavage and polyadenylation specificity factor subunit 6 [Mus musculus]	5	5	6	0	0	1.17805e+07	0	0	0	6	0
254553392	ZFP512	GeneID:84450	zinc finger protein 512 [Mus musculus]	4	4	5	0	0	6.20091e+06	0	0	0	5	0
27369581	SLC25A12	NOT_in_TF_list	calcium-binding mitochondrial carrier protein Aralar1 [Mus musculus]	4	6	7	3.33343e+06	510494	2.37859e+07	0	1	1	5	0
126723205	OBFC2A	NOT_in_TF_list	SOSS complex subunit B2 [Mus musculus]	2	2	2	3.13124e+06	0	0	0	2	0	0	0
6678359	TKT	NOT_in_TF_list	transketolase [Mus musculus]	5	5	7	0	0	2.94086e+06	1.38945e+06	0	0	5	2
358679356	MisMatch	NOT_in_TF_list	muscleblind-like protein 1 isoform 5 [Mus musculus]	1	1	2	0	3.89938e+06	0	3.80741e+06	0	1	0	1
7948999	PRDX4	NOT_in_TF_list	peroxiredoxin-4 precursor [Mus musculus]	1	3	4	0	0	1.86857e+07	4241792	0	0	3	1
240849436	NEXN	NOT_in_TF_list	nexilin [Mus musculus]	7	7	13	0	8.7038e+06	492372	5.99958e+06	0	7	1	5
226823220	KRT15	NOT_in_TF_list	keratin, type I cytoskeletal 15 [Mus musculus]	2	11	107	1.00909e+09	1.68144e+09	1.04164e+09	5.55294e+09	25	19	17	46
161484644	AI661453	NOT_in_TF_list	uncharacterized protein C6orf132 homolog [Mus musculus]	9	9	9	0	0	0	5.50192e+06	0	0	0	9
19527218	1810008A18RIK	NOT_in_TF_list	protein FAM207A [Mus musculus]	2	2	2	0	0	1.80331e+06	0	0	0	2	0
40538825	DDX51	NOT_in_TF_list	ATP-dependent RNA helicase DDX51 [Mus musculus]	7	7	8	0	0	3.75824e+06	0	0	0	8	0
6677659	DNAJC2	GeneID:27000	dnaJ homolog subfamily C member 2 [Mus musculus]	5	5	6	0	1.16069e+06	2.76817e+06	0	0	1	5	0
47059067	POU4F2	GeneID:5458	POU domain, class 4, transcription factor 2 [Mus musculus]	1	1	2	0	0	0	0	1	0	1	0
309268661	GM5890	NOT_in_TF_list	PREDICTED: serine/threonine-protein kinase MARK2-like isoform 1 [Mus musculus]	1	1	2	0	0	0	4756914407	0	1	0	1
6678449	TST	NOT_in_TF_list	thiosulfate sulfurtransferase [Mus musculus]	3	3	3	0	0	0	1.85596e+06	0	0	0	3
78000154	SORBS1	NOT_in_TF_list	sorbin and SH3 domain-containing protein 1 isoform 5 [Mus musculus]	6	6	8	0	3.30003e+06	0	2.81985e+06	0	4	1	3
210031395	VASH1	NOT_in_TF_list	vasohibin-1 [Mus musculus]	1	1	1	0	0	0	0	1	0	0	0
47523977	KRT72-PS	NOT_in_TF_list	keratin, type II cytoskeletal 72 [Mus musculus]	1	9	57	1.73067e+08	3.47059e+08	3.00556e+08	1.45762e+08	13	11	9	24
31980914	SYT8	NOT_in_TF_list	synaptotagmin-8 [Mus musculus]	1	1	1	0	0	0	0	1	0	0	0
46909571	GATA6	GeneID:2627	transcription factor GATA-6 [Mus musculus]	3	3	3	0	0	3.97712e+06	1.4508e+06	0	0	2	1
226958428	RING1	NOT_in_TF_list	E3 ubiquitin-protein ligase RING1 [Mus musculus]	2	3	3	0	583099	0	3.6513e+06	0	1	0	2
154759331	HARBI1	NOT_in_TF_list	putative nuclease HARBI1 [Mus musculus]	3	3	3	0	0	0	575664	0	0	0	3
21624609	BPHL	NOT_in_TF_list	valacyclovir hydrolase precursor [Mus musculus]	2	2	2	0	0	1.29049e+06	0	0	0	2	0
224994273	TLK1	NOT_in_TF_list	serine/threonine-protein kinase tousled-like 1 [Mus musculus]	2	7	15	0	4.12448e+06	2.42656e+06	4.56002e+06	0	6	4	5
254540032	CTNNBL1	NOT_in_TF_list	beta-catenin-like protein 1 [Mus musculus]	6	6	6	0	0	2.82694e+06	0	0	0	6	0
6754608	MAFF	GeneID:23764	transcription factor MafF [Mus musculus]	1	1	1	0	0	1.08686e+06	0	0	0	1	0
254553424	THOC3	NOT_in_TF_list	THO complex subunit 3 [Mus musculus]	4	4	6	0	0	0	2.12265e+07	0	1	0	5
162135971	CCDC6	NOT_in_TF_list	coiled-coil domain-containing protein 6 [Mus musculus]	3	3	11	0	0	0	0	11	0	0	0
229335598	NR5A2	GeneID:2494	nuclear receptor subfamily 5 group A member 2 isoform 2 [Mus musculus]	5	5	7	0	8.48497e+06	0	3.12651e+06	0	5	0	2
6680019	GCLM	NOT_in_TF_list	glutamate--cysteine ligase regulatory subunit [Mus musculus]	2	2	2	0	0	2.87082e+06	0	0	0	2	0
72384361	GSK3A	NOT_in_TF_list	glycogen synthase kinase-3 alpha [Mus musculus]	1	1	1	0	0	0	0	0	0	1	0
31543845	TBL2	NOT_in_TF_list	transducin beta-like protein 2 precursor [Mus musculus]	4	4	5	0	2.2225e+06	0	2.84654e+06	0	3	0	2
6753618	DDT	NOT_in_TF_list	D-dopachrome decarboxylase [Mus musculus]	1	1	1	0	1.61917e+06	0	0	0	1	0	0
228480238	PRPF31	NOT_in_TF_list	U4/U6 small nuclear ribonucleoprotein Prp31 isoform 2 [Mus musculus]	4	4	5	0	0	5.85426e+06	1.29292e+06	0	0	4	1
31982421	YY1	GeneID:7528	transcriptional repressor protein YY1 [Mus musculus]	4	4	4	0	0	1.05941e+07	0	0	0	4	0
33563274	RNF2	NOT_in_TF_list	E3 ubiquitin-protein ligase RING2 [Mus musculus]	1	3	7	0	5.82689e+07	3.18299e+07	1.71734e+07	0	1	1	5
34368584	ZC3H15	NOT_in_TF_list	zinc finger CCCH domain-containing protein 15 [Mus musculus]	4	4	4	0	0	4.78805e+06	0	0	0	4	0
7106389	PSMA7	NOT_in_TF_list	proteasome subunit alpha type-7 [Mus musculus]	2	2	4	2.04838e+06	0	0	855708	2	0	1	1
6681225	DRG1	NOT_in_TF_list	developmentally-regulated GTP-binding protein 1 [Mus musculus]	3	3	4	0	4.58932e+06	0	8.82042e+06	0	2	0	2
257196209	RPP30	NOT_in_TF_list	ribonuclease P protein subunit p30 [Mus musculus]	2	2	2	0	0	3.41119e+06	0	0	0	2	0
133504495	CASK	NOT_in_TF_list	peripheral plasma membrane protein CASK [Mus musculus]	8	8	10	0	2.09635e+06	0	4.49587e+06	0	5	0	5
163644329	APOE	NOT_in_TF_list	apolipoprotein E precursor [Mus musculus]	3	3	8	0	5.09734e+06	5.53475e+06	7.60366e+06	0	1	2	5
225543103	ALDH4A1	NOT_in_TF_list	delta-1-pyrroline-5-carboxylate dehydrogenase, mitochondrial precursor [Mus musculus]	5	5	5	0	0	7.20428e+06	0	0	0	5	0
21735445	PEX11C	NOT_in_TF_list	peroxisomal membrane protein 11C [Mus musculus]	2	2	2	0	0	643604	0	0	0	2	0
158966689	NOP2	NOT_in_TF_list	putative ribosomal RNA methyltransferase NOP2 [Mus musculus]	6	6	6	0	1.98017e+06	0	0	0	5	0	1
451172064	MisMatch	NOT_in_TF_list	alpha-2-HS-glycoprotein isoform 2 precursor [Mus musculus]	1	1	1	0	0	4.84002e+06	0	0	0	1	0
30794436	TAF11	NOT_in_TF_list	transcription initiation factor TFIID subunit 11 [Mus musculus]	2	2	2	0	0	3.51899e+06	0	0	0	2	0
15147224	SFXN1	NOT_in_TF_list	sideroflexin-1 [Mus musculus]	3	3	5	0	0	1.83444e+06	6.42781e+06	0	0	2	3
85362729	CAMK2G	NOT_in_TF_list	calcium/calmodulin-dependent protein kinase type II subunit gamma isoform 3 [Mus musculus]	4	5	9	0	3.61736e+06	424105	2.74274e+06	0	5	1	3
19527226	ZC3H10	NOT_in_TF_list	zinc finger CCCH domain-containing protein 10 [Mus musculus]	2	2	3	0	0	0	0	3	0	0	0
6679082	NMT1	NOT_in_TF_list	glycylpeptide N-tetradecanoyltransferase 1 [Mus musculus]	5	5	6	0	0	8.75366e+06	0	0	0	6	0
119508437	MRPL4	NOT_in_TF_list	39S ribosomal protein L4, mitochondrial [Mus musculus]	2	2	2	0	0	620419	0	0	0	2	0
22165382	CSNK1A1	NOT_in_TF_list	casein kinase I isoform alpha [Mus musculus]	3	3	3	0	0	0	2.99683e+06	0	0	0	3
145864463	UGT1A9	NOT_in_TF_list	UDP-glucuronosyltransferase 1-9 precursor [Mus musculus]	1	5	18	0	3.39212e+07	3.12097e+06	3.96003e+07	0	9	3	6
6755204	PSMB5	NOT_in_TF_list	proteasome subunit beta type-5 [Mus musculus]	2	2	2	201122	0	541873	0	1	0	1	0
133922605	VMN1R5	NOT_in_TF_list	vomeronasal 1 receptor, C19 [Mus musculus]	1	1	1	0	0	5.71594e+06	0	0	0	1	0
56550069	CCNT2	NOT_in_TF_list	cyclin T2 [Mus musculus]	2	5	7	0	341597	1.52511e+06	0	0	2	5	0
162417952	LRRFIP1	NOT_in_TF_list	leucine-rich repeat flightless-interacting protein 1 isoform 3 [Mus musculus]	3	6	12	0	1.14061e+08	1.74011e+07	8.49963e+07	0	6	1	5
11276065	CYP2E1	NOT_in_TF_list	cytochrome P450 2E1 [Mus musculus]	4	4	6	0	5.34862e+06	0	5.31982e+06	0	4	0	2
19923070	TECR	NOT_in_TF_list	very-long-chain enoyl-CoA reductase isoform 1 [Mus musculus]	3	3	4	0	0	6.26201e+06	0	0	0	4	0
38016154	NUP50	NOT_in_TF_list	nuclear pore complex protein Nup50 [Mus musculus]	4	4	5	0	1.22372e+06	0	4.15548e+06	0	2	0	3
24497433	SMC5	NOT_in_TF_list	structural maintenance of chromosomes protein 5 isoform 2 [Mus musculus]	1	10	13	0	3.33524e+06	0	2.7304e+06	0	8	0	5
145587094	9430016H08RIK	NOT_in_TF_list	uncharacterized protein C2orf47 homolog, mitochondrial precursor [Mus musculus]	2	2	2	0	0	1.6133e+06	0	0	0	2	0
32129201	DSG1B	NOT_in_TF_list	desmoglein-1-beta precursor [Mus musculus]	6	6	17	4.52022e+06	0	1.3048e+06	9.48113e+06	5	0	3	9
31542606	ELN	NOT_in_TF_list	elastin precursor [Mus musculus]	3	3	5	0	0	0	0	5	0	0	0
7304963	CLIC4	NOT_in_TF_list	chloride intracellular channel protein 4 [Mus musculus]	1	1	1	0	0	342626	0	0	0	1	0
145699101	COL4A3	NOT_in_TF_list	collagen alpha-3(IV) chain precursor [Mus musculus]	4	4	4	0	0	0	0	4	0	0	0
119433663	LUZP1	NOT_in_TF_list	leucine zipper protein 1 [Mus musculus]	7	7	10	0	2.35167e+06	316785	2.35625e+06	0	5	1	4
37718983	RAB35	NOT_in_TF_list	ras-related protein Rab-35 [Mus musculus]	1	2	2	0	0	7.23e+06	0	0	0	2	0
114326546	PGAM1	NOT_in_TF_list	phosphoglycerate mutase 1 [Mus musculus]	2	2	3	376305	0	1.82667e+06	0	1	0	2	0
194394197	ACIN1	NOT_in_TF_list	apoptotic chromatin condensation inducer in the nucleus isoform 4 [Mus musculus]	10	10	14	0	6.53974e+06	1.10143e+06	1.39668e+07	0	2	2	10
16905127	ACSM1	NOT_in_TF_list	acyl-coenzyme A synthetase ACSM1, mitochondrial [Mus musculus]	3	3	3	0	0	6.72353e+06	0	0	0	3	0
149257848	LOC100044391	NOT_in_TF_list	PREDICTED: non-histone chromosomal protein HMG-14-like [Mus musculus]	1	1	2	0	0	3.04014e+06	625059	0	0	1	1
407261373	MisMatch	NOT_in_TF_list	PREDICTED: prostaglandin E synthase 3-like [Mus musculus]	1	1	408	5.00169e+09	3.22942e+08	2.64361e+07	5.664e+07	297	89	11	11
377837185	MisMatch	NOT_in_TF_list	PREDICTED: NHP2-like protein 1-like [Mus musculus]	1	1	1	0	0	8.85763e+06	0	0	0	1	0
56797739	MLYCD	NOT_in_TF_list	malonyl-CoA decarboxylase, mitochondrial [Mus musculus]	3	4	5	0	7.52719e+06	0	1.50738e+06	0	4	0	1
158749640	PREB	NOT_in_TF_list	prolactin regulatory element-binding protein [Mus musculus]	3	3	4	0	2.38447e+06	0	3.36941e+06	0	2	0	2
28077007	UACA	NOT_in_TF_list	uveal autoantigen with coiled-coil domains and ankyrin repeats [Mus musculus]	12	12	12	0	0	0	4.86015e+06	0	0	0	12
147899467	PKP4	NOT_in_TF_list	plakophilin-4 isoform 2 [Mus musculus]	8	8	10	0	2.68365e+06	0	1.58709e+06	0	5	0	5
28076967	SUGP1	NOT_in_TF_list	SURP and G-patch domain-containing protein 1 [Mus musculus]	2	2	3	0	0	1.51397e+06	0	2	0	1	0
294832004	INTS1	NOT_in_TF_list	integrator complex subunit 1 [Mus musculus]	15	15	16	0	0	0	9.30196e+06	0	0	0	16
33859482	EEF2	NOT_in_TF_list	elongation factor 2 [Mus musculus]	8	8	9	0	2.83672e+06	0	9.16749e+06	0	2	0	7
161353449	RBM25	NOT_in_TF_list	RNA-binding protein 25 [Mus musculus]	6	6	12	0	5.4905e+06	0	1.78312e+07	0	5	0	7
153945822	RAD50	NOT_in_TF_list	DNA repair protein RAD50 [Mus musculus]	11	11	11	0	0	0	5.25285e+06	0	0	0	11
225903444	KRT84	NOT_in_TF_list	keratin, type II cuticular Hb4 [Mus musculus]	2	9	49	2.87512e+08	7.11728e+08	3.60454e+08	9.30819e+08	10	12	5	22
41235741	FAM82A1	NOT_in_TF_list	regulator of microtubule dynamics protein 2 [Mus musculus]	2	2	3	0	1.56332e+06	0	775094	0	2	0	1
17647119	ACADSB	NOT_in_TF_list	short/branched chain specific acyl-CoA dehydrogenase, mitochondrial [Mus musculus]	2	2	3	0	0	0	7.61475e+06	0	0	0	3
13385652	RPS20	NOT_in_TF_list	40S ribosomal protein S20 [Mus musculus]	1	1	1	0	0	824387	0	0	0	1	0
227499240	HAGH	NOT_in_TF_list	hydroxyacylglutathione hydrolase, mitochondrial isoform 2 [Mus musculus]	2	2	2	137216	0	3.03507e+06	0	1	0	1	0
126506294	TSR1	NOT_in_TF_list	pre-rRNA-processing protein TSR1 homolog [Mus musculus]	6	6	6	0	2.02432e+06	0	3.18841e+06	0	4	0	2
83523736	E2F3	GeneID:1871	transcription factor E2F3 [Mus musculus]	3	3	6	0	5.03254e+06	0	4.24046e+06	0	4	0	2
6679110	NPM3	NOT_in_TF_list	nucleoplasmin-3 [Mus musculus]	1	1	1	0	0	7.44351e+06	0	0	0	1	0
226052052	MTSS1	NOT_in_TF_list	metastasis suppressor protein 1 isoform 2 [Mus musculus]	5	5	7	0	2.53828e+06	515840	1.944e+06	0	4	1	2
6753316	CCNT1	NOT_in_TF_list	cyclin-T1 [Mus musculus]	2	5	8	0	341597	2.65868e+06	684134	0	2	5	1
112293264	PDIA3	NOT_in_TF_list	protein disulfide-isomerase A3 precursor [Mus musculus]	3	3	3	0	0	2.42578e+06	0	0	0	3	0
256773279	ABLIM3	NOT_in_TF_list	actin-binding LIM protein 3 [Mus musculus]	4	4	5	0	0	4.91769e+06	0	0	0	5	0
23346461	NDUFS2	NOT_in_TF_list	NADH dehydrogenase [ubiquinone] iron-sulfur protein 2, mitochondrial precursor [Mus musculus]	4	4	4	0	1.99641e+06	0	3.17837e+06	0	1	0	3
157951727	CTNNA2	NOT_in_TF_list	catenin alpha-2 isoform 1 [Mus musculus]	1	7	14	0	1.02364e+07	931884	9.06267e+06	0	7	1	6
18252782	SERPINC1	NOT_in_TF_list	antithrombin-III precursor [Mus musculus]	4	4	5	0	0	2.29067e+06	2.5663e+06	0	0	4	1
124249109	ARID1A	GeneID:8289	AT-rich interactive domain-containing protein 1A [Mus musculus]	12	16	24	0	967450	0	1.4709e+07	0	3	0	21
227908790	UNC45A	NOT_in_TF_list	protein unc-45 homolog A [Mus musculus]	8	9	12	0	8.14864e+06	0	4.43887e+06	0	7	0	5
31981130	KLF13	GeneID:51621	Krueppel-like factor 13 [Mus musculus]	2	2	2	0	0	0	777365	0	0	0	2
309266718	LOC100048759	NOT_in_TF_list	PREDICTED: complement C3-like, partial [Mus musculus]	10	10	12	0	0	7.21843e+06	0	0	0	11	1
6755392	S100A6	NOT_in_TF_list	protein S100-A6 [Mus musculus]	1	1	1	1.8251e+06	0	0	0	1	0	0	0
225543110	YTHDF2	NOT_in_TF_list	YTH domain family protein 2 [Mus musculus]	3	4	4	0	0	6.86071e+06	0	0	0	4	0
28201956	RAE1	NOT_in_TF_list	mRNA export factor [Mus musculus]	2	2	3	0	350870	0	8.29999e+06	0	1	0	2
124517663	ANXA1	NOT_in_TF_list	annexin A1 [Mus musculus]	2	3	3	725609	1.36232e+06	0	0	2	1	0	0
31981816	CYP2D10	NOT_in_TF_list	cytochrome P450 2D10 [Mus musculus]	3	4	5	0	851274	0	2.60262e+06	0	3	0	2
24962647	PEO1	NOT_in_TF_list	twinkle protein, mitochondrial [Mus musculus]	4	4	5	0	0	3.89634e+06	0	0	0	4	1
227908837	PECR	NOT_in_TF_list	peroxisomal trans-2-enoyl-CoA reductase [Mus musculus]	2	2	2	0	0	0	3.68983e+06	0	0	0	2
84781793	RCSD1	NOT_in_TF_list	capZ-interacting protein isoform b [Mus musculus]	1	1	2	0	0	0	1.89284e+06	0	0	0	2
254039694	CDC42EP4	NOT_in_TF_list	cdc42 effector protein 4 [Mus musculus]	3	3	4	0	6.03674e+06	0	3.57078e+06	0	1	0	3
224967104	SRSF6	NOT_in_TF_list	arginine/serine-rich splicing factor 6 [Mus musculus]	4	4	6	0	4.76738e+06	568386	2.30904e+06	0	1	1	4
8567384	PBX2	GeneID:5089	pre-B-cell leukemia transcription factor 2 [Mus musculus]	2	3	3	0	2.63993e+06	0	3.86139e+06	0	2	0	1
19526986	ASL	NOT_in_TF_list	argininosuccinate lyase [Mus musculus]	4	4	7	0	4.05661e+06	0	2.55901e+06	0	4	0	3
255958169	MYCS	NOT_in_TF_list	protein S-Myc [Mus musculus]	1	1	1	0	0	0	0	1	0	0	0
71979930	SPECC1	NOT_in_TF_list	cytospin-B [Mus musculus]	8	8	12	0	2.44781e+06	0	3.74786e+06	0	7	0	5
6755202	PSMB3	NOT_in_TF_list	proteasome subunit beta type-3 [Mus musculus]	1	1	1	531430	0	0	0	1	0	0	0
33563282	PSMA1	NOT_in_TF_list	proteasome subunit alpha type-1 [Mus musculus]	2	2	3	388672	0	3.01364e+06	0	1	0	1	1
16716597	HSD17B11	NOT_in_TF_list	estradiol 17-beta-dehydrogenase 11 precursor [Mus musculus]	1	2	2	0	0	1.12522e+06	8.70501e+06	0	0	1	1
84662730	FUBP1	NOT_in_TF_list	far upstream element-binding protein 1 [Mus musculus]	2	5	7	282806	245674	3.12468e+06	956987	1	1	4	1
310616735	H2-Q7	NOT_in_TF_list	H-2 class I histocompatibility antigen, Q7 alpha chain isoform 2 precursor [Mus musculus]	3	3	5	0	4.76197e+06	0	8.95199e+06	0	1	0	4
254540082	PSMB4	NOT_in_TF_list	proteasome subunit beta type-4 precursor [Mus musculus]	2	2	2	298906	0	374228	0	1	0	1	0
48958537	WHSC1L1	NOT_in_TF_list	histone-lysine N-methyltransferase NSD3 isoform 1 [Mus musculus]	5	5	6	0	5.00386e+06	3.11236e+06	1.93229e+06	0	3	2	1
407261134	MisMatch	NOT_in_TF_list	PREDICTED: LOW QUALITY PROTEIN: uncharacterized protein LOC14246 [Mus musculus]	1	1	1	0	0	0	0	1	0	0	0
405778329	MisMatch	NOT_in_TF_list	F-box/WD repeat-containing protein 11 isoform d [Mus musculus]	3	3	3	0	1.0084e+06	3.19344e+06	1.67953e+06	0	1	1	1
231570775	ZC3H14	NOT_in_TF_list	zinc finger CCCH domain-containing protein 14 isoform c [Mus musculus]	4	4	6	0	1.25276e+06	289053	2.403e+06	0	3	1	2
165932326	PDCL	NOT_in_TF_list	phosducin-like protein [Mus musculus]	1	1	1	0	0	0	0	1	0	0	0
347582671	MisMatch	NOT_in_TF_list	indoleamine 2,3-dioxygenase 2 [Mus musculus]	1	1	1	0	9673218	0	0	0	1	0	0
67906177	SEC23A	NOT_in_TF_list	protein transport protein Sec23A [Mus musculus]	5	5	6	0	0	2.23397e+06	0	0	0	6	0
13385006	CYC1	NOT_in_TF_list	cytochrome c1, heme protein, mitochondrial [Mus musculus]	2	2	4	1.35114e+06	0	2.03412e+07	0	1	0	3	0
242332590	OLFR690	NOT_in_TF_list	olfactory receptor 690 [Mus musculus]	1	1	1	0	0	2.62402e+06	0	0	0	1	0
21704176	THUMPD1	NOT_in_TF_list	THUMP domain-containing protein 1 [Mus musculus]	1	1	3	0	2.86865e+07	0	0	0	2	0	1
6755911	TXN1	NOT_in_TF_list	thioredoxin [Mus musculus]	1	1	2	0	0	0	2.90561e+07	0	0	0	2
225543552	FRG1	NOT_in_TF_list	protein FRG1 [Mus musculus]	2	2	2	0	0	3.03787e+06	0	0	0	2	0
163937861	GRWD1	NOT_in_TF_list	glutamate-rich WD repeat-containing protein 1 [Mus musculus]	2	2	3	0	686551	0	2.42926e+06	0	1	0	2
20070392	EXOSC5	NOT_in_TF_list	exosome complex component RRP46 [Mus musculus]	2	2	2	0	0	3.22975e+06	0	0	0	2	0
313151233	2810007J24RIK	NOT_in_TF_list	sulfotransferase-like protein 1 [Mus musculus]	2	2	2	0	0	2.97781e+06	0	0	0	2	0
9055282	MRE11A	NOT_in_TF_list	double-strand break repair protein MRE11A [Mus musculus]	5	5	5	0	0	6.02806e+06	0	0	0	5	0
268370153	PCF11	NOT_in_TF_list	pre-mRNA cleavage complex II protein Pcf11 [Mus musculus]	12	12	13	0	0	1.22572e+06	6.95879e+06	0	0	1	12
33563246	CAST	NOT_in_TF_list	calpastatin [Mus musculus]	3	3	3	0	0	0	3.99331e+06	0	0	0	3
60223081	HS3ST6	NOT_in_TF_list	heparan sulfate glucosamine 3-O-sulfotransferase 6 [Mus musculus]	1	1	1	0	0	0	0	1	0	0	0
55741685	IRX3	GeneID:79191	iroquois-class homeodomain protein IRX-3 isoform 2 [Mus musculus]	2	2	2	0	0	0	0	1	1	0	0
54112427	AEBP2	GeneID:121536	zinc finger protein AEBP2 isoform 1 [Mus musculus]	2	2	2	0	0	0	0	1	0	1	0
84871986	GPX1	NOT_in_TF_list	glutathione peroxidase 1 [Mus musculus]	1	1	1	0	0	824814	0	0	0	1	0
158534069	BANP	NOT_in_TF_list	protein BANP isoform 1 [Mus musculus]	4	4	4	0	0	3.71711e+06	0	0	0	4	0
31982246	D11WSU47E	NOT_in_TF_list	uncharacterized protein C17orf80 homolog [Mus musculus]	3	3	3	0	0	2.5741e+06	0	0	0	3	0
68342040	TMEM201	NOT_in_TF_list	transmembrane protein 201 isoform b [Mus musculus]	1	1	1	0	0	0	0	1	0	0	0
21489933	MAPK3	NOT_in_TF_list	mitogen-activated protein kinase 3 [Mus musculus]	1	1	1	0	0	0	0	1	0	0	0
240120117	GCAT	NOT_in_TF_list	2-amino-3-ketobutyrate coenzyme A ligase, mitochondrial isoform a [Mus musculus]	2	2	2	0	1.89884e+06	0	1.31373e+06	0	1	0	1
112421039	PPL	NOT_in_TF_list	periplakin [Mus musculus]	12	12	12	0	0	0	5.39431e+06	0	0	0	12
119226251	POLR1C	NOT_in_TF_list	DNA-directed RNA polymerases I and III subunit RPAC1 [Mus musculus]	3	3	3	0	2.97887e+06	0	3.89839e+06	0	2	0	1
31560778	RAB30	NOT_in_TF_list	ras-related protein Rab-30 [Mus musculus]	1	2	2	0	0	1.04482e+07	0	0	0	2	0
117956379	TEKT1	NOT_in_TF_list	tektin-1 [Mus musculus]	2	2	2	0	0	1.16272e+07	15210660	0	0	1	1
11230778	TMOD1	NOT_in_TF_list	tropomodulin-1 [Mus musculus]	2	3	10	0	8.23344e+07	2.01651e+06	22844357	0	5	1	4
19526790	MAT1A	NOT_in_TF_list	S-adenosylmethionine synthase isoform type-1 [Mus musculus]	3	3	4	0	3.00785e+06	0	0	0	3	0	1
165972344	NUDT7	NOT_in_TF_list	peroxisomal coenzyme A diphosphatase NUDT7 isoform 2 [Mus musculus]	2	2	4	1.8731e+06	0	6.94022e+06	0	2	0	2	0
21450345	MED17	NOT_in_TF_list	mediator of RNA polymerase II transcription subunit 17 [Mus musculus]	5	5	5	0	0	4.39524e+06	0	0	0	5	0
11230786	IL21R	NOT_in_TF_list	interleukin-21 receptor precursor [Mus musculus]	1	1	1	0	0	0	0	1	0	0	0
189458807	CGN	NOT_in_TF_list	cingulin [Mus musculus]	9	10	15	0	3.32527e+06	0	6.78566e+06	0	3	0	12
247269547	DTNB	NOT_in_TF_list	dystrobrevin beta isoform b [Mus musculus]	3	3	3	0	0	792042	0	0	0	3	0
23956376	INO80E	NOT_in_TF_list	INO80 complex subunit E [Mus musculus]	1	1	2	0	0	0	1556315	0	0	0	2
210032861	NUP37	NOT_in_TF_list	nucleoporin Nup37 [Mus musculus]	2	2	2	0	0	0	3.50406e+06	0	0	0	2
33239110	OLFR470	NOT_in_TF_list	olfactory receptor 470 [Mus musculus]	1	1	1	0	0	0	0	0	0	0	1
239937551	FMO5	NOT_in_TF_list	dimethylaniline monooxygenase [N-oxide-forming] 5 [Mus musculus]	4	4	5	0	1.21833e+06	3.33086e+06	0	0	2	3	0
197333728	ISOC2A	NOT_in_TF_list	isochorismatase domain-containing protein 2A, mitochondrial precursor [Mus musculus]	1	1	1	0	0	821045	0	0	0	1	0
108773813	NUP85	NOT_in_TF_list	nuclear pore complex protein Nup85 [Mus musculus]	4	5	5	0	877346	2.59397e+06	0	0	1	4	0
157057552	EN1	GeneID:2019	homeobox protein engrailed-1 [Mus musculus]	1	1	1	0	0	1.95448e+06	0	0	0	1	0
298493209	CCM2	NOT_in_TF_list	malcavernin isoform 3 [Mus musculus]	2	2	2	0	246557	0	779409	0	1	0	1
148540184	SRFBP1	NOT_in_TF_list	serum response factor-binding protein 1 [Mus musculus]	3	3	4	0	3.65552e+06	1.05755e+06	0	0	3	1	0
157841176	PHF21A	NOT_in_TF_list	PHD finger protein 21A isoform 2 [Mus musculus]	4	4	5	0	2.17969e+06	0	642760	0	4	0	1
359718941	MisMatch	NOT_in_TF_list	E3 ubiquitin-protein ligase Hakai isoform 3 [Mus musculus]	1	2	2	0	1.61807e+07	2.22934e+06	0	0	1	1	0
13385288	CRNKL1	NOT_in_TF_list	crooked neck-like protein 1 [Mus musculus]	6	6	6	0	0	4.70634e+06	0	0	0	6	0
29366816	MED8	NOT_in_TF_list	mediator of RNA polymerase II transcription subunit 8 isoform 2 [Mus musculus]	1	1	1	0	0	1.07355e+06	0	0	0	1	0
50263046	GSTA2	NOT_in_TF_list	glutathione S-transferase A2 [Mus musculus]	1	2	3	2.47769e+06	0	5.66049e+06	0	1	0	2	0
7305247	LYZ1	NOT_in_TF_list	lysozyme C-1 precursor [Mus musculus]	1	1	7	4.36751e+07	0	2.00845e+07	5.17161e+07	3	0	2	2
12963793	1810009J06RIK	NOT_in_TF_list	RIKEN cDNA 1810009J06 precursor [Mus musculus]	1	1	3	0	0	748710	0	1	0	2	0
110347469	PZP	NOT_in_TF_list	alpha-2-macroglobulin precursor [Mus musculus]	10	10	12	0	0	1.41251e+07	4.40886e+06	0	0	10	2
257196228	MAOB	NOT_in_TF_list	amine oxidase [flavin-containing] B [Mus musculus]	3	3	5	0	2.8097e+06	1.74204e+06	6.02465e+06	0	3	1	1
297206826	RAB11FIP1	NOT_in_TF_list	rab11 family-interacting protein 1 isoform 2 [Mus musculus]	4	4	5	0	1.42133e+06	1.64997e+06	0	0	1	4	0
110625954	NDUFV2	NOT_in_TF_list	NADH dehydrogenase [ubiquinone] flavoprotein 2, mitochondrial isoform 1 precursor [Mus musculus]	1	1	1	0	0	846180	0	0	0	1	0
126157499	MYLK	NOT_in_TF_list	myosin light chain kinase, smooth muscle [Mus musculus]	13	13	14	3.11319e+06	0	0	9.83334e+06	1	0	0	13
19527258	ALDH6A1	NOT_in_TF_list	methylmalonate-semialdehyde dehydrogenase [acylating], mitochondrial precursor [Mus musculus]	4	4	5	0	2.60427e+06	0	3.01887e+06	0	4	0	1
7305061	FKBP3	NOT_in_TF_list	peptidyl-prolyl cis-trans isomerase FKBP3 [Mus musculus]	1	1	1	0	0	1.80868e+06	0	0	0	1	0
6677975	TRA2B	NOT_in_TF_list	transformer-2 protein homolog beta [Mus musculus]	2	2	3	0	0	1.18897e+06	1.00542e+07	0	0	1	2
113865977	MFGE8	NOT_in_TF_list	lactadherin isoform 2 precursor [Mus musculus]	3	3	5	0	2.6616e+06	0	2.04464e+06	0	1	0	4
117553604	CES1D	NOT_in_TF_list	carboxylesterase 1D precursor [Mus musculus]	3	4	6	0	0	4.97443e+06	1.06348e+06	0	0	4	2
6678281	INMT	NOT_in_TF_list	indolethylamine N-methyltransferase [Mus musculus]	1	1	2	697224	0	2.74241e+06	0	1	0	1	0
254588014	ETFDH	NOT_in_TF_list	electron transfer flavoprotein-ubiquinone oxidoreductase, mitochondrial precursor [Mus musculus]	5	5	5	0	0	1.61579e+06	0	0	0	5	0
157841168	CCNK	NOT_in_TF_list	cyclin-K [Mus musculus]	3	3	3	0	0	3.37781e+06	0	0	0	3	0
407262435	MisMatch	NOT_in_TF_list	PREDICTED: cohesin subunit SA-2-like [Mus musculus]	7	7	9	0	3.4447e+06	783866	5.24121e+06	0	2	1	6
31982030	ARHGDIA	NOT_in_TF_list	rho GDP-dissociation inhibitor 1 [Mus musculus]	1	1	1	0	0	4.50443e+06	0	0	0	1	0
73611910	NR2F2	GeneID:7026	COUP transcription factor 2 isoform 2 [Mus musculus]	2	2	3	0	4.98361e+06	0	0	0	2	0	1
189458814	CHD5	NOT_in_TF_list	chromodomain helicase DNA binding protein 5 isoform 2 [Mus musculus]	1	13	17	0	4.64666e+06	0	3.7103e+07	0	2	0	15
149267077	LOC100046297	NOT_in_TF_list	PREDICTED: 40S ribosomal protein S26-like [Mus musculus]	1	1	1	0	0	0	0	0	0	1	0
115270960	BAG3	NOT_in_TF_list	BAG family molecular chaperone regulator 3 [Mus musculus]	3	4	4	0	2.07887e+07	1.73944e+06	0	0	1	3	0
9055218	PRPF40A	NOT_in_TF_list	pre-mRNA-processing factor 40 homolog A [Mus musculus]	7	7	11	0	2.55049e+06	0	8.26574e+06	0	5	0	6
270341361	SHOC2	NOT_in_TF_list	leucine-rich repeat protein SHOC-2 [Mus musculus]	5	5	7	0	0	1.27112e+07	0	0	0	7	0
145386524	NBN	NOT_in_TF_list	nibrin [Mus musculus]	5	5	7	0	3.60543e+06	0	1.48832e+06	0	4	0	3
21312260	ALDH1B1	NOT_in_TF_list	aldehyde dehydrogenase X, mitochondrial precursor [Mus musculus]	2	3	5	0	5.30586e+06	1.92392e+06	2.44296e+07	0	3	1	1
162135966	COBL	NOT_in_TF_list	protein cordon-bleu [Mus musculus]	8	8	9	0	0	0	4.63947e+06	0	0	0	9
13195604	RPS23	NOT_in_TF_list	40S ribosomal protein S23 [Mus musculus]	1	1	1	0	0	0	3.7584e+06	0	0	0	1
188528622	ACTR8	NOT_in_TF_list	actin-related protein 8 [Mus musculus]	4	4	6	0	0	3.95939e+06	0	0	0	6	0
226823367	FH1	NOT_in_TF_list	fumarate hydratase, mitochondrial precursor [Mus musculus]	2	2	2	0	0	0	1.92015e+06	0	0	0	2
30425020	SLC25A41	NOT_in_TF_list	solute carrier family 25 member 41 [Mus musculus]	1	1	1	0	0	0	0	1	0	0	0
6677739	RGN	NOT_in_TF_list	regucalcin [Mus musculus]	2	2	4	0	424051	2.19599e+06	1.67498e+06	1	1	1	1
254553274	ZFP746	GeneID:155061	zinc finger protein 746 [Mus musculus]	2	2	6	0	0	0	0	6	0	0	0
289577057	OLFR464	NOT_in_TF_list	olfactory receptor 464 [Mus musculus]	1	1	1	0	0	0	0	0	0	1	0
21312402	LENG1	NOT_in_TF_list	leukocyte receptor cluster member 1 homolog [Mus musculus]	2	2	2	0	0	0	974814	0	0	0	2
22094989	TIMM50	NOT_in_TF_list	mitochondrial import inner membrane translocase subunit TIM50 precursor [Mus musculus]	2	2	2	0	0	0	3.7054e+06	0	0	0	2
6679943	GAS2	NOT_in_TF_list	growth arrest-specific protein 2 [Mus musculus]	2	2	3	0	0	1.45785e+06	6.8656e+06	0	0	1	2
285403538	DHRS7B	NOT_in_TF_list	dehydrogenase/reductase SDR family member 7B isoform 1 [Mus musculus]	1	1	1	0	0	1.59187e+06	0	0	0	1	0
13122606	TFPT	NOT_in_TF_list	TCF3 fusion partner homolog [Mus musculus]	1	1	1	0	667004	0	0	0	1	0	0
117553621	TRIB3	NOT_in_TF_list	tribbles homolog 3 [Mus musculus]	2	2	4	0	3.59032e+06	0	1.70776e+06	0	2	0	2
31543047	KPNA1	NOT_in_TF_list	importin subunit alpha-1 [Mus musculus]	3	3	3	0	0	1.15898e+06	0	0	0	3	0
6681095	CYCS	NOT_in_TF_list	cytochrome c, somatic [Mus musculus]	1	1	1	0	0	540302	0	0	0	1	0
82617575	EPRS	NOT_in_TF_list	bifunctional glutamate/proline--tRNA ligase [Mus musculus]	7	7	7	0	0	0	4.05917e+06	0	0	0	7
75677510	GTF3C3	NOT_in_TF_list	general transcription factor 3C polypeptide 3 [Mus musculus]	6	6	8	0	1.49987e+06	0	1.33668e+06	0	4	0	4
118130981	KRT12	NOT_in_TF_list	keratin, type I cytoskeletal 12 [Mus musculus]	1	1	1	0	0	0	0	1	0	0	0
46575916	HNF4A	GeneID:3172	hepatocyte nuclear factor 4-alpha [Mus musculus]	3	3	5	0	5.81784e+06	0	7.4062e+06	0	2	0	3
6755442	SDC4	NOT_in_TF_list	syndecan-4 precursor [Mus musculus]	1	1	1	0	0	0	687152	0	0	0	1
10257421	CETN2	NOT_in_TF_list	centrin-2 [Mus musculus]	1	1	1	0	0	537702	0	0	0	1	0
85861260	C230096C10RIK	NOT_in_TF_list	ER membrane protein complex subunit 1 isoform 2 precursor [Mus musculus]	5	5	7	0	2.5102e+06	0	2.58536e+06	0	2	0	5
9506367	ABCB10	NOT_in_TF_list	ATP-binding cassette sub-family B member 10, mitochondrial precursor [Mus musculus]	4	4	4	0	0	1.36926e+06	0	0	0	4	0
6755596	SNRPC	NOT_in_TF_list	U1 small nuclear ribonucleoprotein C [Mus musculus]	1	1	1	0	0	497788	0	0	0	1	0
227116292	DPP4	NOT_in_TF_list	dipeptidyl peptidase 4 isoform 2 [Mus musculus]	5	5	5	0	1.67139e+06	0	1.65958e+06	0	3	0	2
254939694	U2AF1	NOT_in_TF_list	splicing factor U2AF 35 kDa subunit isoform 1 [Mus musculus]	1	1	1	0	0	0	0	0	0	0	1
298919223	FAU	NOT_in_TF_list	40S ribosomal protein S30 precursor [Mus musculus]	1	1	6	9.18487e+06	2.60996e+06	8.05127e+06	3.6291e+06	2	1	2	1
158853994	LIPT1	NOT_in_TF_list	lipoyltransferase 1, mitochondrial precursor [Mus musculus]	2	2	2	0	0	0	1.02971e+06	0	0	0	2
7110681	PBX1	GeneID:5087	pre-B-cell leukemia transcription factor 1 isoform b [Mus musculus]	1	2	2	0	2931527	0	0	0	2	0	0
67763822	HLTF	NOT_in_TF_list	helicase-like transcription factor isoform 2 [Mus musculus]	4	4	9	1.68613e+06	2.645e+06	0	2.90094e+06	3	5	0	1
9507153	STK19	NOT_in_TF_list	serine/threonine-protein kinase 19 [Mus musculus]	2	2	2	0	0	1.35326e+06	0	0	0	2	0
63999479	SLC22A17	NOT_in_TF_list	solute carrier family 22 member 17 [Mus musculus]	1	1	1	0	0	0	0	1	0	0	0
61742831	CCDC120	NOT_in_TF_list	coiled-coil domain containing 120 [Mus musculus]	1	1	1	0	0	0	0	1	0	0	0
6753448	TPP1	NOT_in_TF_list	tripeptidyl-peptidase 1 precursor [Mus musculus]	3	3	9	0	1.15947e+07	882313	1.26966e+07	0	3	1	5
148747198	CARS	NOT_in_TF_list	cysteine--tRNA ligase, cytoplasmic isoform 1 [Mus musculus]	6	6	8	0	2981678	5.28211e+06	3.33376e+06	0	3	3	2
21426825	TSSK3	NOT_in_TF_list	testis-specific serine/threonine-protein kinase 3 [Mus musculus]	1	1	2	0	0	0	0	0	0	2	0
9789997	LETM1	NOT_in_TF_list	LETM1 and EF-hand domain-containing protein 1, mitochondrial precursor [Mus musculus]	5	5	7	0	1.38429e+06	758709	1.9947e+06	0	2	1	4
261824000	PSMA3	NOT_in_TF_list	proteasome subunit alpha type-3 [Mus musculus]	2	2	2	0	0	2.69673e+06	0	0	0	2	0
6678680	LFNG	NOT_in_TF_list	beta-1,3-N-acetylglucosaminyltransferase lunatic fringe precursor [Mus musculus]	1	1	1	0	0	0	0	0	0	1	0
126722757	PISD	NOT_in_TF_list	phosphatidylserine decarboxylase proenzyme [Mus musculus]	2	2	2	0	0	0	1.68287e+06	0	0	0	2
27501448	EIF6	NOT_in_TF_list	eukaryotic translation initiation factor 6 [Mus musculus]	1	1	1	0	0	521840	0	0	0	1	0
6680806	BPGM	NOT_in_TF_list	bisphosphoglycerate mutase [Mus musculus]	2	2	2	0	0	5.92684e+06	0	0	0	2	0
46852276	DHX29	NOT_in_TF_list	ATP-dependent RNA helicase Dhx29 [Mus musculus]	8	8	9	0	0	0	4.52908e+06	0	1	0	8
125628646	ANKRD43	NOT_in_TF_list	ankyrin repeat domain-containing protein SOWAHA precursor [Mus musculus]	2	2	2	0	0	0	0	2	0	0	0
61888900	THOC7	NOT_in_TF_list	THO complex subunit 7 homolog isoform 2 [Mus musculus]	1	1	1	0	0	0	0	0	0	1	0
111120329	COL1A2	NOT_in_TF_list	collagen alpha-2(I) chain precursor [Mus musculus]	2	3	4	0	0	0	0	4	0	0	0
110347535	HNRPLL	NOT_in_TF_list	heterogeneous nuclear ribonucleoprotein L-like [Mus musculus]	3	3	3	1.24476e+06	0	585467	0	2	0	1	0
160333195	ECI2	NOT_in_TF_list	enoyl-CoA delta isomerase 2, mitochondrial isoform b [Mus musculus]	2	2	2	0	0	0	2.0714e+06	0	0	0	2
6679182	ORM1	NOT_in_TF_list	alpha-1-acid glycoprotein 1 precursor [Mus musculus]	1	1	1	0	0	0	5.51549e+06	0	0	0	1
29789128	MRPS30	NOT_in_TF_list	28S ribosomal protein S30, mitochondrial [Mus musculus]	3	3	3	0	1.33931e+06	0	0	0	3	0	0
168693635	NAGA	NOT_in_TF_list	alpha-N-acetylgalactosaminidase precursor [Mus musculus]	2	2	2	0	3.91258e+06	0	1.06258e+06	0	1	0	1
238018071	FOXK2	GeneID:3607	forkhead box protein K2 [Mus musculus]	4	4	4	0	0	1.73654e+06	0	1	0	2	1
102468565	TXNRD2	NOT_in_TF_list	thioredoxin reductase 2, mitochondrial precursor [Mus musculus]	1	1	1	0	0	0	0	0	0	1	0
13386414	CYP2D26	NOT_in_TF_list	cytochrome P450 2D26 [Mus musculus]	2	3	3	0	720827	0	0	0	3	0	0
148271073	MYADM	NOT_in_TF_list	myeloid-associated differentiation marker [Mus musculus]	2	2	3	0	272783	3.26493e+06	0	0	1	2	0
34447211	RAD23A	NOT_in_TF_list	UV excision repair protein RAD23 homolog A [Mus musculus]	1	3	4	0	3.63873e+07	8.61764e+07	1.70955e+06	0	1	2	1
309267227	LOC100048268	NOT_in_TF_list	PREDICTED: DNA-binding protein RFXANK-like, partial [Mus musculus]	1	1	1	0	0	0	1.97694e+06	0	0	0	1
31980806	PGRMC1	NOT_in_TF_list	membrane-associated progesterone receptor component 1 [Mus musculus]	1	1	1	0	0	0	0	0	0	1	0
78711834	AKAP2	NOT_in_TF_list	A-kinase anchor protein 2 isoform 2 [Mus musculus]	5	5	8	0	2.36434e+06	0	9.44551e+06	0	1	0	7
46592877	CCNL2	NOT_in_TF_list	cyclin-L2 [Mus musculus]	1	1	1	0	0	0	0	1	0	0	0
84697031	TMOD2	NOT_in_TF_list	tropomodulin-2 [Mus musculus]	1	3	13	0	1.63277e+08	2.01651e+06	1.42032e+08	0	5	3	5
31088894	GTF2H3	NOT_in_TF_list	general transcription factor IIH subunit 3 [Mus musculus]	2	2	3	0	0	0	2.86754e+06	0	0	0	3
28849885	FAM76B	NOT_in_TF_list	protein FAM76B [Mus musculus]	2	2	2	0	0	0	1.03264e+06	0	0	0	2
66730553	NUFIP2	NOT_in_TF_list	nuclear fragile X mental retardation-interacting protein 2 [Mus musculus]	4	4	4	0	0	4.12384e+06	0	0	0	4	0
283945579	H2AFY	NOT_in_TF_list	core histone macro-H2A.1 isoform 4 [Mus musculus]	2	2	3	0	0	0	2.93569e+06	0	0	0	3
112983594	OLFR1218	NOT_in_TF_list	olfactory receptor 1218 [Mus musculus]	1	1	1	0	0	1.05165e+08	0	0	0	1	0
34328130	HCFC1	NOT_in_TF_list	host cell factor 1 [Mus musculus]	11	11	27	0	7.83786e+06	0	1.09378e+07	0	11	0	16
356460937	MisMatch	NOT_in_TF_list	leucine-rich repeat and calponin homology domain-containing protein 1 isoform 2 [Mus musculus]	3	3	4	0	867600	491610	0	0	2	2	0
114326474	SLC1A5	NOT_in_TF_list	neutral amino acid transporter B(0) [Mus musculus]	1	1	1	0	0	0	0	1	0	0	0
89242139	ARHGAP12	NOT_in_TF_list	rho GTPase-activating protein 12 isoform 2 [Mus musculus]	4	4	4	0	0	0	3.48205e+06	0	0	0	4
31982546	CDT1	NOT_in_TF_list	DNA replication factor Cdt1 [Mus musculus]	1	1	3	0	0	0	0	3	0	0	0
114431256	POU2F1	GeneID:5451	POU domain, class 2, transcription factor 1 isoform L [Mus musculus]	4	4	6	0	2.24095e+06	628419	2.15975e+06	0	3	1	2
37718989	GMEB2	GeneID:26205	glucocorticoid modulatory element-binding protein 2 [Mus musculus]	1	1	2	0	0	0	0	2	0	0	0
41350312	NACA	NOT_in_TF_list	nascent polypeptide-associated complex subunit alpha isoform b [Mus musculus]	1	1	1	0	0	0	503895	0	0	0	1
18158420	CAMK2D	NOT_in_TF_list	calcium/calmodulin-dependent protein kinase type II subunit delta isoform 3 [Mus musculus]	2	3	7	0	4.21068e+06	0	3.45344e+06	0	3	0	4
110625591	RBM22	NOT_in_TF_list	pre-mRNA-splicing factor RBM22 [Mus musculus]	3	3	3	0	0	0	2.66367e+06	0	0	0	3
12963511	RPS19	NOT_in_TF_list	40S ribosomal protein S19 [Mus musculus]	1	1	2	0	0	793074	291345	0	0	1	1
34328230	AK2	NOT_in_TF_list	adenylate kinase 2, mitochondrial isoform b [Mus musculus]	1	1	1	0	0	3.13086e+06	0	0	0	1	0
118130771	PTPN6	NOT_in_TF_list	tyrosine-protein phosphatase non-receptor type 6 isoform a [Mus musculus]	3	3	3	0	0	1.27495e+06	0	0	0	3	0
144922627	NCBP1	NOT_in_TF_list	nuclear cap-binding protein subunit 1 [Mus musculus]	5	5	7	0	2.52693e+06	2.32704e+06	0	0	3	4	0
10946572	FABP7	NOT_in_TF_list	fatty acid-binding protein, brain [Mus musculus]	1	1	1	0	0	0	3.88832e+06	0	0	0	1
12963595	NDNL2	NOT_in_TF_list	melanoma-associated antigen G1 [Mus musculus]	2	2	2	0	0	1.35362e+06	0	0	0	2	0
30424571	8430410A17RIK	NOT_in_TF_list	UPF0361 protein C3orf37 homolog [Mus musculus]	2	2	2	5.28797e+06	0	0	544325	1	0	0	1
165932341	CELA1	NOT_in_TF_list	chymotrypsin-like elastase family member 1 precursor [Mus musculus]	1	1	1	0	0	0	0	0	0	1	0
442535508	MisMatch	NOT_in_TF_list	fatty acid-binding protein, epidermal isoform 2 [Mus musculus]	1	1	2	0	0	4.91814e+06	1.5744e+07	0	0	1	1
30519927	REEP3	NOT_in_TF_list	receptor expression-enhancing protein 3 isoform 2 [Mus musculus]	2	2	2	0	0	1.49614e+06	0	0	0	2	0
260166719	CKAP5	NOT_in_TF_list	cytoskeleton-associated protein 5 isoform 2 [Mus musculus]	10	10	11	0	556714	4.83202e+06	6.01742e+06	0	1	1	9
31982701	DNAJB12	NOT_in_TF_list	dnaJ homolog subfamily B member 12 [Mus musculus]	2	2	2	0	557198	0	0	0	1	0	1
30794412	TAF15	NOT_in_TF_list	TATA-binding protein-associated factor 2N [Mus musculus]	1	3	7	0	5.24182e+06	5.09214e+07	8.86334e+06	0	1	4	2
23956104	AK3	NOT_in_TF_list	GTP:AMP phosphotransferase AK3, mitochondrial [Mus musculus]	1	1	1	0	0	1.95516e+06	0	0	0	1	0
19527056	CLP1	NOT_in_TF_list	polyribonucleotide 5'-hydroxyl-kinase Clp1 [Mus musculus]	3	3	3	0	4.16555e+06	0	7.26474e+06	0	2	0	1
160333268	ZFP703	NOT_in_TF_list	zinc finger protein 703 isoform 1 [Mus musculus]	1	1	1	0	0	0	0	1	0	0	0
225690618	ACOT7	NOT_in_TF_list	cytosolic acyl coenzyme A thioester hydrolase isoform 3 [Mus musculus]	2	2	3	0	1.74796e+06	0	4.61648e+06	0	2	0	1
20149738	SOCS7	NOT_in_TF_list	suppressor of cytokine signaling 7 [Mus musculus]	1	1	1	0	0	0	0	1	0	0	0
26024213	ARX	GeneID:170302	homeobox protein ARX [Mus musculus]	1	1	1	0	0	0	0	1	0	0	0
18875338	CSTF2	NOT_in_TF_list	cleavage stimulation factor subunit 2 [Mus musculus]	2	4	4	0	0	3.87719e+06	0	0	0	4	0
41152116	LRRC47	NOT_in_TF_list	leucine-rich repeat-containing protein 47 [Mus musculus]	3	3	3	0	0	1.4199e+06	0	0	0	3	0
20149748	SARDH	NOT_in_TF_list	sarcosine dehydrogenase, mitochondrial [Mus musculus]	5	5	6	0	1.22445e+06	0	1.41831e+06	0	2	0	4
124487127	EXOSC7	NOT_in_TF_list	exosome complex exonuclease RRP42 [Mus musculus]	2	2	3	0	0	0	2.92126e+06	0	0	0	3
226874916	CES3B	NOT_in_TF_list	carboxylesterase 3B isoform 2 precursor [Mus musculus]	1	3	3	0	0	1.58794e+06	0	0	0	3	0
28201989	FBXO28	NOT_in_TF_list	F-box only protein 28 [Mus musculus]	2	2	2	0	298517	0	2.29535e+06	0	1	0	1
22122515	AHSA1	NOT_in_TF_list	activator of 90 kDa heat shock protein ATPase homolog 1 [Mus musculus]	1	1	2	0	2.53299e+06	0	5.00623e+06	0	1	0	1
257743054	CES3A	NOT_in_TF_list	carboxylesterase 3A isoform 2 precursor [Mus musculus]	1	3	3	0	0	2.29537e+06	0	0	0	3	0
6681079	CTSB	NOT_in_TF_list	cathepsin B preproprotein [Mus musculus]	2	2	2	0	0	5.79994e+06	0	0	0	2	0
407263560	MisMatch	NOT_in_TF_list	PREDICTED: transmembrane emp24 domain-containing protein 2-like [Mus musculus]	1	1	1	0	3.86301e+06	0	0	0	1	0	0
112420990	PNN	NOT_in_TF_list	pinin [Mus musculus]	4	4	4	0	890858	317675	2.97843e+06	0	1	1	2
19526822	SULT1A1	NOT_in_TF_list	sulfotransferase 1A1 [Mus musculus]	1	1	1	0	0	219867	0	0	0	1	0
255982548	NRF1	GeneID:4899	nuclear respiratory factor 1 isoform c [Mus musculus]	3	3	3	0	0	8.97508e+06	0	0	0	3	0
260099647	AVEN	NOT_in_TF_list	cell death regulator Aven isoform 2 [Mus musculus]	1	1	1	0	0	0	1.49573e+06	0	0	0	1
85861162	AIFM2	NOT_in_TF_list	apoptosis-inducing factor 2 isoform 2 [Mus musculus]	2	2	2	0	0	0	1.42723e+06	0	0	0	2
254588102	NUP153	NOT_in_TF_list	nucleoporin 153 [Mus musculus]	7	7	8	0	1.39624e+06	0	5.9783e+06	0	1	0	7
19705424	PSMD3	NOT_in_TF_list	26S proteasome non-ATPase regulatory subunit 3 [Mus musculus]	3	3	3	0	0	1.2629e+06	0	0	0	3	0
283806543	NUP133	NOT_in_TF_list	nuclear pore complex protein Nup133 [Mus musculus]	5	5	6	0	2.05303e+06	0	2.40091e+06	0	4	0	2
31542427	CSNK2A1	NOT_in_TF_list	casein kinase II subunit alpha [Mus musculus]	2	2	2	0	0	0	2.07301e+06	0	0	0	2
83582792	FAM117B	NOT_in_TF_list	protein FAM117B [Mus musculus]	1	1	1	0	0	0	0	1	0	0	0
117647238	ZBTB7A	GeneID:51341	zinc finger and BTB domain-containing protein 7A [Mus musculus]	2	2	2	0	0	1.93935e+06	0	0	0	2	0
166063959	C330007P06RIK	NOT_in_TF_list	UPF0428 protein CXorf56 homolog [Mus musculus]	1	1	1	0	0	1.4283e+06	0	0	0	1	0
124001560	CYP2F2	NOT_in_TF_list	cytochrome P450 2F2 precursor [Mus musculus]	3	3	4	0	1.88933e+06	0	1.51831e+06	0	2	0	2
31980762	SOD2	NOT_in_TF_list	superoxide dismutase [Mn], mitochondrial precursor [Mus musculus]	1	1	1	0	0	0	0	0	0	1	0
171460908	2610101N10RIK	NOT_in_TF_list	U2 snRNP-associated SURP motif-containing protein isoform 2 [Mus musculus]	6	6	10	0	3.24319e+06	1.30579e+06	1.08771e+07	0	3	1	6
30725780	MAL2	NOT_in_TF_list	protein MAL2 [Mus musculus]	1	1	2	0	0	7.00094e+06	769534	0	0	1	1
115392140	1190002N15RIK	NOT_in_TF_list	deleted in autism protein 1 homolog [Mus musculus]	2	2	2	0	1.78936e+06	0	0	0	2	0	0
56550079	CGNL1	NOT_in_TF_list	cingulin-like protein 1 [Mus musculus]	7	8	8	0	0	0	3.6362e+06	0	0	0	8
227116289	COL9A2	NOT_in_TF_list	collagen alpha-2(IX) chain precursor [Mus musculus]	1	1	1	0	0	0	0	1	0	0	0
257096024	ACNAT1	NOT_in_TF_list	acyl-coenzyme A amino acid N-acyltransferase 1 [Mus musculus]	2	2	3	0	1.29913e+06	0	1.93921e+06	0	1	0	2
6754474	KPNA2	NOT_in_TF_list	importin subunit alpha-2 [Mus musculus]	2	2	2	0	0	0	778871	0	0	0	2
254028217	ADCK3	NOT_in_TF_list	chaperone activity of bc1 complex-like, mitochondrial [Mus musculus]	3	3	4	0	0	3.6446e+06	2.65979e+06	0	0	3	1
124487435	NCCRP1	NOT_in_TF_list	F-box only protein 50 [Mus musculus]	2	2	2	1.28993e+06	0	0	0	2	0	0	0
157823795	KIF21A	NOT_in_TF_list	kinesin-like protein KIF21A isoform 4 [Mus musculus]	7	7	8	0	0	4.50517e+06	3.30121e+06	0	0	1	7
115334671	ALDH9A1	NOT_in_TF_list	4-trimethylaminobutyraldehyde dehydrogenase precursor [Mus musculus]	3	3	3	602677	1.10178e+06	0	2.20726e+06	1	1	0	1
253795509	RNF20	NOT_in_TF_list	E3 ubiquitin-protein ligase BRE1A [Mus musculus]	4	5	5	0	1.5427e+06	0	1.88234e+06	0	3	0	2
146134497	MPND	NOT_in_TF_list	MPN domain-containing protein [Mus musculus]	1	1	1	0	0	0	0	1	0	0	0
61656180	UTP18	NOT_in_TF_list	U3 small nucleolar RNA-associated protein 18 homolog [Mus musculus]	3	3	3	0	0	2.59687e+06	0	0	0	3	0
6755674	STAU1	NOT_in_TF_list	double-stranded RNA-binding protein Staufen homolog 1 isoform 3 [Mus musculus]	2	2	3	0	867734	304265	1.22063e+06	0	1	1	1
145207992	DIS3	NOT_in_TF_list	exosome complex exonuclease RRP44 [Mus musculus]	5	5	6	0	1.57526e+06	0	1.6411e+06	0	3	0	3
22128625	MRPL37	NOT_in_TF_list	39S ribosomal protein L37, mitochondrial precursor [Mus musculus]	2	2	2	0	0	0	803346	0	0	0	2
6678581	WAS	NOT_in_TF_list	wiskott-Aldrich syndrome protein homolog [Mus musculus]	1	1	1	0	0	0	0	1	0	0	0
6678521	USF1	GeneID:7391	upstream stimulatory factor 1 [Mus musculus]	1	2	3	0	3.71061e+06	0	2.12591e+06	0	2	0	1
33186868	ZFP503	NOT_in_TF_list	zinc finger protein 503 [Mus musculus]	1	1	1	0	0	0	0	1	0	0	0
113930708	MUP5	NOT_in_TF_list	major urinary protein 5 precursor [Mus musculus]	1	1	1	996443	0	0	0	1	0	0	0
22122547	SOAT2	NOT_in_TF_list	sterol O-acyltransferase 2 [Mus musculus]	1	1	1	0	0	0	576935	0	0	0	1
19482166	KEG1	NOT_in_TF_list	glycine N-acyltransferase-like protein Keg1 [Mus musculus]	2	2	3	1.00843e+06	0	0	2.97026e+06	2	0	0	1
256367522	PLEC	NOT_in_TF_list	plectin isoform 1hij [Mus musculus]	14	15	17	0	0	994617	3.64473e+06	0	0	1	16
226443083	2310014H01RIK	NOT_in_TF_list	phostensin [Mus musculus]	2	2	2	0	32091	0	0	1	1	0	0
33859809	FGB	NOT_in_TF_list	fibrinogen beta chain precursor [Mus musculus]	3	3	3	0	2.28423e+06	0	0	0	3	0	0
124487061	PALLD	NOT_in_TF_list	palladin [Mus musculus]	7	7	9	0	7.55884e+06	355441	5.71634e+06	0	6	1	2
6680502	ITM2B	NOT_in_TF_list	integral membrane protein 2B [Mus musculus]	1	1	2	5.21059e+07	0	0	5.13612e+07	1	0	0	1
282398110	KRT82	NOT_in_TF_list	keratin, type II cuticular Hb2 [Mus musculus]	3	4	11	1.40244e+08	0	0	920567	10	0	0	1
255918178	MCRS1	NOT_in_TF_list	microspherule protein 1 isoform 2 [Mus musculus]	1	1	2	0	3.08556e+06	0	4.68509e+06	0	1	0	1
15628025	TCFCP2	GeneID:7024	alpha-globin transcription factor CP2 [Mus musculus]	1	2	3	0	0	2.19708e+07	0	0	0	3	0
124249090	KRT80	NOT_in_TF_list	keratin, type II cytoskeletal 80 [Mus musculus]	3	3	7	3.05464e+06	2.04753e+06	1.38995e+06	8610343	2	1	1	3
170763467	TIMM44	NOT_in_TF_list	mitochondrial import inner membrane translocase subunit TIM44 [Mus musculus]	2	2	2	0	867314	0	4.1865e+06	0	1	0	1
170172562	SERPINE1	NOT_in_TF_list	plasminogen activator inhibitor 1 precursor [Mus musculus]	2	2	2	0	0	0	1.48748e+06	0	0	0	2
407262287	MisMatch	NOT_in_TF_list	PREDICTED: 60S ribosomal protein L23-like [Mus musculus]	1	1	1	0	1.55329e+06	0	0	0	1	0	0
31982219	RELT	NOT_in_TF_list	tumor necrosis factor receptor superfamily member 19L precursor [Mus musculus]	1	1	2	0	0	0	835506	0	0	0	2
6678407	TPD52	NOT_in_TF_list	tumor protein D52 isoform 5 [Mus musculus]	1	1	3	0	0	0	9.68012e+06	0	0	0	3
21362285	WDR33	NOT_in_TF_list	pre-mRNA 3' end processing protein WDR33 isoform 1 [Mus musculus]	6	6	7	1.75786e+06	0	0	642376	5	0	0	2
144922656	LLGL2	NOT_in_TF_list	lethal(2) giant larvae protein homolog 2 isoform 1 [Mus musculus]	5	5	7	0	2.79044e+06	0	2.83238e+06	0	1	0	6
30519997	BLMH	NOT_in_TF_list	bleomycin hydrolase [Mus musculus]	3	3	4	0	0	1.31801e+06	2.61369e+06	0	0	2	2
357197160	MisMatch	NOT_in_TF_list	protein arginine N-methyltransferase 1 isoform 3 [Mus musculus]	1	1	2	0	1.16695e+06	0	0	0	1	0	1
164607150	DYRK1A	NOT_in_TF_list	dual specificity tyrosine-phosphorylation-regulated kinase 1A [Mus musculus]	1	1	1	0	0	0	0	1	0	0	0
56699425	NLGN2	NOT_in_TF_list	neuroligin-2 precursor [Mus musculus]	1	1	1	0	0	0	0	1	0	0	0
33859751	RAB21	NOT_in_TF_list	ras-related protein Rab-21 [Mus musculus]	1	1	1	0	0	0	0	1	0	0	0
22507323	GTF3C5	NOT_in_TF_list	general transcription factor 3C polypeptide 5 [Mus musculus]	3	3	3	0	0	1.79742e+06	0	0	0	3	0
157909820	DLG4	NOT_in_TF_list	disks large homolog 4 isoform 2 [Mus musculus]	1	1	1	0	0	0	0	1	0	0	0
46593021	UQCRC1	NOT_in_TF_list	cytochrome b-c1 complex subunit 1, mitochondrial precursor [Mus musculus]	1	2	2	0	0	0	2.99502e+06	0	0	0	2
122937355	MARK2	NOT_in_TF_list	serine/threonine-protein kinase MARK2 isoform 2 [Mus musculus]	3	3	5	0	0	3.62317e+06	660053	0	0	4	1
19526814	NDUFV1	NOT_in_TF_list	NADH dehydrogenase [ubiquinone] flavoprotein 1, mitochondrial precursor [Mus musculus]	1	1	2	0	4.41888e+06	0	8.62797e+06	0	1	0	1
295054316	NSUN2	NOT_in_TF_list	tRNA (cytosine(34)-C(5))-methyltransferase [Mus musculus]	4	4	4	0	0	0	3.06522e+06	0	0	0	4
110347527	PRDM8	NOT_in_TF_list	PR domain zinc finger protein 8 [Mus musculus]	1	1	1	0	0	0	0	1	0	0	0
12963729	INO80B	NOT_in_TF_list	INO80 complex subunit B [Mus musculus]	2	2	3	0	0	4.10257e+06	3.47971e+06	0	0	1	2
254553412	C130039O16RIK	NOT_in_TF_list	uncharacterized protein LOC238317 [Mus musculus]	4	4	4	0	1.74138e+06	0	1.29449e+06	0	1	0	3
226423873	DBNL	NOT_in_TF_list	drebrin-like protein isoform 3 [Mus musculus]	2	2	3	0	1.3953e+06	0	889491	0	1	0	2
27369800	KLHL11	NOT_in_TF_list	kelch-like protein 11 precursor [Mus musculus]	1	1	1	0	0	0	0	0	0	1	0
293597569	ALDOA	NOT_in_TF_list	fructose-bisphosphate aldolase A isoform 2 [Mus musculus]	1	2	3	1.00162e+06	0	0	2.0758e+06	1	0	0	2
329755292	MisMatch	NOT_in_TF_list	mitochondrial antiviral-signaling protein isoform 1 [Mus musculus]	2	2	2	0	0	545817	0	0	0	2	0
32189438	TCEA3	NOT_in_TF_list	transcription elongation factor A protein 3 [Mus musculus]	2	2	2	0	0	0	3.79542e+06	0	0	0	2
170295818	BAZ1B	NOT_in_TF_list	tyrosine-protein kinase BAZ1B [Mus musculus]	7	7	7	0	0	0	2.05191e+06	0	0	0	7
21624627	SNRNP35	NOT_in_TF_list	U11/U12 small nuclear ribonucleoprotein 35 kDa protein [Mus musculus]	1	1	1	0	0	0	0	0	0	1	0
110625761	AFG3L2	NOT_in_TF_list	AFG3-like protein 2 [Mus musculus]	4	5	5	0	1.63234e+06	1.81268e+06	2.76405e+06	0	2	2	1
224922832	FUBP3	NOT_in_TF_list	far upstream element (FUSE) binding protein 3 [Mus musculus]	2	4	4	0	0	1.89989e+06	1.71566e+06	0	0	3	1
18252784	FTCD	NOT_in_TF_list	formimidoyltransferase-cyclodeaminase [Mus musculus]	1	1	2	0	0	0	0	2	0	0	0
6754524	LDHA	NOT_in_TF_list	L-lactate dehydrogenase A chain isoform 1 [Mus musculus]	2	2	2	0	0	0	4.88495e+06	0	0	0	2
116268125	CYP2C29	NOT_in_TF_list	cytochrome P450 2C29 precursor [Mus musculus]	2	3	5	0	2.07895e+06	0	2.66238e+06	0	2	0	3
7304861	ADD1	NOT_in_TF_list	alpha-adducin isoform 2 [Mus musculus]	3	3	3	0	0	0	2.43957e+06	0	0	0	3
126722910	SNX27	NOT_in_TF_list	sorting nexin-27 isoform 2 [Mus musculus]	1	1	1	0	0	0	0	1	0	0	0
39930509	MAPRE3	NOT_in_TF_list	microtubule-associated protein RP/EB family member 3 [Mus musculus]	1	1	1	0	0	0	0	0	0	1	0
89179318	KRT40	NOT_in_TF_list	keratin, type I cytoskeletal 40 [Mus musculus]	1	3	22	6.59528e+08	2.2804e+09	1.04961e+09	3.33136e+09	8	3	3	8
21312614	CPSF3L	NOT_in_TF_list	integrator complex subunit 11 [Mus musculus]	3	3	3	0	0	2.24897e+06	0	0	0	3	0
58037235	OXSM	NOT_in_TF_list	3-oxoacyl-[acyl-carrier-protein] synthase, mitochondrial precursor [Mus musculus]	1	1	1	2.43905e+06	0	0	0	1	0	0	0
86476059	WDR37	NOT_in_TF_list	WD repeat-containing protein 37 isoform a [Mus musculus]	2	2	2	0	0	1.0672e+06	0	0	0	2	0
6756051	ZFP207	NOT_in_TF_list	zinc finger protein 207 isoform 4 [Mus musculus]	2	2	5	0	1.03065e+07	1.47319e+07	3.04343e+07	0	1	2	2
6754152	HAL	NOT_in_TF_list	histidine ammonia-lyase [Mus musculus]	4	4	5	1.27808e+06	0	1.28668e+06	3.55633e+06	2	0	1	2
13775156	XBP1	GeneID:7494	X-box-binding protein 1 isoform XBP1(U) [Mus musculus]	1	1	1	0	0	2.05356e+06	0	0	0	1	0
9790153	PEX14	NOT_in_TF_list	peroxisomal membrane protein PEX14 [Mus musculus]	2	2	4	0	0	3.18866e+06	1.66403e+06	0	0	2	2
6754036	GOT2	NOT_in_TF_list	aspartate aminotransferase, mitochondrial [Mus musculus]	2	2	2	0	0	0	2.97716e+06	0	0	0	2
124486706	HPGD	NOT_in_TF_list	15-hydroxyprostaglandin dehydrogenase [NAD(+)] [Mus musculus]	1	1	1	0	0	803078	0	0	0	1	0
10946934	THAP11	NOT_in_TF_list	THAP domain-containing protein 11 [Mus musculus]	2	2	2	0	0	0	1.0242e+06	0	0	0	2
110347473	APOA4	NOT_in_TF_list	apolipoprotein A-IV precursor [Mus musculus]	2	2	2	0	0	0	3.36441e+06	0	0	0	2
133506753	MPEG1	NOT_in_TF_list	macrophage-expressed gene 1 protein precursor [Mus musculus]	1	1	1	0	0	0	0	1	0	0	0
32189421	POLR1D	NOT_in_TF_list	DNA-directed RNA polymerases I and III subunit RPAC2 isoform 2 [Mus musculus]	1	1	1	0	0	0	4.05696e+06	0	0	0	1
274325486	LRCH4	NOT_in_TF_list	leucine-rich repeat and calponin homology domain-containing protein 4 isoform 2 [Mus musculus]	1	1	1	0	0	0	0	0	0	1	0
27369836	LARP4B	NOT_in_TF_list	la-related protein 4B [Mus musculus]	3	3	4	0	2.9757e+06	0	2.40538e+06	0	1	0	3
119372296	PCID2	NOT_in_TF_list	PCI domain-containing protein 2 [Mus musculus]	2	2	5	0	379806	0	2.0276e+06	0	1	0	4
226958537	TAF4B	NOT_in_TF_list	TAF4B RNA polymerase II, TATA box binding protein (TBP)-associated factor [Mus musculus]	1	2	3	0	5.92953e+06	0	5.72499e+06	1	1	0	1
51093840	EIF3L	NOT_in_TF_list	eukaryotic translation initiation factor 3 subunit L [Mus musculus]	3	3	3	0	0	901706	0	0	0	3	0
160358821	AMY1	NOT_in_TF_list	alpha-amylase 1 precursor [Mus musculus]	2	2	2	0	0	0	2.61216e+06	0	0	0	2
188035915	ALDH7A1	NOT_in_TF_list	alpha-aminoadipic semialdehyde dehydrogenase isoform b [Mus musculus]	2	2	2	0	2514206	0	0	0	2	0	0
329755243	MisMatch	NOT_in_TF_list	gelsolin isoform 2 [Mus musculus]	4	4	8	0	3.16407e+06	0	4.66123e+06	0	4	1	3
31542409	CML2	NOT_in_TF_list	probable N-acetyltransferase CML2 [Mus musculus]	2	2	2	0	0	6.02848e+06	0	0	0	2	0
46909607	OGT	NOT_in_TF_list	UDP-N-acetylglucosamine--peptide N-acetylglucosaminyltransferase 110 kDa subunit [Mus musculus]	5	5	6	0	5.63045e+06	0	5.44125e+06	0	1	0	5
13399310	RPS10	NOT_in_TF_list	40S ribosomal protein S10 [Mus musculus]	1	1	2	2.39074e+06	0	0	920908	1	0	0	1
283945600	WIBG	NOT_in_TF_list	partner of Y14 and mago isoform 2 [Mus musculus]	1	1	1	0	0	912992	0	0	0	1	0
124107612	PRDM13	NOT_in_TF_list	PR domain zinc finger protein 13 [Mus musculus]	1	1	1	579941	0	0	0	1	0	0	0
17298672	AFF4	NOT_in_TF_list	AF4/FMR2 family member 4 [Mus musculus]	5	5	6	0	0	0	2.70868e+06	0	0	0	6
58218988	ACSL5	NOT_in_TF_list	long-chain-fatty-acid--CoA ligase 5 [Mus musculus]	2	4	4	0	0	8.8866e+06	0	0	0	4	0
254675279	TJP1	NOT_in_TF_list	tight junction protein ZO-1 isoform 2 [Mus musculus]	8	8	9	0	0	0	1.83485e+07	0	0	0	9
70906449	BCLAF1	NOT_in_TF_list	bcl-2-associated transcription factor 1 isoform 3 [Mus musculus]	4	4	7	0	571856	0	7.01774e+06	0	1	0	6
28827824	TMEM111	NOT_in_TF_list	ER membrane protein complex subunit 3 [Mus musculus]	1	1	1	0	0	1.70662e+06	0	0	0	1	0
295317365	TAF6L	NOT_in_TF_list	TAF6-like RNA polymerase II p300/CBP-associated factor-associated factor 65 kDa subunit 6L isoform 2 [Mus musculus]	2	2	3	0	0	1.51493e+06	0	0	0	3	0
226443015	FAAH	NOT_in_TF_list	fatty-acid amide hydrolase 1 [Mus musculus]	1	1	1	0	0	0	0	1	0	0	0
164663904	SLAIN2	NOT_in_TF_list	SLAIN motif-containing protein 2 isoform b [Mus musculus]	2	2	3	0	1.65385e+06	532145	850761	0	1	1	1
13386354	RND3	NOT_in_TF_list	rho-related GTP-binding protein RhoE precursor [Mus musculus]	1	1	1	0	0	405917	0	0	0	1	0
31044423	ALKBH5	NOT_in_TF_list	RNA demethylase ALKBH5 [Mus musculus]	2	2	2	0	4.20961e+06	0	2.03369e+06	0	1	0	1
54261813	PARL	NOT_in_TF_list	presenilins-associated rhomboid-like protein, mitochondrial precursor [Mus musculus]	1	1	1	0	0	0	0	0	0	1	0
86198312	CYP4A12A	NOT_in_TF_list	cytochrome P450 4A12A [Mus musculus]	3	3	3	0	838073	0	599652	0	2	0	1
7710022	BCL11A	GeneID:53335	B-cell lymphoma/leukemia 11A isoform 1 [Mus musculus]	1	1	2	0	0	0	0	2	0	0	0
168229165	MICALL1	NOT_in_TF_list	MICAL-like protein 1 [Mus musculus]	1	1	1	0	0	0	0	0	0	0	1
13386064	YEATS4	GeneID:8089	YEATS domain-containing protein 4 [Mus musculus]	1	1	1	0	0	4.03846e+06	0	0	0	1	0
190194391	DNAJC21	NOT_in_TF_list	DnaJ (Hsp40) homolog, subfamily C, member 21 [Mus musculus]	2	2	2	0	0	2.40778e+06	0	0	0	2	0
7305261	MBD3	NOT_in_TF_list	methyl-CpG-binding domain protein 3 [Mus musculus]	1	1	2	0	0	1.59611e+06	2.10029e+06	0	0	1	1
171184435	PTPLAD1	NOT_in_TF_list	very-long-chain (3R)-3-hydroxyacyl-[acyl-carrier protein] dehydratase 3 [Mus musculus]	2	2	2	0	0	1.06508e+06	2.16148e+06	0	0	1	1
242246981	NSMCE4A	NOT_in_TF_list	non-SMC element 4 homolog A [Mus musculus]	2	2	2	0	2.94923e+06	0	3.76212e+06	0	1	0	1
224809373	KIF2A	NOT_in_TF_list	kinesin-like protein KIF2A isoform 2 [Mus musculus]	4	4	5	0	2.41414e+06	0	1.64729e+06	0	3	0	2
70778817	WDR61	NOT_in_TF_list	WD repeat-containing protein 61 isoform a [Mus musculus]	1	1	2	0	0	3.87111e+06	0	0	0	2	0
13385998	TRAP1	NOT_in_TF_list	heat shock protein 75 kDa, mitochondrial precursor [Mus musculus]	2	3	4	0	6.72292e+06	1.25629e+06	0	0	1	3	0
162287131	MTAP1S	NOT_in_TF_list	microtubule-associated protein 1S [Mus musculus]	4	4	5	0	0	0	1.11635e+06	0	0	0	5
165377206	SSR1	NOT_in_TF_list	translocon-associated protein subunit alpha precursor [Mus musculus]	1	1	1	0	0	0	981951	0	0	0	1
21703784	BAG2	NOT_in_TF_list	BAG family molecular chaperone regulator 2 [Mus musculus]	1	1	1	0	0	2.81871e+06	0	0	0	1	0
17921976	HAAO	NOT_in_TF_list	3-hydroxyanthranilate 3,4-dioxygenase [Mus musculus]	1	1	1	0	0	831981	0	0	0	1	0
171460960	ABHD14B	NOT_in_TF_list	alpha/beta hydrolase domain-containing protein 14B [Mus musculus]	1	1	1	0	0	992689	0	0	0	1	0
13385418	MRPL45	NOT_in_TF_list	39S ribosomal protein L45, mitochondrial [Mus musculus]	1	1	1	0	0	1.97499e+06	0	0	0	1	0
161016824	NFS1	NOT_in_TF_list	cysteine desulfurase, mitochondrial [Mus musculus]	2	2	2	0	0	0	893942	0	0	0	2
28076915	UBAP2	NOT_in_TF_list	ubiquitin-associated protein 2 [Mus musculus]	5	5	5	0	0	0	2.21098e+06	0	0	0	5
188497644	NOC3L	GeneID:64318	nucleolar complex protein 3 homolog [Mus musculus]	2	2	2	0	1.18804e+06	0	0	0	2	0	0
7657389	NOX4	NOT_in_TF_list	NADPH oxidase 4 [Mus musculus]	1	1	2	0	0	60179584	0	0	0	2	0
7305635	YME1L1	NOT_in_TF_list	ATP-dependent zinc metalloprotease YME1L1 [Mus musculus]	3	3	3	0	0	1.84587e+06	0	0	0	3	0
117647247	ZCCHC9	NOT_in_TF_list	zinc finger CCHC domain-containing protein 9 [Mus musculus]	1	1	1	0	0	1.53885e+06	0	0	0	1	0
309267203	LOC100505154	NOT_in_TF_list	PREDICTED: keratin, type II cytoskeletal 78-like, partial [Mus musculus]	2	4	50	8.06655e+08	7.98752e+08	5.94316e+08	2.32922e+09	11	11	9	19
163914388	DDX25	NOT_in_TF_list	ATP-dependent RNA helicase DDX25 [Mus musculus]	1	1	2	0	0	0	364859338	0	0	0	2
161086933	CREM	GeneID:1390	cAMP-responsive element modulator isoform 4 [Mus musculus]	1	2	2	0	0	0	3.371e+06	0	0	0	2
238814391	CCT7	NOT_in_TF_list	T-complex protein 1 subunit eta [Mus musculus]	3	3	5	0	1.85749e+06	1.20806e+07	2.08037e+06	0	2	2	1
254540223	MTTP	NOT_in_TF_list	microsomal triglyceride transfer protein large subunit isoform 2 precursor [Mus musculus]	4	4	4	0	941268	0	913794	0	2	0	2
13385534	UTP11L	NOT_in_TF_list	probable U3 small nucleolar RNA-associated protein 11 [Mus musculus]	1	1	1	503131	0	0	0	1	0	0	0
169658375	COL2A1	NOT_in_TF_list	collagen alpha-1(II) chain isoform 2 precursor [Mus musculus]	2	2	2	0	0	0	0	2	0	0	0
254911011	RRP1B	NOT_in_TF_list	ribosomal RNA processing protein 1 homolog B isoform 2 [Mus musculus]	2	2	2	0	0	0	2.72232e+06	0	0	0	2
161333845	XAF1	NOT_in_TF_list	XIAP-associated factor 1 [Mus musculus]	1	1	1	0	0	1.8462e+06	0	0	0	1	0
83921574	EXOC4	NOT_in_TF_list	exocyst complex component 4 [Mus musculus]	4	4	4	0	0	0	997455	0	1	0	3
13385374	RAB5A	NOT_in_TF_list	ras-related protein Rab-5A [Mus musculus]	1	1	1	0	0	5.34894e+06	0	0	0	1	0
31982520	ACADL	NOT_in_TF_list	long-chain specific acyl-CoA dehydrogenase, mitochondrial precursor [Mus musculus]	2	2	2	0	762739	0	2.90689e+06	0	1	0	1
405778333	MisMatch	NOT_in_TF_list	cystathionine beta-synthase isoform 2 [Mus musculus]	1	1	1	0	1.64715e+06	0	0	0	1	0	0
165932389	NUP155	NOT_in_TF_list	nuclear pore complex protein Nup155 [Mus musculus]	6	6	7	0	0	0	3.19165e+06	1	0	0	6
254692909	TTF2	NOT_in_TF_list	transcription termination factor 2 [Mus musculus]	5	5	7	0	1.38193e+06	0	700408	0	3	0	4
13507646	HSPB8	NOT_in_TF_list	heat shock protein beta-8 [Mus musculus]	1	1	2	0	0	4.49556e+06	0	0	0	2	0
57222290	ZFP36L3	NOT_in_TF_list	zinc finger protein 36-like 3 [Mus musculus]	1	1	1	0	0	0	0	1	0	0	0
158635979	ATP2A2	NOT_in_TF_list	sarcoplasmic/endoplasmic reticulum calcium ATPase 2 isoform a [Mus musculus]	4	4	4	0	2.71484e+06	0	4.12496e+06	0	1	0	3
31981562	PKM2	NOT_in_TF_list	pyruvate kinase, muscle isoform M2 [Mus musculus]	2	2	2	0	0	2.1672e+06	1.00827e+06	0	0	1	1
94536725	LARP1B	NOT_in_TF_list	La ribonucleoprotein domain family, member 1B [Mus musculus]	1	1	1	0	0	377591	0	0	0	1	0
159032056	LSM4	NOT_in_TF_list	U6 snRNA-associated Sm-like protein LSm4 [Mus musculus]	1	1	1	0	0	0	5.13543e+06	0	0	0	1
148277061	CSTF2T	NOT_in_TF_list	cleavage stimulation factor subunit 2 tau variant [Mus musculus]	1	3	3	746673	0	0	0	1	0	2	0
117676367	RRP1	NOT_in_TF_list	ribosomal RNA processing protein 1 homolog A [Mus musculus]	1	1	1	0	0	0	0	0	0	1	0
124486951	PBRM1	NOT_in_TF_list	protein polybromo-1 [Mus musculus]	7	7	10	0	8.8271e+06	6.43155e+06	6.87468e+06	0	2	1	7
27369569	SMNDC1	NOT_in_TF_list	survival of motor neuron-related-splicing factor 30 [Mus musculus]	1	1	1	0	0	8.40977e+06	0	0	0	1	0
195976788	RTF1	NOT_in_TF_list	RNA polymerase-associated protein RTF1 homolog precursor [Mus musculus]	1	1	1	0	0	0	0	1	0	0	0
210031293	CHDH	NOT_in_TF_list	choline dehydrogenase, mitochondrial [Mus musculus]	3	3	3	0	0	5.0228e+06	0	0	0	3	0
167234411	NUBPL	NOT_in_TF_list	iron-sulfur protein NUBPL precursor [Mus musculus]	1	1	1	0	0	1.39884e+06	0	0	0	1	0
120407054	FBXW8	NOT_in_TF_list	F-box/WD repeat-containing protein 8 [Mus musculus]	2	2	2	0	0	163907	0	0	0	1	1
284507286	BAG1	NOT_in_TF_list	BAG family molecular chaperone regulator 1 isoform 1S [Mus musculus]	1	1	1	0	429117	0	0	0	1	0	0
9506981	EXOSC9	NOT_in_TF_list	exosome complex component RRP45 [Mus musculus]	2	2	3	0	5.93849e+06	7.31409e+06	0	0	1	2	0
124487221	SAMD1	NOT_in_TF_list	atherin [Mus musculus]	2	2	2	0	0	1.5243e+06	0	0	0	2	0
82922210	LOC636306	NOT_in_TF_list	PREDICTED: ribosome biogenesis protein NSA2 homolog isoform 1 [Mus musculus]	1	1	1	1.02544e+06	0	0	0	1	0	0	0
160333237	GPRC5C	NOT_in_TF_list	G-protein coupled receptor family C group 5 member C isoform b precursor [Mus musculus]	2	2	2	0	1.8856e+06	0	2.21977e+06	0	1	0	1
89111939	EXOC1	NOT_in_TF_list	exocyst complex component 1 [Mus musculus]	4	4	4	0	919009	1.31283e+06	0	0	2	1	1
31542397	CHRNB2	NOT_in_TF_list	neuronal acetylcholine receptor subunit beta-2 precursor [Mus musculus]	1	1	2	0	0	4.45951e+06	0	0	0	2	0
123173870	HSD17B2	NOT_in_TF_list	estradiol 17-beta-dehydrogenase 2 [Mus musculus]	2	2	4	0	0	815328	2.92905e+06	0	0	1	3
118582271	SRSF1	NOT_in_TF_list	serine/arginine-rich splicing factor 1 isoform 2 [Mus musculus]	1	1	2	0	0	0	7.43733e+06	0	0	0	2
31980657	PRPF3	NOT_in_TF_list	U4/U6 small nuclear ribonucleoprotein Prp3 [Mus musculus]	3	3	4	0	3.11173e+06	0	3.63784e+06	0	3	0	1
15277331	FKBP11	NOT_in_TF_list	peptidyl-prolyl cis-trans isomerase FKBP11 precursor [Mus musculus]	1	1	1	0	0	632835	0	0	0	1	0
115270963	GSDMA2	NOT_in_TF_list	gasdermin-A2 [Mus musculus]	3	3	6	0	1.0993e+06	2.70032e+06	2.78453e+06	0	1	2	3
407263312	MisMatch	NOT_in_TF_list	PREDICTED: uncharacterized protein LOC666688 [Mus musculus]	1	1	1	0	1.70936e+06	0	0	0	1	0	0
6755995	WDR1	NOT_in_TF_list	WD repeat-containing protein 1 [Mus musculus]	2	2	2	0	0	3.24555e+06	0	0	0	2	0
13385016	SRSF9	NOT_in_TF_list	serine/arginine-rich splicing factor 9 [Mus musculus]	1	1	1	0	0	8.43822e+06	0	0	0	1	0
254675249	SMAD3	GeneID:4088	mothers against decapentaplegic homolog 3 [Mus musculus]	2	2	2	0	3.81484e+06	0	675936	0	1	0	1
31982543	4833413D08RIK	NOT_in_TF_list	vomeromodulin precursor [Mus musculus]	1	1	1	0	0	0	0	1	0	0	0
356582492	MisMatch	NOT_in_TF_list	2-oxoglutarate dehydrogenase, mitochondrial isoform 4 [Mus musculus]	4	4	4	0	0	0	2.19222e+06	0	0	0	4
241666485	PEX11B	NOT_in_TF_list	peroxisomal membrane protein 11B isoform 2 [Mus musculus]	1	1	1	0	0	1.4814e+06	0	0	0	1	0
165932333	GLO1	NOT_in_TF_list	lactoylglutathione lyase [Mus musculus]	1	1	1	0	0	800305	0	0	0	1	0
12963705	ELF2	GeneID:1998	ETS-related transcription factor Elf-2 [Mus musculus]	2	2	2	0	0	2.40231e+06	0	0	0	2	0
219842353	EIF2C2	NOT_in_TF_list	protein argonaute-2 [Mus musculus]	4	4	5	0	1.14431e+06	0	1.32027e+06	0	2	0	3
6680848	MisMatch	NOT_in_TF_list	caspase-2 [Mus musculus]	1	1	1	0	1.10797e+07	0	0	0	1	0	0
268607562	CYP2C50	NOT_in_TF_list	cytochrome P450 2C50 isoform 2 precursor [Mus musculus]	1	2	4	0	2.31014e+06	0	1.86036e+06	0	1	0	3
71043961	2210010C04RIK	NOT_in_TF_list	trypsinogen 7 precursor [Mus musculus]	1	1	11	1.34363e+09	2118016878	1.78669e+09	5.89926e+09	3	2	2	4
87252711	ADIPOQ	NOT_in_TF_list	adiponectin precursor [Mus musculus]	1	1	1	0	0	1.83181e+06	0	0	0	1	0
116326001	COL24A1	NOT_in_TF_list	collagen alpha-1(XXIV) chain precursor [Mus musculus]	2	2	2	0	0	0	0	1	0	1	0
239787090	ACOX2	NOT_in_TF_list	peroxisomal acyl-coenzyme A oxidase 2 [Mus musculus]	3	3	3	0	0	1.65393e+06	0	0	0	3	0
240120140	HSD3B3	NOT_in_TF_list	3 beta-hydroxysteroid dehydrogenase/Delta 5--_4-isomerase type 3 isoform 1 [Mus musculus]	1	2	4	0	1.48077e+07	0	3.40498e+07	0	2	0	2
13385626	MED4	NOT_in_TF_list	mediator of RNA polymerase II transcription subunit 4 [Mus musculus]	1	1	1	0	0	0	1.86687e+06	0	0	0	1
160708005	FGD6	NOT_in_TF_list	FYVE, RhoGEF and PH domain-containing protein 6 [Mus musculus]	5	5	5	0	0	0	2.55828e+06	0	0	0	5
176866126	COL4A6	NOT_in_TF_list	collagen, type IV, alpha 6 precursor [Mus musculus]	3	3	3	0	0	0	0	2	1	0	0
21704140	HIBADH	NOT_in_TF_list	3-hydroxyisobutyrate dehydrogenase, mitochondrial precursor [Mus musculus]	1	1	1	0	0	1.83599e+06	0	0	0	1	0
56790900	ADAM22	NOT_in_TF_list	disintegrin and metalloproteinase domain-containing protein 22 isoform b precursor [Mus musculus]	1	1	1	0	0	0	0	0	0	1	0
114520592	MTAP6	NOT_in_TF_list	microtubule-associated protein 6 isoform 2 [Mus musculus]	1	1	1	0	0	0	0	1	0	0	0
125628629	EIF3D	NOT_in_TF_list	eukaryotic translation initiation factor 3 subunit D [Mus musculus]	2	2	2	0	0	999589	0	0	0	2	0
6678878	MGMT	NOT_in_TF_list	methylated-DNA--protein-cysteine methyltransferase [Mus musculus]	1	1	1	0	0	2.67519e+06	0	0	0	1	0
6678788	MAN1A	NOT_in_TF_list	mannosyl-oligosaccharide 1,2-alpha-mannosidase IA [Mus musculus]	1	1	1	0	0	0	0	1	0	0	0
225637531	EIF3F	NOT_in_TF_list	eukaryotic translation initiation factor 3 subunit F [Mus musculus]	1	1	1	0	1.09227e+06	0	0	0	1	0	0
261862287	4931428F04RIK	NOT_in_TF_list	uncharacterized protein KIAA0895-like [Mus musculus]	1	1	1	0	4.72511e+06	0	0	0	1	0	0
229093990	RNF40	NOT_in_TF_list	E3 ubiquitin-protein ligase BRE1B [Mus musculus]	3	4	5	0	2.03043e+06	0	1.59607e+06	0	3	0	2
54291704	PACS1	NOT_in_TF_list	phosphofurin acidic cluster sorting protein 1 [Mus musculus]	1	1	1	0	0	0	0	1	0	0	0
19526798	CYP2A12	NOT_in_TF_list	cytochrome P450 2A12 precursor [Mus musculus]	2	2	3	0	407635	0	1.80767e+06	0	1	0	2
6755847	TOM1	NOT_in_TF_list	target of Myb protein 1 isoform 1 [Mus musculus]	2	2	2	0	768044	0	0	0	2	0	0
225543490	SHE	NOT_in_TF_list	SH2 domain-containing adapter protein E [Mus musculus]	1	1	2	0	4461505	0	0	0	2	0	0
48526512	MRPS15	NOT_in_TF_list	28S ribosomal protein S15, mitochondrial precursor [Mus musculus]	1	1	1	0	0	2.79513e+06	0	0	0	1	0
270483872	CDADC1	NOT_in_TF_list	cytidine and dCMP deaminase domain-containing protein 1 isoform 5 [Mus musculus]	2	2	4	0	706888	2.13188e+06	0	0	1	3	0
134053862	MAGIX	NOT_in_TF_list	PDZ domain-containing protein MAGIX [Mus musculus]	1	1	1	0	0	0	0	0	0	0	1
54607128	PDCD11	NOT_in_TF_list	protein RRP5 homolog [Mus musculus]	7	7	8	0	0	0	4.04734e+06	0	0	0	8
21312970	MTPAP	NOT_in_TF_list	poly(A) RNA polymerase, mitochondrial precursor [Mus musculus]	2	2	2	0	0	1.17472e+06	0	0	0	2	0
10181210	42801	NOT_in_TF_list	E3 ubiquitin-protein ligase MARCH7 [Mus musculus]	1	1	1	0	0	0	0	0	0	0	1
27754027	MED6	NOT_in_TF_list	mediator of RNA polymerase II transcription subunit 6 [Mus musculus]	1	1	1	0	0	2.46494e+06	0	0	0	1	0
260763917	ARFGAP2	NOT_in_TF_list	ADP-ribosylation factor GTPase-activating protein 2 isoform 2 [Mus musculus]	2	2	2	0	0	1.52081e+06	0	0	0	2	0
157909789	JHDM1D	NOT_in_TF_list	lysine-specific demethylase 7 [Mus musculus]	1	1	1	0	0	0	0	0	0	1	0
169646352	2610027L16RIK	NOT_in_TF_list	nucleolar protein 9 [Mus musculus]	2	2	2	0	0	674393	0	0	0	2	0
118130868	MLLT6	NOT_in_TF_list	myeloid/lymphoid or mixed lineage-leukemia translocation to 6 homolog [Mus musculus]	3	3	4	0	0	0	0	2	0	2	0
9790161	PKP1	NOT_in_TF_list	plakophilin-1 [Mus musculus]	3	3	7	1.64202e+06	865717	1.34974e+06	4.23638e+06	3	1	1	2
58037265	CHIT1	NOT_in_TF_list	chitotriosidase-1 precursor [Mus musculus]	1	1	1	0	2.86747e+06	0	0	0	1	0	0
261823966	ZFML	NOT_in_TF_list	zinc finger protein 638 isoform 1 [Mus musculus]	7	7	7	0	0	0	3.54308e+06	0	0	0	7
27734096	FAM155A	NOT_in_TF_list	transmembrane protein FAM155A [Mus musculus]	1	1	1	0	0	0	0	1	0	0	0
326381098	SARS	NOT_in_TF_list	serine--tRNA ligase, cytoplasmic isoform 2 [Mus musculus]	2	2	2	0	0	4.17002e+06	0	0	0	2	0
122425580	KRT24	NOT_in_TF_list	keratin, type I cytoskeletal 24 [Mus musculus]	1	2	18	9.10765e+08	2.2804e+09	1.04961e+09	3.32595e+09	5	3	3	7
6754402	JUN	GeneID:3725	transcription factor AP-1 [Mus musculus]	1	1	1	0	0	0	0	0	1	0	0
118442832	ZBTB33	NOT_in_TF_list	transcriptional regulator Kaiso [Mus musculus]	1	1	1	0	0	0	978918	0	0	0	1
407262078	MisMatch	NOT_in_TF_list	PREDICTED: uncharacterized LOC101055955 [Mus musculus]	1	1	1	0	0	0	0	1	0	0	0
166295220	NUP43	NOT_in_TF_list	nucleoporin Nup43 [Mus musculus]	1	1	1	0	1.52346e+08	0	0	0	1	0	0
226423931	COL17A1	NOT_in_TF_list	collagen alpha-1(XVII) chain [Mus musculus]	2	2	2	0	0	0	0	1	0	1	0
227430356	NOL9	NOT_in_TF_list	polynucleotide 5'-hydroxyl-kinase NOL9 isoform 2 [Mus musculus]	3	3	3	0	0	1.13332e+06	0	0	0	3	0
159110562	ICAM5	NOT_in_TF_list	intercellular adhesion molecule 5 precursor [Mus musculus]	1	1	1	0	0	0	0	1	0	0	0
84000017	GRK6	NOT_in_TF_list	G protein-coupled receptor kinase 6 isoform b [Mus musculus]	2	2	2	0	0	1.59389e+06	0	0	0	2	0
13385084	NIPSNAP3B	NOT_in_TF_list	protein NipSnap homolog 3B [Mus musculus]	1	1	1	0	0	436721	0	0	0	1	0
110625985	CEACAM5	NOT_in_TF_list	carcinoembryonic antigen-related cell adhesion molecule 5 precursor [Mus musculus]	1	1	1	0	0	0	0	0	0	1	0
58037133	NGDN	NOT_in_TF_list	neuroguidin [Mus musculus]	1	1	1	0	0	0	324552	0	0	0	1
18700024	MisMatch	NOT_in_TF_list	isocitrate dehydrogenase 3, beta subunit [Mus musculus]	2	2	2	0	1.98076e+06	0	2.01276e+06	0	1	0	1
229577266	KCTD18	NOT_in_TF_list	potassium channel tetramerization domain containing 18 isoform 1 [Mus musculus]	1	1	2	0	1.38561e+06	0	4.0955e+06	0	1	0	1
110625798	NOS1AP	NOT_in_TF_list	carboxyl-terminal PDZ ligand of neuronal nitric oxide synthase protein isoform 2 [Mus musculus]	1	1	2	0	2.10216e+06	0	468065	0	1	0	1
255683435	SKOR1	GeneID:390598	SKI family transcriptional corepressor 1 isoform 4 [Mus musculus]	1	1	1	0	0	0	0	1	0	0	0
124249335	TEX10	NOT_in_TF_list	testis-expressed sequence 10 protein [Mus musculus]	3	3	5	0	3.1378e+06	0	3.43017e+06	0	2	0	3
6754396	ZFP346	NOT_in_TF_list	zinc finger protein 346 [Mus musculus]	1	1	1	0	0	0	694988	0	0	0	1
311893382	DYNC1I2	NOT_in_TF_list	cytoplasmic dynein 1 intermediate chain 2 isoform 5 [Mus musculus]	1	1	1	0	0	1.45315e+06	0	0	0	1	0
491222947	MisMatch	NOT_in_TF_list	phenylalanine--tRNA ligase beta subunit [Mus musculus]	3	3	3	0	0	1.24239e+06	0	0	0	3	0
34538601	COX2	NOT_in_TF_list	cytochrome c oxidase subunit II [Mus musculus]	1	1	1	0	0	3.11912e+06	0	0	0	1	0
6679445	PPOX	NOT_in_TF_list	protoporphyrinogen oxidase [Mus musculus]	1	2	2	0	0	0	1.71767e+06	0	0	0	2
12963497	KNG1	NOT_in_TF_list	kininogen-1 isoform 2 precursor [Mus musculus]	2	2	2	0	0	4.4239e+06	0	0	0	2	0
226958438	QK	NOT_in_TF_list	protein quaking isoform 2 [Mus musculus]	1	1	1	0	0	0	1.95887e+06	0	0	0	1
58037255	BROX	NOT_in_TF_list	BRO1 domain-containing protein BROX [Mus musculus]	1	1	2	0	0	0	922506	0	0	0	2
24415998	SMC6	NOT_in_TF_list	structural maintenance of chromosomes protein 6 [Mus musculus]	4	4	4	0	4.5957e+06	0	0	0	4	0	0
244790003	MPST	NOT_in_TF_list	3-mercaptopyruvate sulfurtransferase [Mus musculus]	1	1	1	0	0	1.87004e+06	0	0	0	1	0
113205069	CLPX	NOT_in_TF_list	ATP-dependent Clp protease ATP-binding subunit clpX-like, mitochondrial isoform 2 [Mus musculus]	2	2	2	0	0	1.66291e+06	0	0	0	2	0
84875532	MRPL1	NOT_in_TF_list	39S ribosomal protein L1, mitochondrial isoform 2 [Mus musculus]	1	1	1	0	0	0	1.46342e+06	0	0	0	1
31543330	NNT	NOT_in_TF_list	NAD(P) transhydrogenase, mitochondrial precursor [Mus musculus]	1	1	3	0	0	0	0	3	0	0	0
109948300	TRIM71	NOT_in_TF_list	E3 ubiquitin-protein ligase TRIM71 [Mus musculus]	1	1	1	0	0	0	0	1	0	0	0
88014564	MAD1L1	NOT_in_TF_list	mitotic spindle assembly checkpoint protein MAD1 [Mus musculus]	3	3	3	0	0	1.08939e+06	0	0	0	3	0
27369992	COQ3	NOT_in_TF_list	hexaprenyldihydroxybenzoate methyltransferase, mitochondrial [Mus musculus]	1	1	1	0	0	0	369280	0	0	0	1
6754642	MASP2	NOT_in_TF_list	mannan-binding lectin serine protease 2 isoform 2 precursor [Mus musculus]	1	1	1	960064	0	0	0	1	0	0	0
39930413	NUP98	NOT_in_TF_list	nuclear pore complex protein Nup98-Nup96 [Mus musculus]	4	4	6	0	2.13023e+06	687524	2.46582e+06	0	3	1	2
161016843	DSG2	NOT_in_TF_list	desmoglein-2 precursor [Mus musculus]	3	3	5	0	1.36473e+06	0	2.17446e+06	0	2	0	3
13937355	ESD	NOT_in_TF_list	S-formylglutathione hydrolase [Mus musculus]	1	1	1	0	0	2.00273e+06	0	0	0	1	0
156713423	PSMD8	NOT_in_TF_list	26S proteasome non-ATPase regulatory subunit 8 [Mus musculus]	1	1	1	0	0	358798	0	0	0	1	0
406855425	MisMatch	NOT_in_TF_list	NADH dehydrogenase [ubiquinone] iron-sulfur protein 8, mitochondrial [Mus musculus]	1	1	1	0	0	616769	0	0	0	1	0
84872207	RBMS2	NOT_in_TF_list	RNA-binding motif, single-stranded-interacting protein 2 isoform b [Mus musculus]	1	1	1	1.0898e+06	0	0	0	1	0	0	0
158937260	YIF1B	NOT_in_TF_list	protein YIF1B isoform 2 [Mus musculus]	1	1	1	0	0	586140	0	0	0	1	0
18129616	PINX1	NOT_in_TF_list	PIN2/TERF1-interacting telomerase inhibitor 1 [Mus musculus]	1	1	1	0	403635	0	0	0	1	0	0
356995947	MisMatch	NOT_in_TF_list	peptidyl-prolyl cis-trans isomerase-like 2 [Mus musculus]	2	2	2	0	0	1.1744e+06	0	0	0	2	0
190877473	SLC11A1	NOT_in_TF_list	natural resistance-associated macrophage protein 1 [Mus musculus]	1	1	1	0	0	0	1.54081e+06	0	0	0	1
37537520	MRTO4	NOT_in_TF_list	mRNA turnover protein 4 homolog [Mus musculus]	1	1	1	0	0	2.46023e+06	0	0	0	1	0
114158701	NOP14	NOT_in_TF_list	nucleolar protein 14 [Mus musculus]	3	3	3	0	0	0	745601	0	0	0	3
13385274	PLBD1	NOT_in_TF_list	phospholipase B-like 1 precursor [Mus musculus]	2	2	3	0	2.50821e+06	0	2.66078e+06	0	1	0	2
13385584	PBLD2	NOT_in_TF_list	phenazine biosynthesis-like domain-containing protein 2 [Mus musculus]	1	1	1	0	0	1.43179e+06	0	0	0	1	0
31543224	SMAD4	GeneID:4089	mothers against decapentaplegic homolog 4 [Mus musculus]	1	1	1	0	0	598549	0	0	0	1	0
122939196	CLTA	NOT_in_TF_list	clathrin light chain A isoform d [Mus musculus]	1	1	1	0	0	0	2.40986e+06	0	0	0	1
21313560	DIMT1	NOT_in_TF_list	probable dimethyladenosine transferase [Mus musculus]	1	1	1	0	0	639000	0	0	0	1	0
33563260	AGFG1	NOT_in_TF_list	arf-GAP domain and FG repeat-containing protein 1 [Mus musculus]	1	1	1	0	0	670966	0	0	0	1	0
225543319	VCP	NOT_in_TF_list	transitional endoplasmic reticulum ATPase [Mus musculus]	2	3	3	0	713362	0	0	0	3	0	0
160333312	SIK3	NOT_in_TF_list	serine/threonine-protein kinase SIK3 [Mus musculus]	1	1	2	0	0	0	0	0	0	0	2
6755034	PEX11A	NOT_in_TF_list	peroxisomal membrane protein 11A [Mus musculus]	1	1	1	0	0	4.16666e+06	0	0	0	1	0
61657921	KIF5B	NOT_in_TF_list	kinesin-1 heavy chain [Mus musculus]	3	3	3	0	965444	0	399568	0	2	0	1
21312151	CHMP2A	NOT_in_TF_list	charged multivesicular body protein 2a [Mus musculus]	1	1	1	0	0	1.01369e+06	0	0	0	1	0
22507333	RBM5	NOT_in_TF_list	RNA-binding protein 5 [Mus musculus]	3	3	4	0	1.51812e+06	0	1.54036e+06	0	2	0	2
160298217	GSTA4	NOT_in_TF_list	glutathione S-transferase A4 [Mus musculus]	1	1	1	0	0	4.59592e+06	0	0	0	1	0
13386092	DENR	NOT_in_TF_list	density-regulated protein [Mus musculus]	1	1	1	0	0	1.1216e+06	0	0	0	1	0
255683297	ELMO3	NOT_in_TF_list	engulfment and cell motility protein 3 [Mus musculus]	2	2	3	0	0	647253	0	0	0	3	0
225543530	C2CD2	NOT_in_TF_list	C2 calcium-dependent domain containing 2 [Mus musculus]	3	3	3	0	0	0	2.07136e+06	0	0	0	3
11612511	MLLT1	NOT_in_TF_list	protein ENL [Mus musculus]	2	2	2	0	0	7.05033e+06	0	0	0	2	0
10946950	RCL1	NOT_in_TF_list	RNA 3'-terminal phosphate cyclase-like protein [Mus musculus]	1	1	1	0	0	0	790467	0	0	0	1
10946722	RQCD1	NOT_in_TF_list	cell differentiation protein RCD1 homolog [Mus musculus]	1	1	1	0	0	664886	0	0	0	1	0
239051572	MPP7	NOT_in_TF_list	MAGUK p55 subfamily member 7 isoform 1 [Mus musculus]	2	2	2	0	0	1.98837e+06	0	0	0	2	0
114155153	MAZ	GeneID:4150	myc-associated zinc finger protein [Mus musculus]	2	2	2	0	0	0	1.19168e+06	0	0	0	2
226437589	TNS1	NOT_in_TF_list	tensin 1 [Mus musculus]	5	5	5	0	120263254	0	2.21349e+06	0	1	0	4
29789263	TRIM23	NOT_in_TF_list	E3 ubiquitin-protein ligase TRIM23 [Mus musculus]	1	1	1	0	508572	0	0	0	1	0	0
21312564	CNN3	NOT_in_TF_list	calponin-3 [Mus musculus]	1	1	1	0	0	0	1.65602e+06	0	0	0	1
66792806	AFG3L1	NOT_in_TF_list	AFG3-like protein 1 [Mus musculus]	2	3	4	0	1.51377e+06	478184	0	0	2	2	0
167234372	EIF4B	NOT_in_TF_list	eukaryotic translation initiation factor 4B [Mus musculus]	2	2	3	0	0	3.40576e+06	0	0	0	3	0
257467556	RRP7A	NOT_in_TF_list	ribosomal RNA-processing protein 7 homolog A [Mus musculus]	1	1	1	0	0	0	1.13349e+06	0	0	0	1
110225364	ZFHX3	GeneID:463	zinc finger homeobox protein 3 [Mus musculus]	8	13	18	0	2.5665e+06	471557	1.06109e+07	0	3	1	14
13384660	MRPL2	NOT_in_TF_list	39S ribosomal protein L2, mitochondrial precursor [Mus musculus]	1	1	1	0	0	2685484	0	0	0	1	0
162329549	SCO2	NOT_in_TF_list	protein SCO2 homolog, mitochondrial [Mus musculus]	1	1	1	0	0	720563	0	0	0	1	0
157817372	MBD1	NOT_in_TF_list	methyl-CpG-binding domain protein 1 [Mus musculus]	2	2	2	0	0	494444	0	0	0	2	0
66392581	COG8	NOT_in_TF_list	conserved oligomeric Golgi complex subunit 8 [Mus musculus]	1	1	1	0	0	0	0	1	0	0	0
210147530	ZSWIM6	NOT_in_TF_list	zinc finger SWIM domain-containing protein 6 [Mus musculus]	1	1	1	0	0	0	0	1	0	0	0
31981784	9030617O03RIK	NOT_in_TF_list	UPF0317 protein C14orf159 homolog, mitochondrial precursor [Mus musculus]	1	1	2	0	0	0	661376	0	0	0	2
6755863	HSP90B1	NOT_in_TF_list	endoplasmin precursor [Mus musculus]	1	3	4	0	1.99674e+06	0	3.84672e+06	0	2	0	2
13385660	XAB2	NOT_in_TF_list	pre-mRNA-splicing factor SYF1 [Mus musculus]	3	3	3	0	2.17791e+06	0	0	0	3	0	0
224809563	NUCKS1	NOT_in_TF_list	nuclear ubiquitous casein and cyclin-dependent kinase substrate 1 isoform 2 [Mus musculus]	1	1	1	0	1.1782e+06	0	0	0	1	0	0
161086990	PROSAPIP1	NOT_in_TF_list	proSAP-interacting protein 1 [Mus musculus]	1	1	2	0	0	2.43083e+06	0	0	0	2	0
62234443	INO80	NOT_in_TF_list	DNA helicase INO80 [Mus musculus]	5	5	5	0	0	0	3.76252e+06	0	0	0	5
172072677	UROC1	NOT_in_TF_list	urocanate hydratase [Mus musculus]	2	2	2	0	0	757861	0	0	0	2	0
6680836	CALR	NOT_in_TF_list	calreticulin precursor [Mus musculus]	2	2	2	0	0	1.53822e+07	0	0	0	2	0
154090953	CTR9	NOT_in_TF_list	RNA polymerase-associated protein CTR9 homolog [Mus musculus]	3	3	3	0	0	0	929576	0	0	0	3
21312518	TRMU	NOT_in_TF_list	mitochondrial tRNA-specific 2-thiouridylase 1 [Mus musculus]	1	1	2	0	457603	0	293906	0	1	0	1
31543476	PHF2	NOT_in_TF_list	lysine-specific demethylase PHF2 [Mus musculus]	4	4	5	0	0	1.56411e+06	1.17533e+07	0	0	1	4
166295210	DAB2IP	NOT_in_TF_list	disabled homolog 2-interacting protein isoform 3 [Mus musculus]	4	4	4	0	2.56241e+06	0	0	0	4	0	0
6755851	TOP3B	NOT_in_TF_list	DNA topoisomerase 3-beta-1 [Mus musculus]	3	3	4	0	1.13666e+06	0	504039	0	2	0	2
6753332	CD14	NOT_in_TF_list	monocyte differentiation antigen CD14 precursor [Mus musculus]	1	1	1	0	949978	0	0	0	1	0	0
21450085	LIMS2	NOT_in_TF_list	LIM and senescent cell antigen-like-containing domain protein 2 [Mus musculus]	2	2	2	0	0	0	1.01809e+07	0	0	0	2
172072643	RECK	NOT_in_TF_list	reversion-inducing cysteine-rich protein with Kazal motifs precursor [Mus musculus]	1	1	1	0	0	0	0	0	0	1	0
156255161	ACBD5	NOT_in_TF_list	acyl-CoA-binding domain-containing protein 5 isoform d [Mus musculus]	1	1	1	0	0	580853	0	0	0	1	0
21704144	MAT2A	NOT_in_TF_list	S-adenosylmethionine synthase isoform type-2 [Mus musculus]	1	1	1	0	1.78862e+06	0	0	0	1	0	0
229577222	EIF2D	NOT_in_TF_list	eukaryotic translation initiation factor 2D isoform 2 [Mus musculus]	1	1	1	0	0	1.74828e+06	0	0	0	1	0
6753418	CHRD	NOT_in_TF_list	chordin isofrom 1 precursor [Mus musculus]	1	1	1	0	0	0	0	1	0	0	0
253683481	HMG20B	GeneID:10362	SWI/SNF-related matrix-associated actin-dependent regulator of chromatin subfamily E member 1-related [Mus musculus]	1	1	1	0	0	0	2.20054e+06	0	0	0	1
226529982	MORC2A	NOT_in_TF_list	MORC family CW-type zinc finger protein 2A isoform 1 [Mus musculus]	4	4	6	0	5.33753e+06	0	3.12592e+06	0	3	0	3
158508501	42983	NOT_in_TF_list	septin-5 [Mus musculus]	1	1	1	0	0	0	1.37488e+06	0	0	0	1
13184050	AADAC	NOT_in_TF_list	arylacetamide deacetylase precursor [Mus musculus]	1	1	1	0	2.79554e+06	0	0	0	1	0	0
13385976	MRPL19	NOT_in_TF_list	39S ribosomal protein L19, mitochondrial [Mus musculus]	1	1	2	0	0	2.80597e+06	0	1	0	1	0
126012517	AIMP1	NOT_in_TF_list	aminoacyl tRNA synthase complex-interacting multifunctional protein 1 [Mus musculus]	1	1	1	0	0	0	3.981e+06	0	0	0	1
112734861	IPO9	NOT_in_TF_list	importin-9 [Mus musculus]	1	1	3	0	0	0	0	3	0	0	0
254911104	FBXO6	NOT_in_TF_list	F-box only protein 6 [Mus musculus]	1	1	1	0	0	3.76355e+06	0	0	0	1	0
57164407	TANC1	NOT_in_TF_list	protein TANC1 [Mus musculus]	5	5	5	0	0	0	1.57677e+06	0	0	0	5
21311839	TOE1	NOT_in_TF_list	target of EGR1 protein 1 [Mus musculus]	2	2	2	0	0	1.25006e+06	0	0	0	2	0
158186674	SRRT	NOT_in_TF_list	serrate RNA effector molecule homolog isoform 3 [Mus musculus]	3	3	3	0	1.29824e+06	0	3.00913e+06	0	1	0	2
254540183	MOV10	NOT_in_TF_list	putative helicase MOV-10 isoform b [Mus musculus]	3	3	4	0	626293	0	201050	0	2	0	2
21314862	OTOA	NOT_in_TF_list	otoancorin precursor [Mus musculus]	1	2	4	35553127	0	0	0	1	0	0	3
133778915	HMGN5	GeneID:79366	high mobility group nucleosome-binding domain-containing protein 5 [Mus musculus]	1	1	1	0	0	2.69634e+06	0	0	0	1	0
9055370	EIF3I	NOT_in_TF_list	eukaryotic translation initiation factor 3 subunit I [Mus musculus]	1	1	1	0	0	0	0	0	0	0	1
21313438	EXOC2	NOT_in_TF_list	exocyst complex component 2 [Mus musculus]	2	2	2	0	0	0	2.79348e+06	0	1	0	1
183396792	CDYL	NOT_in_TF_list	chromodomain Y-like protein isoform 2 [Mus musculus]	2	2	2	0	0	1.88779e+06	0	0	0	2	0
21703806	TMPRSS4	NOT_in_TF_list	transmembrane protease serine 4 [Mus musculus]	1	1	1	0	0	0	4527975	0	0	0	1
227496421	TASP1	NOT_in_TF_list	threonine aspartase 1 isoform b [Mus musculus]	1	1	1	0	0	1.66921e+06	0	0	0	1	0
165377226	SLC2A1	NOT_in_TF_list	solute carrier family 2, facilitated glucose transporter member 1 [Mus musculus]	2	2	4	0	1.38914e+06	931579	2.13809e+06	0	1	2	1
268832229	FAM59B	NOT_in_TF_list	GRB2-associated and regulator of MAPK protein-like [Mus musculus]	1	1	1	0	0	0	0	1	0	0	0
30424663	A230051G13RIK	NOT_in_TF_list	putative transferase CAF17 homolog, mitochondrial isoform 1 precursor [Mus musculus]	1	1	1	0	0	0	0	0	0	0	1
22122795	DYNC1LI1	NOT_in_TF_list	cytoplasmic dynein 1 light intermediate chain 1 [Mus musculus]	2	2	2	0	0	0	2.70857e+06	0	0	0	2
58331138	IRS4	NOT_in_TF_list	insulin receptor substrate 4 [Mus musculus]	1	1	1	0	0	0	0	1	0	0	0
23943795	NCKAP1L	NOT_in_TF_list	nck-associated protein 1-like [Mus musculus]	1	2	2	0	2.83998e+07	0	0	0	2	0	0
29243938	BTLA	NOT_in_TF_list	B- and T-lymphocyte attenuator isoform 2 precursor [Mus musculus]	1	1	1	0	0	0	0	0	0	0	1
119226255	SP1	GeneID:6667	transcription factor Sp1 [Mus musculus]	1	1	1	0	0	0	1.11413e+06	0	0	0	1
124244104	ATXN2	NOT_in_TF_list	ataxin-2 [Mus musculus]	3	3	3	0	297534	0	3.10948e+06	0	1	0	2
158711702	MGAT1	NOT_in_TF_list	alpha-1,3-mannosyl-glycoprotein 2-beta-N-acetylglucosaminyltransferase [Mus musculus]	1	1	1	0	0	0	0	0	1	0	0
255069795	VARS	NOT_in_TF_list	valine--tRNA ligase [Mus musculus]	4	4	8	0	1.7262e+06	0	3.75506e+06	0	2	0	6
227330633	PGM2	NOT_in_TF_list	phosphoglucomutase-2 [Mus musculus]	2	2	2	0	0	1.25434e+06	0	0	0	2	0
255958318	PRKACB	NOT_in_TF_list	cAMP-dependent protein kinase catalytic subunit beta isoform 2 [Mus musculus]	1	1	1	0	0	0	0	0	0	0	1
116089327	ADAM2	NOT_in_TF_list	disintegrin and metalloproteinase domain-containing protein 2 precursor [Mus musculus]	1	1	1	0	0	0	0	0	0	0	1
254910987	GM10697	NOT_in_TF_list	predicted gene 10697 [Mus musculus]	1	1	2	0	2.64448e+07	0	0	0	2	0	0
28461141	TAF7	NOT_in_TF_list	transcription initiation factor TFIID subunit 7 isoform 1 [Mus musculus]	1	1	1	0	7.35044e+06	0	0	0	1	0	0
31542003	CCNY	NOT_in_TF_list	cyclin-Y [Mus musculus]	2	2	2	0	0	7.72084e+06	843404	0	0	1	1
46358407	RNF216	NOT_in_TF_list	E3 ubiquitin-protein ligase RNF216 isoform A [Mus musculus]	1	1	2	0	0	0	0	0	0	2	0
13195618	CHMP1B	NOT_in_TF_list	charged multivesicular body protein 1b-1 [Mus musculus]	1	1	1	0	0	986345	0	0	0	1	0
26787989	MRPL28	GeneID:10573	39S ribosomal protein L28, mitochondrial [Mus musculus]	1	1	1	0	0	3964915	0	0	0	1	0
111038118	HADH	NOT_in_TF_list	hydroxyacyl-coenzyme A dehydrogenase, mitochondrial precursor [Mus musculus]	1	1	2	1.05842e+06	0	1.99327e+06	0	1	0	1	0
226423895	CAMP	NOT_in_TF_list	cathelin-related antimicrobial peptide precursor [Mus musculus]	1	1	1	0	0	0	754137	0	0	0	1
358356424	MisMatch	NOT_in_TF_list	heparan sulfate glucosamine 3-O-sulfotransferase 5 [Mus musculus]	1	1	3	0	0	3.56365e+06	0	0	0	3	0
117414176	VEZF1	GeneID:7716	vascular endothelial zinc finger 1 [Mus musculus]	1	2	2	0	0	2.28222e+06	4.23861e+07	0	0	1	1
15022805	HMG20A	GeneID:10363	high mobility group protein 20A [Mus musculus]	1	1	3	0	1.04288e+06	0	1.53133e+06	0	2	0	1
6679383	SERPINF2	NOT_in_TF_list	alpha-2-antiplasmin precursor [Mus musculus]	1	1	1	0	0	0	3.74291e+06	0	0	0	1
124486829	ARHGEF26	NOT_in_TF_list	rho guanine nucleotide exchange factor 26 [Mus musculus]	2	2	2	0	0	0	1.45827e+06	0	1	0	1
19527038	AI597479	NOT_in_TF_list	ashwin [Mus musculus]	1	1	1	0	0	2.73263e+06	0	0	0	1	0
21312844	LRRC48	NOT_in_TF_list	leucine-rich repeat-containing protein 48 [Mus musculus]	1	1	1	0	0	0	0	0	1	0	0
27369930	4632411B12RIK	NOT_in_TF_list	KAT8 regulatory NSL complex subunit 3 [Mus musculus]	2	2	2	0	0	0	0	0	1	0	1
254553372	IARS	NOT_in_TF_list	isoleucine--tRNA ligase, cytoplasmic [Mus musculus]	5	5	5	0	0	0	3.37871e+06	0	0	0	5
166091474	MSL1	NOT_in_TF_list	male-specific lethal 1 homolog [Mus musculus]	1	1	1	0	0	886433	0	0	0	1	0
304434574	PHC2	NOT_in_TF_list	polyhomeotic-like protein 2 isoform B [Mus musculus]	1	1	1	0	2.58035e+06	0	0	0	1	0	0
294979218	ETL4	NOT_in_TF_list	sickle tail protein isoform e [Mus musculus]	5	5	5	0	0	0	1.67925e+06	0	0	0	5
19527184	TAF5L	NOT_in_TF_list	TAF5-like RNA polymerase II p300/CBP-associated factor-associated factor 65 kDa subunit 5L [Mus musculus]	2	2	2	0	0	1.33591e+06	0	0	0	2	0
358438105	MisMatch	NOT_in_TF_list	calcium-activated potassium channel subunit alpha-1 isoform 22 [Mus musculus]	1	1	1	0	0	0	0	0	0	1	0
244793002	YTHDC2	NOT_in_TF_list	probable ATP-dependent RNA helicase YTHDC2 [Mus musculus]	3	3	4	0	0	0	0	3	0	1	0
7106459	CLOCK	GeneID:9575	circadian locomoter output cycles protein kaput [Mus musculus]	3	3	3	0	550914	0	1.22136e+06	0	1	0	2
257467484	ZFP809	NOT_in_TF_list	zinc finger protein 809 isoform 2 [Mus musculus]	1	1	1	0	0	0	0	0	0	0	1
21919420	DHX35	NOT_in_TF_list	probable ATP-dependent RNA helicase DHX35 [Mus musculus]	2	2	2	0	0	1.5469e+06	0	0	0	2	0
22296599	FGD4	NOT_in_TF_list	FYVE, RhoGEF and PH domain-containing protein 4 isoform gamma [Mus musculus]	1	1	1	0	0	0	0	0	1	0	0
15426055	COPB1	NOT_in_TF_list	coatomer subunit beta [Mus musculus]	2	2	4	0	620962	0	611540	0	2	0	2
84579909	MAPK1	NOT_in_TF_list	mitogen-activated protein kinase 1 [Mus musculus]	1	1	1	0	0	0	1.24707e+06	0	0	0	1
111378397	GPLD1	NOT_in_TF_list	phosphatidylinositol-glycan-specific phospholipase D precursor [Mus musculus]	2	2	2	0	0	443796	0	0	0	2	0
6671766	CLK4	NOT_in_TF_list	dual specificity protein kinase CLK4 [Mus musculus]	1	1	1	0	0	0	636129	0	0	0	1
295148106	ABLIM2	NOT_in_TF_list	actin-binding LIM protein 2 isoform 6 [Mus musculus]	2	2	2	0	0	2.55701e+06	0	0	0	2	0
27370082	LENG8	NOT_in_TF_list	leukocyte receptor cluster member 8 homolog [Mus musculus]	2	2	2	0	2.91148e+06	0	1.27436e+06	0	1	0	1
77377293	MisMatch	NOT_in_TF_list	leucine-rich repeat-containing protein 41 [Mus musculus]	2	2	2	0	1.12687e+06	0	0	0	2	0	0
6755144	LGALS3BP	NOT_in_TF_list	galectin-3-binding protein precursor [Mus musculus]	1	1	1	0	0	356722	0	0	0	1	0
164663773	RASA1	NOT_in_TF_list	RAS p21 protein activator 1 [Mus musculus]	1	1	4	0	0	0	0	4	0	0	0
83921607	VPS72	NOT_in_TF_list	vacuolar protein sorting-associated protein 72 homolog [Mus musculus]	1	1	1	0	0	2.38294e+06	0	0	0	1	0
61740637	NEURL4	NOT_in_TF_list	neuralized-like protein 4 [Mus musculus]	1	1	1	0	0	0	0	1	0	0	0
30794468	2410001C21RIK	NOT_in_TF_list	protein RTF2 homolog [Mus musculus]	1	1	1	0	0	0	1.26585e+06	0	0	0	1
33468987	WDR48	NOT_in_TF_list	WD repeat-containing protein 48 [Mus musculus]	2	2	2	0	0	1.61776e+06	0	0	0	2	0
160333775	LDLRAP1	NOT_in_TF_list	low density lipoprotein receptor adapter protein 1 [Mus musculus]	1	1	1	0	0	0	1.68179e+06	0	0	0	1
124486789	PIK3R4	NOT_in_TF_list	phosphoinositide 3-kinase regulatory subunit 4 [Mus musculus]	1	1	1	35194957	0	0	0	1	0	0	0
31980703	AASS	NOT_in_TF_list	alpha-aminoadipic semialdehyde synthase, mitochondrial [Mus musculus]	3	3	4	0	2.13475e+06	0	4.00788e+06	0	2	0	2
121583906	MED1	NOT_in_TF_list	mediator of RNA polymerase II transcription subunit 1 isoform 2 [Mus musculus]	2	2	2	0	0	0	677749	0	0	0	2
171543866	ATP6V0A4	NOT_in_TF_list	V-type proton ATPase 116 kDa subunit a isoform 4 [Mus musculus]	1	1	1	0	0	0	448938	0	0	0	1
241982771	PI4KA	NOT_in_TF_list	phosphatidylinositol 4-kinase type 3 alpha [Mus musculus]	5	5	5	0	0	0	1.69839e+06	0	0	0	5
358679352	MisMatch	NOT_in_TF_list	muscleblind-like protein 1 isoform 2 [Mus musculus]	1	1	1	0	0	0	1.50274e+06	0	0	0	1
22550094	PRKAR2A	NOT_in_TF_list	cAMP-dependent protein kinase type II-alpha regulatory subunit [Mus musculus]	1	1	1	0	605199	0	0	0	1	0	0
124487145	1110037F02RIK	NOT_in_TF_list	protein virilizer homolog [Mus musculus]	6	6	6	0	0	0	2.56987e+06	0	0	0	6
299890779	DDX19B	NOT_in_TF_list	ATP-dependent RNA helicase DDX19B isoform 3 [Mus musculus]	1	1	1	0	0	388671	0	0	0	1	0
30520009	SUPT3H	NOT_in_TF_list	transcription initiation protein SPT3 homolog [Mus musculus]	1	1	1	0	0	0	1.77583e+06	0	0	0	1
13385670	MRPS34	NOT_in_TF_list	28S ribosomal protein S34, mitochondrial [Mus musculus]	1	1	1	0	0	1.86766e+06	0	0	0	1	0
86613790	COL5A2	NOT_in_TF_list	collagen alpha-2(V) chain precursor [Mus musculus]	1	1	1	0	0	0	0	1	0	0	0
120586999	BCL11B	GeneID:64919	B-cell lymphoma/leukemia 11B isoform b [Mus musculus]	1	1	1	0	0	0	0	1	0	0	0
284005509	PWP1	NOT_in_TF_list	periodic tryptophan protein 1 homolog [Mus musculus]	1	1	1	0	0	1.01527e+06	0	0	0	1	0
189491671	DIAP2	NOT_in_TF_list	protein diaphanous homolog 2 [Mus musculus]	3	3	3	0	0	0	2.37789e+06	0	1	0	2
80978932	CBL	NOT_in_TF_list	E3 ubiquitin-protein ligase CBL [Mus musculus]	1	1	1	0	0	0	0	1	0	0	0
21746169	ZC3HAV1	NOT_in_TF_list	zinc finger CCCH-type antiviral protein 1 isoform 2 [Mus musculus]	2	2	2	0	1.05123e+06	0	0	0	2	0	0
170784836	EPS15L1	NOT_in_TF_list	epidermal growth factor receptor substrate 15-like 1 isoform b [Mus musculus]	2	2	2	0	1.34689e+06	0	0	0	2	0	0
269847199	RBM10	NOT_in_TF_list	RNA-binding protein 10 isoform 3 [Mus musculus]	2	2	2	0	628952	0	0	0	2	0	0
312261230	LGALS8	NOT_in_TF_list	galectin-8 [Mus musculus]	1	1	1	237670	0	0	0	1	0	0	0
73661178	AGXT2	NOT_in_TF_list	alanine--glyoxylate aminotransferase 2, mitochondrial [Mus musculus]	2	2	2	0	947475	0	1.66503e+06	0	1	0	1
226437613	SYMPK	NOT_in_TF_list	symplekin [Mus musculus]	2	2	2	0	0	3.49046e+06	1.59136e+06	0	0	1	1
31560712	CSK	NOT_in_TF_list	tyrosine-protein kinase CSK [Mus musculus]	1	1	1	0	0	0	0	0	1	0	0
298676444	TADA2B	GeneID:93624	transcriptional adaptor 2B [Mus musculus]	1	1	1	0	0	0	1.22995e+06	0	0	0	1
31559918	NRD1	NOT_in_TF_list	nardilysin precursor [Mus musculus]	1	1	1	0	0	0	7.82359e+07	0	0	0	1
27532959	ALDH1L1	NOT_in_TF_list	cytosolic 10-formyltetrahydrofolate dehydrogenase [Mus musculus]	2	2	2	0	2.3498e+06	1.17691e+06	0	0	1	1	0
27229115	INTS10	NOT_in_TF_list	integrator complex subunit 10 [Mus musculus]	2	2	2	0	0	1.07851e+06	0	0	0	2	0
18485502	BBOX1	NOT_in_TF_list	gamma-butyrobetaine dioxygenase [Mus musculus]	1	1	1	0	459774	0	0	0	1	0	0
160298199	GNA14	NOT_in_TF_list	guanine nucleotide-binding protein subunit alpha-14 [Mus musculus]	1	1	1	0	1.85379e+06	0	0	0	1	0	0
226823359	COPA	NOT_in_TF_list	coatomer subunit alpha [Mus musculus]	3	3	3	0	0	0	1.70283e+06	0	0	0	3
8394490	TSNAX	NOT_in_TF_list	translin-associated protein X [Mus musculus]	1	1	1	0	50677870	0	0	0	1	0	0
20532338	SEH1L	NOT_in_TF_list	nucleoporin SEH1 isoform b [Mus musculus]	1	1	1	0	0	0	1.76853e+06	0	0	0	1
51243036	OSBPL8	NOT_in_TF_list	oxysterol-binding protein-like protein 8 isoform b [Mus musculus]	2	2	2	0	2.59292e+06	0	1.39747e+06	0	1	0	1
33859684	KIN	GeneID:22944	DNA/RNA-binding protein KIN17 [Mus musculus]	1	1	1	0	0	0	0	0	1	0	0
6755196	PSMA4	NOT_in_TF_list	proteasome subunit alpha type-4 [Mus musculus]	1	1	1	1.59674e+06	0	0	0	1	0	0	0
122114637	IKZF4	GeneID:64375	zinc finger protein Eos [Mus musculus]	1	1	1	0	9.31727e+07	0	0	0	1	0	0
163954951	CIRH1A	NOT_in_TF_list	cirhin [Mus musculus]	1	1	1	0	0	297940	0	0	0	1	0
226442845	EXT2	NOT_in_TF_list	exostosin-2 [Mus musculus]	1	1	1	0	0	0	0	0	0	0	1
189491857	PPFIA1	NOT_in_TF_list	liprin-alpha-1 isoform B [Mus musculus]	3	3	3	0	0	0	1.59359e+06	0	0	0	3
20270198	RRP8	NOT_in_TF_list	ribosomal RNA-processing protein 8 isoform 2 [Mus musculus]	1	1	1	0	0	1.22651e+06	0	0	0	1	0
19526976	DNTTIP1	NOT_in_TF_list	deoxynucleotidyltransferase terminal-interacting protein 1 [Mus musculus]	1	1	1	0	0	0	284418	0	0	0	1
157909801	TOMM40	NOT_in_TF_list	mitochondrial import receptor subunit TOM40 homolog [Mus musculus]	1	1	1	0	0	0	0	0	1	0	0
33859486	HPD	NOT_in_TF_list	4-hydroxyphenylpyruvate dioxygenase [Mus musculus]	1	1	2	0	1.63246e+06	0	1193122	0	1	0	1
33468969	TBL1X	NOT_in_TF_list	F-box-like/WD repeat-containing protein TBL1X [Mus musculus]	1	1	1	0	0	3.76382e+06	0	0	0	1	0
145587082	TRIO	NOT_in_TF_list	triple functional domain protein [Mus musculus]	3	3	4	0	0	0	0	3	0	1	0
21450339	MisMatch	NOT_in_TF_list	liver carboxylesterase B-1 precursor [Mus musculus]	1	2	2	0	0	6.15012e+06	0	0	0	2	0
51592076	SLC37A4	NOT_in_TF_list	glucose-6-phosphate translocase [Mus musculus]	1	1	1	0	0	1.51711e+06	0	0	0	1	0
451172117	MisMatch	NOT_in_TF_list	delta-aminolevulinic acid dehydratase [Mus musculus]	1	1	1	0	0	0	1.8556e+06	0	0	0	1
254826698	GLS2	NOT_in_TF_list	glutaminase liver isoform, mitochondrial precursor [Mus musculus]	1	1	1	0	0	259944	0	0	0	1	0
20137008	BGN	NOT_in_TF_list	biglycan precursor [Mus musculus]	1	1	1	151260	0	0	0	1	0	0	0
164698440	BYSL	NOT_in_TF_list	bystin [Mus musculus]	1	1	1	0	241938	0	0	0	1	0	0
23956334	QSOX2	NOT_in_TF_list	sulfhydryl oxidase 2 precursor [Mus musculus]	1	1	1	0	0	2.89247e+06	0	0	0	1	0
255069809	DDX28	NOT_in_TF_list	probable ATP-dependent RNA helicase DDX28 [Mus musculus]	1	1	1	0	0	95015.4	0	0	0	1	0
39540508	TRIM14	NOT_in_TF_list	tripartite motif-containing protein 14 [Mus musculus]	1	1	1	0	0	0	0	0	0	0	1
153792772	PKLR	NOT_in_TF_list	pyruvate kinase isozymes R/L isoform 2 [Mus musculus]	1	1	1	0	0	1.01978e+06	0	0	0	1	0
21450201	CBARA1	NOT_in_TF_list	calcium uptake protein 1, mitochondrial [Mus musculus]	2	2	2	0	0	0	1.05911e+06	0	0	0	2
157384965	VMN2R78	NOT_in_TF_list	vomeronasal 2, receptor 78 precursor [Mus musculus]	1	1	1	0	0	0	0	0	0	0	1
407262453	MisMatch	NOT_in_TF_list	PREDICTED: ribosomal biogenesis protein LAS1L [Mus musculus]	2	2	2	0	1.42972e+06	2.68189e+06	0	0	1	1	0
124487153	VMN2R28	NOT_in_TF_list	vomeronasal 2, receptor 28 precursor [Mus musculus]	1	1	2	0	3.10946e+06	0	0	0	2	0	0
29789024	SLC25A17	NOT_in_TF_list	peroxisomal membrane protein PMP34 [Mus musculus]	1	1	2	0	0	2.95209e+06	0	0	0	2	0
125347389	TRIM27	NOT_in_TF_list	zinc finger protein RFP [Mus musculus]	1	1	1	0	0	0	0	0	1	0	0
22129789	ANK3	NOT_in_TF_list	ankyrin-3 isoform g [Mus musculus]	2	2	2	0	2.45504e+06	0	0	0	2	0	0
148271093	PDCD7	NOT_in_TF_list	programmed cell death protein 7 [Mus musculus]	1	1	1	0	0	1.12289e+06	0	0	0	1	0
165972333	BRD3	NOT_in_TF_list	bromodomain-containing protein 3 isoform 2 [Mus musculus]	2	2	3	0	692811	0	547435	0	2	0	1
119226253	SEMA5A	NOT_in_TF_list	semaphorin-5A precursor [Mus musculus]	1	1	1	0	0	0	0	1	0	0	0
349732093	MisMatch	NOT_in_TF_list	CUGBP Elav-like family member 1 isoform 2 [Mus musculus]	1	1	2	0	1.05607e+06	0	214515	0	1	0	1
19526820	RP2H	NOT_in_TF_list	protein XRP2 [Mus musculus]	1	1	1	0	0	0	1.4189e+06	0	0	0	1
219275596	NARS	NOT_in_TF_list	asparagine--tRNA ligase, cytoplasmic isoform 2 [Mus musculus]	2	2	2	0	0	1.03031e+06	0	0	0	2	0
85701808	BC013712	NOT_in_TF_list	protein THEMIS2 [Mus musculus]	1	1	2	0	0	1.10319e+08	0	0	0	2	0
161760627	CDH2	NOT_in_TF_list	cadherin-2 precursor [Mus musculus]	1	1	1	0	1.19767e+06	0	0	0	1	0	0
74136557	ARID5B	GeneID:84159	AT-rich interactive domain-containing protein 5B [Mus musculus]	3	3	3	0	0	0	1.40076e+06	0	0	0	3
95113671	PMPCB	NOT_in_TF_list	mitochondrial-processing peptidase subunit beta precursor [Mus musculus]	1	2	2	0	0	0	3.18316e+06	0	0	0	2
31560090	PLBD2	NOT_in_TF_list	putative phospholipase B-like 2 precursor [Mus musculus]	1	1	1	0	0	255154	0	0	0	1	0
46395466	TES	NOT_in_TF_list	testin [Mus musculus]	1	1	1	0	3.81316e+06	0	0	0	1	0	0
125719159	CAMTA1	NOT_in_TF_list	calmodulin-binding transcription activator 1 isoform 1 [Mus musculus]	2	2	7	0	0	0	0	7	0	0	0
257900472	PELP1	NOT_in_TF_list	proline-, glutamic acid- and leucine-rich protein 1 [Mus musculus]	2	2	3	0	0	0	1.28845e+06	0	0	2	1
148747128	STT3A	NOT_in_TF_list	dolichyl-diphosphooligosaccharide--protein glycosyltransferase subunit STT3A [Mus musculus]	2	2	2	0	0	1.66706e+06	198676	0	0	1	1
76096375	DIDO1	NOT_in_TF_list	death-inducer obliterator 1 isoform 3 [Mus musculus]	5	5	6	0	494781	0	2.87871e+06	0	1	0	5
289629197	OLFR923	NOT_in_TF_list	olfactory receptor 923 [Mus musculus]	1	1	3	0	914726	0	4.0712e+06	0	1	0	2
83921589	FXR2	NOT_in_TF_list	fragile X mental retardation syndrome-related protein 2 [Mus musculus]	1	2	2	0	0	9.50994e+06	0	0	0	1	1
27369533	NUP93	NOT_in_TF_list	nuclear pore complex protein Nup93 [Mus musculus]	2	2	2	0	1.78815e+06	0	526865	0	1	0	1
29789351	NUP107	NOT_in_TF_list	nuclear pore complex protein Nup107 [Mus musculus]	2	2	4	0	2.44117e+06	0	1.90417e+06	0	2	0	2
71061462	ENTPD5	NOT_in_TF_list	ectonucleoside triphosphate diphosphohydrolase 5 isoform b precursor [Mus musculus]	1	1	2	0	853871	0	577380	0	1	0	1
124301227	NOC2L	NOT_in_TF_list	nucleolar complex protein 2 homolog [Mus musculus]	2	2	2	0	846928	0	0	0	2	0	0
254553468	SPATA5	NOT_in_TF_list	spermatogenesis-associated protein 5 isoform 2 [Mus musculus]	1	2	2	0	763042	0	0	0	2	0	0
226958456	HRG	NOT_in_TF_list	histidine-rich glycoprotein precursor [Mus musculus]	1	1	1	0	0	2.1545e+06	0	0	0	1	0
34328278	LMAN2	NOT_in_TF_list	vesicular integral-membrane protein VIP36 precursor [Mus musculus]	1	1	1	2.71753e+06	0	0	0	1	0	0	0
21312106	1700074P13RIK	NOT_in_TF_list	trypsin X5 precursor [Mus musculus]	1	1	48	601377776	7.42171e+08	907427984	2786155303	7	7	11	23
76563952	REXO4	NOT_in_TF_list	RNA exonuclease 4 [Mus musculus]	1	1	1	0	368457	0	0	0	1	0	0
49274632	SLC25A23	NOT_in_TF_list	calcium-binding mitochondrial carrier protein SCaMC-3 [Mus musculus]	1	1	1	0	1.17302e+06	0	0	0	1	0	0
340007432	MisMatch	NOT_in_TF_list	aryl hydrocarbon receptor nuclear translocator-like protein 1 isoform 2 [Mus musculus]	2	2	2	0	0	4.61247e+06	0	0	0	2	0
148238102	MAGEA10	NOT_in_TF_list	melanoma-associated antigen 10 [Mus musculus]	1	1	1	0	0	316130	0	0	0	1	0
6755234	BRD7	NOT_in_TF_list	bromodomain-containing protein 7 [Mus musculus]	1	1	2	0	2.14212e+06	3.13845e+06	0	0	1	1	0
7304947	CBX8	NOT_in_TF_list	chromobox protein homolog 8 [Mus musculus]	1	1	1	0	442033	0	0	0	1	0	0
116089355	FGFR2	NOT_in_TF_list	fibroblast growth factor receptor 2 isoform IIIb [Mus musculus]	1	1	1	0	0	0	4.453e+07	0	0	0	1
7949037	ECH1	NOT_in_TF_list	delta(3,5)-Delta(2,4)-dienoyl-CoA isomerase, mitochondrial precursor [Mus musculus]	1	1	1	0	0	701505	0	0	0	1	0
6680908	CDK5	NOT_in_TF_list	cyclin-dependent kinase 5 [Mus musculus]	1	1	1	0	0	0	0	0	0	1	0
226423933	COL3A1	NOT_in_TF_list	collagen alpha-1(III) chain precursor [Mus musculus]	2	2	2	0	0	0	0	2	0	0	0
7657011	DDB1	NOT_in_TF_list	DNA damage-binding protein 1 [Mus musculus]	3	3	3	0	0	0	1.54846e+07	0	0	0	3
124301201	NFXL1	NOT_in_TF_list	nuclear transcription factor, X-box binding-like 1 [Mus musculus]	1	1	1	0	0	0	0	1	0	0	0
6755160	EIF2AK2	NOT_in_TF_list	interferon-induced, double-stranded RNA-activated protein kinase [Mus musculus]	1	1	1	0	0	0	0	0	0	1	0
113195678	LAMP1	NOT_in_TF_list	lysosome-associated membrane glycoprotein 1 precursor [Mus musculus]	1	1	4	1.27053e+06	2.98982e+07	1.243e+08	3.23753e+06	1	1	1	1
254939539	MYO19	NOT_in_TF_list	unconventional myosin-XIX [Mus musculus]	2	2	2	0	1.88909e+06	0	0	0	2	0	0
158533976	FAF2	NOT_in_TF_list	FAS-associated factor 2 [Mus musculus]	1	1	1	0	599731	0	0	0	1	0	0
163644327	AQR	NOT_in_TF_list	intron-binding protein aquarius [Mus musculus]	3	3	3	0	0	0	1.80659e+06	0	0	0	3
132626693	MDC1	NOT_in_TF_list	mediator of DNA damage checkpoint protein 1 [Mus musculus]	3	3	4	0	0	0	8.18483e+06	0	0	0	4
407261476	MisMatch	NOT_in_TF_list	PREDICTED: cytochrome P450 2A5 [Mus musculus]	1	1	1	0	1.51198e+06	0	0	0	1	0	0
148368976	ADAP1	NOT_in_TF_list	centaurin, alpha 1 [Mus musculus]	1	1	1	0	0	0	2.05859e+06	0	0	0	1
50980303	MRPS27	NOT_in_TF_list	28S ribosomal protein S27, mitochondrial [Mus musculus]	1	1	1	0	652598	0	0	0	1	0	0
255918221	PIAS2	NOT_in_TF_list	E3 SUMO-protein ligase PIAS2 isoform 5 [Mus musculus]	1	1	1	0	0	979075	0	0	0	1	0
321267528	HTATSF1	NOT_in_TF_list	HIV Tat-specific factor 1 homolog [Mus musculus]	2	2	3	0	850241	0	1.10551e+06	0	2	0	1
10946932	NUP160	NOT_in_TF_list	nuclear pore complex protein Nup160 [Mus musculus]	2	2	3	0	1.55842e+06	0	2.01581e+06	0	1	0	2
22122331	OLAH	NOT_in_TF_list	S-acyl fatty acid synthase thioesterase, medium chain [Mus musculus]	1	1	1	0	0	0	9.37995e+06	0	0	0	1
40789092	RRP12	NOT_in_TF_list	RRP12-like protein [Mus musculus]	2	2	2	0	0	0	986017	0	0	0	2
166197675	RNMTL1	NOT_in_TF_list	RNA methyltransferase-like protein 1 [Mus musculus]	1	1	1	0	0	0	1.24017e+06	0	0	0	1
285402638	RNH1	NOT_in_TF_list	ribonuclease inhibitor isoform a [Mus musculus]	1	1	2	0	0	0	1.69964e+06	0	1	0	1
33413404	GPT	NOT_in_TF_list	alanine aminotransferase 1 [Mus musculus]	1	1	1	0	0	0	238813	0	0	0	1
295424118	RREB1	GeneID:6239	ras-responsive element-binding protein 1 isoform 2 [Mus musculus]	3	3	3	0	0	0	906167	0	0	0	3
23510313	WASF2	NOT_in_TF_list	wiskott-Aldrich syndrome protein family member 2 [Mus musculus]	1	1	1	0	0	2.10842e+06	0	0	0	1	0
119226247	SRSF5	NOT_in_TF_list	serine/arginine-rich splicing factor 5 [Mus musculus]	1	1	1	0	0	0	616369	0	0	0	1
88703055	RFX7	GeneID:64864	regulatory factor X domain containing 2 [Mus musculus]	1	1	1	0	0	0	0	0	0	1	0
8394024	PPP2CB	NOT_in_TF_list	serine/threonine-protein phosphatase 2A catalytic subunit beta isoform [Mus musculus]	1	1	1	0	0	0	978266	0	0	0	1
109627648	MCM3AP	NOT_in_TF_list	80 kDa MCM3-associated protein [Mus musculus]	4	4	4	0	0	0	962931	0	0	0	4
13385942	CS	NOT_in_TF_list	citrate synthase, mitochondrial precursor [Mus musculus]	1	1	1	0	841369	0	0	0	1	0	0
269308211	MAU2	NOT_in_TF_list	MAU2 chromatid cohesion factor homolog isoform 2 [Mus musculus]	2	2	2	0	0	1.06731e+06	0	0	0	2	0
8850219	HP	NOT_in_TF_list	haptoglobin precursor [Mus musculus]	1	1	2	0	0	0	3.45093e+07	0	0	0	2
111074529	COL12A1	NOT_in_TF_list	collagen alpha-1(XII) chain precursor [Mus musculus]	2	2	3	0	0	0	1.84835e+07	1	0	0	2
303521989	MYST2	NOT_in_TF_list	histone acetyltransferase KAT7 isoform 2 [Mus musculus]	1	1	1	0	0	875005	0	0	0	1	0
100815493	WAPAL	NOT_in_TF_list	wings apart-like protein homolog [Mus musculus]	3	3	3	0	0	0	2.33255e+07	0	0	0	3
85861252	UBXN4	NOT_in_TF_list	UBX domain-containing protein 4 [Mus musculus]	1	1	1	0	0	769659	0	0	0	1	0
267844815	RMND5A	NOT_in_TF_list	protein RMD5 homolog A [Mus musculus]	1	1	1	4.55689e+06	0	0	0	1	0	0	0
238624176	SS18	NOT_in_TF_list	protein SSXT isoform 4 [Mus musculus]	1	1	2	0	9.54411e+06	0	3.74641e+06	0	1	0	1
226532708	DNAJC14	NOT_in_TF_list	dnaJ homolog subfamily C member 14 [Mus musculus]	1	1	1	0	0	0	2.25642e+06	0	0	0	1
161702988	APOB	NOT_in_TF_list	apolipoprotein B-100 precursor [Mus musculus]	11	11	13	0	0	340564	1.53563e+08	0	0	1	12
42734493	SLITRK3	NOT_in_TF_list	SLIT and NTRK-like protein 3 precursor [Mus musculus]	1	1	1	0	0	0	0	1	0	0	0
83649741	WDR18	NOT_in_TF_list	WD repeat-containing protein 18 [Mus musculus]	1	1	1	0	0	0	1.00279e+07	0	0	0	1
39930417	EXOSC3	NOT_in_TF_list	exosome complex component RRP40 [Mus musculus]	1	1	1	0	0	3.81785e+06	0	0	0	1	0
100817039	MED15	NOT_in_TF_list	mediator of RNA polymerase II transcription subunit 15 isoform b [Mus musculus]	2	2	2	0	802245	0	2.40165e+06	0	1	0	1
165932364	2610528E23RIK	NOT_in_TF_list	protein CMSS1 [Mus musculus]	1	1	1	0	0	0	975528	0	0	0	1
165972313	GTPBP6	NOT_in_TF_list	putative GTP-binding protein 6 [Mus musculus]	1	1	1	0	235827	0	0	0	1	0	0
311893360	DCTN1	NOT_in_TF_list	dynactin subunit 1 isoform 3 [Mus musculus]	2	3	3	0	0	0	9.26763e+06	0	0	0	3
377833682	MisMatch	NOT_in_TF_list	PREDICTED: UDP-N-acetylhexosamine pyrophosphorylase [Mus musculus]	1	1	2	0	0	0	3.87347e+08	0	0	0	2
22128623	UMOD	NOT_in_TF_list	uromodulin precursor [Mus musculus]	2	2	5	4.89841e+07	7.12822e+07	24413779	4.38557e+07	2	1	1	1
158517942	WDR36	NOT_in_TF_list	WD repeat domain 36 isoform 2 [Mus musculus]	2	2	2	0	2.11566e+06	0	0	0	2	0	0
12963867	SCYL1	NOT_in_TF_list	N-terminal kinase-like protein [Mus musculus]	1	1	1	0	0	0	951625	0	0	0	1
56606027	NOL10	NOT_in_TF_list	nucleolar protein 10 [Mus musculus]	1	1	1	0	0	584929	0	0	0	1	0
46559391	BMI1	NOT_in_TF_list	polycomb complex protein BMI-1 [Mus musculus]	1	1	1	0	0	0	5.14322e+06	0	0	0	1
61742804	WDR20A	NOT_in_TF_list	WD repeat domain 20 [Mus musculus]	1	1	1	0	0	604031	0	0	0	1	0
116812875	SECISBP2	NOT_in_TF_list	selenocysteine insertion sequence-binding protein 2 [Mus musculus]	1	1	1	0	0	0	0	0	0	0	1
125625320	SP2	GeneID:6668	transcription factor Sp2 isoform 2 [Mus musculus]	1	1	1	0	0	333889	0	0	0	1	0
42600571	DHX37	NOT_in_TF_list	probable ATP-dependent RNA helicase DHX37 [Mus musculus]	3	3	3	0	0	0	2.76078e+06	0	0	0	3
171543886	PAH	NOT_in_TF_list	phenylalanine-4-hydroxylase [Mus musculus]	1	1	1	0	0	0	1.50388e+06	0	0	0	1
30424776	4930506M07RIK	NOT_in_TF_list	shootin-1 isoform 2 [Mus musculus]	1	1	2	0	2.32607e+06	0	2.56655e+06	0	1	0	1
70778897	GTPBP1	NOT_in_TF_list	GTP-binding protein 1 [Mus musculus]	1	1	1	0	0	1.78339e+06	0	0	0	1	0
133779004	PPHLN1	NOT_in_TF_list	periphilin-1 isoform 3 [Mus musculus]	1	1	1	0	0	0	985034	0	0	0	1
126157504	SRRM2	NOT_in_TF_list	serine/arginine repetitive matrix protein 2 [Mus musculus]	4	4	6	0	556635	2.08579e+06	0	0	1	5	0
85986589	ZFHX2	NOT_in_TF_list	zinc finger homeobox protein 2 [Mus musculus]	1	2	3	0	3.77039e+06	0	1.04339e+07	1	1	0	1
42734451	PAXIP1	NOT_in_TF_list	PAX-interacting protein 1 [Mus musculus]	2	2	2	0	0	0	1.48741e+06	0	1	0	1
226371684	ADAR	NOT_in_TF_list	double-stranded RNA-specific adenosine deaminase isoform 2 [Mus musculus]	2	2	2	0	0	0	1.62349e+06	0	1	0	1
134053905	PSMD11	NOT_in_TF_list	26S proteasome non-ATPase regulatory subunit 11 [Mus musculus]	1	1	1	0	0	0	774734	0	0	0	1
190684673	EPB4.1	NOT_in_TF_list	protein 4.1 isoform 3 [Mus musculus]	1	1	2	0	1.04026e+06	0	1.93351e+06	0	1	0	1
33468997	MAK16	NOT_in_TF_list	protein MAK16 homolog [Mus musculus]	1	1	1	0	1.83381e+06	0	0	0	1	0	0
21450209	UTP6	NOT_in_TF_list	U3 small nucleolar RNA-associated protein 6 homolog [Mus musculus]	1	1	1	0	0	779775	0	0	0	1	0
15778828	SHC1	NOT_in_TF_list	SHC-transforming protein 1 isoform b [Mus musculus]	1	1	1	0	890241	0	0	0	1	0	0
19527398	MBNL3	NOT_in_TF_list	muscleblind-like protein 3 [Mus musculus]	1	1	1	4.68428e+06	0	0	0	1	0	0	0
51491852	MARS	NOT_in_TF_list	methionine--tRNA ligase, cytoplasmic isoform 2 [Mus musculus]	2	2	2	0	468137	0	442113	0	1	0	1
12963757	ISYNA1	NOT_in_TF_list	inositol-3-phosphate synthase 1 [Mus musculus]	1	1	1	0	0	120423	0	0	0	1	0
251823812	MARK3	NOT_in_TF_list	MAP/microtubule affinity-regulating kinase 3 isoform 2 [Mus musculus]	1	1	1	0	0	578763	0	0	0	1	0
6752992	PARP2	NOT_in_TF_list	poly [ADP-ribose] polymerase 2 [Mus musculus]	1	1	1	0	0	200350	0	0	0	1	0
6680582	KLF3	GeneID:51274	Krueppel-like factor 3 [Mus musculus]	1	1	1	0	0	0	981311	0	0	0	1
124486997	MTAP9	NOT_in_TF_list	microtubule-associated protein 9 [Mus musculus]	1	1	1	0	0	3.71596e+07	0	0	0	1	0
26024345	LCOR	NOT_in_TF_list	ligand-dependent corepressor [Mus musculus]	1	1	1	0	462748	0	0	0	1	0	0
58037139	OXA1L	NOT_in_TF_list	mitochondrial inner membrane protein OXA1L [Mus musculus]	1	1	1	0	0	0	733579	0	0	0	1
257196177	ZNF512B	GeneID:57473	zinc finger protein 512B [Mus musculus]	1	1	1	0	0	0	3.28329e+06	0	0	0	1
226958612	RBM27	NOT_in_TF_list	RNA-binding protein 27 [Mus musculus]	2	2	3	0	0	0	1.56488e+06	0	0	0	3
6680684	AMBP	NOT_in_TF_list	protein AMBP precursor [Mus musculus]	1	1	1	0	0	462890	0	0	0	1	0
124487451	OSBPL7	NOT_in_TF_list	oxysterol-binding protein-related protein 7 [Mus musculus]	1	1	1	0	0	0	1.12625e+08	0	0	0	1
153791768	INTS7	NOT_in_TF_list	integrator complex subunit 7 [Mus musculus]	2	2	3	0	0	0	4.21555e+08	0	0	0	3
17975508	GBE1	NOT_in_TF_list	1,4-alpha-glucan-branching enzyme [Mus musculus]	1	1	1	0	0	735157	0	0	0	1	0
116063546	COL27A1	NOT_in_TF_list	collagen alpha-1(XXVII) chain precursor [Mus musculus]	1	1	1	0	0	0	0	1	0	0	0
169234729	LIN54	NOT_in_TF_list	protein lin-54 homolog [Mus musculus]	1	1	1	0	0	0	498578	0	0	0	1
45476573	EIF3E	NOT_in_TF_list	eukaryotic translation initiation factor 3 subunit E [Mus musculus]	1	1	1	0	0	0	3.73992e+06	0	0	0	1
253683445	COL4A5	NOT_in_TF_list	collagen, type IV, alpha 5 precursor [Mus musculus]	1	1	2	0	0	0	0	2	0	0	0
269954700	SEC24C	NOT_in_TF_list	Sec24 related gene family, member C isoform 2 [Mus musculus]	2	2	2	0	725624	0	0	0	2	0	0
268837283	5830433M19RIK	NOT_in_TF_list	caspase activity and apoptosis inhibitor 1 [Mus musculus]	1	1	1	0	1.23934e+06	0	0	0	1	0	0
21450253	ZDHHC5	NOT_in_TF_list	palmitoyltransferase ZDHHC5 [Mus musculus]	1	1	1	0	0	227467	0	0	0	1	0
78190507	XPO1	NOT_in_TF_list	exportin-1 [Mus musculus]	2	2	3	0	1.13249e+06	0	1.04353e+06	0	1	0	2
114205418	DAPK1	NOT_in_TF_list	death-associated protein kinase 1 [Mus musculus]	3	3	4	0	0	0	4.0395e+06	0	0	0	4
125656150	HSDL2	NOT_in_TF_list	hydroxysteroid dehydrogenase-like protein 2 [Mus musculus]	1	1	1	0	0	586335	0	0	0	1	0
78191779	DAAM1	NOT_in_TF_list	disheveled-associated activator of morphogenesis 1 [Mus musculus]	1	2	2	0	624073	22178165	0	0	1	1	0
31982535	SPATA7	NOT_in_TF_list	spermatogenesis-associated protein 7 homolog [Mus musculus]	1	2	2	0	0	4.10317e+07	0	0	0	2	0
124487291	CWF19L1	NOT_in_TF_list	CWF19-like protein 1 [Mus musculus]	1	1	1	0	0	0	731837	0	0	0	1
268831712	SKINT5	NOT_in_TF_list	selection and upkeep of intraepithelial T-cells protein 5 isoform 2 precursor [Mus musculus]	1	1	1	0	1.65509e+08	0	0	0	1	0	0
134152669	ARGLU1	NOT_in_TF_list	arginine and glutamate-rich protein 1 [Mus musculus]	1	1	1	0	0	0	6.2037e+06	0	0	0	1
6753556	CTSD	NOT_in_TF_list	cathepsin D precursor [Mus musculus]	1	1	1	0	0	1.09884e+06	0	0	0	1	0
240120093	GNL2	NOT_in_TF_list	nucleolar GTP-binding protein 2 [Mus musculus]	2	2	2	0	204766	0	2.07113e+06	0	1	0	1
358679309	MisMatch	NOT_in_TF_list	zinc finger protein 219 isoform 2 [Mus musculus]	1	1	1	0	0	0	0	0	1	0	0
161086924	ABCB4	NOT_in_TF_list	multidrug resistance protein 3 [Mus musculus]	2	2	2	0	0	694986	332512	0	0	1	1
147902443	KIF26A	NOT_in_TF_list	kinesin-like protein KIF26A [Mus musculus]	1	1	1	0	0	0	0	1	0	0	0
58037285	SUPT7L	NOT_in_TF_list	STAGA complex 65 subunit gamma [Mus musculus]	1	1	1	0	0	1.49133e+06	0	0	0	1	0
148747410	ARCN1	NOT_in_TF_list	coatomer subunit delta [Mus musculus]	1	1	1	0	0	901871	0	0	0	1	0
119637825	RUFY2	NOT_in_TF_list	RUN and FYVE domain-containing protein 2 [Mus musculus]	1	2	2	0	1.7006e+07	0	3.19397e+06	0	1	0	1
156151435	ACP5	NOT_in_TF_list	tartrate-resistant acid phosphatase type 5 precursor [Mus musculus]	1	1	1	0	0	2.09814e+06	0	0	0	1	0
113866026	GLIS3	GeneID:169792	zinc finger protein GLIS3 [Mus musculus]	1	1	1	0	0	0	3.16324e+07	0	0	0	1
85701644	FAM82A2	NOT_in_TF_list	regulator of microtubule dynamics protein 3 [Mus musculus]	1	1	1	0	0	1.83513e+06	0	0	0	1	0
6755210	PSMD13	NOT_in_TF_list	26S proteasome non-ATPase regulatory subunit 13 [Mus musculus]	1	1	1	0	0	0	685468	0	0	0	1
6756085	ZYX	NOT_in_TF_list	zyxin [Mus musculus]	1	1	1	0	0	2.48873e+06	0	0	0	1	0
6677905	GLG1	NOT_in_TF_list	Golgi apparatus protein 1 precursor [Mus musculus]	2	2	2	0	1.03659e+08	0	379715	0	1	0	1
359718971	MisMatch	NOT_in_TF_list	sodium channel protein type 5 subunit alpha isoform 2 [Mus musculus]	1	1	2	0	0	0	0	2	0	0	0
22122411	BC027231	NOT_in_TF_list	uncharacterized protein LOC212547 [Mus musculus]	1	1	1	0	0	820475	0	0	0	1	0
18390325	CXXC1	NOT_in_TF_list	cpG-binding protein [Mus musculus]	1	1	1	0	466260	0	0	0	1	0	0
164565411	COL5A1	NOT_in_TF_list	collagen alpha-1(V) chain precursor [Mus musculus]	1	1	1	0	0	0	0	1	0	0	0
6753172	BCL6	GeneID:604	B-cell lymphoma 6 protein homolog [Mus musculus]	1	1	1	0	0	1.12111e+08	0	0	0	1	0
[truncated: 337 more rows]

## Sheet: Pck1p #1 TFs
								iBAQ				# PSM				Minus NC (background binding) iBAQ
Accession					Description	Σ# Unique Peptides	Σ# PSMs	NC	V	D/C	D/C/I	NC	V	D/C	D/C/I	V	Dex/cAMP	D/C/I
90093349	ADNP	GeneID:23394	Mus musculus	Homeobox|Zinc finger, C2H2-type|Homeodomain-like|Zinc finger, C2H2-like	activity-dependent neuroprotector homeobox protein [Mus musculus]	1	2	0	0	0	1.77234e+06	0	0	0	2	0	0	1.77234e+06
54112427	AEBP2	GeneID:121536	Mus musculus	Zinc finger, C2H2-type|Zinc finger, C2H2-like	zinc finger protein AEBP2 isoform 1 [Mus musculus]	2	2	0	0	0	0	1	0	1	0	0	0	0
158508460	AHCTF1	GeneID:25909	Mus musculus	AT hook, DNA-binding motif	protein ELYS [Mus musculus]	62	167	0	1.85655e+07	3.55219e+07	8.83147e+07	0	23	36	108	1.85655e+07	3.55219e+07	8.83147e+07
124249109	ARID1A	GeneID:8289	Mus musculus	ARID/BRIGHT DNA-binding domain|Protein of unknown function DUF3518	AT-rich interactive domain-containing protein 1A [Mus musculus]	12	24	0	967450	0	1.4709e+07	0	3	0	21	967450	0	1.4709e+07
145553997	ARID1B	GeneID:57492	Mus musculus	ARID/BRIGHT DNA-binding domain|Protein of unknown function DUF3518	AT rich interactive domain 1B (Swi1 like) [Mus musculus]	17	28	0	3.19291e+06	4.83069e+06	1.27439e+07	0	1	1	26	3.19291e+06	4.83069e+06	1.27439e+07
262231796	ARID2	GeneID:196528	Mus musculus	ARID/BRIGHT DNA-binding domain|DNA-binding RFX|Zinc finger, C2H2-type|Winged helix-turn-helix transcription repressor DNA-binding|Zinc finger, C2H2-like	AT rich interactive domain 2 (ARID, RFX-like) [Mus musculus]	2	2	0	0	0	1.33108e+06	0	0	0	2	0	0	1.33108e+06
74136557	ARID5B	GeneID:84159	Mus musculus	ARID/BRIGHT DNA-binding domain	AT-rich interactive domain-containing protein 5B [Mus musculus]	3	3	0	0	0	1.40076e+06	0	0	0	3	0	0	1.40076e+06
26024213	ARX	GeneID:170302	Mus musculus	Homeobox, conserved site|Homeobox|Paired-like homeodomain protein, OAR|Homeodomain-like|Homeodomain-related	homeobox protein ARX [Mus musculus]	1	1	0	0	0	0	1	0	0	0	0	0	0
121949821	ATF4	GeneID:468	Mus musculus	Basic-leucine zipper (bZIP) transcription factor|bZIP transcription factor, bZIP-1	cyclic AMP-dependent transcription factor ATF-4 [Mus musculus]	5	8	0	4.28102e+06	0	6.30184e+06	0	1	0	7	4.28102e+06	0	6.30184e+06
7710022	BCL11A	GeneID:53335	Mus musculus	Zinc finger, C2H2-type|Zinc finger, C2H2-type/integrase, DNA-binding|Zinc finger, C2H2-like	B-cell lymphoma/leukemia 11A isoform 1 [Mus musculus]	1	2	0	0	0	0	2	0	0	0	0	0	0
120586999	BCL11B	GeneID:64919	Mus musculus	Zinc finger, C2H2-type|Zinc finger, C2H2-type/integrase, DNA-binding|Zinc finger, C2H2-like	B-cell lymphoma/leukemia 11B isoform b [Mus musculus]	1	1	0	0	0	0	1	0	0	0	0	0	0
6753172	BCL6	GeneID:604	Mus musculus	BTB/POZ-like|Zinc finger, C2H2-type|BTB/POZ fold|BTB/POZ|Zinc finger, C2H2-type/integrase, DNA-binding|Zinc finger, C2H2-like	B-cell lymphoma 6 protein homolog [Mus musculus]	1	1	0	0	1.12111e+08	0	0	0	1	0	0	1.12111e+08	0
22779899	CDC5L	GeneID:988	Mus musculus	SANT, DNA-binding|Homeodomain-like|Homeodomain-related|Myb, DNA-binding|HTH transcriptional regulator, Myb-type, DNA-binding|Myb transcription factor|Protein of unknown function DUF3351	cell division cycle 5-like protein [Mus musculus]	32	68	0	4.48035e+07	8.04144e+06	4.41167e+07	0	31	6	31	4.48035e+07	8.04144e+06	4.41167e+07
86198301	CEBPA	GeneID:1050	Mus musculus	Basic-leucine zipper (bZIP) transcription factor|Basic leucine zipper|CCAAT/enhancer-binding	CCAAT/enhancer-binding protein alpha [Mus musculus]	6	27	0	3.68933e+07	2.04781e+07	4.24515e+07	0	7	7	13	3.68933e+07	2.04781e+07	4.24515e+07
6753404	CEBPB	GeneID:1051	Mus musculus	Basic-leucine zipper (bZIP) transcription factor|Basic leucine zipper|CCAAT/enhancer-binding	CCAAT/enhancer-binding protein beta [Mus musculus]	12	64	0	4.05623e+06	3.70916e+07	3.92634e+08	0	2	13	49	4.05623e+06	3.70916e+07	3.92634e+08
67188876	CEBPZ	GeneID:10153	Mus musculus	CCAAT-binding factor|Armadillo-type fold	CCAAT/enhancer-binding protein zeta [Mus musculus]	1	1	0	1.51271e+06	0	0	0	1	0	0	1.51271e+06	0	0
7106459	CLOCK	GeneID:9575	Mus musculus	PAS|Helix-loop-helix DNA-binding domain|Helix-loop-helix DNA-binding|PAS fold-3|PAS fold|Nuclear translocator|PAC motif	circadian locomoter output cycles protein kaput [Mus musculus]	3	3	0	550914	0	1.22136e+06	0	1	0	2	550914	0	1.22136e+06
161086933	CREM	GeneID:1390	Homo sapiens	Coactivator CBP, pKID|Basic-leucine zipper (bZIP) transcription factor|bZIP transcription factor, bZIP-1|cAMP response element binding (CREB) protein	cAMP-responsive element modulator isoform 4 [Mus musculus]	1	2	0	0	0	3.371e+06	0	0	0	2	0	0	3.371e+06
20806532	CSDA	GeneID:8531	Mus musculus	Cold-shock conserved site|Cold-shock protein, DNA-binding|Cold shock protein|Nucleic acid-binding, OB-fold|Nucleic acid-binding, OB-fold-like	Y-box-binding protein 3 short isoform [Mus musculus]	1	8	0	1.43113e+07	0	8.49401e+06	0	5	0	3	1.43113e+07	0	8.49401e+06
124487069	CTCFL	GeneID:140690	Mus musculus	Zinc finger, C2H2-type|Zinc finger, C2H2-type/integrase, DNA-binding|Zinc finger, C2H2-like	transcriptional repressor CTCFL [Mus musculus]	1	1	0	0	0	6.83536e+06	0	0	0	1	0	0	6.83536e+06
110835729	CUX1	GeneID:1523	Mus musculus	Homeobox, conserved site|Homeobox|Homeodomain protein CUT|Homeodomain-like|Homeodomain-related|CASP, C-terminal	protein CASP isoform a [Mus musculus]	2	2	0	0	0	1.13795e+06	0	0	0	2	0	0	1.13795e+06
12963557	DMAP1	GeneID:55929	Mus musculus	SANT, DNA-binding|DNA methyltransferase 1-associated 1	DNA methyltransferase 1-associated protein 1 [Mus musculus]	8	9	0	0	4.9055e+06	1.72013e+06	0	0	8	1	0	4.9055e+06	1.72013e+06
300192993	DNAJC1	GeneID:64215	Mus musculus	Heat shock protein DnaJ, conserved site|SANT, DNA-binding|Heat shock protein DnaJ, N-terminal|Homeodomain-like|Myb, DNA-binding|SANT, eukarya|Heat shock protein DnaJ|Molecular chaperone, heat shock protein, Hsp40, DnaJ	dnaJ homolog subfamily C member 1 precursor [Mus musculus]	1	1	0	0	700593	0	0	0	1	0	0	700593	0
6677659	DNAJC2	GeneID:27000	Mus musculus	Heat shock protein DnaJ, conserved site|SANT, DNA-binding|Heat shock protein DnaJ, N-terminal|Homeodomain-like|Myb, DNA-binding|SANT, eukarya|Molecular chaperone, heat shock protein, Hsp40, DnaJ	dnaJ homolog subfamily C member 2 [Mus musculus]	5	6	0	1.16069e+06	2.76817e+06	0	0	1	5	0	1.16069e+06	2.76817e+06	0
21313424	DRAP1	GeneID:10589	Mus musculus	Transcription factor CBF/NF-Y/archaeal histone|Histone-fold	dr1-associated corepressor [Mus musculus]	3	3	0	0	9.9312e+06	0	0	0	3	0	0	9.9312e+06	0
83523736	E2F3	GeneID:1871	Mus musculus	Transcription factor E2F/dimerisation partner (TDP)|Winged helix-turn-helix transcription repressor DNA-binding|E2F Family	transcription factor E2F3 [Mus musculus]	3	6	0	5.03254e+06	0	4.24046e+06	0	4	0	2	5.03254e+06	0	4.24046e+06
67972650	E2F8	GeneID:79733	Mus musculus	Transcription factor E2F/dimerisation partner (TDP)|Winged helix-turn-helix transcription repressor DNA-binding|E2F Family	transcription factor E2F8 [Mus musculus]	1	1	0	0	3.47975e+07	0	0	0	1	0	0	3.47975e+07	0
12963705	ELF2	GeneID:1998	Mus musculus	Ets|Winged helix-turn-helix transcription repressor DNA-binding|Transcription factor Elf-1, N-terminal	ETS-related transcription factor Elf-2 [Mus musculus]	2	2	0	0	2.40231e+06	0	0	0	2	0	0	2.40231e+06	0
153792362	ELK4	GeneID:2005	Mus musculus	Ets|Winged helix-turn-helix transcription repressor DNA-binding	ETS domain-containing protein Elk-4 [Mus musculus]	1	1	0	0	2.2568e+06	0	0	0	1	0	0	2.2568e+06	0
157057552	EN1	GeneID:2019	Mus musculus	Homeobox, conserved site|Homeobox engrailed-type, conserved site|Homeobox engrailed|Homeobox|Homeodomain-like|Homeodomain-related|Homeobox engrailed, C-terminal|Homeobox protein, engrailed|Homeobox, region	homeobox protein engrailed-1 [Mus musculus]	1	1	0	0	1.95448e+06	0	0	0	1	0	0	1.95448e+06	0
112293262	ESRRA	GeneID:2101	Mus musculus	Nuclear hormone receptor, ligand-binding, core|Zinc finger, nuclear hormone receptor-type|Nuclear hormone receptor, ligand-binding|Zinc finger, NHR/GATA-type|Retinoid X receptor|Steroid hormone receptor	steroid hormone receptor ERR1 [Mus musculus]	4	5	0	5.84671e+06	0	3.87535e+06	0	2	0	3	5.84671e+06	0	3.87535e+06
153945804	FOXA2	GeneID:3170	Mus musculus	Transcription factor, fork head, conserved site|Transcription factor, fork head|Winged helix-turn-helix transcription repressor DNA-binding|Fork-head N-terminal|Forkhead box protein, C-terminal	hepatocyte nuclear factor 3-beta [Mus musculus]	1	1	0	0	0	1.73164e+06	0	0	0	1	0	0	1.73164e+06
82546826	FOXK1	GeneID:221937	Mus musculus	Transcription factor, fork head, conserved site|Forkhead-associated|Transcription factor, fork head|SMAD/FHA domain	forkhead box protein K1 [Mus musculus]	10	12	0	2.37443e+06	2.97876e+06	1.2147e+07	0	2	1	9	2.37443e+06	2.97876e+06	1.2147e+07
238018071	FOXK2	GeneID:3607	Mus musculus	Transcription factor, fork head, conserved site|Forkhead-associated|Transcription factor, fork head|SMAD/FHA domain	forkhead box protein K2 [Mus musculus]	4	4	0	0	1.73654e+06	0	1	0	2	1	0	1.73654e+06	0
34328255	FOXO1	GeneID:2308	Mus musculus	Transcription factor, fork head, conserved site|Transcription factor, fork head|Winged helix-turn-helix transcription repressor DNA-binding	forkhead box protein O1 [Mus musculus]	1	1	0	0	1.24393e+06	0	0	0	1	0	0	1.24393e+06	0
46909569	GATA4	GeneID:2626	Mus musculus	Zinc finger, GATA-type|GATA-type transcription activator, N-terminal|Zinc finger, NHR/GATA-type|Transcription factor GATA-4/5/6	transcription factor GATA-4 [Mus musculus]	5	18	0	2.37219e+07	1.39648e+06	1.90199e+07	0	9	2	7	2.37219e+07	1.39648e+06	1.90199e+07
46909571	GATA6	GeneID:2627	Mus musculus	Zinc finger, GATA-type|GATA-type transcription activator, N-terminal|Zinc finger, NHR/GATA-type	transcription factor GATA-6 [Mus musculus]	3	3	0	0	3.97712e+06	1.4508e+06	0	0	2	1	0	3.97712e+06	1.4508e+06
164519134	GATAD2A	GeneID:54815	Mus musculus	Zinc finger, GATA-type	transcriptional repressor p66 alpha isoform b [Mus musculus]	17	23	0	1.96547e+06	2.45819e+07	0	0	3	20	0	1.96547e+06	2.45819e+07	0
21314854	GATAD2B	GeneID:57459	Mus musculus	Zinc finger, GATA-type	transcriptional repressor p66-beta [Mus musculus]	11	15	0	0	1.78143e+07	0	0	0	15	0	0	1.78143e+07	0
113866026	GLIS3	GeneID:169792	Mus musculus	Zinc finger, C2H2-type|Zinc finger, C2H2-like	zinc finger protein GLIS3 [Mus musculus]	1	1	0	0	0	3.16324e+07	0	0	0	1	0	0	3.16324e+07
37718989	GMEB2	GeneID:26205	Mus musculus	SAND|SAND-like	glucocorticoid modulatory element-binding protein 2 [Mus musculus]	1	2	0	0	0	0	2	0	0	0	0	0	0
70887767	HIC2	GeneID:23119	Mus musculus	BTB/POZ-like|Zinc finger, C2H2-type|BTB/POZ fold|BTB/POZ|Zinc finger, C2H2-type/integrase, DNA-binding|Zinc finger, C2H2-like	hypermethylated in cancer 2 protein [Mus musculus]	1	1	0	0	1.65576e+06	0	0	0	1	0	0	1.65576e+06	0
124107625	HIVEP3	GeneID:59269	Mus musculus	Zinc finger, C2H2-type|Zinc finger, C2H2-type/integrase, DNA-binding|Zinc finger, C2H2-like	transcription factor HIVEP3 [Mus musculus]	1	1	0	0	0	0	0	0	1	0	0	0	0
31542626	HMBOX1	GeneID:79618	Mus musculus	Homeobox|Hepatocyte nuclear factor 1, N-terminal|Homeodomain-like|Lambda repressor-like, DNA-binding|Homeodomain-related	homeobox-containing protein 1 [Mus musculus]	7	19	0	1.75949e+07	1.81727e+07	6.53759e+06	0	8	6	5	1.75949e+07	1.81727e+07	6.53759e+06
15022805	HMG20A	GeneID:10363	Mus musculus	High mobility group, HMG1/HMG2|High mobility group, superfamily	high mobility group protein 20A [Mus musculus]	1	3	0	1.04288e+06	0	1.53133e+06	0	2	0	1	1.04288e+06	0	1.53133e+06
253683481	HMG20B	GeneID:10362	Mus musculus	High mobility group, HMG1/HMG2, subgroup|High mobility group, HMG1/HMG2|High mobility group, superfamily	SWI/SNF-related matrix-associated actin-dependent regulator of chromatin subfamily E member 1-related [Mus musculus]	1	1	0	0	0	2.20054e+06	0	0	0	1	0	0	2.20054e+06
262331511	HMGA1	GeneID:3159	Mus musculus	HMG-I/HMG-Y, DNA-binding, conserved site|AT hook, DNA-binding motif|High mobility group, HMG-I/HMG-Y|A.T hook-like	high mobility group protein HMG-I/HMG-Y isoform c [Mus musculus]	2	3	0	0	2.17327e+07	0	0	0	3	0	0	2.17327e+07	0
6680231	HMGB3	GeneID:3149	Mus musculus	HMG box A DNA-binding domain, conserved site|High mobility group, HMG1/HMG2, subgroup|High mobility group, HMG1/HMG2|High mobility group, superfamily	high mobility group protein B3 [Mus musculus]	3	4	0	0	2.87004e+07	0	0	0	4	0	0	2.87004e+07	0
133778915	HMGN5	GeneID:79366	Mus musculus	High mobility group protein HMG14/HMG17	high mobility group nucleosome-binding domain-containing protein 5 [Mus musculus]	1	1	0	0	2.69634e+06	0	0	0	1	0	0	2.69634e+06	0
166295202	HNF1A	GeneID:6927	Mus musculus	Homeobox|Hepatocyte nuclear factor 1, beta isoform, C-terminal|Hepatocyte nuclear factor 1, alpha isoform C-terminal|Hepatocyte nuclear factor 1, N-terminal|Homeodomain-like|Lambda repressor-like, DNA-binding|Homeodomain-related	hepatocyte nuclear factor 1-alpha [Mus musculus]	7	19	0	2.57179e+07	1.63163e+07	9.34701e+06	0	8	8	3	2.57179e+07	1.63163e+07	9.34701e+06
46575916	HNF4A	GeneID:3172	Mus musculus	Nuclear hormone receptor, ligand-binding, core|Zinc finger, nuclear hormone receptor-type|Nuclear hormone receptor, ligand-binding|Retinoid X receptor|Steroid hormone receptor	hepatocyte nuclear factor 4-alpha [Mus musculus]	3	5	0	5.81784e+06	0	7.4062e+06	0	2	0	3	5.81784e+06	0	7.4062e+06
120300925	HOXB3	GeneID:3213	Mus musculus	Homeobox protein, antennapedia type, conserved site|Homeobox, conserved site|Homeobox|Homeodomain-like|Homeodomain-related|Homeobox, region	homeobox protein Hox-B3 [Mus musculus]	4	5	0	0	0	0	3	0	2	0	0	0	0
122114637	IKZF4	GeneID:64375	Mus musculus	Zinc finger, C2H2-type|Zinc finger, C2H2-type/integrase, DNA-binding|Zinc finger, C2H2-like	zinc finger protein Eos [Mus musculus]	1	1	0	9.31727e+07	0	0	0	1	0	0	9.31727e+07	0	0
8393627	IRF3	GeneID:3661	-	Interferon regulatory factor, conserved site|Interferon regulatory factor|SMAD/FHA domain|Winged helix-turn-helix transcription repressor DNA-binding|SMAD domain-like|Interferon regulatory factor-3	interferon regulatory factor 3 [Mus musculus]	4	4	0	5.07978e+06	0	0	0	4	0	0	5.07978e+06	0	0
55741685	IRX3	GeneID:79191	Mus musculus	Homeobox, conserved site|Homeobox|Iroquois-class homeodomain protein|Homeodomain-like|Homeodomain-related	iroquois-class homeodomain protein IRX-3 isoform 2 [Mus musculus]	2	2	0	0	0	0	1	1	0	0	0	0	0
6754402	JUN	GeneID:3725	Mus musculus	Basic-leucine zipper (bZIP) transcription factor|Jun-like transcription factor|Eukaryotic transcription factor, Skn-1-like, DNA-binding|bZIP transcription factor, bZIP-1|Transcription factor Jun|c-Jun Transcription Factor	transcription factor AP-1 [Mus musculus]	1	1	0	0	0	0	0	1	0	0	0	0	0
33859684	KIN	GeneID:22944	Mus musculus	Zinc finger, C2H2-like|DNA/RNA-binding protein Kin17, conserved region	DNA/RNA-binding protein KIN17 [Mus musculus]	1	1	0	0	0	0	0	1	0	0	0	0	0
31981130	KLF13	GeneID:51621	Mus musculus	Zinc finger, C2H2-type|Zinc finger, C2H2-type/integrase, DNA-binding|Zinc finger, C2H2-like	Krueppel-like factor 13 [Mus musculus]	2	2	0	0	0	777365	0	0	0	2	0	0	777365
6680582	KLF3	GeneID:51274	Mus musculus	Zinc finger, C2H2-type|Zinc finger, C2H2-type/integrase, DNA-binding|Zinc finger, C2H2-like	Krueppel-like factor 3 [Mus musculus]	1	1	0	0	0	981311	0	0	0	1	0	0	981311
6754608	MAFF	GeneID:23764	Mus musculus	Maf transcription factor|Basic-leucine zipper (bZIP) transcription factor|Eukaryotic transcription factor, Skn-1-like, DNA-binding	transcription factor MafF [Mus musculus]	1	1	0	0	1.08686e+06	0	0	0	1	0	0	1.08686e+06	0
114155153	MAZ	GeneID:4150	Mus musculus	Zinc finger, C2H2-type|Zinc finger, C2H2-type/integrase, DNA-binding|Zinc finger, C2H2-like	myc-associated zinc finger protein [Mus musculus]	2	2	0	0	0	1.19168e+06	0	0	0	2	0	0	1.19168e+06
31044421	MIS18BP1	GeneID:55320	Mus musculus	SANT, DNA-binding|Homeodomain-like|SANT associated|SANT, eukarya	mis18-binding protein 1 [Mus musculus]	1	1	0	0	0	7.47204e+06	0	0	0	1	0	0	7.47204e+06
295844817	MITF	GeneID:4286	Mus musculus	Helix-loop-helix DNA-binding domain|Helix-loop-helix DNA-binding|Protein of unknown function DUF3371	microphthalmia-associated transcription factor isoform 3 [Mus musculus]	3	10	0	2.24346e+07	5.0873e+07	1.31281e+07	0	1	7	2	2.24346e+07	5.0873e+07	1.31281e+07
162287033	MNT	GeneID:4335	Mus musculus	Helix-loop-helix DNA-binding domain|Helix-loop-helix DNA-binding	max-binding protein MNT [Mus musculus]	1	1	0	0	332658	0	0	0	1	0	0	332658	0
26787989	MRPL28	GeneID:10573	Mus musculus	p53-like transcription factor, DNA-binding	39S ribosomal protein L28, mitochondrial [Mus musculus]	1	1	0	0	3964915	0	0	0	1	0	0	3964915	0
91598896	MTA1	GeneID:9112	Mus musculus	Zinc finger, GATA-type|ELM2|SANT, DNA-binding|Bromo adjacent homology (BAH) domain|Homeodomain-like|SANT, eukarya	metastasis-associated protein MTA1 [Mus musculus]	2	13	0	0	2.99699e+07	2.42599e+07	0	1	9	3	0	2.99699e+07	2.42599e+07
51491880	MTA2	GeneID:9219	Mus musculus	Zinc finger, GATA-type|ELM2|SANT, DNA-binding|Bromo adjacent homology (BAH) domain|SANT, eukarya	metastasis-associated protein MTA2 [Mus musculus]	16	29	0	0	4.22412e+07	4.59416e+07	0	0	27	2	0	4.22412e+07	4.59416e+07
283806541	MTA3	GeneID:57504	Mus musculus	Zinc finger, GATA-type|ELM2|SANT, DNA-binding|Bromo adjacent homology (BAH) domain|Homeodomain-like|SANT, eukarya	metastasis-associated protein MTA3 isoform 4 [Mus musculus]	2	15	0	0	3.12284e+07	2.42599e+07	0	1	11	3	0	3.12284e+07	2.42599e+07
6754836	NFIA	GeneID:4774	Mus musculus	CTF transcription factor/nuclear factor 1, conserved site|MAD homology 1, Dwarfin-type|CTF transcription factor/nuclear factor 1, DNA-binding domain|CTF transcription factor/nuclear factor 1|CTF transcription factor/nuclear factor 1, N-terminal	nuclear factor 1 A-type isoform 2 [Mus musculus]	9	42	0	5.54402e+07	6.10071e+07	7.77576e+07	0	6	19	17	5.54402e+07	6.10071e+07	7.77576e+07
163965422	NFIB	GeneID:4781	Mus musculus	CTF transcription factor/nuclear factor 1, conserved site|MAD homology 1, Dwarfin-type|CTF transcription factor/nuclear factor 1, DNA-binding domain|CTF transcription factor/nuclear factor 1|CTF transcription factor/nuclear factor 1, N-terminal	nuclear factor 1 B-type isoform 2 [Mus musculus]	8	45	0	4.54537e+07	5.91212e+07	7.62816e+07	0	14	11	20	4.54537e+07	5.91212e+07	7.62816e+07
84370351	NFIC	GeneID:4782	Mus musculus	CTF transcription factor/nuclear factor 1, conserved site|MAD homology 1, Dwarfin-type|CTF transcription factor/nuclear factor 1, DNA-binding domain|CTF transcription factor/nuclear factor 1|CTF transcription factor/nuclear factor 1, N-terminal	nuclear factor 1 C-type isoform b [Mus musculus]	12	62	0	9.46808e+07	4.98773e+07	1.06804e+08	0	17	15	30	9.46808e+07	4.98773e+07	1.06804e+08
8393832	NFIL3	GeneID:4783	Mus musculus	Basic-leucine zipper (bZIP) transcription factor|Vertebrate interleukin-3 regulated transcription factor|Basic leucine zipper|Transcription factor, basic leucine zipper, E4BP4	nuclear factor interleukin-3-regulated protein [Mus musculus]	13	35	0	1.58303e+07	4.98192e+07	3.83935e+07	0	5	13	17	1.58303e+07	4.98192e+07	3.83935e+07
126517487	NFIX	GeneID:4784	Mus musculus	CTF transcription factor/nuclear factor 1, conserved site|MAD homology 1, Dwarfin-type|CTF transcription factor/nuclear factor 1, DNA-binding domain|CTF transcription factor/nuclear factor 1|CTF transcription factor/nuclear factor 1, N-terminal	nuclear factor 1 X-type isoform 1 [Mus musculus]	1	52	0	6.56768e+07	3.13499e+07	8.5177e+07	0	19	5	28	6.56768e+07	3.13499e+07	8.5177e+07
126517474	NFIX	GeneID:4784	Mus musculus	CTF transcription factor/nuclear factor 1, conserved site|MAD homology 1, Dwarfin-type|CTF transcription factor/nuclear factor 1, DNA-binding domain|CTF transcription factor/nuclear factor 1|CTF transcription factor/nuclear factor 1, N-terminal	nuclear factor 1 X-type isoform 3 [Mus musculus]	2	58	0	6.56768e+07	3.13499e+07	8.5177e+07	0	21	7	30	6.56768e+07	3.13499e+07	8.5177e+07
117606364	NFKB1	GeneID:4790	Mus musculus	Death|Cell surface receptor IPT/TIG|p53-like transcription factor, DNA-binding|DEATH-like|Rel homology|Immunoglobulin-like fold|Immunoglobulin E-set|Ankyrin repeat-containing domain|NF-kappa-B/Rel/dorsal|Ankyrin repeat	nuclear factor NF-kappa-B p105 subunit [Mus musculus]	1	1	0	983401	0	0	0	1	0	0	983401	0	0
40254249	NFRKB	GeneID:4798	Mus musculus	-	nuclear factor related to kappa-B-binding protein [Mus musculus]	13	15	0	0	0	6.96822e+06	0	0	0	15	0	0	6.96822e+06
188497644	NOC3L	GeneID:64318	Mus musculus	CCAAT-binding factor|Nucleolar complex-associated|Nucleolar complex-associated protein 3	nucleolar complex protein 3 homolog [Mus musculus]	2	2	0	1.18804e+06	0	0	0	2	0	0	1.18804e+06	0	0
171846245	NR2C1	GeneID:7181	Mus musculus	Nuclear hormone receptor, ligand-binding, core|Zinc finger, nuclear hormone receptor-type|Nuclear hormone receptor, ligand-binding|Zinc finger, NHR/GATA-type|Vitamin D receptor|Steroid hormone receptor	nuclear receptor subfamily 2 group C member 1 [Mus musculus]	5	5	0	0	4.63841e+06	0	0	0	5	0	0	4.63841e+06	0
67906168	NR2C2	GeneID:7182	Mus musculus	Nuclear hormone receptor, ligand-binding, core|Zinc finger, nuclear hormone receptor-type|Nuclear hormone receptor, ligand-binding|Zinc finger, NHR/GATA-type|Vitamin D receptor|Steroid hormone receptor	nuclear receptor subfamily 2 group C member 2 [Mus musculus]	11	11	0	0	8.21435e+06	0	0	0	11	0	0	8.21435e+06	0
73611910	NR2F2	GeneID:7026	Mus musculus	Nuclear hormone receptor, ligand-binding, core|Zinc finger, nuclear hormone receptor-type|Nuclear hormone receptor, ligand-binding|Zinc finger, NHR/GATA-type|Zinc finger, C4-type, C-terminal domain|Steroid hormone receptor|Transcription factor COUP	COUP transcription factor 2 isoform 2 [Mus musculus]	2	3	0	4.98361e+06	0	0	0	2	0	1	4.98361e+06	0	0
229335598	NR5A2	GeneID:2494	Mus musculus	Nuclear hormone receptor, ligand-binding, core|Zinc finger, nuclear hormone receptor-type|Nuclear hormone receptor, ligand-binding|Zinc finger, NHR/GATA-type|Vitamin D receptor|Steroid hormone receptor|Orphan nuclear receptor Fushi-tarazu factor 1	nuclear receptor subfamily 5 group A member 2 isoform 2 [Mus musculus]	5	7	0	8.48497e+06	0	3.12651e+06	0	5	0	2	8.48497e+06	0	3.12651e+06
255982548	NRF1	GeneID:4899	Mus musculus	Nuclear respiratory factor-1, activation binding domain|Nuclear respiratory factor 1, NLS/DNA-binding, dimerisation domain	nuclear respiratory factor 1 isoform c [Mus musculus]	3	3	0	0	8.97508e+06	0	0	0	3	0	0	8.97508e+06	0
119220568	ONECUT2	GeneID:9480	Mus musculus	Homeobox|Homeodomain protein CUT|Homeodomain-like|Homeodomain-related	one cut domain family member 2 [Mus musculus]	5	6	0	5.13859e+06	1.08246e+06	0	0	4	2	0	5.13859e+06	1.08246e+06	0
7110681	PBX1	GeneID:5087	Mus musculus	Homeobox, conserved site|Homeobox|PBX|Homeodomain-like|Homeodomain-related	pre-B-cell leukemia transcription factor 1 isoform b [Mus musculus]	1	2	0	2931527	0	0	0	2	0	0	2931527	0	0
8567384	PBX2	GeneID:5089	Mus musculus	Homeobox, conserved site|Homeobox|PBX|Homeodomain-like|Homeodomain-related	pre-B-cell leukemia transcription factor 2 [Mus musculus]	2	3	0	2.63993e+06	0	3.86139e+06	0	2	0	1	2.63993e+06	0	3.86139e+06
66955886	PDS5B	GeneID:23047	Mus musculus	AT hook, DNA-binding motif|Armadillo-type fold	sister chromatid cohesion protein PDS5 homolog B [Mus musculus]	37	90	0	5.16966e+06	427962	8.94555e+07	0	14	2	74	5.16966e+06	427962	8.94555e+07
114431256	POU2F1	GeneID:5451	Mus musculus	Homeobox, conserved site|POU-specific|Octamer-binding transcription factor|Homeobox|Homeodomain-like|Lambda repressor-like, DNA-binding|Homeodomain-related|POU	POU domain, class 2, transcription factor 1 isoform L [Mus musculus]	4	6	0	2.24095e+06	628419	2.15975e+06	0	3	1	2	2.24095e+06	628419	2.15975e+06
47059067	POU4F2	GeneID:5458	Mus musculus	Homeobox, conserved site|POU-specific|Homeobox|Homeodomain-like|Lambda repressor-like, DNA-binding|Homeodomain-related|POU|POU domain-containing protein, class 4-related	POU domain, class 4, transcription factor 2 [Mus musculus]	1	2	0	0	0	0	1	0	1	0	0	0	0
295789156	PRDM16	GeneID:63976	Mus musculus	SET domain|Zinc finger, C2H2-type|Zinc finger, C2H2-type/integrase, DNA-binding|Zinc finger, C2H2-like	PR domain zinc finger protein 16 isoform 2 [Mus musculus]	1	1	0	1.15553e+07	0	0	0	1	0	0	1.15553e+07	0	0
6679483	PROX1	GeneID:5629	Mus musculus	Homeodomain-like|Homeobox prospero-like	prospero homeobox protein 1 [Mus musculus]	1	1	0	560627	0	0	0	1	0	0	560627	0	0
188528630	RB1	GeneID:5925	Mus musculus	Retinoblastoma-associated protein, B-box|Retinoblastoma-associated protein, A-box|Cyclin|Cyclin-like|Cyclin-related|Rb C-terminal|Retinoblastoma-associated protein	retinoblastoma-associated protein [Mus musculus]	2	2	0	3.77534e+06	0	3.0863e+06	0	1	0	1	3.77534e+06	0	3.0863e+06
170932488	RBL2	GeneID:5934	Mus musculus	Retinoblastoma-associated protein, B-box|Retinoblastoma-associated protein, A-box|Cyclin|Cyclin-like|Cyclin-related	retinoblastoma-like protein 2 [Mus musculus]	1	1	0	0	0	1.37754e+06	0	0	0	1	0	0	1.37754e+06
124286785	RBPJ	GeneID:3516	Mus musculus	Cell surface receptor IPT/TIG|p53-like transcription factor, DNA-binding|Immunoglobulin-like fold|Immunoglobulin E-set|Beta-trefoil|LAG1, DNA binding	recombining binding protein suppressor of hairless isoform 3 [Mus musculus]	8	8	0	0	1.85948e+07	0	0	0	8	0	0	1.85948e+07	0
71037397	RFX5	GeneID:5993	Mus musculus	DNA-binding RFX|Winged helix-turn-helix transcription repressor DNA-binding	DNA-binding protein Rfx5 [Mus musculus]	10	11	0	0	9.31826e+06	0	0	0	11	0	0	9.31826e+06	0
88703055	RFX7	GeneID:64864	Mus musculus	DNA-binding RFX|Winged helix-turn-helix transcription repressor DNA-binding	regulatory factor X domain containing 2 [Mus musculus]	1	1	0	0	0	0	0	0	1	0	0	0	0
295424118	RREB1	GeneID:6239	Mus musculus	Zinc finger, C2H2-type|Zinc finger, C2H2-type/integrase, DNA-binding|Zinc finger, C2H2-like	ras-responsive element-binding protein 1 isoform 2 [Mus musculus]	3	3	0	0	0	906167	0	0	0	3	0	0	906167
161169031	RUNX1	GeneID:861	Homo sapiens	p53-like transcription factor, DNA-binding|p53/RUNT-type transcription factor, DNA-binding domain|Acute myeloid leukemia 1 (AML 1)/Runt|Runx inhibition|Acute myeloid leukemia 1 protein (AML 1)/Runt|Transcription factor, Runt-related, RUNX	runt-related transcription factor 1 isoform 3 [Mus musculus]	4	4	0	2.49063e+06	0	1.22304e+06	0	3	0	1	2.49063e+06	0	1.22304e+06
38348308	RYBP	GeneID:23429	Mus musculus	Zinc finger, RanBP2-type	RING1 and YY1-binding protein [Mus musculus]	3	4	0	0	3.83203e+06	0	0	0	4	0	0	3.83203e+06	0
159032064	SALL1	GeneID:6299	Mus musculus	Zinc finger, C2H2-type|Zinc finger, C2H2-type/integrase, DNA-binding|Zinc finger, C2H2-like	sal-like protein 1 [Mus musculus]	9	11	0	0	1.6022e+06	5.49265e+06	0	0	1	10	0	1.6022e+06	5.49265e+06
255683435	SKOR1	GeneID:390598	Mus musculus	Putative DNA binding domain|SAND-like|c-SKI Smad4 binding|Transforming protein Ski	SKI family transcriptional corepressor 1 isoform 4 [Mus musculus]	1	1	0	0	0	0	1	0	0	0	0	0	0
254675249	SMAD3	GeneID:4088	Mus musculus	SMAD domain, Dwarfin-type|MAD homology 1, Dwarfin-type|SMAD/FHA domain|MAD homology, MH1|SMAD domain-like|Dwarfin	mothers against decapentaplegic homolog 3 [Mus musculus]	2	2	0	3.81484e+06	0	675936	0	1	0	1	3.81484e+06	0	675936
31543224	SMAD4	GeneID:4089	Mus musculus	SMAD domain, Dwarfin-type|MAD homology 1, Dwarfin-type|SMAD/FHA domain|MAD homology, MH1|SMAD domain-like|Dwarfin	mothers against decapentaplegic homolog 4 [Mus musculus]	1	1	0	0	598549	0	0	0	1	0	0	598549	0
40254124	SMARCA5	GeneID:8467	Mus musculus	SNF2-related|SANT, DNA-binding|DNA/RNA helicase, C-terminal|Homeodomain-like|DEAD-like helicase, N-terminal|Helicase, superfamily 1/2, ATP-binding domain|ATPase, nucleosome remodelling ISWI, HAND domain|SLIDE|SANT, eukarya	SWI/SNF-related matrix-associated actin-dependent regulator of chromatin subfamily A member 5 [Mus musculus]	42	92	0	4.88405e+07	3.91521e+06	4.3588e+07	0	39	11	42	4.88405e+07	3.91521e+06	4.3588e+07
112421097	SMARCC1	GeneID:6599	Mus musculus	Chromo domain|SANT, DNA-binding|BRCT|SWIRM|Homeodomain-like|Myb, DNA-binding|SANT, eukarya	SWI/SNF complex subunit SMARCC1 [Mus musculus]	11	39	0	7.65483e+06	0	5.24244e+07	0	4	0	35	7.65483e+06	0	5.24244e+07
37718972	SMARCC2	GeneID:6601	Mus musculus	Chromo domain|SANT, DNA-binding|BRCT|SWIRM|Homeodomain-like|Myb, DNA-binding|SANT, eukarya	SWI/SNF complex subunit SMARCC2 isoform 3 [Mus musculus]	24	71	0	3.60277e+07	1.65541e+06	6.94021e+07	0	9	2	60	3.60277e+07	1.65541e+06	6.94021e+07
10181166	SMARCE1	GeneID:6605	Mus musculus	High mobility group, HMG1/HMG2|High mobility group, superfamily	SWI/SNF-related matrix-associated actin-dependent regulator of chromatin subfamily E member 1 [Mus musculus]	17	39	0	4.0439e+07	0	4.224e+07	0	15	0	24	4.0439e+07	0	4.224e+07
117606322	SOX1	GeneID:6656	Mus musculus	High mobility group, HMG1/HMG2|High mobility group, superfamily|Transcription factor SOX	transcription factor SOX-1 [Mus musculus]	2	2	0	0	0	0	2	0	0	0	0	0	0
127140986	SOX2	GeneID:6657	Mus musculus	High mobility group, HMG1/HMG2|High mobility group, superfamily|Transcription factor SOX	transcription factor SOX-2 [Mus musculus]	1	1	0	0	0	0	1	0	0	0	0	0	0
119226255	SP1	GeneID:6667	Mus musculus	Zinc finger, C2H2-type|Zinc finger, C2H2-type/integrase, DNA-binding|Zinc finger, C2H2-like	transcription factor Sp1 [Mus musculus]	1	1	0	0	0	1.11413e+06	0	0	0	1	0	0	1.11413e+06
125625320	SP2	GeneID:6668	Mus musculus	Zinc finger, C2H2-type|Zinc finger, C2H2-type/integrase, DNA-binding|Zinc finger, C2H2-like	transcription factor Sp2 isoform 2 [Mus musculus]	1	1	0	0	333889	0	0	0	1	0	0	333889	0
298676444	TADA2B	GeneID:93624	-	Zinc finger, ZZ-type|SANT, DNA-binding|Homeodomain-like|Myb, DNA-binding|SANT, eukarya|Transcriptional adaptor 2	transcriptional adaptor 2B [Mus musculus]	1	1	0	0	0	1.22995e+06	0	0	0	1	0	0	1.22995e+06
172073171	TBP	GeneID:6908	Mus musculus	Transcription factor TFIID, C-terminal/DNA glycosylase, N-terminal|Beta2-adaptin/TATA-box binding, C-terminal|TATA-box binding	TATA-box-binding protein [Mus musculus]	6	8	0	0	1.49927e+07	1.55931e+07	0	0	1	7	0	1.49927e+07	1.55931e+07
38327623	TBX3	GeneID:6926	Mus musculus	Transcription factor, T-box, conserved site|p53-like transcription factor, DNA-binding|Transcription factor, T-box	T-box transcription factor TBX3 isoform 2 [Mus musculus]	1	2	0	703005	0	554729	0	1	0	1	703005	0	554729
166706889	TCF20	GeneID:6942	Mus musculus	Zinc finger, PHD-type	transcription factor 20 isoform b [Mus musculus]	1	1	0	0	0	159321	0	0	0	1	0	0	159321
23346597	TCFAP2D	GeneID:83741	Mus musculus	Transcription factor AP-2, C-terminal|Transcription factor AP-2	transcription factor AP-2-delta [Mus musculus]	1	3	39016358	1.24285e+07	0	3.37915e+07	1	1	0	1	0	0	0
13626034	TCFAP4	GeneID:7023	Mus musculus	Helix-loop-helix DNA-binding domain|Helix-loop-helix DNA-binding	transcription factor AP-4 [Mus musculus]	9	17	0	1.22569e+07	0	5.01916e+06	0	12	0	5	1.22569e+07	0	5.01916e+06
15628025	TCFCP2	GeneID:7024	Mus musculus	CP2 transcription factor|Sterile alpha motif homology	alpha-globin transcription factor CP2 [Mus musculus]	1	3	0	0	2.19708e+07	0	0	0	3	0	0	2.19708e+07	0
134053939	TCFCP2L1	GeneID:29842	Mus musculus	CP2 transcription factor|Sterile alpha motif homology	transcription factor CP2-like protein 1 [Mus musculus]	1	1	0	0	1.22608e+06	0	0	0	1	0	0	1.22608e+06	0
262205252	TEAD1	GeneID:7003	Mus musculus	TEA/ATTS|Transcriptional enhancer factor	transcriptional enhancer factor TEF-1 isoform 3 [Mus musculus]	9	24	0	2.76416e+07	0	2.68023e+07	0	13	0	11	2.76416e+07	0	2.68023e+07
133904142	TERF2	GeneID:7014	Mus musculus	SANT, DNA-binding|Homeodomain-like|Homeodomain-related|Telomere repeat-binding factor, dimerisation domain|Myb, DNA-binding|HTH transcriptional regulator, Myb-type, DNA-binding|Telomeric repeat-binding factor 1, Pin2	telomeric repeat-binding factor 2 isoform 1 [Mus musculus]	12	17	0	958047	1.06059e+07	586376	0	1	15	1	958047	1.06059e+07	586376
160948575	TERF2IP	GeneID:54386	Mus musculus	Homeodomain-like|Homeodomain-related|Rap1 Myb	telomeric repeat-binding factor 2-interacting protein 1 [Mus musculus]	4	10	0	4.93669e+06	5.61524e+06	4.35664e+06	0	4	3	3	4.93669e+06	5.61524e+06	4.35664e+06
6678303	TFAM	GeneID:7019	Homo sapiens	High mobility group, HMG1/HMG2|High mobility group, superfamily	transcription factor A, mitochondrial precursor [Mus musculus]	10	16	0	2.27914e+07	7.65048e+07	0	0	1	15	0	2.27914e+07	7.65048e+07	0
6678305	TFDP1	GeneID:7027	Mus musculus	Transcription factor E2F/dimerisation partner (TDP)|Winged helix-turn-helix transcription repressor DNA-binding|Transcription factor DP, C-terminal|Transcription factor DP|Transcription factor DP, subgroup	transcription factor Dp-1 [Mus musculus]	4	7	0	3.14627e+06	0	5.86271e+06	0	3	0	4	3.14627e+06	0	5.86271e+06
166706895	TOX4	GeneID:9878	Mus musculus	High mobility group, HMG1/HMG2, subgroup|High mobility group, HMG1/HMG2|High mobility group, superfamily	TOX high mobility group box family member 4 [Mus musculus]	12	54	0	6.87319e+07	7.13586e+06	4.71147e+07	0	22	10	22	6.87319e+07	7.13586e+06	4.71147e+07
6755907	TWIST1	GeneID:7291	Mus musculus	Helix-loop-helix DNA-binding domain|Helix-loop-helix DNA-binding|Twist	twist-related protein 1 [Mus musculus]	1	1	0	0	0	0	1	0	0	0	0	0	0
7305605	UBP1	GeneID:7342	Mus musculus	CP2 transcription factor|Sterile alpha motif homology	upstream-binding protein 1 isoform b [Mus musculus]	12	18	0	0	3.39866e+07	0	0	0	18	0	0	3.39866e+07	0
113205057	UBTF	GeneID:7343	Mus musculus	High mobility group, HMG1/HMG2|High mobility group, superfamily	nucleolar transcription factor 1 isoform 1 [Mus musculus]	19	43	0	3.19192e+07	3.09297e+06	3.72011e+07	0	19	6	18	3.19192e+07	3.09297e+06	3.72011e+07
6678521	USF1	GeneID:7391	Mus musculus	Helix-loop-helix DNA-binding domain|Helix-loop-helix DNA-binding	upstream stimulatory factor 1 [Mus musculus]	1	3	0	3.71061e+06	0	2.12591e+06	0	2	0	1	3.71061e+06	0	2.12591e+06
117414176	VEZF1	GeneID:7716	Mus musculus	Zinc finger, C2H2-type|Zinc finger, C2H2-type/integrase, DNA-binding|Zinc finger, C2H2-like	vascular endothelial zinc finger 1 [Mus musculus]	1	2	0	0	2.28222e+06	4.23861e+07	0	0	1	1	0	2.28222e+06	4.23861e+07
294979205	WIZ	GeneID:58525	Mus musculus	Zinc finger, C2H2-type|Zinc finger, C2H2-like	protein Wiz isoform 1 [Mus musculus]	11	14	0	9.30271e+06	0	8.50966e+06	0	8	0	6	9.30271e+06	0	8.50966e+06
13775156	XBP1	GeneID:7494	Mus musculus	Basic-leucine zipper (bZIP) transcription factor|Basic leucine zipper	X-box-binding protein 1 isoform XBP1(U) [Mus musculus]	1	1	0	0	2.05356e+06	0	0	0	1	0	0	2.05356e+06	0
113205059	YBX1	GeneID:4904	Mus musculus	Cold-shock conserved site|Cold-shock protein, DNA-binding|Cold shock protein|Nucleic acid-binding, OB-fold|Nucleic acid-binding, OB-fold-like	nuclease-sensitive element-binding protein 1 [Mus musculus]	3	12	0	2.51154e+07	0	1.45681e+07	0	7	0	5	2.51154e+07	0	1.45681e+07
13386064	YEATS4	GeneID:8089	Mus musculus	YEATS	YEATS domain-containing protein 4 [Mus musculus]	1	1	0	0	4.03846e+06	0	0	0	1	0	0	4.03846e+06	0
31982421	YY1	GeneID:7528	Mus musculus	Zinc finger, C2H2-type|Zinc finger, C2H2-type/integrase, DNA-binding|Zinc finger, C2H2-like|Transcription factor yin/yang	transcriptional repressor protein YY1 [Mus musculus]	4	4	0	0	1.05941e+07	0	0	0	4	0	0	1.05941e+07	0
257196203	ZBTB20	GeneID:26137	Mus musculus	BTB/POZ-like|Zinc finger, C2H2-type|BTB/POZ fold|BTB/POZ|Zinc finger, C2H2-type/integrase, DNA-binding|Zinc finger, C2H2-like	zinc finger and BTB domain-containing protein 20 isoform S [Mus musculus]	13	48	0	3.75454e+07	6.23297e+06	4.99769e+07	0	17	9	22	3.75454e+07	6.23297e+06	4.99769e+07
117606328	ZBTB44	GeneID:29068	Mus musculus	BTB/POZ-like|Zinc finger, C2H2-type|BTB/POZ fold|BTB/POZ|Zinc finger, C2H2-type/integrase, DNA-binding|Zinc finger, C2H2-like	zinc finger and BTB domain-containing protein 44 isoform b [Mus musculus]	4	5	0	2.01453e+06	2.26036e+06	0	0	1	4	0	2.01453e+06	2.26036e+06	0
117647238	ZBTB7A	GeneID:51341	Mus musculus	BTB/POZ-like|Zinc finger, C2H2-type|BTB/POZ fold|BTB/POZ|Zinc finger, C2H2-type/integrase, DNA-binding|Zinc finger, C2H2-like	zinc finger and BTB domain-containing protein 7A [Mus musculus]	2	2	0	0	1.93935e+06	0	0	0	2	0	0	1.93935e+06	0
110225364	ZFHX3	GeneID:463	Mus musculus	Homeobox, conserved site|Homeobox|Zinc finger, U1-type|Zinc finger, C2H2-type|Homeodomain-like|Homeodomain-related|Zinc finger, C2H2-type/integrase, DNA-binding|Zinc finger, C2H2-like	zinc finger homeobox protein 3 [Mus musculus]	8	18	0	2.5665e+06	471557	1.06109e+07	0	3	1	14	2.5665e+06	471557	1.06109e+07
125656178	ZFHX4	GeneID:79776	Mus musculus	Homeobox, conserved site|Homeobox|Zinc finger, U1-type|Zinc finger, C2H2-type|Homeodomain-like|Homeodomain-related|Zinc finger, C2H2-type/integrase, DNA-binding|Zinc finger, C2H2-like	zinc finger homeobox protein 4 [Mus musculus]	1	9	0	2.5665e+06	0	9.28442e+06	0	4	0	5	2.5665e+06	0	9.28442e+06
6756049	ZFP148	GeneID:7707	Mus musculus	Zinc finger, C2H2-type|Zinc finger, C2H2-type/integrase, DNA-binding|Zinc finger, C2H2-like	zinc finger protein 148 [Mus musculus]	11	19	0	8.99612e+06	2.6377e+06	1.10863e+07	0	8	2	9	8.99612e+06	2.6377e+06	1.10863e+07
126352391	ZFP384	GeneID:171017	Mus musculus	Zinc finger, C2H2-type|Zinc finger, C2H2-type/integrase, DNA-binding|Zinc finger, C2H2-like	zinc finger protein 384 isoform 1 [Mus musculus]	5	8	0	0	4.83534e+06	1.87774e+06	0	0	7	1	0	4.83534e+06	1.87774e+06
254553392	ZFP512	GeneID:84450	Mus musculus	Zinc finger, C2H2-type|Zinc finger, C2H2-like	zinc finger protein 512 [Mus musculus]	4	5	0	0	6.20091e+06	0	0	0	5	0	0	6.20091e+06	0
254553274	ZFP746	GeneID:155061	Mus musculus	Krueppel-associated box|Zinc finger, C2H2-type|Zinc finger, C2H2-type/integrase, DNA-binding|Zinc finger, C2H2-like|Protein of unknown function DUF3669, zinc finger protein	zinc finger protein 746 [Mus musculus]	2	6	0	0	0	0	6	0	0	0	0	0	0
40789094	ZHX2	GeneID:22882	Mus musculus	Homeobox|Zinc finger, C2H2-type|Homeodomain-like|Homeodomain-related|Zinc finger, C2H2-like	zinc fingers and homeoboxes protein 2 [Mus musculus]	10	17	0	1.24266e+07	1.13877e+07	1.19054e+07	0	11	2	4	1.24266e+07	1.13877e+07	1.19054e+07
40254321	ZHX3	GeneID:23051	Mus musculus	Homeobox|Homeodomain-like|Homeodomain-related|Zinc finger, C2H2-like	zinc fingers and homeoboxes protein 3 [Mus musculus]	2	3	0	2.66081e+06	0	1.85625e+06	0	1	0	2	2.66081e+06	0	1.85625e+06
150010617	ZKSCAN16	GeneID:158399	Mus musculus	Krueppel-associated box|Transcription regulator SCAN|Zinc finger, C2H2-type|Zinc finger, C2H2-type/integrase, DNA-binding|Zinc finger, C2H2-like	zinc finger protein 483 [Mus musculus]	1	2	0	0	1.94242e+06	2.25454e+06	0	0	1	1	0	1.94242e+06	2.25454e+06
257196177	ZNF512B	GeneID:57473	Mus musculus	Zinc finger, C2H2-type|Zinc finger, C2H2-like	zinc finger protein 512B [Mus musculus]	1	1	0	0	0	3.28329e+06	0	0	0	1	0	0	3.28329e+06

## Sheet: Pck1p #2 total
Accession	Gene	NOT_in_TF_list		Description	Σ# Unique Peptides	Σ# Peptides	Σ# PSMs	NC	V	D/C	D/C/I	NC	V	D/C	D/C/I
6678878	MGMT	NOT_in_TF_list		methylated-DNA--protein-cysteine methyltransferase [Mus musculus]	86	107	8	1.32396e+07	0	2.9774e+06	0	7	0	1	0
6678349	TIAL1	NOT_in_TF_list		nucleolysin TIAR [Mus musculus]	83	88	12	4.27425e+07	0	0	0	11	1	0	0
13385326	3110001D03RIK	NOT_in_TF_list		transmembrane protein C9orf123 homolog [Mus musculus]	47	55	1	0	0	0	0	0	0	0	1
13385926	TPBPB	NOT_in_TF_list		trophoblast specific protein beta precursor [Mus musculus]	28	28	1	0	0	0	0	0	1	0	0
309265053	LOC100504912	NOT_in_TF_list		PREDICTED: up-regulated during skeletal muscle growth protein 5-like [Mus musculus]	1	36	1	0	0	2.05953e+06	0	0	0	1	0
19527156	NAA38	NOT_in_TF_list		N-alpha-acetyltransferase 38, NatC auxiliary subunit [Mus musculus]	1	36	1	1.51614e+06	0	0	0	1	0	0	0
13385426	HIGD2A	NOT_in_TF_list		HIG1 domain family member 2A [Mus musculus]	68	68	1	4.35492e+07	0	0	0	1	0	0	0
34732721	IFI27L1	NOT_in_TF_list		interferon, alpha-inducible protein 27 like 1 isoform 4 [Mus musculus]	54	54	2	1.86831e+06	0	0	0	1	0	1	0
312283657	6720489N17RIK	NOT_in_TF_list		uncharacterized protein LOC211378 [Mus musculus]	110	112	2	0	0	0	0	0	2	0	0
407263191	MisMatch	NOT_in_TF_list		PREDICTED: uncharacterized protein LOC77870 [Mus musculus]	6	35	1	0	0	0	0	0	0	0	1
444741695	MisMatch	NOT_in_TF_list		enhancer of polycomb homolog 1 isoform 3 [Mus musculus]	0	33	1	0	0	1.36947e+06	0	0	0	1	0
6677785	RPL37A	NOT_in_TF_list		60S ribosomal protein L37a [Mus musculus]	16	16	2	5.70293e+06	0	2.71918e+06	0	1	0	1	0
407261476	MisMatch	NOT_in_TF_list		PREDICTED: cytochrome P450 2A5 [Mus musculus]	11	15	13	5.70713e+06	0	6.88544e+06	5.17026e+06	1	0	5	7
33468943	TIMM17A	NOT_in_TF_list		mitochondrial import inner membrane translocase subunit Tim17-A [Mus musculus]	8	8	2	7203790	0	0	0	1	1	0	0
390608674	MisMatch	NOT_in_TF_list		c-C motif chemokine 27-like isoform 1 [Mus musculus]	59	60	2	0	0	3.19102e+08	94264115	0	0	1	1
82898755	LOC638399	NOT_in_TF_list		PREDICTED: 60S ribosomal protein L31-like isoform 1 [Mus musculus]	55	55	2	3.31149e+06	0	0	0	2	0	0	0
124487321	WDR76	NOT_in_TF_list		WD repeat-containing protein 76 [Mus musculus]	0	31	12	1.3736e+07	0	0	1.45658e+06	10	0	1	1
409168313	MisMatch	NOT_in_TF_list		uncharacterized protein LOC73410 [Mus musculus]	17	17	1	0	0	0	0	1	0	0	0
46195448	IFNA14	NOT_in_TF_list		interferon, alpha 14 precursor [Mus musculus]	9	31	1	0	0	0	0	0	1	0	0
30794474	MRPS7	NOT_in_TF_list		28S ribosomal protein S7, mitochondrial precursor [Mus musculus]	168	195	7	3.25203e+06	0	7.61204e+06	6.07864e+06	1	1	4	1
6679034	NEDD8	NOT_in_TF_list		NEDD8 precursor [Mus musculus]	25	25	2	0	0	1.63361e+06	0	0	1	1	0
11612509	RALB	NOT_in_TF_list		ras-related protein Ral-B precursor [Mus musculus]	31	31	4	744869	0	1.09722e+06	0	2	1	1	0
257196209	RPP30	NOT_in_TF_list		ribonuclease P protein subunit p30 [Mus musculus]	28	37	2	0	0	6.70835e+06	0	0	0	2	0
257096061	PQLC1	NOT_in_TF_list		PQ-loop repeat-containing protein 1 isoform c [Mus musculus]	0	30	1	0	0	0	0	0	0	0	1
228008337	PSMC3	NOT_in_TF_list		26S protease regulatory subunit 6A [Mus musculus]	14	14	6	3.44312e+06	0	5.43851e+06	4.92098e+06	1	0	3	2
36031035	SMC3	NOT_in_TF_list		structural maintenance of chromosomes protein 3 [Mus musculus]	32	32	24	981880	0	7.13984e+06	9.0587e+06	3	0	14	7
227908769	NTHL1	NOT_in_TF_list		endonuclease III-like protein 1 [Mus musculus]	18	18	4	5.26818e+06	0	3.66893e+06	0	2	0	2	0
22748609	RGS9BP	NOT_in_TF_list		regulator of G-protein signaling 9-binding protein [Mus musculus]	19	19	1	0	0	0	3.43087e+07	0	0	0	1
295054166	MRPL15	NOT_in_TF_list		39S ribosomal protein L15, mitochondrial isoform 1 precursor [Mus musculus]	9	13	3	0	0	3.63859e+06	0	0	1	2	0
13385044	RPL35	NOT_in_TF_list		60S ribosomal protein L35 [Mus musculus]	32	50	4	1.67178e+07	0	0	0	4	0	0	0
163838662	TSPO	NOT_in_TF_list		translocator protein [Mus musculus]	12	12	1	0	0	0	3.60736e+08	0	0	0	1
357527442	MisMatch	NOT_in_TF_list		cip1-interacting zinc finger protein isoform 4 [Mus musculus]	69	72	12	1.984e+07	0	0	0	12	0	0	0
148271093	PDCD7	NOT_in_TF_list		programmed cell death protein 7 [Mus musculus]	23	23	6	6.33181e+06	0	0	0	6	0	0	0
7106343	LTA	NOT_in_TF_list		lymphotoxin-alpha precursor [Mus musculus]	7	14	1	0	0	0	0	1	0	0	0
7305581	TIMM13	NOT_in_TF_list		mitochondrial import inner membrane translocase subunit Tim13 [Mus musculus]	17	22	1	0	0	0	0	0	0	1	0
363543337	MisMatch	NOT_in_TF_list		enoyl-CoA hydratase domain-containing protein 2, mitochondrial isoform 2 [Mus musculus]	11	28	2	5.01047e+06	0	1.48673e+06	0	1	0	1	0
459683847	MisMatch	NOT_in_TF_list		60S ribosomal protein L22 isoform c [Mus musculus]	51	53	1	0	0	3.14082e+06	0	0	0	1	0
170172562	SERPINE1	NOT_in_TF_list		plasminogen activator inhibitor 1 precursor [Mus musculus]	48	48	9	0	0	6.21189e+06	5.38309e+06	0	0	5	4
84662758	RNPC3	NOT_in_TF_list		RNA-binding protein 40 [Mus musculus]	0	28	6	9.18982e+06	0	0	0	6	0	0	0
261824000	PSMA3	NOT_in_TF_list		proteasome subunit alpha type-3 [Mus musculus]	36	44	4	0	0	4.84132e+06	0	1	0	3	0
226958438	QK	NOT_in_TF_list		protein quaking isoform 2 [Mus musculus]	31	36	3	0	0	9.22893e+06	955831	0	0	2	1
188035915	ALDH7A1	NOT_in_TF_list		alpha-aminoadipic semialdehyde dehydrogenase isoform b [Mus musculus]	2	29	13	4421393	0	1.11389e+07	5.38985e+06	1	2	6	4
31377830	CLDN17	NOT_in_TF_list		claudin-17 [Mus musculus]	22	22	3	0	0	0	0	0	0	0	3
289191399	SPHK2	NOT_in_TF_list		sphingosine kinase 2 [Mus musculus]	33	33	7	0	0	6.13698e+06	4.39762e+06	0	0	2	5
10181184	ATP5J2	NOT_in_TF_list		ATP synthase subunit f, mitochondrial [Mus musculus]	4	28	1	2.74697e+06	0	0	0	1	0	0	0
27369569	SMNDC1	NOT_in_TF_list		survival of motor neuron-related-splicing factor 30 [Mus musculus]	87	90	2	3.23032e+06	0	0	0	2	0	0	0
6754036	GOT2	NOT_in_TF_list		aspartate aminotransferase, mitochondrial [Mus musculus]	4	23	7	1.94662e+06	0	2.16141e+06	0	4	0	1	2
6755034	PEX11A	NOT_in_TF_list		peroxisomal membrane protein 11A [Mus musculus]	1	24	2	0	0	2.01132e+06	0	0	0	2	0
6679803	FKBP1A	NOT_in_TF_list		peptidyl-prolyl cis-trans isomerase FKBP1A [Mus musculus]	1	24	2	1.71119e+06	0	0	1.58718e+06	1	0	0	1
7110705	PTMA	NOT_in_TF_list		prothymosin alpha [Mus musculus]	1	24	1	0	0	0	0	1	0	0	0
364502999	MisMatch	NOT_in_TF_list		keratin-associated protein 5-2 [Mus musculus]	30	30	1	0	0	4.69666e+07	0	0	0	1	0
242397474	AEN	NOT_in_TF_list		apoptosis-enhancing nuclease isoform 2 [Mus musculus]	20	26	1	1.36704e+06	0	0	0	1	0	0	0
46593021	UQCRC1	NOT_in_TF_list		cytochrome b-c1 complex subunit 1, mitochondrial precursor [Mus musculus]	75	76	12	1.80265e+07	0	1.94578e+07	2.57417e+07	3	0	4	5
21426893	HIST1H1B	NOT_in_TF_list		histone H1.5 [Mus musculus]	20	20	6	6.84352e+07	0	1.60206e+07	6.47086e+06	3	0	2	1
31980806	PGRMC1	NOT_in_TF_list		membrane-associated progesterone receptor component 1 [Mus musculus]	34	42	3	0	0	1.09941e+07	0	0	0	3	0
58037115	0610011F06RIK	NOT_in_TF_list		UPF0585 protein C16orf13 homolog [Mus musculus]	19	19	1	0	0	1.07093e+07	0	0	0	1	0
160333195	ECI2	NOT_in_TF_list		enoyl-CoA delta isomerase 2, mitochondrial isoform b [Mus musculus]	27	45	5	5.01252e+06	0	5.62918e+06	2.65453e+06	1	0	2	2
112293271	LOR	NOT_in_TF_list		loricrin [Mus musculus]	2	17	1	367788	0	0	0	1	0	0	0
33468919	OLFR56	NOT_in_TF_list		olfactory receptor 56 [Mus musculus]	37	37	1	0	0	0	0	0	0	1	0
46518499	TAF10	NOT_in_TF_list		transcription initiation factor TFIID subunit 10 [Mus musculus]	19	19	2	0	0	4.56858e+06	0	1	0	1	0
153945724	NPTN	NOT_in_TF_list		neuroplastin precursor [Mus musculus]	24	24	1	0	0	2.96647e+06	0	0	0	1	0
247300942	PSMB10	NOT_in_TF_list		proteasome subunit beta type-10 precursor [Mus musculus]	35	35	3	1.42544e+06	0	2.63362e+06	0	1	0	2	0
27805389	GPT2	NOT_in_TF_list		alanine aminotransferase 2 [Mus musculus]	15	15	11	3.26009e+06	0	7.77469e+06	6.41174e+06	1	0	5	5
6678387	TNFSF8	NOT_in_TF_list		tumor necrosis factor ligand superfamily member 8 [Mus musculus]	104	129	6	0	0	0	3.27047e+06	0	0	0	6
327180734	DNMT1	NOT_in_TF_list		DNA (cytosine-5)-methyltransferase 1 isoform 2 [Mus musculus]	20	20	20	379130	0	6.09631e+06	5.21386e+06	1	0	7	12
85702201	TMEM136	NOT_in_TF_list		transmembrane protein 136 [Mus musculus]	15	27	1	0	0	0	0	0	1	0	0
45331202	HYAL2	NOT_in_TF_list		hyaluronidase-2 precursor [Mus musculus]	10	41	2	0	0	5.82373e+06	0	0	0	2	0
10946740	PDCD1LG2	NOT_in_TF_list		programmed cell death 1 ligand 2 precursor [Mus musculus]	33	33	1	0	0	0	8.27854e+06	0	0	0	1
255069752	FPR-RS4	NOT_in_TF_list		formyl peptide receptor-related sequence 4 [Mus musculus]	51	52	1	0	0	0	0	1	0	0	0
21450291	ALDOB	NOT_in_TF_list		fructose-bisphosphate aldolase B [Mus musculus]	30	30	6	0	0	7.15691e+06	1.95344e+06	1	0	3	2
148839318	SMCHD1	NOT_in_TF_list		structural maintenance of chromosomes flexible hinge domain-containing protein 1 [Mus musculus]	65	67	20	1.35213e+07	0	4.5437e+06	2.29142e+06	1	0	13	6
227499995	MTFMT	NOT_in_TF_list		methionyl-tRNA formyltransferase, mitochondrial [Mus musculus]	7	7	1	0	0	96451778	0	0	0	1	0
254039694	CDC42EP4	NOT_in_TF_list		cdc42 effector protein 4 [Mus musculus]	20	20	7	2.35715e+06	0	1.73748e+06	0	2	1	3	1
124244100	ADCK4	NOT_in_TF_list		uncharacterized aarF domain-containing protein kinase 4 [Mus musculus]	1	15	4	343074	0	5.27282e+06	2.4869e+06	1	0	2	1
309268661	GM5890	NOT_in_TF_list		PREDICTED: serine/threonine-protein kinase MARK2-like isoform 1 [Mus musculus]	24	24	4	0	0	9.11441e+09	6.04992e+08	1	0	2	1
31044423	ALKBH5	NOT_in_TF_list		RNA demethylase ALKBH5 [Mus musculus]	8	8	2	0	0	2.26096e+06	6.7622e+06	0	0	1	1
28076937	OBFC2B	NOT_in_TF_list		SOSS complex subunit B1 [Mus musculus]	35	35	1	234360	0	0	0	1	0	0	0
240120054	AKR7A5	NOT_in_TF_list		aflatoxin B1 aldehyde reductase member 2 [Mus musculus]	8	39	5	0	0	2.46588e+06	4.70595e+06	0	0	4	1
6755204	PSMB5	NOT_in_TF_list		proteasome subunit beta type-5 [Mus musculus]	106	107	3	3.36926e+06	0	805616	0	2	0	1	0
257096000	DPYS	NOT_in_TF_list		dihydropyrimidinase [Mus musculus]	34	35	5	4.01058e+06	0	5.22323e+06	645671	3	0	1	1
238231384	PSMB6	NOT_in_TF_list		proteasome subunit beta type-6 precursor [Mus musculus]	25	25	1	0	0	0	6.14168e+07	0	0	0	1
33468885	CACYBP	NOT_in_TF_list		calcyclin-binding protein [Mus musculus]	13	15	1	0	0	1.89679e+06	0	0	0	1	0
160358821	AMY1	NOT_in_TF_list		alpha-amylase 1 precursor [Mus musculus]	26	26	6	0	0	0	7.80865e+06	0	0	0	6
27229131	DHDH	NOT_in_TF_list		trans-1,2-dihydrobenzene-1,2-diol dehydrogenase [Mus musculus]	16	16	3	1.38501e+06	0	4.50153e+06	0	1	0	2	0
257096024	ACNAT1	NOT_in_TF_list		acyl-coenzyme A amino acid N-acyltransferase 1 [Mus musculus]	14	14	5	5.2403e+06	0	0	826526	2	0	1	2
28893421	XPNPEP3	NOT_in_TF_list		probable Xaa-Pro aminopeptidase 3 [Mus musculus]	26	26	4	0	0	1.12264e+07	0	0	0	4	0
30520379	D19ERTD737E	NOT_in_TF_list		protein FAM204A [Mus musculus]	10	21	1	0	0	0	0	0	0	0	1
100815493	WAPAL	NOT_in_TF_list		wings apart-like protein homolog [Mus musculus]	40	41	13	4.40811e+06	0	4.84819e+06	2.93789e+06	2	1	6	4
89242143	ARHGAP12	NOT_in_TF_list		rho GTPase-activating protein 12 isoform 1 [Mus musculus]	40	40	7	0	0	1.09444e+06	623969	0	2	2	3
34368584	ZC3H15	NOT_in_TF_list		zinc finger CCCH domain-containing protein 15 [Mus musculus]	54	55	5	1.71751e+06	0	2.73733e+06	2.51544e+06	2	0	2	1
12963583	PGPEP1	NOT_in_TF_list		pyroglutamyl-peptidase 1 [Mus musculus]	58	58	1	0	0	4.41211e+06	0	0	0	1	0
169790909	MRPS9	NOT_in_TF_list		28S ribosomal protein S9, mitochondrial precursor [Mus musculus]	54	54	4	0	0	2.75928e+06	0	0	0	3	1
318843692	LOC100504473	NOT_in_TF_list		RNA-binding protein Musashi homolog 2 isoform 2 [Mus musculus]	13	15	1	0	0	0	0	0	1	0	0
113461996	6330578E17RIK	NOT_in_TF_list		cytochrome c oxidase assembly factor 5 [Mus musculus]	24	24	1	0	0	4.19242e+06	0	0	0	1	0
9507153	STK19	NOT_in_TF_list		serine/threonine-protein kinase 19 [Mus musculus]	19	30	2	385128	0	0	0	1	0	1	0
9845295	RPL36A	NOT_in_TF_list		60S ribosomal protein L36a [Mus musculus]	22	23	1	0	0	645497	0	0	0	1	0
33563246	CAST	NOT_in_TF_list		calpastatin [Mus musculus]	36	37	3	0	0	0	1.46976e+06	0	0	0	3
50980303	MRPS27	NOT_in_TF_list		28S ribosomal protein S27, mitochondrial [Mus musculus]	30	30	6	1.16637e+06	0	6.09473e+06	3.15111e+06	1	3	1	1
149257848	LOC100044391	NOT_in_TF_list		PREDICTED: non-histone chromosomal protein HMG-14-like [Mus musculus]	19	19	1	0	0	776511	0	0	0	1	0
18079341	EIF3H	NOT_in_TF_list		eukaryotic translation initiation factor 3 subunit H [Mus musculus]	2	20	3	161464	0	1.53858e+06	0	1	0	2	0
227116300	KPNA6	NOT_in_TF_list		importin subunit alpha-7 [Mus musculus]	13	15	5	1.04887e+06	0	9.70728e+06	2.27842e+06	1	0	3	1
256985205	DAP3	NOT_in_TF_list		28S ribosomal protein S29, mitochondrial isoform 1 [Mus musculus]	8	21	3	0	0	4.11413e+06	347259	0	0	2	1
13385994	SNRPG	NOT_in_TF_list		small nuclear ribonucleoprotein G [Mus musculus]	16	16	1	0	0	4.06044e+06	0	0	0	1	0
182764439	HOXA10	GeneID:3206	Mus musculus	homeobox protein Hox-A10 isoform a [Mus musculus]	50	50	1	0	0	0	0	0	0	1	0
285026477	VMN1R68	NOT_in_TF_list		vomernasal 1 receptor Vmn1r68 [Mus musculus]	10	10	1	1.25092e+08	0	0	0	1	0	0	0
157057186	IL24	NOT_in_TF_list		interleukin-24 [Mus musculus]	39	39	1	0	0	17488257	0	0	0	1	0
21311849	GGCT	NOT_in_TF_list		gamma-glutamylcyclotransferase [Mus musculus]	4	23	1	2.15464e+06	0	0	0	1	0	0	0
21624627	SNRNP35	NOT_in_TF_list		U11/U12 small nuclear ribonucleoprotein 35 kDa protein [Mus musculus]	1	13	2	2.57154e+06	0	0	0	2	0	0	0
6679483	PROX1	GeneID:5629	Mus musculus	prospero homeobox protein 1 [Mus musculus]	10	18	8	869462	0	5.05211e+06	2.31976e+06	1	0	4	3
164663750	AMN1	NOT_in_TF_list		protein AMN1 homolog [Mus musculus]	38	38	2	0	0	0	0	0	0	0	2
21313138	GSTK1	NOT_in_TF_list		glutathione S-transferase kappa 1 [Mus musculus]	17	19	2	0	0	7.55377e+06	0	0	1	1	0
13385776	FIBIN	NOT_in_TF_list		fin bud initiation factor homolog precursor [Mus musculus]	15	16	1	0	0	0	3.96235e+06	0	0	0	1
108860695	CBX3	NOT_in_TF_list		chromobox protein homolog 3 [Mus musculus]	32	33	1	2.22417e+06	0	0	0	1	0	0	0
6679967	GCH1	NOT_in_TF_list		GTP cyclohydrolase 1 precursor [Mus musculus]	7	7	3	900107	0	972144	0	2	0	1	0
8393343	FABP1	NOT_in_TF_list		fatty acid-binding protein, liver [Mus musculus]	29	29	1	0	0	3595056	0	0	0	1	0
124487127	EXOSC7	NOT_in_TF_list		exosome complex exonuclease RRP42 [Mus musculus]	13	13	2	5.85724e+06	0	6.7014e+06	0	1	0	1	0
46852276	DHX29	NOT_in_TF_list		ATP-dependent RNA helicase Dhx29 [Mus musculus]	39	39	13	1.5738e+06	0	4.97371e+06	2.76809e+06	3	0	6	4
213512857	NSL1	NOT_in_TF_list		kinetochore-associated protein NSL1 homolog [Mus musculus]	19	19	1	0	0	5.9725e+07	0	0	0	1	0
9506457	TMEM37	NOT_in_TF_list		voltage-dependent calcium channel gamma-like subunit [Mus musculus]	25	25	1	3.23953e+06	0	0	0	1	0	0	0
13385896	RAB32	NOT_in_TF_list		ras-related protein Rab-32 [Mus musculus]	27	27	1	219657	0	0	0	1	0	0	0
13385388	MED28	NOT_in_TF_list		mediator of RNA polymerase II transcription subunit 28 [Mus musculus]	6	19	1	0	0	1727552315	0	0	0	1	0
12963729	INO80B	NOT_in_TF_list		INO80 complex subunit B [Mus musculus]	16	16	1	0	0	0	4.2095e+07	0	0	0	1
22128753	OLFR638	NOT_in_TF_list		olfactory receptor 638 [Mus musculus]	17	18	1	1.58747e+08	0	0	0	1	0	0	0
27734174	FITM2	NOT_in_TF_list		fat storage-inducing transmembrane protein 2 [Mus musculus]	22	22	2	0	0	0	3.08141e+06	0	0	0	2
22129713	OLFR981	NOT_in_TF_list		olfactory receptor 981 [Mus musculus]	10	30	1	0	0	6.39682e+06	0	0	0	1	0
299890779	DDX19B	NOT_in_TF_list		ATP-dependent RNA helicase DDX19B isoform 3 [Mus musculus]	12	12	2	0	0	0	3.50961e+06	0	0	0	2
157951706	HYOU1	NOT_in_TF_list		hypoxia up-regulated protein 1 precursor [Mus musculus]	33	33	8	738577	0	3.69293e+06	2.84249e+06	2	0	5	1
27754065	PPA1	NOT_in_TF_list		inorganic pyrophosphatase [Mus musculus]	7	8	2	746403	0	3.5318e+06	0	1	0	1	0
31981562	PKM2	NOT_in_TF_list		pyruvate kinase, muscle isoform M2 [Mus musculus]	37	37	4	1.62094e+06	0	0	4.28025e+06	1	1	1	1
197333728	ISOC2A	NOT_in_TF_list		isochorismatase domain-containing protein 2A, mitochondrial precursor [Mus musculus]	9	9	1	0	0	3.03806e+06	0	0	0	1	0
84662727	FN3K	NOT_in_TF_list		fructosamine-3-kinase isoform b [Mus musculus]	15	24	1	0	0	5.13086e+06	0	0	0	1	0
111160869	TRA2A	NOT_in_TF_list		transformer-2 protein homolog alpha [Mus musculus]	18	18	2	0	0	5.54159e+06	0	0	0	2	0
160948612	CYP2D9	NOT_in_TF_list		cytochrome P450 2D9 [Mus musculus]	16	16	6	5.27638e+06	0	7.26841e+06	4.68464e+06	3	0	2	1
157058298	GM10334	NOT_in_TF_list		mesotrypsin-like precursor [Mus musculus]	26	26	1	0	0	74421731	0	0	0	1	0
21313438	EXOC2	NOT_in_TF_list		exocyst complex component 2 [Mus musculus]	16	16	9	1.83051e+06	0	6.3856e+06	2242172	3	1	3	2
12963793	1810009J06RIK	NOT_in_TF_list		RIKEN cDNA 1810009J06 precursor [Mus musculus]	35	38	1	0	0	0	0	1	0	0	0
34328400	SRSF1	NOT_in_TF_list		serine/arginine-rich splicing factor 1 isoform 1 [Mus musculus]	25	26	2	4.30074e+06	0	1.74681e+06	0	1	0	1	0
55926215	DUSP23	NOT_in_TF_list		dual specificity protein phosphatase 23 [Mus musculus]	1	37	1	484067	0	0	0	1	0	0	0
11037792	NEK7	NOT_in_TF_list		serine/threonine-protein kinase Nek7 [Mus musculus]	11	23	3	4.2641e+06	0	4.64866e+06	0	1	0	2	0
13385598	SNRPD3	NOT_in_TF_list		small nuclear ribonucleoprotein Sm D3 [Mus musculus]	9	14	1	0	0	4.46181e+06	0	0	0	1	0
13385976	MRPL19	NOT_in_TF_list		39S ribosomal protein L19, mitochondrial [Mus musculus]	14	14	2	0	0	3.06354e+06	0	0	0	2	0
213688406	DYNLL1	NOT_in_TF_list		dynein light chain 1, cytoplasmic [Mus musculus]	8	8	1	0	0	892687	0	0	0	1	0
6679553	PTPN2	NOT_in_TF_list		tyrosine-protein phosphatase non-receptor type 2 isoform a [Mus musculus]	5	5	2	0	0	2.39577e+06	0	0	0	2	0
84579909	MAPK1	NOT_in_TF_list		mitogen-activated protein kinase 1 [Mus musculus]	30	30	3	1.49563e+06	0	4.75434e+06	0	1	0	2	0
78711832	AKAP2	NOT_in_TF_list		A-kinase anchor protein 2 isoform 3 [Mus musculus]	8	9	6	4.9749e+06	0	3.27073e+06	0	4	0	2	0
21312151	CHMP2A	NOT_in_TF_list		charged multivesicular body protein 2a [Mus musculus]	3	107	3	0	0	2.33162e+06	773497	0	1	1	1
161016824	NFS1	NOT_in_TF_list		cysteine desulfurase, mitochondrial [Mus musculus]	1	20	4	3.94978e+06	0	7.56186e+06	5.23842e+06	1	0	2	1
22094097	GDAP2	NOT_in_TF_list		ganglioside-induced differentiation-associated protein 2 [Mus musculus]	2	48	1	0	0	7.38688e+07	0	0	0	1	0
254826728	NOSIP	NOT_in_TF_list		nitric oxide synthase-interacting protein isoform 2 [Mus musculus]	1	105	1	164564	0	0	0	1	0	0	0
6755442	SDC4	NOT_in_TF_list		syndecan-4 precursor [Mus musculus]	1	37	2	0	0	2.1884e+06	395964	0	0	1	1
114158701	NOP14	NOT_in_TF_list		nucleolar protein 14 [Mus musculus]	85	85	7	2.31656e+06	0	3.85234e+06	1.72571e+06	4	0	2	1
224922828	RBM42	NOT_in_TF_list		RNA-binding protein 42 [Mus musculus]	7	8	4	2.83636e+06	0	3.68142e+06	2.56096e+06	2	0	1	1
288541346	RBM41	NOT_in_TF_list		RNA-binding protein 41 isoform 3 [Mus musculus]	1	47	3	2.75197e+06	0	0	0	3	0	0	0
33859604	PSMC2	NOT_in_TF_list		26S protease regulatory subunit 7 [Mus musculus]	10	10	5	4.76816e+06	0	4.7948e+06	0	1	0	4	0
40789092	RRP12	NOT_in_TF_list		RRP12-like protein [Mus musculus]	24	24	10	4.18296e+06	0	2.12147e+06	0	7	0	2	1
159032064	SALL1	GeneID:6299	Mus musculus	sal-like protein 1 [Mus musculus]	35	35	10	0	0	4.59584e+06	1.64401e+06	0	0	6	4
149262068	LOC100045924	NOT_in_TF_list		PREDICTED: mitotic spindle assembly checkpoint protein MAD2A-like [Mus musculus]	31	31	2	0	0	7.60287e+06	0	0	0	2	0
61888900	THOC7	NOT_in_TF_list		THO complex subunit 7 homolog isoform 2 [Mus musculus]	25	25	1	0	0	3.26468e+06	0	0	0	1	0
162138915	CPT2	NOT_in_TF_list		carnitine O-palmitoyltransferase 2, mitochondrial precursor [Mus musculus]	10	11	4	0	0	2.51082e+06	1.51247e+06	0	0	3	1
47059206	RNF181	NOT_in_TF_list		E3 ubiquitin-protein ligase RNF181 [Mus musculus]	11	18	1	0	0	0	1.67931e+07	0	0	0	1
85701644	FAM82A2	NOT_in_TF_list		regulator of microtubule dynamics protein 3 [Mus musculus]	20	20	4	2.27579e+06	0	6.28427e+06	0	2	0	1	1
238018071	FOXK2	GeneID:3607	Mus musculus	forkhead box protein K2 [Mus musculus]	19	19	4	0	0	7.13523e+06	9307548	0	0	2	2
121582637	OLFR1014	NOT_in_TF_list		olfactory receptor 1014 [Mus musculus]	27	27	1	91287720	0	0	0	1	0	0	0
31982437	NSDHL	NOT_in_TF_list		sterol-4-alpha-carboxylate 3-dehydrogenase, decarboxylating [Mus musculus]	2	14	2	587574	0	0	0	1	0	1	0
76563952	REXO4	NOT_in_TF_list		RNA exonuclease 4 [Mus musculus]	15	15	2	0	0	5.01941e+06	0	0	0	2	0
89111939	EXOC1	NOT_in_TF_list		exocyst complex component 1 [Mus musculus]	6	6	7	0	0	5.03552e+06	1.88877e+06	0	0	4	3
12963697	FAHD1	NOT_in_TF_list		acylpyruvase FAHD1, mitochondrial [Mus musculus]	9	9	2	3.2317e+06	0	0	0	2	0	0	0
18700032	ANP32B	NOT_in_TF_list		acidic leucine-rich nuclear phosphoprotein 32 family member B [Mus musculus]	1	27	1	1.39434e+06	0	0	0	1	0	0	0
13384904	MRPS22	NOT_in_TF_list		28S ribosomal protein S22, mitochondrial [Mus musculus]	15	17	3	0	0	2072775	2.513e+06	1	0	1	1
285401645	1700001C19RIK	NOT_in_TF_list		uncharacterized protein LOC75462 isoform 2 [Mus musculus]	22	22	1	0	0	0	2.84127e+06	0	0	0	1
122939196	CLTA	NOT_in_TF_list		clathrin light chain A isoform d [Mus musculus]	29	29	3	0	0	4.14576e+06	3.56794e+06	0	0	2	1
285402909	VMN1R159	NOT_in_TF_list		vomeronasal 1 receptor 159 [Mus musculus]	15	15	1	0	0	0	0	0	0	1	0
229577222	EIF2D	NOT_in_TF_list		eukaryotic translation initiation factor 2D isoform 2 [Mus musculus]	11	11	2	0	0	1.75109e+06	6.94099e+06	0	0	1	1
254939663	SENP3	NOT_in_TF_list		sentrin-specific protease 3 [Mus musculus]	11	11	3	0	0	5.13495e+06	0	0	0	3	0
6755488	SGCG	NOT_in_TF_list		gamma-sarcoglycan [Mus musculus]	7	7	1	0	0	0	2.85558e+07	0	0	0	1
6680309	HSPE1	NOT_in_TF_list		10 kDa heat shock protein, mitochondrial [Mus musculus]	7	7	1	559640	0	0	0	1	0	0	0
124001562	VAMP5	NOT_in_TF_list		vesicle-associated membrane protein 5 [Mus musculus]	18	18	1	0	0	878239	0	0	0	1	0
31560112	MFSD3	NOT_in_TF_list		major facilitator superfamily domain-containing protein 3 [Mus musculus]	9	12	1	0	0	4.32283e+06	0	0	0	1	0
407261225	MisMatch	NOT_in_TF_list		PREDICTED: uncharacterized LOC101055647 [Mus musculus]	30	31	1	0	0	0	0	0	0	0	1
229608944	TOR1AIP1	NOT_in_TF_list		torsin-1A-interacting protein 1 isoform 2 [Mus musculus]	3	13	3	0	0	0	2.51574e+06	0	0	2	1
19526994	MEMO1	NOT_in_TF_list		protein MEMO1 [Mus musculus]	17	17	2	0	0	2.92342e+06	0	0	1	1	0
22128869	OLFR1416	NOT_in_TF_list		olfactory receptor 1416 [Mus musculus]	17	19	1	4.96372e+06	0	0	0	1	0	0	0
442535508	MisMatch	NOT_in_TF_list		fatty acid-binding protein, epidermal isoform 2 [Mus musculus]	20	20	1	4.10406e+06	0	0	0	1	0	0	0
110815867	HTRA3	NOT_in_TF_list		serine protease HTRA3 isoform b precursor [Mus musculus]	9	19	4	0	0	0	0	0	4	0	0
30519997	BLMH	NOT_in_TF_list		bleomycin hydrolase [Mus musculus]	13	14	3	5.00037e+06	0	0	0	3	0	0	0
31560052	TRP53RK	NOT_in_TF_list		TP53-regulating kinase [Mus musculus]	5	20	1	0	0	0	0	0	1	0	0
6753332	CD14	NOT_in_TF_list		monocyte differentiation antigen CD14 precursor [Mus musculus]	9	10	3	0	0	5.42595e+06	801040	1	0	1	1
164698506	VPS4B	NOT_in_TF_list		vacuolar protein sorting-associated protein 4B [Mus musculus]	18	18	2	445691	0	0	1.53751e+06	1	0	0	1
8394252	SEC61A1	NOT_in_TF_list		protein transport protein Sec61 subunit alpha isoform 1 [Mus musculus]	26	30	6	5.834e+06	0	1.29929e+07	0	3	0	3	0
407262682	MisMatch	NOT_in_TF_list		PREDICTED: nuclear elongation and deformation protein 1-like, partial [Mus musculus]	32	33	1	0	0	1.50213e+08	0	0	0	1	0
59676579	OLFR857	NOT_in_TF_list		olfactory receptor 857 [Mus musculus]	15	17	1	9.68859e+06	0	0	0	1	0	0	0
9055370	EIF3I	NOT_in_TF_list		eukaryotic translation initiation factor 3 subunit I [Mus musculus]	19	21	2	365504	0	1.92147e+06	0	1	0	1	0
218156282	SLC17A7	NOT_in_TF_list		vesicular glutamate transporter 1 [Mus musculus]	12	12	2	0	0	6.80958e+06	0	0	0	2	0
314122227	TXLNA	NOT_in_TF_list		alpha-taxilin [Mus musculus]	13	13	7	0	0	2.53054e+06	3.15417e+06	0	1	2	4
6753952	GBX2	GeneID:2637	Mus musculus	homeobox protein GBX-2 [Mus musculus]	3	40	1	0	0	4.25434e+07	0	0	0	1	0
189409145	CARM1	NOT_in_TF_list		histone-arginine methyltransferase CARM1 isoform 2 [Mus musculus]	24	37	1	0	0	0	0	1	0	0	0
21362307	ZFP622	NOT_in_TF_list		zinc finger protein 622 [Mus musculus]	1	27	2	0	0	0	3.59854e+06	0	0	0	2
71725343	MCAT	NOT_in_TF_list		malonyl-CoA-acyl carrier protein transacylase, mitochondrial [Mus musculus]	15	15	4	0	0	3.50166e+06	0	2	0	2	0
17298672	AFF4	NOT_in_TF_list		AF4/FMR2 family member 4 [Mus musculus]	5	11	8	0	0	2.0862e+06	1.33681e+06	0	0	4	4
22779893	CCDC137	NOT_in_TF_list		coiled-coil domain-containing protein 137 [Mus musculus]	17	20	1	0	0	1.55255e+06	0	0	0	1	0
40254346	PAQR8	NOT_in_TF_list		membrane progestin receptor beta [Mus musculus]	14	15	1	0	0	0	1.10266e+09	0	0	0	1
227116358	MECR	NOT_in_TF_list		trans-2-enoyl-CoA reductase, mitochondrial precursor [Mus musculus]	21	21	1	0	0	0	0	0	1	0	0
28461141	TAF7	NOT_in_TF_list		transcription initiation factor TFIID subunit 7 isoform 1 [Mus musculus]	17	21	2	0	0	5.16291e+06	2.59683e+06	0	0	1	1
22128627	SORD	NOT_in_TF_list		sorbitol dehydrogenase [Mus musculus]	14	14	2	1.00889e+06	0	0	0	2	0	0	0
188528646	MTG1	NOT_in_TF_list		mitochondrial GTPase 1 [Mus musculus]	19	19	1	0	0	299294	0	0	0	1	0
171543881	SGCZ	NOT_in_TF_list		zeta-sarcoglycan [Mus musculus]	23	36	1	2.50169e+07	0	0	0	1	0	0	0
113930708	MUP5	NOT_in_TF_list		major urinary protein 5 precursor [Mus musculus]	12	12	1	0	0	2.26344e+06	0	0	0	1	0
194440687	SRRM1	NOT_in_TF_list		serine/arginine repetitive matrix protein 1 isoform 2 [Mus musculus]	25	25	5	264364	0	2.79767e+06	3.10111e+06	1	0	3	1
309269659	GM9182	NOT_in_TF_list		PREDICTED: UPF0711 protein C18orf21 homolog, partial [Mus musculus]	10	10	1	0	0	1.44576e+06	0	0	0	1	0
407262833	MisMatch	NOT_in_TF_list		PREDICTED: d-2-hydroxyglutarate dehydrogenase, mitochondrial-like [Mus musculus]	65	65	1	0	0	0	0	0	0	1	0
21311839	TOE1	NOT_in_TF_list		target of EGR1 protein 1 [Mus musculus]	20	20	3	0	0	1.51066e+06	0	0	0	3	0
6671766	CLK4	NOT_in_TF_list		dual specificity protein kinase CLK4 [Mus musculus]	15	15	2	0	0	3.08702e+06	0	0	0	2	0
114145487	RRAGC	NOT_in_TF_list		ras-related GTP-binding protein C [Mus musculus]	11	11	2	0	0	2.05884e+06	0	0	0	2	0
30519953	1810026J23RIK	NOT_in_TF_list		uncharacterized protein C19orf52 homolog [Mus musculus]	11	13	1	1.15856e+06	0	0	0	1	0	0	0
268607558	ZFP568	NOT_in_TF_list		zinc finger protein 568 isoform 2 [Mus musculus]	48	48	6	0	0	3.34998e+06	1.29392e+06	0	0	3	3
6754152	HAL	NOT_in_TF_list		histidine ammonia-lyase [Mus musculus]	2	39	5	2.13168e+06	0	1.0873e+06	1.83949e+06	2	0	1	2
71067104	SNRNP48	NOT_in_TF_list		U11/U12 small nuclear ribonucleoprotein 48 kDa protein [Mus musculus]	21	21	2	5.94067e+06	0	0	0	2	0	0	0
205360918	IGTP	NOT_in_TF_list		interferon gamma induced GTPase [Mus musculus]	15	15	2	0	0	1.59634e+06	707605	0	0	1	1
21313396	MMAB	NOT_in_TF_list		cob(I)yrinic acid a,c-diamide adenosyltransferase, mitochondrial precursor [Mus musculus]	1	81	1	0	0	2.13551e+06	0	0	0	1	0
74136557	ARID5B	GeneID:84159	Mus musculus	AT-rich interactive domain-containing protein 5B [Mus musculus]	73	74	8	0	0	8.4049e+06	0	0	0	8	0
251823855	VNN1	NOT_in_TF_list		pantetheinase precursor [Mus musculus]	13	13	3	0	0	1.96153e+06	1.6571e+06	0	0	2	1
31044487	B230219D22RIK	NOT_in_TF_list		UPF0461 protein C5orf24 homolog [Mus musculus]	17	19	1	0	0	0	0	0	1	0	0
13385500	TOMM34	NOT_in_TF_list		mitochondrial import receptor subunit TOM34 [Mus musculus]	21	29	1	767298	0	0	0	1	0	0	0
156151435	ACP5	NOT_in_TF_list		tartrate-resistant acid phosphatase type 5 precursor [Mus musculus]	10	14	1	0	0	1.92689e+06	0	0	0	1	0
13386354	RND3	NOT_in_TF_list		rho-related GTP-binding protein RhoE precursor [Mus musculus]	9	9	1	528340	0	0	0	1	0	0	0
46395466	TES	NOT_in_TF_list		testin [Mus musculus]	12	12	4	2.78145e+06	0	5.14663e+06	2.39716e+06	1	0	2	1
9790077	GSK3B	NOT_in_TF_list		glycogen synthase kinase-3 beta [Mus musculus]	21	21	1	0	0	2.03925e+06	0	0	0	1	0
157951600	TMEM18	NOT_in_TF_list		transmembrane protein 18 [Mus musculus]	9	12	1	0	0	6.64934e+07	0	0	0	1	0
6754354	INHBC	NOT_in_TF_list		inhibin beta C chain precursor [Mus musculus]	12	12	1	0	0	0	0	0	1	0	0
160333237	GPRC5C	NOT_in_TF_list		G-protein coupled receptor family C group 5 member C isoform b precursor [Mus musculus]	26	26	2	451018	0	6.05678e+06	0	1	0	1	0
13385318	KDELR2	NOT_in_TF_list		ER lumen protein retaining receptor 2 [Mus musculus]	9	9	1	0	0	5.23235e+07	0	0	0	1	0
270483872	CDADC1	NOT_in_TF_list		cytidine and dCMP deaminase domain-containing protein 1 isoform 5 [Mus musculus]	10	10	3	0	0	0	3.52529e+06	0	1	1	1
209977092	RTKN	NOT_in_TF_list		rhotekin isoform b [Mus musculus]	19	19	2	536908	0	0	0	1	1	0	0
162417980	AA986860	NOT_in_TF_list		specifically androgen-regulated gene protein [Mus musculus]	9	9	2	0	0	1.10691e+07	0	0	0	2	0
19527240	TBC1D10A	NOT_in_TF_list		TBC1 domain family member 10A [Mus musculus]	22	22	3	0	0	5.22068e+06	1.1578e+06	0	0	1	2
74315988	PFKFB1	NOT_in_TF_list		6-phosphofructo-2-kinase/fructose-2,6-bisphosphatase 1 [Mus musculus]	15	15	3	0	0	5.07322e+06	3.14068e+06	0	0	2	1
26024345	LCOR	NOT_in_TF_list		ligand-dependent corepressor [Mus musculus]	10	10	3	0	0	5.85113e+06	2.16641e+06	0	0	2	1
6680083	GRB2	NOT_in_TF_list		growth factor receptor-bound protein 2 [Mus musculus]	23	23	1	0	0	3.74661e+06	0	0	0	1	0
10946574	CKB	NOT_in_TF_list		creatine kinase B-type [Mus musculus]	9	12	1	1.08561e+06	0	0	0	1	0	0	0
251823812	MARK3	NOT_in_TF_list		MAP/microtubule affinity-regulating kinase 3 isoform 2 [Mus musculus]	15	15	5	8.12961e+06	0	1.42894e+07	0	1	2	2	0
6755604	SOX17	GeneID:64321	Mus musculus	transcription factor SOX-17 [Mus musculus]	27	27	1	0	0	0	0	0	0	0	1
226437589	TNS1	NOT_in_TF_list		tensin 1 [Mus musculus]	8	9	10	0	0	5.58338e+06	2.78535e+06	0	0	6	4
24497431	NUPL1	NOT_in_TF_list		nucleoporin p58/p45 [Mus musculus]	16	18	3	398013	0	3.34706e+06	0	1	0	2	0
6680690	PRDX3	NOT_in_TF_list		thioredoxin-dependent peroxide reductase, mitochondrial precursor [Mus musculus]	10	10	2	0	0	1.48874e+07	0	0	1	1	0
12963555	NIT2	NOT_in_TF_list		omega-amidase NIT2 [Mus musculus]	6	10	1	1.02229e+06	0	0	0	1	0	0	0
227496903	CCDC12	NOT_in_TF_list		coiled-coil domain-containing protein 12 [Mus musculus]	22	35	1	0	0	5.41862e+07	0	0	0	1	0
21313424	DRAP1	GeneID:10589	Mus musculus	dr1-associated corepressor [Mus musculus]	11	11	1	0	0	0	6.00182e+06	0	0	0	1
31982332	GLUL	NOT_in_TF_list		glutamine synthetase [Mus musculus]	2	12	1	1.26289e+06	0	0	0	1	0	0	0
30387632	CDC23	NOT_in_TF_list		cell division cycle protein 23 homolog [Mus musculus]	1	14	3	0	0	1.5463e+06	476185	0	0	2	1
407264036	MisMatch	NOT_in_TF_list		PREDICTED: uncharacterized protein LOC101056084 [Mus musculus]	16	17	1	0	0	0	2.97768e+07	0	0	0	1
21312256	DCPS	NOT_in_TF_list		m7GpppX diphosphatase [Mus musculus]	31	32	1	0	0	785258	0	0	0	1	0
117553604	CES1D	NOT_in_TF_list		carboxylesterase 1D precursor [Mus musculus]	6	86	5	1.61388e+06	0	9.18738e+06	2.75404e+06	1	0	2	2
225543087	ZFP691	NOT_in_TF_list		zinc finger protein 691 [Mus musculus]	18	18	5	0	0	4.07229e+06	2.26914e+06	0	0	3	2
22094997	HAUS7	NOT_in_TF_list		HAUS augmin-like complex subunit 7 isoform 1 [Mus musculus]	26	28	1	1.68172e+06	0	0	0	1	0	0	0
10181116	MRPS31	NOT_in_TF_list		28S ribosomal protein S31, mitochondrial precursor [Mus musculus]	21	21	2	0	0	1.5284e+07	0	0	0	2	0
254939516	CYP2D22	NOT_in_TF_list		cytochrome P450, family 2, subfamily d, polypeptide 22 [Mus musculus]	30	36	3	0	0	0	3.43263e+06	0	1	0	2
33239431	RCC2	NOT_in_TF_list		protein RCC2 [Mus musculus]	33	34	3	0	0	4.42101e+06	0	0	1	2	0
39652626	BPNT1	NOT_in_TF_list		3'(2'),5'-bisphosphate nucleotidase 1 [Mus musculus]	14	14	2	604833	0	811480	0	1	0	1	0
13385626	MED4	NOT_in_TF_list		mediator of RNA polymerase II transcription subunit 4 [Mus musculus]	8	8	1	0	0	0	0	0	0	1	0
117647247	ZCCHC9	NOT_in_TF_list		zinc finger CCHC domain-containing protein 9 [Mus musculus]	21	21	1	0	0	2.95785e+06	0	0	0	1	0
163914388	DDX25	NOT_in_TF_list		ATP-dependent RNA helicase DDX25 [Mus musculus]	17	17	2	2.45715e+08	0	0	0	2	0	0	0
226437613	SYMPK	NOT_in_TF_list		symplekin [Mus musculus]	36	37	5	468780	0	1.51332e+06	1.04853e+06	1	0	3	1
181332994	QSER1	NOT_in_TF_list		glutamine and serine-rich protein 1 [Mus musculus]	1	20	5	1.50616e+06	0	1.10362e+06	0	1	0	4	0
6753164	BCKDK	NOT_in_TF_list		[3-methyl-2-oxobutanoate dehydrogenase [lipoamide]] kinase, mitochondrial precursor [Mus musculus]	28	28	1	0	0	1.34153e+07	0	0	0	1	0
31981178	NGLY1	NOT_in_TF_list		peptide-N(4)-(N-acetyl-beta-glucosaminyl)asparagine amidase [Mus musculus]	53	53	1	0	0	0	0	0	1	0	0
159032056	LSM4	NOT_in_TF_list		U6 snRNA-associated Sm-like protein LSm4 [Mus musculus]	18	18	1	1.45929e+06	0	0	0	1	0	0	0
125625320	SP2	GeneID:6668	Mus musculus	transcription factor Sp2 isoform 2 [Mus musculus]	1	20	2	0	0	0	0	0	2	0	0
49355804	ATP11C	NOT_in_TF_list		probable phospholipid-transporting ATPase 11C isoform b [Mus musculus]	19	19	5	1.17338e+06	0	6.18984e+06	2.78221e+06	1	0	3	1
89886443	TMEM120B	NOT_in_TF_list		transmembrane protein 120B [Mus musculus]	8	8	2	0	0	0	0	2	0	0	0
116063566	ABCC2	NOT_in_TF_list		canalicular multispecific organic anion transporter 1 [Mus musculus]	18	18	7	545143	0	3.25983e+06	0	1	1	5	0
71480138	SEC14L3	NOT_in_TF_list		SEC14-like protein 3 [Mus musculus]	15	15	1	2.43344e+06	0	0	0	1	0	0	0
21735445	PEX11C	NOT_in_TF_list		peroxisomal membrane protein 11C [Mus musculus]	42	42	1	0	0	1.40088e+06	0	0	0	1	0
21426851	KLK1B9	NOT_in_TF_list		kallikrein 1-related peptidase b9 precursor [Mus musculus]	9	9	2	0	0	2.8378e+06	0	0	0	2	0
254692873	TARS2	NOT_in_TF_list		threonine--tRNA ligase, mitochondrial isoform 4 [Mus musculus]	22	22	2	0	0	4.26926e+06	0	0	0	2	0
22165406	GJB1	NOT_in_TF_list		gap junction beta-1 protein [Mus musculus]	15	17	1	0	0	4.97909e+06	0	0	0	1	0
260269246	LINGO2	NOT_in_TF_list		leucine-rich repeat and immunoglobulin-like domain-containing nogo receptor-interacting protein 2 precursor [Mus musculus]	16	22	1	0	0	0	0	0	0	0	1
21703896	IFI27L2B	NOT_in_TF_list		interferon alpha-inducible protein 27-like protein 2B precursor [Mus musculus]	19	19	1	468712	0	0	0	1	0	0	0
305682577	D2WSU81E	NOT_in_TF_list		uncharacterized protein C9orf114 homolog [Mus musculus]	13	13	2	2015592	0	0	0	2	0	0	0
110626010	NT5DC1	NOT_in_TF_list		5'-nucleotidase domain-containing protein 1 [Mus musculus]	18	18	1	0	0	0	0	0	0	0	1
326368226	RECQL	NOT_in_TF_list		ATP-dependent DNA helicase Q1 isoform 3 [Mus musculus]	6	8	2	1.828e+07	0	729116	0	1	0	1	0
121674797	PPT1	NOT_in_TF_list		palmitoyl-protein thioesterase 1 precursor [Mus musculus]	16	16	1	1.62456e+06	0	0	0	1	0	0	0
444741673	MisMatch	NOT_in_TF_list		cysteine and histidine-rich protein 1 isoform 3 [Mus musculus]	16	16	1	0	0	3.71619e+07	0	0	0	1	0
76253678	MED27	NOT_in_TF_list		mediator of RNA polymerase II transcription subunit 27 [Mus musculus]	5	5	2	0	0	3.40471e+06	0	0	1	1	0
240848573	DHX36	NOT_in_TF_list		probable ATP-dependent RNA helicase DHX36 [Mus musculus]	5	27	4	2.53843e+06	0	2.22489e+06	0	2	0	2	0
227330633	PGM2	NOT_in_TF_list		phosphoglucomutase-2 [Mus musculus]	4	12	3	0	0	2.1394e+06	1.50426e+06	0	0	2	1
247300747	A430005L14RIK	NOT_in_TF_list		UPF0688 protein C1orf174 homolog isoform 1 [Mus musculus]	1	12	1	3.23987e+06	0	0	0	1	0	0	0
47059145	FNDC5	NOT_in_TF_list		fibronectin type III domain-containing protein 5 precursor [Mus musculus]	8	8	1	1.6149e+06	0	0	0	1	0	0	0
229608928	ACBD3	NOT_in_TF_list		Golgi resident protein GCP60 [Mus musculus]	53	57	2	0	0	4.92548e+06	0	1	0	1	0
34328230	AK2	NOT_in_TF_list		adenylate kinase 2, mitochondrial isoform b [Mus musculus]	11	11	1	4.31183e+06	0	0	0	1	0	0	0
6680832	CALM2	NOT_in_TF_list		calmodulin [Mus musculus]	6	17	1	0	0	2.12014e+06	0	0	0	1	0
148539955	D4WSU53E	NOT_in_TF_list		UPF0471 protein C1orf63 homolog [Mus musculus]	9	16	1	0	0	1.12771e+06	0	0	0	1	0
100816903	CLMN	NOT_in_TF_list		calmin isoform b [Mus musculus]	15	30	4	0	0	1.63545e+06	1.38625e+06	0	0	2	2
299758494	DAPK3	NOT_in_TF_list		death-associated protein kinase 3 isoform b [Mus musculus]	27	27	2	0	0	0	989748	0	1	0	1
15809002	SNF8	NOT_in_TF_list		vacuolar-sorting protein SNF8 [Mus musculus]	29	29	2	630795	0	970237	0	1	0	1	0
257467556	RRP7A	NOT_in_TF_list		ribosomal RNA-processing protein 7 homolog A [Mus musculus]	10	10	2	0	0	4.5829e+06	0	0	1	1	0
283806685	LUC7L2	NOT_in_TF_list		putative RNA-binding protein Luc7-like 2 isoform 3 [Mus musculus]	66	74	1	1.54009e+06	0	0	0	1	0	0	0
18079339	ACO2	NOT_in_TF_list		aconitate hydratase, mitochondrial precursor [Mus musculus]	1	42	6	1.46992e+06	0	3.45899e+06	1.86662e+06	2	0	2	2
33942078	ZFP184	GeneID:7738	Mus musculus	zinc finger protein 184 [Mus musculus]	2	43	5	0	0	1.851e+06	5.05661e+06	0	0	2	3
13507644	CPN1	NOT_in_TF_list		carboxypeptidase N catalytic chain precursor [Mus musculus]	2	17	2	0	0	0	1.08993e+06	0	1	0	1
254553412	C130039O16RIK	NOT_in_TF_list		uncharacterized protein LOC238317 [Mus musculus]	29	29	9	770491	0	4.3228e+06	1.81094e+06	1	1	4	3
58037197	ZNHIT1	NOT_in_TF_list		zinc finger HIT domain-containing protein 1 [Mus musculus]	10	10	1	0	0	0	0	0	1	0	0
160707896	STRAP	NOT_in_TF_list		serine-threonine kinase receptor-associated protein [Mus musculus]	5	5	1	0	0	1.37859e+06	0	0	0	1	0
27369676	SEPSECS	NOT_in_TF_list		O-phosphoseryl-tRNA(Sec) selenium transferase [Mus musculus]	7	7	1	0	0	0	0	0	0	0	1
21312520	QDPR	NOT_in_TF_list		dihydropteridine reductase [Mus musculus]	26	26	1	0	0	1.46127e+06	0	0	0	1	0
160333775	LDLRAP1	NOT_in_TF_list		low density lipoprotein receptor adapter protein 1 [Mus musculus]	31	31	1	0	0	4798302	0	0	0	1	0
166197675	RNMTL1	NOT_in_TF_list		RNA methyltransferase-like protein 1 [Mus musculus]	11	11	3	1.63466e+06	0	0	0	2	0	0	1
274325807	SOCS2	NOT_in_TF_list		suppressor of cytokine signaling 2 [Mus musculus]	3	3	1	0	0	0	3.38681e+06	0	0	0	1
307691260	GM6772	NOT_in_TF_list		uncharacterized protein LOC627607 [Mus musculus]	10	10	1	0	0	0	0	0	0	1	0
13195618	CHMP1B	NOT_in_TF_list		charged multivesicular body protein 1b-1 [Mus musculus]	6	14	1	0	0	1.21864e+06	0	0	0	1	0
407263189	MisMatch	NOT_in_TF_list		PREDICTED: envelope glycoprotein-like, partial [Mus musculus]	13	13	1	0	0	1.25018e+08	0	0	0	1	0
87080819	SLCO6B1	NOT_in_TF_list		solute carrier organic anion transporter family, member 6b1 [Mus musculus]	23	23	2	0	0	0	0	0	2	0	0
6754402	JUN	GeneID:3725	Mus musculus	transcription factor AP-1 [Mus musculus]	56	56	1	0	0	1.23833e+06	0	0	0	1	0
33695072	SLC17A8	NOT_in_TF_list		vesicular glutamate transporter 3 [Mus musculus]	23	27	1	0	0	0	1.46144e+08	0	0	0	1
6755540	SLC22A5	NOT_in_TF_list		solute carrier family 22 member 5 [Mus musculus]	34	34	1	0	0	0	0	0	0	1	0
123701991	RBM26	NOT_in_TF_list		RNA-binding protein 26 [Mus musculus]	21	21	8	4.25446e+06	0	678408	0	5	1	2	0
15778828	SHC1	NOT_in_TF_list		SHC-transforming protein 1 isoform b [Mus musculus]	1	14	4	0	0	1.58515e+06	455842	0	0	2	2
84871986	GPX1	NOT_in_TF_list		glutathione peroxidase 1 [Mus musculus]	24	24	1	0	0	4.31951e+06	0	0	0	1	0
33563260	AGFG1	NOT_in_TF_list		arf-GAP domain and FG repeat-containing protein 1 [Mus musculus]	18	20	3	0	0	6.32913e+06	0	0	0	3	0
20149752	TAB2	NOT_in_TF_list		TGF-beta-activated kinase 1 and MAP3K7-binding protein 2 [Mus musculus]	7	7	2	0	0	0	0	0	1	1	0
6678637	ZFP161	GeneID:7541	Mus musculus	zinc finger and BTB domain-containing protein 14 [Mus musculus]	35	35	1	0	0	2.17856e+08	0	0	0	1	0
6677873	STMN3	NOT_in_TF_list		stathmin-3 [Mus musculus]	16	16	1	0	0	2.0416e+06	0	0	0	1	0
58037133	NGDN	NOT_in_TF_list		neuroguidin [Mus musculus]	10	25	1	0	0	0	303522	0	0	0	1
40789289	RGS8	NOT_in_TF_list		regulator of G-protein signaling 8 [Mus musculus]	10	10	1	4.46422e+06	0	0	0	1	0	0	0
157909801	TOMM40	NOT_in_TF_list		mitochondrial import receptor subunit TOM40 homolog [Mus musculus]	16	16	1	1.30033e+06	0	0	0	1	0	0	0
157817372	MBD1	NOT_in_TF_list		methyl-CpG-binding domain protein 1 [Mus musculus]	17	17	3	2.00483e+06	0	0	3.90816e+06	2	0	0	1
24233554	SLC1A3	NOT_in_TF_list		excitatory amino acid transporter 1 [Mus musculus]	22	22	2	5.97041e+08	0	0	0	2	0	0	0
119433663	LUZP1	NOT_in_TF_list		leucine zipper protein 1 [Mus musculus]	8	8	3	0	0	1.31932e+06	0	0	0	2	1
254039646	CTTNBP2NL	NOT_in_TF_list		CTTNBP2 N-terminal-like protein [Mus musculus]	22	22	1	0	0	8.40568e+06	0	0	0	1	0
85861226	GRTP1	NOT_in_TF_list		growth hormone-regulated TBC protein 1 [Mus musculus]	10	10	2	0	0	0	1.46628e+06	0	0	0	2
257196179	IRF2BP2	NOT_in_TF_list		interferon regulatory factor 2-binding protein 2 [Mus musculus]	24	25	1	0	0	0	1.12841e+06	0	0	0	1
309271794	2210011C24RIK	NOT_in_TF_list		PREDICTED: uncharacterized protein LOC113230 [Mus musculus]	6	6	1	0	0	0	3.1776e+06	0	0	0	1
14994310	FAM158A	NOT_in_TF_list		ER membrane protein complex subunit 9 [Mus musculus]	8	8	1	0	0	2.82019e+07	0	0	0	1	0
22122569	TFB1M	NOT_in_TF_list		dimethyladenosine transferase 1, mitochondrial [Mus musculus]	32	32	1	0	0	1.53278e+06	0	0	0	1	0
84875532	MRPL1	NOT_in_TF_list		39S ribosomal protein L1, mitochondrial isoform 2 [Mus musculus]	5	6	1	0	0	4.46944e+06	0	0	0	1	0
292781697	SERPINB2	NOT_in_TF_list		plasminogen activator inhibitor 2, macrophage [Mus musculus]	6	6	1	0	0	0	0	1	0	0	0
62234443	INO80	NOT_in_TF_list		DNA helicase INO80 [Mus musculus]	9	9	6	0	0	2.7174e+06	717070	0	0	4	2
31982246	D11WSU47E	NOT_in_TF_list		uncharacterized protein C17orf80 homolog [Mus musculus]	6	8	1	0	0	2.24637e+06	0	0	0	1	0
7242181	PLD3	NOT_in_TF_list		phospholipase D3 [Mus musculus]	32	32	1	0	0	0	0	0	1	0	0
110625591	RBM22	NOT_in_TF_list		pre-mRNA-splicing factor RBM22 [Mus musculus]	13	13	2	2.10343e+06	0	0	2.80147e+06	1	0	0	1
47271358	FBXW14	NOT_in_TF_list		F-box and WD-40 domain protein 14 [Mus musculus]	9	14	1	0	0	678726	0	0	0	1	0
22122695	AIMP2	NOT_in_TF_list		aminoacyl tRNA synthase complex-interacting multifunctional protein 2 isoform 2 [Mus musculus]	15	15	1	0	0	822842	0	0	0	1	0
72535128	PXK	NOT_in_TF_list		PX domain-containing protein kinase-like protein short isoform [Mus musculus]	27	27	2	0	0	2307752	3.99222e+06	0	0	1	1
229577283	UCHL5	NOT_in_TF_list		ubiquitin carboxyl-terminal hydrolase isozyme L5 isoform 2 [Mus musculus]	20	21	1	0	0	8.29671e+06	0	0	0	1	0
21687186	CACNG8	NOT_in_TF_list		voltage-dependent calcium channel gamma-8 subunit [Mus musculus]	19	19	1	0	0	0	0	1	0	0	0
46402179	SEC24B	NOT_in_TF_list		protein transport protein Sec24B [Mus musculus]	17	17	4	0	0	1.99974e+06	933406	0	0	3	1
124378011	SLCO5A1	NOT_in_TF_list		solute carrier organic anion transporter family, member 5A1 [Mus musculus]	18	18	2	0	0	0	0	0	0	2	0
85701872	GM648	NOT_in_TF_list		uncharacterized protein LOC270599 [Mus musculus]	9	12	1	0	0	0	2.5846e+06	0	0	0	1
158937260	YIF1B	NOT_in_TF_list		protein YIF1B isoform 2 [Mus musculus]	23	23	1	703416	0	0	0	1	0	0	0
145966883	PSMD14	NOT_in_TF_list		26S proteasome non-ATPase regulatory subunit 14 [Mus musculus]	14	14	2	0	0	3.99111e+06	1.47603e+06	0	0	1	1
154146249	RPTOR	NOT_in_TF_list		regulatory-associated protein of mTOR [Mus musculus]	9	9	5	1.48289e+06	0	2.16089e+06	0	2	0	3	0
21313610	TADA1	NOT_in_TF_list		transcriptional adapter 1 [Mus musculus]	64	64	1	0	0	0	0	0	0	0	1
144922663	LACE1	NOT_in_TF_list		lactation elevated protein 1 [Mus musculus]	11	11	2	0	0	6.49982e+06	0	0	0	2	0
153791422	TATDN2	NOT_in_TF_list		TatD DNase domain containing 2 [Mus musculus]	10	10	1	0	0	56573898	0	0	0	1	0
27370304	SLC7A14	NOT_in_TF_list		probable cationic amino acid transporter [Mus musculus]	18	18	1	0	0	2.02995e+06	0	0	0	1	0
407262663	MisMatch	NOT_in_TF_list		PREDICTED: uncharacterized protein C2orf78 homolog [Mus musculus]	12	12	2	0	0	0	0	0	2	0	0
6754066	GRB7	NOT_in_TF_list		growth factor receptor-bound protein 7 [Mus musculus]	13	13	1	0	0	0	0	0	1	0	0
7305599	TTR	NOT_in_TF_list		transthyretin precursor [Mus musculus]	9	10	4	0	0	7.63616e+06	1.33397e+07	0	0	2	2
229092577	RHPN2	NOT_in_TF_list		rhophilin-2 [Mus musculus]	6	6	3	0	0	2.30758e+06	3.17038e+06	0	0	2	1
11230776	OCA2	NOT_in_TF_list		P protein [Mus musculus]	4	10	1	0	0	0	0	0	0	1	0
31981310	BCAP31	NOT_in_TF_list		B-cell receptor-associated protein 31 [Mus musculus]	11	11	1	0	0	1.11175e+06	0	0	0	1	0
22095027	SCMH1	NOT_in_TF_list		polycomb protein SCMH1 isoform 1 [Mus musculus]	16	39	2	0	0	3.25353e+07	0	0	0	2	0
31981592	EHD4	NOT_in_TF_list		EH domain-containing protein 4 [Mus musculus]	10	10	3	0	0	1.91245e+06	0	0	0	1	2
6752940	ABCG1	NOT_in_TF_list		ATP-binding cassette sub-family G member 1 [Mus musculus]	1	14	1	2.22354e+06	0	0	0	1	0	0	0
295148122	HOMEZ	GeneID:57594	Mus musculus	homeobox and leucine zipper protein Homez [Mus musculus]	1	14	1	0	0	0	0	0	0	0	1
269315840	GADD45GIP1	NOT_in_TF_list		growth arrest and DNA damage-inducible proteins-interacting protein 1 [Mus musculus]	14	14	1	0	0	1.33966e+06	0	0	0	1	0
32189438	TCEA3	NOT_in_TF_list		transcription elongation factor A protein 3 [Mus musculus]	58	70	1	1.09866e+06	0	0	0	1	0	0	0
56744242	AP1G1	NOT_in_TF_list		AP-1 complex subunit gamma-1 [Mus musculus]	23	23	2	0	0	3.13957e+06	0	0	0	2	0
254553424	THOC3	NOT_in_TF_list		THO complex subunit 3 [Mus musculus]	8	8	3	0	0	1.15723e+07	2.75086e+06	0	0	1	2
124107612	PRDM13	NOT_in_TF_list		PR domain zinc finger protein 13 [Mus musculus]	4	4	1	0	0	0	2.24853e+08	0	0	0	1
239916007	RFX1	GeneID:5989	Mus musculus	MHC class II regulatory factor RFX1 [Mus musculus]	5	5	4	0	0	2.27861e+06	1.02321e+06	0	0	3	1
9789907	STUB1	NOT_in_TF_list		STIP1 homology and U box-containing protein 1 [Mus musculus]	5	10	1	806819	0	0	0	1	0	0	0
30519927	REEP3	NOT_in_TF_list		receptor expression-enhancing protein 3 isoform 2 [Mus musculus]	3	33	1	0	0	884691	0	0	0	1	0
6677795	POLR2A	NOT_in_TF_list		DNA-directed RNA polymerase II subunit RPB1 [Mus musculus]	4	12	4	960387	0	1.96289e+06	0	1	0	3	0
160708005	FGD6	NOT_in_TF_list		FYVE, RhoGEF and PH domain-containing protein 6 [Mus musculus]	4	4	5	0	0	2.94886e+06	1.48324e+06	0	0	3	2
268837283	5830433M19RIK	NOT_in_TF_list		caspase activity and apoptosis inhibitor 1 [Mus musculus]	1	12	1	0	0	0	1.32124e+06	0	0	0	1
377837102	MisMatch	NOT_in_TF_list		PREDICTED: uncharacterized protein C17orf47 homolog [Mus musculus]	1	17	1	0	0	0	0	0	1	0	0
7242187	LGMN	NOT_in_TF_list		legumain precursor [Mus musculus]	21	21	2	2.17858e+06	0	3.27577e+06	0	1	0	1	0
6680351	IRGM1	NOT_in_TF_list		immunity-related GTPase family M protein 1 [Mus musculus]	14	14	1	0	0	481724	0	0	0	1	0
13928670	VPS35	NOT_in_TF_list		vacuolar protein sorting-associated protein 35 [Mus musculus]	16	16	3	264046	0	718400	0	1	1	1	0
160707967	ALAS1	NOT_in_TF_list		5-aminolevulinate synthase, nonspecific, mitochondrial precursor [Mus musculus]	8	8	2	0	0	4.06865e+06	0	0	0	2	0
19526846	TMEM19	NOT_in_TF_list		transmembrane protein 19 [Mus musculus]	14	19	1	2.28208e+06	0	0	0	1	0	0	0
6677659	DNAJC2	GeneID:27000	Mus musculus	dnaJ homolog subfamily C member 2 [Mus musculus]	16	16	2	0	0	2.80623e+06	747071	0	0	1	1
6753912	FTH1	NOT_in_TF_list		ferritin heavy chain [Mus musculus]	3	9	3	0	0	1.42368e+07	0	0	0	3	0
226246531	PGK2	NOT_in_TF_list		phosphoglycerate kinase 2 [Mus musculus]	10	10	1	0	0	33410930	0	0	0	1	0
158749640	PREB	NOT_in_TF_list		prolactin regulatory element-binding protein [Mus musculus]	3	3	2	1.5215e+06	0	0	0	1	1	0	0
21919420	DHX35	NOT_in_TF_list		probable ATP-dependent RNA helicase DHX35 [Mus musculus]	19	23	3	0	0	3.62143e+06	1.84115e+06	0	0	2	1
22164784	FADS1	NOT_in_TF_list		fatty acid desaturase 1 [Mus musculus]	17	20	1	0	0	0	0	1	0	0	0
160333304	APOA1	NOT_in_TF_list		apolipoprotein A-I preproprotein [Mus musculus]	4	4	1	0	0	0	3.25299e+07	0	0	0	1
213972641	RBM43	NOT_in_TF_list		RNA-binding protein 43 [Mus musculus]	3	14	1	1.30775e+06	0	0	0	1	0	0	0
31560355	HACL1	NOT_in_TF_list		2-hydroxyacyl-CoA lyase 1 [Mus musculus]	10	10	2	878576	0	0	0	1	1	0	0
270483798	NAT2	NOT_in_TF_list		arylamine N-acetyltransferase 2 [Mus musculus]	1	17	1	0	0	1.3772e+06	0	0	0	1	0
225543185	VWA5A	NOT_in_TF_list		von Willebrand factor A domain-containing protein 5A [Mus musculus]	58	58	3	0	0	1.40068e+06	2.53624e+06	0	1	1	1
6754156	HAO1	NOT_in_TF_list		hydroxyacid oxidase 1 [Mus musculus]	12	12	1	266122	0	0	0	1	0	0	0
251823893	HAUS8	NOT_in_TF_list		HAUS augmin-like complex subunit 8 isoform 2 [Mus musculus]	10	10	1	1.28694e+06	0	0	0	1	0	0	0
6755879	TRIP6	NOT_in_TF_list		thyroid receptor-interacting protein 6 [Mus musculus]	8	8	1	0	0	6.32472e+06	0	0	0	1	0
7305085	GFPT1	NOT_in_TF_list		glutamine--fructose-6-phosphate aminotransferase [isomerizing] 1 [Mus musculus]	11	11	2	583528	0	0	0	2	0	0	0
312261233	PRRC2A	NOT_in_TF_list		protein PRRC2A isoform 2 [Mus musculus]	5	5	5	609455	0	1.60873e+06	1.12607e+06	1	0	2	2
13385312	PLIN3	NOT_in_TF_list		perilipin-3 [Mus musculus]	15	15	1	0	0	772466	0	0	0	1	0
116014342	BSG	NOT_in_TF_list		basigin isoform 2 precursor [Mus musculus]	29	29	2	4.07198e+06	0	0	0	2	0	0	0
227496421	TASP1	NOT_in_TF_list		threonine aspartase 1 isoform b [Mus musculus]	10	10	1	0	0	0	0	0	0	1	0
165377226	SLC2A1	NOT_in_TF_list		solute carrier family 2, facilitated glucose transporter member 1 [Mus musculus]	21	21	2	1.53744e+06	0	0	0	2	0	0	0
56711264	ASAP3	NOT_in_TF_list		arf-GAP with SH3 domain, ANK repeat and PH domain-containing protein 3 [Mus musculus]	28	28	1	0	0	0	0	1	0	0	0
61651673	STT3B	NOT_in_TF_list		dolichyl-diphosphooligosaccharide--protein glycosyltransferase subunit STT3B [Mus musculus]	6	6	3	0	0	1666659	1.65714e+06	0	0	2	1
312623949	ASMT	NOT_in_TF_list		acetylserotonin O-methyltransferase [Mus musculus]	11	11	1	0	0	9.59328e+07	0	0	0	1	0
254692991	EXOSC8	NOT_in_TF_list		exosome complex component RRP43 isoform 2 [Mus musculus]	8	8	1	589092	0	0	0	1	0	0	0
148540106	MUT	NOT_in_TF_list		methylmalonyl-CoA mutase, mitochondrial precursor [Mus musculus]	15	15	2	993189	0	2.80666e+06	0	1	0	1	0
6755206	PSMB7	NOT_in_TF_list		proteasome subunit beta type-7 precursor [Mus musculus]	13	13	1	1.4279e+06	0	0	0	1	0	0	0
22726191	UBQLN1	NOT_in_TF_list		ubiquilin-1 isoform 2 [Mus musculus]	20	25	1	2.29085e+06	0	0	0	1	0	0	0
21704248	RRP9	NOT_in_TF_list		U3 small nucleolar RNA-interacting protein 2 [Mus musculus]	9	10	2	0	0	3.14464e+06	2.90711e+06	0	0	1	1
255308901	PRR18	NOT_in_TF_list		proline-rich protein 18 [Mus musculus]	19	19	1	0	0	0	1.30974e+08	0	0	0	1
9910314	CLCF1	NOT_in_TF_list		cardiotrophin-like cytokine factor 1 precursor [Mus musculus]	6	6	1	0	0	4.48822e+07	0	0	0	1	0
125660462	FAM26E	NOT_in_TF_list		protein FAM26E [Mus musculus]	1	15	3	0	0	2.09507e+07	2.0707e+07	0	0	1	2
31982726	SRPK1	NOT_in_TF_list		SRSF protein kinase 1 [Mus musculus]	20	20	2	0	0	995925	0	0	1	1	0
166851848	LRWD1	NOT_in_TF_list		leucine-rich repeat and WD repeat-containing protein 1 [Mus musculus]	13	15	2	0	0	1.84777e+06	0	0	1	1	0
21450289	SESN2	NOT_in_TF_list		sestrin-2 [Mus musculus]	10	10	2	0	0	0	466707	0	0	0	2
22122769	TAT	NOT_in_TF_list		tyrosine aminotransferase [Mus musculus]	9	10	2	0	0	3.51932e+06	0	0	0	2	0
170650653	2310022A10RIK	NOT_in_TF_list		uncharacterized protein C19orf47 homolog isoform 2 [Mus musculus]	12	12	2	880987	0	1.39605e+06	0	1	0	1	0
27370042	SDAD1	NOT_in_TF_list		protein SDA1 homolog [Mus musculus]	32	32	2	1.25272e+06	0	0	2.25465e+06	1	0	0	1
56699440	DHX8	NOT_in_TF_list		ATP-dependent RNA helicase DHX8 [Mus musculus]	8	8	5	1.36006e+08	0	3.71972e+07	1.10321e+07	1	0	3	1
139948568	SNAP29	NOT_in_TF_list		synaptosomal-associated protein 29 [Mus musculus]	42	43	1	0	0	1.08934e+08	0	0	0	1	0
112363098	PGR	GeneID:5241	Mus musculus	progesterone receptor [Mus musculus]	7	7	1	0	0	0	6.1162e+06	0	0	0	1
228480238	PRPF31	NOT_in_TF_list		U4/U6 small nuclear ribonucleoprotein Prp31 isoform 2 [Mus musculus]	28	30	1	0	0	3.04226e+06	0	0	0	1	0
262050570	BRCC3	NOT_in_TF_list		lys-63-specific deubiquitinase BRCC36 [Mus musculus]	1	13	1	0	0	9.28958e+07	0	0	0	1	0
102468565	TXNRD2	NOT_in_TF_list		thioredoxin reductase 2, mitochondrial precursor [Mus musculus]	20	20	1	0	0	1.03905e+06	0	0	0	1	0
84993724	KCNRG	NOT_in_TF_list		potassium channel regulatory protein isoform 1 [Mus musculus]	24	25	1	5.21065e+06	0	0	0	1	0	0	0
22507321	ZFAND3	NOT_in_TF_list		AN1-type zinc finger protein 3 [Mus musculus]	4	10	1	0	0	14968665	0	0	0	1	0
167736347	EHBP1L1	NOT_in_TF_list		EH domain-binding protein 1-like protein 1 isoform C [Mus musculus]	9	9	1	0	0	0	0	1	0	0	0
30424571	8430410A17RIK	NOT_in_TF_list		UPF0361 protein C3orf37 homolog [Mus musculus]	5	5	1	7.44277e+06	0	0	0	1	0	0	0
38261958	SCD4	NOT_in_TF_list		stearoyl-CoA desaturase 4 [Mus musculus]	10	10	1	0	0	375789	0	0	0	1	0
19527322	LETMD1	NOT_in_TF_list		LETM1 domain-containing protein 1 [Mus musculus]	13	13	1	1.76427e+06	0	0	0	1	0	0	0
239052674	MVP	NOT_in_TF_list		major vault protein [Mus musculus]	11	11	2	0	0	1.69707e+06	0	0	0	2	0
166999494	SLC16A10	NOT_in_TF_list		monocarboxylate transporter 10 isoform 1 [Mus musculus]	10	10	1	0	0	0	0	0	0	1	0
153945856	KRT39	NOT_in_TF_list		keratin, type I cytoskeletal 39 [Mus musculus]	2	17	2	0	0	0	1.95981e+07	0	0	0	2
11096336	CHST7	NOT_in_TF_list		carbohydrate sulfotransferase 7 precursor [Mus musculus]	18	18	1	17325512	0	0	0	1	0	0	0
38455422	PHLDB1	NOT_in_TF_list		pleckstrin homology-like domain family B member 1 [Mus musculus]	20	24	6	1.21392e+06	0	3.3065e+06	979233	1	0	4	1
13384850	SSR2	NOT_in_TF_list		translocon-associated protein subunit beta precursor [Mus musculus]	9	9	1	0	0	2.06431e+06	0	0	0	1	0
22122387	CTH	NOT_in_TF_list		cystathionine gamma-lyase [Mus musculus]	17	17	1	0	0	0	0	1	0	0	0
254750742	PEX16	NOT_in_TF_list		peroxisomal biogenesis factor 16 [Mus musculus]	66	66	1	420662	0	0	0	1	0	0	0
29244214	SLC35D1	NOT_in_TF_list		solute carrier family 35 (UDP-glucuronic acid/UDP-N-acetylgalactosamine dual transporter), member D1 [Mus musculus]	9	11	1	0	0	766844	0	0	0	1	0
255759892	ADD3	NOT_in_TF_list		gamma-adducin isoform b [Mus musculus]	1	15	2	0	0	0	0	0	0	1	1
86262151	ARHGAP5	NOT_in_TF_list		rho GTPase-activating protein 5 [Mus musculus]	11	15	4	0	0	1.69309e+06	881316	0	0	2	2
24025662	IL17RD	NOT_in_TF_list		interleukin-17 receptor D precursor [Mus musculus]	34	34	1	0	0	0	0	0	0	0	1
295317311	ATXN7L1	NOT_in_TF_list		ataxin-7-like protein 1 isoform 1 [Mus musculus]	24	38	1	0	0	0	0	0	0	1	0
9790221	ARPC1A	NOT_in_TF_list		actin-related protein 2/3 complex subunit 1A [Mus musculus]	11	12	1	3.27345e+06	0	0	0	1	0	0	0
6753798	F2	NOT_in_TF_list		prothrombin precursor [Mus musculus]	14	14	2	0	0	1.4516e+06	0	0	0	2	0
226423873	DBNL	NOT_in_TF_list		drebrin-like protein isoform 3 [Mus musculus]	17	17	2	0	0	1.38445e+06	903245	0	0	1	1
255003755	FAM76A	NOT_in_TF_list		protein FAM76A isoform B [Mus musculus]	10	11	1	450779	0	0	0	1	0	0	0
34328291	NSMCE1	NOT_in_TF_list		non-structural maintenance of chromosomes element 1 homolog [Mus musculus]	5	5	1	0	0	360758	0	0	0	1	0
293629270	MYC	GeneID:4609	Mus musculus	myc proto-oncogene protein isoform b [Mus musculus]	16	16	1	0	0	0	1.88859e+06	0	0	0	1
261862299	ARMCX2	NOT_in_TF_list		armadillo repeat-containing X-linked protein 2 [Mus musculus]	10	13	1	0	0	0	0	0	0	0	1
148540184	SRFBP1	NOT_in_TF_list		serum response factor-binding protein 1 [Mus musculus]	13	13	1	0	0	0	4.09855e+06	0	0	0	1
31044436	D4BWG0951E	NOT_in_TF_list		leucine rich adaptor protein 1-like [Mus musculus]	9	9	1	0	0	1.16485e+06	0	0	0	1	0
22122357	STAP2	NOT_in_TF_list		signal-transducing adaptor protein 2 [Mus musculus]	11	24	1	0	0	4.57017e+06	0	0	0	1	0
167860141	JMJD7	NOT_in_TF_list		jmjC domain-containing protein 7 [Mus musculus]	24	24	1	0	0	4583671	0	0	0	1	0
118403322	ACAD8	NOT_in_TF_list		isobutyryl-CoA dehydrogenase, mitochondrial precursor [Mus musculus]	17	17	1	0	0	1.7937e+06	0	0	0	1	0
121949821	ATF4	GeneID:468	Mus musculus	cyclic AMP-dependent transcription factor ATF-4 [Mus musculus]	20	21	1	0	0	0	1.22546e+06	0	0	0	1
73661178	AGXT2	NOT_in_TF_list		alanine--glyoxylate aminotransferase 2, mitochondrial [Mus musculus]	8	8	2	0	0	2.76243e+06	1.43299e+06	0	0	1	1
120952633	FGFR1	NOT_in_TF_list		fibroblast growth factor receptor 1 isoform 3 precursor [Mus musculus]	6	10	1	0	0	0	1.3794e+08	0	0	0	1
19705578	ATP6V1B2	NOT_in_TF_list		V-type proton ATPase subunit B, brain isoform [Mus musculus]	8	8	2	0	0	97508.1	857016	0	0	1	1
159110508	HPN	NOT_in_TF_list		serine protease hepsin isoform 2 precursor [Mus musculus]	11	11	3	0	0	6.36154e+07	3.5738e+07	0	0	2	1
172072657	ALG2	NOT_in_TF_list		alpha-1,3/1,6-mannosyltransferase ALG2 [Mus musculus]	14	14	2	4.35783e+06	0	8.11728e+06	0	1	0	1	0
31560712	CSK	NOT_in_TF_list		tyrosine-protein kinase CSK [Mus musculus]	3	10	1	0	0	2.2152e+06	0	0	0	1	0
18700028	CARD14	NOT_in_TF_list		caspase recruitment domain-containing protein 14 [Mus musculus]	22	22	1	0	0	0	0	0	0	0	1
323462203	CWC22	NOT_in_TF_list		pre-mRNA-splicing factor CWC22 homolog isoform 2 [Mus musculus]	54	55	3	0	0	2.54192e+06	0	0	0	3	0
134053905	PSMD11	NOT_in_TF_list		26S proteasome non-ATPase regulatory subunit 11 [Mus musculus]	1	10	1	0	0	2.35098e+06	0	0	0	1	0
11230780	TSG101	NOT_in_TF_list		tumor susceptibility gene 101 protein [Mus musculus]	20	20	1	0	0	2.57786e+06	0	0	0	1	0
158635992	PDLIM1	NOT_in_TF_list		PDZ and LIM domain protein 1 [Mus musculus]	13	13	2	960510	0	774584	0	1	0	1	0
6678668	ARHGEF1	NOT_in_TF_list		rho guanine nucleotide exchange factor 1 isoform d [Mus musculus]	21	21	1	0	0	0	142255	0	0	0	1
157412265	CNNM1	NOT_in_TF_list		metal transporter CNNM1 [Mus musculus]	4	7	1	320822	0	0	0	1	0	0	0
41235779	TRIM56	NOT_in_TF_list		E3 ubiquitin-protein ligase TRIM56 [Mus musculus]	17	17	1	0	0	0	0	0	1	0	0
147906108	2310030N02RIK	NOT_in_TF_list		NADH dehydrogenase (ubiquinone) complex I, assembly factor 6 precursor [Mus musculus]	10	10	1	0	0	2.80583e+06	0	0	0	1	0
327180707	PPP2R2A	NOT_in_TF_list		serine/threonine-protein phosphatase 2A 55 kDa regulatory subunit B alpha isoform isoform 2 [Mus musculus]	7	7	1	0	0	2.99814e+06	0	0	0	1	0
46402263	ZFP532	NOT_in_TF_list		zinc finger protein 532 [Mus musculus]	11	11	1	714086	0	0	0	1	0	0	0
254692896	A930038C07RIK	NOT_in_TF_list		protein NDNF precursor [Mus musculus]	4	4	2	0	0	1.68654e+06	0	0	0	2	0
84579893	STX17	NOT_in_TF_list		syntaxin-17 [Mus musculus]	5	12	1	2.00344e+06	0	0	0	1	0	0	0
6753944	GAMT	NOT_in_TF_list		guanidinoacetate N-methyltransferase [Mus musculus]	15	15	1	0	0	2.36638e+06	0	0	0	1	0
8393866	OAT	NOT_in_TF_list		ornithine aminotransferase, mitochondrial precursor [Mus musculus]	30	30	2	0	0	4.91014e+06	2.48667e+06	0	0	1	1
31982697	TDO2	NOT_in_TF_list		tryptophan 2,3-dioxygenase [Mus musculus]	13	13	1	0	0	6.89841e+06	0	0	0	1	0
110815830	SIK1	NOT_in_TF_list		serine/threonine-protein kinase SIK1 [Mus musculus]	3	24	1	0	0	0	2.1821e+07	0	0	0	1
84042523	CTSA	NOT_in_TF_list		lysosomal protective protein isoform b preproprotein [Mus musculus]	7	7	1	0	0	9.46371e+06	0	0	0	1	0
29789128	MRPS30	NOT_in_TF_list		28S ribosomal protein S30, mitochondrial [Mus musculus]	2	12	1	0	0	0	0	0	0	0	1
6677939	SHD	NOT_in_TF_list		SH2 domain-containing adapter protein D isoform 2 [Mus musculus]	16	16	1	0	0	0	6.03592e+06	0	0	0	1
160420299	DDX46	NOT_in_TF_list		probable ATP-dependent RNA helicase DDX46 [Mus musculus]	9	9	2	0	0	962365	4.09779e+06	0	0	1	1
46518506	AMACR	NOT_in_TF_list		alpha-methylacyl-CoA racemase [Mus musculus]	11	13	1	0	0	1.45756e+06	0	0	0	1	0
410025486	MisMatch	NOT_in_TF_list		flap endonuclease 1 [Mus musculus]	13	13	1	4.29416e+06	0	0	0	1	0	0	0
21312358	NSUN4	NOT_in_TF_list		putative methyltransferase NSUN4 [Mus musculus]	13	13	1	711309	0	0	0	1	0	0	0
7305035	EPB4.2	NOT_in_TF_list		erythrocyte membrane protein band 4.2 [Mus musculus]	1	13	2	2.6304e+07	0	0	0	2	0	0	0
254675217	VPS18	NOT_in_TF_list		vacuolar protein sorting-associated protein 18 homolog [Mus musculus]	6	6	3	2.08741e+07	0	2.06607e+06	0	1	0	1	1
123701554	ZFP37	GeneID:7539	Mus musculus	zinc finger protein 37 [Mus musculus]	15	16	5	0	0	1.851e+06	2.26914e+06	0	1	2	2
21312518	TRMU	NOT_in_TF_list		mitochondrial tRNA-specific 2-thiouridylase 1 [Mus musculus]	10	12	1	0	0	1.29892e+06	0	0	0	1	0
367460068	MisMatch	NOT_in_TF_list		unconventional myosin-VIIa isoform 4 [Mus musculus]	15	15	5	0	0	1.66753e+06	0	0	0	5	0
61742831	CCDC120	NOT_in_TF_list		coiled-coil domain containing 120 [Mus musculus]	14	14	3	0	0	0	0	0	0	1	2
240120112	FAH	NOT_in_TF_list		fumarylacetoacetase [Mus musculus]	13	13	1	4.06795e+06	0	0	0	1	0	0	0
226494680	TTC7B	NOT_in_TF_list		tetratricopeptide repeat domain 7B [Mus musculus]	35	35	1	4.7251e+06	0	0	0	1	0	0	0
407263631	MisMatch	NOT_in_TF_list		PREDICTED: protein TSPEAR [Mus musculus]	111	114	1	0	0	0	1.21053e+07	0	0	0	1
254675215	CAPNS2	NOT_in_TF_list		calpain small subunit 2 [Mus musculus]	9	9	1	1.03172e+06	0	0	0	1	0	0	0
160358829	HPX	NOT_in_TF_list		hemopexin precursor [Mus musculus]	22	22	1	0	0	2.62211e+06	0	0	0	1	0
6755212	PSME1	NOT_in_TF_list		proteasome activator complex subunit 1 [Mus musculus]	6	6	1	0	0	1.05202e+06	0	0	0	1	0
82546887	RADIL	NOT_in_TF_list		ras-associating and dilute domain-containing protein [Mus musculus]	19	19	1	0	0	0	0	0	0	1	0
56961627	FBXO45	NOT_in_TF_list		F-box/SPRY domain-containing protein 1 [Mus musculus]	9	9	1	0	0	8.12965e+06	0	0	0	1	0
8567384	PBX2	GeneID:5089	Mus musculus	pre-B-cell leukemia transcription factor 2 [Mus musculus]	14	17	4	0	0	618335	626164	0	0	2	2
224177538	4930451C15RIK	NOT_in_TF_list		leucine-rich repeat-containing protein LOC400891 homolog isoform 2 [Mus musculus]	8	8	1	0	0	0	1.90861e+06	0	0	0	1
124487291	CWF19L1	NOT_in_TF_list		CWF19-like protein 1 [Mus musculus]	21	23	1	0	0	0	0	0	1	0	0
28893223	PHF8	NOT_in_TF_list		histone lysine demethylase PHF8 isoform a [Mus musculus]	6	6	2	975237	0	0	0	1	0	1	0
254028208	4933407C03RIK	NOT_in_TF_list		C-Maf-inducing protein isoform 2 [Mus musculus]	46	46	1	0	0	0	509898096	0	0	0	1
253795509	RNF20	NOT_in_TF_list		E3 ubiquitin-protein ligase BRE1A [Mus musculus]	10	10	3	0	0	2.92593e+06	1.73166e+06	0	1	1	1
30794156	UBA7	NOT_in_TF_list		ubiquitin-like modifier-activating enzyme 7 [Mus musculus]	1	11	1	0	0	0	0	0	0	0	1
6753434	CLCN6	NOT_in_TF_list		chloride transport protein 6 [Mus musculus]	13	13	1	0	0	0	0	0	0	1	0
57164407	TANC1	NOT_in_TF_list		protein TANC1 [Mus musculus]	9	9	5	643469	0	1.44288e+06	818705	2	0	1	2
139948347	PARS2	NOT_in_TF_list		probable proline--tRNA ligase, mitochondrial isoform 1 [Mus musculus]	12	13	1	0	0	0	424751	0	0	0	1
56606137	BCL9	NOT_in_TF_list		B-cell CLL/lymphoma 9 protein [Mus musculus]	13	16	1	1.71914e+06	0	0	0	1	0	0	0
205361118	CCDC34	NOT_in_TF_list		coiled-coil domain-containing protein 34 [Mus musculus]	12	12	1	4.32118e+07	0	0	0	1	0	0	0
47059078	ZFP191	GeneID:7572	Mus musculus	zinc finger protein 24 [Mus musculus]	28	28	2	0	0	1.33314e+06	675349	0	0	1	1
6755160	EIF2AK2	NOT_in_TF_list		interferon-induced, double-stranded RNA-activated protein kinase [Mus musculus]	28	28	1	0	0	1.16358e+06	0	0	0	1	0
113195678	LAMP1	NOT_in_TF_list		lysosome-associated membrane glycoprotein 1 precursor [Mus musculus]	10	10	1	2.28155e+06	0	0	0	1	0	0	0
359718941	MisMatch	NOT_in_TF_list		E3 ubiquitin-protein ligase Hakai isoform 3 [Mus musculus]	14	19	1	0	0	230666	0	0	0	1	0
13385878	SNX2	NOT_in_TF_list		sorting nexin-2 [Mus musculus]	30	31	2	587614	0	2084090	0	1	0	1	0
83649715	BRSK1	NOT_in_TF_list		serine/threonine-protein kinase BRSK1 isoform 1 [Mus musculus]	8	8	1	0	0	0	3.01949e+06	0	0	0	1
116089273	GDI2	NOT_in_TF_list		rab GDP dissociation inhibitor beta [Mus musculus]	13	13	1	0	0	0	0	1	0	0	0
240120123	HGD	NOT_in_TF_list		homogentisate 1,2-dioxygenase [Mus musculus]	18	18	1	0	0	5.2404e+06	0	0	0	1	0
124486644	FBXO11	NOT_in_TF_list		F-box only protein 11 [Mus musculus]	6	6	2	1.18896e+06	0	0	0	2	0	0	0
132626693	MDC1	NOT_in_TF_list		mediator of DNA damage checkpoint protein 1 [Mus musculus]	8	8	5	0	0	2.90573e+06	2618775	0	0	4	1
160333268	ZFP703	NOT_in_TF_list		zinc finger protein 703 isoform 1 [Mus musculus]	6	6	1	0	0	0	0	0	1	0	0
156231054	POM121	NOT_in_TF_list		nuclear envelope pore membrane protein POM 121 [Mus musculus]	15	15	3	0	0	3.14355e+06	0	0	0	3	0
163937838	NFAT5	GeneID:10725	Mus musculus	nuclear factor of activated T-cells 5 isoform a [Mus musculus]	6	6	6	0	0	4.5645e+06	1.33382e+06	0	0	5	1
309268623	GM15448	NOT_in_TF_list		PREDICTED: leukocyte immunoglobulin-like receptor subfamily B member 3-like [Mus musculus]	3	3	3	0	0	2.55276e+07	8.12697e+06	0	0	1	2
31982186	MDH2	NOT_in_TF_list		malate dehydrogenase, mitochondrial precursor [Mus musculus]	5	5	1	1.16309e+06	0	0	0	1	0	0	0
6755995	WDR1	NOT_in_TF_list		WD repeat-containing protein 1 [Mus musculus]	53	53	1	0	0	0	0	1	0	0	0
242332585	PKP3	NOT_in_TF_list		plakophilin-3 isoform 1 [Mus musculus]	14	17	2	0	0	297674	0	0	0	2	0
117956379	TEKT1	NOT_in_TF_list		tektin-1 [Mus musculus]	15	15	1	1.09646e+07	0	0	0	1	0	0	0
31980859	ARHGEF7	NOT_in_TF_list		rho guanine nucleotide exchange factor 7 isoform c [Mus musculus]	14	14	1	0	0	0	0	0	1	0	0
33859596	P4HA1	NOT_in_TF_list		prolyl 4-hydroxylase subunit alpha-1 precursor [Mus musculus]	20	20	1	0	0	632581	0	0	0	1	0
30017341	MTERFD2	NOT_in_TF_list		mTERF domain-containing protein 2 [Mus musculus]	6	6	1	0	0	0	0	0	1	0	0
40254377	ABHD2	NOT_in_TF_list		abhydrolase domain-containing protein 2 [Mus musculus]	5	5	1	0	0	0	0	0	1	0	0
165905619	CCDC86	NOT_in_TF_list		coiled-coil domain-containing protein 86 [Mus musculus]	14	14	1	0	0	0	869872	0	0	0	1
6753966	GPD1	NOT_in_TF_list		glycerol-3-phosphate dehydrogenase [NAD(+)], cytoplasmic [Mus musculus]	36	48	1	1.49294e+06	0	0	0	1	0	0	0
254675292	AMDHD1	NOT_in_TF_list		probable imidazolonepropionase [Mus musculus]	19	23	1	509536	0	0	0	1	0	0	0
157364978	CYP3A41B	NOT_in_TF_list		cytochrome P450 3A41 [Mus musculus]	13	13	1	0	0	1.06888e+07	0	0	0	1	0
255069776	2310057J16RIK	NOT_in_TF_list		calmodulin-regulated spectrin-associated protein 3 isoform 2 [Mus musculus]	12	12	3	0	0	1.22865e+06	1.74438e+06	0	0	2	1
261823966	ZFML	NOT_in_TF_list		zinc finger protein 638 isoform 1 [Mus musculus]	6	6	7	171274	0	4.34369e+06	929605	1	0	3	3
167830460	STXBP5L	NOT_in_TF_list		syntaxin-binding protein 5-like isoform s [Mus musculus]	7	11	1	0	0	0	0	0	0	1	0
165972313	GTPBP6	NOT_in_TF_list		putative GTP-binding protein 6 [Mus musculus]	2	12	1	0	0	0	0	0	0	1	0
84370300	AGAP2	NOT_in_TF_list		arf-GAP with GTPase, ANK repeat and PH domain-containing protein 2 [Mus musculus]	3	3	1	0	0	0	0	0	0	1	0
157951696	NARS2	NOT_in_TF_list		probable asparagine--tRNA ligase, mitochondrial precursor [Mus musculus]	25	25	1	0	0	0	0	0	0	1	0
18158420	CAMK2D	NOT_in_TF_list		calcium/calmodulin-dependent protein kinase type II subunit delta isoform 3 [Mus musculus]	11	11	1	0	0	5.87802e+06	0	0	0	1	0
407264266	MisMatch	NOT_in_TF_list		PREDICTED: lipase member K-like [Mus musculus]	8	8	1	0	0	0	0	0	0	1	0
124487350	BCHE	NOT_in_TF_list		cholinesterase precursor [Mus musculus]	14	14	1	0	0	0	3.1822e+06	0	0	0	1
27753981	SREBF1	GeneID:6720	Mus musculus	sterol regulatory element-binding protein 1 precursor [Mus musculus]	13	13	1	0	0	0	0	1	0	0	0
295293142	DIS3L	NOT_in_TF_list		DIS3-like exonuclease 1 isoform 2 [Mus musculus]	7	7	1	0	0	0	0	0	1	0	0
27369557	FASTKD2	NOT_in_TF_list		FAST kinase domain-containing protein 2 [Mus musculus]	9	9	1	0	0	1.70259e+08	0	0	0	1	0
145699101	COL4A3	NOT_in_TF_list		collagen alpha-3(IV) chain precursor [Mus musculus]	7	10	1	0	0	3.9499e+06	0	0	0	1	0
133778915	HMGN5	GeneID:79366	Mus musculus	high mobility group nucleosome-binding domain-containing protein 5 [Mus musculus]	5	6	1	0	0	432832	0	0	0	1	0
114145505	HSPH1	NOT_in_TF_list		heat shock protein 105 kDa [Mus musculus]	1	1	2	0	0	1.94244e+06	0	0	1	1	0
160333189	4930534B04RIK	NOT_in_TF_list		centrosomal protein of 128 kDa [Mus musculus]	24	24	1	0	0	0	4.14476e+06	0	0	0	1
283945579	H2AFY	NOT_in_TF_list		core histone macro-H2A.1 isoform 4 [Mus musculus]	24	24	1	0	0	4.28496e+06	0	0	0	1	0
31980980	GPS2	NOT_in_TF_list		G protein pathway suppressor 2 [Mus musculus]	7	8	1	0	0	5.17584e+06	0	0	0	1	0
27369816	ENGASE	NOT_in_TF_list		cytosolic endo-beta-N-acetylglucosaminidase [Mus musculus]	12	12	2	0	0	0	0	0	0	2	0
6753556	CTSD	NOT_in_TF_list		cathepsin D precursor [Mus musculus]	9	9	2	4.16611e+06	0	1.1351e+07	0	1	0	1	0
257153454	NAMPT	NOT_in_TF_list		nicotinamide phosphoribosyltransferase [Mus musculus]	1	10	1	0	0	2.85386e+06	0	0	0	1	0
124487443	PHRF1	NOT_in_TF_list		PHD and RING finger domain-containing protein 1 [Mus musculus]	13	13	3	0	0	0	0	0	0	3	0
254939721	NEU1	NOT_in_TF_list		sialidase-1 precursor [Mus musculus]	8	8	1	0	0	0	0	0	0	0	1
158966725	2310008H09RIK	NOT_in_TF_list		lysine-rich nucleolar protein 1 isoform 1 [Mus musculus]	13	13	1	0	0	1.80432e+07	0	0	0	1	0
20589949	SDSL	NOT_in_TF_list		serine dehydratase-like [Mus musculus]	10	14	1	0	0	2.49429e+06	0	0	0	1	0
31981784	9030617O03RIK	NOT_in_TF_list		UPF0317 protein C14orf159 homolog, mitochondrial precursor [Mus musculus]	14	14	1	0	0	778301	0	0	0	1	0
343962614	MisMatch	NOT_in_TF_list		E3 ubiquitin-protein ligase Itchy [Mus musculus]	9	12	2	0	0	5.26723e+06	0	0	0	2	0
6754046	GPAA1	NOT_in_TF_list		glycosylphosphatidylinositol anchor attachment 1 protein [Mus musculus]	5	5	1	0	0	0	0	0	1	0	0
79750409	TSC1	NOT_in_TF_list		hamartin [Mus musculus]	10	10	2	0	0	0	0	0	0	2	0
226423922	COL14A1	NOT_in_TF_list		collagen alpha-1(XIV) chain precursor [Mus musculus]	1	1	4	0	0	0	0	4	0	0	0
41235752	CCDC68	NOT_in_TF_list		coiled-coil domain-containing protein 68 [Mus musculus]	27	27	1	0	0	0	0	0	0	1	0
364023817	MisMatch	NOT_in_TF_list		39S ribosomal protein L39, mitochondrial [Mus musculus]	16	16	1	0	0	3.31286e+06	0	0	0	1	0
71534247	UBN1	NOT_in_TF_list		ubinuclein-1 [Mus musculus]	7	7	1	4.99564e+06	0	0	0	1	0	0	0
114205418	DAPK1	NOT_in_TF_list		death-associated protein kinase 1 [Mus musculus]	27	27	3	1.03121e+06	0	4.02227e+06	0	2	0	1	0
146134507	YLPM1	NOT_in_TF_list		YLP motif-containing protein 1 [Mus musculus]	6	10	4	0	0	2.53893e+06	1.64961e+06	0	0	2	2
6681121	CYP4A14	NOT_in_TF_list		cytochrome P450 4A14 precursor [Mus musculus]	7	7	1	0	0	0	0	0	0	0	1
61656180	UTP18	NOT_in_TF_list		U3 small nucleolar RNA-associated protein 18 homolog [Mus musculus]	17	17	2	1.35972e+06	0	0	3.48223e+06	1	0	0	1
239937480	PIGO	NOT_in_TF_list		GPI ethanolamine phosphate transferase 3 [Mus musculus]	5	5	1	0	0	2.04787e+08	0	0	0	1	0
31982847	GAD1	NOT_in_TF_list		glutamate decarboxylase 1 [Mus musculus]	10	11	3	0	0	9.36285e+07	9.71804e+07	0	0	1	2
254911005	USH1C	NOT_in_TF_list		harmonin isoform b4 [Mus musculus]	10	10	1	0	0	0	0	0	0	0	1
121583906	MED1	NOT_in_TF_list		mediator of RNA polymerase II transcription subunit 1 isoform 2 [Mus musculus]	30	30	1	0	0	0	0	0	0	1	0
19527398	MBNL3	NOT_in_TF_list		muscleblind-like protein 3 [Mus musculus]	1	15	1	2.09767e+06	0	0	0	1	0	0	0
51921285	GIT1	NOT_in_TF_list		ARF GTPase-activating protein GIT1 [Mus musculus]	7	7	1	0	0	6.2614e+06	0	0	0	1	0
507116142	MisMatch	NOT_in_TF_list		FYN-binding protein isoform 2 [Mus musculus]	9	11	1	0	0	0	2.58552e+08	0	0	0	1
6752992	PARP2	NOT_in_TF_list		poly [ADP-ribose] polymerase 2 [Mus musculus]	2	5	1	2.62321e+06	0	0	0	1	0	0	0
6680582	KLF3	GeneID:51274	Mus musculus	Krueppel-like factor 3 [Mus musculus]	17	17	1	0	0	0	613744	0	0	0	1
56605682	SCAF1	NOT_in_TF_list		splicing factor, arginine/serine-rich 19 [Mus musculus]	4	4	1	625114	0	0	0	1	0	0	0
309267739	GM13941	NOT_in_TF_list		PREDICTED: uncharacterized protein LOC668802 [Mus musculus]	9	9	1	2.15215e+07	0	0	0	1	0	0	0
31712002	EDC4	NOT_in_TF_list		enhancer of mRNA-decapping protein 4 [Mus musculus]	22	22	2	0	0	2.31631e+06	0	0	0	2	0
31982330	GOLGA3	NOT_in_TF_list		Golgin subfamily A member 3 [Mus musculus]	2	5	4	2.12565e+07	0	2.25805e+06	0	2	0	2	0
189339278	CELF5	NOT_in_TF_list		CUG-BP- and ETR-3-like factor 5 [Mus musculus]	11	11	1	0	0	0	957544	0	0	0	1
17975508	GBE1	NOT_in_TF_list		1,4-alpha-glucan-branching enzyme [Mus musculus]	10	10	1	1.72997e+06	0	0	0	1	0	0	0
21450205	WRAP53	NOT_in_TF_list		telomerase Cajal body protein 1 [Mus musculus]	2	2	1	0	0	1.15261e+06	0	0	0	1	0
22380661	OLFR870	NOT_in_TF_list		olfactory receptor 870 [Mus musculus]	5	5	1	0	0	4.55593e+06	0	0	0	1	0
21450253	ZDHHC5	NOT_in_TF_list		palmitoyltransferase ZDHHC5 [Mus musculus]	5	8	1	0	0	0	0	0	0	0	1
125656150	HSDL2	NOT_in_TF_list		hydroxysteroid dehydrogenase-like protein 2 [Mus musculus]	11	11	1	0	0	5.02547e+06	0	0	0	1	0
440918697	MisMatch	NOT_in_TF_list		transcription intermediary factor 1-alpha isoform 3 [Mus musculus]	6	6	1	0	0	0	0	0	0	1	0
28077005	TMEM48	NOT_in_TF_list		nucleoporin NDC1 [Mus musculus]	10	11	1	0	0	0	0	0	0	1	0
238231388	WNT9B	NOT_in_TF_list		protein Wnt-9b precursor [Mus musculus]	14	14	1	0	0	4.0324e+06	0	0	0	1	0
30794454	NOB1	NOT_in_TF_list		RNA-binding protein NOB1 [Mus musculus]	10	13	1	0	0	0	3.00756e+06	0	0	0	1
22129681	OLFR1449	NOT_in_TF_list		olfactory receptor 1449 [Mus musculus]	13	13	1	0	0	3.04871e+06	0	0	0	1	0
56785426	MIER2	GeneID:54531	Mus musculus	mesoderm induction early response protein 2 [Mus musculus]	46	46	1	3.98342e+07	0	0	0	1	0	0	0
168480120	RICTOR	NOT_in_TF_list		rapamycin-insensitive companion of mTOR [Mus musculus]	2	12	3	0	0	2.09546e+06	0	0	0	3	0
119395752	KCNA1	NOT_in_TF_list		potassium voltage-gated channel subfamily A member 1 [Mus musculus]	17	20	1	0	0	0	0	1	0	0	0
210147500	CCDC9	NOT_in_TF_list		coiled-coil domain-containing protein 9 isoform 2 [Mus musculus]	4	4	1	0	0	0	1.91093e+06	0	0	0	1
229608908	1190005F20RIK	NOT_in_TF_list		TRMT1-like protein [Mus musculus]	22	22	1	0	0	1.25607e+06	0	0	0	1	0
407261968	MisMatch	NOT_in_TF_list		PREDICTED: zinc finger protein 658-like [Mus musculus]	15	15	1	0	0	0	0	0	0	1	0
188035919	GTF2H1	NOT_in_TF_list		general transcription factor IIH subunit 1 [Mus musculus]	13	13	1	0	0	0	0	0	0	1	0
111120329	COL1A2	NOT_in_TF_list		collagen alpha-2(I) chain precursor [Mus musculus]	22	23	1	0	0	1.50404e+07	0	0	0	1	0
225703058	ASCC3	NOT_in_TF_list		activating signal cointegrator 1 complex subunit 3 [Mus musculus]	13	13	5	976449	0	1.26306e+06	1.15766e+06	1	0	3	1
82880662	HSPA14	NOT_in_TF_list		heat shock 70 kDa protein 14 isoform 1 [Mus musculus]	34	36	1	0	0	2.24375e+06	0	0	0	1	0
121247453	NR3C1	GeneID:2908	Mus musculus	glucocorticoid receptor [Mus musculus]	31	31	1	0	0	508823	0	0	0	1	0
157838001	DDX42	NOT_in_TF_list		ATP-dependent RNA helicase DDX42 [Mus musculus]	8	8	1	0	0	0	800423	0	0	0	1
6752944	ABCG2	NOT_in_TF_list		ATP-binding cassette sub-family G member 2 [Mus musculus]	52	52	1	0	0	0	0	0	1	0	0
52138550	IL16	NOT_in_TF_list		pro-interleukin-16 [Mus musculus]	12	12	1	0	0	0	0	0	1	0	0
31544072	HR	NOT_in_TF_list		protein hairless [Mus musculus]	22	23	1	0	0	0	2.93546e+06	0	0	0	1
6754408	AADAT	NOT_in_TF_list		kynurenine/alpha-aminoadipate aminotransferase, mitochondrial [Mus musculus]	4	4	2	2.65161e+06	0	3.76372e+06	0	1	0	1	0
116686144	NRP2	NOT_in_TF_list		neuropilin-2 isoform 6 precursor [Mus musculus]	5	18	1	0	0	113677	0	0	0	1	0
27369748	ALDH5A1	NOT_in_TF_list		succinate-semialdehyde dehydrogenase, mitochondrial precursor [Mus musculus]	17	17	1	0	0	4739370	0	0	0	1	0
226958599	ADCY3	NOT_in_TF_list		adenylate cyclase type 3 isoform 2 [Mus musculus]	6	6	2	0	0	4.01572e+06	0	0	0	2	0
409168275	MisMatch	NOT_in_TF_list		cell division cycle 7-related protein kinase isoform 3 [Mus musculus]	3	13	2	0	0	0	2.81733e+06	0	0	0	2
6755851	TOP3B	NOT_in_TF_list		DNA topoisomerase 3-beta-1 [Mus musculus]	14	14	2	1.70539e+06	0	0	0	2	0	0	0
82524278	WWC1	NOT_in_TF_list		protein KIBRA [Mus musculus]	9	10	2	541022	0	920930	0	1	0	1	0
254939539	MYO19	NOT_in_TF_list		unconventional myosin-XIX [Mus musculus]	1	1	1	0	0	426509	0	0	0	1	0
145275191	ABCC6	NOT_in_TF_list		multidrug resistance-associated protein 6 [Mus musculus]	16	16	3	655738	0	2.19791e+06	0	2	0	1	0
92110009	SLC6A12	NOT_in_TF_list		sodium- and chloride-dependent betaine transporter [Mus musculus]	6	6	1	0	0	0	943848	0	0	0	1
257467664	FAN1	NOT_in_TF_list		fanconi-associated nuclease 1 [Mus musculus]	20	20	2	0	0	6.19171e+06	0	0	0	2	0
70887784	SPAG9	NOT_in_TF_list		C-Jun-amino-terminal kinase-interacting protein 4 isoform 4 [Mus musculus]	12	13	2	0	0	0	0	2	0	0	0
46402267	ANKRD34C	NOT_in_TF_list		ankyrin repeat domain-containing protein 34C [Mus musculus]	6	6	1	0	0	0	1.45484e+07	0	0	0	1
7305241	LRRC23	NOT_in_TF_list		leucine-rich repeat-containing protein 23 [Mus musculus]	6	6	1	0	0	0	2.61403e+07	0	0	0	1
19527184	TAF5L	NOT_in_TF_list		TAF5-like RNA polymerase II p300/CBP-associated factor-associated factor 65 kDa subunit 5L [Mus musculus]	6	6	2	0	0	1.3932e+06	530860	0	0	1	1
144922638	KTN1	NOT_in_TF_list		kinectin [Mus musculus]	10	10	2	0	0	2.25729e+06	0	0	0	2	0
189409138	CAND1	NOT_in_TF_list		cullin-associated NEDD8-dissociated protein 1 [Mus musculus]	6	6	2	1.00705e+06	0	0	0	1	0	1	0
27369597	A330021E22RIK	NOT_in_TF_list		uncharacterized protein C7orf63 homolog [Mus musculus]	20	20	2	0	0	264095	0	0	0	2	0
226443061	USP31	NOT_in_TF_list		ubiquitin specific protease 31 [Mus musculus]	13	13	1	0	0	0	0	0	0	1	0
11612511	MLLT1	NOT_in_TF_list		protein ENL [Mus musculus]	6	6	3	0	0	5.08188e+06	3.91791e+06	0	0	1	2
309270935	SYNGAP1	NOT_in_TF_list		PREDICTED: ras GTPase-activating protein SynGAP [Mus musculus]	11	11	1	0	0	0	0	0	0	0	1
46447825	KLHL24	NOT_in_TF_list		kelch-like protein 24 [Mus musculus]	11	12	1	0	0	541398	0	0	0	1	0
257467604	GPD1L	NOT_in_TF_list		glycerol-3-phosphate dehydrogenase 1-like protein [Mus musculus]	11	11	1	4.07517e+06	0	0	0	1	0	0	0
124053443	AMBRA1	NOT_in_TF_list		activating molecule in BECN1-regulated autophagy protein 1 isoform 2 [Mus musculus]	9	9	1	0	0	1.11032e+06	0	0	0	1	0
30725764	PLD4	NOT_in_TF_list		phospholipase D4 [Mus musculus]	4	4	1	0	0	0	3.12706e+07	0	0	0	1
85861229	GTF3C2	NOT_in_TF_list		general transcription factor 3C polypeptide 2 [Mus musculus]	9	10	2	0	0	2.76809e+06	636397	0	0	1	1
116812875	SECISBP2	NOT_in_TF_list		selenocysteine insertion sequence-binding protein 2 [Mus musculus]	5	5	2	0	0	619040	0	0	1	1	0
169403965	SHANK2	NOT_in_TF_list		SH3 and multiple ankyrin repeat domains protein 2 isoform b [Mus musculus]	14	14	1	401094	0	0	0	1	0	0	0
311893382	DYNC1I2	NOT_in_TF_list		cytoplasmic dynein 1 intermediate chain 2 isoform 5 [Mus musculus]	18	18	3	0	0	1.86455e+06	1.01716e+06	0	0	2	1
190194401	DOCK9	NOT_in_TF_list		dedicator of cytokinesis protein 9 isoform 4 [Mus musculus]	18	18	2	0	0	4.60239e+07	0	0	0	2	0
162287131	MTAP1S	NOT_in_TF_list		microtubule-associated protein 1S [Mus musculus]	5	5	2	527982	0	0	867923	1	0	0	1
31560168	ATAD1	NOT_in_TF_list		ATPase family AAA domain-containing protein 1 [Mus musculus]	6	6	1	0	0	2.87084e+06	0	0	0	1	0
112799851	TRP53BP2	NOT_in_TF_list		apoptosis-stimulating of p53 protein 2 [Mus musculus]	2	2	2	0	0	802103	996967	0	0	1	1
242397444	FAM84B	NOT_in_TF_list		uncharacterized protein LOC399603 [Mus musculus]	2	4	2	1.93227e+06	0	0	0	1	0	1	0
124486662	1110014N23RIK	NOT_in_TF_list		vacuolar protein sorting-associated protein 51 homolog [Mus musculus]	1	1	3	989985	0	0	544390	1	0	1	1
226246593	ACTR10	NOT_in_TF_list		actin-related protein 10 [Mus musculus]	18	18	1	1.01978e+06	0	0	0	1	0	0	0
13385296	BZW1	GeneID:9689	-	basic leucine zipper and W2 domain-containing protein 1 [Mus musculus]	9	9	1	0	0	2.42801e+06	0	0	0	1	0
68303650	MPHOSPH10	NOT_in_TF_list		U3 small nucleolar ribonucleoprotein protein MPP10 [Mus musculus]	17	17	1	0	0	3.6727e+06	0	0	0	1	0
356460937	MisMatch	NOT_in_TF_list		leucine-rich repeat and calponin homology domain-containing protein 1 isoform 2 [Mus musculus]	7	7	1	1252319	0	0	0	1	0	0	0
254281313	AP3M1	NOT_in_TF_list		AP-3 complex subunit mu-1 [Mus musculus]	5	5	1	0	0	0	3.49842e+06	0	0	0	1
27734130	FAM110B	NOT_in_TF_list		protein FAM110B [Mus musculus]	33	33	1	0	0	6.89641e+06	0	0	0	1	0
6755288	RASGRF1	NOT_in_TF_list		ras-specific guanine nucleotide-releasing factor 1 isoform 1 [Mus musculus]	6	6	1	0	0	0	3.58111e+06	0	0	0	1
67188876	CEBPZ	GeneID:10153	Mus musculus	CCAAT/enhancer-binding protein zeta [Mus musculus]	14	14	2	742434	0	1.88465e+06	0	1	0	1	0
334358889	MisMatch	NOT_in_TF_list		ataxin-1 isoform b [Mus musculus]	8	8	2	0	0	801689	1.19225e+06	0	0	1	1
133506756	PJA1	NOT_in_TF_list		E3 ubiquitin-protein ligase Praja-1 isoform 1 [Mus musculus]	3	3	1	0	0	6.46868e+06	0	0	0	1	0
254675249	SMAD3	GeneID:4088	Mus musculus	mothers against decapentaplegic homolog 3 [Mus musculus]	10	10	1	0	0	0	1.6724e+06	0	0	0	1
13385246	DUOXA2	NOT_in_TF_list		dual oxidase maturation factor 2 [Mus musculus]	9	10	1	0	0	0	584581	0	0	0	1
166295177	SYT3	NOT_in_TF_list		synaptotagmin-3 [Mus musculus]	34	35	1	0	0	0	602330	0	0	0	1
13385358	CDK5RAP1	NOT_in_TF_list		CDK5 regulatory subunit-associated protein 1 [Mus musculus]	4	4	1	0	0	1.54261e+06	0	0	0	1	0
134949047	GPR111	NOT_in_TF_list		G protein-coupled receptor 111 precursor [Mus musculus]	9	9	1	0	0	0	0	1	0	0	0
157041252	PLIN4	NOT_in_TF_list		perilipin-4 [Mus musculus]	9	12	1	0	0	0	0	0	0	1	0
29244066	F830045P16RIK	NOT_in_TF_list		uncharacterized protein LOC228592 [Mus musculus]	6	6	1	2.73918e+06	0	0	0	1	0	0	0
150378501	CPD	NOT_in_TF_list		carboxypeptidase D precursor [Mus musculus]	7	7	1	0	0	0	0	1	0	0	0
244790133	ARHGAP4	NOT_in_TF_list		Rho GTPase activating protein 4 isoform 3 [Mus musculus]	24	24	1	0	0	0	0	0	1	0	0
269954679	QARS	NOT_in_TF_list		glutaminyl-tRNA synthetase isoform 2 [Mus musculus]	10	15	1	0	0	3.40326e+06	0	0	0	1	0
10242373	MCM7	NOT_in_TF_list		DNA replication licensing factor MCM7 [Mus musculus]	3	10	1	0	0	878760	0	0	0	1	0
113205055	SKI	GeneID:6497	Mus musculus	ski oncogene [Mus musculus]	9	9	1	2.31743e+06	0	0	0	1	0	0	0
21450111	EML3	NOT_in_TF_list		echinoderm microtubule-associated protein-like 3 [Mus musculus]	9	9	1	0	0	0	402181	0	0	0	1
227908784	EFTUD1	NOT_in_TF_list		elongation factor Tu GTP-binding domain-containing protein 1 [Mus musculus]	16	16	1	0	0	0	4.07841e+07	0	0	0	1
258613856	STK31	NOT_in_TF_list		serine/threonine-protein kinase 31 [Mus musculus]	13	13	1	0	0	1.11701e+07	0	0	0	1	0
34610207	AARS	NOT_in_TF_list		alanine--tRNA ligase, cytoplasmic [Mus musculus]	10	13	1	0	0	0	0	0	0	1	0
295317407	RAPGEF3	NOT_in_TF_list		rap guanine nucleotide exchange factor 3 isoform 3 [Mus musculus]	14	14	1	1.53371e+06	0	0	0	1	0	0	0
30520273	TMEM117	NOT_in_TF_list		transmembrane protein 117 [Mus musculus]	5	6	1	0	0	0	0	0	0	0	1
124378037	SON	NOT_in_TF_list		protein SON truncated isoform [Mus musculus]	27	27	3	1.08234e+06	0	1.05382e+06	0	1	0	2	0
26986581	SNX8	NOT_in_TF_list		sorting nexin-8 [Mus musculus]	3	3	1	0	0	1.79376e+06	0	0	0	1	0
33468897	GCLC	NOT_in_TF_list		glutamate--cysteine ligase catalytic subunit [Mus musculus]	1	7	1	0	0	0	0	0	1	0	0
24418931	DNTTIP2	NOT_in_TF_list		deoxynucleotidyltransferase terminal-interacting protein 2 [Mus musculus]	17	17	3	1.16051e+07	0	0	0	3	0	0	0
84370361	NID2	NOT_in_TF_list		nidogen-2 precursor [Mus musculus]	14	14	1	0	0	0	0	0	0	0	1
13385970	TCTN2	NOT_in_TF_list		tectonic-2 precursor [Mus musculus]	27	27	1	5.4178e+07	0	0	0	1	0	0	0
56699430	FGD5	NOT_in_TF_list		FYVE, RhoGEF and PH domain-containing protein 5 [Mus musculus]	6	6	4	0	0	0	0	0	4	0	0
124244060	AHDC1	NOT_in_TF_list		AT-hook DNA-binding motif-containing protein 1 [Mus musculus]	10	12	2	0	0	0	0	2	0	0	0
198278549	4930443G12RIK	NOT_in_TF_list		solute carrier family 25, member 54 [Mus musculus]	5	5	1	0	0	3.21475e+07	0	0	0	1	0
6680117	GSS	NOT_in_TF_list		glutathione synthetase [Mus musculus]	12	14	1	361879	0	0	0	1	0	0	0
34328195	PTPN12	NOT_in_TF_list		tyrosine-protein phosphatase non-receptor type 12 [Mus musculus]	18	18	1	0	0	280847	0	0	0	1	0
118130807	PNPLA8	NOT_in_TF_list		calcium-independent phospholipase A2-gamma [Mus musculus]	68	68	1	505644	0	0	0	1	0	0	0
124487073	IRS2	NOT_in_TF_list		insulin receptor substrate 2 [Mus musculus]	20	21	2	0	0	1.54099e+06	0	0	0	2	0
87239996	IVNS1ABP	NOT_in_TF_list		influenza virus NS1A-binding protein homolog isoform 3 [Mus musculus]	11	12	1	1.21151e+08	0	0	0	1	0	0	0
31982712	CPB2	NOT_in_TF_list		carboxypeptidase B2 precursor [Mus musculus]	6	6	1	0	0	240959761	0	0	0	1	0
112807171	EML1	NOT_in_TF_list		echinoderm microtubule-associated protein-like 1 isoform 2 [Mus musculus]	12	12	1	0	0	0	2.0488e+08	0	0	0	1
30424575	WDR24	NOT_in_TF_list		WD repeat-containing protein 24 [Mus musculus]	1	1	1	0	0	1.0909e+06	0	0	0	1	0
269954704	HAUS4	NOT_in_TF_list		HAUS augmin-like complex subunit 4 [Mus musculus]	3	3	1	0	0	0	1.70761e+09	0	0	0	1
349732093	MisMatch	NOT_in_TF_list		CUGBP Elav-like family member 1 isoform 2 [Mus musculus]	6	6	1	2.8044e+06	0	0	0	1	0	0	0
39930555	BMS1	NOT_in_TF_list		ribosome biogenesis protein BMS1 homolog [Mus musculus]	10	11	2	0	0	4.12731e+06	609093	0	0	1	1
261862272	F13A1	NOT_in_TF_list		coagulation factor XIII A chain precursor [Mus musculus]	15	15	1	0	0	6.14912e+06	0	0	0	1	0
131889848	TC2N	NOT_in_TF_list		tandem C2 domains nuclear protein [Mus musculus]	19	19	1	0	0	627569	0	0	0	1	0
253314527	SESN1	NOT_in_TF_list		sestrin-1 isoform 2 [Mus musculus]	8	8	1	0	0	0	0	0	0	1	0
253314487	CARD6	NOT_in_TF_list		caspase recruitment domain family, member 6 [Mus musculus]	6	6	1	0	0	2.07761e+06	0	0	0	1	0
78191789	DOCK7	NOT_in_TF_list		dedicator of cytokinesis protein 7 [Mus musculus]	6	14	3	612895	0	317549	0	2	0	1	0
225690556	GFM2	NOT_in_TF_list		ribosome-releasing factor 2, mitochondrial isoform 2 [Mus musculus]	1	1	1	0	0	440310	0	0	0	1	0
124486829	ARHGEF26	NOT_in_TF_list		rho guanine nucleotide exchange factor 26 [Mus musculus]	2	18	1	0	0	0	0	0	0	0	1
226371684	ADAR	NOT_in_TF_list		double-stranded RNA-specific adenosine deaminase isoform 2 [Mus musculus]	35	42	1	0	0	0	0	0	1	0	0
255759880	LMX1B	GeneID:4010	Mus musculus	LIM homeobox transcription factor 1-beta [Mus musculus]	18	18	2	0	0	5.02041e+06	0	0	1	1	0
124301227	NOC2L	NOT_in_TF_list		nucleolar complex protein 2 homolog [Mus musculus]	33	33	2	130214	0	0	0	1	1	0	0
27369936	KCTD3	NOT_in_TF_list		BTB/POZ domain-containing protein KCTD3 [Mus musculus]	11	11	1	0	0	3.45438e+06	0	0	0	1	0
113374158	CDSN	NOT_in_TF_list		corneodesmosin precursor [Mus musculus]	7	20	1	3.47174e+06	0	0	0	1	0	0	0
308210768	SLC4A4	NOT_in_TF_list		electrogenic sodium bicarbonate cotransporter 1 isoform c [Mus musculus]	4	4	1	0	0	2.34495e+06	0	0	0	1	0
244790104	FBXO10	NOT_in_TF_list		F-box only protein 10 [Mus musculus]	7	7	2	0	0	0	0	1	0	0	1
83523742	WDR75	NOT_in_TF_list		WD repeat-containing protein 75 [Mus musculus]	10	10	1	810749	0	0	0	1	0	0	0
6671762	CKM	NOT_in_TF_list		creatine kinase M-type [Mus musculus]	24	25	1	0	0	3.09755e+06	0	0	0	1	0
116256447	ELL2	NOT_in_TF_list		RNA polymerase II elongation factor ELL2 [Mus musculus]	21	21	1	0	0	0	2.06377e+06	0	0	0	1
171184441	4732471D19RIK	NOT_in_TF_list		uncharacterized protein LOC319719 [Mus musculus]	6	6	1	0	0	0	0	1	0	0	0
58037377	LRRC15	NOT_in_TF_list		leucine-rich repeat-containing protein 15 precursor [Mus musculus]	10	10	1	0	0	0	8.27448e+06	0	0	0	1
327315389	CNOT1	NOT_in_TF_list		CCR4-NOT transcription complex subunit 1 isoform 1 [Mus musculus]	2	5	3	0	0	1.30272e+06	0	0	0	3	0
109255224	CABYR	NOT_in_TF_list		calcium-binding tyrosine phosphorylation-regulated protein isoform a [Mus musculus]	32	45	1	0	0	1.19623e+09	0	0	0	1	0
39930339	KDM2B	NOT_in_TF_list		lysine-specific demethylase 2B isoform 2 [Mus musculus]	1	6	1	0	0	2.27586e+07	0	0	0	1	0
154350222	SUPT16H	NOT_in_TF_list		FACT complex subunit SPT16 [Mus musculus]	17	17	1	0	0	0	0	1	0	0	0
37595742	ZMYM2	NOT_in_TF_list		zinc finger MYM-type protein 2 [Mus musculus]	13	13	2	0	0	1.57682e+06	0	0	0	2	0
34328467	RIPK1	NOT_in_TF_list		receptor-interacting serine/threonine-protein kinase 1 [Mus musculus]	8	8	1	0	0	0	0	0	0	1	0
161353494	CBFA2T2	NOT_in_TF_list		protein CBFA2T2 isoform 2 [Mus musculus]	4	4	1	0	0	1.83684e+06	0	0	0	1	0
13384648	BTD	NOT_in_TF_list		biotinidase precursor [Mus musculus]	19	34	1	8.3365e+06	0	0	0	1	0	0	0
227330565	CTNNAL1	NOT_in_TF_list		alpha-catulin [Mus musculus]	27	41	1	0	0	0	0	0	1	0	0
153792501	GRID1	NOT_in_TF_list		glutamate receptor ionotropic, delta-1 precursor [Mus musculus]	5	5	1	0	0	0	0	0	1	0	0
46519149	HEATR1	NOT_in_TF_list		BAP28 protein [Mus musculus]	5	5	4	1.46423e+06	0	3.48921e+06	1.57149e+06	1	0	2	1
227116320	FKBP15	NOT_in_TF_list		FK506-binding protein 15 [Mus musculus]	1	1	1	0	0	808778	0	0	0	1	0
269784768	TEX11	NOT_in_TF_list		testis-expressed sequence 11 protein isoform 1 [Mus musculus]	9	9	1	2.01939e+06	0	0	0	1	0	0	0
334724453	MisMatch	NOT_in_TF_list		cdc42-interacting protein 4 isoform 4 [Mus musculus]	6	7	1	0	0	595863	0	0	0	1	0
126116567	NEURL1B	NOT_in_TF_list		E3 ubiquitin-protein ligase NEURL1B [Mus musculus]	6	12	1	0	0	0	0	0	0	1	0
402691983	MisMatch	NOT_in_TF_list		gamma-aminobutyric acid receptor subunit rho-1 precursor [Mus musculus]	6	7	1	0	0	0	32420549	0	0	0	1
111185930	TMPRSS13	NOT_in_TF_list		transmembrane protease serine 13 [Mus musculus]	8	8	1	7.18848e+07	0	0	0	1	0	0	0
407262341	MisMatch	NOT_in_TF_list		PREDICTED: WW domain-containing adapter protein with coiled-coil-like isoform 5 [Mus musculus]	5	5	1	0	0	0	737441	0	0	0	1
406353182	MisMatch	NOT_in_TF_list		nucleolar protein 8 [Mus musculus]	12	12	1	0	0	2.50745e+07	0	0	0	1	0
269308211	MAU2	NOT_in_TF_list		MAU2 chromatid cohesion factor homolog isoform 2 [Mus musculus]	16	22	1	0	0	0	0	0	1	0	0
282396060	RCBTB2	NOT_in_TF_list		RCC1 and BTB domain-containing protein 2 [Mus musculus]	4	4	1	5.14779e+06	0	0	0	1	0	0	0
31981920	FTSJD1	NOT_in_TF_list		ftsJ methyltransferase domain-containing protein 1 [Mus musculus]	1	17	1	0	0	843364	0	0	0	1	0
225007602	MisMatch	NOT_in_TF_list		Zinc finger protein 212 isoform 2 [Mus musculus]	7	12	1	1.68491e+06	0	0	0	1	0	0	0
188035869	HERC3	NOT_in_TF_list		hect domain and RLD 3 [Mus musculus]	5	11	1	1.43454e+06	0	0	0	1	0	0	0
27261818	DNAJC16	NOT_in_TF_list		dnaJ homolog subfamily C member 16 precursor [Mus musculus]	12	12	1	0	0	1.10477e+06	0	0	0	1	0
6678185	SURF6	NOT_in_TF_list		surfeit locus protein 6 [Mus musculus]	8	8	1	0	0	2.61111e+06	0	0	0	1	0
34328385	PRRC2B	NOT_in_TF_list		protein PRRC2B isoform 2 [Mus musculus]	26	30	2	1.19042e+06	0	2.08415e+06	0	1	0	1	0
111038126	TBC1D2	NOT_in_TF_list		TBC1 domain family member 2A [Mus musculus]	16	16	2	9.5874e+06	0	8.34674e+06	0	1	0	1	0
46810282	PIK3C2G	NOT_in_TF_list		phosphatidylinositol 4-phosphate 3-kinase C2 domain-containing subunit gamma isoform 1 [Mus musculus]	6	6	1	0	0	5.66744e+06	0	0	0	1	0
6681115	CYP3A13	NOT_in_TF_list		cytochrome P450 3A13 [Mus musculus]	10	13	1	0	0	780118	0	0	0	1	0
119360344	GRAMD1A	NOT_in_TF_list		GRAM domain-containing protein 1A [Mus musculus]	9	9	1	2.51397e+07	0	0	0	1	0	0	0
110625866	MTIF2	NOT_in_TF_list		translation initiation factor IF-2, mitochondrial precursor [Mus musculus]	16	16	2	0	0	2.28291e+06	1.65393e+06	0	0	1	1
90403595	ABCC3	NOT_in_TF_list		canalicular multispecific organic anion transporter 2 [Mus musculus]	17	23	2	0	0	2.40744e+06	0	0	0	2	0
27734996	ZFYVE16	NOT_in_TF_list		zinc finger FYVE domain-containing protein 16 [Mus musculus]	8	8	1	1.25494e+07	0	0	0	1	0	0	0
157841168	CCNK	NOT_in_TF_list		cyclin-K [Mus musculus]	15	17	1	0	0	0	2.33591e+06	0	0	0	1
18390325	CXXC1	NOT_in_TF_list		cpG-binding protein [Mus musculus]	14	14	1	0	0	0	1.18593e+06	0	0	0	1
26024211	RFWD2	NOT_in_TF_list		E3 ubiquitin-protein ligase RFWD2 [Mus musculus]	12	13	1	0	0	1.27596e+06	0	0	0	1	0
157824204	CDK12	NOT_in_TF_list		cyclin-dependent kinase 12 isoform 3 [Mus musculus]	12	12	1	0	0	4.7124e+06	0	0	0	1	0
146134379	KRT9	NOT_in_TF_list		keratin, type I cytoskeletal 9 [Mus musculus]	8	8	1	0	0	0	3.22964e+06	0	0	0	1
124486835	PRRC2C	NOT_in_TF_list		protein PRRC2C [Mus musculus]	22	22	3	0	0	1.71068e+06	0	0	0	2	1
118130771	PTPN6	NOT_in_TF_list		tyrosine-protein phosphatase non-receptor type 6 isoform a [Mus musculus]	5	6	1	0	0	1.09531e+07	0	0	0	1	0
31543349	NSF	NOT_in_TF_list		vesicle-fusing ATPase [Mus musculus]	8	8	1	1.1974e+06	0	0	0	1	0	0	0
6754798	NCF2	NOT_in_TF_list		neutrophil cytosol factor 2 [Mus musculus]	2	2	1	5.01902e+06	0	0	0	1	0	0	0
40254514	GAPVD1	NOT_in_TF_list		GTPase-activating protein and VPS9 domain-containing protein 1 [Mus musculus]	13	13	1	0	0	0	0	0	0	1	0
227908803	NOMO1	NOT_in_TF_list		nodal modulator 1 precursor [Mus musculus]	6	6	1	0	0	0	0	0	0	1	0
254692909	TTF2	NOT_in_TF_list		transcription termination factor 2 [Mus musculus]	8	8	2	732877	0	0	363256	1	0	0	1
303523272	ECT2L	NOT_in_TF_list		epithelial cell transforming sequence 2 oncogene-like [Mus musculus]	1	8	1	0	0	0	0	0	1	0	0
56699478	ATP2B3	NOT_in_TF_list		plasma membrane calcium ATPase 3 [Mus musculus]	14	14	1	0	0	0	0	0	0	1	0
258613896	SNX25	NOT_in_TF_list		sorting nexin-25 [Mus musculus]	25	25	1	0	0	0	0	1	0	0	0
401871080	MisMatch	NOT_in_TF_list		E3 ubiquitin-protein ligase MIB2 isoform 2 [Mus musculus]	7	7	1	0	0	3.66405e+06	0	0	0	1	0
160333877	KIF1A	NOT_in_TF_list		kinesin-like protein KIF1A isoform b [Mus musculus]	5	5	3	1.23581e+06	0	3.30184e+06	2.9559e+06	1	0	1	1
254588108	ZCCHC6	NOT_in_TF_list		terminal uridylyltransferase 7 [Mus musculus]	3	3	1	4.78694e+07	0	0	0	1	0	0	0
68448515	CDC16	NOT_in_TF_list		cell division cycle protein 16 homolog [Mus musculus]	13	13	1	502238	0	0	0	1	0	0	0
34536815	PPP6R1	NOT_in_TF_list		serine/threonine-protein phosphatase 6 regulatory subunit 1 [Mus musculus]	11	11	1	0	0	0	0	0	0	1	0
6753236	CACNA2D3	NOT_in_TF_list		voltage-dependent calcium channel subunit alpha-2/delta-3 precursor [Mus musculus]	7	7	1	0	0	0	0	0	1	0	0
114158683	AGTPBP1	NOT_in_TF_list		cytosolic carboxypeptidase 1 isoform 2 [Mus musculus]	21	23	1	0	0	7.49768e+06	0	0	0	1	0
114145573	USP29	NOT_in_TF_list		ubiquitin carboxyl-terminal hydrolase 29 [Mus musculus]	23	24	1	0	0	1.0639e+06	0	0	0	1	0
256985174	ASZ1	NOT_in_TF_list		ankyrin repeat, SAM and basic leucine zipper domain-containing protein 1 [Mus musculus]	7	10	1	9.80815e+06	0	0	0	1	0	0	0
31980729	RASAL1	NOT_in_TF_list		rasGAP-activating-like protein 1 [Mus musculus]	14	14	1	0	0	2.3401e+07	0	0	0	1	0
28893359	MICAL2	NOT_in_TF_list		protein-methionine sulfoxide oxidase MICAL2 isoform B [Mus musculus]	9	10	1	0	0	1.49611e+06	0	0	0	1	0
61676215	RASIP1	NOT_in_TF_list		ras-interacting protein 1 [Mus musculus]	6	6	1	0	0	8.05908e+06	0	0	0	1	0
114326510	ROS1	NOT_in_TF_list		proto-oncogene tyrosine-protein kinase ROS precursor [Mus musculus]	18	18	1	0	0	0	0	0	0	1	0
111185905	EVI5	NOT_in_TF_list		ecotropic viral integration site 5 protein [Mus musculus]	19	19	1	0	0	3.20733e+06	0	0	0	1	0
134288882	COL15A1	NOT_in_TF_list		collagen alpha-1(XV) chain precursor [Mus musculus]	8	8	1	0	0	0	0	0	0	0	1
13878227	WDR6	NOT_in_TF_list		WD repeat-containing protein 6 [Mus musculus]	1	4	1	0	0	420995	0	0	0	1	0
356582266	MisMatch	NOT_in_TF_list		mitogen-activated protein kinase kinase kinase kinase 4 isoform 3 [Mus musculus]	1	1	1	219941	0	0	0	1	0	0	0
140969817	BPTF	GeneID:2186	Homo sapiens	nucleosome-remodeling factor subunit BPTF [Mus musculus]	3	10	1	0	0	0	4.99694e+07	0	0	0	1
407262435	MisMatch	NOT_in_TF_list		PREDICTED: cohesin subunit SA-2-like [Mus musculus]	20	20	2	160732	0	0	0	1	1	0	0
194353999	HDAC6	NOT_in_TF_list		histone deacetylase 6 [Mus musculus]	2	4	2	309505	0	0	0	1	0	1	0
124378030	GOLGA2	NOT_in_TF_list		Golgin subfamily A member 2 isoform b [Mus musculus]	4	4	1	528678	0	0	0	1	0	0	0
31542445	CYP7A1	NOT_in_TF_list		cholesterol 7-alpha-monooxygenase [Mus musculus]	6	6	1	0	0	0	0	1	0	0	0
27370292	OLFML2A	NOT_in_TF_list		olfactomedin-like protein 2A precursor [Mus musculus]	11	11	1	0	0	795325	0	0	0	1	0
282165737	VPS41	NOT_in_TF_list		vacuolar protein sorting-associated protein 41 homolog [Mus musculus]	4	4	1	0	0	0	0	0	0	1	0
52350563	GPR158	NOT_in_TF_list		probable G-protein coupled receptor 158 precursor [Mus musculus]	7	12	1	2.60295e+06	0	0	0	1	0	0	0
254588041	VPS33A	NOT_in_TF_list		vacuolar protein sorting-associated protein 33A [Mus musculus]	9	9	1	0	0	0	1.36853e+06	0	0	0	1
155722992	SLC4A1AP	NOT_in_TF_list		solute carrier family 4 (anion exchanger), member 1, adaptor protein [Mus musculus]	8	8	1	0	0	3.49307e+06	0	0	0	1	0
191252808	RIMBP3	NOT_in_TF_list		RIMS-binding protein 3 [Mus musculus]	4	5	1	0	0	1.14966e+06	0	0	0	1	0
357588410	MisMatch	NOT_in_TF_list		matrilin-4 precursor [Mus musculus]	7	7	1	0	0	9624439	0	0	0	1	0
110835729	CUX1	GeneID:1523	Mus musculus	protein CASP isoform a [Mus musculus]	16	17	2	0	0	730045	1.0097e+06	0	0	1	1
226246640	BRD4	NOT_in_TF_list		bromodomain-containing protein 4 isoform 2 [Mus musculus]	4	7	1	0	0	2.53164e+06	0	0	0	1	0
377836229	MisMatch	NOT_in_TF_list		PREDICTED: putative uncharacterized protein C8orf73 [Mus musculus]	7	7	1	6.75806e+06	0	0	0	1	0	0	0
42734447	BMP1	NOT_in_TF_list		bone morphogenetic protein 1 precursor [Mus musculus]	8	8	1	0	0	4.05155e+06	0	0	0	1	0
122937353	FLT3	NOT_in_TF_list		receptor-type tyrosine-protein kinase FLT3 precursor [Mus musculus]	4	4	1	2.94804e+06	0	0	0	1	0	0	0
254750662	JAKMIP2	NOT_in_TF_list		janus kinase and microtubule interacting protein 2 [Mus musculus]	1	1	1	0	0	0	1.78562e+06	0	0	0	1
40556366	LRSAM1	NOT_in_TF_list		E3 ubiquitin-protein ligase LRSAM1 [Mus musculus]	7	7	2	0	0	5.62378e+06	3.28932e+06	0	0	1	1
160333073	INSRR	NOT_in_TF_list		insulin receptor-related protein precursor [Mus musculus]	4	4	8	9.95687e+06	0	1.16325e+07	1.34156e+07	2	1	3	2
254675212	DENND1A	NOT_in_TF_list		DENN domain-containing protein 1A [Mus musculus]	2	2	1	0	0	0	0	0	1	0	0
170014698	CUL2	NOT_in_TF_list		cullin-2 [Mus musculus]	4	4	1	0	0	0	752073	0	0	0	1
163937858	RBBP6	NOT_in_TF_list		E3 ubiquitin-protein ligase RBBP6 isoform 1 [Mus musculus]	16	16	2	0	0	864270	1.41318e+06	0	0	1	1
328887946	MisMatch	NOT_in_TF_list		piezo-type mechanosensitive ion channel component 2 [Mus musculus]	5	5	4	0	0	0	0	0	4	0	0
148536851	CCDC87	NOT_in_TF_list		coiled-coil domain-containing protein 87 [Mus musculus]	3	3	1	2.17845e+07	0	0	0	1	0	0	0
188219585	PRKG2	NOT_in_TF_list		cGMP-dependent protein kinase 2 [Mus musculus]	7	7	1	0	0	0	1.08396e+06	0	0	0	1
126366001	ZBTB48	GeneID:3104	Mus musculus	zinc finger and BTB domain-containing protein 48 [Mus musculus]	5	5	1	1175963	0	0	0	1	0	0	0
124487105	ARID4A	NOT_in_TF_list		AT-rich interactive domain-containing protein 4A [Mus musculus]	6	6	3	4.76496e+07	0	0	0	1	0	0	2
269914109	PIK3CB	NOT_in_TF_list		phosphatidylinositol 4,5-bisphosphate 3-kinase catalytic subunit beta isoform [Mus musculus]	13	13	1	0	0	3.45843e+06	0	0	0	1	0
459215035	MisMatch	NOT_in_TF_list		fer-1-like 5 [Mus musculus]	7	11	1	0	0	6.30447e+06	0	0	0	1	0
124487283	UPF2	NOT_in_TF_list		regulator of nonsense transcripts 2 [Mus musculus]	11	11	3	0	0	1.22446e+06	863632	0	0	2	1
62243588	UNC13D	NOT_in_TF_list		protein unc-13 homolog D [Mus musculus]	6	7	1	0	0	0	0	0	1	0	0
336020351	MisMatch	NOT_in_TF_list		nuclear receptor coactivator 6 isoform 2 [Mus musculus]	3	3	1	0	0	0	273110	0	0	0	1
255683322	GPR128	NOT_in_TF_list		probable G-protein coupled receptor 128 precursor [Mus musculus]	4	4	1	0	0	0	1.2535e+07	0	0	0	1
255759883	POLR3E	NOT_in_TF_list		DNA-directed RNA polymerase III subunit RPC5 isoform 2 [Mus musculus]	7	7	1	0	0	437707	0	0	0	1	0
282847448	KRIT1	NOT_in_TF_list		krev interaction trapped protein 1 isoform 2 [Mus musculus]	16	18	1	0	0	0	433358	0	0	0	1
282165827	CDHR2	NOT_in_TF_list		protocadherin 24 precursor [Mus musculus]	12	12	1	0	0	0	9.77567e+06	0	0	0	1
165377130	ZFP276	GeneID:92822	Mus musculus	zinc finger protein 276 [Mus musculus]	20	20	1	0	0	2.35835e+06	0	0	0	1	0
227908800	WDR11	NOT_in_TF_list		WD repeat-containing protein 11 [Mus musculus]	1	5	1	0	0	1.83401e+06	0	0	0	1	0
145966792	RBM33	NOT_in_TF_list		RNA-binding protein 33 [Mus musculus]	4	4	1	0	0	0	0	1	0	0	0
21313534	NADSYN1	NOT_in_TF_list		glutamine-dependent NAD(+) synthetase [Mus musculus]	4	4	1	0	0	1.67187e+07	0	0	0	1	0
247494016	4930422G04RIK	NOT_in_TF_list		uncharacterized protein C4orf21 homolog [Mus musculus]	8	8	1	0	0	0	0	0	1	0	0
31980873	VPS53	NOT_in_TF_list		vacuolar protein sorting-associated protein 53 homolog [Mus musculus]	4	4	1	0	0	1.7479e+06	0	0	0	1	0
94421034	EP300	NOT_in_TF_list		histone acetyltransferase p300 [Mus musculus]	10	10	1	0	0	0	0	1	0	0	0
124249084	2210018M11RIK	NOT_in_TF_list		protein EMSY [Mus musculus]	11	11	1	0	0	513027	0	0	0	1	0
291327470	ITPR1	NOT_in_TF_list		inositol 1,4,5-trisphosphate receptor type 1 [Mus musculus]	3	3	1	0	0	1.36541e+07	0	0	0	1	0
472235285	MisMatch	NOT_in_TF_list		glutamate receptor-interacting protein 1 isoform 7 [Mus musculus]	7	14	1	0	0	1.12724e+06	0	0	0	1	0
51243036	OSBPL8	NOT_in_TF_list		oxysterol-binding protein-like protein 8 isoform b [Mus musculus]	8	9	1	0	0	0	0	0	1	0	0
247494234	DNAJC13	NOT_in_TF_list		DnaJ (Hsp40) homolog, subfamily C, member 13 [Mus musculus]	6	6	2	0	0	890839	0	0	0	2	0
161016788	NINL	NOT_in_TF_list		ninein-like protein [Mus musculus]	4	4	1	0	0	315157	0	0	0	1	0
254692954	SETDB1	NOT_in_TF_list		histone-lysine N-methyltransferase SETDB1 isoform b [Mus musculus]	30	30	1	0	0	0	5.39879e+06	0	0	0	1
261862307	TNFAIP3	NOT_in_TF_list		tumor necrosis factor alpha-induced protein 3 isoform 1 [Mus musculus]	23	23	1	0	0	0	1.26706e+06	0	0	0	1
110626029	FAM193B	NOT_in_TF_list		protein FAM193B [Mus musculus]	2	4	3	0	0	1.08974e+08	2.67559e+07	0	0	1	2
124487201	1300001I01RIK	NOT_in_TF_list		clustered mitochondria protein homolog [Mus musculus]	4	4	1	0	0	0	0	0	0	1	0
51491852	MARS	NOT_in_TF_list		methionine--tRNA ligase, cytoplasmic isoform 2 [Mus musculus]	6	6	1	0	0	2.99252e+06	0	0	0	1	0
34996507	MisMatch	NOT_in_TF_list		synergin gamma [Mus musculus]	14	14	1	0	0	0	0	0	0	1	0
10048438	XPO4	NOT_in_TF_list		exportin-4 [Mus musculus]	5	9	1	0	0	452117	0	0	0	1	0
34328334	ACOX3	NOT_in_TF_list		peroxisomal acyl-coenzyme A oxidase 3 [Mus musculus]	5	5	6	1.1148e+08	0	2.43464e+07	5.99442e+07	2	0	2	2
189491859	IQCH	NOT_in_TF_list		IQ domain-containing protein H [Mus musculus]	5	5	1	0	0	3.26083e+07	0	0	0	1	0
357527351	MisMatch	NOT_in_TF_list		SH2 domain-containing protein 3C isoform 2 [Mus musculus]	11	12	1	1.77938e+06	0	0	0	1	0	0	0
126722834	TNC	NOT_in_TF_list		tenascin precursor [Mus musculus]	3	7	1	0	0	1.41506e+07	0	0	0	1	0
161016841	DSC1	NOT_in_TF_list		desmocollin-1 precursor [Mus musculus]	4	10	1	8.25213e+06	0	0	0	1	0	0	0
283046678	SCUBE2	NOT_in_TF_list		signal peptide, CUB and EGF-like domain-containing protein 2 precursor [Mus musculus]	7	7	1	0	0	0	0	0	0	1	0
134288853	NOTCH2	GeneID:4853	Mus musculus	neurogenic locus notch homolog protein 2 precursor [Mus musculus]	6	6	1	0	0	0	0	0	0	1	0
253314408	SZT2	NOT_in_TF_list		protein SZT2 [Mus musculus]	8	10	1	0	0	0	0	0	0	1	0
124486586	AUTS2	NOT_in_TF_list		autism susceptibility gene 2 protein [Mus musculus]	1	20	1	0	0	0	0	0	1	0	0
110347487	ACO1	NOT_in_TF_list		cytoplasmic aconitate hydratase [Mus musculus]	3	3	1	3.3231e+06	0	0	0	1	0	0	0
9789931	DIAP3	NOT_in_TF_list		protein diaphanous homolog 3 [Mus musculus]	15	15	1	0	0	5.36775e+06	0	0	0	1	0
244793002	YTHDC2	NOT_in_TF_list		probable ATP-dependent RNA helicase YTHDC2 [Mus musculus]	1	1	1	0	0	0	0	0	0	1	0
154240682	AW555464	NOT_in_TF_list		centrosomal protein of 170 kDa protein B [Mus musculus]	16	16	1	0	0	0	0	0	0	1	0
159110562	ICAM5	NOT_in_TF_list		intercellular adhesion molecule 5 precursor [Mus musculus]	1	1	1	0	0	0	1.58451e+06	0	0	0	1
62526126	EXOC6	NOT_in_TF_list		exocyst complex component 6 [Mus musculus]	18	18	1	0	0	0	7.83627e+06	0	0	0	1
124487145	1110037F02RIK	NOT_in_TF_list		protein virilizer homolog [Mus musculus]	4	4	1	0	0	3.28132e+06	0	0	0	1	0
111185914	FES	NOT_in_TF_list		tyrosine-protein kinase Fes/Fps [Mus musculus]	4	4	1	1.14886e+06	0	0	0	1	0	0	0
71979930	SPECC1	NOT_in_TF_list		cytospin-B [Mus musculus]	6	9	1	3.79971e+07	0	0	0	1	0	0	0
84370015	FLG2	NOT_in_TF_list		filaggrin-2 [Mus musculus]	6	10	2	1.93357e+06	0	5.5972e+06	0	1	0	1	0
159110415	GUCY2E	NOT_in_TF_list		guanylyl cyclase GC-E precursor [Mus musculus]	16	16	2	0	0	597487599	0	0	0	2	0
171846249	MAP3K5	NOT_in_TF_list		mitogen-activated protein kinase kinase kinase 5 [Mus musculus]	10	10	1	0	0	0	0	0	0	1	0
242247225	SPATA13	NOT_in_TF_list		spermatogenesis-associated protein 13 [Mus musculus]	2	2	1	0	0	0	1.46524e+08	0	0	0	1
166706913	PPIP5K2	NOT_in_TF_list		inositol hexakisphosphate and diphosphoinositol-pentakisphosphate kinase 2 [Mus musculus]	2	2	1	0	0	0	3.36447e+06	0	0	0	1
157277983	VMN2R17	NOT_in_TF_list		vomeronasal receptor Vmn2r17 precursor [Mus musculus]	2	2	1	0	0	0	2.25902e+06	0	0	0	1
147905039	4922501C03RIK	NOT_in_TF_list		protein QN1 homolog [Mus musculus]	24	24	1	0	0	0	0	0	0	1	0
119508422	SETD1A	NOT_in_TF_list		SET domain containing 1A [Mus musculus]	2	2	1	0	0	3.49256e+06	0	0	0	1	0
256818750	URB1	NOT_in_TF_list		nucleolar pre-ribosomal-associated protein 1 [Mus musculus]	7	7	1	0	0	156026	0	0	0	1	0
145699119	SPEG	NOT_in_TF_list		striated muscle-specific serine/threonine-protein kinase isoform 3 [Mus musculus]	3	3	1	0	0	2.08623e+06	0	0	0	1	0
57242788	DZIP1	GeneID:22873	Mus musculus	zinc finger protein DZIP1 [Mus musculus]	8	8	1	0	0	1.34795e+08	0	0	0	1	0
269995993	BCOR	NOT_in_TF_list		BCL-6 corepressor isoform d [Mus musculus]	7	7	1	586813	0	0	0	1	0	0	0
93004085	PCNT	NOT_in_TF_list		pericentrin [Mus musculus]	3	3	5	2.77825e+06	0	4.67542e+07	6.76423e+06	1	1	1	2
157909795	C230081A13RIK	NOT_in_TF_list		pseudopodium-enriched atypical kinase 1 [Mus musculus]	4	4	2	1.05921e+06	0	0	1.48266e+06	1	0	0	1
94395133	GM8777	NOT_in_TF_list		PREDICTED: uncharacterized protein LOC667712 [Mus musculus]	3	3	1	0	0	0	0	0	1	0	0
203097667	ARHGAP21	NOT_in_TF_list		rho GTPase-activating protein 21 isoform 2 [Mus musculus]	9	9	1	0	0	435600	0	0	0	1	0
114205420	AOX3	NOT_in_TF_list		aldehyde oxidase 3 [Mus musculus]	7	7	1	0	0	2.71412e+06	0	0	0	1	0
31621307	DSG4	NOT_in_TF_list		desmoglein-4 precursor [Mus musculus]	4	4	1	0	0	0	1.19596e+07	0	0	0	1
110225366	CACNA1B	NOT_in_TF_list		voltage-dependent N-type calcium channel subunit alpha-1B isoform 2 [Mus musculus]	4	4	1	0	0	1.70369e+07	0	0	0	1	0
115495455	XRN1	NOT_in_TF_list		5'-3' exoribonuclease 1 [Mus musculus]	9	9	1	0	0	1.07342e+06	0	0	0	1	0
149234198	E030010N08RIK	NOT_in_TF_list		PREDICTED: rootletin [Mus musculus]	13	13	1	0	0	0	0	0	0	1	0
189491671	DIAP2	NOT_in_TF_list		protein diaphanous homolog 2 [Mus musculus]	10	11	1	0	0	0	1.44761e+06	0	0	0	1
120300980	USP9Y	NOT_in_TF_list		ubiquitin specific peptidase 9, Y chromosome [Mus musculus]	19	20	1	0	0	0	0	0	0	1	0
56550079	CGNL1	NOT_in_TF_list		cingulin-like protein 1 [Mus musculus]	2	4	1	2.09559e+06	0	0	0	1	0	0	0
226246610	MAN2A1	NOT_in_TF_list		alpha-mannosidase 2 [Mus musculus]	12	12	1	0	0	0	202395	0	0	0	1
124487411	BRCA2	NOT_in_TF_list		breast cancer type 2 susceptibility protein homolog [Mus musculus]	7	8	1	0	0	0	0	0	1	0	0
144922653	FBF1	NOT_in_TF_list		fas-binding factor 1 [Mus musculus]	4	7	1	0	0	9.12188e+06	0	0	0	1	0
70995287	CABIN1	NOT_in_TF_list		calcineurin binding protein 1 [Mus musculus]	5	5	1	0	0	0	0	0	0	1	0
239985588	CHD1	NOT_in_TF_list		chromodomain-helicase-DNA-binding protein 1 [Mus musculus]	8	8	1	0	0	700242	0	0	0	1	0
377834844	MisMatch	NOT_in_TF_list		PREDICTED: hemicentin-2 [Mus musculus]	3	3	1	761884	0	0	0	1	0	0	0
154091016	ATRX	NOT_in_TF_list		transcriptional regulator ATRX [Mus musculus]	4	4	1	0	0	0	0	0	0	1	0
118026944	NCOA2	NOT_in_TF_list		nuclear receptor coactivator 2 isoform b [Mus musculus]	5	5	1	0	0	1.19238e+06	0	0	0	1	0
258645133	SLC38A10	NOT_in_TF_list		putative sodium-coupled neutral amino acid transporter 10 isoform 2 [Mus musculus]	5	7	1	0	0	2.99908e+06	0	0	0	1	0
156938293	SCAP	NOT_in_TF_list		sterol regulatory element-binding protein cleavage-activating protein [Mus musculus]	5	5	1	0	0	1.12815e+08	0	0	0	1	0
33563303	ARHGAP29	NOT_in_TF_list		rho GTPase-activating protein 29 [Mus musculus]	13	13	1	0	0	0	6.50779e+06	0	0	0	1
124487433	ANKRD26	NOT_in_TF_list		ankyrin repeat domain-containing protein 26 [Mus musculus]	4	8	1	0	0	1.87548e+07	0	0	0	1	0
111185907	EVPL	NOT_in_TF_list		envoplakin [Mus musculus]	8	8	1	0	0	1.17857e+07	0	0	0	1	0
23346557	OPLAH	NOT_in_TF_list		5-oxoprolinase [Mus musculus]	2	2	1	0	0	0	1.98664e+06	0	0	0	1
94369682	DCHS2	NOT_in_TF_list		PREDICTED: similar to cadherin protein [Mus musculus]	3	8	1	0	0	12561439	0	0	0	1	0
194394221	VPS13B	NOT_in_TF_list		vacuolar protein sorting-associated protein 13B [Mus musculus]	1	6	10	0	0	710151290	9.38897e+06	1	0	5	4
356640155	MisMatch	NOT_in_TF_list		nuclear receptor corepressor 1 isoform 1 [Mus musculus]	9	12	1	0	0	327276	0	0	0	1	0
61742810	ZC3H13	NOT_in_TF_list		RIKEN cDNA 3110050K21 [Mus musculus]	7	7	1	0	0	1.91311e+06	0	0	0	1	0
268607688	FREM3	NOT_in_TF_list		FRAS1-related extracellular matrix protein 3 precursor [Mus musculus]	25	25	1	0	0	500993	0	0	0	1	0
153791270	LAMC1	NOT_in_TF_list		laminin subunit gamma-1 precursor [Mus musculus]	27	27	1	3.56228e+06	0	0	0	1	0	0	0
124487319	CIT	NOT_in_TF_list		citron Rho-interacting kinase [Mus musculus]	3	3	1	0	0	0	522893	0	0	0	1
256773195	CMYA5	NOT_in_TF_list		cardiomyopathy-associated protein 5 [Mus musculus]	6	6	1	447342	0	0	0	1	0	0	0
6679389	PLXNA1	NOT_in_TF_list		plexin-A1 precursor [Mus musculus]	5	7	1	0	0	0	5.98242e+06	0	0	0	1
110625717	2610034M16RIK	NOT_in_TF_list		uncharacterized protein LOC69239 [Mus musculus]	6	6	1	3.17522e+06	0	0	0	1	0	0	0
295293085	9930021J03RIK	NOT_in_TF_list		uncharacterized protein LOC240613 [Mus musculus]	8	10	1	128162	0	0	0	1	0	0	0
125628627	RYR3	NOT_in_TF_list		ryanodine receptor 3 [Mus musculus]	13	13	1	1.6562e+07	0	0	0	1	0	0	0
307344699	5430411K18RIK	NOT_in_TF_list		ectopic P granules protein 5 homolog [Mus musculus]	8	8	2	0	0	0	2.4799e+08	0	0	0	2
125628644	ATP10B	NOT_in_TF_list		probable phospholipid-transporting ATPase VB [Mus musculus]	5	5	1	0	0	0	1.13014e+07	0	0	0	1
167466226	NAV2	NOT_in_TF_list		neuron navigator 2 isoform 2 [Mus musculus]	3	3	1	2.56349e+06	0	0	0	1	0	0	0
134948762	PTPN13	NOT_in_TF_list		tyrosine-protein phosphatase non-receptor type 13 [Mus musculus]	10	16	1	7.34769e+07	0	0	0	1	0	0	0
124486628	D430042O09RIK	NOT_in_TF_list		uncharacterized protein KIAA0556 [Mus musculus]	4	4	1	0	0	0	0	0	0	0	1
218505688	LRRC9	NOT_in_TF_list		leucine-rich repeat-containing protein 9 isoform 1 [Mus musculus]	8	8	1	0	0	0	2.06293e+06	0	0	0	1
309272480	LOC100504484	NOT_in_TF_list		PREDICTED: uncharacterized protein C2orf16-like [Mus musculus]	3	4	1	0	0	1.20415e+07	0	0	0	1	0
[truncated: 2,002 more rows]

## Sheet: Pck1p #2 TFs
							iBAQ								Minus NC (background binding) iBAQ
[truncated: 149 more rows]

[truncated: 12 more sheets: Pck1p #3 total, Pck1p #3 TFs, G6pcp #1 total, G6pcp #1 TFs, G6pcp #2 total, G6pcp #2 TFs, G6pcp #3 total, G6pcp #3 TFs, Pck1p∆IRS total, Pck1p∆IRS TFs, Liver pulldown total, Liver pulldown TFs]
