# Supplementary material for: Identification of Insulin-Responsive Transcription Factors That Regulate Glucose Production by Hepatocytes
Source: Oxford University Press journal article supplement (doi:10.2337/db18-1236), 2019-04-01
Supplement: db181236supplementarydata3.xlsx [file db181236supplementarydata3.xlsx]

## Sheet: Liver TFs
								iBAQ					PSM
Accession	Gene			Description	# Peptides	# PSMs	# Unique Peptides	Liver NC	Pck1p fast	Pck1p refed	G6pcp fast	G6pcp refed	Liver NC	Pck1p fast	Pck1p refed	G6pcp fast	G6pcp refed
158508460	AHCTF1	AT hook, DNA-binding motif	Ahctf1	protein ELYS [Mus musculus]	66	452	66	5.4166e+06	6.21851e+07	1.28859e+08	6.92693e+07	2.28621e+08	13	80	144	66	152
66955886	PDS5B	AT hook, DNA-binding motif|Armadillo-type fold	Pds5b	sister chromatid cohesion protein PDS5 homolog B [Mus musculus]	45	223	42	0	4.58751e+07	5.38614e+07	4.10094e+07	6.43485e+07	1	57	60	43	64
22779899	CDC5L	SANT, DNA-binding|Homeodomain-like|Homeodomain-related|Myb, DNA-binding|HTH transcriptional regulator, Myb-type, DNA-binding|Myb transcription factor|Protein of unknown function DUF3351	Cdc5l	cell division cycle 5-like protein [Mus musculus]	33	228	33	4.06119e+06	7.10231e+07	6.48882e+07	8.58863e+07	7.18992e+07	6	51	57	59	51
257196201	ZBTB20	BTB/POZ-like|Zinc finger, C2H2-type|BTB/POZ fold|BTB/POZ|Zinc finger, C2H2-type/integrase, DNA-binding|Zinc finger, C2H2-like	Zbtb20	zinc finger and BTB domain-containing protein 20 isoform L [Mus musculus]	18	231	16	4.79126e+06	6.09812e+07	1.20345e+08	6.61399e+07	5.41692e+08	8	32	54	37	101
6680241	ONECUT1	Homeobox|Homeodomain protein CUT|Homeodomain-like|Homeodomain-related	Onecut1	hepatocyte nuclear factor 6 [Mus musculus]	15	180	12	0	603769	1.77754e+08	1.68578e+08	4.68584e+08	0	9	52	19	95
171846256	NFIA	CTF transcription factor/nuclear factor 1, conserved site|MAD homology 1, Dwarfin-type|CTF transcription factor/nuclear factor 1, DNA-binding domain|CTF transcription factor/nuclear factor 1|CTF transcription factor/nuclear factor 1, N-terminal	Nfia	nuclear factor 1 A-type isoform 1 [Mus musculus]	14	146	11	0	5.91532e+07	1.03732e+08	4.25994e+07	9.51684e+07	0	27	50	24	40
166235125	SMARCC2	Chromo domain|SANT, DNA-binding|BRCT|SWIRM|Homeodomain-like|Myb, DNA-binding|SANT, eukarya	Smarcc2	SWI/SNF complex subunit SMARCC2 isoform 1 [Mus musculus]	30	117	24	1.04264e+06	2.66912e+07	2.17085e+07	1.57579e+07	1.80376e+07	3	31	34	22	25
40254124	SMARCA5	SNF2-related|SANT, DNA-binding|DNA/RNA helicase, C-terminal|Homeodomain-like|DEAD-like helicase, N-terminal|Helicase, superfamily 1/2, ATP-binding domain|ATPase, nucleosome remodelling ISWI, HAND domain|SLIDE|SANT, eukarya	Smarca5	SWI/SNF-related matrix-associated actin-dependent regulator of chromatin subfamily A member 5 [Mus musculus]	38	151	38	9.46721e+06	5.22648e+07	2.8184e+07	1.16372e+08	8.76964e+07	14	36	28	43	29
6679042	NFIC	CTF transcription factor/nuclear factor 1, conserved site|MAD homology 1, Dwarfin-type|CTF transcription factor/nuclear factor 1, DNA-binding domain|CTF transcription factor/nuclear factor 1|CTF transcription factor/nuclear factor 1, N-terminal	Nfic	nuclear factor 1 C-type isoform a [Mus musculus]	17	130	15	1.03021e+06	6.84566e+07	1.9576e+08	5.83308e+07	2.0358e+08	1	22	44	23	42
126517474	NFIX	CTF transcription factor/nuclear factor 1, conserved site|MAD homology 1, Dwarfin-type|CTF transcription factor/nuclear factor 1, DNA-binding domain|CTF transcription factor/nuclear factor 1|CTF transcription factor/nuclear factor 1, N-terminal	Nfix	nuclear factor 1 X-type isoform 3 [Mus musculus]	13	169	12	2.44072e+06	6.40996e+07	1.20834e+08	8.46579e+07	1.73621e+08	2	30	50	27	57
166295202	HNF1A	Homeobox|Hepatocyte nuclear factor 1, beta isoform, C-terminal|Hepatocyte nuclear factor 1, alpha isoform C-terminal|Hepatocyte nuclear factor 1, N-terminal|Homeodomain-like|Lambda repressor-like, DNA-binding|Homeodomain-related	Hnf1a	hepatocyte nuclear factor 1-alpha [Mus musculus]	12	108	10	0	2.94103e+07	8.40753e+07	3.76535e+07	1.75908e+08	0	16	30	13	49
113205057	UBTF	High mobility group, HMG1/HMG2|High mobility group, superfamily	Ubtf	nucleolar transcription factor 1 isoform 1 [Mus musculus]	21	162	21	2.2703e+07	6.15455e+07	5.0313e+07	7.07142e+07	6.14997e+07	20	41	35	31	31
113205059	YBX1	Cold-shock conserved site|Cold-shock protein, DNA-binding|Cold shock protein|Nucleic acid-binding, OB-fold|Nucleic acid-binding, OB-fold-like	Ybx1	nuclease-sensitive element-binding protein 1 [Mus musculus]	12	127	8	4.6435e+07	1.11131e+08	1.38823e+08	8.21505e+07	7.80912e+07	24	27	33	24	19
254553392	ZFP512	Zinc finger, C2H2-type|Zinc finger, C2H2-like	Zfp512	zinc finger protein 512 [Mus musculus]	15	104	15	1.28082e+07	3.21116e+07	1.38836e+07	4.34207e+07	1.82276e+07	15	26	19	33	15
163965420	NFIB	CTF transcription factor/nuclear factor 1, conserved site|MAD homology 1, Dwarfin-type|CTF transcription factor/nuclear factor 1, DNA-binding domain|CTF transcription factor/nuclear factor 1|CTF transcription factor/nuclear factor 1, N-terminal	Nfib	nuclear factor 1 B-type isoform 1 [Mus musculus]	14	97	12	2.3579e+06	4.48118e+07	7.69767e+07	4.87827e+07	1.19657e+08	2	21	28	15	29
6755384	RXRA	Nuclear hormone receptor, ligand-binding, core|Zinc finger, nuclear hormone receptor-type|Nuclear hormone receptor, ligand-binding|Retinoid X receptor|Steroid hormone receptor|Protein of unknown function DUF3345	Rxra	retinoic acid receptor RXR-alpha [Mus musculus]	12	91	6	0	3.88831e+07	5.79364e+07	2.51426e+07	3.73508e+07	0	22	31	16	22
14010847	NR5A2	Nuclear hormone receptor, ligand-binding, core|Zinc finger, nuclear hormone receptor-type|Nuclear hormone receptor, ligand-binding|Zinc finger, NHR/GATA-type|Vitamin D receptor|Steroid hormone receptor|Orphan nuclear receptor Fushi-tarazu factor 1	Nr5a2	nuclear receptor subfamily 5 group A member 2 isoform 1 [Mus musculus]	13	104	13	0	7.88562e+06	4.16026e+07	6.41536e+07	1.10242e+08	0	7	29	26	42
40789094	ZHX2	Homeobox|Zinc finger, C2H2-type|Homeodomain-like|Homeodomain-related|Zinc finger, C2H2-like	Zhx2	zinc fingers and homeoboxes protein 2 [Mus musculus]	18	55	18	0	5.89522e+06	1.20977e+07	6.03324e+06	4.11587e+07	0	9	15	5	30
295424118	RREB1	Zinc finger, C2H2-type|Zinc finger, C2H2-type/integrase, DNA-binding|Zinc finger, C2H2-like	Rreb1	ras-responsive element-binding protein 1 isoform 2 [Mus musculus]	20	61	20	0	7.06422e+06	1.80501e+07	2.33343e+06	2.76681e+07	0	11	21	4	28
6678303	TFAM	High mobility group, HMG1/HMG2|High mobility group, superfamily	Tfam	transcription factor A, mitochondrial precursor [Mus musculus]	14	210	14	9.15791e+06	6.01614e+08	6.26354e+08	6.31261e+08	4.99582e+08	2	53	55	56	45
110225364	ZFHX3	Homeobox, conserved site|Homeobox|Zinc finger, U1-type|Zinc finger, C2H2-type|Homeodomain-like|Homeodomain-related|Zinc finger, C2H2-type/integrase, DNA-binding|Zinc finger, C2H2-like	Zfhx3	zinc finger homeobox protein 3 [Mus musculus]	22	39	22	0	2.25464e+06	2.21686e+07	0	1.03235e+07	0	2	26	0	9
10181166	SMARCE1	High mobility group, HMG1/HMG2|High mobility group, superfamily	Smarce1	SWI/SNF-related matrix-associated actin-dependent regulator of chromatin subfamily E member 1 [Mus musculus]	12	56	12	0	1.67687e+07	1.63117e+07	1.05994e+07	1.17783e+07	0	17	16	11	15
119220568	ONECUT2	Homeobox|Homeodomain protein CUT|Homeodomain-like|Homeodomain-related	Onecut2	one cut domain family member 2 [Mus musculus]	13	110	10	0	1.51923e+07	4.15367e+07	6.30909e+07	2.17675e+08	2	13	28	17	49
6756049	ZFP148	Zinc finger, C2H2-type|Zinc finger, C2H2-type/integrase, DNA-binding|Zinc finger, C2H2-like	Zfp148	zinc finger protein 148 [Mus musculus]	12	43	12	0	1.25474e+07	4.7538e+07	1.12826e+06	2.47987e+06	0	9	30	2	2
254911067	NR1H4	Nuclear hormone receptor, ligand-binding, core|Zinc finger, nuclear hormone receptor-type|Nuclear hormone receptor, ligand-binding|Zinc finger, NHR/GATA-type|Vitamin D receptor|Steroid hormone receptor	Nr1h4	bile acid receptor isoform 1 [Mus musculus]	12	55	12	0	4.14756e+06	2.54971e+07	3.6687e+06	2.23296e+07	0	7	21	6	21
46909569	GATA4	Zinc finger, GATA-type|GATA-type transcription activator, N-terminal|Zinc finger, NHR/GATA-type|Transcription factor GATA-4/5/6	Gata4	transcription factor GATA-4 [Mus musculus]	5	49	5	0	2.46205e+07	6.71917e+07	1.03062e+07	3.08509e+07	0	8	25	3	13
124249109	ARID1A	ARID/BRIGHT DNA-binding domain|Protein of unknown function DUF3518	Arid1a	AT-rich interactive domain-containing protein 1A [Mus musculus]	19	48	15	0	9.80402e+06	9.91774e+06	5.89989e+06	1.14258e+07	0	15	16	4	14
40254321	ZHX3	Homeobox|Homeodomain-like|Homeodomain-related|Zinc finger, C2H2-like	Zhx3	zinc fingers and homeoboxes protein 3 [Mus musculus]	14	39	14	0	4.15413e+06	6.83507e+06	2.59611e+06	2.44273e+07	0	4	7	2	26
46575916	HNF4A	Nuclear hormone receptor, ligand-binding, core|Zinc finger, nuclear hormone receptor-type|Nuclear hormone receptor, ligand-binding|Retinoid X receptor|Steroid hormone receptor	Hnf4a	hepatocyte nuclear factor 4-alpha [Mus musculus]	8	80	8	4.12299e+06	1.00596e+08	2.12888e+08	6.2736e+07	2.03398e+08	3	15	32	15	17
6753404	CEBPB	Basic-leucine zipper (bZIP) transcription factor|Basic leucine zipper|CCAAT/enhancer-binding	Cebpb	CCAAT/enhancer-binding protein beta [Mus musculus]	7	92	7	0	3.67986e+08	2.36003e+08	1.04726e+08	1.44118e+08	0	35	26	15	17
239835744	TFEB	Helix-loop-helix DNA-binding domain|Helix-loop-helix DNA-binding|Protein of unknown function DUF3371	Tfeb	transcription factor EB isoform a [Mus musculus]	11	64	9	0	1.30705e+07	3.76147e+07	0	8.49214e+06	0	11	36	0	15
67906168	NR2C2	Nuclear hormone receptor, ligand-binding, core|Zinc finger, nuclear hormone receptor-type|Nuclear hormone receptor, ligand-binding|Zinc finger, NHR/GATA-type|Vitamin D receptor|Steroid hormone receptor	Nr2c2	nuclear receptor subfamily 2 group C member 2 [Mus musculus]	15	21	14	0	1.01056e+06	1.7311e+07	0	863435	0	2	16	0	2
134032032	UBP1	CP2 transcription factor|Sterile alpha motif homology	Ubp1	upstream-binding protein 1 isoform a [Mus musculus]	9	28	9	0	1.35794e+07	1.90082e+07	8.99051e+06	1.25022e+07	0	6	13	4	6
126352391	ZFP384	Zinc finger, C2H2-type|Zinc finger, C2H2-type/integrase, DNA-binding|Zinc finger, C2H2-like	Zfp384	zinc finger protein 384 isoform 1 [Mus musculus]	8	43	6	1521299	6.18971e+06	9.28887e+06	5.09819e+06	1.3887e+07	0	8	0	12	11
226437608	GCFC1	GC-rich sequence DNA-binding factor-like	Paxbp1	PAX3- and PAX7-binding protein 1 [Mus musculus]	15	53	15	873899	1.23813e+07	1.39888e+07	1.90346e+07	1.77565e+07	1	9	14	18	13
51491880	MTA2	Zinc finger, GATA-type|ELM2|SANT, DNA-binding|Bromo adjacent homology (BAH) domain|SANT, eukarya	Mta2	metastasis-associated protein MTA2 [Mus musculus]	17	57	16	1.4252e+06	1.75283e+07	1.40226e+07	8.46059e+06	1.51443e+07	2	15	15	14	10
31542626	HMBOX1	Homeobox|Hepatocyte nuclear factor 1, N-terminal|Homeodomain-like|Lambda repressor-like, DNA-binding|Homeodomain-related	Hmbox1	homeobox-containing protein 1 [Mus musculus]	10	39	9	0	5.2854e+06	4.62526e+07	3.29409e+06	2.05286e+07	0	6	18	3	12
112293262	ESRRA	Nuclear hormone receptor, ligand-binding, core|Zinc finger, nuclear hormone receptor-type|Nuclear hormone receptor, ligand-binding|Zinc finger, NHR/GATA-type|Retinoid X receptor|Steroid hormone receptor	Esrra	steroid hormone receptor ERR1 [Mus musculus]	9	30	9	0	1.05391e+07	3.16015e+07	3.2156e+06	1.73175e+07	0	8	10	5	7
6753644	DLX1	Homeobox, conserved site|Helix-turn-helix motif, lambda-like repressor|Homeobox|Homeodomain-like|Homeodomain-related|Homeobox, region	Dlx1	homeobox protein DLX-1 [Mus musculus]	8	39	8	0	3.49633e+08	0	0	0	0	39	0	0	0
94400775	RBPJ	Cell surface receptor IPT/TIG|p53-like transcription factor, DNA-binding|Immunoglobulin-like fold|Immunoglobulin E-set|Beta-trefoil|LAG1, DNA binding	Rbpj	recombining binding protein suppressor of hairless isoform 1 [Mus musculus]	9	34	9	0	1.58423e+07	1.88619e+07	7.14198e+06	1.21592e+07	0	8	13	5	7
7106459	CLOCK	PAS|Helix-loop-helix DNA-binding domain|Helix-loop-helix DNA-binding|PAS fold-3|PAS fold|Nuclear translocator|PAC motif	Clock	circadian locomoter output cycles protein kaput [Mus musculus]	12	37	12	0	6.04947e+06	2.25784e+07	2.68036e+06	7.64658e+06	0	7	22	2	5
6679483	PROX1	Homeodomain-like|Homeobox prospero-like	Prox1	prospero homeobox protein 1 [Mus musculus]	11	43	11	0	4.42131e+06	1.00909e+07	7.67973e+06	1.16524e+07	1	7	14	7	16
86198301	CEBPA	Basic-leucine zipper (bZIP) transcription factor|Basic leucine zipper|CCAAT/enhancer-binding	Cebpa	CCAAT/enhancer-binding protein alpha [Mus musculus]	8	93	8	3.34231e+06	3.32467e+08	8.16271e+08	9.7005e+07	3.78716e+08	1	26	35	12	20
38327623	TBX3	Transcription factor, T-box, conserved site|p53-like transcription factor, DNA-binding|Transcription factor, T-box	Tbx3	T-box transcription factor TBX3 isoform 2 [Mus musculus]	12	34	12	0	6.20361e+06	2.64334e+07	2.28448e+06	1.01528e+07	0	7	14	0	10
31044459	CTCF	Zinc finger, C2H2-type|Zinc finger, C2H2-type/integrase, DNA-binding|Zinc finger, C2H2-like	Ctcf	transcriptional repressor CTCF [Mus musculus]	11	40	11	5.66199e+06	1.31484e+07	4.42604e+07	1.53356e+07	7.36446e+06	3	5	20	8	4
262205246	TEAD1	TEA/ATTS|Transcriptional enhancer factor	Tead1	transcriptional enhancer factor TEF-1 isoform 1 [Mus musculus]	7	22	4	0	0	5.8683e+06	0	862719	0	4	11	2	4
47059495	CSDA	Cold-shock conserved site|Cold-shock protein, DNA-binding|Cold shock protein|Nucleic acid-binding, OB-fold|Nucleic acid-binding, OB-fold-like	Ybx3	Y-box-binding protein 3 long isoform [Mus musculus]	6	43	2	0	0	4.67259e+06	0	0	0	0	11	0	0
109627663	ZHX1	Homeobox|Zinc finger, C2H2-type|Homeodomain-like|Homeodomain-related|Zinc finger, C2H2-like	Zhx1	zinc fingers and homeoboxes protein 1 [Mus musculus]	8	17	8	0	0	3.83266e+06	2.07257e+06	2.77114e+07	0	0	3	3	12
166706895	TOX4	High mobility group, HMG1/HMG2, subgroup|High mobility group, HMG1/HMG2|High mobility group, superfamily	Tox4	TOX high mobility group box family member 4 [Mus musculus]	10	47	10	0	1.89515e+07	1.97731e+07	7.05485e+06	1.66555e+07	0	17	14	5	11
157384990	TFE3	Helix-loop-helix DNA-binding domain|Helix-loop-helix DNA-binding|Protein of unknown function DUF3371	Tfe3	transcription factor E3 isoform a [Mus musculus]	9	38	7	0	1.41011e+07	5.50459e+07	0	6.87251e+06	0	10	18	3	6
6680732	ARNTL	PAS|Helix-loop-helix DNA-binding domain|Helix-loop-helix DNA-binding|PAS fold-3|PAS fold|Nuclear translocator|PAC motif	Arntl	aryl hydrocarbon receptor nuclear translocator-like protein 1 isoform 1 [Mus musculus]	10	24	10	0	4.89043e+06	2.04474e+07	3.96797e+06	8.34811e+06	0	5	13	3	3
218931186	TCF7L2	High mobility group, HMG1/HMG2|High mobility group, superfamily|CTNNB1 binding, N-teminal	Tcf7l2	transcription factor 7-like 2 isoform 4 [Mus musculus]	7	18	7	0	0	1.5301e+07	1.02721e+07	3.40473e+07	0	0	0	0	8
170650717	DBP	Basic-leucine zipper (bZIP) transcription factor|Basic leucine zipper	Dbp	D site-binding protein [Mus musculus]	5	16	5	0	3.58323e+06	3.20202e+07	0	1.50326e+06	0	1	13	0	4
67188876	CEBPZ	CCAAT-binding factor|Armadillo-type fold	Cebpz	CCAAT/enhancer-binding protein zeta [Mus musculus]	11	25	11	7.31682e+06	1.26323e+07	3.31831e+06	1.18148e+07	3.264e+06	6	6	4	8	2
145553997	ARID1B	ARID/BRIGHT DNA-binding domain|Protein of unknown function DUF3518	Arid1b	AT rich interactive domain 1B (Swi1 like) [Mus musculus]	7	17	4	0	7.93372e+06	5.62103e+06	0	0	0	4	9	0	3
327315356	RXRB	Nuclear hormone receptor, ligand-binding, core|Zinc finger, nuclear hormone receptor-type|Nuclear hormone receptor, ligand-binding|Zinc finger, NHR/GATA-type|Retinoid X receptor|Steroid hormone receptor	Rxrb	retinoic acid receptor RXR-beta isoform 1 [Mus musculus]	6	40	1	0	0	0	0	0	0	0	0	0	6
164519134	GATAD2A	Zinc finger, GATA-type	Gatad2a	transcriptional repressor p66 alpha isoform b [Mus musculus]	10	22	10	0	9.64061e+06	1.73478e+06	0	3.77208e+06	0	8	0	0	0
113205067	ZFX	Transcriptional activator, Zfx / Zfy domain|Zinc finger, C2H2-type|Zinc finger, C2H2-type/integrase, DNA-binding|Zinc finger, C2H2-like	Zfx	zinc finger X-chromosomal protein [Mus musculus]	6	53	6	185105	9.83874e+06	1.49311e+07	1.2314e+07	1.16666e+07	3	11	17	13	7
21312242	ZFP655	Zinc finger, C2H2-type|Zinc finger, C2H2-type/integrase, DNA-binding|Zinc finger, C2H2-like	Zfp655	zinc finger protein 655 isoform a [Mus musculus]	8	23	8	2.13875e+06	2.80461e+06	2.77447e+06	2.95862e+06	2.58081e+06	3	7	5	4	4
28076891	ZFP422	Zinc finger, C2H2-type|Zinc finger, C2H2-type/integrase, DNA-binding|Zinc finger, C2H2-like	Zfp422	zinc finger protein 22 [Mus musculus]	6	43	5	2.03298e+07	2.62598e+07	1.11808e+07	4.41016e+07	1.5222e+07	9	11	4	11	7
12963557	DMAP1	SANT, DNA-binding|DNA methyltransferase 1-associated 1	Dmap1	DNA methyltransferase 1-associated protein 1 [Mus musculus]	7	15	7	0	2.6072e+06	4.38097e+06	3.1557e+06	4.09555e+06	0	3	6	3	3
13626034	TFAP4	Helix-loop-helix DNA-binding domain|Helix-loop-helix DNA-binding	Tfap4	transcription factor AP-4 [Mus musculus]	5	9	5	0	5.4114e+06	4.84559e+07	0	3.41971e+06	0	1	7	0	2
6677829	RXRG	Nuclear hormone receptor, ligand-binding, core|Zinc finger, nuclear hormone receptor-type|Nuclear hormone receptor, ligand-binding|Retinoid X receptor|Steroid hormone receptor|Protein of unknown function DUF3345	Rxrg	retinoic acid receptor RXR-gamma isoform 1 [Mus musculus]	6	31	2	0	0	4.60641e+06	0	5.67615e+06	0	0	5	0	4
160948575	TERF2IP	Homeodomain-like|Homeodomain-related|Rap1 Myb	Terf2ip	telomeric repeat-binding factor 2-interacting protein 1 [Mus musculus]	8	19	8	0	4066680	3.57421e+06	2.86661e+06	3.52947e+06	0	7	4	5	3
34328119	GABPA	Ets|Sterile alpha motif/pointed|Sterile alpha motif homology|Winged helix-turn-helix transcription repressor DNA-binding|Sterile alpha motif-type|Transcription factor, GA-binding, alpha subunit	Gabpa	GA-binding protein alpha chain [Mus musculus]	6	10	6	0	0	0	2.77358e+06	7.20597e+06	0	0	0	4	6
188497644	NOC3L	CCAAT-binding factor|Nucleolar complex-associated|Nucleolar complex-associated protein 3	Noc3l	nucleolar complex protein 3 homolog [Mus musculus]	6	14	6	3.57215e+06	5.50923e+06	2.94075e+06	9.71977e+06	1.5759e+06	3	3	1	7	1
85701534	ZBTB45	BTB/POZ-like|Zinc finger, C2H2-type|BTB/POZ fold|BTB/POZ|Zinc finger, C2H2-type/integrase, DNA-binding|Zinc finger, C2H2-like	Zbtb45	zinc finger and BTB domain-containing protein 45 [Mus musculus]	3	26	1	0	0	0	0	1.20034e+07	0	0	0	0	7
111185900	HNF1B	Homeobox|Hepatocyte nuclear factor 1, beta isoform, C-terminal|Hepatocyte nuclear factor 1, N-terminal|Homeodomain-like|Lambda repressor-like, DNA-binding|Homeodomain-related	Hnf1b	hepatocyte nuclear factor 1-beta [Mus musculus]	5	18	3	0	1.33744e+06	7.81786e+06	1.73382e+06	1.24714e+07	0	2	6	1	9
112421097	SMARCC1	Chromo domain|SANT, DNA-binding|BRCT|SWIRM|Homeodomain-like|Myb, DNA-binding|SANT, eukarya	Smarcc1	SWI/SNF complex subunit SMARCC1 [Mus musculus]	7	23	1	0	2.36984e+06	2.56419e+06	1.15697e+06	0	0	6	7	4	6
8393627	IRF3	Interferon regulatory factor, conserved site|Interferon regulatory factor|SMAD/FHA domain|Winged helix-turn-helix transcription repressor DNA-binding|SMAD domain-like|Interferon regulatory factor-3	Irf3	interferon regulatory factor 3 [Mus musculus]	7	32	7	0	1.98205e+07	2.66575e+07	1.54277e+07	1.96765e+07	0	9	9	6	8
31982421	YY1	Zinc finger, C2H2-type|Zinc finger, C2H2-type/integrase, DNA-binding|Zinc finger, C2H2-like|Transcription factor yin/yang	Yy1	transcriptional repressor protein YY1 [Mus musculus]	7	30	7	2.11026e+06	1.37834e+07	1.22727e+07	5.5918e+07	1.20064e+07	0	9	10	4	8
262331578	HMGA1	HMG-I/HMG-Y, DNA-binding, conserved site|AT hook, DNA-binding motif|High mobility group, HMG-I/HMG-Y|A.T hook-like	Hmga1	high mobility group protein HMG-I/HMG-Y isoform a [Mus musculus]	5	23	5	0	1.07946e+07	1.29053e+07	1.46511e+07	7.18985e+07	0	4	0	0	11
161016831	NFYA	CCAAT-binding factor, conserved site|CCAAT-binding transcription factor, subunit B	Nfya	nuclear transcription factor Y subunit alpha isoform a [Mus musculus]	2	9	2	0	0	1.42752e+06	6.56119e+06	1.87511e+07	0	0	1	3	5
257196177	ZNF512B	Zinc finger, C2H2-type|Zinc finger, C2H2-like	Znf512b	zinc finger protein 512B [Mus musculus]	4	15	4	0	4.1733e+06	3.93203e+06	9.23077e+06	7.8559e+06	0	3	4	4	6
21314854	GATAD2B	Zinc finger, GATA-type	Gatad2b	transcriptional repressor p66-beta [Mus musculus]	5	15	5	0	7.8203e+06	3.86711e+06	2.38553e+06	8.21045e+06	0	2	4	1	8
37674207	GZF1	BTB/POZ-like|Zinc finger, C2H2-type|BTB/POZ fold|BTB/POZ|Zinc finger, C2H2-type/integrase, DNA-binding|Zinc finger, C2H2-like	Gzf1	GDNF-inducible zinc finger protein 1 [Mus musculus]	5	13	5	1.0909e+06	1.7329e+06	2.54144e+06	2.08186e+06	2.27581e+06	1	3	2	3	3
6754538	LHX2	Homeobox, conserved site|Homeobox|Zinc finger, LIM-type|Homeodomain-like|Homeodomain-related	Lhx2	LIM/homeobox protein Lhx2 [Mus musculus]	5	11	5	0	3.87623e+06	6.88643e+06	2.94082e+06	1.10469e+07	0	0	4	0	4
8393832	NFIL3	Basic-leucine zipper (bZIP) transcription factor|Vertebrate interleukin-3 regulated transcription factor|Basic leucine zipper|Transcription factor, basic leucine zipper, E4BP4	Nfil3	nuclear factor interleukin-3-regulated protein [Mus musculus]	7	13	7	0	1.38154e+07	9.38059e+06	1.75948e+06	3.36086e+07	0	5	6	1	2
114326538	NFYC	Transcription factor CBF/NF-Y/archaeal histone|Histone-fold	Nfyc	nuclear transcription factor Y subunit gamma isoform 1 [Mus musculus]	4	9	4	0	0	4.7865e+06	1.2522e+07	4.01156e+07	0	0	1	2	6
124487369	ZFP362	Zinc finger, C2H2-type|Zinc finger, C2H2-type/integrase, DNA-binding|Zinc finger, C2H2-like	Zfp362	zinc finger protein 362 [Mus musculus]	3	21	1	0	1.87057e+06	1.97012e+06	0	1.97901e+06	0	1	2	0	2
91598896	MTA1	Zinc finger, GATA-type|ELM2|SANT, DNA-binding|Bromo adjacent homology (BAH) domain|Homeodomain-like|SANT, eukarya	Mta1	metastasis-associated protein MTA1 [Mus musculus]	5	12	4	0	409911	522345	792164	2.66626e+06	0	4	2	0	4
153792362	ELK4	Ets|Winged helix-turn-helix transcription repressor DNA-binding	Elk4	ETS domain-containing protein Elk-4 [Mus musculus]	6	13	6	0	0	0	1.65591e+07	3.62767e+07	0	0	0	3	11
41406074	HMGN1	High mobility group protein HMG14/HMG17	Hmgn1	non-histone chromosomal protein HMG-14 [Mus musculus]	3	13	3	244491	1.49861e+07	9.0499e+06	6.91845e+06	6.02385e+06	1	3	3	3	3
347658945	REPIN1	Zinc finger, C2H2-type|Zinc finger, C2H2-type/integrase, DNA-binding|Zinc finger, C2H2-like	Repin1	replication initiator 1 isoform c [Mus musculus]	3	10	3	0	4.32901e+06	3.33626e+06	3.46795e+06	4.42854e+06	0	2	4	3	1
13775156	XBP1	Basic-leucine zipper (bZIP) transcription factor|Basic leucine zipper	Xbp1	X-box-binding protein 1 isoform XBP1(U) [Mus musculus]	5	18	1	0	1.95967e+06	7.9942e+06	1.26239e+06	7.01849e+06	0	1	8	1	4
255759921	NFATC1	Cell surface receptor IPT/TIG|p53-like transcription factor, DNA-binding|Rel homology|Immunoglobulin-like fold|Immunoglobulin E-set|Nuclear factor of activated T cells (NFAT), subgroup|Nuclear factor of activated T cells (NFAT)|Nuclear factor of activated T-cells 1	Nfatc1	nuclear factor of activated T-cells, cytoplasmic 1 isoform 4 [Mus musculus]	3	10	2	0	4.12958e+06	2.24184e+06	798060	5.16734e+06	0	3	3	2	2
19526802	ERG	Ets|Sterile alpha motif/pointed|Sterile alpha motif homology|Winged helix-turn-helix transcription repressor DNA-binding|Sterile alpha motif-type	Erg	transcriptional regulator ERG [Mus musculus]	3	7	3	0	1.08144e+06	1.55929e+06	1.00766e+07	1.61721e+07	0	1	2	3	4
226874810	MLX	Helix-loop-helix DNA-binding domain|Helix-loop-helix DNA-binding	Mlx	max-like protein X isoform gamma [Mus musculus]	4	10	4	0	3.63332e+06	5.87653e+06	2.21045e+06	2.83584e+06	0	2	5	1	2
166706891	TCF20	Zinc finger, PHD-type	Tcf20	transcription factor 20 isoform a [Mus musculus]	4	17	4	0	4.88536e+06	6.95576e+06	2461876	5.10111e+06	0	3	9	1	5
45598394	NR2F2	Nuclear hormone receptor, ligand-binding, core|Zinc finger, nuclear hormone receptor-type|Nuclear hormone receptor, ligand-binding|Zinc finger, NHR/GATA-type|Zinc finger, C4-type, C-terminal domain|Steroid hormone receptor|Transcription factor COUP	Nr2f2	COUP transcription factor 2 isoform 1 [Mus musculus]	5	18	4	0	6.85663e+06	1.98283e+07	4.39949e+06	1.35209e+07	0	0	8	0	4
194328715	ZFP207	Zinc finger, C2H2-type|Zinc finger, C2H2-like	Zfp207	zinc finger protein 207 isoform 1 [Mus musculus]	3	15	3	0	2.28532e+07	2.82796e+07	1.5079e+07	3.67384e+07	1	4	4	4	2
164663880	PPARA	Nuclear hormone receptor, ligand-binding, core|Zinc finger, nuclear hormone receptor-type|Nuclear hormone receptor, ligand-binding|Zinc finger, NHR/GATA-type|Steroid hormone receptor|Peroxisome proliferator-activated receptor|Peroxisome proliferator-activated receptor, alpha	Ppara	peroxisome proliferator-activated receptor alpha [Mus musculus]	4	7	4	0	2.94656e+06	0	1.52608e+06	1.48334e+06	0	2	1	4	1
196049391	TEAD3	TEA/ATTS|Transcriptional enhancer factor	Tead3	transcriptional enhancer factor TEF-5 isoform 1 [Mus musculus]	5	11	2	0	1.57409e+06	1.72264e+06	0	746883	0	3	5	0	2
117414176	VEZF1	Zinc finger, C2H2-type|Zinc finger, C2H2-type/integrase, DNA-binding|Zinc finger, C2H2-like	Vezf1	vascular endothelial zinc finger 1 [Mus musculus]	3	21	2	0	5.43443e+06	1.29267e+07	3.65138e+06	1.04924e+07	0	4	6	4	6
66793398	FOXA1	Transcription factor, fork head, conserved site|Transcription factor, fork head|Winged helix-turn-helix transcription repressor DNA-binding|Fork-head N-terminal|Forkhead box protein, C-terminal	Foxa1	hepatocyte nuclear factor 3-alpha [Mus musculus]	3	6	3	0	0	1.72777e+06	0	1.23506e+07	0	0	3	0	3
40254249	NFRKB	-	Nfrkb	nuclear factor related to kappa-B-binding protein [Mus musculus]	5	5	5	0	3.07077e+06	1.79176e+06	0	0	0	3	2	0	1
61966683	CEBPG	Basic-leucine zipper (bZIP) transcription factor|Basic leucine zipper	Cebpg	CCAAT/enhancer-binding protein gamma [Mus musculus]	3	8	3	0	1.21295e+07	1.87067e+07	0	2.41923e+07	0	2	3	0	3
83921568	NR1I3	Nuclear hormone receptor, ligand-binding, core|Zinc finger, nuclear hormone receptor-type|Nuclear hormone receptor, ligand-binding|Zinc finger, NHR/GATA-type|Vitamin D receptor|Steroid hormone receptor|Thyroid hormone receptor	Nr1i3	nuclear receptor subfamily 1 group I member 3 isoform 1 [Mus musculus]	5	16	5	1.89729e+06	7.47159e+06	5.05672e+06	5.49485e+06	4.34843e+06	1	5	2	4	4
38348308	RYBP	Zinc finger, RanBP2-type	Rybp	RING1 and YY1-binding protein [Mus musculus]	2	5	2	0	0	4.05975e+06	1.18406e+06	6.31785e+06	0	0	2	1	2
8394435	TEF	Basic-leucine zipper (bZIP) transcription factor|Basic leucine zipper	Tef	thyrotroph embryonic factor isoform 1 [Mus musculus]	6	11	2	0	4.53713e+06	2.74369e+06	0	0	0	2	5	0	0
133904142	TERF2	SANT, DNA-binding|Homeodomain-like|Homeodomain-related|Telomere repeat-binding factor, dimerisation domain|Myb, DNA-binding|HTH transcriptional regulator, Myb-type, DNA-binding|Telomeric repeat-binding factor 1, Pin2	Terf2	telomeric repeat-binding factor 2 isoform 1 [Mus musculus]	4	7	4	0	2.14001e+06	215180	542549	532817	0	3	1	1	2
12963705	ELF2	Ets|Winged helix-turn-helix transcription repressor DNA-binding|Transcription factor Elf-1, N-terminal	Elf2	ETS-related transcription factor Elf-2 [Mus musculus]	3	6	3	0	0	739846	0	4.60058e+06	0	0	3	1	4
226958409	TEF	Basic-leucine zipper (bZIP) transcription factor|Basic leucine zipper	Tef	thyrotroph embryonic factor isoform 2 [Mus musculus]	5	8	1	0	0	0	0	2.07485e+06	0	0	0	0	3
169234810	ZFP292	Zinc finger, C2H2-type|Zinc finger, C2H2-like	Zfp292	zinc finger protein 292 [Mus musculus]	2	4	2	0	0	3.79764e+06	0	1.64309e+06	0	0	2	0	2
159032064	SALL1	Zinc finger, C2H2-type|Zinc finger, C2H2-type/integrase, DNA-binding|Zinc finger, C2H2-like	Sall1	sal-like protein 1 [Mus musculus]	2	5	2	0	2.483e+06	3.27046e+06	1.89614e+06	3.46287e+06	0	1	1	1	2
27753981	SREBF1	Helix-loop-helix DNA-binding domain|Helix-loop-helix DNA-binding	Srebf1	sterol regulatory element-binding protein 1 precursor [Mus musculus]	4	4	4	0	0	3.18066e+06	0	0	0	0	4	0	0
19745144	CREB1	Coactivator CBP, pKID|Basic-leucine zipper (bZIP) transcription factor|bZIP transcription factor, bZIP-1|cAMP response element binding (CREB) protein	Creb1	cyclic AMP-responsive element-binding protein 1 isoform B [Mus musculus]	3	13	3	0	5.0264e+06	1.3021e+07	5.49964e+06	8.80945e+06	1	3	2	2	3
255982546	NRF1	Nuclear respiratory factor-1, activation binding domain|Nuclear respiratory factor 1, NLS/DNA-binding, dimerisation domain	Nrf1	nuclear respiratory factor 1 isoform b [Mus musculus]	4	7	4	0	5.11668e+06	4.62119e+06	2.41313e+06	4.48414e+06	0	2	2	1	2
46909571	GATA6	Zinc finger, GATA-type|GATA-type transcription activator, N-terminal|Zinc finger, NHR/GATA-type	Gata6	transcription factor GATA-6 [Mus musculus]	2	3	2	0	0	3.18164e+06	0	0	0	0	3	0	0
117647238	ZBTB7A	BTB/POZ-like|Zinc finger, C2H2-type|BTB/POZ fold|BTB/POZ|Zinc finger, C2H2-type/integrase, DNA-binding|Zinc finger, C2H2-like	Zbtb7a	zinc finger and BTB domain-containing protein 7A [Mus musculus]	2	4	2	0	0	600225	4.14247e+06	0	0	1	1	1	1
82546826	FOXK1	Transcription factor, fork head, conserved site|Forkhead-associated|Transcription factor, fork head|SMAD/FHA domain	Foxk1	forkhead box protein K1 [Mus musculus]	3	8	3	0	1.62849e+06	5.05582e+06	1.15138e+06	5.7338e+06	0	1	5	1	4
113199769	NFATC3	Cell surface receptor IPT/TIG|p53-like transcription factor, DNA-binding|Rel homology|Immunoglobulin-like fold|Immunoglobulin E-set|Nuclear factor of activated T cells (NFAT), subgroup|Nuclear factor of activated T cells (NFAT)	Nfatc3	nuclear factor of activated T-cells, cytoplasmic 3 [Mus musculus]	2	3	1	0	2.51687e+06	0	0	0	0	1	0	0	0
172073171	TBP	Transcription factor TFIID, C-terminal/DNA glycosylase, N-terminal|Beta2-adaptin/TATA-box binding, C-terminal|TATA-box binding	Tbp	TATA-box-binding protein [Mus musculus]	4	15	4	0	1.0453e+07	4.40786e+07	0	4.24836e+07	0	3	5	0	5
162135948	ZFP160	Krueppel-associated box|Zinc finger, C2H2-type|Zinc finger, C2H2-type/integrase, DNA-binding|Zinc finger, C2H2-like	Zfp160	zinc finger protein 160 [Mus musculus]	2	14	1	0	641461	0	0	0	1	2	0	0	0
224809352	ZKSCAN3	Krueppel-associated box|Transcription regulator SCAN|Zinc finger, C2H2-type|Zinc finger, C2H2-type/integrase, DNA-binding|Zinc finger, C2H2-like	Zkscan3	zinc finger protein with KRAB and SCAN domains 3 [Mus musculus]	2	5	2	0	9.86587e+07	1.15005e+08	1.31013e+06	2.44212e+08	0	2	1	1	1
169646141	ZBTB44	BTB/POZ-like|Zinc finger, C2H2-type|BTB/POZ fold|BTB/POZ|Zinc finger, C2H2-type/integrase, DNA-binding|Zinc finger, C2H2-like	Zbtb44	zinc finger and BTB domain-containing protein 44 isoform a [Mus musculus]	3	7	3	586375	1.01153e+06	3.24353e+06	577947	2.90528e+06	2	2	1	1	1
34328263	MLXIPL	Helix-loop-helix DNA-binding domain|Helix-loop-helix DNA-binding	Mlxipl	carbohydrate-responsive element-binding protein [Mus musculus]	2	3	2	0	0	6.27355e+06	0	4.5508e+06	0	0	1	0	2
6680231	HMGB3	HMG box A DNA-binding domain, conserved site|High mobility group, HMG1/HMG2, subgroup|High mobility group, HMG1/HMG2|High mobility group, superfamily	Hmgb3	high mobility group protein B3 [Mus musculus]	2	5	2	0	0	1.09085e+07	1.16446e+07	1.41591e+07	0	0	2	1	2
294979205	WIZ	Zinc finger, C2H2-type|Zinc finger, C2H2-like	Wiz	protein Wiz isoform 1 [Mus musculus]	3	5	3	0	1.04511e+06	2.94568e+06	0	2.1792e+06	0	1	2	0	4
112807199	NR2F6	Nuclear hormone receptor, ligand-binding, core|Zinc finger, nuclear hormone receptor-type|Nuclear hormone receptor, ligand-binding|Zinc finger, NHR/GATA-type|Zinc finger, C4-type, C-terminal domain|Steroid hormone receptor|Transcription factor COUP	Nr2f6	nuclear receptor subfamily 2 group F member 6 [Mus musculus]	3	9	2	0	0	7.70091e+06	0	1.81322e+06	0	0	3	0	3
114155153	MAZ	Zinc finger, C2H2-type|Zinc finger, C2H2-type/integrase, DNA-binding|Zinc finger, C2H2-like	Maz	myc-associated zinc finger protein [Mus musculus]	2	11	1	0	0	833201	0	0	0	0	4	0	0
27754097	DR1	Transcription factor CBF/NF-Y/archaeal histone|Histone-fold|Transcription factor, CBFA/NFYB, DNA topoisomerase	Dr1	protein Dr1 [Mus musculus]	2	2	2	0	0	0	0	7.62438e+06	0	0	0	0	2
74136557	ARID5B	ARID/BRIGHT DNA-binding domain	Arid5b	AT-rich interactive domain-containing protein 5B [Mus musculus]	3	4	3	0	0	1.45509e+06	0	2.29559e+06	0	0	1	0	4
110835729	CUX1	Homeobox, conserved site|Homeobox|Homeodomain protein CUT|Homeodomain-like|Homeodomain-related|CASP, C-terminal	Cux1	protein CASP isoform a [Mus musculus]	3	3	3	0	0	1.14918e+06	0	2.43551e+06	0	0	1	0	2
33468913	NR1I2	Nuclear hormone receptor, ligand-binding, core|Zinc finger, nuclear hormone receptor-type|Nuclear hormone receptor, ligand-binding|Zinc finger, NHR/GATA-type|Vitamin D receptor|Steroid hormone receptor	Nr1i2	nuclear receptor subfamily 1 group I member 2 isoform 1 [Mus musculus]	2	2	2	0	958578	0	2.01728e+06	0	0	1	0	1	0
133778915	HMGN5	High mobility group protein HMG14/HMG17	Hmgn5	high mobility group nucleosome-binding domain-containing protein 5 [Mus musculus]	3	5	3	0	0	437156	627443	0	0	2	0	2	0
34365779	PBX1	Homeobox, conserved site|Homeobox|PBX|Homeodomain-like|Homeodomain-related	Pbx1	pre-B-cell leukemia transcription factor 1 isoform a [Mus musculus]	2	4	1	0	0	1.25743e+07	0	0	0	1	3	0	0
8567384	PBX2	Homeobox, conserved site|Homeobox|PBX|Homeodomain-like|Homeodomain-related	Pbx2	pre-B-cell leukemia transcription factor 2 [Mus musculus]	2	4	1	0	0	862130	0	0	0	0	2	0	0
6753774	ESRRG	Nuclear hormone receptor, ligand-binding, core|Zinc finger, nuclear hormone receptor-type|Nuclear hormone receptor, ligand-binding|Zinc finger, NHR/GATA-type|Retinoid X receptor|Steroid hormone receptor	Esrrg	estrogen-related receptor gamma isoform1 [Mus musculus]	3	3	3	0	0	2.09931e+06	0	0	0	0	3	0	0
126157488	ZFP800	Zinc finger, C2H2-type|Zinc finger, C2H2-like	Zfp800	zinc finger protein 800 [Mus musculus]	3	7	3	3.37736e+06	4.13337e+06	3.08889e+06	4.9461e+06	3.5416e+06	1	2	1	1	2
34328255	FOXO1	Transcription factor, fork head, conserved site|Transcription factor, fork head|Winged helix-turn-helix transcription repressor DNA-binding	Foxo1	forkhead box protein O1 [Mus musculus]	2	2	2	0	0	811572	0	0	0	1	1	1	0
119226255	SP1	Zinc finger, C2H2-type|Zinc finger, C2H2-type/integrase, DNA-binding|Zinc finger, C2H2-like	Sp1	transcription factor Sp1 [Mus musculus]	1	7	1	0	1.91225e+06	1.61061e+06	2.02291e+06	3.85722e+06	0	1	1	2	2
21313424	DRAP1	Transcription factor CBF/NF-Y/archaeal histone|Histone-fold	Drap1	dr1-associated corepressor [Mus musculus]	2	6	2	0	5.07527e+06	1.98455e+07	0	1.64292e+07	0	1	3	0	2
110347410	CEBPD	Basic-leucine zipper (bZIP) transcription factor|Basic leucine zipper|CCAAT/enhancer-binding	Cebpd	CCAAT/enhancer-binding protein delta [Mus musculus]	1	2	1	0	1.64245e+07	1.02746e+07	0	0	0	1	1	0	0
65301157	SP3	Zinc finger, C2H2-type|Zinc finger, C2H2-type/integrase, DNA-binding|Zinc finger, C2H2-like	Sp3	transcription factor Sp3 isoform 1 [Mus musculus]	1	2	1	0	790229	0	0	0	0	2	0	0	0
40254353	ZFP319	Zinc finger, C2H2-type|Zinc finger, C2H2-type/integrase, DNA-binding|Zinc finger, C2H2-like	Zfp319	zinc finger protein 319 [Mus musculus]	2	13	1	0	0	382955	0	0	0	0	1	0	0
171846245	NR2C1	Nuclear hormone receptor, ligand-binding, core|Zinc finger, nuclear hormone receptor-type|Nuclear hormone receptor, ligand-binding|Zinc finger, NHR/GATA-type|Vitamin D receptor|Steroid hormone receptor	Nr2c1	nuclear receptor subfamily 2 group C member 1 [Mus musculus]	2	5	1	0	671435	8.70207e+06	0	0	0	1	4	0	0
31981130	KLF13	Zinc finger, C2H2-type|Zinc finger, C2H2-type/integrase, DNA-binding|Zinc finger, C2H2-like	Klf13	Krueppel-like factor 13 [Mus musculus]	1	1	1	0	0	0	0	0	0	1	0	0	0
15022805	HMG20A	High mobility group, HMG1/HMG2|High mobility group, superfamily	Hmg20a	high mobility group protein 20A [Mus musculus]	2	5	2	0	6.53922e+06	1.59212e+07	2.69876e+06	7.14714e+06	0	1	2	1	1
62177117	BAZ2B	Bromodomain, conserved site|Bromodomain|Methyl-CpG DNA binding|Zinc finger, PHD-type|DDT domain|Zinc finger, FYVE/PHD-type|DNA-binding, integrase-type|DDT domain, subgroup|DDT domain superfamily|Zinc finger, PHD-finger	Baz2b	bromodomain adjacent to zinc finger domain, 2B [Mus musculus]	1	1	1	0	0	319605	0	0	0	0	1	0	0
22507329	E2F4	Transcription factor E2F/dimerisation partner (TDP)|Winged helix-turn-helix transcription repressor DNA-binding|E2F Family	E2f4	transcription factor E2F4 [Mus musculus]	2	3	2	0	413364	1.63542e+06	0	0	0	0	2	0	0
121247453	NR3C1	Nuclear hormone receptor, ligand-binding, core|Glucocorticoid receptor|Zinc finger, nuclear hormone receptor-type|Nuclear hormone receptor, ligand-binding|Zinc finger, NHR/GATA-type|Steroid hormone receptor	Nr3c1	glucocorticoid receptor [Mus musculus]	2	6	2	0	1.98613e+06	702066	391966	0	0	3	2	1	0
6755680	BHLHE40	Helix-loop-helix DNA-binding domain|Orange|Helix-loop-helix DNA-binding|Orange subgroup	Bhlhe40	class E basic helix-loop-helix protein 40 [Mus musculus]	1	2	1	0	0	3.31823e+06	0	5.93311e+06	0	0	1	0	1
161086992	ZFP709	Krueppel-associated box|Zinc finger, C2H2-type|Zinc finger, C2H2-type/integrase, DNA-binding|Zinc finger, C2H2-like	Zfp709	zinc finger protein 709 [Mus musculus]	2	13	1	0	3.1623e+06	0	0	0	0	2	0	0	0
6754210	HMGA2	HMG-I/HMG-Y, DNA-binding, conserved site|AT hook, DNA-binding motif|High mobility group, HMG-I/HMG-Y|A.T hook-like	Hmga2	high mobility group protein HMGI-C [Mus musculus]	1	2	1	0	0	0	0	3.70638e+06	0	0	0	0	2
71037383	ZBTB43	BTB/POZ-like|Zinc finger, C2H2-type|BTB/POZ fold|BTB/POZ|Zinc finger, C2H2-type/integrase, DNA-binding|Zinc finger, C2H2-like	Zbtb43	zinc finger and BTB domain-containing protein 43 isoform a [Mus musculus]	2	3	2	0	3.22239e+06	0	0	3.69133e+06	0	2	0	0	1
254553274	ZFP746	Krueppel-associated box|Zinc finger, C2H2-type|Zinc finger, C2H2-type/integrase, DNA-binding|Zinc finger, C2H2-like|Protein of unknown function DUF3669, zinc finger protein	Zfp746	zinc finger protein 746 [Mus musculus]	1	1	1	0	0	0	0	942952	0	0	0	0	1
6754610	MAFG	Maf transcription factor|Basic-leucine zipper (bZIP) transcription factor|Eukaryotic transcription factor, Skn-1-like, DNA-binding	Mafg	transcription factor MafG [Mus musculus]	1	2	1	0	0	1.74276e+06	0	6.90354e+06	0	0	1	0	2
6678507	NR1H2	Nuclear hormone receptor, ligand-binding, core|Zinc finger, nuclear hormone receptor-type|Nuclear hormone receptor, ligand-binding|Zinc finger, NHR/GATA-type|Vitamin D receptor|Steroid hormone receptor	Nr1h2	oxysterols receptor LXR-beta [Mus musculus]	1	1	1	0	902883	0	0	0	0	1	0	0	0
31543307	NAB1	Nab1, C-terminal|Nab, N-terminal|NAB co-repressor, conserved region 2	Nab1	NGFI-A-binding protein 1 [Mus musculus]	1	1	1	0	0	1.1169e+06	0	0	0	0	2	0	0
31982165	IKZF5	Zinc finger, C2H2-type|Zinc finger, C2H2-like	Ikzf5	zinc finger protein Pegasus [Mus musculus]	2	6	2	3.47831e+06	2.53587e+06	0	1.82741e+06	2.36716e+06	1	1	0	1	2
27804319	ZKSCAN1	Krueppel-associated box|Transcription regulator SCAN|Zinc finger, C2H2-type|Zinc finger, C2H2-type/integrase, DNA-binding|Zinc finger, C2H2-like	Zkscan1	zinc finger protein with KRAB and SCAN domains 1 isoform 1 [Mus musculus]	2	2	2	0	0	0	0	0	0	0	0	1	1
90093349	ADNP	Homeobox|Zinc finger, C2H2-type|Homeodomain-like|Zinc finger, C2H2-like	Adnp	activity-dependent neuroprotector homeobox protein [Mus musculus]	1	1	1	0	0	3.0104e+06	0	0	0	0	1	0	0
161353485	ZFP187	Transcription regulator SCAN|Zinc finger, C2H2-type|Zinc finger, C2H2-type/integrase, DNA-binding|Zinc finger, C2H2-like	Zscan26	zinc finger and SCAN domain-containing protein 26 [Mus musculus]	1	5	1	3.37021e+06	2.56057e+06	4.23553e+06	5.15745e+06	5.12846e+06	1	1	1	1	1
153945880	EP400	SNF2-related|SANT, DNA-binding|DNA/RNA helicase, C-terminal|HSA|Homeodomain-like|HAS subgroup|DEAD-like helicase, N-terminal|Helicase/SANT-associated, DNA binding|Helicase, superfamily 1/2, ATP-binding domain|MYB-like	Ep400	E1A-binding protein p400 isoform 1 [Mus musculus]	1	2	1	0	1.20331e+06	0	0	0	0	1	1	0	0
71037397	RFX5	DNA-binding RFX|Winged helix-turn-helix transcription repressor DNA-binding	Rfx5	DNA-binding protein Rfx5 [Mus musculus]	1	1	1	0	0	0	0	0	0	0	1	0	0
12963561	KLF15	Zinc finger, C2H2-type|Zinc finger, C2H2-type/integrase, DNA-binding|Zinc finger, C2H2-like	Klf15	Krueppel-like factor 15 [Mus musculus]	1	3	1	0	0	1.05792e+06	954371	649216	0	0	1	1	1
153945804	FOXA2	Transcription factor, fork head, conserved site|Transcription factor, fork head|Winged helix-turn-helix transcription repressor DNA-binding|Fork-head N-terminal|Forkhead box protein, C-terminal	Foxa2	hepatocyte nuclear factor 3-beta [Mus musculus]	2	3	2	0	0	792187	0	2.28825e+06	0	0	1	0	2
114205435	BAZ2A	AT hook, DNA-binding motif|Bromodomain, conserved site|Bromodomain|Methyl-CpG DNA binding|Zinc finger, PHD-type|DDT domain|Zinc finger, FYVE/PHD-type|DNA-binding, integrase-type|DDT domain, subgroup|DDT domain superfamily|Zinc finger, PHD-finger	Baz2a	bromodomain adjacent to zinc finger domain protein 2A [Mus musculus]	1	1	1	0	957423	0	0	0	0	1	0	0	0
47059087	ZBTB7B	BTB/POZ-like|Zinc finger, C2H2-type|BTB/POZ fold|BTB/POZ|Zinc finger, C2H2-type/integrase, DNA-binding|Zinc finger, C2H2-like	Zbtb7b	zinc finger and BTB domain-containing protein 7B [Mus musculus]	1	1	1	0	0	0	0	0	0	0	0	0	1
110625908	NR1D1	Nuclear hormone receptor, ligand-binding, core|Zinc finger, nuclear hormone receptor-type|Nuclear hormone receptor, ligand-binding|Zinc finger, NHR/GATA-type|Vitamin D receptor|Steroid hormone receptor	Nr1d1	nuclear receptor subfamily 1 group D member 1 [Mus musculus]	1	3	1	0	875646	1.51648e+06	0	1.91429e+06	0	1	1	0	1
120300925	HOXB3	Homeobox protein, antennapedia type, conserved site|Homeobox, conserved site|Homeobox|Homeodomain-like|Homeodomain-related|Homeobox, region	Hoxb3	homeobox protein Hox-B3 [Mus musculus]	2	3	2	0	0	0	0	575988	0	1	1	0	1
30425348	ZFP446	Krueppel-associated box|Transcription regulator SCAN|Zinc finger, C2H2-type|Zinc finger, C2H2-type/integrase, DNA-binding|Zinc finger, C2H2-like	Zfp446	zinc finger protein 446 isoform 1 [Mus musculus]	1	1	1	0	0	0	0	0	0	0	1	0	0
6680582	KLF3	Zinc finger, C2H2-type|Zinc finger, C2H2-type/integrase, DNA-binding|Zinc finger, C2H2-like	Klf3	Krueppel-like factor 3 [Mus musculus]	1	1	1	0	2.3945e+06	0	0	0	0	1	0	0	0
6754850	NFYB	Transcription factor, NFYB/HAP3, conserved site|Transcription factor CBF/NF-Y/archaeal histone|Histone-fold|Transcription factor, CBFA/NFYB, DNA topoisomerase	Nfyb	nuclear transcription factor Y subunit beta [Mus musculus]	1	1	1	0	0	0	0	59566682	0	0	0	0	1
6679627	ELF1	Ets|Winged helix-turn-helix transcription repressor DNA-binding|Transcription factor Elf-1, N-terminal	Elf1	ETS-related transcription factor Elf-1 [Mus musculus]	1	1	1	0	0	0	0	0	0	0	0	0	1
46369479	CEBPE	Basic-leucine zipper (bZIP) transcription factor|Basic leucine zipper|CCAAT/enhancer-binding	Cebpe	CCAAT/enhancer-binding protein epsilon [Mus musculus]	1	2	1	0	0	3.61797e+06	0	0	0	0	2	0	0
165377130	ZFP276	Zinc finger, C2H2-type|Zinc finger, AD-type|Zinc finger, C2H2-type/integrase, DNA-binding|Zinc finger, C2H2-like	Zfp276	zinc finger protein 276 [Mus musculus]	1	1	1	0	0	0	163199	0	0	0	0	1	0
6677659	DNAJC2	Heat shock protein DnaJ, conserved site|SANT, DNA-binding|Heat shock protein DnaJ, N-terminal|Homeodomain-like|Myb, DNA-binding|SANT, eukarya|Molecular chaperone, heat shock protein, Hsp40, DnaJ	Dnajc2	dnaJ homolog subfamily C member 2 [Mus musculus]	1	1	1	0	0	0	0	517362	0	0	0	0	1
6680229	HMGB2	HMG box A DNA-binding domain, conserved site|High mobility group, HMG1/HMG2, subgroup|High mobility group, HMG1/HMG2|High mobility group, superfamily	Hmgb2	high mobility group protein B2 [Mus musculus]	1	1	1	0	0	0	0	5.06142e+06	0	0	0	0	1
31544063	ZFP260	Zinc finger, C2H2-type|Zinc finger, C2H2-type/integrase, DNA-binding|Zinc finger, C2H2-like	Zfp260	zinc finger protein 260 [Mus musculus]	1	2	1	0	1.81767e+06	1.73563e+06	0	0	0	1	1	0	0
70887767	HIC2	BTB/POZ-like|Zinc finger, C2H2-type|BTB/POZ fold|BTB/POZ|Zinc finger, C2H2-type/integrase, DNA-binding|Zinc finger, C2H2-like	Hic2	hypermethylated in cancer 2 protein [Mus musculus]	1	4	1	0	7.02511e+06	7.11386e+06	5.51193e+06	7.01968e+06	0	1	1	0	1
90669983	ZFP91	Zinc finger, C2H2-type|Zinc finger, C2H2-like	Zfp91	E3 ubiquitin-protein ligase ZFP91 [Mus musculus]	1	1	1	0	0	401208	0	0	0	0	1	0	0
293336061	RARA	Nuclear hormone receptor, ligand-binding, core|Zinc finger, nuclear hormone receptor-type|Nuclear hormone receptor, ligand-binding|Steroid hormone receptor|Retinoic acid receptor	Rara	retinoic acid receptor alpha isoform 1 [Mus musculus]	1	1	1	0	0	0	0	0	0	0	1	0	0
253683481	HMG20B	High mobility group, HMG1/HMG2, subgroup|High mobility group, HMG1/HMG2|High mobility group, superfamily	Hmg20b	SWI/SNF-related matrix-associated actin-dependent regulator of chromatin subfamily E member 1-related [Mus musculus]	1	1	1	0	0	0	0	0	0	0	0	0	1
6677853	NKX1-2	Homeobox, conserved site|Homeobox|Homeodomain-like|Homeodomain-related|Homeobox, region	Nkx1-2	NK1 transcription factor-related protein 2 [Mus musculus]	1	4	1	0	0	4.48079e+07	99158427	0	0	0	2	2	0
31982951	HLF	Basic-leucine zipper (bZIP) transcription factor|Basic leucine zipper	Hlf	hepatic leukemia factor [Mus musculus]	1	1	1	0	0	3.93774e+06	0	0	0	0	1	0	0
29244118	ZFP637	Zinc finger, C2H2-type|Zinc finger, C2H2-type/integrase, DNA-binding|Zinc finger, C2H2-like	Zfp637	zinc finger protein 32 [Mus musculus]	1	1	1	765806	0	0	0	0	2	0	0	0	0
16716509	FOXP1	Transcription factor, fork head, conserved site|Transcription factor, fork head|Winged helix-turn-helix transcription repressor DNA-binding|Zinc finger, C2H2-like	Foxp1	forkhead box protein P1 isoform 1 [Mus musculus]	1	1	1	0	0	0	0	0	0	0	0	0	1
298676444	TADA2B	Zinc finger, ZZ-type|SANT, DNA-binding|Homeodomain-like|Myb, DNA-binding|SANT, eukarya|Transcriptional adaptor 2	Tada2b	transcriptional adaptor 2B [Mus musculus]	1	3	1	0	0	2.67391e+06	3.00884e+06	6.08836e+06	0	0	0	1	1
128485774	STAT6	SH2 motif|p53-like transcription factor, DNA-binding|EF-hand-like domain|STAT transcription factor, DNA-binding, subdomain|STAT transcription factor, protein interaction|STAT transcription factor, all-alpha|STAT transcription factor, DNA-binding|STAT transcription factor, coiled coil|STAT transcription factor, core	Stat6	signal transducer and transcription activator 6 [Mus musculus]	1	1	1	0	0	0	0	0	0	1	0	0	0
120587007	BCL11B	Zinc finger, C2H2-type|Zinc finger, C2H2-type/integrase, DNA-binding|Zinc finger, C2H2-like	Bcl11b	B-cell lymphoma/leukemia 11B isoform a [Mus musculus]	1	4	1	8.02006e+07	1.18399e+08	6.71161e+07	187704438	0	1	1	1	0	0

## Sheet: Liver TF heatmap
	Pck1p-Fast	Pck1p-refed	G6pc-Fast	G6pc-Refed
ONECUT1	603769	1.77754e+08	168577994	4.68584e+08
ZBTB20	5.61899e+07	1.15554e+08	6.13487e+07	536900745
NFIC	6.74264e+07	1.9473e+08	5.73006e+07	2.0255e+08
HNF4A	9.64729e+07	2.08765e+08	5.8613e+07	1.99275e+08
ZKSCAN3	9.86587e+07	1.15005e+08	1.31013e+06	2.44212e+08
AHCTF1	5.67685e+07	1.23443e+08	6.38527e+07	2.23204e+08
NFIX	6.16589e+07	1.18393e+08	8.22172e+07	171180746
HNF1A	2.94103e+07	8.40753e+07	3.76535e+07	1.75908e+08
ONECUT2	1.51923e+07	4.15367e+07	6.30909e+07	2.17675e+08
BCL11B	3.81984e+07	-1.30845e+07	1.07504e+08	-8.02006e+07
YBX1	6.46956e+07	92387553	3.57155e+07	3.16562e+07
CDC5L	6.69619e+07	6.0827e+07	8.18251e+07	6.7838e+07
SMARCA5	4.27976e+07	1.87168e+07	1.06904e+08	7.82292e+07
NR5A2	7.88562e+06	4.16026e+07	6.41536e+07	1.10242e+08
NFIB	4.24539e+07	7.46188e+07	4.64248e+07	1.17299e+08
NFIA	5.91532e+07	1.03732e+08	4.25994e+07	9.51684e+07
NKX1-2	0	4.48079e+07	99158427	0
HMBOX1	5.2854e+06	4.62526e+07	3.29409e+06	2.05286e+07
TFE3	1.41011e+07	5.50459e+07	0	6.87251e+06
TFAP4	5.4114e+06	4.84559e+07	0	3.41971e+06
ZFP148	1.25474e+07	4.7538e+07	1.12826e+06	2.47987e+06
TFEB	1.30705e+07	3.76147e+07	0	8.49214e+06
DBP	3.58323e+06	3.20202e+07	0	1.50326e+06
CTCF	7.48642e+06	3.85984e+07	9.67363e+06	1.70247e+06
CEBPD	1.64245e+07	1.02746e+07	0	0
HMGN1	1.47416e+07	8.80541e+06	6.67396e+06	5.77936e+06
FOXA1	0	1.72777e+06	0	1.23506e+07
ZBTB45	0	0	0	1.20034e+07
NFYA	0	1.42752e+06	6.56119e+06	1.87511e+07
ERG	1.08144e+06	1.55929e+06	1.00766e+07	1.61721e+07
HMGB3	0	1.09085e+07	1.16446e+07	1.41591e+07
HMG20A	6.53922e+06	1.59212e+07	2.69876e+06	7.14714e+06
CREB1	5.0264e+06	1.3021e+07	5.49964e+06	8.80945e+06
VEZF1	5.43443e+06	1.29267e+07	3.65138e+06	1.04924e+07
PROX1	4.42131e+06	1.00909e+07	7.67973e+06	1.16524e+07
ARID1A	9.80402e+06	9.91774e+06	5.89989e+06	1.14258e+07
HNF1B	1.33744e+06	7.81786e+06	1.73382e+06	1.24714e+07
LHX2	3.87623e+06	6.88643e+06	2.94082e+06	1.10469e+07
ZFP384	4.66841e+06	7.76757e+06	3.57689e+06	1.23657e+07
ZNF512B	4.1733e+06	3.93203e+06	9.23077e+06	7.8559e+06
HIC2	7.02511e+06	7.11386e+06	5.51193e+06	7.01968e+06
GATAD2B	7.8203e+06	3.86711e+06	2.38553e+06	8.21045e+06
PBX1	0	1.25743e+07	0	0
NR2C2	1.01056e+06	1.7311e+07	0	863435
CEBPZ	5.31551e+06	-3.99851e+06	4.49796e+06	-4.05282e+06
GATAD2A	9.64061e+06	1.73478e+06	0	3.77208e+06
ARID1B	7.93372e+06	5.62103e+06	0	0
TEF	4.53713e+06	2.74369e+06	0	0
NR2C1	671435	8.70207e+06	0	0
NR2F6	0	7.70091e+06	0	1.81322e+06
TEAD1	0	5.8683e+06	0	862719
ZBTB7A	0	600225	4.14247e+06	0
NOC3L	1.93708e+06	-631396	6.14762e+06	-1.99625e+06
IKZF5	-942438	-3.47831e+06	-1.6509e+06	-1.11114e+06
CSDA	0	4.67259e+06	0	0
ADNP	0	3.0104e+06	0	0
GATA6	0	3.18164e+06	0	0
SREBF1	0	3.18066e+06	0	0
CEBPE	0	3.61797e+06	0	0
HLF	0	3.93774e+06	0	0
ZFP362	1.87057e+06	1.97012e+06	0	1.97901e+06
ZFP292	0	3.79764e+06	0	1.64309e+06
ZBTB44	425156	2.65716e+06	-8427.58	2.3189e+06
WIZ	1.04511e+06	2.94568e+06	0	2.1792e+06
ZFP187	-809640	865314	1.78724e+06	1.75825e+06
NR1D1	875646	1.51648e+06	0	1.91429e+06
FOXA2	0	792187	0	2.28825e+06
ARID5B	0	1.45509e+06	0	2.29559e+06
CUX1	0	1.14918e+06	0	2.43551e+06
TEF	0	0	0	2.07485e+06
MTA1	409911	522345	792164	2.66626e+06
NR1I2	958578	0	2.01728e+06	0
ZFP800	756017	-288471	1.56874e+06	164248
ZFP637	-765806	-765806	-765806	-765806
EP400	1.20331e+06	0	0	0
ZFP160	641461	0	0	0
SP3	790229	0	0	0
BAZ2A	957423	0	0	0
NR1H2	902883	0	0	0
NAB1	0	1.1169e+06	0	0
PBX2	0	862130	0	0
FOXO1	0	811572	0	0
MAZ	0	833201	0	0
HMGN5	0	437156	627443	0
BAZ2B	0	319605	0	0
ZFP319	0	382955	0	0
ZFP91	0	401208	0	0
ZFP276	0	0	163199	0
ZKSCAN1	0	0	0	0
ZFP446	0	0	0	0
ZBTB7B	0	0	0	0
STAT6	0	0	0	0
RXRB	0	0	0	0
RFX5	0	0	0	0
RARA	0	0	0	0
KLF13	0	0	0	0
HMG20B	0	0	0	0
ELF1	0	0	0	0
FOXP1	0	0	0	0
ZFP746	0	0	0	942952
DNAJC2	0	0	0	517362
HOXB3	0	0	0	575988
ESRRG	0	2.09931e+06	0	0
E2F4	413364	1.63542e+06	0	0
GZF1	641998	1.45054e+06	990955	1.1849e+06
KLF15	0	1.05792e+06	954371	649216
ZFP655	665866	635719	819873	442058
PPARA	2.94656e+06	0	1.52608e+06	1.48334e+06
ZFP709	3.1623e+06	0	0	0
KLF3	2.3945e+06	0	0	0
NFATC3	2.51687e+06	0	0	0
NR3C1	1.98613e+06	702066	391966	0
TERF2	2.14001e+06	215180	542549	532817
SMARCC1	2.36984e+06	2.56419e+06	1.15697e+06	0
NFRKB	3.07077e+06	1.79176e+06	0	0
TEAD3	1.57409e+06	1.72264e+06	0	746883
ZFP260	1.81767e+06	1.73563e+06	0	0
NFATC1	4.12958e+06	2.24184e+06	798060	5.16734e+06
SP1	1.91225e+06	1.61061e+06	2.02291e+06	3.85722e+06
ZBTB43	3.22239e+06	0	0	3.69133e+06
TCF20	4.88536e+06	6.95576e+06	2461876	5.10111e+06
NR1I3	5.5743e+06	3.15943e+06	3.59756e+06	2.45114e+06
MLX	3.63332e+06	5.87653e+06	2.21045e+06	2.83584e+06
DMAP1	2.6072e+06	4.38097e+06	3.1557e+06	4.09555e+06
SALL1	2.483e+06	3.27046e+06	1.89614e+06	3.46287e+06
NRF1	5.11668e+06	4.62119e+06	2.41313e+06	4.48414e+06
TERF2IP	4066680	3.57421e+06	2.86661e+06	3.52947e+06
REPIN1	4.32901e+06	3.33626e+06	3.46795e+06	4.42854e+06
GABPA	0	0	2.77358e+06	7.20597e+06
TADA2B	0	2.67391e+06	3.00884e+06	6.08836e+06
HMGA2	0	0	0	3.70638e+06
ELF2	0	739846	0	4.60058e+06
HMGB2	0	0	0	5.06142e+06
DR1	0	0	0	7.62438e+06
MAFG	0	1.74276e+06	0	6.90354e+06
XBP1	1.95967e+06	7.9942e+06	1.26239e+06	7.01849e+06
MLXIPL	0	6.27355e+06	0	4.5508e+06
FOXK1	1.62849e+06	5.05582e+06	1.15138e+06	5.7338e+06
RYBP	0	4.05975e+06	1.18406e+06	6.31785e+06
BHLHE40	0	3.31823e+06	0	5.93311e+06
RXRG	0	4.60641e+06	0	5.67615e+06
DRAP1	5.07527e+06	1.98455e+07	0	1.64292e+07
NR2F2	6.85663e+06	1.98283e+07	4.39949e+06	1.35209e+07
TBX3	6.20361e+06	2.64334e+07	2.28448e+06	10152805
ZFHX3	2.25464e+06	2.21686e+07	0	1.03235e+07
ARNTL	4.89043e+06	2.04474e+07	3.96797e+06	8.34811e+06
CLOCK	6.04947e+06	2.25784e+07	2.68036e+06	7.64658e+06
NR1H4	4.14756e+06	2.54971e+07	3.6687e+06	2.23296e+07
ESRRA	1.05391e+07	3.16015e+07	3.2156e+06	1.73175e+07
IRF3	1.98205e+07	2.66575e+07	1.54277e+07	1.96765e+07
SMARCC2	2.56485e+07	2.06658e+07	1.47153e+07	1.69949e+07
TOX4	1.89515e+07	1.97731e+07	7.05485e+06	1.66555e+07
MTA2	1.61031e+07	1.25974e+07	7.03539e+06	1.37191e+07
SMARCE1	1.67687e+07	1.63117e+07	1.05994e+07	1.17783e+07
UBP1	1.35794e+07	1.90082e+07	8.99051e+06	1.25022e+07
RBPJ	1.58423e+07	1.88619e+07	7.14198e+06	1.21592e+07
ZFX	9.65363e+06	1.4746e+07	1.21289e+07	1.14815e+07
GCFC1	1.15074e+07	1.31149e+07	1.81607e+07	1.68826e+07
ELK4	0	0	1.65591e+07	3.62767e+07
NFYC	0	4.7865e+06	1.2522e+07	4.01156e+07
TCF7L2	0	1.5301e+07	1.02721e+07	3.40473e+07
ZHX2	5.89522e+06	1.20977e+07	6.03324e+06	4.11587e+07
ZHX1	0	3.83266e+06	2.07257e+06	2.77114e+07
ZHX3	4.15413e+06	6.83507e+06	2.59611e+06	2.44273e+07
NFIL3	1.38154e+07	9.38059e+06	1.75948e+06	3.36086e+07
RREB1	7.06422e+06	1.80501e+07	2.33343e+06	2.76681e+07
CEBPG	1.21295e+07	1.87067e+07	0	2.41923e+07
YY1	1.16731e+07	1.01624e+07	5.38077e+07	9.89618e+06
ZFP512	1.93034e+07	1.07536e+06	3.06124e+07	5.41941e+06
ZFP422	5.92999e+06	-9.14908e+06	2.37717e+07	-5.10782e+06
NFYB	0	0	0	59566682
HMGA1	1.07946e+07	1.29053e+07	1.46511e+07	7.18985e+07
GATA4	2.46205e+07	6.71917e+07	1.03062e+07	3.08509e+07
RXRA	3.88831e+07	5.79364e+07	2.51426e+07	3.73508e+07
TBP	1.0453e+07	4.40786e+07	0	4.24836e+07
ZFP207	2.28532e+07	2.82796e+07	1.5079e+07	3.67384e+07
PDS5B	4.58751e+07	5.38614e+07	4.10094e+07	6.43485e+07
UBTF	3.88425e+07	2.761e+07	4.80111e+07	3.87966e+07
CEBPB	3.67986e+08	2.36003e+08	104725828	1.44118e+08
DLX1	3.49633e+08	0	0	0
CEBPA	3.29124e+08	8.12929e+08	9.36627e+07	3.75374e+08
TFAM	5.92456e+08	6.17196e+08	6.22103e+08	4.90424e+08

## Sheet: G6pcp TFs
Accession	Gene			Description	# Peptides	# PSMs	Liver NC	Pck1p fast	Pck1p refed	G6pcp fast	G6pcp refed	Pck1p-Fast	Pck1p-refed	G6pc-Fast	G6pc-Refed	G6pcp R/F
90093349	ADNP	Homeobox|Zinc finger, C2H2-type|Homeodomain-like|Zinc finger, C2H2-like	Adnp	activity-dependent neuroprotector homeobox protein [Mus musculus]	1	1	0	0	3.0104e+06	0	0	0	3.0104e+06	0	0	#DIV/0!	Consider not bind to G6pcp
62177117	BAZ2B	Bromodomain, conserved site|Bromodomain|Methyl-CpG DNA binding|Zinc finger, PHD-type|DDT domain|Zinc finger, FYVE/PHD-type|DNA-binding, integrase-type|DDT domain, subgroup|DDT domain superfamily|Zinc finger, PHD-finger	Baz2b	bromodomain adjacent to zinc finger domain, 2B [Mus musculus]	1	1	0	0	319605	0	0	0	319605	0	0	#DIV/0!
46369479	CEBPE	Basic-leucine zipper (bZIP) transcription factor|Basic leucine zipper|CCAAT/enhancer-binding	Cebpe	CCAAT/enhancer-binding protein epsilon [Mus musculus]	1	2	0	0	3.61797e+06	0	0	0	3.61797e+06	0	0	#DIV/0!
47059495	CSDA	Cold-shock conserved site|Cold-shock protein, DNA-binding|Cold shock protein|Nucleic acid-binding, OB-fold|Nucleic acid-binding, OB-fold-like	Ybx3	Y-box-binding protein 3 long isoform [Mus musculus]	6	43	0	0	4.67259e+06	0	0	0	4.67259e+06	0	0	#DIV/0!
6679627	ELF1	Ets|Winged helix-turn-helix transcription repressor DNA-binding|Transcription factor Elf-1, N-terminal	Elf1	ETS-related transcription factor Elf-1 [Mus musculus]	1	1	0	0	0	0	0	0	0	0	0	#DIV/0!
6753774	ESRRG	Nuclear hormone receptor, ligand-binding, core|Zinc finger, nuclear hormone receptor-type|Nuclear hormone receptor, ligand-binding|Zinc finger, NHR/GATA-type|Retinoid X receptor|Steroid hormone receptor	Esrrg	estrogen-related receptor gamma isoform1 [Mus musculus]	3	3	0	0	2.09931e+06	0	0	0	2.09931e+06	0	0	#DIV/0!
34328255	FOXO1	Transcription factor, fork head, conserved site|Transcription factor, fork head|Winged helix-turn-helix transcription repressor DNA-binding	Foxo1	forkhead box protein O1 [Mus musculus]	2	2	0	0	811572	0	0	0	811572	0	0	#DIV/0!
16716509	FOXP1	Transcription factor, fork head, conserved site|Transcription factor, fork head|Winged helix-turn-helix transcription repressor DNA-binding|Zinc finger, C2H2-like	Foxp1	forkhead box protein P1 isoform 1 [Mus musculus]	1	1	0	0	0	0	0	0	0	0	0	#DIV/0!
46909571	GATA6	Zinc finger, GATA-type|GATA-type transcription activator, N-terminal|Zinc finger, NHR/GATA-type	Gata6	transcription factor GATA-6 [Mus musculus]	2	3	0	0	3.18164e+06	0	0	0	3.18164e+06	0	0	#DIV/0!
31982951	HLF	Basic-leucine zipper (bZIP) transcription factor|Basic leucine zipper	Hlf	hepatic leukemia factor [Mus musculus]	1	1	0	0	3.93774e+06	0	0	0	3.93774e+06	0	0	#DIV/0!
253683481	HMG20B	High mobility group, HMG1/HMG2, subgroup|High mobility group, HMG1/HMG2|High mobility group, superfamily	Hmg20b	SWI/SNF-related matrix-associated actin-dependent regulator of chromatin subfamily E member 1-related [Mus musculus]	1	1	0	0	0	0	0	0	0	0	0	#DIV/0!
31981130	KLF13	Zinc finger, C2H2-type|Zinc finger, C2H2-type/integrase, DNA-binding|Zinc finger, C2H2-like	Klf13	Krueppel-like factor 13 [Mus musculus]	1	1	0	0	0	0	0	0	0	0	0	#DIV/0!
114155153	MAZ	Zinc finger, C2H2-type|Zinc finger, C2H2-type/integrase, DNA-binding|Zinc finger, C2H2-like	Maz	myc-associated zinc finger protein [Mus musculus]	2	11	0	0	833201	0	0	0	833201	0	0	#DIV/0!
31543307	NAB1	Nab1, C-terminal|Nab, N-terminal|NAB co-repressor, conserved region 2	Nab1	NGFI-A-binding protein 1 [Mus musculus]	1	1	0	0	1.1169e+06	0	0	0	1.1169e+06	0	0	#DIV/0!
34365779	PBX1	Homeobox, conserved site|Homeobox|PBX|Homeodomain-like|Homeodomain-related	Pbx1	pre-B-cell leukemia transcription factor 1 isoform a [Mus musculus]	2	4	0	0	1.25743e+07	0	0	0	1.25743e+07	0	0	#DIV/0!
8567384	PBX2	Homeobox, conserved site|Homeobox|PBX|Homeodomain-like|Homeodomain-related	Pbx2	pre-B-cell leukemia transcription factor 2 [Mus musculus]	2	4	0	0	862130	0	0	0	862130	0	0	#DIV/0!
293336061	RARA	Nuclear hormone receptor, ligand-binding, core|Zinc finger, nuclear hormone receptor-type|Nuclear hormone receptor, ligand-binding|Steroid hormone receptor|Retinoic acid receptor	Rara	retinoic acid receptor alpha isoform 1 [Mus musculus]	1	1	0	0	0	0	0	0	0	0	0	#DIV/0!
71037397	RFX5	DNA-binding RFX|Winged helix-turn-helix transcription repressor DNA-binding	Rfx5	DNA-binding protein Rfx5 [Mus musculus]	1	1	0	0	0	0	0	0	0	0	0	#DIV/0!
327315356	RXRB	Nuclear hormone receptor, ligand-binding, core|Zinc finger, nuclear hormone receptor-type|Nuclear hormone receptor, ligand-binding|Zinc finger, NHR/GATA-type|Retinoid X receptor|Steroid hormone receptor	Rxrb	retinoic acid receptor RXR-beta isoform 1 [Mus musculus]	6	40	0	0	0	0	0	0	0	0	0	#DIV/0!
27753981	SREBF1	Helix-loop-helix DNA-binding domain|Helix-loop-helix DNA-binding	Srebf1	sterol regulatory element-binding protein 1 precursor [Mus musculus]	4	4	0	0	3.18066e+06	0	0	0	3.18066e+06	0	0	#DIV/0!
128485774	STAT6	SH2 motif|p53-like transcription factor, DNA-binding|EF-hand-like domain|STAT transcription factor, DNA-binding, subdomain|STAT transcription factor, protein interaction|STAT transcription factor, all-alpha|STAT transcription factor, DNA-binding|STAT transcription factor, coiled coil|STAT transcription factor, core	Stat6	signal transducer and transcription activator 6 [Mus musculus]	1	1	0	0	0	0	0	0	0	0	0	#DIV/0!
47059087	ZBTB7B	BTB/POZ-like|Zinc finger, C2H2-type|BTB/POZ fold|BTB/POZ|Zinc finger, C2H2-type/integrase, DNA-binding|Zinc finger, C2H2-like	Zbtb7b	zinc finger and BTB domain-containing protein 7B [Mus musculus]	1	1	0	0	0	0	0	0	0	0	0	#DIV/0!
40254353	ZFP319	Zinc finger, C2H2-type|Zinc finger, C2H2-type/integrase, DNA-binding|Zinc finger, C2H2-like	Zfp319	zinc finger protein 319 [Mus musculus]	2	13	0	0	382955	0	0	0	382955	0	0	#DIV/0!
30425348	ZFP446	Krueppel-associated box|Transcription regulator SCAN|Zinc finger, C2H2-type|Zinc finger, C2H2-type/integrase, DNA-binding|Zinc finger, C2H2-like	Zfp446	zinc finger protein 446 isoform 1 [Mus musculus]	1	1	0	0	0	0	0	0	0	0	0	#DIV/0!
90669983	ZFP91	Zinc finger, C2H2-type|Zinc finger, C2H2-like	Zfp91	E3 ubiquitin-protein ligase ZFP91 [Mus musculus]	1	1	0	0	401208	0	0	0	401208	0	0	#DIV/0!
27804319	ZKSCAN1	Krueppel-associated box|Transcription regulator SCAN|Zinc finger, C2H2-type|Zinc finger, C2H2-type/integrase, DNA-binding|Zinc finger, C2H2-like	Zkscan1	zinc finger protein with KRAB and SCAN domains 1 isoform 1 [Mus musculus]	2	2	0	0	0	0	0	0	0	0	0	#DIV/0!
171846245	NR2C1	Nuclear hormone receptor, ligand-binding, core|Zinc finger, nuclear hormone receptor-type|Nuclear hormone receptor, ligand-binding|Zinc finger, NHR/GATA-type|Vitamin D receptor|Steroid hormone receptor	Nr2c1	nuclear receptor subfamily 2 group C member 1 [Mus musculus]	2	5	0	671435	8.70207e+06	0	0	671435	8.70207e+06	0	0	#DIV/0!
22507329	E2F4	Transcription factor E2F/dimerisation partner (TDP)|Winged helix-turn-helix transcription repressor DNA-binding|E2F Family	E2f4	transcription factor E2F4 [Mus musculus]	2	3	0	413364	1.63542e+06	0	0	413364	1.63542e+06	0	0	#DIV/0!
31544063	ZFP260	Zinc finger, C2H2-type|Zinc finger, C2H2-type/integrase, DNA-binding|Zinc finger, C2H2-like	Zfp260	zinc finger protein 260 [Mus musculus]	1	2	0	1.81767e+06	1.73563e+06	0	0	1.81767e+06	1.73563e+06	0	0	#DIV/0!
145553997	ARID1B	ARID/BRIGHT DNA-binding domain|Protein of unknown function DUF3518	Arid1b	AT rich interactive domain 1B (Swi1 like) [Mus musculus]	7	17	0	7.93372e+06	5.62103e+06	0	0	7.93372e+06	5.62103e+06	0	0	#DIV/0!
110347410	CEBPD	Basic-leucine zipper (bZIP) transcription factor|Basic leucine zipper|CCAAT/enhancer-binding	Cebpd	CCAAT/enhancer-binding protein delta [Mus musculus]	1	2	0	1.64245e+07	1.02746e+07	0	0	1.64245e+07	1.02746e+07	0	0	#DIV/0!
8394435	TEF	Basic-leucine zipper (bZIP) transcription factor|Basic leucine zipper	Tef	thyrotroph embryonic factor isoform 1 [Mus musculus]	6	11	0	4.53713e+06	2.74369e+06	0	0	4.53713e+06	2.74369e+06	0	0	#DIV/0!
40254249	NFRKB	-	Nfrkb	nuclear factor related to kappa-B-binding protein [Mus musculus]	5	5	0	3.07077e+06	1.79176e+06	0	0	3.07077e+06	1.79176e+06	0	0	#DIV/0!
114205435	BAZ2A	AT hook, DNA-binding motif|Bromodomain, conserved site|Bromodomain|Methyl-CpG DNA binding|Zinc finger, PHD-type|DDT domain|Zinc finger, FYVE/PHD-type|DNA-binding, integrase-type|DDT domain, subgroup|DDT domain superfamily|Zinc finger, PHD-finger	Baz2a	bromodomain adjacent to zinc finger domain protein 2A [Mus musculus]	1	1	0	957423	0	0	0	957423	0	0	0	#DIV/0!
6753644	DLX1	Homeobox, conserved site|Helix-turn-helix motif, lambda-like repressor|Homeobox|Homeodomain-like|Homeodomain-related|Homeobox, region	Dlx1	homeobox protein DLX-1 [Mus musculus]	8	39	0	3.49633e+08	0	0	0	3.49633e+08	0	0	0	#DIV/0!
153945880	EP400	SNF2-related|SANT, DNA-binding|DNA/RNA helicase, C-terminal|HSA|Homeodomain-like|HAS subgroup|DEAD-like helicase, N-terminal|Helicase/SANT-associated, DNA binding|Helicase, superfamily 1/2, ATP-binding domain|MYB-like	Ep400	E1A-binding protein p400 isoform 1 [Mus musculus]	1	2	0	1.20331e+06	0	0	0	1.20331e+06	0	0	0	#DIV/0!
6680582	KLF3	Zinc finger, C2H2-type|Zinc finger, C2H2-type/integrase, DNA-binding|Zinc finger, C2H2-like	Klf3	Krueppel-like factor 3 [Mus musculus]	1	1	0	2.3945e+06	0	0	0	2.3945e+06	0	0	0	#DIV/0!
113199769	NFATC3	Cell surface receptor IPT/TIG|p53-like transcription factor, DNA-binding|Rel homology|Immunoglobulin-like fold|Immunoglobulin E-set|Nuclear factor of activated T cells (NFAT), subgroup|Nuclear factor of activated T cells (NFAT)	Nfatc3	nuclear factor of activated T-cells, cytoplasmic 3 [Mus musculus]	2	3	0	2.51687e+06	0	0	0	2.51687e+06	0	0	0	#DIV/0!
6678507	NR1H2	Nuclear hormone receptor, ligand-binding, core|Zinc finger, nuclear hormone receptor-type|Nuclear hormone receptor, ligand-binding|Zinc finger, NHR/GATA-type|Vitamin D receptor|Steroid hormone receptor	Nr1h2	oxysterols receptor LXR-beta [Mus musculus]	1	1	0	902883	0	0	0	902883	0	0	0	#DIV/0!
65301157	SP3	Zinc finger, C2H2-type|Zinc finger, C2H2-type/integrase, DNA-binding|Zinc finger, C2H2-like	Sp3	transcription factor Sp3 isoform 1 [Mus musculus]	1	2	0	790229	0	0	0	790229	0	0	0	#DIV/0!
162135948	ZFP160	Krueppel-associated box|Zinc finger, C2H2-type|Zinc finger, C2H2-type/integrase, DNA-binding|Zinc finger, C2H2-like	Zfp160	zinc finger protein 160 [Mus musculus]	2	14	0	641461	0	0	0	641461	0	0	0	#DIV/0!
29244118	ZFP637	Zinc finger, C2H2-type|Zinc finger, C2H2-type/integrase, DNA-binding|Zinc finger, C2H2-like	Zfp637	zinc finger protein 32 [Mus musculus]	1	1	765806	0	0	0	0	0	0	0	0	#DIV/0!
161086992	ZFP709	Krueppel-associated box|Zinc finger, C2H2-type|Zinc finger, C2H2-type/integrase, DNA-binding|Zinc finger, C2H2-like	Zfp709	zinc finger protein 709 [Mus musculus]	2	13	0	3.1623e+06	0	0	0	3.1623e+06	0	0	0	#DIV/0!
74136557	ARID5B	ARID/BRIGHT DNA-binding domain	Arid5b	AT-rich interactive domain-containing protein 5B [Mus musculus]	3	4	0	0	1.45509e+06	0	2.29559e+06	0	1.45509e+06	0	2.29559e+06	#DIV/0!
6755680	BHLHE40	Helix-loop-helix DNA-binding domain|Orange|Helix-loop-helix DNA-binding|Orange subgroup	Bhlhe40	class E basic helix-loop-helix protein 40 [Mus musculus]	1	2	0	0	3.31823e+06	0	5.93311e+06	0	3.31823e+06	0	5.93311e+06	#DIV/0!
110835729	CUX1	Homeobox, conserved site|Homeobox|Homeodomain protein CUT|Homeodomain-like|Homeodomain-related|CASP, C-terminal	Cux1	protein CASP isoform a [Mus musculus]	3	3	0	0	1.14918e+06	0	2.43551e+06	0	1.14918e+06	0	2.43551e+06	#DIV/0!
6677659	DNAJC2	Heat shock protein DnaJ, conserved site|SANT, DNA-binding|Heat shock protein DnaJ, N-terminal|Homeodomain-like|Myb, DNA-binding|SANT, eukarya|Molecular chaperone, heat shock protein, Hsp40, DnaJ	Dnajc2	dnaJ homolog subfamily C member 2 [Mus musculus]	1	1	0	0	0	0	517362	0	0	0	517362	#DIV/0!
27754097	DR1	Transcription factor CBF/NF-Y/archaeal histone|Histone-fold|Transcription factor, CBFA/NFYB, DNA topoisomerase	Dr1	protein Dr1 [Mus musculus]	2	2	0	0	0	0	7.62438e+06	0	0	0	7.62438e+06	#DIV/0!
12963705	ELF2	Ets|Winged helix-turn-helix transcription repressor DNA-binding|Transcription factor Elf-1, N-terminal	Elf2	ETS-related transcription factor Elf-2 [Mus musculus]	3	6	0	0	739846	0	4.60058e+06	0	739846	0	4.60058e+06	#DIV/0!
66793398	FOXA1	Transcription factor, fork head, conserved site|Transcription factor, fork head|Winged helix-turn-helix transcription repressor DNA-binding|Fork-head N-terminal|Forkhead box protein, C-terminal	Foxa1	hepatocyte nuclear factor 3-alpha [Mus musculus]	3	6	0	0	1.72777e+06	0	1.23506e+07	0	1.72777e+06	0	1.23506e+07	#DIV/0!
153945804	FOXA2	Transcription factor, fork head, conserved site|Transcription factor, fork head|Winged helix-turn-helix transcription repressor DNA-binding|Fork-head N-terminal|Forkhead box protein, C-terminal	Foxa2	hepatocyte nuclear factor 3-beta [Mus musculus]	2	3	0	0	792187	0	2.28825e+06	0	792187	0	2.28825e+06	#DIV/0!
6754210	HMGA2	HMG-I/HMG-Y, DNA-binding, conserved site|AT hook, DNA-binding motif|High mobility group, HMG-I/HMG-Y|A.T hook-like	Hmga2	high mobility group protein HMGI-C [Mus musculus]	1	2	0	0	0	0	3.70638e+06	0	0	0	3.70638e+06	#DIV/0!
6680229	HMGB2	HMG box A DNA-binding domain, conserved site|High mobility group, HMG1/HMG2, subgroup|High mobility group, HMG1/HMG2|High mobility group, superfamily	Hmgb2	high mobility group protein B2 [Mus musculus]	1	1	0	0	0	0	5.06142e+06	0	0	0	5.06142e+06	#DIV/0!
120300925	HOXB3	Homeobox protein, antennapedia type, conserved site|Homeobox, conserved site|Homeobox|Homeodomain-like|Homeodomain-related|Homeobox, region	Hoxb3	homeobox protein Hox-B3 [Mus musculus]	2	3	0	0	0	0	575988	0	0	0	575988	#DIV/0!
6754610	MAFG	Maf transcription factor|Basic-leucine zipper (bZIP) transcription factor|Eukaryotic transcription factor, Skn-1-like, DNA-binding	Mafg	transcription factor MafG [Mus musculus]	1	2	0	0	1.74276e+06	0	6.90354e+06	0	1.74276e+06	0	6.90354e+06	#DIV/0!
34328263	MLXIPL	Helix-loop-helix DNA-binding domain|Helix-loop-helix DNA-binding	Mlxipl	carbohydrate-responsive element-binding protein [Mus musculus]	2	3	0	0	6.27355e+06	0	4.5508e+06	0	6.27355e+06	0	4.5508e+06	#DIV/0!
6754850	NFYB	Transcription factor, NFYB/HAP3, conserved site|Transcription factor CBF/NF-Y/archaeal histone|Histone-fold|Transcription factor, CBFA/NFYB, DNA topoisomerase	Nfyb	nuclear transcription factor Y subunit beta [Mus musculus]	1	1	0	0	0	0	59566682	0	0	0	59566682	#DIV/0!
112807199	NR2F6	Nuclear hormone receptor, ligand-binding, core|Zinc finger, nuclear hormone receptor-type|Nuclear hormone receptor, ligand-binding|Zinc finger, NHR/GATA-type|Zinc finger, C4-type, C-terminal domain|Steroid hormone receptor|Transcription factor COUP	Nr2f6	nuclear receptor subfamily 2 group F member 6 [Mus musculus]	3	9	0	0	7.70091e+06	0	1.81322e+06	0	7.70091e+06	0	1.81322e+06	#DIV/0!
6677829	RXRG	Nuclear hormone receptor, ligand-binding, core|Zinc finger, nuclear hormone receptor-type|Nuclear hormone receptor, ligand-binding|Retinoid X receptor|Steroid hormone receptor|Protein of unknown function DUF3345	Rxrg	retinoic acid receptor RXR-gamma isoform 1 [Mus musculus]	6	31	0	0	4.60641e+06	0	5.67615e+06	0	4.60641e+06	0	5.67615e+06	#DIV/0!
262205246	TEAD1	TEA/ATTS|Transcriptional enhancer factor	Tead1	transcriptional enhancer factor TEF-1 isoform 1 [Mus musculus]	7	22	0	0	5.8683e+06	0	862719	0	5.8683e+06	0	862719	#DIV/0!
226958409	TEF	Basic-leucine zipper (bZIP) transcription factor|Basic leucine zipper	Tef	thyrotroph embryonic factor isoform 2 [Mus musculus]	5	8	0	0	0	0	2.07485e+06	0	0	0	2.07485e+06	#DIV/0!
85701534	ZBTB45	BTB/POZ-like|Zinc finger, C2H2-type|BTB/POZ fold|BTB/POZ|Zinc finger, C2H2-type/integrase, DNA-binding|Zinc finger, C2H2-like	Zbtb45	zinc finger and BTB domain-containing protein 45 [Mus musculus]	3	26	0	0	0	0	1.20034e+07	0	0	0	1.20034e+07	#DIV/0!
169234810	ZFP292	Zinc finger, C2H2-type|Zinc finger, C2H2-like	Zfp292	zinc finger protein 292 [Mus musculus]	2	4	0	0	3.79764e+06	0	1.64309e+06	0	3.79764e+06	0	1.64309e+06	#DIV/0!
254553274	ZFP746	Krueppel-associated box|Zinc finger, C2H2-type|Zinc finger, C2H2-type/integrase, DNA-binding|Zinc finger, C2H2-like|Protein of unknown function DUF3669, zinc finger protein	Zfp746	zinc finger protein 746 [Mus musculus]	1	1	0	0	0	0	942952	0	0	0	942952	#DIV/0!
67906168	NR2C2	Nuclear hormone receptor, ligand-binding, core|Zinc finger, nuclear hormone receptor-type|Nuclear hormone receptor, ligand-binding|Zinc finger, NHR/GATA-type|Vitamin D receptor|Steroid hormone receptor	Nr2c2	nuclear receptor subfamily 2 group C member 2 [Mus musculus]	15	21	0	1.01056e+06	1.7311e+07	0	863435	1.01056e+06	1.7311e+07	0	863435	#DIV/0!
110225364	ZFHX3	Homeobox, conserved site|Homeobox|Zinc finger, U1-type|Zinc finger, C2H2-type|Homeodomain-like|Homeodomain-related|Zinc finger, C2H2-type/integrase, DNA-binding|Zinc finger, C2H2-like	Zfhx3	zinc finger homeobox protein 3 [Mus musculus]	22	39	0	2.25464e+06	2.21686e+07	0	1.03235e+07	2.25464e+06	2.21686e+07	0	1.03235e+07	#DIV/0!
13626034	TFAP4	Helix-loop-helix DNA-binding domain|Helix-loop-helix DNA-binding	Tfap4	transcription factor AP-4 [Mus musculus]	5	9	0	5.4114e+06	4.84559e+07	0	3.41971e+06	5.4114e+06	4.84559e+07	0	3.41971e+06	#DIV/0!
170650717	DBP	Basic-leucine zipper (bZIP) transcription factor|Basic leucine zipper	Dbp	D site-binding protein [Mus musculus]	5	16	0	3.58323e+06	3.20202e+07	0	1.50326e+06	3.58323e+06	3.20202e+07	0	1.50326e+06	#DIV/0!
172073171	TBP	Transcription factor TFIID, C-terminal/DNA glycosylase, N-terminal|Beta2-adaptin/TATA-box binding, C-terminal|TATA-box binding	Tbp	TATA-box-binding protein [Mus musculus]	4	15	0	1.0453e+07	4.40786e+07	0	4.24836e+07	1.0453e+07	4.40786e+07	0	4.24836e+07	#DIV/0!
21313424	DRAP1	Transcription factor CBF/NF-Y/archaeal histone|Histone-fold	Drap1	dr1-associated corepressor [Mus musculus]	2	6	0	5.07527e+06	1.98455e+07	0	1.64292e+07	5.07527e+06	1.98455e+07	0	1.64292e+07	#DIV/0!
157384990	TFE3	Helix-loop-helix DNA-binding domain|Helix-loop-helix DNA-binding|Protein of unknown function DUF3371	Tfe3	transcription factor E3 isoform a [Mus musculus]	9	38	0	1.41011e+07	5.50459e+07	0	6.87251e+06	1.41011e+07	5.50459e+07	0	6.87251e+06	#DIV/0!
239835744	TFEB	Helix-loop-helix DNA-binding domain|Helix-loop-helix DNA-binding|Protein of unknown function DUF3371	Tfeb	transcription factor EB isoform a [Mus musculus]	11	64	0	1.30705e+07	3.76147e+07	0	8.49214e+06	1.30705e+07	3.76147e+07	0	8.49214e+06	#DIV/0!
294979205	WIZ	Zinc finger, C2H2-type|Zinc finger, C2H2-like	Wiz	protein Wiz isoform 1 [Mus musculus]	3	5	0	1.04511e+06	2.94568e+06	0	2.1792e+06	1.04511e+06	2.94568e+06	0	2.1792e+06	#DIV/0!
110625908	NR1D1	Nuclear hormone receptor, ligand-binding, core|Zinc finger, nuclear hormone receptor-type|Nuclear hormone receptor, ligand-binding|Zinc finger, NHR/GATA-type|Vitamin D receptor|Steroid hormone receptor	Nr1d1	nuclear receptor subfamily 1 group D member 1 [Mus musculus]	1	3	0	875646	1.51648e+06	0	1.91429e+06	875646	1.51648e+06	0	1.91429e+06	#DIV/0!
61966683	CEBPG	Basic-leucine zipper (bZIP) transcription factor|Basic leucine zipper	Cebpg	CCAAT/enhancer-binding protein gamma [Mus musculus]	3	8	0	1.21295e+07	1.87067e+07	0	2.41923e+07	1.21295e+07	1.87067e+07	0	2.41923e+07	#DIV/0!
196049391	TEAD3	TEA/ATTS|Transcriptional enhancer factor	Tead3	transcriptional enhancer factor TEF-5 isoform 1 [Mus musculus]	5	11	0	1.57409e+06	1.72264e+06	0	746883	1.57409e+06	1.72264e+06	0	746883	#DIV/0!
124487369	ZFP362	Zinc finger, C2H2-type|Zinc finger, C2H2-type/integrase, DNA-binding|Zinc finger, C2H2-like	Zfp362	zinc finger protein 362 [Mus musculus]	3	21	0	1.87057e+06	1.97012e+06	0	1.97901e+06	1.87057e+06	1.97012e+06	0	1.97901e+06	#DIV/0!
164519134	GATAD2A	Zinc finger, GATA-type	Gatad2a	transcriptional repressor p66 alpha isoform b [Mus musculus]	10	22	0	9.64061e+06	1.73478e+06	0	3.77208e+06	9.64061e+06	1.73478e+06	0	3.77208e+06	#DIV/0!
71037383	ZBTB43	BTB/POZ-like|Zinc finger, C2H2-type|BTB/POZ fold|BTB/POZ|Zinc finger, C2H2-type/integrase, DNA-binding|Zinc finger, C2H2-like	Zbtb43	zinc finger and BTB domain-containing protein 43 isoform a [Mus musculus]	2	3	0	3.22239e+06	0	0	3.69133e+06	3.22239e+06	0	0	3.69133e+06	#DIV/0!
169646141	ZBTB44	BTB/POZ-like|Zinc finger, C2H2-type|BTB/POZ fold|BTB/POZ|Zinc finger, C2H2-type/integrase, DNA-binding|Zinc finger, C2H2-like	Zbtb44	zinc finger and BTB domain-containing protein 44 isoform a [Mus musculus]	3	7	586375	1.01153e+06	3.24353e+06	577947	2.90528e+06	425156	2.65716e+06	0	2.3189e+06	#DIV/0!
224809352	ZKSCAN3	Krueppel-associated box|Transcription regulator SCAN|Zinc finger, C2H2-type|Zinc finger, C2H2-type/integrase, DNA-binding|Zinc finger, C2H2-like	Zkscan3	zinc finger protein with KRAB and SCAN domains 3 [Mus musculus]	2	5	0	9.86587e+07	1.15005e+08	1.31013e+06	2.44212e+08	9.86587e+07	1.15005e+08	1.31013e+06	2.44212e+08	186.404
8393832	NFIL3	Basic-leucine zipper (bZIP) transcription factor|Vertebrate interleukin-3 regulated transcription factor|Basic leucine zipper|Transcription factor, basic leucine zipper, E4BP4	Nfil3	nuclear factor interleukin-3-regulated protein [Mus musculus]	7	13	0	1.38154e+07	9.38059e+06	1.75948e+06	3.36086e+07	1.38154e+07	9.38059e+06	1.75948e+06	3.36086e+07	19.1014
109627663	ZHX1	Homeobox|Zinc finger, C2H2-type|Homeodomain-like|Homeodomain-related|Zinc finger, C2H2-like	Zhx1	zinc fingers and homeoboxes protein 1 [Mus musculus]	8	17	0	0	3.83266e+06	2.07257e+06	2.77114e+07	0	3.83266e+06	2.07257e+06	2.77114e+07	13.3705
295424118	RREB1	Zinc finger, C2H2-type|Zinc finger, C2H2-type/integrase, DNA-binding|Zinc finger, C2H2-like	Rreb1	ras-responsive element-binding protein 1 isoform 2 [Mus musculus]	20	61	0	7.06422e+06	1.80501e+07	2.33343e+06	2.76681e+07	7.06422e+06	1.80501e+07	2.33343e+06	2.76681e+07	11.8573
40254321	ZHX3	Homeobox|Homeodomain-like|Homeodomain-related|Zinc finger, C2H2-like	Zhx3	zinc fingers and homeoboxes protein 3 [Mus musculus]	14	39	0	4.15413e+06	6.83507e+06	2.59611e+06	2.44273e+07	4.15413e+06	6.83507e+06	2.59611e+06	2.44273e+07	9.40919
257196201	ZBTB20	BTB/POZ-like|Zinc finger, C2H2-type|BTB/POZ fold|BTB/POZ|Zinc finger, C2H2-type/integrase, DNA-binding|Zinc finger, C2H2-like	Zbtb20	zinc finger and BTB domain-containing protein 20 isoform L [Mus musculus]	18	231	4.79126e+06	6.09812e+07	1.20345e+08	6.61399e+07	5.41692e+08	5.61899e+07	1.15554e+08	6.13487e+07	5.36901e+08	8.75163
111185900	HNF1B	Homeobox|Hepatocyte nuclear factor 1, beta isoform, C-terminal|Hepatocyte nuclear factor 1, N-terminal|Homeodomain-like|Lambda repressor-like, DNA-binding|Homeodomain-related	Hnf1b	hepatocyte nuclear factor 1-beta [Mus musculus]	5	18	0	1.33744e+06	7.81786e+06	1.73382e+06	1.24714e+07	1.33744e+06	7.81786e+06	1.73382e+06	1.24714e+07	7.19304
40789094	ZHX2	Homeobox|Zinc finger, C2H2-type|Homeodomain-like|Homeodomain-related|Zinc finger, C2H2-like	Zhx2	zinc fingers and homeoboxes protein 2 [Mus musculus]	18	55	0	5.89522e+06	1.20977e+07	6.03324e+06	4.11587e+07	5.89522e+06	1.20977e+07	6.03324e+06	4.11587e+07	6.82199
255759921	NFATC1	Cell surface receptor IPT/TIG|p53-like transcription factor, DNA-binding|Rel homology|Immunoglobulin-like fold|Immunoglobulin E-set|Nuclear factor of activated T cells (NFAT), subgroup|Nuclear factor of activated T cells (NFAT)|Nuclear factor of activated T-cells 1	Nfatc1	nuclear factor of activated T-cells, cytoplasmic 1 isoform 4 [Mus musculus]	3	10	0	4.12958e+06	2.24184e+06	798060	5.16734e+06	4.12958e+06	2.24184e+06	798060	5.16734e+06	6.47488
31542626	HMBOX1	Homeobox|Hepatocyte nuclear factor 1, N-terminal|Homeodomain-like|Lambda repressor-like, DNA-binding|Homeodomain-related	Hmbox1	homeobox-containing protein 1 [Mus musculus]	10	39	0	5.2854e+06	4.62526e+07	3.29409e+06	2.05286e+07	5.2854e+06	4.62526e+07	3.29409e+06	2.05286e+07	6.23194
254911067	NR1H4	Nuclear hormone receptor, ligand-binding, core|Zinc finger, nuclear hormone receptor-type|Nuclear hormone receptor, ligand-binding|Zinc finger, NHR/GATA-type|Vitamin D receptor|Steroid hormone receptor	Nr1h4	bile acid receptor isoform 1 [Mus musculus]	12	55	0	4.14756e+06	2.54971e+07	3.6687e+06	2.23296e+07	4.14756e+06	2.54971e+07	3.6687e+06	2.23296e+07	6.08653
13775156	XBP1	Basic-leucine zipper (bZIP) transcription factor|Basic leucine zipper	Xbp1	X-box-binding protein 1 isoform XBP1(U) [Mus musculus]	5	18	0	1.95967e+06	7.9942e+06	1.26239e+06	7.01849e+06	1.95967e+06	7.9942e+06	1.26239e+06	7.01849e+06	5.55971
112293262	ESRRA	Nuclear hormone receptor, ligand-binding, core|Zinc finger, nuclear hormone receptor-type|Nuclear hormone receptor, ligand-binding|Zinc finger, NHR/GATA-type|Retinoid X receptor|Steroid hormone receptor	Esrra	steroid hormone receptor ERR1 [Mus musculus]	9	30	0	1.05391e+07	3.16015e+07	3.2156e+06	1.73175e+07	1.05391e+07	3.16015e+07	3.2156e+06	1.73175e+07	5.38546
38348308	RYBP	Zinc finger, RanBP2-type	Rybp	RING1 and YY1-binding protein [Mus musculus]	2	5	0	0	4.05975e+06	1.18406e+06	6.31785e+06	0	4.05975e+06	1.18406e+06	6.31785e+06	5.33576
82546826	FOXK1	Transcription factor, fork head, conserved site|Forkhead-associated|Transcription factor, fork head|SMAD/FHA domain	Foxk1	forkhead box protein K1 [Mus musculus]	3	8	0	1.62849e+06	5.05582e+06	1.15138e+06	5.7338e+06	1.62849e+06	5.05582e+06	1.15138e+06	5.7338e+06	4.97995
262331578	HMGA1	HMG-I/HMG-Y, DNA-binding, conserved site|AT hook, DNA-binding motif|High mobility group, HMG-I/HMG-Y|A.T hook-like	Hmga1	high mobility group protein HMG-I/HMG-Y isoform a [Mus musculus]	5	23	0	1.07946e+07	1.29053e+07	1.46511e+07	7.18985e+07	1.07946e+07	1.29053e+07	1.46511e+07	7.18985e+07	4.90739
166295202	HNF1A	Homeobox|Hepatocyte nuclear factor 1, beta isoform, C-terminal|Hepatocyte nuclear factor 1, alpha isoform C-terminal|Hepatocyte nuclear factor 1, N-terminal|Homeodomain-like|Lambda repressor-like, DNA-binding|Homeodomain-related	Hnf1a	hepatocyte nuclear factor 1-alpha [Mus musculus]	12	108	0	2.94103e+07	8.40753e+07	3.76535e+07	1.75908e+08	2.94103e+07	8.40753e+07	3.76535e+07	1.75908e+08	4.67176
38327623	TBX3	Transcription factor, T-box, conserved site|p53-like transcription factor, DNA-binding|Transcription factor, T-box	Tbx3	T-box transcription factor TBX3 isoform 2 [Mus musculus]	12	34	0	6.20361e+06	2.64334e+07	2.28448e+06	1.01528e+07	6.20361e+06	2.64334e+07	2.28448e+06	1.01528e+07	4.44426
86198301	CEBPA	Basic-leucine zipper (bZIP) transcription factor|Basic leucine zipper|CCAAT/enhancer-binding	Cebpa	CCAAT/enhancer-binding protein alpha [Mus musculus]	8	93	3.34231e+06	3.32467e+08	8.16271e+08	9.7005e+07	3.78716e+08	3.29124e+08	8.12929e+08	9.36627e+07	3.75374e+08	4.00772
6754538	LHX2	Homeobox, conserved site|Homeobox|Zinc finger, LIM-type|Homeodomain-like|Homeodomain-related	Lhx2	LIM/homeobox protein Lhx2 [Mus musculus]	5	11	0	3.87623e+06	6.88643e+06	2.94082e+06	1.10469e+07	3.87623e+06	6.88643e+06	2.94082e+06	1.10469e+07	3.75641
6679042	NFIC	CTF transcription factor/nuclear factor 1, conserved site|MAD homology 1, Dwarfin-type|CTF transcription factor/nuclear factor 1, DNA-binding domain|CTF transcription factor/nuclear factor 1|CTF transcription factor/nuclear factor 1, N-terminal	Nfic	nuclear factor 1 C-type isoform a [Mus musculus]	17	130	1.03021e+06	6.84566e+07	1.9576e+08	5.83308e+07	2.0358e+08	6.74264e+07	1.9473e+08	5.73006e+07	2.0255e+08	3.53487
158508460	AHCTF1	AT hook, DNA-binding motif	Ahctf1	protein ELYS [Mus musculus]	66	452	5.4166e+06	6.21851e+07	1.28859e+08	6.92693e+07	2.28621e+08	5.67685e+07	1.23443e+08	6.38527e+07	2.23204e+08	3.49561
126352391	ZFP384	Zinc finger, C2H2-type|Zinc finger, C2H2-type/integrase, DNA-binding|Zinc finger, C2H2-like	Zfp384	zinc finger protein 384 isoform 1 [Mus musculus]	8	43	1521299	6.18971e+06	9.28887e+06	5.09819e+06	1.3887e+07	4.66841e+06	7.76757e+06	3.57689e+06	1.23657e+07	3.45711
119220568	ONECUT2	Homeobox|Homeodomain protein CUT|Homeodomain-like|Homeodomain-related	Onecut2	one cut domain family member 2 [Mus musculus]	13	110	0	1.51923e+07	4.15367e+07	6.30909e+07	2.17675e+08	1.51923e+07	4.15367e+07	6.30909e+07	2.17675e+08	3.45018
21314854	GATAD2B	Zinc finger, GATA-type	Gatad2b	transcriptional repressor p66-beta [Mus musculus]	5	15	0	7.8203e+06	3.86711e+06	2.38553e+06	8.21045e+06	7.8203e+06	3.86711e+06	2.38553e+06	8.21045e+06	3.44177
46575916	HNF4A	Nuclear hormone receptor, ligand-binding, core|Zinc finger, nuclear hormone receptor-type|Nuclear hormone receptor, ligand-binding|Retinoid X receptor|Steroid hormone receptor	Hnf4a	hepatocyte nuclear factor 4-alpha [Mus musculus]	8	80	4.12299e+06	1.00596e+08	2.12888e+08	6.2736e+07	2.03398e+08	9.64729e+07	2.08765e+08	5.8613e+07	1.99275e+08	3.39984
91598896	MTA1	Zinc finger, GATA-type|ELM2|SANT, DNA-binding|Bromo adjacent homology (BAH) domain|Homeodomain-like|SANT, eukarya	Mta1	metastasis-associated protein MTA1 [Mus musculus]	5	12	0	409911	522345	792164	2.66626e+06	409911	522345	792164	2.66626e+06	3.36579
218931186	TCF7L2	High mobility group, HMG1/HMG2|High mobility group, superfamily|CTNNB1 binding, N-teminal	Tcf7l2	transcription factor 7-like 2 isoform 4 [Mus musculus]	7	18	0	0	1.5301e+07	1.02721e+07	3.40473e+07	0	1.5301e+07	1.02721e+07	3.40473e+07	3.31455
114326538	NFYC	Transcription factor CBF/NF-Y/archaeal histone|Histone-fold	Nfyc	nuclear transcription factor Y subunit gamma isoform 1 [Mus musculus]	4	9	0	0	4.7865e+06	1.2522e+07	4.01156e+07	0	4.7865e+06	1.2522e+07	4.01156e+07	3.20362
45598394	NR2F2	Nuclear hormone receptor, ligand-binding, core|Zinc finger, nuclear hormone receptor-type|Nuclear hormone receptor, ligand-binding|Zinc finger, NHR/GATA-type|Zinc finger, C4-type, C-terminal domain|Steroid hormone receptor|Transcription factor COUP	Nr2f2	COUP transcription factor 2 isoform 1 [Mus musculus]	5	18	0	6.85663e+06	1.98283e+07	4.39949e+06	1.35209e+07	6.85663e+06	1.98283e+07	4.39949e+06	1.35209e+07	3.07328
46909569	GATA4	Zinc finger, GATA-type|GATA-type transcription activator, N-terminal|Zinc finger, NHR/GATA-type|Transcription factor GATA-4/5/6	Gata4	transcription factor GATA-4 [Mus musculus]	5	49	0	2.46205e+07	6.71917e+07	1.03062e+07	3.08509e+07	2.46205e+07	6.71917e+07	1.03062e+07	3.08509e+07	2.99342
117414176	VEZF1	Zinc finger, C2H2-type|Zinc finger, C2H2-type/integrase, DNA-binding|Zinc finger, C2H2-like	Vezf1	vascular endothelial zinc finger 1 [Mus musculus]	3	21	0	5.43443e+06	1.29267e+07	3.65138e+06	1.04924e+07	5.43443e+06	1.29267e+07	3.65138e+06	1.04924e+07	2.87354
161016831	NFYA	CCAAT-binding factor, conserved site|CCAAT-binding transcription factor, subunit B	Nfya	nuclear transcription factor Y subunit alpha isoform a [Mus musculus]	2	9	0	0	1.42752e+06	6.56119e+06	1.87511e+07	0	1.42752e+06	6.56119e+06	1.87511e+07	2.85788
7106459	CLOCK	PAS|Helix-loop-helix DNA-binding domain|Helix-loop-helix DNA-binding|PAS fold-3|PAS fold|Nuclear translocator|PAC motif	Clock	circadian locomoter output cycles protein kaput [Mus musculus]	12	37	0	6.04947e+06	2.25784e+07	2.68036e+06	7.64658e+06	6.04947e+06	2.25784e+07	2.68036e+06	7.64658e+06	2.85282
6680241	ONECUT1	Homeobox|Homeodomain protein CUT|Homeodomain-like|Homeodomain-related	Onecut1	hepatocyte nuclear factor 6 [Mus musculus]	15	180	0	603769	1.77754e+08	1.68578e+08	4.68584e+08	603769	1.77754e+08	1.68578e+08	4.68584e+08	2.77963
15022805	HMG20A	High mobility group, HMG1/HMG2|High mobility group, superfamily	Hmg20a	high mobility group protein 20A [Mus musculus]	2	5	0	6.53922e+06	1.59212e+07	2.69876e+06	7.14714e+06	6.53922e+06	1.59212e+07	2.69876e+06	7.14714e+06	2.64831
34328119	GABPA	Ets|Sterile alpha motif/pointed|Sterile alpha motif homology|Winged helix-turn-helix transcription repressor DNA-binding|Sterile alpha motif-type|Transcription factor, GA-binding, alpha subunit	Gabpa	GA-binding protein alpha chain [Mus musculus]	6	10	0	0	0	2.77358e+06	7.20597e+06	0	0	2.77358e+06	7.20597e+06	2.59808
163965420	NFIB	CTF transcription factor/nuclear factor 1, conserved site|MAD homology 1, Dwarfin-type|CTF transcription factor/nuclear factor 1, DNA-binding domain|CTF transcription factor/nuclear factor 1|CTF transcription factor/nuclear factor 1, N-terminal	Nfib	nuclear factor 1 B-type isoform 1 [Mus musculus]	14	97	2.3579e+06	4.48118e+07	7.69767e+07	4.87827e+07	1.19657e+08	4.24539e+07	7.46188e+07	4.64248e+07	1.17299e+08	2.52665
194328715	ZFP207	Zinc finger, C2H2-type|Zinc finger, C2H2-like	Zfp207	zinc finger protein 207 isoform 1 [Mus musculus]	3	15	0	2.28532e+07	2.82796e+07	1.5079e+07	3.67384e+07	2.28532e+07	2.82796e+07	1.5079e+07	3.67384e+07	2.43639
166706895	TOX4	High mobility group, HMG1/HMG2, subgroup|High mobility group, HMG1/HMG2|High mobility group, superfamily	Tox4	TOX high mobility group box family member 4 [Mus musculus]	10	47	0	1.89515e+07	1.97731e+07	7.05485e+06	1.66555e+07	1.89515e+07	1.97731e+07	7.05485e+06	1.66555e+07	2.36085
171846256	NFIA	CTF transcription factor/nuclear factor 1, conserved site|MAD homology 1, Dwarfin-type|CTF transcription factor/nuclear factor 1, DNA-binding domain|CTF transcription factor/nuclear factor 1|CTF transcription factor/nuclear factor 1, N-terminal	Nfia	nuclear factor 1 A-type isoform 1 [Mus musculus]	14	146	0	5.91532e+07	1.03732e+08	4.25994e+07	9.51684e+07	5.91532e+07	1.03732e+08	4.25994e+07	9.51684e+07	2.23403
6756049	ZFP148	Zinc finger, C2H2-type|Zinc finger, C2H2-type/integrase, DNA-binding|Zinc finger, C2H2-like	Zfp148	zinc finger protein 148 [Mus musculus]	12	43	0	1.25474e+07	4.7538e+07	1.12826e+06	2.47987e+06	1.25474e+07	4.7538e+07	1.12826e+06	2.47987e+06	2.19795
153792362	ELK4	Ets|Winged helix-turn-helix transcription repressor DNA-binding	Elk4	ETS domain-containing protein Elk-4 [Mus musculus]	6	13	0	0	0	1.65591e+07	3.62767e+07	0	0	1.65591e+07	3.62767e+07	2.19074
6680732	ARNTL	PAS|Helix-loop-helix DNA-binding domain|Helix-loop-helix DNA-binding|PAS fold-3|PAS fold|Nuclear translocator|PAC motif	Arntl	aryl hydrocarbon receptor nuclear translocator-like protein 1 isoform 1 [Mus musculus]	10	24	0	4.89043e+06	2.04474e+07	3.96797e+06	8.34811e+06	4.89043e+06	2.04474e+07	3.96797e+06	8.34811e+06	2.10387
126517474	NFIX	CTF transcription factor/nuclear factor 1, conserved site|MAD homology 1, Dwarfin-type|CTF transcription factor/nuclear factor 1, DNA-binding domain|CTF transcription factor/nuclear factor 1|CTF transcription factor/nuclear factor 1, N-terminal	Nfix	nuclear factor 1 X-type isoform 3 [Mus musculus]	13	169	2.44072e+06	6.40996e+07	1.20834e+08	8.46579e+07	1.73621e+08	6.16589e+07	1.18393e+08	8.22172e+07	1.71181e+08	2.08206
166706891	TCF20	Zinc finger, PHD-type	Tcf20	transcription factor 20 isoform a [Mus musculus]	4	17	0	4.88536e+06	6.95576e+06	2461876	5.10111e+06	4.88536e+06	6.95576e+06	2461876	5.10111e+06	2.07204
298676444	TADA2B	Zinc finger, ZZ-type|SANT, DNA-binding|Homeodomain-like|Myb, DNA-binding|SANT, eukarya|Transcriptional adaptor 2	Tada2b	transcriptional adaptor 2B [Mus musculus]	1	3	0	0	2.67391e+06	3.00884e+06	6.08836e+06	0	2.67391e+06	3.00884e+06	6.08836e+06	2.02349
51491880	MTA2	Zinc finger, GATA-type|ELM2|SANT, DNA-binding|Bromo adjacent homology (BAH) domain|SANT, eukarya	Mta2	metastasis-associated protein MTA2 [Mus musculus]	17	57	1.4252e+06	1.75283e+07	1.40226e+07	8.46059e+06	1.51443e+07	1.61031e+07	1.25974e+07	7.03539e+06	1.37191e+07	1.95002
124249109	ARID1A	ARID/BRIGHT DNA-binding domain|Protein of unknown function DUF3518	Arid1a	AT-rich interactive domain-containing protein 1A [Mus musculus]	19	48	0	9.80402e+06	9.91774e+06	5.89989e+06	1.14258e+07	9.80402e+06	9.91774e+06	5.89989e+06	1.14258e+07	1.93661
119226255	SP1	Zinc finger, C2H2-type|Zinc finger, C2H2-type/integrase, DNA-binding|Zinc finger, C2H2-like	Sp1	transcription factor Sp1 [Mus musculus]	1	7	0	1.91225e+06	1.61061e+06	2.02291e+06	3.85722e+06	1.91225e+06	1.61061e+06	2.02291e+06	3.85722e+06	1.90677
255982546	NRF1	Nuclear respiratory factor-1, activation binding domain|Nuclear respiratory factor 1, NLS/DNA-binding, dimerisation domain	Nrf1	nuclear respiratory factor 1 isoform b [Mus musculus]	4	7	0	5.11668e+06	4.62119e+06	2.41313e+06	4.48414e+06	5.11668e+06	4.62119e+06	2.41313e+06	4.48414e+06	1.85822
159032064	SALL1	Zinc finger, C2H2-type|Zinc finger, C2H2-type/integrase, DNA-binding|Zinc finger, C2H2-like	Sall1	sal-like protein 1 [Mus musculus]	2	5	0	2.483e+06	3.27046e+06	1.89614e+06	3.46287e+06	2.483e+06	3.27046e+06	1.89614e+06	3.46287e+06	1.82628
14010847	NR5A2	Nuclear hormone receptor, ligand-binding, core|Zinc finger, nuclear hormone receptor-type|Nuclear hormone receptor, ligand-binding|Zinc finger, NHR/GATA-type|Vitamin D receptor|Steroid hormone receptor|Orphan nuclear receptor Fushi-tarazu factor 1	Nr5a2	nuclear receptor subfamily 5 group A member 2 isoform 1 [Mus musculus]	13	104	0	7.88562e+06	4.16026e+07	6.41536e+07	1.10242e+08	7.88562e+06	4.16026e+07	6.41536e+07	1.10242e+08	1.71841
94400775	RBPJ	Cell surface receptor IPT/TIG|p53-like transcription factor, DNA-binding|Immunoglobulin-like fold|Immunoglobulin E-set|Beta-trefoil|LAG1, DNA binding	Rbpj	recombining binding protein suppressor of hairless isoform 1 [Mus musculus]	9	34	0	1.58423e+07	1.88619e+07	7.14198e+06	1.21592e+07	1.58423e+07	1.88619e+07	7.14198e+06	1.21592e+07	1.7025
19526802	ERG	Ets|Sterile alpha motif/pointed|Sterile alpha motif homology|Winged helix-turn-helix transcription repressor DNA-binding|Sterile alpha motif-type	Erg	transcriptional regulator ERG [Mus musculus]	3	7	0	1.08144e+06	1.55929e+06	1.00766e+07	1.61721e+07	1.08144e+06	1.55929e+06	1.00766e+07	1.61721e+07	1.60492
19745144	CREB1	Coactivator CBP, pKID|Basic-leucine zipper (bZIP) transcription factor|bZIP transcription factor, bZIP-1|cAMP response element binding (CREB) protein	Creb1	cyclic AMP-responsive element-binding protein 1 isoform B [Mus musculus]	3	13	0	5.0264e+06	1.3021e+07	5.49964e+06	8.80945e+06	5.0264e+06	1.3021e+07	5.49964e+06	8.80945e+06	1.60182
66955886	PDS5B	AT hook, DNA-binding motif|Armadillo-type fold	Pds5b	sister chromatid cohesion protein PDS5 homolog B [Mus musculus]	45	223	0	4.58751e+07	5.38614e+07	4.10094e+07	6.43485e+07	4.58751e+07	5.38614e+07	4.10094e+07	6.43485e+07	1.56912
6679483	PROX1	Homeodomain-like|Homeobox prospero-like	Prox1	prospero homeobox protein 1 [Mus musculus]	11	43	0	4.42131e+06	1.00909e+07	7.67973e+06	1.16524e+07	4.42131e+06	1.00909e+07	7.67973e+06	1.16524e+07	1.51729
6755384	RXRA	Nuclear hormone receptor, ligand-binding, core|Zinc finger, nuclear hormone receptor-type|Nuclear hormone receptor, ligand-binding|Retinoid X receptor|Steroid hormone receptor|Protein of unknown function DUF3345	Rxra	retinoic acid receptor RXR-alpha [Mus musculus]	12	91	0	3.88831e+07	5.79364e+07	2.51426e+07	3.73508e+07	3.88831e+07	5.79364e+07	2.51426e+07	3.73508e+07	1.48556
134032032	UBP1	CP2 transcription factor|Sterile alpha motif homology	Ubp1	upstream-binding protein 1 isoform a [Mus musculus]	9	28	0	1.35794e+07	1.90082e+07	8.99051e+06	1.25022e+07	1.35794e+07	1.90082e+07	8.99051e+06	1.25022e+07	1.3906
6753404	CEBPB	Basic-leucine zipper (bZIP) transcription factor|Basic leucine zipper|CCAAT/enhancer-binding	Cebpb	CCAAT/enhancer-binding protein beta [Mus musculus]	7	92	0	3.67986e+08	2.36003e+08	1.04726e+08	1.44118e+08	3.67986e+08	2.36003e+08	1.04726e+08	1.44118e+08	1.37615
12963557	DMAP1	SANT, DNA-binding|DNA methyltransferase 1-associated 1	Dmap1	DNA methyltransferase 1-associated protein 1 [Mus musculus]	7	15	0	2.6072e+06	4.38097e+06	3.1557e+06	4.09555e+06	2.6072e+06	4.38097e+06	3.1557e+06	4.09555e+06	1.29783
226874810	MLX	Helix-loop-helix DNA-binding domain|Helix-loop-helix DNA-binding	Mlx	max-like protein X isoform gamma [Mus musculus]	4	10	0	3.63332e+06	5.87653e+06	2.21045e+06	2.83584e+06	3.63332e+06	5.87653e+06	2.21045e+06	2.83584e+06	1.28293
347658945	REPIN1	Zinc finger, C2H2-type|Zinc finger, C2H2-type/integrase, DNA-binding|Zinc finger, C2H2-like	Repin1	replication initiator 1 isoform c [Mus musculus]	3	10	0	4.32901e+06	3.33626e+06	3.46795e+06	4.42854e+06	4.32901e+06	3.33626e+06	3.46795e+06	4.42854e+06	1.27699
8393627	IRF3	Interferon regulatory factor, conserved site|Interferon regulatory factor|SMAD/FHA domain|Winged helix-turn-helix transcription repressor DNA-binding|SMAD domain-like|Interferon regulatory factor-3	Irf3	interferon regulatory factor 3 [Mus musculus]	7	32	0	1.98205e+07	2.66575e+07	1.54277e+07	1.96765e+07	1.98205e+07	2.66575e+07	1.54277e+07	1.96765e+07	1.27539
70887767	HIC2	BTB/POZ-like|Zinc finger, C2H2-type|BTB/POZ fold|BTB/POZ|Zinc finger, C2H2-type/integrase, DNA-binding|Zinc finger, C2H2-like	Hic2	hypermethylated in cancer 2 protein [Mus musculus]	1	4	0	7.02511e+06	7.11386e+06	5.51193e+06	7.01968e+06	7.02511e+06	7.11386e+06	5.51193e+06	7.01968e+06	1.27354
160948575	TERF2IP	Homeodomain-like|Homeodomain-related|Rap1 Myb	Terf2ip	telomeric repeat-binding factor 2-interacting protein 1 [Mus musculus]	8	19	0	4066680	3.57421e+06	2.86661e+06	3.52947e+06	4066680	3.57421e+06	2.86661e+06	3.52947e+06	1.23124
6680231	HMGB3	HMG box A DNA-binding domain, conserved site|High mobility group, HMG1/HMG2, subgroup|High mobility group, HMG1/HMG2|High mobility group, superfamily	Hmgb3	high mobility group protein B3 [Mus musculus]	2	5	0	0	1.09085e+07	1.16446e+07	1.41591e+07	0	1.09085e+07	1.16446e+07	1.41591e+07	1.21593
37674207	GZF1	BTB/POZ-like|Zinc finger, C2H2-type|BTB/POZ fold|BTB/POZ|Zinc finger, C2H2-type/integrase, DNA-binding|Zinc finger, C2H2-like	Gzf1	GDNF-inducible zinc finger protein 1 [Mus musculus]	5	13	1.0909e+06	1.7329e+06	2.54144e+06	2.08186e+06	2.27581e+06	641998	1.45054e+06	990955	1.1849e+06	1.19572
166235125	SMARCC2	Chromo domain|SANT, DNA-binding|BRCT|SWIRM|Homeodomain-like|Myb, DNA-binding|SANT, eukarya	Smarcc2	SWI/SNF complex subunit SMARCC2 isoform 1 [Mus musculus]	30	117	1.04264e+06	2.66912e+07	2.17085e+07	1.57579e+07	1.80376e+07	2.56485e+07	2.06658e+07	1.47153e+07	1.69949e+07	1.15492
10181166	SMARCE1	High mobility group, HMG1/HMG2|High mobility group, superfamily	Smarce1	SWI/SNF-related matrix-associated actin-dependent regulator of chromatin subfamily E member 1 [Mus musculus]	12	56	0	1.67687e+07	1.63117e+07	1.05994e+07	1.17783e+07	1.67687e+07	1.63117e+07	1.05994e+07	1.17783e+07	1.11122
161353485	ZFP187	Transcription regulator SCAN|Zinc finger, C2H2-type|Zinc finger, C2H2-type/integrase, DNA-binding|Zinc finger, C2H2-like	Zscan26	zinc finger and SCAN domain-containing protein 26 [Mus musculus]	1	5	3.37021e+06	2.56057e+06	4.23553e+06	5.15745e+06	5.12846e+06	0	865314	1.78724e+06	1.75825e+06	0.983781
133904142	TERF2	SANT, DNA-binding|Homeodomain-like|Homeodomain-related|Telomere repeat-binding factor, dimerisation domain|Myb, DNA-binding|HTH transcriptional regulator, Myb-type, DNA-binding|Telomeric repeat-binding factor 1, Pin2	Terf2	telomeric repeat-binding factor 2 isoform 1 [Mus musculus]	4	7	0	2.14001e+06	215180	542549	532817	2.14001e+06	215180	542549	532817	0.982064
164663880	PPARA	Nuclear hormone receptor, ligand-binding, core|Zinc finger, nuclear hormone receptor-type|Nuclear hormone receptor, ligand-binding|Zinc finger, NHR/GATA-type|Steroid hormone receptor|Peroxisome proliferator-activated receptor|Peroxisome proliferator-activated receptor, alpha	Ppara	peroxisome proliferator-activated receptor alpha [Mus musculus]	4	7	0	2.94656e+06	0	1.52608e+06	1.48334e+06	2.94656e+06	0	1.52608e+06	1.48334e+06	0.971994
113205067	ZFX	Transcriptional activator, Zfx / Zfy domain|Zinc finger, C2H2-type|Zinc finger, C2H2-type/integrase, DNA-binding|Zinc finger, C2H2-like	Zfx	zinc finger X-chromosomal protein [Mus musculus]	6	53	185105	9.83874e+06	1.49311e+07	1.2314e+07	1.16666e+07	9.65363e+06	1.4746e+07	1.21289e+07	1.14815e+07	0.946625
226437608	GCFC1	GC-rich sequence DNA-binding factor-like	Paxbp1	PAX3- and PAX7-binding protein 1 [Mus musculus]	15	53	873899	1.23813e+07	1.39888e+07	1.90346e+07	1.77565e+07	1.15074e+07	1.31149e+07	1.81607e+07	1.68826e+07	0.929623
113205059	YBX1	Cold-shock conserved site|Cold-shock protein, DNA-binding|Cold shock protein|Nucleic acid-binding, OB-fold|Nucleic acid-binding, OB-fold-like	Ybx1	nuclease-sensitive element-binding protein 1 [Mus musculus]	12	127	4.6435e+07	1.11131e+08	1.38823e+08	8.21505e+07	7.80912e+07	6.46956e+07	9.23876e+07	3.57155e+07	3.16562e+07	0.886343
41406074	HMGN1	High mobility group protein HMG14/HMG17	Hmgn1	non-histone chromosomal protein HMG-14 [Mus musculus]	3	13	244491	1.49861e+07	9.0499e+06	6.91845e+06	6.02385e+06	1.47416e+07	8.80541e+06	6.67396e+06	5.77936e+06	0.865956
257196177	ZNF512B	Zinc finger, C2H2-type|Zinc finger, C2H2-like	Znf512b	zinc finger protein 512B [Mus musculus]	4	15	0	4.1733e+06	3.93203e+06	9.23077e+06	7.8559e+06	4.1733e+06	3.93203e+06	9.23077e+06	7.8559e+06	0.851056
22779899	CDC5L	SANT, DNA-binding|Homeodomain-like|Homeodomain-related|Myb, DNA-binding|HTH transcriptional regulator, Myb-type, DNA-binding|Myb transcription factor|Protein of unknown function DUF3351	Cdc5l	cell division cycle 5-like protein [Mus musculus]	33	228	4.06119e+06	7.10231e+07	6.48882e+07	8.58863e+07	7.18992e+07	6.69619e+07	6.0827e+07	8.18251e+07	6.7838e+07	0.829061
113205057	UBTF	High mobility group, HMG1/HMG2|High mobility group, superfamily	Ubtf	nucleolar transcription factor 1 isoform 1 [Mus musculus]	21	162	2.2703e+07	6.15455e+07	5.0313e+07	7.07142e+07	6.14997e+07	3.88425e+07	2.761e+07	4.80111e+07	3.87966e+07	0.808075
6678303	TFAM	High mobility group, HMG1/HMG2|High mobility group, superfamily	Tfam	transcription factor A, mitochondrial precursor [Mus musculus]	14	210	9.15791e+06	6.01614e+08	6.26354e+08	6.31261e+08	4.99582e+08	5.92456e+08	6.17196e+08	6.22103e+08	4.90424e+08	0.788332
40254124	SMARCA5	SNF2-related|SANT, DNA-binding|DNA/RNA helicase, C-terminal|Homeodomain-like|DEAD-like helicase, N-terminal|Helicase, superfamily 1/2, ATP-binding domain|ATPase, nucleosome remodelling ISWI, HAND domain|SLIDE|SANT, eukarya	Smarca5	SWI/SNF-related matrix-associated actin-dependent regulator of chromatin subfamily A member 5 [Mus musculus]	38	151	9.46721e+06	5.22648e+07	2.8184e+07	1.16372e+08	8.76964e+07	4.27976e+07	1.87168e+07	1.06904e+08	7.82292e+07	0.731769
83921568	NR1I3	Nuclear hormone receptor, ligand-binding, core|Zinc finger, nuclear hormone receptor-type|Nuclear hormone receptor, ligand-binding|Zinc finger, NHR/GATA-type|Vitamin D receptor|Steroid hormone receptor|Thyroid hormone receptor	Nr1i3	nuclear receptor subfamily 1 group I member 3 isoform 1 [Mus musculus]	5	16	1.89729e+06	7.47159e+06	5.05672e+06	5.49485e+06	4.34843e+06	5.5743e+06	3.15943e+06	3.59756e+06	2.45114e+06	0.681335
12963561	KLF15	Zinc finger, C2H2-type|Zinc finger, C2H2-type/integrase, DNA-binding|Zinc finger, C2H2-like	Klf15	Krueppel-like factor 15 [Mus musculus]	1	3	0	0	1.05792e+06	954371	649216	0	1.05792e+06	954371	649216	0.680255
31982165	IKZF5	Zinc finger, C2H2-type|Zinc finger, C2H2-like	Ikzf5	zinc finger protein Pegasus [Mus musculus]	2	6	3.47831e+06	2.53587e+06	0	1.82741e+06	2.36716e+06	-942438	-3.47831e+06	-1.6509e+06	-1.11114e+06	0.673055
21312242	ZFP655	Zinc finger, C2H2-type|Zinc finger, C2H2-type/integrase, DNA-binding|Zinc finger, C2H2-like	Zfp655	zinc finger protein 655 isoform a [Mus musculus]	8	23	2.13875e+06	2.80461e+06	2.77447e+06	2.95862e+06	2.58081e+06	665866	635719	819873	442058	0.539179
31982421	YY1	Zinc finger, C2H2-type|Zinc finger, C2H2-type/integrase, DNA-binding|Zinc finger, C2H2-like|Transcription factor yin/yang	Yy1	transcriptional repressor protein YY1 [Mus musculus]	7	30	2.11026e+06	1.37834e+07	1.22727e+07	5.5918e+07	1.20064e+07	1.16731e+07	1.01624e+07	5.38077e+07	9.89618e+06	0.183917
254553392	ZFP512	Zinc finger, C2H2-type|Zinc finger, C2H2-like	Zfp512	zinc finger protein 512 [Mus musculus]	15	104	1.28082e+07	3.21116e+07	1.38836e+07	4.34207e+07	1.82276e+07	1.93034e+07	1.07536e+06	3.06124e+07	5.41941e+06	0.177033
31044459	CTCF	Zinc finger, C2H2-type|Zinc finger, C2H2-type/integrase, DNA-binding|Zinc finger, C2H2-like	Ctcf	transcriptional repressor CTCF [Mus musculus]	11	40	5.66199e+06	1.31484e+07	4.42604e+07	1.53356e+07	7.36446e+06	7.48642e+06	3.85984e+07	9.67363e+06	1.70247e+06	0.175991
126157488	ZFP800	Zinc finger, C2H2-type|Zinc finger, C2H2-like	Zfp800	zinc finger protein 800 [Mus musculus]	3	7	3.37736e+06	4.13337e+06	3.08889e+06	4.9461e+06	3.5416e+06	756017	0	1.56874e+06	164248	0.1047
133778915	HMGN5	High mobility group protein HMG14/HMG17	Hmgn5	high mobility group nucleosome-binding domain-containing protein 5 [Mus musculus]	3	5	0	0	437156	627443	0	0	437156	627443	0	0
6677853	NKX1-2	Homeobox, conserved site|Homeobox|Homeodomain-like|Homeodomain-related|Homeobox, region	Nkx1-2	NK1 transcription factor-related protein 2 [Mus musculus]	1	4	0	0	4.48079e+07	99158427	0	0	4.48079e+07	99158427	0	0
117647238	ZBTB7A	BTB/POZ-like|Zinc finger, C2H2-type|BTB/POZ fold|BTB/POZ|Zinc finger, C2H2-type/integrase, DNA-binding|Zinc finger, C2H2-like	Zbtb7a	zinc finger and BTB domain-containing protein 7A [Mus musculus]	2	4	0	0	600225	4.14247e+06	0	0	600225	4.14247e+06	0	0
165377130	ZFP276	Zinc finger, C2H2-type|Zinc finger, AD-type|Zinc finger, C2H2-type/integrase, DNA-binding|Zinc finger, C2H2-like	Zfp276	zinc finger protein 276 [Mus musculus]	1	1	0	0	0	163199	0	0	0	163199	0	0
112421097	SMARCC1	Chromo domain|SANT, DNA-binding|BRCT|SWIRM|Homeodomain-like|Myb, DNA-binding|SANT, eukarya	Smarcc1	SWI/SNF complex subunit SMARCC1 [Mus musculus]	7	23	0	2.36984e+06	2.56419e+06	1.15697e+06	0	2.36984e+06	2.56419e+06	1.15697e+06	0	0
121247453	NR3C1	Nuclear hormone receptor, ligand-binding, core|Glucocorticoid receptor|Zinc finger, nuclear hormone receptor-type|Nuclear hormone receptor, ligand-binding|Zinc finger, NHR/GATA-type|Steroid hormone receptor	Nr3c1	glucocorticoid receptor [Mus musculus]	2	6	0	1.98613e+06	702066	391966	0	1.98613e+06	702066	391966	0	0
33468913	NR1I2	Nuclear hormone receptor, ligand-binding, core|Zinc finger, nuclear hormone receptor-type|Nuclear hormone receptor, ligand-binding|Zinc finger, NHR/GATA-type|Vitamin D receptor|Steroid hormone receptor	Nr1i2	nuclear receptor subfamily 1 group I member 2 isoform 1 [Mus musculus]	2	2	0	958578	0	2.01728e+06	0	958578	0	2.01728e+06	0	0
188497644	NOC3L	CCAAT-binding factor|Nucleolar complex-associated|Nucleolar complex-associated protein 3	Noc3l	nucleolar complex protein 3 homolog [Mus musculus]	6	14	3.57215e+06	5.50923e+06	2.94075e+06	9.71977e+06	1.5759e+06	1.93708e+06	0	6.14762e+06	0	0
120587007	BCL11B	Zinc finger, C2H2-type|Zinc finger, C2H2-type/integrase, DNA-binding|Zinc finger, C2H2-like	Bcl11b	B-cell lymphoma/leukemia 11B isoform a [Mus musculus]	1	4	8.02006e+07	1.18399e+08	6.71161e+07	187704438	0	3.81984e+07	0	1.07504e+08	0	0
67188876	CEBPZ	CCAAT-binding factor|Armadillo-type fold	Cebpz	CCAAT/enhancer-binding protein zeta [Mus musculus]	11	25	7.31682e+06	1.26323e+07	3.31831e+06	1.18148e+07	3.264e+06	5.31551e+06	0	4.49796e+06	0	0
28076891	ZFP422	Zinc finger, C2H2-type|Zinc finger, C2H2-type/integrase, DNA-binding|Zinc finger, C2H2-like	Zfp422	zinc finger protein 22 [Mus musculus]	6	43	2.03298e+07	2.62598e+07	1.11808e+07	4.41016e+07	1.5222e+07	5.92999e+06	0	2.37717e+07	0	0

## Sheet: Pck1p TFs
Accession	Gene			Description	# Peptides	# PSMs	Liver NC	Pck1p fast	Pck1p refed	G6pcp fast	G6pcp refed	Pck1p-Fast	Pck1p-refed	G6pc-Fast	G6pc-Refed	Pck1p R/F
6677659	DNAJC2	Heat shock protein DnaJ, conserved site|SANT, DNA-binding|Heat shock protein DnaJ, N-terminal|Homeodomain-like|Myb, DNA-binding|SANT, eukarya|Molecular chaperone, heat shock protein, Hsp40, DnaJ	Dnajc2	dnaJ homolog subfamily C member 2 [Mus musculus]	1	1	0	0	0	0	517362	0	0	0	517362	#DIV/0!	Consider not bind to Pck1p
27754097	DR1	Transcription factor CBF/NF-Y/archaeal histone|Histone-fold|Transcription factor, CBFA/NFYB, DNA topoisomerase	Dr1	protein Dr1 [Mus musculus]	2	2	0	0	0	0	7.62438e+06	0	0	0	7.62438e+06	#DIV/0!
6679627	ELF1	Ets|Winged helix-turn-helix transcription repressor DNA-binding|Transcription factor Elf-1, N-terminal	Elf1	ETS-related transcription factor Elf-1 [Mus musculus]	1	1	0	0	0	0	0	0	0	0	0	#DIV/0!
153792362	ELK4	Ets|Winged helix-turn-helix transcription repressor DNA-binding	Elk4	ETS domain-containing protein Elk-4 [Mus musculus]	6	13	0	0	0	1.65591e+07	3.62767e+07	0	0	1.65591e+07	3.62767e+07	#DIV/0!
16716509	FOXP1	Transcription factor, fork head, conserved site|Transcription factor, fork head|Winged helix-turn-helix transcription repressor DNA-binding|Zinc finger, C2H2-like	Foxp1	forkhead box protein P1 isoform 1 [Mus musculus]	1	1	0	0	0	0	0	0	0	0	0	#DIV/0!
34328119	GABPA	Ets|Sterile alpha motif/pointed|Sterile alpha motif homology|Winged helix-turn-helix transcription repressor DNA-binding|Sterile alpha motif-type|Transcription factor, GA-binding, alpha subunit	Gabpa	GA-binding protein alpha chain [Mus musculus]	6	10	0	0	0	2.77358e+06	7.20597e+06	0	0	2.77358e+06	7.20597e+06	#DIV/0!
253683481	HMG20B	High mobility group, HMG1/HMG2, subgroup|High mobility group, HMG1/HMG2|High mobility group, superfamily	Hmg20b	SWI/SNF-related matrix-associated actin-dependent regulator of chromatin subfamily E member 1-related [Mus musculus]	1	1	0	0	0	0	0	0	0	0	0	#DIV/0!
6754210	HMGA2	HMG-I/HMG-Y, DNA-binding, conserved site|AT hook, DNA-binding motif|High mobility group, HMG-I/HMG-Y|A.T hook-like	Hmga2	high mobility group protein HMGI-C [Mus musculus]	1	2	0	0	0	0	3.70638e+06	0	0	0	3.70638e+06	#DIV/0!
6680229	HMGB2	HMG box A DNA-binding domain, conserved site|High mobility group, HMG1/HMG2, subgroup|High mobility group, HMG1/HMG2|High mobility group, superfamily	Hmgb2	high mobility group protein B2 [Mus musculus]	1	1	0	0	0	0	5.06142e+06	0	0	0	5.06142e+06	#DIV/0!
120300925	HOXB3	Homeobox protein, antennapedia type, conserved site|Homeobox, conserved site|Homeobox|Homeodomain-like|Homeodomain-related|Homeobox, region	Hoxb3	homeobox protein Hox-B3 [Mus musculus]	2	3	0	0	0	0	575988	0	0	0	575988	#DIV/0!
31981130	KLF13	Zinc finger, C2H2-type|Zinc finger, C2H2-type/integrase, DNA-binding|Zinc finger, C2H2-like	Klf13	Krueppel-like factor 13 [Mus musculus]	1	1	0	0	0	0	0	0	0	0	0	#DIV/0!
6754850	NFYB	Transcription factor, NFYB/HAP3, conserved site|Transcription factor CBF/NF-Y/archaeal histone|Histone-fold|Transcription factor, CBFA/NFYB, DNA topoisomerase	Nfyb	nuclear transcription factor Y subunit beta [Mus musculus]	1	1	0	0	0	0	59566682	0	0	0	59566682	#DIV/0!
293336061	RARA	Nuclear hormone receptor, ligand-binding, core|Zinc finger, nuclear hormone receptor-type|Nuclear hormone receptor, ligand-binding|Steroid hormone receptor|Retinoic acid receptor	Rara	retinoic acid receptor alpha isoform 1 [Mus musculus]	1	1	0	0	0	0	0	0	0	0	0	#DIV/0!
71037397	RFX5	DNA-binding RFX|Winged helix-turn-helix transcription repressor DNA-binding	Rfx5	DNA-binding protein Rfx5 [Mus musculus]	1	1	0	0	0	0	0	0	0	0	0	#DIV/0!
327315356	RXRB	Nuclear hormone receptor, ligand-binding, core|Zinc finger, nuclear hormone receptor-type|Nuclear hormone receptor, ligand-binding|Zinc finger, NHR/GATA-type|Retinoid X receptor|Steroid hormone receptor	Rxrb	retinoic acid receptor RXR-beta isoform 1 [Mus musculus]	6	40	0	0	0	0	0	0	0	0	0	#DIV/0!
128485774	STAT6	SH2 motif|p53-like transcription factor, DNA-binding|EF-hand-like domain|STAT transcription factor, DNA-binding, subdomain|STAT transcription factor, protein interaction|STAT transcription factor, all-alpha|STAT transcription factor, DNA-binding|STAT transcription factor, coiled coil|STAT transcription factor, core	Stat6	signal transducer and transcription activator 6 [Mus musculus]	1	1	0	0	0	0	0	0	0	0	0	#DIV/0!
226958409	TEF	Basic-leucine zipper (bZIP) transcription factor|Basic leucine zipper	Tef	thyrotroph embryonic factor isoform 2 [Mus musculus]	5	8	0	0	0	0	2.07485e+06	0	0	0	2.07485e+06	#DIV/0!
85701534	ZBTB45	BTB/POZ-like|Zinc finger, C2H2-type|BTB/POZ fold|BTB/POZ|Zinc finger, C2H2-type/integrase, DNA-binding|Zinc finger, C2H2-like	Zbtb45	zinc finger and BTB domain-containing protein 45 [Mus musculus]	3	26	0	0	0	0	1.20034e+07	0	0	0	1.20034e+07	#DIV/0!
47059087	ZBTB7B	BTB/POZ-like|Zinc finger, C2H2-type|BTB/POZ fold|BTB/POZ|Zinc finger, C2H2-type/integrase, DNA-binding|Zinc finger, C2H2-like	Zbtb7b	zinc finger and BTB domain-containing protein 7B [Mus musculus]	1	1	0	0	0	0	0	0	0	0	0	#DIV/0!
165377130	ZFP276	Zinc finger, C2H2-type|Zinc finger, AD-type|Zinc finger, C2H2-type/integrase, DNA-binding|Zinc finger, C2H2-like	Zfp276	zinc finger protein 276 [Mus musculus]	1	1	0	0	0	163199	0	0	0	163199	0	#DIV/0!
30425348	ZFP446	Krueppel-associated box|Transcription regulator SCAN|Zinc finger, C2H2-type|Zinc finger, C2H2-type/integrase, DNA-binding|Zinc finger, C2H2-like	Zfp446	zinc finger protein 446 isoform 1 [Mus musculus]	1	1	0	0	0	0	0	0	0	0	0	#DIV/0!
29244118	ZFP637	Zinc finger, C2H2-type|Zinc finger, C2H2-type/integrase, DNA-binding|Zinc finger, C2H2-like	Zfp637	zinc finger protein 32 [Mus musculus]	1	1	765806	0	0	0	0	0	0	0	0	#DIV/0!
254553274	ZFP746	Krueppel-associated box|Zinc finger, C2H2-type|Zinc finger, C2H2-type/integrase, DNA-binding|Zinc finger, C2H2-like|Protein of unknown function DUF3669, zinc finger protein	Zfp746	zinc finger protein 746 [Mus musculus]	1	1	0	0	0	0	942952	0	0	0	942952	#DIV/0!
27804319	ZKSCAN1	Krueppel-associated box|Transcription regulator SCAN|Zinc finger, C2H2-type|Zinc finger, C2H2-type/integrase, DNA-binding|Zinc finger, C2H2-like	Zkscan1	zinc finger protein with KRAB and SCAN domains 1 isoform 1 [Mus musculus]	2	2	0	0	0	0	0	0	0	0	0	#DIV/0!
90093349	ADNP	Homeobox|Zinc finger, C2H2-type|Homeodomain-like|Zinc finger, C2H2-like	Adnp	activity-dependent neuroprotector homeobox protein [Mus musculus]	1	1	0	0	3.0104e+06	0	0	0	3.0104e+06	0	0	#DIV/0!
74136557	ARID5B	ARID/BRIGHT DNA-binding domain	Arid5b	AT-rich interactive domain-containing protein 5B [Mus musculus]	3	4	0	0	1.45509e+06	0	2.29559e+06	0	1.45509e+06	0	2.29559e+06	#DIV/0!
62177117	BAZ2B	Bromodomain, conserved site|Bromodomain|Methyl-CpG DNA binding|Zinc finger, PHD-type|DDT domain|Zinc finger, FYVE/PHD-type|DNA-binding, integrase-type|DDT domain, subgroup|DDT domain superfamily|Zinc finger, PHD-finger	Baz2b	bromodomain adjacent to zinc finger domain, 2B [Mus musculus]	1	1	0	0	319605	0	0	0	319605	0	0	#DIV/0!
6755680	BHLHE40	Helix-loop-helix DNA-binding domain|Orange|Helix-loop-helix DNA-binding|Orange subgroup	Bhlhe40	class E basic helix-loop-helix protein 40 [Mus musculus]	1	2	0	0	3.31823e+06	0	5.93311e+06	0	3.31823e+06	0	5.93311e+06	#DIV/0!
46369479	CEBPE	Basic-leucine zipper (bZIP) transcription factor|Basic leucine zipper|CCAAT/enhancer-binding	Cebpe	CCAAT/enhancer-binding protein epsilon [Mus musculus]	1	2	0	0	3.61797e+06	0	0	0	3.61797e+06	0	0	#DIV/0!
47059495	CSDA	Cold-shock conserved site|Cold-shock protein, DNA-binding|Cold shock protein|Nucleic acid-binding, OB-fold|Nucleic acid-binding, OB-fold-like	Ybx3	Y-box-binding protein 3 long isoform [Mus musculus]	6	43	0	0	4.67259e+06	0	0	0	4.67259e+06	0	0	#DIV/0!
110835729	CUX1	Homeobox, conserved site|Homeobox|Homeodomain protein CUT|Homeodomain-like|Homeodomain-related|CASP, C-terminal	Cux1	protein CASP isoform a [Mus musculus]	3	3	0	0	1.14918e+06	0	2.43551e+06	0	1.14918e+06	0	2.43551e+06	#DIV/0!
12963705	ELF2	Ets|Winged helix-turn-helix transcription repressor DNA-binding|Transcription factor Elf-1, N-terminal	Elf2	ETS-related transcription factor Elf-2 [Mus musculus]	3	6	0	0	739846	0	4.60058e+06	0	739846	0	4.60058e+06	#DIV/0!
6753774	ESRRG	Nuclear hormone receptor, ligand-binding, core|Zinc finger, nuclear hormone receptor-type|Nuclear hormone receptor, ligand-binding|Zinc finger, NHR/GATA-type|Retinoid X receptor|Steroid hormone receptor	Esrrg	estrogen-related receptor gamma isoform1 [Mus musculus]	3	3	0	0	2.09931e+06	0	0	0	2.09931e+06	0	0	#DIV/0!
66793398	FOXA1	Transcription factor, fork head, conserved site|Transcription factor, fork head|Winged helix-turn-helix transcription repressor DNA-binding|Fork-head N-terminal|Forkhead box protein, C-terminal	Foxa1	hepatocyte nuclear factor 3-alpha [Mus musculus]	3	6	0	0	1.72777e+06	0	1.23506e+07	0	1.72777e+06	0	1.23506e+07	#DIV/0!
153945804	FOXA2	Transcription factor, fork head, conserved site|Transcription factor, fork head|Winged helix-turn-helix transcription repressor DNA-binding|Fork-head N-terminal|Forkhead box protein, C-terminal	Foxa2	hepatocyte nuclear factor 3-beta [Mus musculus]	2	3	0	0	792187	0	2.28825e+06	0	792187	0	2.28825e+06	#DIV/0!
34328255	FOXO1	Transcription factor, fork head, conserved site|Transcription factor, fork head|Winged helix-turn-helix transcription repressor DNA-binding	Foxo1	forkhead box protein O1 [Mus musculus]	2	2	0	0	811572	0	0	0	811572	0	0	#DIV/0!
46909571	GATA6	Zinc finger, GATA-type|GATA-type transcription activator, N-terminal|Zinc finger, NHR/GATA-type	Gata6	transcription factor GATA-6 [Mus musculus]	2	3	0	0	3.18164e+06	0	0	0	3.18164e+06	0	0	#DIV/0!
31982951	HLF	Basic-leucine zipper (bZIP) transcription factor|Basic leucine zipper	Hlf	hepatic leukemia factor [Mus musculus]	1	1	0	0	3.93774e+06	0	0	0	3.93774e+06	0	0	#DIV/0!
6680231	HMGB3	HMG box A DNA-binding domain, conserved site|High mobility group, HMG1/HMG2, subgroup|High mobility group, HMG1/HMG2|High mobility group, superfamily	Hmgb3	high mobility group protein B3 [Mus musculus]	2	5	0	0	1.09085e+07	1.16446e+07	1.41591e+07	0	1.09085e+07	1.16446e+07	1.41591e+07	#DIV/0!
133778915	HMGN5	High mobility group protein HMG14/HMG17	Hmgn5	high mobility group nucleosome-binding domain-containing protein 5 [Mus musculus]	3	5	0	0	437156	627443	0	0	437156	627443	0	#DIV/0!
12963561	KLF15	Zinc finger, C2H2-type|Zinc finger, C2H2-type/integrase, DNA-binding|Zinc finger, C2H2-like	Klf15	Krueppel-like factor 15 [Mus musculus]	1	3	0	0	1.05792e+06	954371	649216	0	1.05792e+06	954371	649216	#DIV/0!
6754610	MAFG	Maf transcription factor|Basic-leucine zipper (bZIP) transcription factor|Eukaryotic transcription factor, Skn-1-like, DNA-binding	Mafg	transcription factor MafG [Mus musculus]	1	2	0	0	1.74276e+06	0	6.90354e+06	0	1.74276e+06	0	6.90354e+06	#DIV/0!
114155153	MAZ	Zinc finger, C2H2-type|Zinc finger, C2H2-type/integrase, DNA-binding|Zinc finger, C2H2-like	Maz	myc-associated zinc finger protein [Mus musculus]	2	11	0	0	833201	0	0	0	833201	0	0	#DIV/0!
34328263	MLXIPL	Helix-loop-helix DNA-binding domain|Helix-loop-helix DNA-binding	Mlxipl	carbohydrate-responsive element-binding protein [Mus musculus]	2	3	0	0	6.27355e+06	0	4.5508e+06	0	6.27355e+06	0	4.5508e+06	#DIV/0!
31543307	NAB1	Nab1, C-terminal|Nab, N-terminal|NAB co-repressor, conserved region 2	Nab1	NGFI-A-binding protein 1 [Mus musculus]	1	1	0	0	1.1169e+06	0	0	0	1.1169e+06	0	0	#DIV/0!
161016831	NFYA	CCAAT-binding factor, conserved site|CCAAT-binding transcription factor, subunit B	Nfya	nuclear transcription factor Y subunit alpha isoform a [Mus musculus]	2	9	0	0	1.42752e+06	6.56119e+06	1.87511e+07	0	1.42752e+06	6.56119e+06	1.87511e+07	#DIV/0!
114326538	NFYC	Transcription factor CBF/NF-Y/archaeal histone|Histone-fold	Nfyc	nuclear transcription factor Y subunit gamma isoform 1 [Mus musculus]	4	9	0	0	4.7865e+06	1.2522e+07	4.01156e+07	0	4.7865e+06	1.2522e+07	4.01156e+07	#DIV/0!
6677853	NKX1-2	Homeobox, conserved site|Homeobox|Homeodomain-like|Homeodomain-related|Homeobox, region	Nkx1-2	NK1 transcription factor-related protein 2 [Mus musculus]	1	4	0	0	4.48079e+07	99158427	0	0	4.48079e+07	99158427	0	#DIV/0!
112807199	NR2F6	Nuclear hormone receptor, ligand-binding, core|Zinc finger, nuclear hormone receptor-type|Nuclear hormone receptor, ligand-binding|Zinc finger, NHR/GATA-type|Zinc finger, C4-type, C-terminal domain|Steroid hormone receptor|Transcription factor COUP	Nr2f6	nuclear receptor subfamily 2 group F member 6 [Mus musculus]	3	9	0	0	7.70091e+06	0	1.81322e+06	0	7.70091e+06	0	1.81322e+06	#DIV/0!
34365779	PBX1	Homeobox, conserved site|Homeobox|PBX|Homeodomain-like|Homeodomain-related	Pbx1	pre-B-cell leukemia transcription factor 1 isoform a [Mus musculus]	2	4	0	0	1.25743e+07	0	0	0	1.25743e+07	0	0	#DIV/0!
8567384	PBX2	Homeobox, conserved site|Homeobox|PBX|Homeodomain-like|Homeodomain-related	Pbx2	pre-B-cell leukemia transcription factor 2 [Mus musculus]	2	4	0	0	862130	0	0	0	862130	0	0	#DIV/0!
6677829	RXRG	Nuclear hormone receptor, ligand-binding, core|Zinc finger, nuclear hormone receptor-type|Nuclear hormone receptor, ligand-binding|Retinoid X receptor|Steroid hormone receptor|Protein of unknown function DUF3345	Rxrg	retinoic acid receptor RXR-gamma isoform 1 [Mus musculus]	6	31	0	0	4.60641e+06	0	5.67615e+06	0	4.60641e+06	0	5.67615e+06	#DIV/0!
38348308	RYBP	Zinc finger, RanBP2-type	Rybp	RING1 and YY1-binding protein [Mus musculus]	2	5	0	0	4.05975e+06	1.18406e+06	6.31785e+06	0	4.05975e+06	1.18406e+06	6.31785e+06	#DIV/0!
27753981	SREBF1	Helix-loop-helix DNA-binding domain|Helix-loop-helix DNA-binding	Srebf1	sterol regulatory element-binding protein 1 precursor [Mus musculus]	4	4	0	0	3.18066e+06	0	0	0	3.18066e+06	0	0	#DIV/0!
298676444	TADA2B	Zinc finger, ZZ-type|SANT, DNA-binding|Homeodomain-like|Myb, DNA-binding|SANT, eukarya|Transcriptional adaptor 2	Tada2b	transcriptional adaptor 2B [Mus musculus]	1	3	0	0	2.67391e+06	3.00884e+06	6.08836e+06	0	2.67391e+06	3.00884e+06	6.08836e+06	#DIV/0!
218931186	TCF7L2	High mobility group, HMG1/HMG2|High mobility group, superfamily|CTNNB1 binding, N-teminal	Tcf7l2	transcription factor 7-like 2 isoform 4 [Mus musculus]	7	18	0	0	1.5301e+07	1.02721e+07	3.40473e+07	0	1.5301e+07	1.02721e+07	3.40473e+07	#DIV/0!
262205246	TEAD1	TEA/ATTS|Transcriptional enhancer factor	Tead1	transcriptional enhancer factor TEF-1 isoform 1 [Mus musculus]	7	22	0	0	5.8683e+06	0	862719	0	5.8683e+06	0	862719	#DIV/0!
117647238	ZBTB7A	BTB/POZ-like|Zinc finger, C2H2-type|BTB/POZ fold|BTB/POZ|Zinc finger, C2H2-type/integrase, DNA-binding|Zinc finger, C2H2-like	Zbtb7a	zinc finger and BTB domain-containing protein 7A [Mus musculus]	2	4	0	0	600225	4.14247e+06	0	0	600225	4.14247e+06	0	#DIV/0!
161353485	ZFP187	Transcription regulator SCAN|Zinc finger, C2H2-type|Zinc finger, C2H2-type/integrase, DNA-binding|Zinc finger, C2H2-like	Zscan26	zinc finger and SCAN domain-containing protein 26 [Mus musculus]	1	5	3.37021e+06	2.56057e+06	4.23553e+06	5.15745e+06	5.12846e+06	0	865314	1.78724e+06	1.75825e+06	#DIV/0!
169234810	ZFP292	Zinc finger, C2H2-type|Zinc finger, C2H2-like	Zfp292	zinc finger protein 292 [Mus musculus]	2	4	0	0	3.79764e+06	0	1.64309e+06	0	3.79764e+06	0	1.64309e+06	#DIV/0!
40254353	ZFP319	Zinc finger, C2H2-type|Zinc finger, C2H2-type/integrase, DNA-binding|Zinc finger, C2H2-like	Zfp319	zinc finger protein 319 [Mus musculus]	2	13	0	0	382955	0	0	0	382955	0	0	#DIV/0!
90669983	ZFP91	Zinc finger, C2H2-type|Zinc finger, C2H2-like	Zfp91	E3 ubiquitin-protein ligase ZFP91 [Mus musculus]	1	1	0	0	401208	0	0	0	401208	0	0	#DIV/0!
109627663	ZHX1	Homeobox|Zinc finger, C2H2-type|Homeodomain-like|Homeodomain-related|Zinc finger, C2H2-like	Zhx1	zinc fingers and homeoboxes protein 1 [Mus musculus]	8	17	0	0	3.83266e+06	2.07257e+06	2.77114e+07	0	3.83266e+06	2.07257e+06	2.77114e+07	#DIV/0!
6680241	ONECUT1	Homeobox|Homeodomain protein CUT|Homeodomain-like|Homeodomain-related	Onecut1	hepatocyte nuclear factor 6 [Mus musculus]	15	180	0	603769	1.77754e+08	1.68578e+08	4.68584e+08	603769	1.77754e+08	1.68578e+08	4.68584e+08	294.407
67906168	NR2C2	Nuclear hormone receptor, ligand-binding, core|Zinc finger, nuclear hormone receptor-type|Nuclear hormone receptor, ligand-binding|Zinc finger, NHR/GATA-type|Vitamin D receptor|Steroid hormone receptor	Nr2c2	nuclear receptor subfamily 2 group C member 2 [Mus musculus]	15	21	0	1.01056e+06	1.7311e+07	0	863435	1.01056e+06	1.7311e+07	0	863435	17.1301
171846245	NR2C1	Nuclear hormone receptor, ligand-binding, core|Zinc finger, nuclear hormone receptor-type|Nuclear hormone receptor, ligand-binding|Zinc finger, NHR/GATA-type|Vitamin D receptor|Steroid hormone receptor	Nr2c1	nuclear receptor subfamily 2 group C member 1 [Mus musculus]	2	5	0	671435	8.70207e+06	0	0	671435	8.70207e+06	0	0	12.9604
110225364	ZFHX3	Homeobox, conserved site|Homeobox|Zinc finger, U1-type|Zinc finger, C2H2-type|Homeodomain-like|Homeodomain-related|Zinc finger, C2H2-type/integrase, DNA-binding|Zinc finger, C2H2-like	Zfhx3	zinc finger homeobox protein 3 [Mus musculus]	22	39	0	2.25464e+06	2.21686e+07	0	1.03235e+07	2.25464e+06	2.21686e+07	0	1.03235e+07	9.83243
13626034	TFAP4	Helix-loop-helix DNA-binding domain|Helix-loop-helix DNA-binding	Tfap4	transcription factor AP-4 [Mus musculus]	5	9	0	5.4114e+06	4.84559e+07	0	3.41971e+06	5.4114e+06	4.84559e+07	0	3.41971e+06	8.95442
170650717	DBP	Basic-leucine zipper (bZIP) transcription factor|Basic leucine zipper	Dbp	D site-binding protein [Mus musculus]	5	16	0	3.58323e+06	3.20202e+07	0	1.50326e+06	3.58323e+06	3.20202e+07	0	1.50326e+06	8.93614
31542626	HMBOX1	Homeobox|Hepatocyte nuclear factor 1, N-terminal|Homeodomain-like|Lambda repressor-like, DNA-binding|Homeodomain-related	Hmbox1	homeobox-containing protein 1 [Mus musculus]	10	39	0	5.2854e+06	4.62526e+07	3.29409e+06	2.05286e+07	5.2854e+06	4.62526e+07	3.29409e+06	2.05286e+07	8.751
169646141	ZBTB44	BTB/POZ-like|Zinc finger, C2H2-type|BTB/POZ fold|BTB/POZ|Zinc finger, C2H2-type/integrase, DNA-binding|Zinc finger, C2H2-like	Zbtb44	zinc finger and BTB domain-containing protein 44 isoform a [Mus musculus]	3	7	586375	1.01153e+06	3.24353e+06	577947	2.90528e+06	425156	2.65716e+06	-8427.58	2.3189e+06	6.24984
254911067	NR1H4	Nuclear hormone receptor, ligand-binding, core|Zinc finger, nuclear hormone receptor-type|Nuclear hormone receptor, ligand-binding|Zinc finger, NHR/GATA-type|Vitamin D receptor|Steroid hormone receptor	Nr1h4	bile acid receptor isoform 1 [Mus musculus]	12	55	0	4.14756e+06	2.54971e+07	3.6687e+06	2.23296e+07	4.14756e+06	2.54971e+07	3.6687e+06	2.23296e+07	6.1475
111185900	HNF1B	Homeobox|Hepatocyte nuclear factor 1, beta isoform, C-terminal|Hepatocyte nuclear factor 1, N-terminal|Homeodomain-like|Lambda repressor-like, DNA-binding|Homeodomain-related	Hnf1b	hepatocyte nuclear factor 1-beta [Mus musculus]	5	18	0	1.33744e+06	7.81786e+06	1.73382e+06	1.24714e+07	1.33744e+06	7.81786e+06	1.73382e+06	1.24714e+07	5.84538
14010847	NR5A2	Nuclear hormone receptor, ligand-binding, core|Zinc finger, nuclear hormone receptor-type|Nuclear hormone receptor, ligand-binding|Zinc finger, NHR/GATA-type|Vitamin D receptor|Steroid hormone receptor|Orphan nuclear receptor Fushi-tarazu factor 1	Nr5a2	nuclear receptor subfamily 5 group A member 2 isoform 1 [Mus musculus]	13	104	0	7.88562e+06	4.16026e+07	6.41536e+07	1.10242e+08	7.88562e+06	4.16026e+07	6.41536e+07	1.10242e+08	5.27575
31044459	CTCF	Zinc finger, C2H2-type|Zinc finger, C2H2-type/integrase, DNA-binding|Zinc finger, C2H2-like	Ctcf	transcriptional repressor CTCF [Mus musculus]	11	40	5.66199e+06	1.31484e+07	4.42604e+07	1.53356e+07	7.36446e+06	7.48642e+06	3.85984e+07	9.67363e+06	1.70247e+06	5.15578
38327623	TBX3	Transcription factor, T-box, conserved site|p53-like transcription factor, DNA-binding|Transcription factor, T-box	Tbx3	T-box transcription factor TBX3 isoform 2 [Mus musculus]	12	34	0	6.20361e+06	2.64334e+07	2.28448e+06	1.01528e+07	6.20361e+06	2.64334e+07	2.28448e+06	1.01528e+07	4.26097
172073171	TBP	Transcription factor TFIID, C-terminal/DNA glycosylase, N-terminal|Beta2-adaptin/TATA-box binding, C-terminal|TATA-box binding	Tbp	TATA-box-binding protein [Mus musculus]	4	15	0	1.0453e+07	4.40786e+07	0	4.24836e+07	1.0453e+07	4.40786e+07	0	4.24836e+07	4.21684
6680732	ARNTL	PAS|Helix-loop-helix DNA-binding domain|Helix-loop-helix DNA-binding|PAS fold-3|PAS fold|Nuclear translocator|PAC motif	Arntl	aryl hydrocarbon receptor nuclear translocator-like protein 1 isoform 1 [Mus musculus]	10	24	0	4.89043e+06	2.04474e+07	3.96797e+06	8.34811e+06	4.89043e+06	2.04474e+07	3.96797e+06	8.34811e+06	4.18111
13775156	XBP1	Basic-leucine zipper (bZIP) transcription factor|Basic leucine zipper	Xbp1	X-box-binding protein 1 isoform XBP1(U) [Mus musculus]	5	18	0	1.95967e+06	7.9942e+06	1.26239e+06	7.01849e+06	1.95967e+06	7.9942e+06	1.26239e+06	7.01849e+06	4.07935
22507329	E2F4	Transcription factor E2F/dimerisation partner (TDP)|Winged helix-turn-helix transcription repressor DNA-binding|E2F Family	E2f4	transcription factor E2F4 [Mus musculus]	2	3	0	413364	1.63542e+06	0	0	413364	1.63542e+06	0	0	3.95636
21313424	DRAP1	Transcription factor CBF/NF-Y/archaeal histone|Histone-fold	Drap1	dr1-associated corepressor [Mus musculus]	2	6	0	5.07527e+06	1.98455e+07	0	1.64292e+07	5.07527e+06	1.98455e+07	0	1.64292e+07	3.91023
157384990	TFE3	Helix-loop-helix DNA-binding domain|Helix-loop-helix DNA-binding|Protein of unknown function DUF3371	Tfe3	transcription factor E3 isoform a [Mus musculus]	9	38	0	1.41011e+07	5.50459e+07	0	6.87251e+06	1.41011e+07	5.50459e+07	0	6.87251e+06	3.90366
6756049	ZFP148	Zinc finger, C2H2-type|Zinc finger, C2H2-type/integrase, DNA-binding|Zinc finger, C2H2-like	Zfp148	zinc finger protein 148 [Mus musculus]	12	43	0	1.25474e+07	4.7538e+07	1.12826e+06	2.47987e+06	1.25474e+07	4.7538e+07	1.12826e+06	2.47987e+06	3.78868
7106459	CLOCK	PAS|Helix-loop-helix DNA-binding domain|Helix-loop-helix DNA-binding|PAS fold-3|PAS fold|Nuclear translocator|PAC motif	Clock	circadian locomoter output cycles protein kaput [Mus musculus]	12	37	0	6.04947e+06	2.25784e+07	2.68036e+06	7.64658e+06	6.04947e+06	2.25784e+07	2.68036e+06	7.64658e+06	3.7323
31982165	IKZF5	Zinc finger, C2H2-type|Zinc finger, C2H2-like	Ikzf5	zinc finger protein Pegasus [Mus musculus]	2	6	3.47831e+06	2.53587e+06	0	1.82741e+06	2.36716e+06	-942438	-3.47831e+06	-1.6509e+06	-1.11114e+06	3.69075
82546826	FOXK1	Transcription factor, fork head, conserved site|Forkhead-associated|Transcription factor, fork head|SMAD/FHA domain	Foxk1	forkhead box protein K1 [Mus musculus]	3	8	0	1.62849e+06	5.05582e+06	1.15138e+06	5.7338e+06	1.62849e+06	5.05582e+06	1.15138e+06	5.7338e+06	3.1046
112293262	ESRRA	Nuclear hormone receptor, ligand-binding, core|Zinc finger, nuclear hormone receptor-type|Nuclear hormone receptor, ligand-binding|Zinc finger, NHR/GATA-type|Retinoid X receptor|Steroid hormone receptor	Esrra	steroid hormone receptor ERR1 [Mus musculus]	9	30	0	1.05391e+07	3.16015e+07	3.2156e+06	1.73175e+07	1.05391e+07	3.16015e+07	3.2156e+06	1.73175e+07	2.9985
45598394	NR2F2	Nuclear hormone receptor, ligand-binding, core|Zinc finger, nuclear hormone receptor-type|Nuclear hormone receptor, ligand-binding|Zinc finger, NHR/GATA-type|Zinc finger, C4-type, C-terminal domain|Steroid hormone receptor|Transcription factor COUP	Nr2f2	COUP transcription factor 2 isoform 1 [Mus musculus]	5	18	0	6.85663e+06	1.98283e+07	4.39949e+06	1.35209e+07	6.85663e+06	1.98283e+07	4.39949e+06	1.35209e+07	2.89185
6679042	NFIC	CTF transcription factor/nuclear factor 1, conserved site|MAD homology 1, Dwarfin-type|CTF transcription factor/nuclear factor 1, DNA-binding domain|CTF transcription factor/nuclear factor 1|CTF transcription factor/nuclear factor 1, N-terminal	Nfic	nuclear factor 1 C-type isoform a [Mus musculus]	17	130	1.03021e+06	6.84566e+07	1.9576e+08	5.83308e+07	2.0358e+08	6.74264e+07	1.9473e+08	5.73006e+07	2.0255e+08	2.88804
239835744	TFEB	Helix-loop-helix DNA-binding domain|Helix-loop-helix DNA-binding|Protein of unknown function DUF3371	Tfeb	transcription factor EB isoform a [Mus musculus]	11	64	0	1.30705e+07	3.76147e+07	0	8.49214e+06	1.30705e+07	3.76147e+07	0	8.49214e+06	2.87783
166295202	HNF1A	Homeobox|Hepatocyte nuclear factor 1, beta isoform, C-terminal|Hepatocyte nuclear factor 1, alpha isoform C-terminal|Hepatocyte nuclear factor 1, N-terminal|Homeodomain-like|Lambda repressor-like, DNA-binding|Homeodomain-related	Hnf1a	hepatocyte nuclear factor 1-alpha [Mus musculus]	12	108	0	2.94103e+07	8.40753e+07	3.76535e+07	1.75908e+08	2.94103e+07	8.40753e+07	3.76535e+07	1.75908e+08	2.8587
294979205	WIZ	Zinc finger, C2H2-type|Zinc finger, C2H2-like	Wiz	protein Wiz isoform 1 [Mus musculus]	3	5	0	1.04511e+06	2.94568e+06	0	2.1792e+06	1.04511e+06	2.94568e+06	0	2.1792e+06	2.81854
119220568	ONECUT2	Homeobox|Homeodomain protein CUT|Homeodomain-like|Homeodomain-related	Onecut2	one cut domain family member 2 [Mus musculus]	13	110	0	1.51923e+07	4.15367e+07	6.30909e+07	2.17675e+08	1.51923e+07	4.15367e+07	6.30909e+07	2.17675e+08	2.73406
46909569	GATA4	Zinc finger, GATA-type|GATA-type transcription activator, N-terminal|Zinc finger, NHR/GATA-type|Transcription factor GATA-4/5/6	Gata4	transcription factor GATA-4 [Mus musculus]	5	49	0	2.46205e+07	6.71917e+07	1.03062e+07	3.08509e+07	2.46205e+07	6.71917e+07	1.03062e+07	3.08509e+07	2.7291
19745144	CREB1	Coactivator CBP, pKID|Basic-leucine zipper (bZIP) transcription factor|bZIP transcription factor, bZIP-1|cAMP response element binding (CREB) protein	Creb1	cyclic AMP-responsive element-binding protein 1 isoform B [Mus musculus]	3	13	0	5.0264e+06	1.3021e+07	5.49964e+06	8.80945e+06	5.0264e+06	1.3021e+07	5.49964e+06	8.80945e+06	2.59051
295424118	RREB1	Zinc finger, C2H2-type|Zinc finger, C2H2-type/integrase, DNA-binding|Zinc finger, C2H2-like	Rreb1	ras-responsive element-binding protein 1 isoform 2 [Mus musculus]	20	61	0	7.06422e+06	1.80501e+07	2.33343e+06	2.76681e+07	7.06422e+06	1.80501e+07	2.33343e+06	2.76681e+07	2.55515
86198301	CEBPA	Basic-leucine zipper (bZIP) transcription factor|Basic leucine zipper|CCAAT/enhancer-binding	Cebpa	CCAAT/enhancer-binding protein alpha [Mus musculus]	8	93	3.34231e+06	3.32467e+08	8.16271e+08	9.7005e+07	3.78716e+08	3.29124e+08	8.12929e+08	9.36627e+07	3.75374e+08	2.46998
15022805	HMG20A	High mobility group, HMG1/HMG2|High mobility group, superfamily	Hmg20a	high mobility group protein 20A [Mus musculus]	2	5	0	6.53922e+06	1.59212e+07	2.69876e+06	7.14714e+06	6.53922e+06	1.59212e+07	2.69876e+06	7.14714e+06	2.43473
117414176	VEZF1	Zinc finger, C2H2-type|Zinc finger, C2H2-type/integrase, DNA-binding|Zinc finger, C2H2-like	Vezf1	vascular endothelial zinc finger 1 [Mus musculus]	3	21	0	5.43443e+06	1.29267e+07	3.65138e+06	1.04924e+07	5.43443e+06	1.29267e+07	3.65138e+06	1.04924e+07	2.37867
6679483	PROX1	Homeodomain-like|Homeobox prospero-like	Prox1	prospero homeobox protein 1 [Mus musculus]	11	43	0	4.42131e+06	1.00909e+07	7.67973e+06	1.16524e+07	4.42131e+06	1.00909e+07	7.67973e+06	1.16524e+07	2.28233
37674207	GZF1	BTB/POZ-like|Zinc finger, C2H2-type|BTB/POZ fold|BTB/POZ|Zinc finger, C2H2-type/integrase, DNA-binding|Zinc finger, C2H2-like	Gzf1	GDNF-inducible zinc finger protein 1 [Mus musculus]	5	13	1.0909e+06	1.7329e+06	2.54144e+06	2.08186e+06	2.27581e+06	641998	1.45054e+06	990955	1.1849e+06	2.25941
158508460	AHCTF1	AT hook, DNA-binding motif	Ahctf1	protein ELYS [Mus musculus]	66	452	5.4166e+06	6.21851e+07	1.28859e+08	6.92693e+07	2.28621e+08	5.67685e+07	1.23443e+08	6.38527e+07	2.23204e+08	2.1745
46575916	HNF4A	Nuclear hormone receptor, ligand-binding, core|Zinc finger, nuclear hormone receptor-type|Nuclear hormone receptor, ligand-binding|Retinoid X receptor|Steroid hormone receptor	Hnf4a	hepatocyte nuclear factor 4-alpha [Mus musculus]	8	80	4.12299e+06	1.00596e+08	2.12888e+08	6.2736e+07	2.03398e+08	9.64729e+07	2.08765e+08	5.8613e+07	1.99275e+08	2.16397
257196201	ZBTB20	BTB/POZ-like|Zinc finger, C2H2-type|BTB/POZ fold|BTB/POZ|Zinc finger, C2H2-type/integrase, DNA-binding|Zinc finger, C2H2-like	Zbtb20	zinc finger and BTB domain-containing protein 20 isoform L [Mus musculus]	18	231	4.79126e+06	6.09812e+07	1.20345e+08	6.61399e+07	5.41692e+08	5.61899e+07	1.15554e+08	6.13487e+07	5.36901e+08	2.05648
40789094	ZHX2	Homeobox|Zinc finger, C2H2-type|Homeodomain-like|Homeodomain-related|Zinc finger, C2H2-like	Zhx2	zinc fingers and homeoboxes protein 2 [Mus musculus]	18	55	0	5.89522e+06	1.20977e+07	6.03324e+06	4.11587e+07	5.89522e+06	1.20977e+07	6.03324e+06	4.11587e+07	2.05213
126517474	NFIX	CTF transcription factor/nuclear factor 1, conserved site|MAD homology 1, Dwarfin-type|CTF transcription factor/nuclear factor 1, DNA-binding domain|CTF transcription factor/nuclear factor 1|CTF transcription factor/nuclear factor 1, N-terminal	Nfix	nuclear factor 1 X-type isoform 3 [Mus musculus]	13	169	2.44072e+06	6.40996e+07	1.20834e+08	8.46579e+07	1.73621e+08	6.16589e+07	1.18393e+08	8.22172e+07	1.71181e+08	1.92013
6754538	LHX2	Homeobox, conserved site|Homeobox|Zinc finger, LIM-type|Homeodomain-like|Homeodomain-related	Lhx2	LIM/homeobox protein Lhx2 [Mus musculus]	5	11	0	3.87623e+06	6.88643e+06	2.94082e+06	1.10469e+07	3.87623e+06	6.88643e+06	2.94082e+06	1.10469e+07	1.77658
163965420	NFIB	CTF transcription factor/nuclear factor 1, conserved site|MAD homology 1, Dwarfin-type|CTF transcription factor/nuclear factor 1, DNA-binding domain|CTF transcription factor/nuclear factor 1|CTF transcription factor/nuclear factor 1, N-terminal	Nfib	nuclear factor 1 B-type isoform 1 [Mus musculus]	14	97	2.3579e+06	4.48118e+07	7.69767e+07	4.87827e+07	1.19657e+08	4.24539e+07	7.46188e+07	4.64248e+07	1.17299e+08	1.75764
171846256	NFIA	CTF transcription factor/nuclear factor 1, conserved site|MAD homology 1, Dwarfin-type|CTF transcription factor/nuclear factor 1, DNA-binding domain|CTF transcription factor/nuclear factor 1|CTF transcription factor/nuclear factor 1, N-terminal	Nfia	nuclear factor 1 A-type isoform 1 [Mus musculus]	14	146	0	5.91532e+07	1.03732e+08	4.25994e+07	9.51684e+07	5.91532e+07	1.03732e+08	4.25994e+07	9.51684e+07	1.75362
110625908	NR1D1	Nuclear hormone receptor, ligand-binding, core|Zinc finger, nuclear hormone receptor-type|Nuclear hormone receptor, ligand-binding|Zinc finger, NHR/GATA-type|Vitamin D receptor|Steroid hormone receptor	Nr1d1	nuclear receptor subfamily 1 group D member 1 [Mus musculus]	1	3	0	875646	1.51648e+06	0	1.91429e+06	875646	1.51648e+06	0	1.91429e+06	1.73184
12963557	DMAP1	SANT, DNA-binding|DNA methyltransferase 1-associated 1	Dmap1	DNA methyltransferase 1-associated protein 1 [Mus musculus]	7	15	0	2.6072e+06	4.38097e+06	3.1557e+06	4.09555e+06	2.6072e+06	4.38097e+06	3.1557e+06	4.09555e+06	1.68033
126352391	ZFP384	Zinc finger, C2H2-type|Zinc finger, C2H2-type/integrase, DNA-binding|Zinc finger, C2H2-like	Zfp384	zinc finger protein 384 isoform 1 [Mus musculus]	8	43	1521299	6.18971e+06	9.28887e+06	5.09819e+06	1.3887e+07	4.66841e+06	7.76757e+06	3.57689e+06	1.23657e+07	1.66386
40254321	ZHX3	Homeobox|Homeodomain-like|Homeodomain-related|Zinc finger, C2H2-like	Zhx3	zinc fingers and homeoboxes protein 3 [Mus musculus]	14	39	0	4.15413e+06	6.83507e+06	2.59611e+06	2.44273e+07	4.15413e+06	6.83507e+06	2.59611e+06	2.44273e+07	1.64537
226874810	MLX	Helix-loop-helix DNA-binding domain|Helix-loop-helix DNA-binding	Mlx	max-like protein X isoform gamma [Mus musculus]	4	10	0	3.63332e+06	5.87653e+06	2.21045e+06	2.83584e+06	3.63332e+06	5.87653e+06	2.21045e+06	2.83584e+06	1.6174
61966683	CEBPG	Basic-leucine zipper (bZIP) transcription factor|Basic leucine zipper	Cebpg	CCAAT/enhancer-binding protein gamma [Mus musculus]	3	8	0	1.21295e+07	1.87067e+07	0	2.41923e+07	1.21295e+07	1.87067e+07	0	2.41923e+07	1.54225
113205067	ZFX	Transcriptional activator, Zfx / Zfy domain|Zinc finger, C2H2-type|Zinc finger, C2H2-type/integrase, DNA-binding|Zinc finger, C2H2-like	Zfx	zinc finger X-chromosomal protein [Mus musculus]	6	53	185105	9.83874e+06	1.49311e+07	1.2314e+07	1.16666e+07	9.65363e+06	1.4746e+07	1.21289e+07	1.14815e+07	1.52751
6755384	RXRA	Nuclear hormone receptor, ligand-binding, core|Zinc finger, nuclear hormone receptor-type|Nuclear hormone receptor, ligand-binding|Retinoid X receptor|Steroid hormone receptor|Protein of unknown function DUF3345	Rxra	retinoic acid receptor RXR-alpha [Mus musculus]	12	91	0	3.88831e+07	5.79364e+07	2.51426e+07	3.73508e+07	3.88831e+07	5.79364e+07	2.51426e+07	3.73508e+07	1.49002
19526802	ERG	Ets|Sterile alpha motif/pointed|Sterile alpha motif homology|Winged helix-turn-helix transcription repressor DNA-binding|Sterile alpha motif-type	Erg	transcriptional regulator ERG [Mus musculus]	3	7	0	1.08144e+06	1.55929e+06	1.00766e+07	1.61721e+07	1.08144e+06	1.55929e+06	1.00766e+07	1.61721e+07	1.44186
113205059	YBX1	Cold-shock conserved site|Cold-shock protein, DNA-binding|Cold shock protein|Nucleic acid-binding, OB-fold|Nucleic acid-binding, OB-fold-like	Ybx1	nuclease-sensitive element-binding protein 1 [Mus musculus]	12	127	4.6435e+07	1.11131e+08	1.38823e+08	8.21505e+07	7.80912e+07	6.46956e+07	9.23876e+07	3.57155e+07	3.16562e+07	1.42804
166706891	TCF20	Zinc finger, PHD-type	Tcf20	transcription factor 20 isoform a [Mus musculus]	4	17	0	4.88536e+06	6.95576e+06	2461876	5.10111e+06	4.88536e+06	6.95576e+06	2461876	5.10111e+06	1.4238
134032032	UBP1	CP2 transcription factor|Sterile alpha motif homology	Ubp1	upstream-binding protein 1 isoform a [Mus musculus]	9	28	0	1.35794e+07	1.90082e+07	8.99051e+06	1.25022e+07	1.35794e+07	1.90082e+07	8.99051e+06	1.25022e+07	1.39978
8393627	IRF3	Interferon regulatory factor, conserved site|Interferon regulatory factor|SMAD/FHA domain|Winged helix-turn-helix transcription repressor DNA-binding|SMAD domain-like|Interferon regulatory factor-3	Irf3	interferon regulatory factor 3 [Mus musculus]	7	32	0	1.98205e+07	2.66575e+07	1.54277e+07	1.96765e+07	1.98205e+07	2.66575e+07	1.54277e+07	1.96765e+07	1.34494
159032064	SALL1	Zinc finger, C2H2-type|Zinc finger, C2H2-type/integrase, DNA-binding|Zinc finger, C2H2-like	Sall1	sal-like protein 1 [Mus musculus]	2	5	0	2.483e+06	3.27046e+06	1.89614e+06	3.46287e+06	2.483e+06	3.27046e+06	1.89614e+06	3.46287e+06	1.31714
91598896	MTA1	Zinc finger, GATA-type|ELM2|SANT, DNA-binding|Bromo adjacent homology (BAH) domain|Homeodomain-like|SANT, eukarya	Mta1	metastasis-associated protein MTA1 [Mus musculus]	5	12	0	409911	522345	792164	2.66626e+06	409911	522345	792164	2.66626e+06	1.27429
194328715	ZFP207	Zinc finger, C2H2-type|Zinc finger, C2H2-like	Zfp207	zinc finger protein 207 isoform 1 [Mus musculus]	3	15	0	2.28532e+07	2.82796e+07	1.5079e+07	3.67384e+07	2.28532e+07	2.82796e+07	1.5079e+07	3.67384e+07	1.23744
262331578	HMGA1	HMG-I/HMG-Y, DNA-binding, conserved site|AT hook, DNA-binding motif|High mobility group, HMG-I/HMG-Y|A.T hook-like	Hmga1	high mobility group protein HMG-I/HMG-Y isoform a [Mus musculus]	5	23	0	1.07946e+07	1.29053e+07	1.46511e+07	7.18985e+07	1.07946e+07	1.29053e+07	1.46511e+07	7.18985e+07	1.19554
94400775	RBPJ	Cell surface receptor IPT/TIG|p53-like transcription factor, DNA-binding|Immunoglobulin-like fold|Immunoglobulin E-set|Beta-trefoil|LAG1, DNA binding	Rbpj	recombining binding protein suppressor of hairless isoform 1 [Mus musculus]	9	34	0	1.58423e+07	1.88619e+07	7.14198e+06	1.21592e+07	1.58423e+07	1.88619e+07	7.14198e+06	1.21592e+07	1.1906
66955886	PDS5B	AT hook, DNA-binding motif|Armadillo-type fold	Pds5b	sister chromatid cohesion protein PDS5 homolog B [Mus musculus]	45	223	0	4.58751e+07	5.38614e+07	4.10094e+07	6.43485e+07	4.58751e+07	5.38614e+07	4.10094e+07	6.43485e+07	1.17409
224809352	ZKSCAN3	Krueppel-associated box|Transcription regulator SCAN|Zinc finger, C2H2-type|Zinc finger, C2H2-type/integrase, DNA-binding|Zinc finger, C2H2-like	Zkscan3	zinc finger protein with KRAB and SCAN domains 3 [Mus musculus]	2	5	0	9.86587e+07	1.15005e+08	1.31013e+06	2.44212e+08	9.86587e+07	1.15005e+08	1.31013e+06	2.44212e+08	1.16568
226437608	GCFC1	GC-rich sequence DNA-binding factor-like	Paxbp1	PAX3- and PAX7-binding protein 1 [Mus musculus]	15	53	873899	1.23813e+07	1.39888e+07	1.90346e+07	1.77565e+07	1.15074e+07	1.31149e+07	1.81607e+07	1.68826e+07	1.13969
196049391	TEAD3	TEA/ATTS|Transcriptional enhancer factor	Tead3	transcriptional enhancer factor TEF-5 isoform 1 [Mus musculus]	5	11	0	1.57409e+06	1.72264e+06	0	746883	1.57409e+06	1.72264e+06	0	746883	1.09437
112421097	SMARCC1	Chromo domain|SANT, DNA-binding|BRCT|SWIRM|Homeodomain-like|Myb, DNA-binding|SANT, eukarya	Smarcc1	SWI/SNF complex subunit SMARCC1 [Mus musculus]	7	23	0	2.36984e+06	2.56419e+06	1.15697e+06	0	2.36984e+06	2.56419e+06	1.15697e+06	0	1.08201
124487369	ZFP362	Zinc finger, C2H2-type|Zinc finger, C2H2-type/integrase, DNA-binding|Zinc finger, C2H2-like	Zfp362	zinc finger protein 362 [Mus musculus]	3	21	0	1.87057e+06	1.97012e+06	0	1.97901e+06	1.87057e+06	1.97012e+06	0	1.97901e+06	1.05322
166706895	TOX4	High mobility group, HMG1/HMG2, subgroup|High mobility group, HMG1/HMG2|High mobility group, superfamily	Tox4	TOX high mobility group box family member 4 [Mus musculus]	10	47	0	1.89515e+07	1.97731e+07	7.05485e+06	1.66555e+07	1.89515e+07	1.97731e+07	7.05485e+06	1.66555e+07	1.04335
6678303	TFAM	High mobility group, HMG1/HMG2|High mobility group, superfamily	Tfam	transcription factor A, mitochondrial precursor [Mus musculus]	14	210	9.15791e+06	6.01614e+08	6.26354e+08	6.31261e+08	4.99582e+08	5.92456e+08	6.17196e+08	6.22103e+08	4.90424e+08	1.04176
70887767	HIC2	BTB/POZ-like|Zinc finger, C2H2-type|BTB/POZ fold|BTB/POZ|Zinc finger, C2H2-type/integrase, DNA-binding|Zinc finger, C2H2-like	Hic2	hypermethylated in cancer 2 protein [Mus musculus]	1	4	0	7.02511e+06	7.11386e+06	5.51193e+06	7.01968e+06	7.02511e+06	7.11386e+06	5.51193e+06	7.01968e+06	1.01263
124249109	ARID1A	ARID/BRIGHT DNA-binding domain|Protein of unknown function DUF3518	Arid1a	AT-rich interactive domain-containing protein 1A [Mus musculus]	19	48	0	9.80402e+06	9.91774e+06	5.89989e+06	1.14258e+07	9.80402e+06	9.91774e+06	5.89989e+06	1.14258e+07	1.0116
10181166	SMARCE1	High mobility group, HMG1/HMG2|High mobility group, superfamily	Smarce1	SWI/SNF-related matrix-associated actin-dependent regulator of chromatin subfamily E member 1 [Mus musculus]	12	56	0	1.67687e+07	1.63117e+07	1.05994e+07	1.17783e+07	1.67687e+07	1.63117e+07	1.05994e+07	1.17783e+07	0.972747
31544063	ZFP260	Zinc finger, C2H2-type|Zinc finger, C2H2-type/integrase, DNA-binding|Zinc finger, C2H2-like	Zfp260	zinc finger protein 260 [Mus musculus]	1	2	0	1.81767e+06	1.73563e+06	0	0	1.81767e+06	1.73563e+06	0	0	0.954865
21312242	ZFP655	Zinc finger, C2H2-type|Zinc finger, C2H2-type/integrase, DNA-binding|Zinc finger, C2H2-like	Zfp655	zinc finger protein 655 isoform a [Mus musculus]	8	23	2.13875e+06	2.80461e+06	2.77447e+06	2.95862e+06	2.58081e+06	665866	635719	819873	442058	0.954725
257196177	ZNF512B	Zinc finger, C2H2-type|Zinc finger, C2H2-like	Znf512b	zinc finger protein 512B [Mus musculus]	4	15	0	4.1733e+06	3.93203e+06	9.23077e+06	7.8559e+06	4.1733e+06	3.93203e+06	9.23077e+06	7.8559e+06	0.942187
22779899	CDC5L	SANT, DNA-binding|Homeodomain-like|Homeodomain-related|Myb, DNA-binding|HTH transcriptional regulator, Myb-type, DNA-binding|Myb transcription factor|Protein of unknown function DUF3351	Cdc5l	cell division cycle 5-like protein [Mus musculus]	33	228	4.06119e+06	7.10231e+07	6.48882e+07	8.58863e+07	7.18992e+07	6.69619e+07	6.0827e+07	8.18251e+07	6.7838e+07	0.908382
255982546	NRF1	Nuclear respiratory factor-1, activation binding domain|Nuclear respiratory factor 1, NLS/DNA-binding, dimerisation domain	Nrf1	nuclear respiratory factor 1 isoform b [Mus musculus]	4	7	0	5.11668e+06	4.62119e+06	2.41313e+06	4.48414e+06	5.11668e+06	4.62119e+06	2.41313e+06	4.48414e+06	0.903162
160948575	TERF2IP	Homeodomain-like|Homeodomain-related|Rap1 Myb	Terf2ip	telomeric repeat-binding factor 2-interacting protein 1 [Mus musculus]	8	19	0	4066680	3.57421e+06	2.86661e+06	3.52947e+06	4066680	3.57421e+06	2.86661e+06	3.52947e+06	0.878902
31982421	YY1	Zinc finger, C2H2-type|Zinc finger, C2H2-type/integrase, DNA-binding|Zinc finger, C2H2-like|Transcription factor yin/yang	Yy1	transcriptional repressor protein YY1 [Mus musculus]	7	30	2.11026e+06	1.37834e+07	1.22727e+07	5.5918e+07	1.20064e+07	1.16731e+07	1.01624e+07	5.38077e+07	9.89618e+06	0.870584
119226255	SP1	Zinc finger, C2H2-type|Zinc finger, C2H2-type/integrase, DNA-binding|Zinc finger, C2H2-like	Sp1	transcription factor Sp1 [Mus musculus]	1	7	0	1.91225e+06	1.61061e+06	2.02291e+06	3.85722e+06	1.91225e+06	1.61061e+06	2.02291e+06	3.85722e+06	0.842255
166235125	SMARCC2	Chromo domain|SANT, DNA-binding|BRCT|SWIRM|Homeodomain-like|Myb, DNA-binding|SANT, eukarya	Smarcc2	SWI/SNF complex subunit SMARCC2 isoform 1 [Mus musculus]	30	117	1.04264e+06	2.66912e+07	2.17085e+07	1.57579e+07	1.80376e+07	2.56485e+07	2.06658e+07	1.47153e+07	1.69949e+07	0.805732
51491880	MTA2	Zinc finger, GATA-type|ELM2|SANT, DNA-binding|Bromo adjacent homology (BAH) domain|SANT, eukarya	Mta2	metastasis-associated protein MTA2 [Mus musculus]	17	57	1.4252e+06	1.75283e+07	1.40226e+07	8.46059e+06	1.51443e+07	1.61031e+07	1.25974e+07	7.03539e+06	1.37191e+07	0.782299
347658945	REPIN1	Zinc finger, C2H2-type|Zinc finger, C2H2-type/integrase, DNA-binding|Zinc finger, C2H2-like	Repin1	replication initiator 1 isoform c [Mus musculus]	3	10	0	4.32901e+06	3.33626e+06	3.46795e+06	4.42854e+06	4.32901e+06	3.33626e+06	3.46795e+06	4.42854e+06	0.770675
113205057	UBTF	High mobility group, HMG1/HMG2|High mobility group, superfamily	Ubtf	nucleolar transcription factor 1 isoform 1 [Mus musculus]	21	162	2.2703e+07	6.15455e+07	5.0313e+07	7.07142e+07	6.14997e+07	3.88425e+07	2.761e+07	4.80111e+07	3.87966e+07	0.710819
145553997	ARID1B	ARID/BRIGHT DNA-binding domain|Protein of unknown function DUF3518	Arid1b	AT rich interactive domain 1B (Swi1 like) [Mus musculus]	7	17	0	7.93372e+06	5.62103e+06	0	0	7.93372e+06	5.62103e+06	0	0	0.708499
8393832	NFIL3	Basic-leucine zipper (bZIP) transcription factor|Vertebrate interleukin-3 regulated transcription factor|Basic leucine zipper|Transcription factor, basic leucine zipper, E4BP4	Nfil3	nuclear factor interleukin-3-regulated protein [Mus musculus]	7	13	0	1.38154e+07	9.38059e+06	1.75948e+06	3.36086e+07	1.38154e+07	9.38059e+06	1.75948e+06	3.36086e+07	0.678997
6753404	CEBPB	Basic-leucine zipper (bZIP) transcription factor|Basic leucine zipper|CCAAT/enhancer-binding	Cebpb	CCAAT/enhancer-binding protein beta [Mus musculus]	7	92	0	3.67986e+08	2.36003e+08	1.04726e+08	1.44118e+08	3.67986e+08	2.36003e+08	1.04726e+08	1.44118e+08	0.641337
110347410	CEBPD	Basic-leucine zipper (bZIP) transcription factor|Basic leucine zipper|CCAAT/enhancer-binding	Cebpd	CCAAT/enhancer-binding protein delta [Mus musculus]	1	2	0	1.64245e+07	1.02746e+07	0	0	1.64245e+07	1.02746e+07	0	0	0.625564
8394435	TEF	Basic-leucine zipper (bZIP) transcription factor|Basic leucine zipper	Tef	thyrotroph embryonic factor isoform 1 [Mus musculus]	6	11	0	4.53713e+06	2.74369e+06	0	0	4.53713e+06	2.74369e+06	0	0	0.60472
41406074	HMGN1	High mobility group protein HMG14/HMG17	Hmgn1	non-histone chromosomal protein HMG-14 [Mus musculus]	3	13	244491	1.49861e+07	9.0499e+06	6.91845e+06	6.02385e+06	1.47416e+07	8.80541e+06	6.67396e+06	5.77936e+06	0.597315
40254249	NFRKB	-	Nfrkb	nuclear factor related to kappa-B-binding protein [Mus musculus]	5	5	0	3.07077e+06	1.79176e+06	0	0	3.07077e+06	1.79176e+06	0	0	0.58349
83921568	NR1I3	Nuclear hormone receptor, ligand-binding, core|Zinc finger, nuclear hormone receptor-type|Nuclear hormone receptor, ligand-binding|Zinc finger, NHR/GATA-type|Vitamin D receptor|Steroid hormone receptor|Thyroid hormone receptor	Nr1i3	nuclear receptor subfamily 1 group I member 3 isoform 1 [Mus musculus]	5	16	1.89729e+06	7.47159e+06	5.05672e+06	5.49485e+06	4.34843e+06	5.5743e+06	3.15943e+06	3.59756e+06	2.45114e+06	0.566784
255759921	NFATC1	Cell surface receptor IPT/TIG|p53-like transcription factor, DNA-binding|Rel homology|Immunoglobulin-like fold|Immunoglobulin E-set|Nuclear factor of activated T cells (NFAT), subgroup|Nuclear factor of activated T cells (NFAT)|Nuclear factor of activated T-cells 1	Nfatc1	nuclear factor of activated T-cells, cytoplasmic 1 isoform 4 [Mus musculus]	3	10	0	4.12958e+06	2.24184e+06	798060	5.16734e+06	4.12958e+06	2.24184e+06	798060	5.16734e+06	0.542874
21314854	GATAD2B	Zinc finger, GATA-type	Gatad2b	transcriptional repressor p66-beta [Mus musculus]	5	15	0	7.8203e+06	3.86711e+06	2.38553e+06	8.21045e+06	7.8203e+06	3.86711e+06	2.38553e+06	8.21045e+06	0.494497
40254124	SMARCA5	SNF2-related|SANT, DNA-binding|DNA/RNA helicase, C-terminal|Homeodomain-like|DEAD-like helicase, N-terminal|Helicase, superfamily 1/2, ATP-binding domain|ATPase, nucleosome remodelling ISWI, HAND domain|SLIDE|SANT, eukarya	Smarca5	SWI/SNF-related matrix-associated actin-dependent regulator of chromatin subfamily A member 5 [Mus musculus]	38	151	9.46721e+06	5.22648e+07	2.8184e+07	1.16372e+08	8.76964e+07	4.27976e+07	1.87168e+07	1.06904e+08	7.82292e+07	0.437333
121247453	NR3C1	Nuclear hormone receptor, ligand-binding, core|Glucocorticoid receptor|Zinc finger, nuclear hormone receptor-type|Nuclear hormone receptor, ligand-binding|Zinc finger, NHR/GATA-type|Steroid hormone receptor	Nr3c1	glucocorticoid receptor [Mus musculus]	2	6	0	1.98613e+06	702066	391966	0	1.98613e+06	702066	391966	0	0.353484
164519134	GATAD2A	Zinc finger, GATA-type	Gatad2a	transcriptional repressor p66 alpha isoform b [Mus musculus]	10	22	0	9.64061e+06	1.73478e+06	0	3.77208e+06	9.64061e+06	1.73478e+06	0	3.77208e+06	0.179945
133904142	TERF2	SANT, DNA-binding|Homeodomain-like|Homeodomain-related|Telomere repeat-binding factor, dimerisation domain|Myb, DNA-binding|HTH transcriptional regulator, Myb-type, DNA-binding|Telomeric repeat-binding factor 1, Pin2	Terf2	telomeric repeat-binding factor 2 isoform 1 [Mus musculus]	4	7	0	2.14001e+06	215180	542549	532817	2.14001e+06	215180	542549	532817	0.100551
254553392	ZFP512	Zinc finger, C2H2-type|Zinc finger, C2H2-like	Zfp512	zinc finger protein 512 [Mus musculus]	15	104	1.28082e+07	3.21116e+07	1.38836e+07	4.34207e+07	1.82276e+07	1.93034e+07	1.07536e+06	3.06124e+07	5.41941e+06	0.0557085
114205435	BAZ2A	AT hook, DNA-binding motif|Bromodomain, conserved site|Bromodomain|Methyl-CpG DNA binding|Zinc finger, PHD-type|DDT domain|Zinc finger, FYVE/PHD-type|DNA-binding, integrase-type|DDT domain, subgroup|DDT domain superfamily|Zinc finger, PHD-finger	Baz2a	bromodomain adjacent to zinc finger domain protein 2A [Mus musculus]	1	1	0	957423	0	0	0	957423	0	0	0	0
6753644	DLX1	Homeobox, conserved site|Helix-turn-helix motif, lambda-like repressor|Homeobox|Homeodomain-like|Homeodomain-related|Homeobox, region	Dlx1	homeobox protein DLX-1 [Mus musculus]	8	39	0	3.49633e+08	0	0	0	3.49633e+08	0	0	0	0
153945880	EP400	SNF2-related|SANT, DNA-binding|DNA/RNA helicase, C-terminal|HSA|Homeodomain-like|HAS subgroup|DEAD-like helicase, N-terminal|Helicase/SANT-associated, DNA binding|Helicase, superfamily 1/2, ATP-binding domain|MYB-like	Ep400	E1A-binding protein p400 isoform 1 [Mus musculus]	1	2	0	1.20331e+06	0	0	0	1.20331e+06	0	0	0	0
6680582	KLF3	Zinc finger, C2H2-type|Zinc finger, C2H2-type/integrase, DNA-binding|Zinc finger, C2H2-like	Klf3	Krueppel-like factor 3 [Mus musculus]	1	1	0	2.3945e+06	0	0	0	2.3945e+06	0	0	0	0
113199769	NFATC3	Cell surface receptor IPT/TIG|p53-like transcription factor, DNA-binding|Rel homology|Immunoglobulin-like fold|Immunoglobulin E-set|Nuclear factor of activated T cells (NFAT), subgroup|Nuclear factor of activated T cells (NFAT)	Nfatc3	nuclear factor of activated T-cells, cytoplasmic 3 [Mus musculus]	2	3	0	2.51687e+06	0	0	0	2.51687e+06	0	0	0	0
6678507	NR1H2	Nuclear hormone receptor, ligand-binding, core|Zinc finger, nuclear hormone receptor-type|Nuclear hormone receptor, ligand-binding|Zinc finger, NHR/GATA-type|Vitamin D receptor|Steroid hormone receptor	Nr1h2	oxysterols receptor LXR-beta [Mus musculus]	1	1	0	902883	0	0	0	902883	0	0	0	0
33468913	NR1I2	Nuclear hormone receptor, ligand-binding, core|Zinc finger, nuclear hormone receptor-type|Nuclear hormone receptor, ligand-binding|Zinc finger, NHR/GATA-type|Vitamin D receptor|Steroid hormone receptor	Nr1i2	nuclear receptor subfamily 1 group I member 2 isoform 1 [Mus musculus]	2	2	0	958578	0	2.01728e+06	0	958578	0	2.01728e+06	0	0
164663880	PPARA	Nuclear hormone receptor, ligand-binding, core|Zinc finger, nuclear hormone receptor-type|Nuclear hormone receptor, ligand-binding|Zinc finger, NHR/GATA-type|Steroid hormone receptor|Peroxisome proliferator-activated receptor|Peroxisome proliferator-activated receptor, alpha	Ppara	peroxisome proliferator-activated receptor alpha [Mus musculus]	4	7	0	2.94656e+06	0	1.52608e+06	1.48334e+06	2.94656e+06	0	1.52608e+06	1.48334e+06	0
65301157	SP3	Zinc finger, C2H2-type|Zinc finger, C2H2-type/integrase, DNA-binding|Zinc finger, C2H2-like	Sp3	transcription factor Sp3 isoform 1 [Mus musculus]	1	2	0	790229	0	0	0	790229	0	0	0	0
71037383	ZBTB43	BTB/POZ-like|Zinc finger, C2H2-type|BTB/POZ fold|BTB/POZ|Zinc finger, C2H2-type/integrase, DNA-binding|Zinc finger, C2H2-like	Zbtb43	zinc finger and BTB domain-containing protein 43 isoform a [Mus musculus]	2	3	0	3.22239e+06	0	0	3.69133e+06	3.22239e+06	0	0	3.69133e+06	0
162135948	ZFP160	Krueppel-associated box|Zinc finger, C2H2-type|Zinc finger, C2H2-type/integrase, DNA-binding|Zinc finger, C2H2-like	Zfp160	zinc finger protein 160 [Mus musculus]	2	14	0	641461	0	0	0	641461	0	0	0	0
161086992	ZFP709	Krueppel-associated box|Zinc finger, C2H2-type|Zinc finger, C2H2-type/integrase, DNA-binding|Zinc finger, C2H2-like	Zfp709	zinc finger protein 709 [Mus musculus]	2	13	0	3.1623e+06	0	0	0	3.1623e+06	0	0	0	0
188497644	NOC3L	CCAAT-binding factor|Nucleolar complex-associated|Nucleolar complex-associated protein 3	Noc3l	nucleolar complex protein 3 homolog [Mus musculus]	6	14	3.57215e+06	5.50923e+06	2.94075e+06	9.71977e+06	1.5759e+06	1.93708e+06	0	6.14762e+06	0	0
120587007	BCL11B	Zinc finger, C2H2-type|Zinc finger, C2H2-type/integrase, DNA-binding|Zinc finger, C2H2-like	Bcl11b	B-cell lymphoma/leukemia 11B isoform a [Mus musculus]	1	4	8.02006e+07	1.18399e+08	6.71161e+07	187704438	0	3.81984e+07	0	1.07504e+08	0	0
126157488	ZFP800	Zinc finger, C2H2-type|Zinc finger, C2H2-like	Zfp800	zinc finger protein 800 [Mus musculus]	3	7	3.37736e+06	4.13337e+06	3.08889e+06	4.9461e+06	3.5416e+06	756017	0	1.56874e+06	164248	0
67188876	CEBPZ	CCAAT-binding factor|Armadillo-type fold	Cebpz	CCAAT/enhancer-binding protein zeta [Mus musculus]	11	25	7.31682e+06	1.26323e+07	3.31831e+06	1.18148e+07	3.264e+06	5.31551e+06	0	4.49796e+06	0	0
28076891	ZFP422	Zinc finger, C2H2-type|Zinc finger, C2H2-type/integrase, DNA-binding|Zinc finger, C2H2-like	Zfp422	zinc finger protein 22 [Mus musculus]	6	43	2.03298e+07	2.62598e+07	1.11808e+07	4.41016e+07	1.5222e+07	5.92999e+06	0	2.37717e+07	0	0
	Adjust all negative value to 0

## Sheet: Common TF
Liver G6pcp TFs	Liver Pck1p TFs	Common TFs	Liver G6pcp selective TFs	Liver Pck1p selective TFs
AHCTF1	AHCTF1	AHCTF1	DNAJC2	ADNP
ARID1A	ARID1A	ARID1A	DR1	ARID1B
ARID5B	ARID5B	ARID5B	ELK4	BAZ2A
ARNTL	ARNTL	ARNTL	GABPA	BAZ2B
BCL11B	BCL11B	BCL11B	HMGA2	CEBPD
BHLHE40	BHLHE40	BHLHE40	HMGB2	CEBPE
CDC5L	CDC5L	CDC5L	HOXB3	CSDA
CEBPA	CEBPA	CEBPA	NFYB	DLX1
CEBPB	CEBPB	CEBPB	ZBTB45	E2F4
CEBPG	CEBPG	CEBPG	ZFP276	EP400
CEBPZ	CEBPZ	CEBPZ	ZFP746	ESRRG
CLOCK	CLOCK	CLOCK		FOXO1
CREB1	CREB1	CREB1		GATA6
CTCF	CTCF	CTCF		HLF
CUX1	CUX1	CUX1		KLF3
DBP	DBP	DBP		MAZ
DMAP1	DMAP1	DMAP1		NAB1
DRAP1	DRAP1	DRAP1		NFATC3
ELF2	ELF2	ELF2		NFRKB
ERG	ERG	ERG		NR1H2
ESRRA	ESRRA	ESRRA		NR2C1
FOXA1	FOXA1	FOXA1		PBX1
FOXA2	FOXA2	FOXA2		PBX2
FOXK1	FOXK1	FOXK1		SP3
GATA4	GATA4	GATA4		SREBF1
GATAD2A	GATAD2A	GATAD2A		ZFP160
GATAD2B	GATAD2B	GATAD2B		ZFP260
GCFC1	GCFC1	GCFC1		ZFP319
GZF1	GZF1	GZF1		ZFP709
HIC2	HIC2	HIC2		ZFP91
HMBOX1	HMBOX1	HMBOX1
HMG20A	HMG20A	HMG20A
HMGA1	HMGA1	HMGA1
HMGB3	HMGB3	HMGB3
HMGN1	HMGN1	HMGN1
HMGN5	HMGN5	HMGN5
HNF1A	HNF1A	HNF1A
HNF1B	HNF1B	HNF1B
HNF4A	HNF4A	HNF4A
IKZF5	IKZF5	IKZF5
IRF3	IRF3	IRF3
KLF15	KLF15	KLF15
LHX2	LHX2	LHX2
MAFG	MAFG	MAFG
MLX	MLX	MLX
MLXIPL	MLXIPL	MLXIPL
MTA1	MTA1	MTA1
MTA2	MTA2	MTA2
NFATC1	NFATC1	NFATC1
NFIA	NFIA	NFIA
NFIB	NFIB	NFIB
NFIC	NFIC	NFIC
NFIL3	NFIL3	NFIL3
NFIX	NFIX	NFIX
NFYA	NFYA	NFYA
NFYC	NFYC	NFYC
NKX1-2	NKX1-2	NKX1-2
NOC3L	NOC3L	NOC3L
NR1D1	NR1D1	NR1D1
NR1H4	NR1H4	NR1H4
NR1I2	NR1I2	NR1I2
NR1I3	NR1I3	NR1I3
NR2C2	NR2C2	NR2C2
NR2F2	NR2F2	NR2F2
NR2F6	NR2F6	NR2F6
NR3C1	NR3C1	NR3C1
NR5A2	NR5A2	NR5A2
NRF1	NRF1	NRF1
ONECUT1	ONECUT1	ONECUT1
ONECUT2	ONECUT2	ONECUT2
PDS5B	PDS5B	PDS5B
PPARA	PPARA	PPARA
PROX1	PROX1	PROX1
RBPJ	RBPJ	RBPJ
REPIN1	REPIN1	REPIN1
RREB1	RREB1	RREB1
RXRA	RXRA	RXRA
RXRG	RXRG	RXRG
RYBP	RYBP	RYBP
SALL1	SALL1	SALL1
SMARCA5	SMARCA5	SMARCA5
SMARCC1	SMARCC1	SMARCC1
SMARCC2	SMARCC2	SMARCC2
SMARCE1	SMARCE1	SMARCE1
SP1	SP1	SP1
TADA2B	TADA2B	TADA2B
TBP	TBP	TBP
TBX3	TBX3	TBX3
TCF20	TCF20	TCF20
TCF7L2	TCF7L2	TCF7L2
TEAD1	TEAD1	TEAD1
TEAD3	TEAD3	TEAD3
TEF	TEF	TEF
TERF2	TERF2	TERF2
TERF2IP	TERF2IP	TERF2IP
TFAM	TFAM	TFAM
TFAP4	TFAP4	TFAP4
TFE3	TFE3	TFE3
TFEB	TFEB	TFEB
TOX4	TOX4	TOX4
UBP1	UBP1	UBP1
UBTF	UBTF	UBTF
VEZF1	VEZF1	VEZF1
WIZ	WIZ	WIZ
XBP1	XBP1	XBP1
YBX1	YBX1	YBX1
YY1	YY1	YY1
ZBTB20	ZBTB20	ZBTB20
ZBTB43	ZBTB43	ZBTB43
ZBTB44	ZBTB44	ZBTB44
ZBTB7A	ZBTB7A	ZBTB7A
ZFHX3	ZFHX3	ZFHX3
ZFP148	ZFP148	ZFP148
ZFP187	ZFP187	ZFP187
ZFP207	ZFP207	ZFP207
ZFP292	ZFP292	ZFP292
ZFP362	ZFP362	ZFP362
ZFP384	ZFP384	ZFP384
ZFP422	ZFP422	ZFP422
ZFP512	ZFP512	ZFP512
ZFP655	ZFP655	ZFP655
ZFP800	ZFP800	ZFP800
ZFX	ZFX	ZFX
ZHX1	ZHX1	ZHX1
ZHX2	ZHX2	ZHX2
ZHX3	ZHX3	ZHX3
ZKSCAN3	ZKSCAN3	ZKSCAN3
ZNF512B	ZNF512B	ZNF512B
DNAJC2	ADNP
DR1	ARID1B
ELK4	BAZ2A	128	11	30
GABPA	BAZ2B
HMGA2	CEBPD
HMGB2	CEBPE
HOXB3	CSDA
NFYB	DLX1
ZBTB45	E2F4
ZFP276	EP400
ZFP746	ESRRG
	FOXO1
	GATA6
	HLF
	KLF3
	MAZ
	NAB1
	NFATC3
	NFRKB
	NR1H2
	NR2C1
	PBX1
	PBX2
	SP3
	SREBF1
	ZFP160
	ZFP260
	ZFP319
	ZFP709
	ZFP91

## Sheet: Refeed regulated TFs
Pck1p enriched TFs	G6pcp enriched TFs	Common Refed- enriched TF on both promoter	Pck1p selective refed- enriched TFs	G6pcp selective refed- enriched TFs		Pck1p depleted TFs	G6pcp depleted TFs	Common refed-depleted TF on both promoter	Pck1p selective refed-depleted TFs	G6pcp selective refed- depleted TFs		Other Pck1p TFs	Other G6pcp TFs	Common other TF on both promoter	Pck1p selective other TFs	G6pcp selective other TFs				Refed enriched TFs	Refed depleted TFs	Other TFs
AHCTF1	AHCTF1	AHCTF1	ADNP	ARID1A		BCL11B	BCL11B	BCL11B	BAZ2A	CTCF		CDC5L	CDC5L	CDC5L	ARID1A	DMAP1			G6pcp	95	15	29
ARID5B	ARID5B	ARID5B	BAZ2B	DNAJC2		CEBPZ	CEBPZ	CEBPZ	DLX1	HMGN5		CEBPB	CEBPB	CEBPB	ARID1B	GZF1			Pck1p	92	23	43
ARNTL	ARNTL	ARNTL	CEBPE	DR1		NOC3L	NOC3L	NOC3L	EP400	NKX1-2		GCFC1	GCFC1	GCFC1	CEBPD	HMGB3			Common	63	8	18	70.7865	8.98876	20.2247
BHLHE40	BHLHE40	BHLHE40	CSDA	ELK4		NR1I2	NR1I2	NR1I2	GATAD2A	SMARCC1		HIC2	HIC2	HIC2	ERG	IKZF5			G6pcp selective	32	7	11
CEBPA	CEBPA	CEBPA	CTCF	ERG		NR3C1	NR3C1	NR3C1	GATAD2B	YY1		HMGN1	HMGN1	HMGN1	HMGA1	KLF15			Pck1p selective	29	15	25
CEBPG	CEBPG	CEBPG	DMAP1	GABPA		ZFP422	ZFP422	ZFP422	KLF3	ZBTB7A		IRF3	IRF3	IRF3	MTA1	MLX
CLOCK	CLOCK	CLOCK	E2F4	GATAD2A		ZFP512	ZFP512	ZFP512	NFATC3	ZFP276		NR1I3	NR1I3	NR1I3	MTA2	PPARA				Refed enriched TFs	Refed depleted TFs	Other TFs
CREB1	CREB1	CREB1	ESRRG	GATAD2B		ZFP800	ZFP800	ZFP800	NR1H2			REPIN1	REPIN1	REPIN1	NFATC1	SMARCA5			G6pcp	68.3453	10.7914	20.8633
CUX1	CUX1	CUX1	FOXO1	HMGA1		BAZ2A	CTCF		PPARA			RXRA	RXRA	RXRA	NFIL3	TERF2			Pck1p	58.2278	14.557	27.2152
DBP	DBP	DBP	GATA6	HMGA2		DLX1	HMGN5		SMARCA5			SMARCC2	SMARCC2	SMARCC2	NFRKB	ZFP187			Common	70.7865	8.98876	20.2247
DRAP1	DRAP1	DRAP1	GZF1	HMGB2		EP400	NKX1-2		SP3			SMARCE1	SMARCE1	SMARCE1	NRF1	ZFX			G6pcp selective	23.0216	5.03597	7.91367
ELF2	ELF2	ELF2	HLF	HOXB3		GATAD2A	SMARCC1		TERF2			TERF2IP	TERF2IP	TERF2IP	PDS5B				Pck1p selective	18.3544	9.49367	15.8228
ESRRA	ESRRA	ESRRA	HMGB3	MTA1		GATAD2B	YY1		ZBTB43			TFAM	TFAM	TFAM	RBPJ
FOXA1	FOXA1	FOXA1	HMGN5	MTA2		KLF3	ZBTB7A		ZFP160			UBP1	UBP1	UBP1	SALL1					39.8734	5.06329	11.3924
FOXA2	FOXA2	FOXA2	IKZF5	NFATC1		NFATC3	ZFP276		ZFP709			UBTF	UBTF	UBTF	SMARCC1
FOXK1	FOXK1	FOXK1	KLF15	NFIL3		NR1H2						YBX1	YBX1	YBX1	SP1
GATA4	GATA4	GATA4	MAZ	NFYB		PPARA		8	15	7		ZFP655	ZFP655	ZFP655	TCF20
HMBOX1	HMBOX1	HMBOX1	MLX	NRF1		SMARCA5						ZNF512B	ZNF512B	ZNF512B	TEAD3
HMG20A	HMG20A	HMG20A	NAB1	PDS5B		SP3						ARID1A	DMAP1		TEF
HNF1A	HNF1A	HNF1A	NKX1-2	RBPJ		TERF2						ARID1B	GZF1		TOX4
HNF1B	HNF1B	HNF1B	NR2C1	SALL1		ZBTB43						CEBPD	HMGB3		YY1
HNF4A	HNF4A	HNF4A	PBX1	SP1		ZFP160						ERG	IKZF5		ZFP207
LHX2	LHX2	LHX2	PBX2	TCF20		ZFP709						HMGA1	KLF15		ZFP260
MAFG	MAFG	MAFG	SREBF1	TEAD3								MTA1	MLX		ZFP362
MLXIPL	MLXIPL	MLXIPL	ZBTB7A	TEF								MTA2	PPARA		ZKSCAN3
NFIA	NFIA	NFIA	ZFP187	TOX4								NFATC1	SMARCA5
NFIB	NFIB	NFIB	ZFP319	ZBTB43								NFIL3	TERF2
NFIC	NFIC	NFIC	ZFP91	ZBTB45								NFRKB	ZFP187
NFIX	NFIX	NFIX	ZFX	ZFP207								NRF1	ZFX	18	25	11
NFYA	NFYA	NFYA		ZFP362								PDS5B
NFYC	NFYC	NFYC		ZFP746								RBPJ
NR1D1	NR1D1	NR1D1		ZKSCAN3								SALL1
NR1H4	NR1H4	NR1H4										SMARCC1
NR2C2	NR2C2	NR2C2										SP1
NR2F2	NR2F2	NR2F2										TCF20
NR2F6	NR2F6	NR2F6										TEAD3
NR5A2	NR5A2	NR5A2										TEF
ONECUT1	ONECUT1	ONECUT1										TOX4
ONECUT2	ONECUT2	ONECUT2										YY1
PROX1	PROX1	PROX1										ZFP207
RREB1	RREB1	RREB1										ZFP260
RXRG	RXRG	RXRG										ZFP362
RYBP	RYBP	RYBP										ZKSCAN3
TADA2B	TADA2B	TADA2B
TBP	TBP	TBP
TBX3	TBX3	TBX3
TCF7L2	TCF7L2	TCF7L2
TEAD1	TEAD1	TEAD1
TFAP4	TFAP4	TFAP4
TFE3	TFE3	TFE3
TFEB	TFEB	TFEB
VEZF1	VEZF1	VEZF1
WIZ	WIZ	WIZ
XBP1	XBP1	XBP1
ZBTB20	ZBTB20	ZBTB20
ZBTB44	ZBTB44	ZBTB44
ZFHX3	ZFHX3	ZFHX3
ZFP148	ZFP148	ZFP148
ZFP292	ZFP292	ZFP292
ZFP384	ZFP384	ZFP384
ZHX1	ZHX1	ZHX1
ZHX2	ZHX2	ZHX2
ZHX3	ZHX3	ZHX3
ADNP	ARID1A
BAZ2B	DNAJC2	63	29	32
CEBPE	DR1
CSDA	ELK4
CTCF	ERG
DMAP1	GABPA
E2F4	GATAD2A
ESRRG	GATAD2B
FOXO1	HMGA1
GATA6	HMGA2
GZF1	HMGB2
HLF	HOXB3
HMGB3	MTA1
HMGN5	MTA2
IKZF5	NFATC1
KLF15	NFIL3
MAZ	NFYB
MLX	NRF1
NAB1	PDS5B
NKX1-2	RBPJ
NR2C1	SALL1
PBX1	SP1
PBX2	TCF20
SREBF1	TEAD3
ZBTB7A	TEF
ZFP187	TOX4
ZFP319	ZBTB43
ZFP91	ZBTB45
ZFX	ZFP207
	ZFP362
	ZFP746
	ZKSCAN3

## Sheet: Functional annotation
Common TFs									Liver G6pcp selective TFs									Liver Pck1p selective TFs											Common refeed enriched TF on both promoter		pathway name	set size	candidates	p-value	q-value	pathway source			Pck1p selective enriched TFs									G6pcp selective enriched TFs
AHCTF1		pathway name	set size	candidates contained	p-value	q-value	pathway source		DNAJC2		pathway name	set size	candidates contained	p-value	q-value	pathway source		ADNP		pathway name	set size	candidates	p-value	q-value	pathway source				AHCTF1				contained						ADNP		pathway name	set size	candidates	p-value	q-value	pathway source		ARID1A
ARID1A									DR1									ARID1B				contained							ARID5B		Nuclear Receptor transcription pathway	51	8 (15.7%)	1.62e-11	9.38e-10	Reactome			BAZ2B				contained					DNAJC2
ARID5B		Maturity onset diabetes of the young - Homo sapiens (human)	26	6 (23.1%)	2.64e-08	6.87e-07	KEGG		ELK4		Mesodermal Commitment Pathway	153	2 (1.3%)	0.00375	0.0136	Wikipathways		BAZ2A		White fat cell differentiation	32	3 (9.4%)	1.32e-05	0.000217	Wikipathways				ARNTL		Maturity onset diabetes of the young - Homo sapiens (human)	26	6 (23.1%)	5.47e-10	1.59e-08	KEGG			CEBPE		Insulin resistance - Homo sapiens (human)	107	3 (2.8%)	0.000236	0.00353	KEGG		DR1
ARNTL		Circadian rhythm - Homo sapiens (human)	31	5 (16.7%)	2.3e-06	3.22e-05	KEGG		GABPA		Transcriptional misregulation in cancer - Homo sapiens (human)	186	2 (1.1%)	0.00543	0.0136	KEGG		BAZ2B		White fat cell differentiation	32	3 (9.4%)	1.32e-05	0.000217	Wikipathways				BHLHE40		Circadian rhythm - Homo sapiens (human)	31	5 (16.7%)	9.54e-08	1.84e-06	KEGG			CSDA		Transcriptional regulation of pluripotent stem cells	28	2 (7.1%)	0.000471	0.00353	Reactome		ELK4
BCL11B		Transcriptional misregulation in cancer - Homo sapiens (human)	186	8 (4.3%)	6.07e-05	0.000553	KEGG		HMGA2									CEBPD		Adipogenesis	131	4 (3.1%)	3.53e-05	0.000388	Wikipathways				CEBPA		BMAL1:CLOCK,NPAS2 activates circadian gene expression	13	4 (30.8%)	1.4e-07	2.04e-06	Reactome			CTCF		Circadian Clock	35	2 (5.7%)	0.000738	0.00369	Reactome		ERG
BHLHE40		Non-alcoholic fatty liver disease (NAFLD) - Homo sapiens (human)	149	6 (4.0%)	0.000767	0.00517	KEGG		HMGB2									CEBPE		Nuclear Receptor transcription pathway	51	3 (5.9%)	5.43e-05	0.000448	Reactome				CEBPG		Circadian Clock	35	5 (14.3%)	2.14e-07	2.48e-06	Reactome			DMAP1		Transcriptional misregulation in cancer - Homo sapiens (human)	186	3 (1.6%)	0.00117	0.00439	KEGG		GABPA
CDC5L		Thyroid cancer - Homo sapiens (human)	37	3 (8.1%)	0.00245	0.0114	KEGG		HOXB3									CSDA		Transcriptional misregulation in cancer - Homo sapiens (human)	186	4 (2.2%)	0.000135	0.000877	KEGG				CLOCK		RNA Polymerase III Abortive And Retractive Initiation	42	5 (12.2%)	4.86e-07	4.03e-06	Reactome			E2F4		Nuclear Receptor transcription pathway	51	2 (3.9%)	0.00156	0.00469	Reactome		GATAD2A
CEBPA		Hepatocellular carcinoma - Homo sapiens (human)	168	5 (3.0%)	0.0077	0.0257	KEGG		NFYB									DLX1		Transcriptional cascade regulating adipogenesis	13	2 (15.4%)	0.000159	0.000877	Wikipathways				CREB1		RNA Polymerase III Transcription	42	5 (12.2%)	4.86e-07	4.03e-06	Reactome			ESRRG		AMPK signaling pathway - Homo sapiens (human)	121	2 (1.7%)	0.00836	0.0209	KEGG		GATAD2B
CEBPB		Insulin resistance - Homo sapiens (human)	107	4 (3.7%)	0.00776	0.0257	KEGG		ZBTB45									E2F4		Transcription factor regulation in adipogenesis	22	2 (9.1%)	0.000469	0.00203	Wikipathways				CUX1		RNA Polymerase III Transcription Termination	24	4 (17.4%)	1.69e-06	1.22e-05	Reactome			FOXO1									HMGA1
CEBPG		Tuberculosis - Homo sapiens (human)	179	5 (2.8%)	0.00975	0.0306	KEGG		ZFP276									EP400		Insulin resistance - Homo sapiens (human)	107	3 (2.8%)	0.000491	0.00203	KEGG				DBP		Gene expression (Transcription)	1372	17 (1.2%)	7.8e-06	5.03e-05	Reactome			GATA6									HMGA2
CEBPZ		Nuclear Receptor transcription pathway	51	13 (25.5%)	2.7e-17	4.91e-15	Reactome		ZFP746		gene ontology term	category,	set size	candidates	p-value	q-value		ESRRG		Steatosis AOP	26	2 (7.7%)	0.000657	0.00241	Wikipathways				DRAP1		Generic Transcription Pathway	1106	13 (1.2%)	0.000211	0.00122	Reactome			GZF1									HMGB2
CLOCK		Gene expression (Transcription)	1372	38 (2.8%)	4.27e-14	3.88e-12	Reactome					level		contained				FOXO1		Transcriptional regulation of pluripotent stem cells	28	2 (7.1%)	0.000763	0.00252	Reactome				ELF2		RNA Polymerase II Transcription	1235	13 (1.1%)	0.000622	0.00328	Reactome			HLF		gene ontology term	category,	set size	candidates	p-value	q-value		HOXB3
CREB1		Generic Transcription Pathway	1106	30 (2.7%)	8.89e-11	5.39e-09	Reactome				GO:0003700 DNA binding transcription factor activity	MF 2	1568	8 (0.5%)	1.51e-08	9.08e-08		GATA6		Sudden Infant Death Syndrome (SIDS) Susceptibility Pathways	159	3 (1.9%)	0.00155	0.00434	Wikipathways				ESRRA		Signaling pathways regulating pluripotency of stem cells - Homo sapiens (human)	139	4 (2.9%)	0.00204	0.00986	KEGG			HMGB3			level		contained				MTA1
CTCF		BMAL1:CLOCK,NPAS2 activates circadian gene expression	13	6 (46.2%)	2.12e-10	9.67e-09	Reactome				GO:0003682 chromatin binding	MF 2	544	5 (0.9%)	2.05e-06	6.15e-06		HLF		Cellular senescence - Homo sapiens (human)	160	3 (1.9%)	0.00158	0.00434	KEGG				FOXA1		Antigen processing and presentation - Homo sapiens (human)	77	3 (3.9%)	0.0033	0.0147	KEGG			HMGN5		GO:0003700 DNA binding transcription factor activity	MF 2	1568	19 (1.2%)	6.14e-16	5.53e-15		MTA2
CUX1		RNA Polymerase II Transcription	1235	30 (2.4%)	1.32e-09	4.81e-08	Reactome				GO:1901363 heterocyclic compound binding	MF 2	6038	9 (0.1%)	2.87e-05	4.89e-05		KLF3											FOXA2		Activation of gene expression by SREBF (SREBP)	26	2 (7.7%)	0.00453	0.0188	Reactome			IKZF5		GO:0009058 biosynthetic process	BP 2	6596	25 (0.4%)	3.85e-11	1.77e-09		NFATC1
DBP		Circadian Clock	35	7 (20.0%)	5.03e-09	1.52e-07	Reactome				GO:0097159 organic cyclic compound binding	MF 2	6124	9 (0.1%)	3.26e-05	4.89e-05		MAZ											FOXK1		Tuberculosis - Homo sapiens (human)	179	4 (2.2%)	0.00496	0.0192	KEGG			KLF15		GO:1901363 heterocyclic compound binding	MF 2	6038	24 (0.4%)	1.2e-10	5.02e-10		NFIL3
DMAP1		Chromatin modifying enzymes	270	12 (4.4%)	5.89e-07	9.74e-06	Reactome				GO:0009058 biosynthetic process	BP 2	6596	9 (0.1%)	6.41e-05	0.00167		NAB1											GATA4		Regulation of cholesterol biosynthesis by SREBP (SREBF)	31	2 (6.5%)	0.0064	0.0232	Reactome			MAZ		GO:0097159 organic cyclic compound binding	MF 2	6124	24 (0.4%)	1.67e-10	5.02e-10		NFYB
DRAP1		Chromatin organization	270	12 (4.4%)	5.89e-07	9.74e-06	Reactome				GO:0000988 transcription factor activity, protein binding	MF 2	655	4 (0.6%)	0.000146	0.000175		NFATC3											HMBOX1		Thyroid cancer - Homo sapiens (human)	37	2 (5.4%)	0.00903	0.0308	KEGG			MLX		GO:0003682 chromatin binding	MF 2	544	9 (1.7%)	2.23e-08	5.01e-08		NRF1
ELF2		RNA Polymerase I Transcription Initiation	48	6 (12.5%)	1.24e-06	1.88e-05	Reactome				GO:0072089 stem cell proliferation	BP 2	107	2 (1.9%)	0.00108	0.014		NFRKB											HMG20A										NAB1		GO:0006807 nitrogen compound metabolic process	BP 2	10333	26 (0.3%)	8.9e-08	2.05e-06		PDS5B
ERG		RUNX1 interacts with co-factors whose precise effect on RUNX1 targets is not known	40	5 (12.8%)	8.83e-06	0.000115	Reactome				GO:0043233 organelle lumen	CC 2	5241	7 (0.1%)	0.00229	0.0149		NR1H2											HNF1A										NKX1-2		GO:0044238 primary metabolic process	BP 2	10852	26 (0.2%)	3.19e-07	3.94e-06		RBPJ
ESRRA		RNA Polymerase III Abortive And Retractive Initiation	42	5 (12.2%)	1.14e-05	0.000129	Reactome				GO:0006807 nitrogen compound metabolic process	BP 2	10333	9 (0.1%)	0.00364	0.0281		NR2C1		gene ontology term	category,	set size	candidates	p-value	q-value				HNF1B										NR2C1		GO:0044237 cellular metabolic process	BP 2	10884	26 (0.2%)	3.43e-07	3.94e-06		SALL1
FOXA1		RNA Polymerase III Transcription	42	5 (12.2%)	1.14e-05	0.000129	Reactome				GO:0032993 protein-DNA complex	CC 2	202	2 (1.0%)	0.00374	0.0149		PBX1			level		contained						HNF4A		gene ontology term	category,	set size	candidates	p-value	q-value			PBX1		GO:0071704 organic substance metabolic process	BP 2	11202	26 (0.2%)	7.27e-07	6.69e-06		SP1
FOXA2		RNA Polymerase III Transcription Termination	24	4 (17.4%)	2.12e-05	0.000215	Reactome				GO:0044238 primary metabolic process	BP 2	10852	9 (0.1%)	0.00566	0.0281		PBX2		GO:0003700 DNA binding transcription factor activity	MF 2	1568	18 (1.2%)	5.61e-15	5.61e-14				LHX2			level		contained					PBX2		GO:0050789 regulation of biological process	BP 2	11645	26 (0.2%)	2.01e-06	1.54e-05		TCF20
FOXK1		ChREBP activates metabolic gene expression	2	2 (100.0%)	5.28e-05	0.000505	Reactome				GO:0044237 cellular metabolic process	BP 2	10884	9 (0.1%)	0.0058	0.0281		SP3		GO:1901363 heterocyclic compound binding	MF 2	6038	24 (0.4%)	1.32e-11	6.17e-11				MAFG		GO:0003700 DNA binding transcription factor activity	MF 2	1568	56 (3.6%)	1.01e-56	1.31e-55			SREBF1		GO:0043227 membrane-bounded organelle	CC 2	12746	26 (0.2%)	2.11e-05	0.000121		TEAD3
GATA4		Epigenetic regulation of gene expression	151	7 (4.7%)	0.000111	0.000965	Reactome				GO:0071704 organic substance metabolic process	BP 2	11202	9 (0.1%)	0.00752	0.0281		SREBF1		GO:0097159 organic cyclic compound binding	MF 2	6124	24 (0.4%)	1.85e-11	6.17e-11				MLXIPL		GO:1901363 heterocyclic compound binding	MF 2	6038	60 (1.0%)	4.38e-31	2.85e-30			ZBTB7A		GO:0043229 intracellular organelle	CC 2	12763	26 (0.2%)	2.19e-05	0.000121		TEF
GATAD2A		Positive epigenetic regulation of rRNA expression	109	6 (5.6%)	0.000136	0.00112	Reactome				GO:0002520 immune system development	BP 2	931	3 (0.3%)	0.00758	0.0281		ZFP160		GO:0003682 chromatin binding	MF 2	544	10 (1.8%)	6.8e-10	1.7e-09				NFIA		GO:0097159 organic cyclic compound binding	MF 2	6124	60 (1.0%)	1.03e-30	4.47e-30			ZFP187		GO:0043500 muscle adaptation	BP 2	88	3 (3.4%)	0.000224	0.00147		TOX4
GATAD2B		RNA Polymerase I Promoter Clearance	112	6 (5.4%)	0.000158	0.00125	Reactome											ZFP260		GO:0009058 biosynthetic process	BP 2	6596	23 (0.3%)	2.57e-09	1.26e-07				NFIB		GO:0009058 biosynthetic process	BP 2	6596	60 (0.9%)	9.48e-29	7.68e-27			ZFP319		GO:0007275 multicellular organism development	BP 2	5261	16 (0.3%)	0.000263	0.00151		ZBTB43
GCFC1		RNA Polymerase I Transcription	114	6 (5.3%)	0.000174	0.00132	Reactome											ZFP319		GO:0006807 nitrogen compound metabolic process	BP 2	10333	25 (0.2%)	1.66e-07	4.07e-06				NFIC		GO:0000988 transcription factor activity, protein binding	MF 2	655	23 (3.5%)	8.43e-19	2.74e-18			ZFP91		GO:0044424 intracellular part	CC 2	14559	26 (0.2%)	0.000669	0.00245		ZBTB45
GZF1		Transcriptional regulation by RUNX3	52	4 (7.8%)	0.000513	0.00364	Reactome											ZFP709		GO:0044238 primary metabolic process	BP 2	10852	25 (0.2%)	5.67e-07	7.44e-06				NFIX		GO:0043233 organelle lumen	CC 2	5241	48 (0.9%)	2.1e-17	3.56e-16			ZFX		GO:0048856 anatomical structure development	BP 2	5749	16 (0.3%)	0.000794	0.00406		ZFP207
HIC2		Activation of gene expression by SREBF (SREBP)	26	3 (11.5%)	0.000868	0.00564	Reactome											ZFP91		GO:0044237 cellular metabolic process	BP 2	10884	25 (0.2%)	6.08e-07	7.44e-06				NFYA		GO:0006807 nitrogen compound metabolic process	BP 2	10333	60 (0.6%)	5.12e-17	2.08e-15					GO:0005622 intracellular	CC 2	14838	26 (0.2%)	0.0011	0.00254		ZFP362
HMBOX1		Transcriptional activation of mitochondrial biogenesis	27	3 (11.1%)	0.000972	0.0061	Reactome													GO:0071704 organic substance metabolic process	BP 2	11202	25 (0.2%)	1.25e-06	1.23e-05				NFYC		GO:0044238 primary metabolic process	BP 2	10852	60 (0.6%)	9.77e-16	2.34e-14					GO:0005667 transcription factor complex	CC 2	349	4 (1.1%)	0.00115	0.00254		ZFP746
HMG20A		Regulation of PTEN gene transcription	62	4 (6.5%)	0.00108	0.00635	Reactome													GO:0043233 organelle lumen	CC 2	5241	18 (0.3%)	3.89e-06	3.13e-05				NR1D1		GO:0044237 cellular metabolic process	BP 2	10884	60 (0.6%)	1.15e-15	2.34e-14					GO:0000988 transcription factor activity, protein binding	MF 2	655	5 (0.8%)	0.00163	0.00294		ZKSCAN3
HMGA1		RUNX3 regulates YAP1-mediated transcription	7	2 (28.6%)	0.00108	0.00635	Reactome													GO:0005667 transcription factor complex	CC 2	349	6 (1.7%)	4.48e-06	3.13e-05				NR1H4		GO:0071704 organic substance metabolic process	BP 2	11202	60 (0.5%)	6.57e-15	1.06e-13					GO:0004879 nuclear receptor activity	MF 2	49	2 (4.1%)	0.00199	0.00299
HMGB3		Regulation of TP53 Activity through Acetylation	30	3 (10.0%)	0.00133	0.00755	Reactome													GO:0043227 membrane-bounded organelle	CC 2	12746	25 (0.2%)	3.2e-05	0.000116				NR2C2		GO:0005667 transcription factor complex	CC 2	349	16 (4.6%)	6.92e-15	5.88e-14					GO:0043233 organelle lumen	CC 2	5241	14 (0.3%)	0.00358	0.00656
HMGN1		Regulation of cholesterol biosynthesis by SREBP (SREBF)	31	3 (9.7%)	0.00146	0.0076	Reactome													GO:0043229 intracellular organelle	CC 2	12763	25 (0.2%)	3.32e-05	0.000116				NR2F2		GO:0050789 regulation of biological process	BP 2	11645	60 (0.5%)	6.87e-14	9.27e-13					GO:0048869 cellular developmental process	BP 2	4298	12 (0.3%)	0.00604	0.0278
HMGN5		YAP1- and WWTR1 (TAZ)-stimulated gene expression	9	2 (22.2%)	0.00184	0.00929	Reactome													GO:0004879 nuclear receptor activity	MF 2	49	3 (6.1%)	3.45e-05	6.89e-05				NR2F6		GO:0004879 nuclear receptor activity	MF 2	49	8 (16.3%)	2.27e-12	5.91e-12
HNF1A		RMTs methylate histone arginines	74	4 (5.4%)	0.00208	0.0102	Reactome													GO:0050789 regulation of biological process	BP 2	11645	24 (0.2%)	5.79e-05	0.000473				NR5A2		GO:0007275 multicellular organism development	BP 2	5261	42 (0.8%)	6.83e-12	7.9e-11
HNF1B		Metabolism of steroids	127	5 (3.9%)	0.00235	0.0113	Reactome													GO:0009719 response to endogenous stimulus	BP 2	1596	9 (0.6%)	0.000109	0.000761				ONECUT1		GO:0043227 membrane-bounded organelle	CC 2	12746	60 (0.5%)	1.59e-11	7.34e-11
HNF4A		ERCC6 (CSB) and EHMT2 (G9a) positively regulate rRNA expression	79	4 (5.1%)	0.00252	0.0115	Reactome													GO:0005515 protein binding	MF 2	11696	23 (0.2%)	0.000535	0.000891				ONECUT2		GO:0043229 intracellular organelle	CC 2	12763	60 (0.5%)	1.73e-11	7.34e-11
IKZF5		Signaling by Nuclear Receptors	195	6 (3.1%)	0.00287	0.0127	Reactome													GO:0007275 multicellular organism development	BP 2	5261	15 (0.3%)	0.000604	0.0037				PROX1		GO:0048856 anatomical structure development	BP 2	5749	43 (0.7%)	2.73e-11	2.76e-10
IRF3		Transcriptional regulation by RUNX1	198	6 (3.1%)	0.0031	0.0134	Reactome													GO:0044424 intracellular part	CC 2	14559	25 (0.2%)	0.000886	0.00248				RREB1		GO:0048869 cellular developmental process	BP 2	4298	37 (0.9%)	6.16e-11	5.55e-10
KLF15		NOTCH2 intracellular domain regulates transcription	12	2 (16.7%)	0.00332	0.0141	Reactome													GO:0048869 cellular developmental process	BP 2	4298	13 (0.3%)	0.00111	0.00604				RXRG		GO:0007623 circadian rhythm	BP 2	198	10 (5.1%)	4.93e-10	4e-09
LHX2		HDACs deacetylate histones	94	4 (4.3%)	0.00493	0.0195	Reactome													GO:0005622 intracellular	CC 2	14838	25 (0.2%)	0.00143	0.00333				RYBP		GO:0032922 circadian regulation of gene expression	BP 2	56	6 (10.9%)	1.85e-08	1.36e-07
MAFG		Synthesis of bile acids and bile salts via 27-hydroxycholesterol	15	2 (13.3%)	0.00521	0.0201	Reactome													GO:0048856 anatomical structure development	BP 2	5749	15 (0.3%)	0.00167	0.00818				TADA2B		GO:0044424 intracellular part	CC 2	14559	60 (0.4%)	4.63e-08	1.58e-07
MLX		PTEN Regulation	96	4 (4.2%)	0.00531	0.0201	Reactome													GO:0051716 cellular response to stimulus	BP 2	7567	17 (0.2%)	0.00343	0.0146				TBP		GO:0005622 intracellular	CC 2	14838	60 (0.4%)	1.46e-07	4.13e-07
MLXIPL		Recycling of bile acids and salts	16	2 (12.5%)	0.00592	0.0216	Reactome													GO:0009653 anatomical structure morphogenesis	BP 2	2564	9 (0.4%)	0.00358	0.0146				TBX3		GO:0009719 response to endogenous stimulus	BP 2	1596	19 (1.2%)	1.92e-07	1.29e-06
MTA1		Mitochondrial biogenesis	53	3 (5.7%)	0.00679	0.0238	Reactome													GO:0017053 transcriptional repressor complex	CC 2	85	2 (2.4%)	0.00543	0.0109				TCF7L2		GO:0044446 intracellular organelle part	CC 2	9172	48 (0.5%)	2.47e-07	6e-07
MTA2		Regulation of lipid metabolism by Peroxisome proliferator-activated receptor alpha (PPARalpha)	20	2 (10.0%)	0.0092	0.0294	Reactome													GO:0043500 muscle adaptation	BP 2	88	2 (2.3%)	0.00581	0.0219				TEAD1		GO:0009653 anatomical structure morphogenesis	BP 2	2564	23 (0.9%)	1.08e-06	6.75e-06
NFATC1		the information processing pathway at the ifn beta enhancer	29	6 (20.7%)	5.35e-08	1.22e-06	BioCarta													GO:0042221 response to chemical	BP 2	4644	12 (0.3%)	0.00791	0.0277				TFAP4		GO:0050673 epithelial cell proliferation	BP 2	372	7 (1.9%)	0.000154	0.000891
NFIA		chromatin remodeling by hswi/snf atp-dependent complexes	16	5 (31.2%)	7.65e-08	1.55e-06	BioCarta													GO:0000988 transcription factor activity, protein binding	MF 2	655	4 (0.6%)	0.00952	0.0136				TFE3		GO:0003682 chromatin binding	MF 2	544	8 (1.5%)	0.000275	0.000596
NFIB		overview of telomerase rna component gene hterc transcriptional regulation	7	3 (42.9%)	1.29e-05	0.000138	BioCarta																						TFEB		GO:0042221 response to chemical	BP 2	4644	27 (0.6%)	0.000314	0.00169
NFIC		basic mechanism of action of ppara pparb(d) and pparg and effects on gene expression	5	2 (40.0%)	0.00052	0.00364	BioCarta																						VEZF1		GO:0007389 pattern specification process	BP 2	426	7 (1.6%)	0.000352	0.00178
NFIL3		visceral fat deposits and the metabolic syndrome	8	2 (25.0%)	0.00144	0.0076	BioCarta																						WIZ		GO:0005515 protein binding	MF 2	11696	49 (0.4%)	0.000403	0.000748
NFIX		p38 mapk signaling pathway	31	3 (9.7%)	0.00146	0.0076	BioCarta																						XBP1		GO:0051775 response to redox state	BP 2	12	2 (16.7%)	0.00062	0.00296
NFYA		effects of calcineurin in keratinocyte differentiation	13	2 (15.4%)	0.00391	0.0162	BioCarta																						ZBTB20		GO:0003006 developmental process involved in reproduction	BP 2	669	8 (1.2%)	0.00107	0.00483
NFYC		transcription regulation by methyltransferase of carm1	14	2 (14.3%)	0.00453	0.0183	BioCarta																						ZBTB44		GO:0048646 anatomical structure formation involved in morphogenesis	BP 2	1039	10 (1.0%)	0.00131	0.00547
NKX1-2		human cytomegalovirus and map kinase pathways	16	2 (12.5%)	0.00592	0.0216	BioCarta																						ZFHX3		GO:0019827 stem cell population maintenance	BP 2	154	4 (2.6%)	0.00137	0.00547
NOC3L		mechanism of gene regulation by peroxisome proliferators via ppara	52	3 (5.8%)	0.00644	0.023	BioCarta																						ZFP148		GO:0098727 maintenance of cell number	BP 2	156	4 (2.6%)	0.00143	0.00547
NR1D1		oxidative stress induced gene expression via nrf2	18	2 (11.1%)	0.00748	0.0257	BioCarta																						ZFP292		GO:0065008 regulation of biological quality	BP 2	3761	22 (0.6%)	0.00149	0.00547
NR1H4		mapkinase signaling pathway	57	3 (5.3%)	0.0083	0.027	BioCarta																						ZFP384		GO:0016043 cellular component organization	BP 2	6340	31 (0.5%)	0.00202	0.00712
NR1I2																													ZHX1		GO:0001763 morphogenesis of a branching structure	BP 2	198	4 (2.0%)	0.0034	0.0115
NR1I3																													ZHX2		GO:0032993 protein-DNA complex	CC 2	202	4 (2.0%)	0.00359	0.00763
NR2C2																													ZHX3		GO:0007049 cell cycle	BP 2	1882	13 (0.7%)	0.0045	0.0146
NR2F2		Gene ontology term	category	set size	candidates contained	p-value	q-value																								GO:0007267 cell-cell signaling	BP 2	1663	12 (0.7%)	0.00469	0.0146
NR2F6																													63		GO:0042303 molting cycle	BP 2	113	3 (2.7%)	0.00518	0.015			29									32
NR3C1		GO:0003700 DNA binding transcription factor activity	MF 2	1568	98 (6.3%)	4.37e-88	8.3e-87																								GO:0032940 secretion by cell	BP 2	1469	11 (0.8%)	0.00519	0.015
NR5A2		GO:1901363 heterocyclic compound binding	MF 2	6038	116 (1.9%)	1.13e-57	1.07e-56																								GO:0002520 immune system development	BP 2	931	8 (0.9%)	0.00793	0.0222
NRF1		GO:0097159 organic cyclic compound binding	MF 2	6124	116 (1.9%)	5.93e-57	3.75e-56																								GO:0021700 developmental maturation	BP 2	256	4 (1.6%)	0.00837	0.0226
ONECUT1		GO:0009058 biosynthetic process	BP 2	6596	116 (1.8%)	3.71e-53	3.53e-51																								GO:0048589 developmental growth	BP 2	584	6 (1.0%)	0.0095	0.0251
ONECUT2		GO:0000988 transcription factor activity, protein binding	MF 2	655	44 (6.7%)	2.03e-34	9.62e-34
PDS5B		GO:0006807 nitrogen compound metabolic process	BP 2	10333	117 (1.1%)	1.47e-32	6.99e-31
PPARA		GO:0043233 organelle lumen	CC 2	5241	91 (1.7%)	4.42e-30	9.28e-29
PROX1		GO:0044238 primary metabolic process	BP 2	10852	117 (1.1%)	4.69e-30	1.49e-28
RBPJ		GO:0044237 cellular metabolic process	BP 2	10884	117 (1.1%)	6.5e-30	1.54e-28
REPIN1		GO:0071704 organic substance metabolic process	BP 2	11202	117 (1.0%)	1.95e-28	3.7e-27
RREB1		GO:0050789 regulation of biological process	BP 2	11645	116 (1.0%)	1.5e-24	2.38e-23
RXRA		GO:0003682 chromatin binding	MF 2	544	32 (5.9%)	6.78e-23	2.58e-22
RXRG		GO:0005667 transcription factor complex	CC 2	349	27 (7.8%)	1.89e-22	1.99e-21
RYBP		GO:0043227 membrane-bounded organelle	CC 2	12746	117 (0.9%)	7.97e-22	4.94e-21
SALL1		GO:0043229 intracellular organelle	CC 2	12763	117 (0.9%)	9.41e-22	4.94e-21
SMARCA5		GO:0004879 nuclear receptor activity	MF 2	49	12 (24.5%)	1.11e-16	3.53e-16
SMARCC1		GO:0044424 intracellular part	CC 2	14559	117 (0.8%)	4.72e-15	1.98e-14
SMARCC2		GO:0005622 intracellular	CC 2	14838	117 (0.8%)	4.42e-14	1.55e-13
SMARCE1		GO:0007275 multicellular organism development	BP 2	5261	69 (1.3%)	6e-13	8.14e-12
SP1		GO:0044446 intracellular organelle part	CC 2	9172	92 (1.0%)	4.99e-12	1.5e-11
TADA2B		GO:0048856 anatomical structure development	BP 2	5749	70 (1.2%)	1.56e-11	1.85e-10
TBP		GO:0048869 cellular developmental process	BP 2	4298	59 (1.4%)	2.29e-11	2.42e-10
TBX3		GO:0017053 transcriptional repressor complex	CC 2	85	10 (11.8%)	1.01e-10	2.66e-10
TCF20		GO:0007623 circadian rhythm	BP 2	198	13 (6.6%)	2.27e-10	2.15e-09
TCF7L2		GO:0032922 circadian regulation of gene expression	BP 2	56	8 (14.5%)	1.42e-09	1.23e-08
TEAD1		GO:0009719 response to endogenous stimulus	BP 2	1596	31 (1.9%)	3.95e-09	3.13e-08
TEAD3		GO:0043228 non-membrane-bounded organelle	CC 2	4194	53 (1.3%)	1.1e-08	2.57e-08
TEF		GO:0005515 protein binding	MF 2	11696	97 (0.8%)	1.59e-07	4.31e-07
TERF2		GO:0009653 anatomical structure morphogenesis	BP 2	2564	37 (1.4%)	2.37e-07	1.73e-06
TERF2IP		GO:0050673 epithelial cell proliferation	BP 2	372	11 (3.0%)	1.72e-05	0.000116
TFAM		GO:0032993 protein-DNA complex	CC 2	202	8 (4.0%)	3.21e-05	6.75e-05
TFAP4		GO:0019827 stem cell population maintenance	BP 2	154	7 (4.5%)	4.4e-05	0.000279
TFE3		GO:0098727 maintenance of cell number	BP 2	156	7 (4.5%)	4.78e-05	0.000284
TFEB		GO:0003006 developmental process involved in reproduction	BP 2	669	14 (2.1%)	5.65e-05	0.000316
TOX4		GO:0016043 cellular component organization	BP 2	6340	59 (0.9%)	6.39e-05	0.000337
UBP1		GO:0048646 anatomical structure formation involved in morphogenesis	BP 2	1039	17 (1.6%)	0.000183	0.000913
UBTF		GO:0001763 morphogenesis of a branching structure	BP 2	198	7 (3.5%)	0.000212	0.00101
VEZF1		GO:0042221 response to chemical	BP 2	4644	45 (1.0%)	0.000377	0.0017
WIZ		GO:0030870 Mre11 complex	CC 2	7	2 (28.6%)	0.000757	0.00144
XBP1		GO:0007389 pattern specification process	BP 2	426	9 (2.1%)	0.00119	0.00515
YBX1		GO:0051775 response to redox state	BP 2	12	2 (16.7%)	0.00233	0.00963
YY1		GO:0051716 cellular response to stimulus	BP 2	7567	61 (0.8%)	0.00314	0.0124
ZBTB20		GO:0001816 cytokine production	BP 2	706	11 (1.6%)	0.00376	0.0143
ZBTB43		GO:0042303 molting cycle	BP 2	113	4 (3.6%)	0.0049	0.0179
ZBTB44		GO:0007568 aging	BP 2	287	6 (2.1%)	0.00815	0.0277
ZBTB7A		GO:0044419 interspecies interaction between organisms	BP 2	893	12 (1.3%)	0.00818	0.0277
ZFHX3		GO:0048589 developmental growth	BP 2	584	9 (1.5%)	0.00943	0.0309
ZFP148
ZFP187
ZFP207
ZFP292
ZFP362
ZFP384
ZFP422
ZFP512
ZFP655
ZFP800
ZFX
ZHX1
ZHX2
ZHX3
ZKSCAN3
ZNF512B
128																		30
[truncated: 27 more columns]
