# Supplementary material for: Identification of Insulin-Responsive Transcription Factors That Regulate Glucose Production by Hepatocytes
Source: Oxford University Press journal article supplement (doi:10.2337/db18-1236), 2019-04-01
Supplement: db181236supplementarydata4.xlsx [file db181236supplementarydata4.xlsx]

## Sheet: Pck1p heatmap table
	V	Dex/cAMP	D/C/I
ZFP384	0	4.83534e+06	1.87774e+06
CSDA	1.43113e+07	0	8.49401e+06
USF1	3.71061e+06	0	2.12591e+06
YBX1	2.51154e+07	0	1.45681e+07
ZHX3	2.66081e+06	0	1.85625e+06
GATA6	0	3.97712e+06	1.4508e+06
ESRRA	5.84671e+06	0	3.87535e+06
DMAP1	0	4.9055e+06	1.72013e+06
TOX4	6.87319e+07	7.13586e+06	4.71147e+07
RUNX1	2.49063e+06	0	1.22304e+06
ZHX2	1.24266e+07	1.13877e+07	1.19054e+07
TCFAP4	1.22569e+07	0	5.01916e+06
NFIL3	1.58303e+07	4.98192e+07	3.83935e+07
NR5A2	8.48497e+06	0	3.12651e+06
GATAD2A	1.96547e+06	2.45819e+07	0
SMARCE1	4.0439e+07	0	4.224e+07
TERF2	958047	1.06059e+07	586376
POU2F1	2.24095e+06	628419	2.15975e+06
ZFP512	0	6.20091e+06	0
ZBTB7A	0	1.93935e+06	0
YY1	0	1.05941e+07	0
YEATS4	0	4.03846e+06	0
XBP1	0	2.05356e+06	0
UBP1	0	3.39866e+07	0
TCFCP2L1	0	1.22608e+06	0
TCFCP2	0	2.19708e+07	0
SP2	0	333889	0
SMAD4	0	598549	0
RYBP	0	3.83203e+06	0
RFX5	0	9.31826e+06	0
RBPJ	0	1.85948e+07	0
NRF1	0	8.97508e+06	0
NR2C2	0	8.21435e+06	0
NR2C1	0	4.63841e+06	0
MRPL28	0	3964915	0
MNT	0	332658	0
MAFF	0	1.08686e+06	0
HMGN5	0	2.69634e+06	0
HMGB3	0	2.87004e+07	0
HMGA1	0	2.17327e+07	0
HIC2	0	1.65576e+06	0
GATAD2B	0	1.78143e+07	0
FOXO1	0	1.24393e+06	0
FOXK2	0	1.73654e+06	0
EN1	0	1.95448e+06	0
ELK4	0	2.2568e+06	0
ELF2	0	2.40231e+06	0
E2F8	0	3.47975e+07	0
DRAP1	0	9.9312e+06	0
BCL6	0	1.12111e+08	0
DNAJC1	0	700593	0
CDC5L	4.48035e+07	8.04144e+06	4.41167e+07
TEAD1	2.76416e+07	0	2.68023e+07
SMARCA5	4.88405e+07	3.91521e+06	4.3588e+07
WIZ	9.30271e+06	0	8.50966e+06
GATA4	2.37219e+07	1.39648e+06	1.90199e+07
TBX3	703005	0	554729
E2F3	5.03254e+06	0	4.24046e+06
RB1	3.77534e+06	0	3.0863e+06
CLOCK	550914	0	1.22136e+06
DNAJC2	1.16069e+06	2.76817e+06	0
SMARCC2	3.60277e+07	1.65541e+06	6.94021e+07
TERF2IP	4.93669e+06	5.61524e+06	4.35664e+06
TFDP1	3.14627e+06	0	5.86271e+06
NFIX	6.56768e+07	3.13499e+07	8.5177e+07
NFIX	6.56768e+07	3.13499e+07	8.5177e+07
PBX2	2.63993e+06	0	3.86139e+06
ATF4	4.28102e+06	0	6.30184e+06
HMG20A	1.04288e+06	0	1.53133e+06
TFAM	2.27914e+07	7.65048e+07	0
ZBTB20	3.75454e+07	6.23297e+06	4.99769e+07
UBTF	3.19192e+07	3.09297e+06	3.72011e+07
HNF4A	5.81784e+06	0	7.4062e+06
NFIC	9.46808e+07	4.98773e+07	1.06804e+08
CEBPA	3.68933e+07	2.04781e+07	4.24515e+07
MITF	2.24346e+07	5.0873e+07	1.31281e+07
ZFP148	8.99612e+06	2.6377e+06	1.10863e+07
ARID1B	3.19291e+06	4.83069e+06	1.27439e+07
SALL1	0	1.6022e+06	5.49265e+06
AHCTF1	1.85655e+07	3.55219e+07	8.83147e+07
NFIA	5.54402e+07	6.10071e+07	7.77576e+07
ZFHX3	2.5665e+06	471557	1.06109e+07
ZFHX4	2.5665e+06	0	9.28442e+06
SMARCC1	7.65483e+06	0	5.24244e+07
ZBTB44	2.01453e+06	2.26036e+06	0
CEBPB	4.05623e+06	3.70916e+07	3.92634e+08
FOXK1	2.37443e+06	2.97876e+06	1.2147e+07
VEZF1	0	2.28222e+06	4.23861e+07
ZNF512B	0	0	3.28329e+06
TCF20	0	0	159321
TADA2B	0	0	1.22995e+06
SP1	0	0	1.11413e+06
RREB1	0	0	906167
RBL2	0	0	1.37754e+06
NFRKB	0	0	6.96822e+06
MIS18BP1	0	0	7.47204e+06
MAZ	0	0	1.19168e+06
KLF3	0	0	981311
KLF13	0	0	777365
HMG20B	0	0	2.20054e+06
GLIS3	0	0	3.16324e+07
FOXA2	0	0	1.73164e+06
CUX1	0	0	1.13795e+06
CTCFL	0	0	6.83536e+06
CREM	0	0	3.371e+06
ARID5B	0	0	1.40076e+06
ADNP	0	0	1.77234e+06
ARID2	0	0	1.33108e+06
ARID1A	967450	0	1.4709e+07
HMBOX1	1.75949e+07	1.81727e+07	6.53759e+06
PDS5B	5.16966e+06	427962	8.94555e+07
HNF1A	2.57179e+07	1.63163e+07	9.34701e+06
NFIB	4.54537e+07	5.91212e+07	7.62816e+07
MTA3	0	3.12284e+07	2.42599e+07
MTA1	0	2.99699e+07	2.42599e+07
SMAD3	3.81484e+06	0	675936
ONECUT2	5.13859e+06	1.08246e+06	0
TBP	0	1.49927e+07	1.55931e+07
PROX1	560627	0	0
PRDM16	1.15553e+07	0	0
PBX1	2931527	0	0
NR2F2	4.98361e+06	0	0
NOC3L	1.18804e+06	0	0
NFKB1	983401	0	0
IRF3	5.07978e+06	0	0
CEBPZ	1.51271e+06	0	0
IKZF4	9.31727e+07	0	0
MTA2	0	4.22412e+07	4.59416e+07
ZKSCAN16	0	1.94242e+06	2.25454e+06

## Sheet: G6pcp heatmap table
	V	Dex/cAMP	D/C/I
TERF2	5.53203e+06	4.8135e+06	1.0078e+07
GCFC1	1.10691e+07	1.08187e+07	1.24344e+07
NFYA	1.21102e+07	1.1082e+07	1.70593e+07
MTA1	951639	1.44952e+06	5.12734e+06
AHCTF1	1.77721e+08	1.80205e+08	1.98265e+08
NFIA	5.83794e+07	6.06172e+07	7.68383e+07
ARID1A	1.36855e+07	1.4844e+07	2.06295e+07
TOX4	2.42517e+07	2.66321e+07	3.83276e+07
GATAD2B	9.55739e+06	1.00591e+07	15773523
CEBPA	5.32054e+06	5.68989e+06	1.02661e+07
HMGB3	1.84644e+07	17945314	1.13134e+07
SMARCC2	2.77451e+07	2.82644e+07	3.61223e+07
TEAD1	3.0471e+07	2.99867e+07	2.03954e+07
FOXK2	0	0	658845
HMG20B	0	0	557738
GABPA	0	0	1.4461e+06
SOX4	0	0	523903
ZFP787	0	0	252154
KLF3	0	0	3.41897e+06
BAZ2B	0	0	758137
ZFP771	0	0	922220
UBTF	0	0	1.32315e+07
GATA6	0	0	2.47793e+06
PDS5B	3.27124e+07	3.2408e+07	4.43251e+07
NFYC	3.43296e+07	3.45838e+07	2.5417e+07
ONECUT1	7.48129e+06	6.90577e+06	5.71957e+06
ARID5B	0	879008	2.54186e+06
NFIB	5.41029e+07	5.07668e+07	4.0499e+07
BPTF	0	313540	1.35892e+06
HMGN1	4.0139e+07	3.16658e+07	9.70566e+06
TEAD3	779615	576807	0
NFRKB	973173	1.69964e+06	2.34278e+06
TCF7L2	3.16188e+06	1.584e+06	0
KIN	4.11928e+06	3.59971e+06	2.84642e+06
FOSL2	2.32391e+06	1.40038e+06	0
MRPL28	4.98083e+06	3.98531e+06	2.71993e+06
TBP	1.13962e+07	9.84509e+06	8.07011e+06
NFYB	3.64919e+07	40652514	2.54461e+07
NFIX	109980859	9.88714e+07	1.33484e+08
TCF20	2.97792e+06	2.74027e+06	3.50806e+06
NFIC	1.31816e+08	1.13322e+08	1.53569e+08
SP2	299996	487138	0
SMARCA5	4.26918e+07	3.11509e+07	5.95825e+07
GATAD2A	1.06137e+07	7.85268e+06	1.47377e+07
GATA4	6.48166e+06	5.12187e+06	7.28668e+06
FOXA2	4.15345e+06	2.32036e+06	5.54942e+06
TERF2IP	8.02904e+06	6.25045e+06	8.72311e+06
ZFP384	7.96736e+06	3.59524e+06	9.91825e+06
ARID1B	1.21584e+07	5.81347e+06	1.39256e+07
CREB1	155761	975935	0
HMGA1	1.26225e+08	4.09065e+07	0
MAFF	0	8.51187e+06	1.24059e+07
ELF1	4.23508e+06	2.04544e+06	1.64718e+06
ZFP655	4.6813e+06	816010	0
SALL1	0	4.28384e+06	5.61008e+06
ZFP207	3.11462e+07	3.45155e+07	3.5465e+07
BAZ2A	0	2.17492e+06	2.76647e+06
ZFP148	0	1.80015e+06	1.99726e+06
NFIL3	126047	1.15869e+07	1.2266e+07
DNAJC1	0	1.5282e+06	1.6347e+06
BCL11B	3.65996e+08	145230653	1.28921e+08
NR5A2	1.56213e+07	7.5136e+06	7.92079e+06
RREB1	9.67959e+06	3.44071e+06	3.58181e+06
CBX2	1.23207e+06	0	0
ETS1	2.41735e+06	0	0
TFDP1	2.41108e+06	0	0
ARNTL	1.0467e+06	0	0
MAFG	6.44353e+06	0	0
ZFP553	1.70194e+06	0	0
NAB1	2.56335e+06	0	0
ZBTB45	3.65583e+06	0	0
DMAP1	1.12483e+06	0	0
JUNB	3.078e+06	0	0
ZFP422	3.62663e+06	0	0
YY1	3.7369e+07	0	0
UBTF	2.02122e+06	0	0
CSDA	3.96813e+06	0	0
ZBTB20	1.41605e+07	1.26913e+07	1.2906e+07
DNAJC2	0	3.25911e+06	2.8067e+06
ZNF512B	0	4.46502e+06	3.85166e+06
HNF1A	2.89127e+07	1.64767e+07	1.77134e+07
ELF2	1.32999e+07	6.56231e+06	7.24778e+06
RYBP	9.58323e+06	4.23636e+06	4.89131e+06
TFAM	3.45e+08	2.32281e+08	2.44701e+08
SMARCC1	2.09491e+07	2.19825e+07	2.1863e+07
HMBOX1	3.64567e+07	5.10827e+06	8.73347e+06
WIZ	6.12673e+06	2.06376e+06	3.03618e+06
CEBPB	5.2236e+07	187943651	1.62547e+08
ELK4	5.98192e+06	2.19162e+07	1.89827e+07
FOXK1	6.62929e+06	0	3.71199e+06
DRAP1	9.05166e+06	3.36661e+06	6.59504e+06
HNF4A	2.97297e+06	0	1.55875e+06
ZFP91	8.99678e+06	0	4.60951e+06
TFE3	8.33454e+07	6.52009e+07	7.14036e+07
RBPJ	1.48461e+07	9.45045e+06	1.11573e+07
CTCF	8.89401e+06	1.81645e+06	4.49884e+06
UBP1	2.16727e+07	6.37966e+06	1.26092e+07
ZHX2	7.71615e+06	851378	3.62567e+06
ONECUT2	5.49979e+07	3.03721e+07	4.14653e+07
IRF3	3.45004e+06	414842	1.76914e+06
HMG20A	5.7776e+06	5.33723e+06	5.54893e+06
SMAD3	4383428	0	2.05604e+06
VEZF1	3.38814e+06	0	3.50008e+06
HMGN5	5.02844e+06	3.11181e+07	4.69026e+06
ZHX1	0	719040	0
ARID2	0	1.34617e+06	0
TFEB	0	826438	0
HNF1B	0	1.97763e+06	0
ZFHX3	1.09073e+07	5.93966e+06	1.00278e+07
MTA2	2.4201e+07	1.96361e+07	2.35172e+07
NRF1	3.46279e+06	6.32626e+06	3.88764e+06
SMARCE1	4.89444e+07	2.7024e+07	4.17884e+07
CEBPZ	1.28438e+07	4.36232e+06	1.00733e+07
NOC3L	2.87106e+06	670566	2.35668e+06
CDC5L	9.39371e+07	7.35153e+07	8.87602e+07
RFX5	4.24073e+06	1.50183e+06	3.53333e+06

## Sheet: Overall TF summary
Pck1p	Exp1	Exp2	Exp3	Common TFs on Pck1p among 3 exps	Common in 2 exps	Common TFs >=2 exps		G6pcp	Exp1	Exp2	Exp3	common on G6pcp among 3 exps	Common in 2 exps	Common TFs >=2 exps		Common TFs on Pck1p among 3 exps	common on G6pcp among 3 exps	Common TFs on both promoters	Selective TFs on Pck1p	Selective TFs on G6pcp			PH-Common TFs on both promoters	PH-Selective TFs on Pck1p	PH-Selective TFs on G6pcp		Liver Common TFs	Liver G6pcp selective TFs	Liver Pck1p selective TFs		PH & Liver common TFs	Liver/PH G6pcp common selective TFs	Liver /PH Pck1p common selective TFs
	ADNP	AHCTF1	AHCTF1	AHCTF1	ADNP	ADNP			DRAP1	ARNTL	ARNTL	AHCTF1	ARNTL	AHCTF1		AHCTF1	AHCTF1	AHCTF1	ATF4	CEBPG			AHCTF1	ATF4	CEBPG		AHCTF1	DNAJC2	ADNP		AHCTF1	DR1	GATA6
	AHCTF1	ARID1A	ARID1A	ARID1A	ARID2	AHCTF1			HMG20A	BPTF	BPTF	ARID1A	BPTF	ARID1A		ARID1A	ARID1A	ARID1A	CLOCK	CREB1			ARID1A	CLOCK	CREB1		ARID1A	DR1	ARID1B		ARID1A	ELK4	KLF3
	ARID1A	ARID1B	ARID1B	ARID1B	ARNTL	ARID1A			HMGN5	BZW1	BZW1	ARID1B	BZW1	ARID1B		ARID1B	ARID1B	ARID1B	DNAJC2	CSDA			ARID1B	DNAJC2	CSDA		ARID5B	ELK4	BAZ2A		ARID5B	ZBTB45
	ARID1B	ARID5B	ARID5B	ARID5B	BCL11B	ARID1B			HNF4A	FOXA2	DRAP1	ARID5B	DRAP1	ARID5B		ARID5B	ARID5B	ARID5B	DRAP1	CTCF			ARID5B	DRAP1	CTCF		CDC5L	GABPA	BAZ2B		CDC5L
	ARID2	ARNTL	ATF4	ATF4	BPTF	ARID2			MAFG	HIC2	FOXA2	CDC5L	FOXA2	CDC5L		CDC5L	CDC5L	CDC5L	E2F3	CUX1			CDC5L	E2F3	CUX1		CEBPA	HMGA2	CEBPD		CEBPA
	ARID5B	ATF4	CDC5L	CDC5L	BZW1	ARID5B			NFYB	IRF3	HIC2	CEBPA	HIC2	CEBPA		CEBPA	CEBPA	CEBPA	ESRRA	DR1			CEBPA	ESRRA	DR1		CEBPB	HMGB2	CEBPE		CEBPB
	ATF4	BPTF	CEBPA	CEBPA	CSDA	ARNTL			NKX1-2	MRPL28	HMG20A	CEBPB	HMG20A	CEBPB		CEBPB	CEBPB	CEBPB	FOXK1	ELF1			CEBPB	FOXK1	ELF1		CEBPZ	HOXB3	CSDA		CEBPZ
	BCL11B	BZW1	CEBPB	CEBPB	CSDE1	ATF4			NOC3L	NAB1	HMGN5	CEBPG	HMGN5	CEBPG		CEBPZ	CEBPZ	CEBPZ	FOXK2	ELK4			CEBPZ	FOXK2	ELK4		DMAP1	NFYB	DLX1		DMAP1
	CDC5L	CDC5L	CEBPZ	CEBPZ	DNAJC1	BCL11B			ONECUT1	NKX1-2	HNF4A	CEBPZ	HNF4A	CEBPZ		DMAP1	DMAP1	DMAP1	GATA6	GCFC1			DMAP1	GATA6	GCFC1		ELF2	ZBTB45	E2F4		ELF2
	CEBPA	CEBPA	CLOCK	CLOCK	ELK4	BPTF			TCF20	NRF1	IRF3	CREB1	IRF3	CREB1		ELF2	ELF2	ELF2	HMG20A	HMGA1			ELF2	HMG20A	HMGA1		GATA4	ZFP276	EP400		GATA4
	CEBPB	CEBPB	DMAP1	DMAP1	FOXA2	BZW1			TCF7L2	RYBP	MAFG	CSDA	MAFG	CSDA		GATA4	GATA4	GATA4	HMGN5	HMGN1			GATA4	HMGN5	HMGN1		GATAD2A	ZFP746	ESRRG		GATAD2A
	CEBPZ	CEBPZ	DNAJC2	DNAJC2	HMGA1	CDC5L			TCFE3	SSRP1	MRPL28	CTCF	MRPL28	CTCF		GATAD2A	GATAD2A	GATAD2A	HNF4A	JUNB			GATAD2A	HNF4A	JUNB		GATAD2B		FOXO1		GATAD2B
	CLOCK	CLOCK	DRAP1	DRAP1	HOXB3	CEBPA			TCFEB	TBP	NAB1	CUX1	NAB1	CUX1		GATAD2B	GATAD2B	GATAD2B	IRF3	KIN			GATAD2B	IRF3	KIN		HMBOX1		GATA6		HMBOX1
	CSDA	CSDE1	E2F3	E2F3	JUNB	CEBPB			ZFP384	TCFE3	NFYB	DMAP1	NFYB	DMAP1		HMBOX1	HMBOX1	HMBOX1	KLF3	MAFF			HMBOX1	KLF3	MAFF		HMGB3		HLF		HMGB3
	CUX1	CUX1	ELF2	ELF2	JUND	CEBPZ			AHCTF1	TCFEB	NOC3L	DR1	NKX1-2	DR1		HMGB3	HMGB3	HMGB3	MITF	NFIX			HMGB3	MITF	NFIX		HNF1A		KLF3		HNF1A
	DMAP1	DMAP1	ESRRA	ESRRA	KIN	CLOCK			ARID1A	ZFP91	NRF1	ELF1	NOC3L	ELF1		HNF1A	HNF1A	HNF1A	MRPL28	NFYA			HNF1A	MRPL28	NFYA		MTA1		MAZ		MTA1
	DNAJC1	DNAJC2	FOXK1	FOXK1	MAFF	CSDA			ARID1B	ZHX2	ONECUT1	ELF2	NRF1	ELF2		JUN	JUN	JUN	NOC3L	NFYC			JUN	NOC3L	NFYC		MTA2		NAB1		MTA2
	DNAJC2	DRAP1	FOXK2	FOXK2	MYC	CSDE1			ARID5B	AHCTF1	RYBP	ELK4	ONECUT1	ELK4		KLF13	KLF13	KLF13	NR2C2	ONECUT2			KLF13	NR2C2	ONECUT2		NFIA		NFATC3		NFIA
	DRAP1	E2F3	GATA4	GATA4	NFIX	CUX1			CDC5L	ARID1A	SSRP1	GATA4	RYBP	GATA4		MTA1	MTA1	MTA1	NRF1	RREB1			MTA1	NRF1	RREB1		NFIB		NFRKB		NFIB
	E2F3	ELF2	GATA6	GATA6	NFYC	DMAP1			CEBPA	ARID1B	TBP	GATAD2A	SSRP1	GATAD2A		MTA2	MTA2	MTA2	RB1	SOX4			MTA2	RB1	SOX4		NFIC		NR1H2		NFIC
	ELF2	ESRRA	GATAD2A	GATAD2A	ONECUT2	DNAJC1			CEBPB	ARID5B	TCF20	GATAD2B	TBP	GATAD2B		MTA3	MTA3	MTA3	RUNX1	ZBTB45			MTA3	RUNX1	ZBTB45		NFIL3		NR2C1		NFIL3
	ELK4	FOXK1	GATAD2B	GATAD2B	RFX1	DNAJC2			CEBPG	CDC5L	TCF7L2	GCFC1	TCF20	GCFC1		NFIA	NFIA	NFIA	RYBP	ZFP187			NFIA	RYBP	ZFP187		NR5A2		PBX1		NR5A2
	ESRRA	FOXK2	HMBOX1	HMBOX1	RREB1	DRAP1			CEBPZ	CEBPA	ZFP384	HMBOX1	TCF7L2	HMBOX1		NFIB	NFIB	NFIB	TBX3	ZFP207			NFIB	TBX3	ZFP207		PDS5B		PBX2		PDS5B
	FOXA2	GATA4	HMG20A	HMG20A	SSRP1	E2F3			CREB1	CEBPB	ZFP91	HMGA1	TCFE3	HMGA1		NFIC	NFIC	NFIC	ZBTB44	ZFP422			NFIC	ZBTB44	ZFP422		RBPJ		SP3		RBPJ
	FOXK1	GATA6	HMGB3	HMGB3	TCF20	ELF2			CSDA	CEBPG	ZHX2	HMGB3	TCFEB	HMGB3		NFIL3	NFIL3	NFIL3	ZBTB7A	ZFP771			NFIL3	ZBTB7A	ZFP771		SALL1		SREBF1		SALL1
	FOXK2	GATAD2A	HMGN5	HMGN5	TCF7L2	ELK4			CTCF	CEBPZ	AHCTF1	HMGN1	ZFP384	HMGN1		NFRKB	NFRKB	NFRKB	ZFP384				NFRKB	ZFP384			SMARCA5		ZFP160		SMARCA5
	GATA4	GATAD2B	HNF1A	HNF1A	ZBTB45	ESRRA			CUX1	CREB1	ARID1A	HNF1A	ZFP91	HNF1A		NR5A2	NR5A2	NR5A2	ZHX2				NR5A2	ZHX2			SMARCC1		ZFP260		SMARCC1
	GATA6	HMBOX1	HNF4A	HNF4A	ZFHX4	FOXA2			DMAP1	CSDA	ARID1B	JUN	ZHX2	JUN		PDS5B	PDS5B	PDS5B	ZHX3				PDS5B	ZHX3			SMARCC2		ZFP319		SMARCC2
	GATAD2A	HMG20A	IRF3	IRF3	ZFP655	FOXK1			DR1	CTCF	ARID2	JUNB		JUNB		RBPJ	RBPJ	RBPJ					RBPJ				SMARCE1		ZFP709		SMARCE1
	GATAD2B	HMGB3	JUN	JUN	ZFP91	FOXK2			ELF1	CUX1	ARID5B	KIN		KIN		RFX5	RFX5	RFX5					RFX5				SP1		ZFP91		SP1
	HMBOX1	HMGN5	KLF13	KLF13	CUX1	GATA4			ELF2	DMAP1	BAZ2A	KLF13		KLF13		SALL1	SALL1	SALL1					SALL1				TEAD1				TEAD1
	HMG20A	HNF1A	KLF3	KLF3	NR2F2	GATA6			ELK4	DR1	BAZ2B	MAFF		MAFF		SMAD3	SMAD3	SMAD3					SMAD3				TERF2				TERF2
	HMGA1	HNF4A	MITF	MITF	PBX2	GATAD2A			GATA4	ELF1	BCL11B	MTA1		MTA1		SMARCA5	SMARCA5	SMARCA5					SMARCA5				TERF2IP				TERF2IP
	HMGB3	IRF3	MRPL28	MRPL28	POU2F1	GATAD2B			GATAD2A	ELF2	CBX2	MTA2		MTA2		SMARCC1	SMARCC1	SMARCC1					SMARCC1				TFAM				TFAM
	HMGN5	JUN	MTA1	MTA1	PROX1	HMBOX1			GATAD2B	ELK4	CDC5L	MTA3		MTA3		SMARCC2	SMARCC2	SMARCC2					SMARCC2				TOX4				TOX4
	HNF1A	JUNB	MTA2	MTA2	SMAD4	HMG20A			GCFC1	GATA4	CEBPA	NFIA		NFIA		SMARCE1	SMARCE1	SMARCE1					SMARCE1				UBP1				UBP1
	HNF4A	JUND	MTA3	MTA3	TADA2B	HMGA1			HMBOX1	GATAD2A	CEBPB	NFIB		NFIB		SP1	SP1	SP1					SP1				UBTF				UBTF
	HOXB3	KLF13	NFIA	NFIA	TBP	HMGB3			HMGA1	GATAD2B	CEBPG	NFIC		NFIC		SP2	SP2	SP2					SP2				VEZF1				VEZF1
	IRF3	KLF3	NFIB	NFIB	TCFAP2D	HMGN5			HMGB3	GCFC1	CEBPZ	NFIL3		NFIL3		TEAD1	TEAD1	TEAD1					TEAD1				WIZ				WIZ
	JUN	MITF	NFIC	NFIC	TCFAP4	HNF1A			HMGN1	HMBOX1	CREB1	NFIX		NFIX		TERF2	TERF2	TERF2					TERF2				YBX1				YBX1
	KIN	MRPL28	NFIL3	NFIL3	TCFCP2L1	HNF4A			HNF1A	HMGA1	CSDA	NFRKB		NFRKB		TERF2IP	TERF2IP	TERF2IP					TERF2IP				YY1				YY1
	KLF13	MTA1	NFRKB	NFRKB	TFDP1	HOXB3			JUN	HMGB3	CSDE1	NFYA		NFYA		TFAM	TFAM	TFAM					TFAM				ZBTB20				ZBTB20
	KLF3	MTA2	NOC3L	NOC3L		IRF3			JUNB	HMGN1	CTCF	NFYC		NFYC		TOX4	TOX4	TOX4					TOX4				ZFHX3				ZFHX3
	MAFF	MTA3	NR2C2	NR2C2		JUN			KIN	HNF1A	CUX1	NR5A2		NR5A2		UBP1	UBP1	UBP1					UBP1				ZFP148				ZFP148
	MITF	MYC	NR5A2	NR5A2		JUNB			KLF13	JUN	DMAP1	ONECUT2		ONECUT2		UBTF	UBTF	UBTF					UBTF				ZFP512				ZFP512
	MRPL28	NFIA	NRF1	NRF1		JUND			MAFF	JUNB	DNAJC1	PDS5B		PDS5B		VEZF1	VEZF1	VEZF1					VEZF1				ZNF512B				ZNF512B
	MTA1	NFIB	PDS5B	PDS5B		KIN			MTA1	KIN	DNAJC2	RBPJ		RBPJ		WIZ	WIZ	WIZ					WIZ				ARNTL
	MTA2	NFIC	RB1	RB1		KLF13			MTA2	KLF13	DR1	RFX5		RFX5		YBX1	YBX1	YBX1					YBX1				BCL11B				46
	MTA3	NFIL3	RBPJ	RBPJ		KLF3			MTA3	MAFF	EGR1	RREB1		RREB1		YY1	YY1	YY1					YY1				BHLHE40
	NFIA	NFIX	RFX5	RFX5		MAFF			NFIA	MTA1	ELF1	SALL1		SALL1		ZBTB20	ZBTB20	ZBTB20					ZBTB20				CEBPG
	NFIB	NFIX	RUNX1	RUNX1		MITF			NFIB	MTA2	ELF2	SMAD3		SMAD3		ZFHX3	ZFHX3	ZFHX3					ZFHX3				CLOCK
	NFIC	NFRKB	RYBP	RYBP		MRPL28			NFIC	MTA3	ELK4	SMARCA5		SMARCA5		ZFP148	ZFP148	ZFP148					ZFP148				CREB1
	NFIL3	NFYC	SALL1	SALL1		MTA1			NFIL3	NFIA	ETS1	SMARCC1		SMARCC1		ZFP512	ZFP512	ZFP512					ZFP512				CTCF
	NFIX	NOC3L	SMAD3	SMAD3		MTA2			NFIX	NFIB	ETV3	SMARCC2		SMARCC2		ZNF512B	ZNF512B	ZNF512B					ZNF512B				CUX1
	NFIX	NR2C2	SMARCA5	SMARCA5		MTA3			NFRKB	NFIC	FOSL2	SMARCE1		SMARCE1		ATF4	CEBPG										DBP
	NFRKB	NR2F2	SMARCC1	SMARCC1		MYC			NFYA	NFIL3	FOXK1	SOX4		SOX4		CLOCK	CREB1	54	28	25			54	28	25		DRAP1
	NOC3L	NR5A2	SMARCC2	SMARCC2		NFIA			NFYC	NFIX	FOXK2	SP1		SP1		DNAJC2	CSDA										ERG
	NR2C2	NRF1	SMARCE1	SMARCE1		NFIB			NR5A2	NFRKB	GABPA	SP2		SP2		DRAP1	CTCF										ESRRA
	NR2F2	PBX2	SP1	SP1		NFIC			ONECUT2	NFYA	GATA4	TEAD1		TEAD1		E2F3	CUX1										FOXA1
	NR5A2	PDS5B	SP2	SP2		NFIL3			PDS5B	NFYC	GATA6	TERF2		TERF2		ESRRA	DR1										FOXA2
	NRF1	POU2F1	TBX3	TBX3		NFIX			RBPJ	NR5A2	GATAD1	TERF2IP		TERF2IP		FOXK1	ELF1										FOXK1
	ONECUT2	PROX1	TEAD1	TEAD1		NFRKB			RFX5	ONECUT2	GATAD2A	TFAM		TFAM		FOXK2	ELK4										GCFC1
	PBX2	RB1	TERF2	TERF2		NFYC			RREB1	PDS5B	GATAD2B	TOX4		TOX4		GATA6	GCFC1										GZF1
	PDS5B	RBPJ	TERF2IP	TERF2IP		NOC3L			SALL1	RBPJ	GCFC1	UBP1		UBP1		HMG20A	HMGA1										HIC2
	POU2F1	RFX1	TFAM	TFAM		NR2C2			SMAD3	RFX5	HMBOX1	UBTF		UBTF		HMGN5	HMGN1										HMG20A
	PROX1	RFX5	TOX4	TOX4		NR2F2			SMARCA5	RREB1	HMG20B	VEZF1		VEZF1		HNF4A	JUNB										HMGA1
	RB1	RUNX1	UBP1	UBP1		NR5A2			SMARCC1	SALL1	HMGA1	WIZ		WIZ		IRF3	KIN										HMGN1
	RBPJ	RYBP	UBTF	UBTF		NRF1			SMARCC2	SMAD3	HMGB3	YBX1		YBX1		KLF3	MAFF										HMGN5
	RFX5	SALL1	VEZF1	VEZF1		ONECUT2			SMARCE1	SMARCA5	HMGN1	YY1		YY1		MITF	NFIX										HNF1B
	RREB1	SMAD3	WIZ	WIZ		PBX2			SOX4	SMARCC1	HNF1A	ZBTB20		ZBTB20		MRPL28	NFYA										HNF4A
	RUNX1	SMAD4	YBX1	YBX1		PDS5B			SP1	SMARCC2	HNF1B	ZBTB45		ZBTB45		NOC3L	NFYC										IKZF5
	RYBP	SMARCA5	YY1	YY1		POU2F1			SP2	SMARCE1	JUN	ZFHX3		ZFHX3		NR2C2	ONECUT2										IRF3
	SALL1	SMARCC1	ZBTB20	ZBTB20		PROX1			TEAD1	SOX4	JUNB	ZFP148		ZFP148		NRF1	RREB1										KLF15
	SMAD3	SMARCC2	ZBTB44	ZBTB44		RB1			TERF2	SP1	KIN	ZFP187		ZFP187		RB1	SOX4										LHX2
	SMAD4	SMARCE1	ZBTB7A	ZBTB7A		RBPJ			TERF2IP	SP2	KLF13	ZFP207		ZFP207		RUNX1	ZBTB45										MAFG
	SMARCA5	SP1	ZFHX3	ZFHX3		RFX1			TFAM	TEAD1	KLF3	ZFP422		ZFP422		RYBP	ZFP187										MLX
	SMARCC1	SP2	ZFP148	ZFP148		RFX5			TOX4	TERF2	MAFF	ZFP512		ZFP512		TBX3	ZFP207										MLXIPL
	SMARCC2	SSRP1	ZFP384	ZFP384		RREB1			UBP1	TERF2IP	MTA1	ZFP771		ZFP771		ZBTB44	ZFP422										NFATC1
	SMARCE1	TADA2B	ZFP512	ZFP512		RUNX1			UBTF	TFAM	MTA2	ZNF512B		ZNF512B		ZBTB7A	ZFP771										NFIX
	SP1	TBP	ZHX2	ZHX2		RYBP			VEZF1	TOX4	MTA3			ARNTL		ZFP384											NFYA
	SP2	TBX3	ZHX3	ZHX3		SALL1			WIZ	UBP1	NFIA	79	28	BPTF		ZHX2	79										NFYC
	TADA2B	TCF7L2	ZNF512B	ZNF512B		SMAD3			YBX1	UBTF	NFIB			BZW1		ZHX3											NKX1-2
	TBP	TCFAP2D	ADNP			SMAD4			YY1	VEZF1	NFIC			DRAP1													NOC3L
	TBX3	TCFAP4	ARID2			SMARCA5			ZBTB20	WIZ	NFIL3			FOXA2													NR1D1
	TCF20	TCFCP2L1	ARNTL			SMARCC1			ZBTB45	YBX1	NFIX			HIC2													NR1H4
	TCFAP2D	TEAD1	BCL11B			SMARCC2			ZFHX3	YY1	NFRKB			HMG20A													NR1I2
	TCFAP4	TERF2	BPTF	82	42	SMARCE1			ZFP148	ZBTB20	NFYA			HMGN5		82											NR1I3
	TCFCP2L1	TERF2IP	BZW1			SP1			ZFP187	ZBTB45	NFYC			HNF4A													NR2C2
	TEAD1	TFAM	CSDA			SP2			ZFP207	ZFHX3	NR5A2			IRF3													NR2F2
	TERF2	TFDP1	CSDE1			SSRP1			ZFP422	ZFP148	ONECUT2			MAFG													NR2F6
	TERF2IP	TOX4	DNAJC1			TADA2B			ZFP512	ZFP187	PDS5B			MRPL28													NR3C1
	TFAM	UBP1	ELK4			TBP			ZFP771	ZFP207	RBPJ			NAB1													NRF1
	TFDP1	UBTF	FOXA2			TBX3			ZNF512B	ZFP422	RFX5			NFYB													ONECUT1
	TOX4	VEZF1	HMGA1			TCF20			CEBPD	ZFP512	RREB1			NKX1-2													ONECUT2
	UBP1	WIZ	HOXB3			TCF7L2			DACH1	ZFP771	SALL1			NOC3L													PPARA
	UBTF	YBX1	JUNB			TCFAP2D			HMGXB3	ZNF512B	SKIL			NRF1													PROX1
	VEZF1	YY1	JUND			TCFAP4			HOXC4	BNC1	SMAD2			ONECUT1													REPIN1
	WIZ	ZBTB20	KIN			TCFCP2L1			HOXD11	CLOCK	SMAD3			RYBP													RREB1
	YBX1	ZBTB44	MAFF			TEAD1			ID1	ESRRA	SMARCA5			SSRP1													RXRA
	YY1	ZBTB45	MYC			TERF2			JUND	KLF12	SMARCC1			TBP													RXRG
	ZBTB20	ZBTB7A	NFIX			TERF2IP			KLF16	PRDM1	SMARCC2			TCF20													RYBP
	ZBTB44	ZFHX3	NFYC			TFAM			MAFK	TCF7L1	SMARCE1			TCF7L2													TADA2B
	ZBTB7A	ZFP148	ONECUT2			TFDP1			MIER1	TCFCP2	SOX4			TCFE3													TBP
	ZFHX3	ZFP384	RFX1			TOX4			RB1	TCFCP2L1	SP1			TCFEB													TBX3
	ZFHX4	ZFP512	RREB1			UBP1			RUNX1	ZBTB7A	SP2			ZFP384													TCF20
	ZFP148	ZFP655	SSRP1			UBTF			STAT3		SP3			ZFP91													TCF7L2
	ZFP384	ZFP91	TCF20			VEZF1			TTF1		TEAD1			ZHX2													TEAD3
	ZFP512	ZHX2	TCF7L2			WIZ			VDR		TEAD3																TEF
	ZHX2	ZHX3	ZBTB45			YBX1			ZFP189		TERF1																TFAP4
	ZHX3	ZNF512B	ZFHX4			YY1			ZFP212		TERF2			107													TFE3
	ZNF512B	AHR	ZFP655			ZBTB20			ZFX		TERF2IP																TFEB
	AEBP2	ATF1	ZFP91			ZBTB44					TFAM																XBP1
	ARX	BARHL1	BAZ2A			ZBTB45					TFDP1																ZBTB43
	BCL11A	CHD6	BAZ2B			ZBTB7A					TFE3																ZBTB44
	BCL6	DZIP1	CEBPD			ZFHX3					TFEB																ZBTB7A
	CREM	FOXJ2	CEBPG			ZFHX4					TOX4																ZFP187
	CTCFL	FOXO6	CIC			ZFP148					UBP1																ZFP207
	E2F8	GBX2	CREB1			ZFP384					UBTF																ZFP292
	EN1	HOMEZ	CTCF			ZFP512					VEZF1																ZFP362
	FOXO1	HOXA10	EGR1			ZFP655					WIZ																ZFP384
	GLIS3	LMX1B	EP400			ZFP91					YBX1																ZFP422
	GMEB2	MIER1	ETV3			ZHX2					YY1																ZFP655
	HIC2	MIER2	FIZ1			ZHX3					ZBTB20																ZFP800
	HIVEP3	NFAT5	FOXA1			ZNF512B					ZBTB45																ZFX
	HMG20B	NFE2L2	GCFC1								ZFHX3																ZHX1
	IKZF4	NOTCH2	GZF1			124					ZFP148																ZHX2
	IRX3	NR3C1	HMGN1								ZFP187																ZHX3
	MAZ	ONECUT3	HNF1B								ZFP207																ZKSCAN3
	MIS18BP1	PGR	MAFG								ZFP422
	MNT	SKI	MAFK								ZFP512
	NFKB1	SOX17	NKX1-2								ZFP553																128	11	30
	NR2C1	SREBF1	NR4A3								ZFP655
	PBX1	STAT3	ONECUT1								ZFP771
	POU4F2	STAT6	PRDM1								ZFP787
	PRDM16	TBX2	RXRB								ZHX1
	RBL2	TCF3	SP3								ZHX3
	RFX7	ZBTB43	TCF12								ZNF512B
	SKOR1	ZBTB48	TEAD3
	SOX1	ZFP143	TFAP4
	SOX2	ZFP161	TFCP2						111	105	137
	TCFCP2	ZFP184	TFCP2L1
	TWIST1	ZFP191	TFE3
	USF1	ZFP276	TFEB
	XBP1	ZFP37	ZFP187
	YEATS4	ZFP609	ZFP207
	ZFP746	ZHX1	ZFP341
	ZKSCAN16	ZKSCAN1	ZFP422
		ZKSCAN3	ZFP553
			ZFP668
			ZFP771
			ZFP787
			ZFX
	147	148	152

## Sheet: Functional analysis
																								Common TFs on both promoters		pathway name	set size	candidates	p-value	q-value	pathway source			Selective TFs on Pck1p		pathway name	set size	candidates	p-value	q-value	pathway source		Selective TFs on G6pcp		pathway name	set size	candidates	p-value	q-value
																								AHCTF1				contained						ATF4				contained					CEBPG				contained
																								ARID1A		Gene expression (Transcription)	1372	24 (1.8%)	3.56e-13	3.88e-11	Reactome			CLOCK		Nuclear Receptor transcription pathway	51	3 (5.9%)	7.41e-05	0.00178	Reactome		CREB1		overview of telomerase rna component gene hterc transcriptional regulation	7	2 (28.6%)	3.03e-05	0.00048
																								ARID1B		Chromatin modifying enzymes	270	12 (4.4%)	4.89e-11	1.78e-09	Reactome			DNAJC2		Hepatitis B - Homo sapiens (human)	144	4 (2.8%)	7.75e-05	0.00178	KEGG		CSDA		Tuberculosis - Homo sapiens (human)	179	4 (2.2%)	5.65e-05	0.00048
																								ARID5B		Chromatin organization	270	12 (4.4%)	4.89e-11	1.78e-09	Reactome			DRAP1		Melanoma - Homo sapiens (human)	72	3 (4.2%)	0.000208	0.0028	KEGG		CTCF		Antigen processing and presentation - Homo sapiens (human)	77	3 (3.9%)	0.000109	0.000618
																								CDC5L		RNA Polymerase I Transcription Initiation	48	6 (12.5%)	1.07e-08	2.91e-07	Reactome			E2F3		Chronic myeloid leukemia - Homo sapiens (human)	76	3 (3.9%)	0.000244	0.0028	KEGG		CUX1		oxidative stress induced gene expression via nrf2	18	2 (11.1%)	0.000219	0.000931
																								CEBPA		the information processing pathway at the ifn beta enhancer	29	5 (17.2%)	3.66e-08	7.98e-07	BioCarta			ESRRA		Prostate cancer - Homo sapiens (human)	97	3 (3.1%)	0.0005	0.0046	KEGG		DR1		Activation of gene expression by SREBF (SREBP)	26	2 (7.7%)	0.000463	0.00157
																								CEBPB		Regulation of PTEN gene transcription	62	6 (9.7%)	5.17e-08	9.4e-07	Reactome			FOXK1		RUNX1 interacts with co-factors whose precise effect on RUNX1 targets is not known	40	2 (5.1%)	0.00181	0.0106	Reactome		ELF1		p38 mapk signaling pathway	31	2 (6.5%)	0.00066	0.0016
																								CEBPZ		RUNX1 interacts with co-factors whose precise effect on RUNX1 targets is not known	40	5 (12.8%)	1.73e-07	2.48e-06	Reactome			FOXK2		Cushing,s syndrome - Homo sapiens (human)	154	3 (1.9%)	0.00191	0.0106	KEGG		ELK4		Regulation of cholesterol biosynthesis by SREBP (SREBF)	31	2 (6.5%)	0.00066	0.0016
																								DMAP1		chromatin remodeling by hswi/snf atp-dependent complexes	16	4 (25.0%)	1.91e-07	2.48e-06	BioCarta			GATA6		Bladder cancer - Homo sapiens (human)	41	2 (4.9%)	0.002	0.0106	KEGG		GCFC1		TNF signaling pathway - Homo sapiens (human)	108	2 (1.9%)	0.00775	0.0165
																								ELF2		Generic Transcription Pathway	1106	16 (1.5%)	2.05e-07	2.48e-06	Reactome			HMG20A		Cyclin D associated events in G1	44	2 (4.5%)	0.0023	0.0106	Reactome		HMGA1
																								GATA4		Epigenetic regulation of gene expression	151	7 (4.7%)	5.75e-07	6.27e-06	Reactome			HMGN5		G1 Phase	44	2 (4.5%)	0.0023	0.0106	Reactome		HMGN1
																								GATAD2A		PTEN Regulation	96	6 (6.2%)	7.17e-07	7.11e-06	Reactome			HNF4A		Transcriptional misregulation in cancer - Homo sapiens (human)	186	3 (1.6%)	0.00321	0.0125	KEGG		JUNB
																								GATAD2B		RNA Polymerase II Transcription	1235	16 (1.3%)	9.29e-07	8.44e-06	Reactome			IRF3		Kaposi,s sarcoma-associated herpesvirus infection - Homo sapiens (human)	186	3 (1.6%)	0.00326	0.0125	KEGG		KIN
																								HMBOX1		Positive epigenetic regulation of rRNA expression	109	6 (5.6%)	1.44e-06	1.2e-05	Reactome			KLF3		Viral carcinogenesis - Homo sapiens (human)	201	3 (1.5%)	0.00405	0.0143	KEGG		MAFF		gene ontology term	category,	set size	candidates	p-value
																								HMGB3		RNA Polymerase I Promoter Clearance	112	6 (5.4%)	1.69e-06	1.31e-05	Reactome			MITF		Mitophagy - animal - Homo sapiens (human)	65	2 (3.1%)	0.00496	0.0157	KEGG		NFIX			level		contained
																								HNF1A		RNA Polymerase I Transcription	114	6 (5.3%)	1.87e-06	1.36e-05	Reactome			MRPL28		Non-small cell lung cancer - Homo sapiens (human)	66	2 (3.0%)	0.00511	0.0157	KEGG		NFYA		GO:0003700 DNA binding transcription factor activity	MF 2	1568	15 (1.0%)	1.12e-13
																								JUN		RMTs methylate histone arginines	74	5 (6.8%)	4.45e-06	3.03e-05	Reactome			NOC3L		Glioma - Homo sapiens (human)	71	2 (2.8%)	0.00589	0.0163	KEGG		NFYC		GO:1901363 heterocyclic compound binding	MF 2	6038	19 (0.3%)	2.55e-10
																								KLF13		ERCC6 (CSB) and EHMT2 (G9a) positively regulate rRNA expression	79	5 (6.4%)	5.77e-06	3.7e-05	Reactome			NR2C2		Pancreatic cancer - Homo sapiens (human)	75	2 (2.7%)	0.00655	0.0163	KEGG		ONECUT2		GO:0097159 organic cyclic compound binding	MF 2	6124	19 (0.3%)	3.34e-10
																								MTA1		HDACs deacetylate histones	94	5 (5.3%)	1.44e-05	8.73e-05	Reactome			NRF1		Transcriptional regulation by RUNX2	75	2 (2.7%)	0.00655	0.0163	Reactome		RREB1		GO:0009058 biosynthetic process	BP 2	6596	19 (0.3%)	1.39e-09
																								MTA2		Hepatocellular carcinoma - Homo sapiens (human)	168	6 (3.6%)	1.85e-05	0.000106	KEGG			RB1		Generic Transcription Pathway	1106	6 (0.5%)	0.00674	0.0163	Reactome		SOX4		GO:0043233 organelle lumen	CC 2	5241	17 (0.3%)	2.24e-08
																								MTA3		Transcriptional regulation by RUNX1	198	6 (3.1%)	4.4e-05	0.00024	Reactome			RUNX1		HTLV-I infection - Homo sapiens (human)	255	3 (1.2%)	0.00785	0.0181	KEGG		ZBTB45		GO:0000988 transcription factor activity, protein binding	MF 2	655	8 (1.2%)	9.36e-08
																								NFIA		RNA Polymerase III Transcription Termination	24	3 (13.0%)	5.87e-05	0.000305	Reactome			RYBP		Pathways in cancer - Homo sapiens (human)	526	4 (0.8%)	0.00948	0.0207	KEGG		ZFP187		GO:0005667 transcription factor complex	CC 2	349	6 (1.7%)	7.52e-07
																								NFIB		PIP3 activates AKT signaling	213	6 (2.8%)	7e-05	0.000347	Reactome			TBX3		Small cell lung cancer - Homo sapiens (human)	93	2 (2.2%)	0.00992	0.0207	KEGG		ZFP207		GO:0006807 nitrogen compound metabolic process	BP 2	10333	19 (0.2%)	7.06e-06
																								NFIC		Regulation of TP53 Activity through Acetylation	30	3 (10.0%)	0.000132	0.000627	Reactome			ZBTB44									ZFP422		GO:0044238 primary metabolic process	BP 2	10852	19 (0.2%)	1.79e-05
																								NFIL3		Intracellular signaling by second messengers	244	6 (2.5%)	0.000148	0.000671	Reactome			ZBTB7A									ZFP771		GO:0044237 cellular metabolic process	BP 2	10884	19 (0.2%)	1.89e-05
																								NFRKB		RNA Polymerase III Abortive And Retractive Initiation	42	3 (7.3%)	0.000339	0.00142	Reactome			ZFP384											GO:0071704 organic substance metabolic process	BP 2	11202	19 (0.2%)	3.28e-05
																								NR5A2		RNA Polymerase III Transcription	42	3 (7.3%)	0.000339	0.00142	Reactome			ZHX2											GO:0044446 intracellular organelle part	CC 2	9172	17 (0.2%)	0.000171
																								PDS5B		Transcriptional regulation by RUNX3	52	3 (5.9%)	0.000647	0.00261	Reactome			ZHX3		gene ontology term	category,	set size	candidates	p-value	q-value				GO:0043227 membrane-bounded organelle	CC 2	12746	19 (0.1%)	0.000384
																								RBPJ		keratinocyte differentiation	53	3 (5.7%)	0.000724	0.00282	BioCarta						level		contained						GO:0043229 intracellular organelle	CC 2	12763	19 (0.1%)	0.000395
																								RFX5		mapkinase signaling pathway	57	3 (5.3%)	0.000896	0.00337	BioCarta					GO:0003700 DNA binding transcription factor activity	MF 2	1568	23 (1.5%)	8.47e-22	9.32e-21				GO:0014009 glial cell proliferation	BP 2	34	2 (5.9%)	0.00051
																								SALL1		Thermogenesis - Homo sapiens (human)	229	5 (2.2%)	0.000947	0.00344	KEGG					GO:1901363 heterocyclic compound binding	MF 2	6038	27 (0.4%)	2.3e-14	1.24e-13				GO:0048869 cellular developmental process	BP 2	4298	11 (0.3%)	0.000833
																								SMAD3		SMAD2/SMAD3:SMAD4 heterotrimer regulates transcription	25	2 (8.0%)	0.00311	0.011	Reactome					GO:0097159 organic cyclic compound binding	MF 2	6124	27 (0.4%)	3.37e-14	1.24e-13				GO:0050789 regulation of biological process	BP 2	11645	18 (0.2%)	0.000927
																								SMARCA5		Maturity onset diabetes of the young - Homo sapiens (human)	26	2 (7.7%)	0.00337	0.0115	KEGG					GO:0009058 biosynthetic process	BP 2	6596	27 (0.4%)	2.56e-13	1.33e-11				GO:0003682 chromatin binding	MF 2	544	4 (0.7%)	0.00176
																								SMARCC1		DNA Damage Recognition in GG-NER	38	2 (5.3%)	0.0071	0.0228	Reactome					GO:0006807 nitrogen compound metabolic process	BP 2	10333	27 (0.3%)	4.77e-08	1.24e-06				GO:0044424 intracellular part	CC 2	14559	19 (0.1%)	0.00479
																								SMARCC2		Transcriptional activity of SMAD2/SMAD3:SMAD4 heterotrimer	38	2 (5.3%)	0.0071	0.0228	Reactome					GO:0043233 organelle lumen	CC 2	5241	21 (0.4%)	6.3e-08	8.82e-07				GO:0005622 intracellular	CC 2	14838	19 (0.1%)	0.00688
																								SMARCE1		Signaling by NOTCH3	44	2 (4.5%)	0.00943	0.0294	Reactome					GO:0000988 transcription factor activity, protein binding	MF 2	655	9 (1.4%)	1.57e-07	4.32e-07				GO:0006950 response to stress	BP 2	3998	9 (0.2%)	0.00847
																								SP1												GO:0044238 primary metabolic process	BP 2	10852	27 (0.2%)	1.79e-07	2.51e-06				GO:0009653 anatomical structure morphogenesis	BP 2	2564	7 (0.3%)	0.00864
																								SP2												GO:0044237 cellular metabolic process	BP 2	10884	27 (0.2%)	1.93e-07	2.51e-06
																								TEAD1												GO:0071704 organic substance metabolic process	BP 2	11202	27 (0.2%)	4.22e-07	4.39e-06
																								TERF2												GO:0003682 chromatin binding	MF 2	544	7 (1.3%)	7.62e-06	1.68e-05
																								TERF2IP		gene ontology term	category,	set size	candidates	p-value	q-value					GO:0043227 membrane-bounded organelle	CC 2	12746	27 (0.2%)	1.4e-05	6.77e-05				complex name	set size	candidates	p-value	q-value
																								TFAM			level		contained							GO:0043229 intracellular organelle	CC 2	12763	27 (0.2%)	1.45e-05	6.77e-05						contained
																								TOX4		GO:0003700 DNA binding transcription factor activity	MF 2	1568	39 (2.5%)	3.76e-32	5.64e-31					GO:0050789 regulation of biological process	BP 2	11645	26 (0.2%)	2.27e-05	0.000197				NFYA,NFYC	2	2 (100.0%)	2.28e-06	1.82e-05
																								UBP1		GO:1901363 heterocyclic compound binding	MF 2	6038	51 (0.8%)	5.82e-25	4.36e-24					GO:0005667 transcription factor complex	CC 2	349	5 (1.4%)	0.00011	0.000386				ELF1 and HMGA1 form a complex with IL2RA promoter	3	2 (66.7%)	6.82e-06	1.82e-05
																								UBTF		GO:0097159 organic cyclic compound binding	MF 2	6124	51 (0.8%)	1.2e-24	5.98e-24					GO:0048869 cellular developmental process	BP 2	4298	15 (0.3%)	0.000177	0.00132				NF-Y	3	2 (66.7%)	6.82e-06	1.82e-05
																								VEZF1		GO:0009058 biosynthetic process	BP 2	6596	51 (0.8%)	5.37e-23	3.87e-21					GO:0009719 response to endogenous stimulus	BP 2	1596	9 (0.6%)	0.000214	0.00139				p32-CBF-DNA complex	4	2 (50.0%)	1.36e-05	2.18e-05
																								WIZ		GO:0003682 chromatin binding	MF 2	544	21 (3.9%)	1.8e-19	6.75e-19					GO:0005515 protein binding	MF 2	11696	25 (0.2%)	0.000228	0.000417				p53 (tetramer)/NF-Y	4	2 (50.0%)	1.36e-05	2.18e-05
																								YBX1		GO:0043233 organelle lumen	CC 2	5241	44 (0.8%)	7.26e-18	1.52e-16					GO:0044446 intracellular organelle part	CC 2	9172	22 (0.2%)	0.000315	0.000882				MYC/Max/NF-Y	5	2 (40.0%)	2.27e-05	2.59e-05
																								YY1		GO:0006807 nitrogen compound metabolic process	BP 2	10333	52 (0.5%)	7.69e-15	2.77e-13					GO:0048856 anatomical structure development	BP 2	5749	17 (0.3%)	0.00037	0.00214				SREBP1A,1C:NF-Y:GPAM gene	5	2 (40.0%)	2.27e-05	2.59e-05
																								ZBTB20		GO:0017053 transcriptional repressor complex	CC 2	85	10 (11.8%)	2.26e-14	2.38e-13					GO:0007275 multicellular organism development	BP 2	5261	16 (0.3%)	0.000483	0.00251				SREBP1A,1C:NF-Y:SP1:FASN gene
																								ZFHX3		GO:0000988 transcription factor activity, protein binding	MF 2	655	18 (2.8%)	4.33e-14	1.3e-13					GO:0044424 intracellular part	CC 2	14559	27 (0.2%)	0.000505	0.00118
																								ZFP148		GO:0044238 primary metabolic process	BP 2	10852	52 (0.5%)	9.88e-14	2.06e-12					GO:0005622 intracellular	CC 2	14838	27 (0.2%)	0.000844	0.00169
																								ZFP512		GO:0044237 cellular metabolic process	BP 2	10884	52 (0.5%)	1.14e-13	2.06e-12					GO:0004879 nuclear receptor activity	MF 2	49	2 (4.1%)	0.00215	0.00337
																								ZNF512B		GO:0071704 organic substance metabolic process	BP 2	11202	52 (0.5%)	5.15e-13	7.42e-12					GO:0032922 circadian regulation of gene expression	BP 2	56	2 (3.6%)	0.0027	0.0128
																										GO:0050789 regulation of biological process	BP 2	11645	52 (0.4%)	3.93e-12	4.72e-11					GO:0008219 cell death	BP 2	2208	8 (0.4%)	0.00868	0.0376
																								54		GO:0043228 non-membrane-bounded organelle	CC 2	4194	33 (0.8%)	1.07e-10	7.48e-10			28		GO:0072089 stem cell proliferation	BP 2	107	2 (1.9%)	0.00985	0.0394		25
																										GO:0043227 membrane-bounded organelle	CC 2	12746	52 (0.4%)	4.39e-10	1.99e-09
																										GO:0043229 intracellular organelle	CC 2	12763	52 (0.4%)	4.73e-10	1.99e-09
																										GO:0005667 transcription factor complex	CC 2	349	11 (3.2%)	1.83e-09	6.4e-09
																										GO:0044446 intracellular organelle part	CC 2	9172	44 (0.5%)	3.2e-08	9.59e-08
																										GO:0044424 intracellular part	CC 2	14559	52 (0.4%)	4.42e-07	1.16e-06
																										GO:0005622 intracellular	CC 2	14838	52 (0.4%)	1.19e-06	2.78e-06
																										GO:1902494 catalytic complex	CC 2	1433	15 (1.0%)	3.54e-06	7.44e-06
																										GO:0005515 protein binding	MF 2	11696	46 (0.4%)	9.46e-06	2.36e-05
																										GO:0016043 cellular component organization	BP 2	6340	31 (0.5%)	6.85e-05	0.000704
																										GO:0044877 protein-containing complex binding	MF 2	906	10 (1.1%)	0.000133	0.000286
																										GO:0007275 multicellular organism development	BP 2	5261	27 (0.5%)	0.000144	0.00129
																										GO:0030870 Mre11 complex	CC 2	7	2 (28.6%)	0.00015	0.000286
																										GO:0009719 response to endogenous stimulus	BP 2	1596	13 (0.8%)	0.000246	0.00193
																										GO:0009653 anatomical structure morphogenesis	BP 2	2564	17 (0.7%)	0.000268	0.00193
																										GO:0003006 developmental process involved in reproduction	BP 2	669	8 (1.2%)	0.000402	0.00244
																										GO:0048646 anatomical structure formation involved in morphogenesis	BP 2	1039	10 (1.0%)	0.000406	0.00244
																										GO:0048856 anatomical structure development	BP 2	5749	27 (0.5%)	0.000697	0.00386
																										GO:0048869 cellular developmental process	BP 2	4298	22 (0.5%)	0.000996	0.00512
																										GO:0007623 circadian rhythm	BP 2	198	4 (2.0%)	0.00198	0.00949
																										GO:0032993 protein-DNA complex	CC 2	202	4 (2.0%)	0.00213	0.00372
																										GO:0050673 epithelial cell proliferation	BP 2	372	5 (1.3%)	0.00326	0.0138
																										GO:0002520 immune system development	BP 2	931	8 (0.9%)	0.00327	0.0138
																										GO:0048589 developmental growth	BP 2	584	6 (1.0%)	0.00478	0.0191
																										GO:0007622 rhythmic behavior	BP 2	45	2 (4.4%)	0.0066	0.025
																										GO:0019827 stem cell population maintenance	BP 2	154	3 (1.9%)	0.00838	0.0297
																										GO:0098727 maintenance of cell number	BP 2	156	3 (1.9%)	0.00868	0.0297
																										GO:0032922 circadian regulation of gene expression	BP 2	56	2 (3.6%)	0.00974	0.0308
																										GO:0044419 interspecies interaction between organisms	BP 2	893	7 (0.8%)	0.00982	0.0308
																										complex name	set size	candidates	p-value	q-value	complex source
																												contained
																										LARC complex (LCR-associated remodeling complex)	19	6 (31.6%)	6.62e-11	6.02e-09	CORUM
																										SWI/SNF	11	5 (45.5%)	3.34e-10	1.52e-08	PINdb
																										BAF complex	13	5 (38.5%)	9.26e-10	2.81e-08	CORUM
																										DPF3	14	5 (35.7%)	1.44e-09	3.27e-08	PINdb
																										Fl-BAF57	18	5 (27.8%)	6.08e-09	1.11e-07	PINdb
																										Fl-BAF45	19	5 (26.3%)	8.23e-09	1.25e-07	PINdb
																										hSWI/SNF	8	4 (50.0%)	1.44e-08	1.64e-07	BioCarta
																										BAF complex	8	4 (50.0%)	1.44e-08	1.64e-07	CORUM
																										BAF complex	9	4 (44.4%)	2.58e-08	1.68e-07	CORUM
																										NUMAC	9	4 (44.4%)	2.58e-08	1.68e-07	PINdb
																										BAF complex	9	4 (44.4%)	2.58e-08	1.68e-07	CORUM
																										Brm-associated complex	9	4 (44.4%)	2.58e-08	1.68e-07	CORUM
																										BAF complex	9	4 (44.4%)	2.58e-08	1.68e-07	CORUM
																										BRG1-associated complex	9	4 (44.4%)	2.58e-08	1.68e-07	CORUM
																										RSmad complex	10	4 (40.0%)	4.29e-08	1.7e-07	CORUM
																										BAF	10	4 (40.0%)	4.29e-08	1.7e-07	PINdb
																										glucocorticoid/glucocorticoid receptor/glucocorticoid/glucocorticoid receptor/hSWI/SNF	10	4 (40.0%)	4.29e-08	1.7e-07	BioCarta
																										NUMAC complex (nucleosomal methylation activator complex)	10	4 (40.0%)	4.29e-08	1.7e-07	CORUM
																										SWI-SNF chromatin remodeling-related-BRCA1 complex	10	4 (40.0%)	4.29e-08	1.7e-07	CORUM
																										EBAFa complex	10	4 (40.0%)	4.29e-08	1.7e-07	CORUM
																										BRM-associated complex	10	4 (40.0%)	4.29e-08	1.7e-07	CORUM
																										Fl-Brg1	10	4 (40.0%)	4.29e-08	1.7e-07	PINdb
																										EBAFb complex	10	4 (40.0%)	4.29e-08	1.7e-07	CORUM
																										BRG1-SIN3A-HDAC containing SWI/SNF remodeling complex I	11	4 (36.4%)	6.73e-08	2.36e-07	CORUM
																										SWI/SNF-A	11	4 (36.4%)	6.73e-08	2.36e-07	PINdb
																										EBAFb	11	4 (36.4%)	6.73e-08	2.36e-07	PINdb
																										BRM-SIN3A-HDAC complex	12	4 (33.3%)	1.01e-07	3.39e-07	CORUM
																										RXR/VDR/WSTF/WINAC	13	4 (30.8%)	1.45e-07	4.71e-07	BioCarta
																										BRG1-SIN3A complex	14	4 (28.6%)	2.02e-07	6.14e-07	CORUM
																										WINAC complex	14	4 (28.6%)	2.02e-07	6.14e-07	CORUM
																										BRM-SIN3A complex	15	4 (26.7%)	2.75e-07	8.08e-07	CORUM
																										Brg1-associated complex II	7	3 (42.9%)	1.98e-06	5.45e-06	CORUM
																										p300-CBP-p270-SWI/SNF complex	7	3 (42.9%)	1.98e-06	5.45e-06	CORUM
																										GST-Smad2	8	3 (37.5%)	3.15e-06	8.44e-06	PINdb
																										ALL-1 supercomplex	28	4 (14.3%)	3.98e-06	1.01e-05	CORUM
																										ALL-1	28	4 (14.3%)	3.98e-06	1.01e-05	PINdb
																										RNA polymerase II complex, chromatin structure modifying	9	3 (33.3%)	4.72e-06	1.13e-05	CORUM
																										PBAF complex (Polybromo- and BAF containing complex)	9	3 (33.3%)	4.72e-06	1.13e-05	CORUM
																										PBAF complex (Polybromo- and BAF containing complex)	10	3 (30.0%)	6.72e-06	1.42e-05	CORUM
																										PBAF complex (Polybromo- and BAF containing complex)	10	3 (30.0%)	6.72e-06	1.42e-05	CORUM
																										GST-Smad3	10	3 (30.0%)	6.72e-06	1.42e-05	PINdb
																										NuRD/MBD2 Complex (MeCP1)	10	3 (30.0%)	6.72e-06	1.42e-05	PID
																										NuRD/MBD3 Complex	10	3 (30.0%)	6.72e-06	1.42e-05	PID
																										SWI/SNF-B	11	3 (27.3%)	9.22e-06	1.82e-05	PINdb
																										NuRD Complex	11	3 (27.3%)	9.22e-06	1.82e-05	PID
																										NuRD/MBD3/MBD3L2 Complex	11	3 (27.3%)	9.22e-06	1.82e-05	PID
																										PBAF	12	3 (25.0%)	1.23e-05	2.28e-05	PINdb
																										NuRD/MBD3 Complex/GATA1/Fog1	12	3 (25.0%)	1.23e-05	2.28e-05	PID
																										NuRD/MBD2/PRMT5 Complex	12	3 (25.0%)	1.23e-05	2.28e-05	PID
																										TRF2-Rap1 complex III	2	2 (100.0%)	1.52e-05	2.77e-05	CORUM
																										PBAF.2	13	3 (23.1%)	1.59e-05	2.83e-05	PINdb
																										SIN3-ING1b complex II	16	3 (18.8%)	3.09e-05	5.3e-05	CORUM
																										SNF2h-cohesin-NuRD complex	16	3 (18.8%)	3.09e-05	5.3e-05	CORUM
																										SNF2h/cohesin	17	3 (17.6%)	3.74e-05	6.3e-05	PINdb
																										YY1-Notch1-RBP-Jkappa complex	3	2 (66.7%)	4.56e-05	7.28e-05	CORUM
																										SMAD3-SMAD4-cJUN complex	3	2 (66.7%)	4.56e-05	7.28e-05	CORUM
																										SMAD3/SMAD4/SP1	3	2 (66.7%)	4.56e-05	7.28e-05	PID
																										E2/ERA (dimer)/JUN/HSF2/CEBPB	4	2 (50.0%)	9.09e-05	0.000133	PID
																										SMAD3/SMAD4/JUN/FOS	4	2 (50.0%)	9.09e-05	0.000133	PID
																										Brg1-based SWI/SNF chromatin remodeling complex	4	2 (50.0%)	9.09e-05	0.000133	CORUM
																										BRG1/BAF155/BAF170/BAF60A	4	2 (50.0%)	9.09e-05	0.000133	PID
																										TRF2-Rap1 complex II	4	2 (50.0%)	9.09e-05	0.000133	CORUM
																										HIF1A/ARNT/SMAD3/SMAD4/SP1	5	2 (40.0%)	0.000151	0.000208	PID
																										cortisol/GR alpha/BRG1/BAF155/BAF170/BAF60A	5	2 (40.0%)	0.000151	0.000208	PID
																										MRN complex/TRF2/Rap1	5	2 (40.0%)	0.000151	0.000208	PID
																										Mi-2/NuRD-MTA2 complex	5	2 (40.0%)	0.000151	0.000208	CORUM
																										TRF-Rap1 complex I, 2MD	6	2 (33.3%)	0.000226	0.000303	CORUM
																										Shelterin complex	6	2 (33.3%)	0.000226	0.000303	Reactome
																										Rap1 complex	7	2 (28.6%)	0.000316	0.000394	CORUM
																										TERF2-RAP1 complex	7	2 (28.6%)	0.000316	0.000394	CORUM
																										Rap1 complex	7	2 (28.6%)	0.000316	0.000394	CORUM
																										NuRD.1	7	2 (28.6%)	0.000316	0.000394	PINdb
																										HDAC2-asscociated core complex	7	2 (28.6%)	0.000316	0.000394	CORUM
																										RNA polymerase II complex, incomplete (CDK8 complex), chromatin structure modifying	8	2 (25.0%)	0.00042	0.000497	CORUM
																										TRF2.RAP1	8	2 (25.0%)	0.00042	0.000497	PINdb
																										NuRD.1 complex	8	2 (25.0%)	0.00042	0.000497	CORUM
																										NuRD.2	8	2 (25.0%)	0.00042	0.000497	PINdb
																										N-CoR-1	9	2 (22.2%)	0.000539	0.000613	PINdb
																										HDAC1-associated core complex cII	9	2 (22.2%)	0.000539	0.000613	CORUM
																										MeCP1 complex	9	2 (22.2%)	0.000539	0.000613	CORUM
																										NCOR1 complex	10	2 (20.0%)	0.000672	0.000755	CORUM
																										INO80 complex	14	2 (14.3%)	0.00135	0.00146	Reactome
																										Sin3-CI	14	2 (14.3%)	0.00135	0.00146	PINdb
																										emerin C32	14	2 (14.3%)	0.00135	0.00146	PINdb
																										UCHL5:INO80 complex	15	2 (13.3%)	0.00155	0.00164	Reactome
																										Polycomb repressive complex 1 (PRC1, hPRC-H)	15	2 (13.3%)	0.00155	0.00164	CORUM
																										INO80.complex	16	2 (12.5%)	0.00177	0.00183	Spike
																										RNA polymerase II complex, chromatin structure modifying	16	2 (12.5%)	0.00177	0.00183	CORUM
																										Anti-HDAC2 complex	17	2 (11.8%)	0.002	0.00202	CORUM
																										HDAC2	17	2 (11.8%)	0.002	0.00202	PINdb
																										Emerin complex 32	31	2 (6.5%)	0.00659	0.00659	CORUM
[truncated: 1 more columns]
