# Supplementary material for: Identification of Insulin-Responsive Transcription Factors That Regulate Glucose Production by Hepatocytes
Source: Oxford University Press journal article supplement (doi:10.2337/db18-1236), 2019-04-01
Supplement: db181236supplementarydata6.xlsx [file db181236supplementarydata6.xlsx]

## Sheet: G6pcp #1 insulin
						sum-90069	sum-90070	sum-90071	sum-90072
	Gene name		# Peptides	# PSMs	# Unique Peptides	NC	No Tx	Dex/cAMP	D/C/I	No Tx	Dex/cAMP	D/C/I	D/C/I to D/C
gi113205057	UBTF	High mobility group, HMG1/HMG2|High mobility group, superfamily	23	102	23	8.43205e+07	4.62592e+07	4.97045e+07	3.88063e+07	0	0	0	#DIV/0!
gi20806532	CSDA	Cold-shock conserved site|Cold-shock protein, DNA-binding|Cold shock protein|Nucleic acid-binding, OB-fold|Nucleic acid-binding, OB-fold-like	11	74	4	7.14679e+06	9.0013e+06	2.89128e+06	5.78631e+06	1.85451e+06	0	0	#DIV/0!
gi110347410	CEBPD	Basic-leucine zipper (bZIP) transcription factor|Basic leucine zipper|CCAAT/enhancer-binding	2	3	1	0	5.39776e+06	0	0	5.39776e+06	0	0	#DIV/0!
gi19745144	CREB1	Coactivator CBP, pKID|Basic-leucine zipper (bZIP) transcription factor|bZIP transcription factor, bZIP-1|cAMP response element binding (CREB) protein	1	2	1	0	6.63816e+06	0	0	6.63816e+06	0	0	#DIV/0!
gi110835729	CUX1	Homeobox, conserved site|Homeobox|Homeodomain protein CUT|Homeodomain-like|Homeodomain-related|CASP, C-terminal	1	1	1	0	0	0	0	0	0	0	#DIV/0!
gi6681129	DACH1	Putative DNA binding domain|Transforming protein Ski	1	1	1	0	0	0	0	0	0	0	#DIV/0!
gi33859684	KIN	Zinc finger, C2H2-like|DNA/RNA-binding protein Kin17, conserved region	1	2	1	0	6.07008e+06	0	0	6.07008e+06	0	0	#DIV/0!
gi6680257	HOXD11	Homeobox, conserved site|Homeobox|Homeodomain-like|Homeodomain-related|Protein of unknown function DUF3528|Homeobox, region	1	1	1	0	0	0	0	0	0	0	#DIV/0!
gi6680512	JUNB	Basic-leucine zipper (bZIP) transcription factor|Jun-like transcription factor|Eukaryotic transcription factor, Skn-1-like, DNA-binding|bZIP transcription factor, bZIP-1|Transcription factor Jun	1	1	1	0	1.70092e+06	0	0	1.70092e+06	0	0	#DIV/0!
gi6754404	JUND	Basic-leucine zipper (bZIP) transcription factor|Jun-like transcription factor|Eukaryotic transcription factor, Skn-1-like, DNA-binding|bZIP transcription factor, bZIP-1|Transcription factor Jun	1	1	1	0	0	0	0	0	0	0	#DIV/0!
gi28893511	ZFP771	Zinc finger, C2H2-type|Zinc finger, C2H2-type/integrase, DNA-binding|Zinc finger, C2H2-like	1	1	1	0	0	0	0	0	0	0	#DIV/0!
gi12963557	DMAP1	SANT, DNA-binding|DNA methyltransferase 1-associated 1	1	2	1	0	0	0	0	0	0	0	#DIV/0!
gi84872227	MIER1	ELM2|SANT, DNA-binding|Homeodomain-like|SANT, eukarya	1	1	1	0	2.87714e+06	0	0	2.87714e+06	0	0	#DIV/0!
gi47458804	STAT3	SH2 motif|p53-like transcription factor, DNA-binding|EF-hand-like domain|STAT transcription factor, DNA-binding, subdomain|STAT transcription factor, protein interaction|STAT transcription factor, all-alpha|STAT transcription factor, DNA-binding|STAT transcription factor, coiled coil|STAT transcription factor, core	1	1	1	0	1.10327e+06	0	0	1.10327e+06	0	0	#DIV/0!
gi111154070	TTF1	SANT, DNA-binding|MYB-like|Myb transcription factor	1	1	1	0	0	0	0	0	0	0	#DIV/0!
gi31543944	VDR	Nuclear hormone receptor, ligand-binding, core|Zinc finger, nuclear hormone receptor-type|Nuclear hormone receptor, ligand-binding|Zinc finger, NHR/GATA-type|Vitamin D receptor|Steroid hormone receptor	1	1	1	0	2.42667e+06	0	0	2.42667e+06	0	0	#DIV/0!
gi113205067	ZFX	Transcriptional activator, Zfx / Zfy domain|Zinc finger, C2H2-type|Zinc finger, C2H2-type/integrase, DNA-binding|Zinc finger, C2H2-like	1	1	1	0	694232	0	0	694232	0	0	#DIV/0!
gi161760658	ZFP189	Krueppel-associated box|Zinc finger, C2H2-type|Zinc finger, C2H2-type/integrase, DNA-binding|Zinc finger, C2H2-like	1	2	1	0	0	0	0	0	0	0	#DIV/0!
gi133778915	HMGN5	High mobility group protein HMG14/HMG17	1	2	1	996510	3.30927e+06	0	0	2.31276e+06	0	0	#DIV/0!
gi144922690	KLF16	Zinc finger, C2H2-type|Zinc finger, C2H2-type/integrase, DNA-binding|Zinc finger, C2H2-like	2	2	2	0	2.28868e+06	0	0	2.28868e+06	0	0	#DIV/0!
gi161169027	RUNX1	p53-like transcription factor, DNA-binding|p53/RUNT-type transcription factor, DNA-binding domain|Acute myeloid leukemia 1 (AML 1)/Runt|Runx inhibition|Acute myeloid leukemia 1 protein (AML 1)/Runt|Transcription factor, Runt-related, RUNX	1	1	1	0	720571	0	0	720571	0	0	#DIV/0!
gi21313424	DRAP1	Transcription factor CBF/NF-Y/archaeal histone|Histone-fold	2	3	2	0	2.18634e+07	9.30885e+06	0	2.18634e+07	9.30885e+06	0	0
gi31077096	ID1	Helix-loop-helix DNA-binding domain|Helix-loop-helix DNA-binding	1	1	1	0	0	3.58355e+06	0	0	3.58355e+06	0	0
gi188528630	RB1	Retinoblastoma-associated protein, B-box|Retinoblastoma-associated protein, A-box|Cyclin|Cyclin-like|Cyclin-related|Rb C-terminal|Retinoblastoma-associated protein	1	1	1	0	0	1.11617e+06	0	0	1.11617e+06	0	0
gi159032064	SALL1	Zinc finger, C2H2-type|Zinc finger, C2H2-type/integrase, DNA-binding|Zinc finger, C2H2-like	3	3	3	0	1.41636e+06	3.49926e+06	0	1.41636e+06	3.49926e+06	0	0
gi56118239	SOX4	High mobility group, HMG1/HMG2|High mobility group, superfamily|SOX-12/11/4a	2	3	2	0	506091	308652	0	506091	308652	0	0
gi119226255	SP1	Zinc finger, C2H2-type|Zinc finger, C2H2-type/integrase, DNA-binding|Zinc finger, C2H2-like	2	3	2	0	3.04998e+06	715597	0	3.04998e+06	715597	0	0
gi218931192	TCF7L2	High mobility group, HMG1/HMG2|High mobility group, superfamily|CTNNB1 binding, N-teminal	2	6	2	0	4.36947e+06	2.04205e+06	0	4.36947e+06	2.04205e+06	0	0
gi6679627	ELF1	Ets|Winged helix-turn-helix transcription repressor DNA-binding|Transcription factor Elf-1, N-terminal	3	7	3	0	6.39494e+06	4.78907e+06	1.32148e+06	6.39494e+06	4.78907e+06	1.32148e+06	0.275937
gi94400775	RBPJ	Cell surface receptor IPT/TIG|p53-like transcription factor, DNA-binding|Immunoglobulin-like fold|Immunoglobulin E-set|Beta-trefoil|LAG1, DNA binding	6	15	6	0	9.45046e+06	1.97216e+07	5.75309e+06	9.45046e+06	1.97216e+07	5.75309e+06	0.291716
gi28076891	ZFP422	Zinc finger, C2H2-type|Zinc finger, C2H2-type/integrase, DNA-binding|Zinc finger, C2H2-like	3	7	3	0	7.9894e+06	1.36091e+07	4.2065e+06	7.9894e+06	1.36091e+07	4.2065e+06	0.309095
gi110225364	ZFHX3	Homeobox, conserved site|Homeobox|Zinc finger, U1-type|Zinc finger, C2H2-type|Homeodomain-like|Homeodomain-related|Zinc finger, C2H2-type/integrase, DNA-binding|Zinc finger, C2H2-like	10	19	10	0	5.02161e+06	1.27849e+07	4.10174e+06	5.02161e+06	1.27849e+07	4.10174e+06	0.320827
gi91598896	MTA1	Zinc finger, GATA-type|ELM2|SANT, DNA-binding|Bromo adjacent homology (BAH) domain|Homeodomain-like|SANT, eukarya	6	15	3	0	3.56728e+06	1.75681e+06	675971	3.56728e+06	1.75681e+06	675971	0.384772
gi31542626	HMBOX1	Homeobox|Hepatocyte nuclear factor 1, N-terminal|Homeodomain-like|Lambda repressor-like, DNA-binding|Homeodomain-related	11	31	10	0	4.63481e+07	1.22638e+07	4.94176e+06	4.63481e+07	1.22638e+07	4.94176e+06	0.402956
gi31982421	YY1	Zinc finger, C2H2-type|Zinc finger, C2H2-type/integrase, DNA-binding|Zinc finger, C2H2-like|Transcription factor yin/yang	5	12	5	798497	3.79906e+06	2.46063e+06	1.49088e+06	3.00056e+06	1.66213e+06	692383	0.416564
gi254553392	ZFP512	Zinc finger, C2H2-type|Zinc finger, C2H2-like	11	37	11	1.34564e+06	1.19702e+07	1.47578e+07	7.66179e+06	1.06246e+07	1.34121e+07	6.31615e+06	0.470928
gi119220568	ONECUT2	Homeobox|Homeodomain protein CUT|Homeodomain-like|Homeodomain-related	9	36	6	0	4.79907e+07	4.57757e+07	2.15929e+07	4.79907e+07	4.57757e+07	2.15929e+07	0.471711
gi171846256	NFIA	CTF transcription factor/nuclear factor 1, conserved site|MAD homology 1, Dwarfin-type|CTF transcription factor/nuclear factor 1, DNA-binding domain|CTF transcription factor/nuclear factor 1|CTF transcription factor/nuclear factor 1, N-terminal	14	77	11	1.48367e+06	2.7584e+07	5.38514e+07	2.64331e+07	2.61004e+07	5.23677e+07	2.49495e+07	0.476428
gi239835744	TCFEB	Helix-loop-helix DNA-binding domain|Helix-loop-helix DNA-binding|Protein of unknown function DUF3371	6	17	4	0	2.74353e+06	3.56415e+06	1.7949e+06	2.74353e+06	3.56415e+06	1.7949e+06	0.503598
gi14010847	NR5A2	Nuclear hormone receptor, ligand-binding, core|Zinc finger, nuclear hormone receptor-type|Nuclear hormone receptor, ligand-binding|Zinc finger, NHR/GATA-type|Vitamin D receptor|Steroid hormone receptor|Orphan nuclear receptor Fushi-tarazu factor 1	6	9	6	0	9.62077e+06	5.23279e+06	2.66984e+06	9.62077e+06	5.23279e+06	2.66984e+06	0.510213
gi145553997	ARID1B	ARID/BRIGHT DNA-binding domain|Protein of unknown function DUF3518	4	7	3	0	3.77103e+06	7.38791e+06	3.8096e+06	3.77103e+06	7.38791e+06	3.8096e+06	0.515654
gi166295202	HNF1A	Homeobox|Hepatocyte nuclear factor 1, beta isoform, C-terminal|Hepatocyte nuclear factor 1, alpha isoform C-terminal|Hepatocyte nuclear factor 1, N-terminal|Homeodomain-like|Lambda repressor-like, DNA-binding|Homeodomain-related	9	30	8	0	9.58077e+06	1.27485e+07	6.66378e+06	9.58077e+06	1.27485e+07	6.66378e+06	0.52271
gi71037397	RFX5	DNA-binding RFX|Winged helix-turn-helix transcription repressor DNA-binding	6	10	6	0	3.18142e+06	2.99575e+06	1.5765e+06	3.18142e+06	2.99575e+06	1.5765e+06	0.526246
gi166706891	TCF20	Zinc finger, PHD-type	6	10	6	0	6.51692e+06	3.68796e+06	2.08346e+06	6.51692e+06	3.68796e+06	2.08346e+06	0.564935
gi10181166	SMARCE1	High mobility group, HMG1/HMG2|High mobility group, superfamily	13	42	13	2.69211e+06	1.10632e+07	1.12556e+07	7.75555e+06	8.3711e+06	8.56351e+06	5.06344e+06	0.59128
gi21314854	GATAD2B	Zinc finger, GATA-type	7	18	7	0	6.25416e+06	7.17141e+06	4.28105e+06	6.25416e+06	7.17141e+06	4.28105e+06	0.596961
gi46909569	GATA4	Zinc finger, GATA-type|GATA-type transcription activator, N-terminal|Zinc finger, NHR/GATA-type|Transcription factor GATA-4/5/6	2	4	2	0	0	3.06012e+06	1.84321e+06	0	3.06012e+06	1.84321e+06	0.602333
gi6677853	NKX1-2	Homeobox, conserved site|Homeobox|Homeodomain-like|Homeodomain-related|Homeobox, region	1	6	1	0	1.07079e+08	1.40505e+08	8.64537e+07	1.07079e+08	1.40505e+08	8.64537e+07	0.615305
gi133904142	TERF2	SANT, DNA-binding|Homeodomain-like|Homeodomain-related|Telomere repeat-binding factor, dimerisation domain|Myb, DNA-binding|HTH transcriptional regulator, Myb-type, DNA-binding|Telomeric repeat-binding factor 1, Pin2	6	12	6	0	2.22484e+06	1.88639e+06	1.16903e+06	2.22484e+06	1.88639e+06	1.16903e+06	0.619721
gi166706895	TOX4	High mobility group, HMG1/HMG2, subgroup|High mobility group, HMG1/HMG2|High mobility group, superfamily	8	21	8	0	1.88287e+07	1.8992e+07	1.19745e+07	1.88287e+07	1.8992e+07	1.19745e+07	0.630502
gi158508460	AHCTF1	AT hook, DNA-binding motif	82	417	82	0	2.21978e+08	2.47875e+08	1.56324e+08	2.21978e+08	2.47875e+08	1.56324e+08	0.630657
gi40254124	SMARCA5	SNF2-related|SANT, DNA-binding|DNA/RNA helicase, C-terminal|Homeodomain-like|DEAD-like helicase, N-terminal|Helicase, superfamily 1/2, ATP-binding domain|ATPase, nucleosome remodelling ISWI, HAND domain|SLIDE|SANT, eukarya	37	118	37	6.6315e+06	8.32941e+07	1.02548e+08	6.84062e+07	7.66626e+07	9.59166e+07	6.17747e+07	0.644045
gi22779899	CDC5L	SANT, DNA-binding|Homeodomain-like|Homeodomain-related|Myb, DNA-binding|HTH transcriptional regulator, Myb-type, DNA-binding|Myb transcription factor|Protein of unknown function DUF3351	41	193	41	5.20497e+06	1.76315e+08	1.32562e+08	8.73117e+07	1.7111e+08	1.27357e+08	8.21067e+07	0.644697
gi126352391	ZFP384	Zinc finger, C2H2-type|Zinc finger, C2H2-type/integrase, DNA-binding|Zinc finger, C2H2-like	8	25	8	675692	9.51359e+06	9.09152e+06	6.18255e+06	8.8379e+06	8.41582e+06	5.50686e+06	0.654345
gi8393832	NFIL3	Basic-leucine zipper (bZIP) transcription factor|Vertebrate interleukin-3 regulated transcription factor|Basic leucine zipper|Transcription factor, basic leucine zipper, E4BP4	11	22	11	0	3.19434e+06	1.02394e+07	6.82153e+06	3.19434e+06	1.02394e+07	6.82153e+06	0.666203
gi31044459	CTCF	Zinc finger, C2H2-type|Zinc finger, C2H2-type/integrase, DNA-binding|Zinc finger, C2H2-like	4	10	4	0	1.36717e+07	1.24207e+07	8.36387e+06	1.36717e+07	1.24207e+07	8.36387e+06	0.67338
gi166235125	SMARCC2	Chromo domain|SANT, DNA-binding|BRCT|SWIRM|Homeodomain-like|Myb, DNA-binding|SANT, eukarya	19	49	14	0	6.30945e+08	36160087	2.45431e+07	6.30945e+08	36160087	2.45431e+07	0.678735
gi226437608	GCFC1	GC-rich sequence DNA-binding factor-like	6	16	6	0	1.57581e+07	7.27473e+06	4.98422e+06	1.57581e+07	7.27473e+06	4.98422e+06	0.685142
gi6679042	NFIC	CTF transcription factor/nuclear factor 1, conserved site|MAD homology 1, Dwarfin-type|CTF transcription factor/nuclear factor 1, DNA-binding domain|CTF transcription factor/nuclear factor 1|CTF transcription factor/nuclear factor 1, N-terminal	14	65	12	0	4.41086e+07	4.63279e+07	3.18345e+07	4.41086e+07	4.63279e+07	3.18345e+07	0.687156
gi117414176	VEZF1	Zinc finger, C2H2-type|Zinc finger, C2H2-type/integrase, DNA-binding|Zinc finger, C2H2-like	3	13	3	1.07874e+06	2.7648e+06	2.75753e+06	2.23304e+06	1.68606e+06	1.67879e+06	1.1543e+06	0.687581
gi257196201	ZBTB20	BTB/POZ-like|Zinc finger, C2H2-type|BTB/POZ fold|BTB/POZ|Zinc finger, C2H2-type/integrase, DNA-binding|Zinc finger, C2H2-like	18	127	16	0	1.60023e+08	1.77491e+08	1.28089e+08	1.60023e+08	1.77491e+08	1.28089e+08	0.721664
gi194328715	ZFP207	Zinc finger, C2H2-type|Zinc finger, C2H2-like	2	9	2	0	2.8232e+07	28723362	2.09238e+07	2.8232e+07	28723362	2.09238e+07	0.728458
gi134032032	UBP1	CP2 transcription factor|Sterile alpha motif homology	8	20	8	885341	1.0965e+07	9.5214e+06	7.32754e+06	1.00797e+07	8.63606e+06	6.4422e+06	0.745965
gi153792362	ELK4	Ets|Winged helix-turn-helix transcription repressor DNA-binding	5	10	5	0	1.66515e+07	8.62935e+06	6.58309e+06	1.66515e+07	8.62935e+06	6.58309e+06	0.762872
gi295424118	RREB1	Zinc finger, C2H2-type|Zinc finger, C2H2-type/integrase, DNA-binding|Zinc finger, C2H2-like	8	15	8	0	7.13562e+06	5.51391e+06	4.33466e+06	7.13562e+06	5.51391e+06	4.33466e+06	0.786131
gi262205246	TEAD1	TEA/ATTS|Transcriptional enhancer factor	7	20	7	0	6.74451e+06	1.36482e+07	1.0853e+07	6.74451e+06	1.36482e+07	1.0853e+07	0.795197
gi6756049	ZFP148	Zinc finger, C2H2-type|Zinc finger, C2H2-type/integrase, DNA-binding|Zinc finger, C2H2-like	5	10	5	0	4.49574e+06	2.67075e+06	2.12847e+06	4.49574e+06	2.67075e+06	2.12847e+06	0.796954
gi160948575	TERF2IP	Homeodomain-like|Homeodomain-related|Rap1 Myb	5	9	5	0	2.12038e+06	3.17146e+06	2.53628e+06	2.12038e+06	3.17146e+06	2.53628e+06	0.799721
gi163965420	NFIB	CTF transcription factor/nuclear factor 1, conserved site|MAD homology 1, Dwarfin-type|CTF transcription factor/nuclear factor 1, DNA-binding domain|CTF transcription factor/nuclear factor 1|CTF transcription factor/nuclear factor 1, N-terminal	10	45	7	1.61347e+06	2.88372e+07	2.75159e+07	2.32179e+07	2.72238e+07	2.59025e+07	2.16044e+07	0.834067
gi6754850	NFYB	Transcription factor, NFYB/HAP3, conserved site|Transcription factor CBF/NF-Y/archaeal histone|Histone-fold|Transcription factor, CBFA/NFYB, DNA topoisomerase	3	6	3	0	3.34317e+07	2.0719e+07	1.75148e+07	3.34317e+07	2.0719e+07	1.75148e+07	0.845351
gi114326538	NFYC	Transcription factor CBF/NF-Y/archaeal histone|Histone-fold	5	10	5	0	3.98069e+07	2.95791e+07	2.57845e+07	3.98069e+07	2.95791e+07	2.57845e+07	0.871711
gi61966683	CEBPG	Basic-leucine zipper (bZIP) transcription factor|Basic leucine zipper	5	17	5	0	3.24323e+07	3.22406e+07	2.96813e+07	3.24323e+07	3.22406e+07	2.96813e+07	0.920616
gi124249109	ARID1A	ARID/BRIGHT DNA-binding domain|Protein of unknown function DUF3518	7	16	6	0	13804581	3.26769e+06	3.15087e+06	13804581	3.26769e+06	3.15087e+06	0.964251
gi126517487	NFIX	CTF transcription factor/nuclear factor 1, conserved site|MAD homology 1, Dwarfin-type|CTF transcription factor/nuclear factor 1, DNA-binding domain|CTF transcription factor/nuclear factor 1|CTF transcription factor/nuclear factor 1, N-terminal	14	67	12	271279	5.59079e+07	7.42889e+07	7.17181e+07	5.56366e+07	7.40176e+07	7.14468e+07	0.965268
gi67188876	CEBPZ	CCAAT-binding factor|Armadillo-type fold	6	14	6	0	1.03711e+07	6.16728e+06	6.20728e+06	1.03711e+07	6.16728e+06	6.20728e+06	1.00649
gi157384990	TCFE3	Helix-loop-helix DNA-binding domain|Helix-loop-helix DNA-binding|Protein of unknown function DUF3371	16	56	14	0	5.02497e+07	4.97169e+07	5.07853e+07	5.02497e+07	4.97169e+07	5.07853e+07	1.02149
gi6754610	MAFG	Maf transcription factor|Basic-leucine zipper (bZIP) transcription factor|Eukaryotic transcription factor, Skn-1-like, DNA-binding	5	12	4	0	8.98725e+06	1.35399e+07	1.3859e+07	8.98725e+06	1.35399e+07	1.3859e+07	1.02357
gi6753404	CEBPB	Basic-leucine zipper (bZIP) transcription factor|Basic leucine zipper|CCAAT/enhancer-binding	9	64	8	0	7.27188e+07	2.32602e+08	2.427e+08	7.27188e+07	2.32602e+08	2.427e+08	1.04341
gi66955886	PDS5B	AT hook, DNA-binding motif|Armadillo-type fold	18	39	18	0	1.44814e+07	1.35038e+07	1.4825e+07	1.44814e+07	1.35038e+07	1.4825e+07	1.09784
gi51491880	MTA2	Zinc finger, GATA-type|ELM2|SANT, DNA-binding|Bromo adjacent homology (BAH) domain|SANT, eukarya	16	62	13	1.58244e+06	1.31984e+07	1.08544e+07	1.17729e+07	1.16159e+07	9.27201e+06	1.01905e+07	1.09906
gi74136557	ARID5B	ARID/BRIGHT DNA-binding domain	2	4	2	0	2.41372e+06	3.72184e+06	4.09582e+06	2.41372e+06	3.72184e+06	4.09582e+06	1.10048
gi30795222	GATAD2A	Zinc finger, GATA-type	12	21	12	1.18116e+06	5.2451e+06	3.04234e+06	3.61231e+06	4.06394e+06	1.86117e+06	2.43114e+06	1.30624
gi86198301	CEBPA	Basic-leucine zipper (bZIP) transcription factor|Basic leucine zipper|CCAAT/enhancer-binding	5	9	4	0	9.80826e+06	1.36817e+07	1.79341e+07	9.80826e+06	1.36817e+07	1.79341e+07	1.31081
gi85701534	ZBTB45	BTB/POZ-like|Zinc finger, C2H2-type|BTB/POZ fold|BTB/POZ|Zinc finger, C2H2-type/integrase, DNA-binding|Zinc finger, C2H2-like	4	15	2	0	3.24428e+06	4.44775e+06	6.08259e+06	3.24428e+06	4.44775e+06	6.08259e+06	1.36757
gi6678303	TFAM	High mobility group, HMG1/HMG2|High mobility group, superfamily	15	111	15	6.84463e+07	3.00233e+08	2.14844e+08	2.72307e+08	2.31787e+08	1.46398e+08	2.0386e+08	1.39251
gi12963705	ELF2	Ets|Winged helix-turn-helix transcription repressor DNA-binding|Transcription factor Elf-1, N-terminal	7	14	7	0	3.97754e+06	1.82069e+06	2.54288e+06	3.97754e+06	1.82069e+06	2.54288e+06	1.39666
gi112421097	SMARCC1	Chromo domain|SANT, DNA-binding|BRCT|SWIRM|Homeodomain-like|Myb, DNA-binding|SANT, eukarya	14	32	9	638266	1.44507e+07	8.17754e+06	1.12215e+07	1.38124e+07	7.53928e+06	1.05832e+07	1.40375
gi113205059	YBX1	Cold-shock conserved site|Cold-shock protein, DNA-binding|Cold shock protein|Nucleic acid-binding, OB-fold|Nucleic acid-binding, OB-fold-like	19	150	12	3.29945e+07	2.95964e+08	2.14791e+08	3.03498e+08	2.62969e+08	1.81797e+08	2.70504e+08	1.48795
gi6680231	HMGB3	HMG box A DNA-binding domain, conserved site|High mobility group, HMG1/HMG2, subgroup|High mobility group, HMG1/HMG2|High mobility group, superfamily	1	3	1	0	8.63575e+06	3.73398e+06	6.50132e+06	8.63575e+06	3.73398e+06	6.50132e+06	1.74113
gi262331515	HMGA1	HMG-I/HMG-Y, DNA-binding, conserved site|AT hook, DNA-binding motif|High mobility group, HMG-I/HMG-Y|A.T hook-like	8	86	4	2.24987e+06	1.67892e+08	1.3519e+08	2.36687e+08	1.65642e+08	1.3294e+08	2.34438e+08	1.76348
gi41406074	HMGN1	High mobility group protein HMG14/HMG17	3	13	3	5.00962e+06	7.4579e+06	2.13787e+07	3.88205e+07	2.44828e+06	1.63691e+07	3.38108e+07	2.06553
gi6754612	MAFK	Maf transcription factor|Basic-leucine zipper (bZIP) transcription factor|Eukaryotic transcription factor, Skn-1-like, DNA-binding	5	13	4	0	1.37751e+07	3.53063e+06	1.38657e+07	1.37751e+07	3.53063e+06	1.38657e+07	3.92726
gi161016831	NFYA	CCAAT-binding factor, conserved site|CCAAT-binding transcription factor, subunit B	3	8	3	0	2.46258e+07	2.22579e+06	1.81924e+07	2.46258e+07	2.22579e+06	1.81924e+07	8.17345
gi46575916	HNF4A	Nuclear hormone receptor, ligand-binding, core|Zinc finger, nuclear hormone receptor-type|Nuclear hormone receptor, ligand-binding|Retinoid X receptor|Steroid hormone receptor	1	2	1	0	571941	0	179373	571941	0	179373	#DIV/0!
gi6680241	ONECUT1	Homeobox|Homeodomain protein CUT|Homeodomain-like|Homeodomain-related	4	18	1	0	0	0	217866	0	0	217866	#DIV/0!
gi161353485	ZFP187	Transcription regulator SCAN|Zinc finger, C2H2-type|Zinc finger, C2H2-type/integrase, DNA-binding|Zinc finger, C2H2-like	2	2	2	0	1.33111e+06	0	497563	1.33111e+06	0	497563	#DIV/0!
gi254675249	SMAD3	SMAD domain, Dwarfin-type|MAD homology 1, Dwarfin-type|SMAD/FHA domain|MAD homology, MH1|SMAD domain-like|Dwarfin	2	3	2	0	3.3502e+06	0	524467	3.3502e+06	0	524467	#DIV/0!
gi6754402	JUN	Basic-leucine zipper (bZIP) transcription factor|Jun-like transcription factor|Eukaryotic transcription factor, Skn-1-like, DNA-binding|bZIP transcription factor, bZIP-1|Transcription factor Jun|c-Jun Transcription Factor	1	4	1	1.31586e+06	3.40067e+06	0	1.93806e+06	2.08481e+06	0	622207	#DIV/0!
gi225007600	ZFP212	Krueppel-associated box|Zinc finger, C2H2-type|Zinc finger, C2H2-type/integrase, DNA-binding|Zinc finger, C2H2-like|Protein of unknown function DUF3669, zinc finger protein	1	2	1	0	858974	0	859408	858974	0	859408	#DIV/0!
gi15022805	HMG20A	High mobility group, HMG1/HMG2|High mobility group, superfamily	2	2	2	0	0	0	1.40593e+06	0	0	1.40593e+06	#DIV/0!
gi31981130	KLF13	Zinc finger, C2H2-type|Zinc finger, C2H2-type/integrase, DNA-binding|Zinc finger, C2H2-like	1	2	1	0	0	0	1.47673e+06	0	0	1.47673e+06	#DIV/0!
gi125625318	SP2	Zinc finger, C2H2-type|Zinc finger, C2H2-type/integrase, DNA-binding|Zinc finger, C2H2-like	2	4	2	0	3.03902e+06	0	1.7001e+06	3.03902e+06	0	1.7001e+06	#DIV/0!
gi40254249	NFRKB	-	1	1	1	0	0	0	1.97161e+06	0	0	1.97161e+06	#DIV/0!
gi294979205	WIZ	Zinc finger, C2H2-type|Zinc finger, C2H2-like	1	1	1	0	0	0	2.4615e+06	0	0	2.4615e+06	#DIV/0!
gi188497644	NOC3L	CCAAT-binding factor|Nucleolar complex-associated|Nucleolar complex-associated protein 3	4	5	4	0	5.34501e+06	0	3.06314e+06	5.34501e+06	0	3.06314e+06	#DIV/0!
gi154800435	HOXC4	Homeobox protein, antennapedia type, conserved site|Homeobox, conserved site|Homeobox|Homeodomain-like|Homeodomain-related|Homeobox protein, antennapedia type|Homeobox, region	1	1	1	0	0	0	3.06825e+06	0	0	3.06825e+06	#DIV/0!
gi16905115	MTA3	Zinc finger, GATA-type|ELM2|SANT, DNA-binding|Bromo adjacent homology (BAH) domain|Homeodomain-like|SANT, eukarya	6	14	2	0	0	0	3.08853e+06	0	0	3.08853e+06	#DIV/0!
gi27754097	DR1	Transcription factor CBF/NF-Y/archaeal histone|Histone-fold|Transcription factor, CBFA/NFYB, DNA topoisomerase	2	2	2	0	0	0	4.17291e+06	0	0	4.17291e+06	#DIV/0!
gi6754608	MAFF	Maf transcription factor|Basic-leucine zipper (bZIP) transcription factor|Eukaryotic transcription factor, Skn-1-like, DNA-binding	1	1	1	0	0	0	4.45049e+06	0	0	4.45049e+06	#DIV/0!
gi257196177	ZNF512B	Zinc finger, C2H2-type|Zinc finger, C2H2-like	2	2	2	0	9.71513e+06	0	5.39942e+06	9.71513e+06	0	5.39942e+06	#DIV/0!
gi145279194	HMGXB3	High mobility group, HMG1/HMG2|High mobility group, superfamily	1	1	1	0	0	0	3.19885e+07	0	0	3.19885e+07	#DIV/0!

## Sheet: G6pcp #2 insulin
									sum-90076	sum-90077	sum-90078	sum-90079
	Description	Gene	NOT_in_TF_list			# Peptides	# PSMs	# Unique Peptides	NC	No Tx	Dex/cAMP	D/C/I	No Tx	Dex/cAMP	D/C/I	D/C/I to D/C
gi20806532	Y-box-binding protein 3 short isoform [Mus musculus]	CSDA	GeneID:8531	Cold-shock conserved site|Cold-shock protein, DNA-binding|Cold shock protein|Nucleic acid-binding, OB-fold|Nucleic acid-binding, OB-fold-like	Mus musculus	10	56	4	5.05147e+06	1.47213e+06	192041	0	0	0	0	#DIV/0!
gi71037397	DNA-binding protein Rfx5 [Mus musculus]	RFX5	GeneID:5993	DNA-binding RFX|Winged helix-turn-helix transcription repressor DNA-binding	Mus musculus	3	3	3	301611	0	249762	0	0	0	0	#DIV/0!
gi67188876	CCAAT/enhancer-binding protein zeta [Mus musculus]	CEBPZ	GeneID:10153	CCAAT-binding factor|Armadillo-type fold	Mus musculus	3	8	3	3.28882e+06	2.35173e+06	2.07927e+06	958280	0	0	0	#DIV/0!
gi6754402	transcription factor AP-1 [Mus musculus]	JUN	GeneID:3725	Basic-leucine zipper (bZIP) transcription factor|Jun-like transcription factor|Eukaryotic transcription factor, Skn-1-like, DNA-binding|bZIP transcription factor, bZIP-1|Transcription factor Jun|c-Jun Transcription Factor	Mus musculus	2	6	2	3.30232e+06	1.19234e+06	1.57459e+06	1.01975e+06	0	0	0	#DIV/0!
gi31542626	homeobox-containing protein 1 [Mus musculus]	HMBOX1	GeneID:79618	Homeobox|Hepatocyte nuclear factor 1, N-terminal|Homeodomain-like|Lambda repressor-like, DNA-binding|Homeodomain-related	Mus musculus	7	25	7	9.01559e+06	9.67651e+06	5.18804e+06	4.1677e+06	660913	0	0	#DIV/0!
gi13385296	basic leucine zipper and W2 domain-containing protein 1 [Mus musculus]	BZW1	GeneID:9689	eIF4-gamma/eIF5/eIF2-epsilon|Armadillo-type fold	-	1	1	1	871586	0	0	0	0	0	0	#DIV/0!
gi7106459	circadian locomoter output cycles protein kaput [Mus musculus]	CLOCK	GeneID:9575	PAS|Helix-loop-helix DNA-binding domain|Helix-loop-helix DNA-binding|PAS fold-3|PAS fold|Nuclear translocator|PAC motif	Mus musculus	1	1	1	0	0	0	0	0	0	0	#DIV/0!
gi85701534	zinc finger and BTB domain-containing protein 45 [Mus musculus]	ZBTB45	GeneID:84878	BTB/POZ-like|Zinc finger, C2H2-type|BTB/POZ fold|BTB/POZ|Zinc finger, C2H2-type/integrase, DNA-binding|Zinc finger, C2H2-like	Mus musculus	2	11	1	0	1.5948e+06	0	0	1.5948e+06	0	0	#DIV/0!
gi161353485	zinc finger and SCAN domain-containing protein 26 [Mus musculus]	ZFP187	GeneID:7741	Transcription regulator SCAN|Zinc finger, C2H2-type|Zinc finger, C2H2-type/integrase, DNA-binding|Zinc finger, C2H2-like	Mus musculus	1	1	1	0	497334	0	0	497334	0	0	#DIV/0!
gi125625318	transcription factor Sp2 isoform 1 [Mus musculus]	SP2	GeneID:6668	Zinc finger, C2H2-type|Zinc finger, C2H2-type/integrase, DNA-binding|Zinc finger, C2H2-like	Mus musculus	1	1	1	1.49795e+06	0	0	0	0	0	0	#DIV/0!
gi119226255	transcription factor Sp1 [Mus musculus]	SP1	GeneID:6667	Zinc finger, C2H2-type|Zinc finger, C2H2-type/integrase, DNA-binding|Zinc finger, C2H2-like	Mus musculus	2	2	2	1.06525e+06	0	0	0	0	0	0	#DIV/0!
gi148762976	zinc finger protein basonuclin-1 [Mus musculus]	BNC1	GeneID:646	Zinc finger, C2H2-type|Zinc finger, C2H2-like	Mus musculus	1	1	1	0	0	0	0	0	0	0	#DIV/0!
gi172073164	PR domain zinc finger protein 1 [Mus musculus]	PRDM1	GeneID:639	SET domain|Zinc finger, C2H2-type|Zinc finger, C2H2-type/integrase, DNA-binding|Zinc finger, C2H2-like|PR-domain zinc finger protein PRDM1	Mus musculus	2	2	1	531088	0	0	0	0	0	0	#DIV/0!
gi257196177	zinc finger protein 512B [Mus musculus]	ZNF512B	GeneID:57473	Zinc finger, C2H2-type|Zinc finger, C2H2-like	Mus musculus	1	1	1	0	0	0	0	0	0	0	#DIV/0!
gi31981130	Krueppel-like factor 13 [Mus musculus]	KLF13	GeneID:51621	Zinc finger, C2H2-type|Zinc finger, C2H2-type/integrase, DNA-binding|Zinc finger, C2H2-like	Mus musculus	1	1	1	1.85943e+06	0	0	0	0	0	0	#DIV/0!
gi117647238	zinc finger and BTB domain-containing protein 7A [Mus musculus]	ZBTB7A	GeneID:51341	BTB/POZ-like|Zinc finger, C2H2-type|BTB/POZ fold|BTB/POZ|Zinc finger, C2H2-type/integrase, DNA-binding|Zinc finger, C2H2-like	Mus musculus	1	1	1	0	0	0	0	0	0	0	#DIV/0!
gi28893511	zinc finger protein 771 [Mus musculus]	ZFP771	GeneID:51333	Zinc finger, C2H2-type|Zinc finger, C2H2-type/integrase, DNA-binding|Zinc finger, C2H2-like	Mus musculus	1	1	1	0	0	0	0	0	0	0	#DIV/0!
gi40254249	nuclear factor related to kappa-B-binding protein [Mus musculus]	NFRKB	GeneID:4798	-	Mus musculus	1	1	1	0	0	0	0	0	0	0	#DIV/0!
gi31543307	NGFI-A-binding protein 1 [Mus musculus]	NAB1	GeneID:4664	Nab1, C-terminal|Nab, N-terminal|NAB co-repressor, conserved region 2	Mus musculus	1	1	1	0	0	0	0	0	0	0	#DIV/0!
gi6680512	transcription factor jun-B [Mus musculus]	JUNB	GeneID:3726	Basic-leucine zipper (bZIP) transcription factor|Jun-like transcription factor|Eukaryotic transcription factor, Skn-1-like, DNA-binding|bZIP transcription factor, bZIP-1|Transcription factor Jun	Mus musculus	1	1	1	1.4735e+06	0	0	0	0	0	0	#DIV/0!
gi153945804	hepatocyte nuclear factor 3-beta [Mus musculus]	FOXA2	GeneID:3170	Transcription factor, fork head, conserved site|Transcription factor, fork head|Winged helix-turn-helix transcription repressor DNA-binding|Fork-head N-terminal|Forkhead box protein, C-terminal	Mus musculus	1	2	1	0	0	0	0	0	0	0	#DIV/0!
gi38348308	RING1 and YY1-binding protein [Mus musculus]	RYBP	GeneID:23429	Zinc finger, RanBP2-type	Mus musculus	1	2	1	0	2.45234e+06	0	0	2.45234e+06	0	0	#DIV/0!
gi70887767	hypermethylated in cancer 2 protein [Mus musculus]	HIC2	GeneID:23119	BTB/POZ-like|Zinc finger, C2H2-type|BTB/POZ fold|BTB/POZ|Zinc finger, C2H2-type/integrase, DNA-binding|Zinc finger, C2H2-like	Mus musculus	1	2	1	2.4058e+06	0	0	0	0	0	0	#DIV/0!
gi40789094	zinc fingers and homeoboxes protein 2 [Mus musculus]	ZHX2	GeneID:22882	Homeobox|Zinc finger, C2H2-type|Homeodomain-like|Homeodomain-related|Zinc finger, C2H2-like	Mus musculus	1	1	1	0	0	0	0	0	0	0	#DIV/0!
gi112293262	steroid hormone receptor ERR1 [Mus musculus]	ESRRA	GeneID:2101	Nuclear hormone receptor, ligand-binding, core|Zinc finger, nuclear hormone receptor-type|Nuclear hormone receptor, ligand-binding|Zinc finger, NHR/GATA-type|Retinoid X receptor|Steroid hormone receptor	Mus musculus	1	1	1	0	0	0	0	0	0	0	#DIV/0!
gi27754097	protein Dr1 [Mus musculus]	DR1	GeneID:1810	Transcription factor CBF/NF-Y/archaeal histone|Histone-fold|Transcription factor, CBFA/NFYB, DNA topoisomerase	Mus musculus	1	1	1	0	0	0	0	0	0	0	#DIV/0!
gi19745144	cyclic AMP-responsive element-binding protein 1 isoform B [Mus musculus]	CREB1	GeneID:1385	Coactivator CBP, pKID|Basic-leucine zipper (bZIP) transcription factor|bZIP transcription factor, bZIP-1|cAMP response element binding (CREB) protein	Mus musculus	1	1	1	0	0	0	0	0	0	0	#DIV/0!
gi26787989	39S ribosomal protein L28, mitochondrial [Mus musculus]	MRPL28	GeneID:10573	p53-like transcription factor, DNA-binding	Mus musculus	2	2	2	2.13545e+06	0	0	1.38967e+06	0	0	0	#DIV/0!
gi119703758	transcription factor 7-like 1 isoform 1 [Mus musculus]	TCF7L1	GeneID:83439	High mobility group, HMG1/HMG2|High mobility group, superfamily|CTNNB1 binding, N-teminal	Mus musculus	1	2	1	0	1.73747e+06	730433	0	1.73747e+06	730433	0	0
gi90669983	E3 ubiquitin-protein ligase ZFP91 [Mus musculus]	ZFP91	GeneID:80829	Zinc finger, C2H2-type|Zinc finger, C2H2-like	Mus musculus	1	1	1	0	0	322813	0	0	322813	0	0
gi239835744	transcription factor EB isoform a [Mus musculus]	TCFEB	GeneID:7942	Helix-loop-helix DNA-binding domain|Helix-loop-helix DNA-binding|Protein of unknown function DUF3371	Mus musculus	4	10	2	0	501742	714806	0	501742	714806	0	0
gi15628025	alpha-globin transcription factor CP2 [Mus musculus]	TCFCP2	GeneID:7024	CP2 transcription factor|Sterile alpha motif homology	Mus musculus	2	9	1	0	0	1.01494e+06	0	0	1.01494e+06	0	0
gi295424118	ras-responsive element-binding protein 1 isoform 2 [Mus musculus]	RREB1	GeneID:6239	Zinc finger, C2H2-type|Zinc finger, C2H2-type/integrase, DNA-binding|Zinc finger, C2H2-like	Mus musculus	1	1	1	0	0	2.54234e+06	0	0	2.54234e+06	0	0
gi16905115	metastasis-associated protein MTA3 isoform 2 [Mus musculus]	MTA3	GeneID:57504	Zinc finger, GATA-type|ELM2|SANT, DNA-binding|Bromo adjacent homology (BAH) domain|Homeodomain-like|SANT, eukarya	Mus musculus	6	13	1	1.22429e+06	1.45287e+06	2.12461e+06	0	228587	900323	0	0
gi12963557	DNA methyltransferase 1-associated protein 1 [Mus musculus]	DMAP1	GeneID:55929	SANT, DNA-binding|DNA methyltransferase 1-associated 1	Mus musculus	1	1	1	0	0	420691	0	0	420691	0	0
gi254675249	mothers against decapentaplegic homolog 3 [Mus musculus]	SMAD3	GeneID:4088	SMAD domain, Dwarfin-type|MAD homology 1, Dwarfin-type|SMAD/FHA domain|MAD homology, MH1|SMAD domain-like|Dwarfin	Mus musculus	3	4	3	0	1.35274e+06	793266	0	1.35274e+06	793266	0	0
gi6680732	aryl hydrocarbon receptor nuclear translocator-like protein 1 isoform 1 [Mus musculus]	ARNTL	GeneID:406	PAS|Helix-loop-helix DNA-binding domain|Helix-loop-helix DNA-binding|PAS fold-3|PAS fold|Nuclear translocator|PAC motif	Mus musculus	1	1	1	0	0	716376	0	0	716376	0	0
gi8393627	interferon regulatory factor 3 [Mus musculus]	IRF3	GeneID:3661	Interferon regulatory factor, conserved site|Interferon regulatory factor|SMAD/FHA domain|Winged helix-turn-helix transcription repressor DNA-binding|SMAD domain-like|Interferon regulatory factor-3	-	1	2	1	2.35984e+06	0	3.02704e+06	0	0	667199	0	0
gi134053939	transcription factor CP2-like protein 1 [Mus musculus]	TCFCP2L1	GeneID:29842	CP2 transcription factor|Sterile alpha motif homology	Mus musculus	1	1	1	0	0	1.00026e+06	0	0	1.00026e+06	0	0
gi46048263	Krueppel-like factor 12 [Mus musculus]	KLF12	GeneID:11278	Zinc finger, C2H2-type|Zinc finger, C2H2-type/integrase, DNA-binding|Zinc finger, C2H2-like	Mus musculus	1	1	1	0	0	1.72531e+06	0	0	1.72531e+06	0	0
gi61966683	CCAAT/enhancer-binding protein gamma [Mus musculus]	CEBPG	GeneID:1054	Basic-leucine zipper (bZIP) transcription factor|Basic leucine zipper	Mus musculus	2	5	2	0	3.07839e+06	3.87078e+06	0	3.07839e+06	3.87078e+06	0	0
gi28076891	zinc finger protein 22 [Mus musculus]	ZFP422	GeneID:7570	Zinc finger, C2H2-type|Zinc finger, C2H2-type/integrase, DNA-binding|Zinc finger, C2H2-like	Mus musculus	2	6	2	4.37415e+06	5.41058e+06	5.0327e+06	3.54482e+06	1.03643e+06	658549	0	0
gi10181166	SWI/SNF-related matrix-associated actin-dependent regulator of chromatin subfamily E member 1 [Mus musculus]	SMARCE1	GeneID:6605	High mobility group, HMG1/HMG2|High mobility group, superfamily	Mus musculus	11	43	11	7.2773e+06	5.86196e+06	1.14024e+07	7.58485e+06	0	4.12511e+06	307550	0.0745556
gi133904142	telomeric repeat-binding factor 2 isoform 1 [Mus musculus]	TERF2	GeneID:7014	SANT, DNA-binding|Homeodomain-like|Homeodomain-related|Telomere repeat-binding factor, dimerisation domain|Myb, DNA-binding|HTH transcriptional regulator, Myb-type, DNA-binding|Telomeric repeat-binding factor 1, Pin2	Mus musculus	2	5	2	1.87247e+06	1.14224e+06	2.19529e+06	1.90591e+06	0	322816	33434.4	0.103571
gi262331515	high mobility group protein HMG-I/HMG-Y isoform e [Mus musculus]	HMGA1	GeneID:3159	HMG-I/HMG-Y, DNA-binding, conserved site|AT hook, DNA-binding motif|High mobility group, HMG-I/HMG-Y|A.T hook-like	Mus musculus	4	18	2	0	1.46516e+07	1.53802e+07	2.85756e+06	1.46516e+07	1.53802e+07	2.85756e+06	0.185795
gi6679627	ETS-related transcription factor Elf-1 [Mus musculus]	ELF1	GeneID:1997	Ets|Winged helix-turn-helix transcription repressor DNA-binding|Transcription factor Elf-1, N-terminal	Mus musculus	3	4	3	0	0	7.20255e+06	1.34694e+06	0	7.20255e+06	1.34694e+06	0.187009
gi171846256	nuclear factor 1 A-type isoform 1 [Mus musculus]	NFIA	GeneID:4774	CTF transcription factor/nuclear factor 1, conserved site|MAD homology 1, Dwarfin-type|CTF transcription factor/nuclear factor 1, DNA-binding domain|CTF transcription factor/nuclear factor 1|CTF transcription factor/nuclear factor 1, N-terminal	Mus musculus	13	50	10	3.81377e+06	9.92707e+06	2.1486e+07	7.16781e+06	6.11331e+06	1.76722e+07	3.35405e+06	0.189792
gi51491880	metastasis-associated protein MTA2 [Mus musculus]	MTA2	GeneID:9219	Zinc finger, GATA-type|ELM2|SANT, DNA-binding|Bromo adjacent homology (BAH) domain|SANT, eukarya	Mus musculus	19	56	16	8.69404e+06	7.75388e+06	1.09915e+07	9.26691e+06	0	2.29745e+06	572863	0.249347
gi119220568	one cut domain family member 2 [Mus musculus]	ONECUT2	GeneID:9480	Homeobox|Homeodomain protein CUT|Homeodomain-like|Homeodomain-related	Mus musculus	4	16	4	3.99414e+06	3.74948e+07	6.91037e+07	2.34772e+07	3.35006e+07	6.51096e+07	1.94831e+07	0.299235
gi294979205	protein Wiz isoform 1 [Mus musculus]	WIZ	GeneID:58525	Zinc finger, C2H2-type|Zinc finger, C2H2-like	Mus musculus	2	4	2	0	2.81387e+06	3.14619e+06	1.09455e+06	2.81387e+06	3.14619e+06	1.09455e+06	0.347896
gi21314854	transcriptional repressor p66-beta [Mus musculus]	GATAD2B	GeneID:57459	Zinc finger, GATA-type	Mus musculus	6	18	6	2.27296e+06	3.38321e+06	3.27764e+06	2.63663e+06	1.11025e+06	1.00467e+06	363671	0.361979
gi41406074	non-histone chromosomal protein HMG-14 [Mus musculus]	HMGN1	GeneID:3150	High mobility group protein HMG14/HMG17	Homo sapiens	2	6	2	0	2.87783e+06	1.24456e+06	519271	2.87783e+06	1.24456e+06	519271	0.417232
gi8393832	nuclear factor interleukin-3-regulated protein [Mus musculus]	NFIL3	GeneID:4783	Basic-leucine zipper (bZIP) transcription factor|Vertebrate interleukin-3 regulated transcription factor|Basic leucine zipper|Transcription factor, basic leucine zipper, E4BP4	Mus musculus	8	15	8	1.13577e+06	454235	4.68241e+06	2.85303e+06	0	3.54664e+06	1.71726e+06	0.484194
gi126517474	nuclear factor 1 X-type isoform 3 [Mus musculus]	NFIX	GeneID:4784	CTF transcription factor/nuclear factor 1, conserved site|MAD homology 1, Dwarfin-type|CTF transcription factor/nuclear factor 1, DNA-binding domain|CTF transcription factor/nuclear factor 1|CTF transcription factor/nuclear factor 1, N-terminal	Mus musculus	12	52	11	2.33553e+06	1.13691e+07	3.67736e+07	1.92036e+07	9.03359e+06	3.44381e+07	1.68681e+07	0.489809
gi113205057	nucleolar transcription factor 1 isoform 1 [Mus musculus]	UBTF	GeneID:7343	High mobility group, HMG1/HMG2|High mobility group, superfamily	Mus musculus	20	61	20	9.90595e+06	7.28121e+06	1.7328e+07	1.36277e+07	0	7.42203e+06	3.72175e+06	0.501446
gi14010847	nuclear receptor subfamily 5 group A member 2 isoform 1 [Mus musculus]	NR5A2	GeneID:2494	Nuclear hormone receptor, ligand-binding, core|Zinc finger, nuclear hormone receptor-type|Nuclear hormone receptor, ligand-binding|Zinc finger, NHR/GATA-type|Vitamin D receptor|Steroid hormone receptor|Orphan nuclear receptor Fushi-tarazu factor 1	Mus musculus	2	4	2	0	6.35912e+06	2.90637e+06	1.51189e+06	6.35912e+06	2.90637e+06	1.51189e+06	0.520199
gi209862973	FACT complex subunit SSRP1 [Mus musculus]	SSRP1	GeneID:6749	High mobility group, HMG1/HMG2|High mobility group, superfamily|Structure-specific recognition protein	Mus musculus	2	3	2	0	0	1.35009e+06	706791	0	1.35009e+06	706791	0.523513
gi91598896	metastasis-associated protein MTA1 [Mus musculus]	MTA1	GeneID:9112	Zinc finger, GATA-type|ELM2|SANT, DNA-binding|Bromo adjacent homology (BAH) domain|Homeodomain-like|SANT, eukarya	Mus musculus	7	11	3	0	132045	1.61639e+06	874020	132045	1.61639e+06	874020	0.540725
gi114326538	nuclear transcription factor Y subunit gamma isoform 1 [Mus musculus]	NFYC	GeneID:4802	Transcription factor CBF/NF-Y/archaeal histone|Histone-fold	Mus musculus	4	5	4	0	0	1.01873e+07	5.94602e+06	0	1.01873e+07	5.94602e+06	0.583668
gi110225364	zinc finger homeobox protein 3 [Mus musculus]	ZFHX3	GeneID:463	Homeobox, conserved site|Homeobox|Zinc finger, U1-type|Zinc finger, C2H2-type|Homeodomain-like|Homeodomain-related|Zinc finger, C2H2-type/integrase, DNA-binding|Zinc finger, C2H2-like	Mus musculus	8	15	8	154427	450295	3.54424e+06	2.17769e+06	295869	3.38981e+06	2.02327e+06	0.596868
gi166235125	SWI/SNF complex subunit SMARCC2 isoform 1 [Mus musculus]	SMARCC2	GeneID:6601	Chromo domain|SANT, DNA-binding|BRCT|SWIRM|Homeodomain-like|Myb, DNA-binding|SANT, eukarya	Mus musculus	17	62	12	1.27277e+07	5.28194e+07	2.1734e+07	1.86894e+07	4.00916e+07	9.00629e+06	5.96163e+06	0.66194
gi134032032	upstream-binding protein 1 isoform a [Mus musculus]	UBP1	GeneID:7342	CP2 transcription factor|Sterile alpha motif homology	Mus musculus	7	25	6	2.34573e+06	4.36428e+06	8.64875e+06	6.55246e+06	2.01855e+06	6.30302e+06	4.20673e+06	0.667414
gi257196201	zinc finger and BTB domain-containing protein 20 isoform L [Mus musculus]	ZBTB20	GeneID:26137	BTB/POZ-like|Zinc finger, C2H2-type|BTB/POZ fold|BTB/POZ|Zinc finger, C2H2-type/integrase, DNA-binding|Zinc finger, C2H2-like	Mus musculus	16	106	15	3.45962e+07	4.89803e+07	8.20851e+07	6.77694e+07	1.43841e+07	4.74889e+07	3.31732e+07	0.698546
gi6679042	nuclear factor 1 C-type isoform a [Mus musculus]	NFIC	GeneID:4782	CTF transcription factor/nuclear factor 1, conserved site|MAD homology 1, Dwarfin-type|CTF transcription factor/nuclear factor 1, DNA-binding domain|CTF transcription factor/nuclear factor 1|CTF transcription factor/nuclear factor 1, N-terminal	Mus musculus	11	69	9	4.46139e+06	2.17521e+07	3.57607e+07	2.80875e+07	1.72908e+07	3.12994e+07	2.36262e+07	0.754844
gi6754608	transcription factor MafF [Mus musculus]	MAFF	GeneID:23764	Maf transcription factor|Basic-leucine zipper (bZIP) transcription factor|Eukaryotic transcription factor, Skn-1-like, DNA-binding	Mus musculus	1	2	1	0	0	5.40819e+06	4.2522e+06	0	5.40819e+06	4.2522e+06	0.786252
gi160948575	telomeric repeat-binding factor 2-interacting protein 1 [Mus musculus]	TERF2IP	GeneID:54386	Homeodomain-like|Homeodomain-related|Rap1 Myb	Mus musculus	5	12	5	1.44413e+06	2.22992e+06	1.97091e+06	1.8668e+06	785790	526787	422671	0.802357
gi6678303	transcription factor A, mitochondrial precursor [Mus musculus]	TFAM	GeneID:7019	High mobility group, HMG1/HMG2|High mobility group, superfamily	Homo sapiens	14	112	14	3.96215e+07	1.11321e+08	1.83053e+08	1.65596e+08	7.16996e+07	1.43432e+08	1.25975e+08	0.87829
gi40254124	SWI/SNF-related matrix-associated actin-dependent regulator of chromatin subfamily A member 5 [Mus musculus]	SMARCA5	GeneID:8467	SNF2-related|SANT, DNA-binding|DNA/RNA helicase, C-terminal|Homeodomain-like|DEAD-like helicase, N-terminal|Helicase, superfamily 1/2, ATP-binding domain|ATPase, nucleosome remodelling ISWI, HAND domain|SLIDE|SANT, eukarya	Mus musculus	29	94	29	1.44253e+07	2.22923e+07	3.6064e+07	3.43591e+07	7.86698e+06	2.16387e+07	1.99337e+07	0.921207
gi22779899	cell division cycle 5-like protein [Mus musculus]	CDC5L	GeneID:988	SANT, DNA-binding|Homeodomain-like|Homeodomain-related|Myb, DNA-binding|HTH transcriptional regulator, Myb-type, DNA-binding|Myb transcription factor|Protein of unknown function DUF3351	Mus musculus	36	136	36	1.26931e+07	6.54274e+07	6.82273e+07	6.41602e+07	5.27343e+07	5.55343e+07	5.14671e+07	0.926763
gi159032064	sal-like protein 1 [Mus musculus]	SALL1	GeneID:6299	Zinc finger, C2H2-type|Zinc finger, C2H2-type/integrase, DNA-binding|Zinc finger, C2H2-like	Mus musculus	4	8	4	0	2.33226e+06	3.36917e+06	3.23027e+06	2.33226e+06	3.36917e+06	3.23027e+06	0.958772
gi161016831	nuclear transcription factor Y subunit alpha isoform a [Mus musculus]	NFYA	GeneID:4800	CCAAT-binding factor, conserved site|CCAAT-binding transcription factor, subunit B	Mus musculus	2	6	2	0	0	8.2887e+06	8.04033e+06	0	8.2887e+06	8.04033e+06	0.970036
gi86198301	CCAAT/enhancer-binding protein alpha [Mus musculus]	CEBPA	GeneID:1050	Basic-leucine zipper (bZIP) transcription factor|Basic leucine zipper|CCAAT/enhancer-binding	Mus musculus	3	8	2	0	3.38137e+06	5.34916e+06	5.25034e+06	3.38137e+06	5.34916e+06	5.25034e+06	0.981525
gi158508460	protein ELYS [Mus musculus]	AHCTF1	GeneID:25909	AT hook, DNA-binding motif	Mus musculus	66	249	66	6.80546e+06	4.87414e+07	9.34833e+07	9.20834e+07	4.19359e+07	8.66778e+07	8.5278e+07	0.98385
gi172073171	TATA-box-binding protein [Mus musculus]	TBP	GeneID:6908	Transcription factor TFIID, C-terminal/DNA glycosylase, N-terminal|Beta2-adaptin/TATA-box binding, C-terminal|TATA-box binding	Mus musculus	3	9	3	1.48083e+06	5.75534e+06	7.89126e+06	7.80343e+06	4.27451e+06	6.41042e+06	6.32259e+06	0.986299
gi74136557	AT-rich interactive domain-containing protein 5B [Mus musculus]	ARID5B	GeneID:84159	ARID/BRIGHT DNA-binding domain	Mus musculus	4	4	4	0	0	1.30807e+06	1.32626e+06	0	1.30807e+06	1.32626e+06	1.0139
gi255982546	nuclear respiratory factor 1 isoform b [Mus musculus]	NRF1	GeneID:4899	Nuclear respiratory factor-1, activation binding domain|Nuclear respiratory factor 1, NLS/DNA-binding, dimerisation domain	Mus musculus	2	2	2	0	0	2.1113e+06	2.15363e+06	0	2.1113e+06	2.15363e+06	1.02005
gi157384990	transcription factor E3 isoform a [Mus musculus]	TCFE3	GeneID:7030	Helix-loop-helix DNA-binding domain|Helix-loop-helix DNA-binding|Protein of unknown function DUF3371	Mus musculus	12	46	10	6.38729e+06	2.23128e+07	2.42443e+07	2.48171e+07	1.59255e+07	1.7857e+07	1.84298e+07	1.03207
gi6756049	zinc finger protein 148 [Mus musculus]	ZFP148	GeneID:7707	Zinc finger, C2H2-type|Zinc finger, C2H2-type/integrase, DNA-binding|Zinc finger, C2H2-like	Mus musculus	2	3	2	0	0	3.87488e+06	4.33863e+06	0	3.87488e+06	4.33863e+06	1.11968
gi153792362	ETS domain-containing protein Elk-4 [Mus musculus]	ELK4	GeneID:2005	Ets|Winged helix-turn-helix transcription repressor DNA-binding	Mus musculus	5	8	5	0	3.92508e+06	8.25936e+06	9.42638e+06	3.92508e+06	8.25936e+06	9.42638e+06	1.1413
gi166295202	hepatocyte nuclear factor 1-alpha [Mus musculus]	HNF1A	GeneID:6927	Homeobox|Hepatocyte nuclear factor 1, beta isoform, C-terminal|Hepatocyte nuclear factor 1, alpha isoform C-terminal|Hepatocyte nuclear factor 1, N-terminal|Homeodomain-like|Lambda repressor-like, DNA-binding|Homeodomain-related	Mus musculus	6	9	6	0	269623	5.44651e+06	6.24111e+06	269623	5.44651e+06	6.24111e+06	1.14589
gi262205246	transcriptional enhancer factor TEF-1 isoform 1 [Mus musculus]	TEAD1	GeneID:7003	TEA/ATTS|Transcriptional enhancer factor	Mus musculus	6	16	6	4.03261e+06	5.8727e+06	7.7389e+06	8.31634e+06	1.84008e+06	3.70629e+06	4.28372e+06	1.1558
gi226437608	PAX3- and PAX7-binding protein 1 [Mus musculus]	GCFC1	GeneID:94104	GC-rich sequence DNA-binding factor-like	Mus musculus	7	14	7	0	4.82457e+06	3.42369e+06	3.97266e+06	4.82457e+06	3.42369e+06	3.97266e+06	1.16034
gi145553997	AT rich interactive domain 1B (Swi1 like) [Mus musculus]	ARID1B	GeneID:57492	ARID/BRIGHT DNA-binding domain|Protein of unknown function DUF3518	Mus musculus	8	12	6	745326	1.34326e+06	1.02766e+06	1.07305e+06	597934	282329	327723	1.16078
gi94400775	recombining binding protein suppressor of hairless isoform 1 [Mus musculus]	RBPJ	GeneID:3516	Cell surface receptor IPT/TIG|p53-like transcription factor, DNA-binding|Immunoglobulin-like fold|Immunoglobulin E-set|Beta-trefoil|LAG1, DNA binding	Mus musculus	3	8	3	1.01814e+06	3783249	3.76771e+06	4.28548e+06	2.76511e+06	2.74957e+06	3.26734e+06	1.18831
gi113205059	nuclease-sensitive element-binding protein 1 [Mus musculus]	YBX1	GeneID:4904	Cold-shock conserved site|Cold-shock protein, DNA-binding|Cold shock protein|Nucleic acid-binding, OB-fold|Nucleic acid-binding, OB-fold-like	Mus musculus	18	126	12	6.18329e+07	6.19425e+07	9.28391e+07	9.873e+07	109526	3.10061e+07	3.68971e+07	1.18999
gi110835729	protein CASP isoform a [Mus musculus]	CUX1	GeneID:1523	Homeobox, conserved site|Homeobox|Homeodomain protein CUT|Homeodomain-like|Homeodomain-related|CASP, C-terminal	Mus musculus	1	2	1	0	0	877222	1.10143e+06	0	877222	1.10143e+06	1.25559
gi6680231	high mobility group protein B3 [Mus musculus]	HMGB3	GeneID:3149	HMG box A DNA-binding domain, conserved site|High mobility group, HMG1/HMG2, subgroup|High mobility group, HMG1/HMG2|High mobility group, superfamily	Mus musculus	1	3	1	0	19485431	1.30545e+07	1.65044e+07	19485431	1.30545e+07	1.65044e+07	1.26427
gi164519134	transcriptional repressor p66 alpha isoform b [Mus musculus]	GATAD2A	GeneID:54815	Zinc finger, GATA-type	Mus musculus	6	11	6	1.29769e+06	1.52841e+06	1.9232e+06	2.09342e+06	230721	625507	795722	1.27212
gi112421097	SWI/SNF complex subunit SMARCC1 [Mus musculus]	SMARCC1	GeneID:6599	Chromo domain|SANT, DNA-binding|BRCT|SWIRM|Homeodomain-like|Myb, DNA-binding|SANT, eukarya	Mus musculus	13	51	8	4.94507e+06	6.7792e+06	6.78292e+06	7.37301e+06	1.83414e+06	1.83786e+06	2.42794e+06	1.32107
gi124249109	AT-rich interactive domain-containing protein 1A [Mus musculus]	ARID1A	GeneID:8289	ARID/BRIGHT DNA-binding domain|Protein of unknown function DUF3518	Mus musculus	12	22	10	3.45151e+06	0	4.96819e+06	5.49072e+06	0	1.51668e+06	2.03921e+06	1.34452
gi163965420	nuclear factor 1 B-type isoform 1 [Mus musculus]	NFIB	GeneID:4781	CTF transcription factor/nuclear factor 1, conserved site|MAD homology 1, Dwarfin-type|CTF transcription factor/nuclear factor 1, DNA-binding domain|CTF transcription factor/nuclear factor 1|CTF transcription factor/nuclear factor 1, N-terminal	Mus musculus	8	25	6	695920	1.50824e+06	4.5568e+06	6.02068e+06	812315	3.86088e+06	5.32476e+06	1.37916
gi56118239	transcription factor SOX-4 [Mus musculus]	SOX4	GeneID:6659	High mobility group, HMG1/HMG2|High mobility group, superfamily|SOX-12/11/4a	Mus musculus	2	10	2	0	0	331066	472493	0	331066	472493	1.42719
gi194328715	zinc finger protein 207 isoform 1 [Mus musculus]	ZFP207	GeneID:7756	Zinc finger, C2H2-type|Zinc finger, C2H2-like	Mus musculus	3	12	3	1.0419e+07	1.42326e+07	1.56288e+07	1.78794e+07	3.81367e+06	5.20979e+06	7.46042e+06	1.432
gi6753404	CCAAT/enhancer-binding protein beta [Mus musculus]	CEBPB	GeneID:1051	Basic-leucine zipper (bZIP) transcription factor|Basic leucine zipper|CCAAT/enhancer-binding	Mus musculus	8	49	7	0	1.08746e+07	5.20224e+07	7.72105e+07	1.08746e+07	5.20224e+07	7.72105e+07	1.48418
gi12963705	ETS-related transcription factor Elf-2 [Mus musculus]	ELF2	GeneID:1998	Ets|Winged helix-turn-helix transcription repressor DNA-binding|Transcription factor Elf-1, N-terminal	Mus musculus	6	11	6	0	1.85904e+06	1.772e+06	2.63596e+06	1.85904e+06	1.772e+06	2.63596e+06	1.48756
gi254553392	zinc finger protein 512 [Mus musculus]	ZFP512	GeneID:84450	Zinc finger, C2H2-type|Zinc finger, C2H2-like	Mus musculus	8	24	8	4.21841e+06	4.22122e+06	5.44625e+06	6.18811e+06	2806.3	1.22784e+06	1.9697e+06	1.60419
gi46909569	transcription factor GATA-4 [Mus musculus]	GATA4	GeneID:2626	Zinc finger, GATA-type|GATA-type transcription activator, N-terminal|Zinc finger, NHR/GATA-type|Transcription factor GATA-4/5/6	Mus musculus	2	7	2	0	2.85306e+06	743614	1.28428e+06	2.85306e+06	743614	1.28428e+06	1.72708
gi66955886	sister chromatid cohesion protein PDS5 homolog B [Mus musculus]	PDS5B	GeneID:23047	AT hook, DNA-binding motif|Armadillo-type fold	Mus musculus	27	63	26	5.25918e+06	1.1635e+07	1.08848e+07	1.57372e+07	6.37586e+06	5.6256e+06	1.0478e+07	1.86256
gi117414176	vascular endothelial zinc finger 1 [Mus musculus]	VEZF1	GeneID:7716	Zinc finger, C2H2-type|Zinc finger, C2H2-type/integrase, DNA-binding|Zinc finger, C2H2-like	Mus musculus	3	5	3	1.641e+06	395873	1.64583e+06	1.72815e+06	0	4833.48	87151.1	18.0307
gi140969817	nucleosome-remodeling factor subunit BPTF [Mus musculus]	BPTF	GeneID:2186	Bromodomain, conserved site|Zinc finger, PHD-type, conserved site|Bromodomain|Zinc finger, PHD-type|DDT domain|DDT domain, subgroup|DDT domain superfamily|Zinc finger, PHD-finger	Homo sapiens	1	1	1	0	0	0	250127	0	0	250127	#DIV/0!
gi166706895	TOX high mobility group box family member 4 [Mus musculus]	TOX4	GeneID:9878	High mobility group, HMG1/HMG2, subgroup|High mobility group, HMG1/HMG2|High mobility group, superfamily	Mus musculus	8	21	8	6.51514e+06	1.07778e+07	6.25494e+06	7.8965e+06	4.26263e+06	0	1.38136e+06	#DIV/0!
gi31982421	transcriptional repressor protein YY1 [Mus musculus]	YY1	GeneID:7528	Zinc finger, C2H2-type|Zinc finger, C2H2-type/integrase, DNA-binding|Zinc finger, C2H2-like|Transcription factor yin/yang	Mus musculus	5	10	5	2.11095e+06	1.3945e+06	1.20408e+06	6.67891e+06	0	0	4.56796e+06	#DIV/0!
gi33859684	DNA/RNA-binding protein KIN17 [Mus musculus]	KIN	GeneID:22944	Zinc finger, C2H2-like|DNA/RNA-binding protein Kin17, conserved region	Mus musculus	3	3	3	0	0	0	5.0176e+06	0	0	5.0176e+06	#DIV/0!
gi31044459	transcriptional repressor CTCF [Mus musculus]	CTCF	GeneID:10664	Zinc finger, C2H2-type|Zinc finger, C2H2-type/integrase, DNA-binding|Zinc finger, C2H2-like	Mus musculus	2	2	2	0	0	0	5.53183e+06	0	0	5.53183e+06	#DIV/0!
gi6677853	NK1 transcription factor-related protein 2 [Mus musculus]	NKX1-2	GeneID:390010	Homeobox, conserved site|Homeobox|Homeodomain-like|Homeodomain-related|Homeobox, region	Mus musculus	1	4	1	7.93038e+07	4.54958e+06	5.38929e+07	8.68825e+07	0	0	7.57862e+06	#DIV/0!

## Sheet: G6pcp #3 insulin
Accession	Gene name	Description	Gene symbol	# Peptides	# PSMs	No Tx	Dex/cAMP	D/C/I	D/C/I to D/C
6680732	ARNTL	PAS|Helix-loop-helix DNA-binding domain|Helix-loop-helix DNA-binding|PAS fold-3|PAS fold|Nuclear translocator|PAC motif	Arntl	1	1	1.0457e+06	0	0	#DIV/0!
31542346	CBX2	AT hook, DNA-binding motif|Chromo domain|Chromo domain-like	Cbx2	1	2	1.23107e+06	0	0	#DIV/0!
61966683	CEBPG	Basic-leucine zipper (bZIP) transcription factor|Basic leucine zipper	Cebpg	1	1	0	0	0	#DIV/0!
110835729	CUX1	Homeobox, conserved site|Homeobox|Homeodomain protein CUT|Homeodomain-like|Homeodomain-related|CASP, C-terminal	Cux1	1	1	0	0	0	#DIV/0!
12963557	DMAP1	SANT, DNA-binding|DNA methyltransferase 1-associated 1	Dmap1	4	8	1.12483e+06	0	0	#DIV/0!
27754097	DR1	Transcription factor CBF/NF-Y/archaeal histone|Histone-fold|Transcription factor, CBFA/NFYB, DNA topoisomerase	Dr1	1	1	0	0	0	#DIV/0!
84579952	ETS1	Ets|Sterile alpha motif/pointed|Sterile alpha motif homology|Winged helix-turn-helix transcription repressor DNA-binding|Sterile alpha motif-type|Transforming factor C-ets	Ets1	1	1	2.41635e+06	0	0	#DIV/0!
134032021	ETV3	Ets|Winged helix-turn-helix transcription repressor DNA-binding	Etv3	1	1	0	0	0	#DIV/0!
161086973	GATAD1	Zinc finger, GATA-type	Gatad1	1	1	0	0	0	#DIV/0!
70887767	HIC2	BTB/POZ-like|Zinc finger, C2H2-type|BTB/POZ fold|BTB/POZ|Zinc finger, C2H2-type/integrase, DNA-binding|Zinc finger, C2H2-like	Hic2	1	3	0	0	0	#DIV/0!
6754402	JUN	Basic-leucine zipper (bZIP) transcription factor|Jun-like transcription factor|Eukaryotic transcription factor, Skn-1-like, DNA-binding|bZIP transcription factor, bZIP-1|Transcription factor Jun|c-Jun Transcription Factor	Jun	3	8	0	0	0	#DIV/0!
31981130	KLF13	Zinc finger, C2H2-type|Zinc finger, C2H2-type/integrase, DNA-binding|Zinc finger, C2H2-like	Klf13	1	4	0	0	0	#DIV/0!
6754610	MAFG	Maf transcription factor|Basic-leucine zipper (bZIP) transcription factor|Eukaryotic transcription factor, Skn-1-like, DNA-binding	Mafg	2	2	6.44253e+06	0	0	#DIV/0!
16905115	MTA3	Zinc finger, GATA-type|ELM2|SANT, DNA-binding|Bromo adjacent homology (BAH) domain|Homeodomain-like|SANT, eukarya	Mta3	6	18	0	0	0	#DIV/0!
31543307	NAB1	Nab1, C-terminal|Nab, N-terminal|NAB co-repressor, conserved region 2	Nab1	1	1	2.56235e+06	0	0	#DIV/0!
84875520	SKIL	Putative DNA binding domain|SAND-like|c-SKI Smad4 binding|Transforming protein Ski	Skil	1	1	0	0	0	#DIV/0!
357197177	SMAD2	SMAD domain, Dwarfin-type|MAD homology 1, Dwarfin-type|SMAD/FHA domain|MAD homology, MH1|SMAD domain-like|Dwarfin	Smad2	2	2	0	0	0	#DIV/0!
6678305	TFDP1	Transcription factor E2F/dimerisation partner (TDP)|Winged helix-turn-helix transcription repressor DNA-binding|Transcription factor DP, C-terminal|Transcription factor DP|Transcription factor DP, subgroup	Tfdp1	1	1	2.41008e+06	0	0	#DIV/0!
21450287	CSDE1	Cold-shock conserved site|Cold-shock protein, DNA-binding|Cold shock protein|Nucleic acid-binding, OB-fold-like	Csde1	4	6	0	0	0	#DIV/0!
6680512	JUNB	Basic-leucine zipper (bZIP) transcription factor|Jun-like transcription factor|Eukaryotic transcription factor, Skn-1-like, DNA-binding|bZIP transcription factor, bZIP-1|Transcription factor Jun	Junb	6	11	3.078e+06	0	0	#DIV/0!
85701534	ZBTB45	BTB/POZ-like|Zinc finger, C2H2-type|BTB/POZ fold|BTB/POZ|Zinc finger, C2H2-type/integrase, DNA-binding|Zinc finger, C2H2-like	Zbtb45	3	14	3.65483e+06	0	0	#DIV/0!
161353485	ZFP187	Transcription regulator SCAN|Zinc finger, C2H2-type|Zinc finger, C2H2-type/integrase, DNA-binding|Zinc finger, C2H2-like	Zscan26	2	4	0	0	0	#DIV/0!
28076891	ZFP422	Zinc finger, C2H2-type|Zinc finger, C2H2-type/integrase, DNA-binding|Zinc finger, C2H2-like	Zfp422	6	21	3.62663e+06	0	0	#DIV/0!
254553392	ZFP512	Zinc finger, C2H2-type|Zinc finger, C2H2-like	Zfp512	17	75	0	0	0	#DIV/0!
22122757	ZFP553	Zinc finger, C2H2-type|Zinc finger, C2H2-type/integrase, DNA-binding|Zinc finger, C2H2-like	Zfp553	2	3	1.70194e+06	0	0	#DIV/0!
40254321	ZHX3	Homeobox|Homeodomain-like|Homeodomain-related|Zinc finger, C2H2-like	Zhx3	1	1	0	0	0	#DIV/0!
47059495	CSDA	Cold-shock conserved site|Cold-shock protein, DNA-binding|Cold shock protein|Nucleic acid-binding, OB-fold|Nucleic acid-binding, OB-fold-like	Ybx3	11	95	3.96813e+06	0	0	#DIV/0!
13385296	BZW1	eIF4-gamma/eIF5/eIF2-epsilon|Armadillo-type fold	Bzw1	1	1	0	0	0	#DIV/0!
6681285	EGR1	Zinc finger, C2H2-type|Zinc finger, C2H2-type/integrase, DNA-binding|Zinc finger, C2H2-like|Protein of unknown function DUF3432|Protein of unknown function DUF3446	Egr1	1	1	0	0	0	#DIV/0!
209862973	SSRP1	High mobility group, HMG1/HMG2|High mobility group, superfamily|Structure-specific recognition protein	Ssrp1	7	14	0	0	0	#DIV/0!
119226255	SP1	Zinc finger, C2H2-type|Zinc finger, C2H2-type/integrase, DNA-binding|Zinc finger, C2H2-like	Sp1	1	3	0	0	0	#DIV/0!
65301157	SP3	Zinc finger, C2H2-type|Zinc finger, C2H2-type/integrase, DNA-binding|Zinc finger, C2H2-like	Sp3	1	3	0	0	0	#DIV/0!
6678287	TERF1	SANT, DNA-binding|Homeodomain-like|Homeodomain-related|Telomere repeat-binding factor, dimerisation domain|Myb, DNA-binding|HTH transcriptional regulator, Myb-type, DNA-binding|Telomeric repeat-binding factor 1, Pin2	Terf1	1	1	0	0	0	#DIV/0!
113205053	UBTF	High mobility group, HMG1/HMG2|High mobility group, superfamily	Ubtf	22	120	2.02122e+06	0	0	#DIV/0!
113205059	YBX1	Cold-shock conserved site|Cold-shock protein, DNA-binding|Cold shock protein|Nucleic acid-binding, OB-fold|Nucleic acid-binding, OB-fold-like	Ybx1	13	183	0	0	0	#DIV/0!
31982421	YY1	Zinc finger, C2H2-type|Zinc finger, C2H2-type/integrase, DNA-binding|Zinc finger, C2H2-like|Transcription factor yin/yang	Yy1	8	31	3.7369e+07	0	0	#DIV/0!
62177117	BAZ2B	Bromodomain, conserved site|Bromodomain|Methyl-CpG DNA binding|Zinc finger, PHD-type|DDT domain|Zinc finger, FYVE/PHD-type|DNA-binding, integrase-type|DDT domain, subgroup|DDT domain superfamily|Zinc finger, PHD-finger	Baz2b	1	2	0	0	757137	#DIV/0!
82546826	FOXK1	Transcription factor, fork head, conserved site|Forkhead-associated|Transcription factor, fork head|SMAD/FHA domain	Foxk1	3	5	6.62829e+06	0	3.71099e+06	#DIV/0!
238018071	FOXK2	Transcription factor, fork head, conserved site|Forkhead-associated|Transcription factor, fork head|SMAD/FHA domain	Foxk2	1	1	0	0	657845	#DIV/0!
34328119	GABPA	Ets|Sterile alpha motif/pointed|Sterile alpha motif homology|Winged helix-turn-helix transcription repressor DNA-binding|Sterile alpha motif-type|Transcription factor, GA-binding, alpha subunit	Gabpa	1	3	0	0	1.4451e+06	#DIV/0!
46909571	GATA6	Zinc finger, GATA-type|GATA-type transcription activator, N-terminal|Zinc finger, NHR/GATA-type	Gata6	1	2	0	0	2.47693e+06	#DIV/0!
253683481	HMG20B	High mobility group, HMG1/HMG2, subgroup|High mobility group, HMG1/HMG2|High mobility group, superfamily	Hmg20b	1	1	0	0	556738	#DIV/0!
46575916	HNF4A	Nuclear hormone receptor, ligand-binding, core|Zinc finger, nuclear hormone receptor-type|Nuclear hormone receptor, ligand-binding|Retinoid X receptor|Steroid hormone receptor	Hnf4a	2	6	2.97297e+06	0	1.55875e+06	#DIV/0!
6680582	KLF3	Zinc finger, C2H2-type|Zinc finger, C2H2-type/integrase, DNA-binding|Zinc finger, C2H2-like	Klf3	1	2	0	0	3.41797e+06	#DIV/0!
254675249	SMAD3	SMAD domain, Dwarfin-type|MAD homology 1, Dwarfin-type|SMAD/FHA domain|MAD homology, MH1|SMAD domain-like|Dwarfin	Smad3	3	4	4382428	0	2.05504e+06	#DIV/0!
56118239	SOX4	High mobility group, HMG1/HMG2|High mobility group, superfamily|SOX-12/11/4a	Sox4	1	2	0	0	522903	#DIV/0!
113205057	UBTF	High mobility group, HMG1/HMG2|High mobility group, superfamily	Ubtf	22	119	0	0	1.32305e+07	#DIV/0!
117414176	VEZF1	Zinc finger, C2H2-type|Zinc finger, C2H2-type/integrase, DNA-binding|Zinc finger, C2H2-like	Vezf1	3	12	3.38814e+06	0	3.50008e+06	#DIV/0!
28893511	ZFP771	Zinc finger, C2H2-type|Zinc finger, C2H2-type/integrase, DNA-binding|Zinc finger, C2H2-like	Zfp771	1	1	0	0	921220	#DIV/0!
67846115	ZFP787	Zinc finger, C2H2-type|Zinc finger, C2H2-type/integrase, DNA-binding|Zinc finger, C2H2-like	Zfp787	1	1	0	0	251154	#DIV/0!
90669983	ZFP91	Zinc finger, C2H2-type|Zinc finger, C2H2-like	Zfp91	1	2	8.99578e+06	0	4.60851e+06	#DIV/0!
140969817	BPTF	Bromodomain, conserved site|Zinc finger, PHD-type, conserved site|Bromodomain|Zinc finger, PHD-type|DDT domain|DDT domain, subgroup|DDT domain superfamily|Zinc finger, PHD-finger	Bptf	3	3	0	312540	1.35792e+06	4.34477
8393627	IRF3	Interferon regulatory factor, conserved site|Interferon regulatory factor|SMAD/FHA domain|Winged helix-turn-helix transcription repressor DNA-binding|SMAD domain-like|Interferon regulatory factor-3	Irf3	2	10	3.45004e+06	414842	1.76914e+06	4.26462
40789094	ZHX2	Homeobox|Zinc finger, C2H2-type|Homeodomain-like|Homeodomain-related|Zinc finger, C2H2-like	Zhx2	2	3	7.71515e+06	850378	3.62467e+06	4.26242
91598896	MTA1	Zinc finger, GATA-type|ELM2|SANT, DNA-binding|Bromo adjacent homology (BAH) domain|Homeodomain-like|SANT, eukarya	Mta1	11	26	951639	1.44952e+06	5.12734e+06	3.53727
188497644	NOC3L	CCAAT-binding factor|Nucleolar complex-associated|Nucleolar complex-associated protein 3	Noc3l	4	9	2.87106e+06	670566	2.35668e+06	3.51447
74136557	ARID5B	ARID/BRIGHT DNA-binding domain	Arid5b	2	2	0	878008	2.54086e+06	2.89389
126352391	ZFP384	Zinc finger, C2H2-type|Zinc finger, C2H2-type/integrase, DNA-binding|Zinc finger, C2H2-like	Zfp384	5	26	7.96736e+06	3.59524e+06	9.91825e+06	2.75872
31044459	CTCF	Zinc finger, C2H2-type|Zinc finger, C2H2-type/integrase, DNA-binding|Zinc finger, C2H2-like	Ctcf	4	11	8.89401e+06	1.81645e+06	4.49884e+06	2.47672
145553997	ARID1B	ARID/BRIGHT DNA-binding domain|Protein of unknown function DUF3518	Arid1b	13	30	1.21584e+07	5.81347e+06	1.39256e+07	2.3954
153945804	FOXA2	Transcription factor, fork head, conserved site|Transcription factor, fork head|Winged helix-turn-helix transcription repressor DNA-binding|Fork-head N-terminal|Forkhead box protein, C-terminal	Foxa2	1	5	4.15245e+06	2.31936e+06	5.54842e+06	2.39222
71037397	RFX5	DNA-binding RFX|Winged helix-turn-helix transcription repressor DNA-binding	Rfx5	5	13	4.24073e+06	1.50183e+06	3.53333e+06	2.35269
67188876	CEBPZ	CCAAT-binding factor|Armadillo-type fold	Cebpz	5	9	1.28428e+07	4.36132e+06	1.00723e+07	2.30946
133904142	TERF2	SANT, DNA-binding|Homeodomain-like|Homeodomain-related|Telomere repeat-binding factor, dimerisation domain|Myb, DNA-binding|HTH transcriptional regulator, Myb-type, DNA-binding|Telomeric repeat-binding factor 1, Pin2	Terf2	9	23	5.53103e+06	4.8125e+06	1.0077e+07	2.09392
134032032	UBP1	CP2 transcription factor|Sterile alpha motif homology	Ubp1	8	31	2.16727e+07	6.37966e+06	1.26092e+07	1.97646
21313424	DRAP1	Transcription factor CBF/NF-Y/archaeal histone|Histone-fold	Drap1	2	6	9.05066e+06	3.36561e+06	6.59404e+06	1.95924
40254124	SMARCA5	SNF2-related|SANT, DNA-binding|DNA/RNA helicase, C-terminal|Homeodomain-like|DEAD-like helicase, N-terminal|Helicase, superfamily 1/2, ATP-binding domain|ATPase, nucleosome remodelling ISWI, HAND domain|SLIDE|SANT, eukarya	Smarca5	45	181	4.26918e+07	3.11509e+07	5.95825e+07	1.91271
164519134	GATAD2A	Zinc finger, GATA-type	Gatad2a	16	49	1.06137e+07	7.85268e+06	1.47377e+07	1.87677
86198301	CEBPA	Basic-leucine zipper (bZIP) transcription factor|Basic leucine zipper|CCAAT/enhancer-binding	Cebpa	4	14	5.32054e+06	5.68989e+06	1.02661e+07	1.80428
31542626	HMBOX1	Homeobox|Hepatocyte nuclear factor 1, N-terminal|Homeodomain-like|Lambda repressor-like, DNA-binding|Homeodomain-related	Hmbox1	8	20	3.64567e+07	5.10827e+06	8.73347e+06	1.70967
110225364	ZFHX3	Homeobox, conserved site|Homeobox|Zinc finger, U1-type|Zinc finger, C2H2-type|Homeodomain-like|Homeodomain-related|Zinc finger, C2H2-type/integrase, DNA-binding|Zinc finger, C2H2-like	Zfhx3	17	27	1.09063e+07	5.93866e+06	1.00268e+07	1.68839
21314854	GATAD2B	Zinc finger, GATA-type	Gatad2b	12	42	9.55739e+06	1.00591e+07	15773523	1.56808
10181166	SMARCE1	High mobility group, HMG1/HMG2|High mobility group, superfamily	Smarce1	21	95	4.89444e+07	2.7024e+07	4.17884e+07	1.54634
161016831	NFYA	CCAAT-binding factor, conserved site|CCAAT-binding transcription factor, subunit B	Nfya	3	20	1.21092e+07	1.1081e+07	1.70583e+07	1.53942
294979205	WIZ	Zinc finger, C2H2-type|Zinc finger, C2H2-like	Wiz	7	13	6.12673e+06	2.06376e+06	3.03618e+06	1.47119
6754608	MAFF	Maf transcription factor|Basic-leucine zipper (bZIP) transcription factor|Eukaryotic transcription factor, Skn-1-like, DNA-binding	Maff	2	3	0	8.51087e+06	1.24049e+07	1.45754
166706895	TOX4	High mobility group, HMG1/HMG2, subgroup|High mobility group, HMG1/HMG2|High mobility group, superfamily	Tox4	11	41	2.42517e+07	2.66321e+07	3.83276e+07	1.43915
46909569	GATA4	Zinc finger, GATA-type|GATA-type transcription activator, N-terminal|Zinc finger, NHR/GATA-type|Transcription factor GATA-4/5/6	Gata4	2	7	6.48066e+06	5.12087e+06	7.28568e+06	1.42274
160948575	TERF2IP	Homeodomain-like|Homeodomain-related|Rap1 Myb	Terf2ip	10	31	8.02904e+06	6.25045e+06	8.72311e+06	1.3956
124249109	ARID1A	ARID/BRIGHT DNA-binding domain|Protein of unknown function DUF3518	Arid1a	25	60	1.36845e+07	1.4843e+07	2.06285e+07	1.38978
40254249	NFRKB	-	Nfrkb	5	9	972173	1.69864e+06	2.34178e+06	1.37862
66955886	PDS5B	AT hook, DNA-binding motif|Armadillo-type fold	Pds5b	41	127	3.27124e+07	3.2408e+07	4.43251e+07	1.36772
119220568	ONECUT2	Homeobox|Homeodomain protein CUT|Homeodomain-like|Homeodomain-related	Onecut2	8	54	5.49969e+07	3.03711e+07	4.14643e+07	1.36525
6679042	NFIC	CTF transcription factor/nuclear factor 1, conserved site|MAD homology 1, Dwarfin-type|CTF transcription factor/nuclear factor 1, DNA-binding domain|CTF transcription factor/nuclear factor 1|CTF transcription factor/nuclear factor 1, N-terminal	Nfic	17	116	1.31816e+08	1.13322e+08	1.53569e+08	1.35516
126517474	NFIX	CTF transcription factor/nuclear factor 1, conserved site|MAD homology 1, Dwarfin-type|CTF transcription factor/nuclear factor 1, DNA-binding domain|CTF transcription factor/nuclear factor 1|CTF transcription factor/nuclear factor 1, N-terminal	Nfix	13	122	109980859	9.88714e+07	1.33484e+08	1.35008
159032064	SALL1	Zinc finger, C2H2-type|Zinc finger, C2H2-type/integrase, DNA-binding|Zinc finger, C2H2-like	Sall1	7	9	0	4.28284e+06	5.60908e+06	1.30966
166706891	TCF20	Zinc finger, PHD-type	Tcf20	5	9	2.97692e+06	2.73927e+06	3.50706e+06	1.28029
166235125	SMARCC2	Chromo domain|SANT, DNA-binding|BRCT|SWIRM|Homeodomain-like|Myb, DNA-binding|SANT, eukarya	Smarcc2	35	132	2.77451e+07	2.82644e+07	3.61223e+07	1.27801
114205435	BAZ2A	AT hook, DNA-binding motif|Bromodomain, conserved site|Bromodomain|Methyl-CpG DNA binding|Zinc finger, PHD-type|DDT domain|Zinc finger, FYVE/PHD-type|DNA-binding, integrase-type|DDT domain, subgroup|DDT domain superfamily|Zinc finger, PHD-finger	Baz2a	3	6	0	2.17392e+06	2.76547e+06	1.27211
171846256	NFIA	CTF transcription factor/nuclear factor 1, conserved site|MAD homology 1, Dwarfin-type|CTF transcription factor/nuclear factor 1, DNA-binding domain|CTF transcription factor/nuclear factor 1|CTF transcription factor/nuclear factor 1, N-terminal	Nfia	12	97	5.83794e+07	6.06172e+07	7.68383e+07	1.2676
22779899	CDC5L	SANT, DNA-binding|Homeodomain-like|Homeodomain-related|Myb, DNA-binding|HTH transcriptional regulator, Myb-type, DNA-binding|Myb transcription factor|Protein of unknown function DUF3351	Cdc5l	32	187	9.39371e+07	7.35153e+07	8.87602e+07	1.20737
51491880	MTA2	Zinc finger, GATA-type|ELM2|SANT, DNA-binding|Bromo adjacent homology (BAH) domain|SANT, eukarya	Mta2	20	84	2.4201e+07	1.96361e+07	2.35172e+07	1.19765
124286787	RBPJ	Cell surface receptor IPT/TIG|p53-like transcription factor, DNA-binding|Immunoglobulin-like fold|Immunoglobulin E-set|Beta-trefoil|LAG1, DNA binding	Rbpj	6	16	1.48451e+07	9.44945e+06	1.11563e+07	1.18063
38348308	RYBP	Zinc finger, RanBP2-type	Rybp	6	20	9.58223e+06	4.23536e+06	4.89031e+06	1.15464
226437608	GCFC1	GC-rich sequence DNA-binding factor-like	Paxbp1	12	24	1.10681e+07	1.08177e+07	1.24334e+07	1.14935
6756049	ZFP148	Zinc finger, C2H2-type|Zinc finger, C2H2-type/integrase, DNA-binding|Zinc finger, C2H2-like	Zfp148	2	2	0	1.79915e+06	1.99626e+06	1.10956
12963705	ELF2	Ets|Winged helix-turn-helix transcription repressor DNA-binding|Transcription factor Elf-1, N-terminal	Elf2	7	21	1.32989e+07	6.56131e+06	7.24678e+06	1.10447
158508460	AHCTF1	AT hook, DNA-binding motif	Ahctf1	75	463	1.77721e+08	1.80205e+08	1.98265e+08	1.10022
157384990	TFE3	Helix-loop-helix DNA-binding domain|Helix-loop-helix DNA-binding|Protein of unknown function DUF3371	Tfe3	12	47	8.33444e+07	6.51999e+07	7.14026e+07	1.09513
166295202	HNF1A	Homeobox|Hepatocyte nuclear factor 1, beta isoform, C-terminal|Hepatocyte nuclear factor 1, alpha isoform C-terminal|Hepatocyte nuclear factor 1, N-terminal|Homeodomain-like|Lambda repressor-like, DNA-binding|Homeodomain-related	Hnf1a	12	38	2.89117e+07	1.64757e+07	1.77124e+07	1.07507
300192993	DNAJC1	Heat shock protein DnaJ, conserved site|SANT, DNA-binding|Heat shock protein DnaJ, N-terminal|Homeodomain-like|Myb, DNA-binding|SANT, eukarya|Heat shock protein DnaJ|Molecular chaperone, heat shock protein, Hsp40, DnaJ	Dnajc1	2	3	0	1.5272e+06	1.6337e+06	1.06973
8393832	NFIL3	Basic-leucine zipper (bZIP) transcription factor|Vertebrate interleukin-3 regulated transcription factor|Basic leucine zipper|Transcription factor, basic leucine zipper, E4BP4	Nfil3	13	36	126047	1.15869e+07	1.2266e+07	1.05861
14010847	NR5A2	Nuclear hormone receptor, ligand-binding, core|Zinc finger, nuclear hormone receptor-type|Nuclear hormone receptor, ligand-binding|Zinc finger, NHR/GATA-type|Vitamin D receptor|Steroid hormone receptor|Orphan nuclear receptor Fushi-tarazu factor 1	Nr5a2	4	12	1.56203e+07	7.5126e+06	7.91979e+06	1.0542
6678303	TFAM	High mobility group, HMG1/HMG2|High mobility group, superfamily	Tfam	13	105	3.45e+08	2.32281e+08	2.44701e+08	1.05347
295424118	RREB1	Zinc finger, C2H2-type|Zinc finger, C2H2-type/integrase, DNA-binding|Zinc finger, C2H2-like	Rreb1	7	17	9.67859e+06	3.43971e+06	3.58081e+06	1.04102
15022805	HMG20A	High mobility group, HMG1/HMG2|High mobility group, superfamily	Hmg20a	2	5	5.7766e+06	5.33623e+06	5.54793e+06	1.03967
194328715	ZFP207	Zinc finger, C2H2-type|Zinc finger, C2H2-like	Zfp207	4	19	3.11462e+07	3.45155e+07	3.5465e+07	1.02751
257196201	ZBTB20	BTB/POZ-like|Zinc finger, C2H2-type|BTB/POZ fold|BTB/POZ|Zinc finger, C2H2-type/integrase, DNA-binding|Zinc finger, C2H2-like	Zbtb20	17	104	1.41605e+07	1.26913e+07	1.2906e+07	1.01691
112421097	SMARCC1	Chromo domain|SANT, DNA-binding|BRCT|SWIRM|Homeodomain-like|Myb, DNA-binding|SANT, eukarya	Smarcc1	23	66	2.09481e+07	2.19815e+07	2.1862e+07	0.994563
120587007	BCL11B	Zinc finger, C2H2-type|Zinc finger, C2H2-type/integrase, DNA-binding|Zinc finger, C2H2-like	Bcl11b	1	3	3.65995e+08	1.4523e+08	1.2892e+08	0.887698
153792362	ELK4	Ets|Winged helix-turn-helix transcription repressor DNA-binding	Elk4	9	19	5.98092e+06	2.19152e+07	1.89817e+07	0.866139
6753404	CEBPB	Basic-leucine zipper (bZIP) transcription factor|Basic leucine zipper|CCAAT/enhancer-binding	Cebpb	7	74	5.2236e+07	1.87944e+08	1.62547e+08	0.86487
257196177	ZNF512B	Zinc finger, C2H2-type|Zinc finger, C2H2-like	Znf512b	3	4	0	4.46402e+06	3.85066e+06	0.8626
6677659	DNAJC2	Heat shock protein DnaJ, conserved site|SANT, DNA-binding|Heat shock protein DnaJ, N-terminal|Homeodomain-like|Myb, DNA-binding|SANT, eukarya|Molecular chaperone, heat shock protein, Hsp40, DnaJ	Dnajc2	4	6	0	3.25811e+06	2.8057e+06	0.861143
6680241	ONECUT1	Homeobox|Homeodomain protein CUT|Homeodomain-like|Homeodomain-related	Onecut1	7	33	7.48029e+06	6.90477e+06	5.71857e+06	0.828206
172073171	TBP	Transcription factor TFIID, C-terminal/DNA glycosylase, N-terminal|Beta2-adaptin/TATA-box binding, C-terminal|TATA-box binding	Tbp	3	9	1.13952e+07	9.84409e+06	8.06911e+06	0.819691
6679627	ELF1	Ets|Winged helix-turn-helix transcription repressor DNA-binding|Transcription factor Elf-1, N-terminal	Elf1	3	9	4.23408e+06	2.04444e+06	1.64618e+06	0.8052
163965420	NFIB	CTF transcription factor/nuclear factor 1, conserved site|MAD homology 1, Dwarfin-type|CTF transcription factor/nuclear factor 1, DNA-binding domain|CTF transcription factor/nuclear factor 1|CTF transcription factor/nuclear factor 1, N-terminal	Nfib	14	90	5.41029e+07	5.07668e+07	4.0499e+07	0.797746
33859684	KIN	Zinc finger, C2H2-like|DNA/RNA-binding protein Kin17, conserved region	Kin	5	7	4.11828e+06	3.59871e+06	2.84542e+06	0.790678
114326538	NFYC	Transcription factor CBF/NF-Y/archaeal histone|Histone-fold	Nfyc	4	14	3.43286e+07	3.45828e+07	2.5416e+07	0.734931
26787989	MRPL28	p53-like transcription factor, DNA-binding	Mrpl28	2	8	4.97983e+06	3.98431e+06	2.71893e+06	0.682409
262205246	TEAD1	TEA/ATTS|Transcriptional enhancer factor	Tead1	7	29	3.047e+07	2.99857e+07	2.03944e+07	0.680136
6680231	HMGB3	HMG box A DNA-binding domain, conserved site|High mobility group, HMG1/HMG2, subgroup|High mobility group, HMG1/HMG2|High mobility group, superfamily	Hmgb3	2	4	1.84634e+07	17944314	1.13124e+07	0.630416
6754850	NFYB	Transcription factor, NFYB/HAP3, conserved site|Transcription factor CBF/NF-Y/archaeal histone|Histone-fold|Transcription factor, CBFA/NFYB, DNA topoisomerase	Nfyb	2	4	3.64909e+07	40651514	2.54451e+07	0.625934
255982546	NRF1	Nuclear respiratory factor-1, activation binding domain|Nuclear respiratory factor 1, NLS/DNA-binding, dimerisation domain	Nrf1	2	5	3.46179e+06	6.32526e+06	3.88664e+06	0.614463
41406074	HMGN1	High mobility group protein HMG14/HMG17	Hmgn1	3	12	4.0139e+07	3.16658e+07	9.70566e+06	0.306502
133778915	HMGN5	High mobility group protein HMG14/HMG17	Hmgn5	11	26	5.02844e+06	3.11181e+07	4.69026e+06	0.150725
262231796	ARID2	ARID/BRIGHT DNA-binding domain|DNA-binding RFX|Zinc finger, C2H2-type|Winged helix-turn-helix transcription repressor DNA-binding|Zinc finger, C2H2-like	Arid2	2	2	0	1.34517e+06	0	0
34328117	FOSL2	Basic-leucine zipper (bZIP) transcription factor|bZIP transcription factor, bZIP-1|Fos transforming protein	Fosl2	1	2	2.32291e+06	1.39938e+06	0	0
262331578	HMGA1	HMG-I/HMG-Y, DNA-binding, conserved site|AT hook, DNA-binding motif|High mobility group, HMG-I/HMG-Y|A.T hook-like	Hmga1	4	20	1.26224e+08	4.09055e+07	0	0
111185900	HNF1B	Homeobox|Hepatocyte nuclear factor 1, beta isoform, C-terminal|Hepatocyte nuclear factor 1, N-terminal|Homeodomain-like|Lambda repressor-like, DNA-binding|Homeodomain-related	Hnf1b	2	3	0	1.97663e+06	0	0
218931192	TCF7L2	High mobility group, HMG1/HMG2|High mobility group, superfamily|CTNNB1 binding, N-teminal	Tcf7l2	2	5	3.16088e+06	1.583e+06	0	0
196049391	TEAD3	TEA/ATTS|Transcriptional enhancer factor	Tead3	3	13	778615	575807	0	0
239835744	TFEB	Helix-loop-helix DNA-binding domain|Helix-loop-helix DNA-binding|Protein of unknown function DUF3371	Tfeb	5	14	0	825438	0	0
21312242	ZFP655	Zinc finger, C2H2-type|Zinc finger, C2H2-type/integrase, DNA-binding|Zinc finger, C2H2-like	Zfp655	1	2	4.6803e+06	815010	0	0
109627663	ZHX1	Homeobox|Zinc finger, C2H2-type|Homeodomain-like|Homeodomain-related|Zinc finger, C2H2-like	Zhx1	1	1	0	718040	0	0
125625318	SP2	Zinc finger, C2H2-type|Zinc finger, C2H2-type/integrase, DNA-binding|Zinc finger, C2H2-like	Sp2	4	10	299996	487138	0	0
19745144	CREB1	Coactivator CBP, pKID|Basic-leucine zipper (bZIP) transcription factor|bZIP transcription factor, bZIP-1|cAMP response element binding (CREB) protein	Creb1	3	9	155761	975935	0	0

## Sheet: Pck1p #1 insulin
Accession	Gene	90057	90058	90059	90060	No Tx	Dex/cAMP	D/C/I	D/C/I to D/C
54112427	AEBP2	0	0	0	0	0	0	0	#DIV/0!
26024213	ARX	0	0	0	0	0	0	0	#DIV/0!
7710022	BCL11A	0	0	0	0	0	0	0	#DIV/0!
120586999	BCL11B	0	0	0	0	0	0	0	#DIV/0!
67188876	CEBPZ	0	1.51271e+06	0	0	1.51271e+06	0	0	#DIV/0!
37718989	GMEB2	0	0	0	0	0	0	0	#DIV/0!
124107625	HIVEP3	0	0	0	0	0	0	0	#DIV/0!
120300925	HOXB3	0	0	0	0	0	0	0	#DIV/0!
122114637	IKZF4	0	9.31727e+07	0	0	9.31727e+07	0	0	#DIV/0!
8393627	IRF3	0	5.07978e+06	0	0	5.07978e+06	0	0	#DIV/0!
55741685	IRX3	0	0	0	0	0	0	0	#DIV/0!
6754402	JUN	0	0	0	0	0	0	0	#DIV/0!
33859684	KIN	0	0	0	0	0	0	0	#DIV/0!
117606364	NFKB1	0	983401	0	0	983401	0	0	#DIV/0!
188497644	NOC3L	0	1.18804e+06	0	0	1.18804e+06	0	0	#DIV/0!
73611910	NR2F2	0	4.98361e+06	0	0	4.98361e+06	0	0	#DIV/0!
7110681	PBX1	0	2931527	0	0	2931527	0	0	#DIV/0!
47059067	POU4F2	0	0	0	0	0	0	0	#DIV/0!
295789156	PRDM16	0	1.15553e+07	0	0	1.15553e+07	0	0	#DIV/0!
6679483	PROX1	0	560627	0	0	560627	0	0	#DIV/0!
88703055	RFX7	0	0	0	0	0	0	0	#DIV/0!
255683435	SKOR1	0	0	0	0	0	0	0	#DIV/0!
117606322	SOX1	0	0	0	0	0	0	0	#DIV/0!
127140986	SOX2	0	0	0	0	0	0	0	#DIV/0!
6755907	TWIST1	0	0	0	0	0	0	0	#DIV/0!
23346597	TCFAP2D	39016358	1.24285e+07	0	3.37915e+07	0	0	0	#DIV/0!
254553274	ZFP746	0	0	0	0	0	0	0	#DIV/0!
6753172	BCL6	0	0	1.12111e+08	0	0	1.12111e+08	0	0
300192993	DNAJC1	0	0	700593	0	0	700593	0	0
6677659	DNAJC2	0	1.16069e+06	2.76817e+06	0	1.16069e+06	2.76817e+06	0	0
21313424	DRAP1	0	0	9.9312e+06	0	0	9.9312e+06	0	0
67972650	E2F8	0	0	3.47975e+07	0	0	3.47975e+07	0	0
12963705	ELF2	0	0	2.40231e+06	0	0	2.40231e+06	0	0
153792362	ELK4	0	0	2.2568e+06	0	0	2.2568e+06	0	0
157057552	EN1	0	0	1.95448e+06	0	0	1.95448e+06	0	0
238018071	FOXK2	0	0	1.73654e+06	0	0	1.73654e+06	0	0
34328255	FOXO1	0	0	1.24393e+06	0	0	1.24393e+06	0	0
164519134	GATAD2A	0	1.96547e+06	2.45819e+07	0	1.96547e+06	2.45819e+07	0	0
21314854	GATAD2B	0	0	1.78143e+07	0	0	1.78143e+07	0	0
70887767	HIC2	0	0	1.65576e+06	0	0	1.65576e+06	0	0
262331511	HMGA1	0	0	2.17327e+07	0	0	2.17327e+07	0	0
6680231	HMGB3	0	0	2.87004e+07	0	0	2.87004e+07	0	0
133778915	HMGN5	0	0	2.69634e+06	0	0	2.69634e+06	0	0
6754608	MAFF	0	0	1.08686e+06	0	0	1.08686e+06	0	0
162287033	MNT	0	0	332658	0	0	332658	0	0
26787989	MRPL28	0	0	3964915	0	0	3964915	0	0
171846245	NR2C1	0	0	4.63841e+06	0	0	4.63841e+06	0	0
67906168	NR2C2	0	0	8.21435e+06	0	0	8.21435e+06	0	0
255982548	NRF1	0	0	8.97508e+06	0	0	8.97508e+06	0	0
119220568	ONECUT2	0	5.13859e+06	1.08246e+06	0	5.13859e+06	1.08246e+06	0	0
124286785	RBPJ	0	0	1.85948e+07	0	0	1.85948e+07	0	0
71037397	RFX5	0	0	9.31826e+06	0	0	9.31826e+06	0	0
38348308	RYBP	0	0	3.83203e+06	0	0	3.83203e+06	0	0
31543224	SMAD4	0	0	598549	0	0	598549	0	0
125625320	SP2	0	0	333889	0	0	333889	0	0
15628025	TCFCP2	0	0	2.19708e+07	0	0	2.19708e+07	0	0
134053939	TCFCP2L1	0	0	1.22608e+06	0	0	1.22608e+06	0	0
6678303	TFAM	0	2.27914e+07	7.65048e+07	0	2.27914e+07	7.65048e+07	0	0
7305605	UBP1	0	0	3.39866e+07	0	0	3.39866e+07	0	0
13775156	XBP1	0	0	2.05356e+06	0	0	2.05356e+06	0	0
13386064	YEATS4	0	0	4.03846e+06	0	0	4.03846e+06	0	0
31982421	YY1	0	0	1.05941e+07	0	0	1.05941e+07	0	0
117606328	ZBTB44	0	2.01453e+06	2.26036e+06	0	2.01453e+06	2.26036e+06	0	0
117647238	ZBTB7A	0	0	1.93935e+06	0	0	1.93935e+06	0	0
254553392	ZFP512	0	0	6.20091e+06	0	0	6.20091e+06	0	0
133904142	TERF2	0	958047	1.06059e+07	586376	958047	1.06059e+07	586376	0.0552875
295844817	MITF	0	2.24346e+07	5.0873e+07	1.31281e+07	2.24346e+07	5.0873e+07	1.31281e+07	0.258057
12963557	DMAP1	0	0	4.9055e+06	1.72013e+06	0	4.9055e+06	1.72013e+06	0.350653
31542626	HMBOX1	0	1.75949e+07	1.81727e+07	6.53759e+06	1.75949e+07	1.81727e+07	6.53759e+06	0.359748
46909571	GATA6	0	0	3.97712e+06	1.4508e+06	0	3.97712e+06	1.4508e+06	0.364787
126352391	ZFP384	0	0	4.83534e+06	1.87774e+06	0	4.83534e+06	1.87774e+06	0.388337
166295202	HNF1A	0	2.57179e+07	1.63163e+07	9.34701e+06	2.57179e+07	1.63163e+07	9.34701e+06	0.572864
8393832	NFIL3	0	1.58303e+07	4.98192e+07	3.83935e+07	1.58303e+07	4.98192e+07	3.83935e+07	0.770657
160948575	TERF2IP	0	4.93669e+06	5.61524e+06	4.35664e+06	4.93669e+06	5.61524e+06	4.35664e+06	0.77586
283806541	MTA3	0	0	3.12284e+07	2.42599e+07	0	3.12284e+07	2.42599e+07	0.776854
91598896	MTA1	0	0	2.99699e+07	2.42599e+07	0	2.99699e+07	2.42599e+07	0.809474
172073171	TBP	0	0	1.49927e+07	1.55931e+07	0	1.49927e+07	1.55931e+07	1.04005
40789094	ZHX2	0	1.24266e+07	1.13877e+07	1.19054e+07	1.24266e+07	1.13877e+07	1.19054e+07	1.04545
51491880	MTA2	0	0	4.22412e+07	4.59416e+07	0	4.22412e+07	4.59416e+07	1.0876
150010617	ZKSCAN16	0	0	1.94242e+06	2.25454e+06	0	1.94242e+06	2.25454e+06	1.16068
6754836	NFIA	0	5.54402e+07	6.10071e+07	7.77576e+07	5.54402e+07	6.10071e+07	7.77576e+07	1.27457
163965422	NFIB	0	4.54537e+07	5.91212e+07	7.62816e+07	4.54537e+07	5.91212e+07	7.62816e+07	1.29026
86198301	CEBPA	0	3.68933e+07	2.04781e+07	4.24515e+07	3.68933e+07	2.04781e+07	4.24515e+07	2.07302
84370351	NFIC	0	9.46808e+07	4.98773e+07	1.06804e+08	9.46808e+07	4.98773e+07	1.06804e+08	2.14133
158508460	AHCTF1	0	1.85655e+07	3.55219e+07	8.83147e+07	1.85655e+07	3.55219e+07	8.83147e+07	2.4862
145553997	ARID1B	0	3.19291e+06	4.83069e+06	1.27439e+07	3.19291e+06	4.83069e+06	1.27439e+07	2.63812
126517487	NFIX	0	6.56768e+07	3.13499e+07	8.5177e+07	6.56768e+07	3.13499e+07	8.5177e+07	2.71698
126517474	NFIX	0	6.56768e+07	3.13499e+07	8.5177e+07	6.56768e+07	3.13499e+07	8.5177e+07	2.71698
159032064	SALL1	0	0	1.6022e+06	5.49265e+06	0	1.6022e+06	5.49265e+06	3.42818
114431256	POU2F1	0	2.24095e+06	628419	2.15975e+06	2.24095e+06	628419	2.15975e+06	3.4368
82546826	FOXK1	0	2.37443e+06	2.97876e+06	1.2147e+07	2.37443e+06	2.97876e+06	1.2147e+07	4.07787
6756049	ZFP148	0	8.99612e+06	2.6377e+06	1.10863e+07	8.99612e+06	2.6377e+06	1.10863e+07	4.203
22779899	CDC5L	0	4.48035e+07	8.04144e+06	4.41167e+07	4.48035e+07	8.04144e+06	4.41167e+07	5.48617
166706895	TOX4	0	6.87319e+07	7.13586e+06	4.71147e+07	6.87319e+07	7.13586e+06	4.71147e+07	6.60252
257196203	ZBTB20	0	3.75454e+07	6.23297e+06	4.99769e+07	3.75454e+07	6.23297e+06	4.99769e+07	8.01815
6753404	CEBPB	0	4.05623e+06	3.70916e+07	3.92634e+08	4.05623e+06	3.70916e+07	3.92634e+08	10.5855
40254124	SMARCA5	0	4.88405e+07	3.91521e+06	4.3588e+07	4.88405e+07	3.91521e+06	4.3588e+07	11.133
113205057	UBTF	0	3.19192e+07	3.09297e+06	3.72011e+07	3.19192e+07	3.09297e+06	3.72011e+07	12.0276
46909569	GATA4	0	2.37219e+07	1.39648e+06	1.90199e+07	2.37219e+07	1.39648e+06	1.90199e+07	13.6199
117414176	VEZF1	0	0	2.28222e+06	4.23861e+07	0	2.28222e+06	4.23861e+07	18.5723
110225364	ZFHX3	0	2.5665e+06	471557	1.06109e+07	2.5665e+06	471557	1.06109e+07	22.5019
37718972	SMARCC2	0	3.60277e+07	1.65541e+06	6.94021e+07	3.60277e+07	1.65541e+06	6.94021e+07	41.9245
166706889	TCF20	0	0	0	159321	0	1000	159321	159.321
66955886	PDS5B	0	5.16966e+06	427962	8.94555e+07	5.16966e+06	427962	8.94555e+07	209.027
38327623	TBX3	0	703005	0	554729	703005	0	554729	#DIV/0!
254675249	SMAD3	0	3.81484e+06	0	675936	3.81484e+06	0	675936	#DIV/0!
31981130	KLF13	0	0	0	777365	0	0	777365	#DIV/0!
295424118	RREB1	0	0	0	906167	0	0	906167	#DIV/0!
6680582	KLF3	0	0	0	981311	0	0	981311	#DIV/0!
119226255	SP1	0	0	0	1.11413e+06	0	0	1.11413e+06	#DIV/0!
110835729	CUX1	0	0	0	1.13795e+06	0	0	1.13795e+06	#DIV/0!
114155153	MAZ	0	0	0	1.19168e+06	0	0	1.19168e+06	#DIV/0!
7106459	CLOCK	0	550914	0	1.22136e+06	550914	0	1.22136e+06	#DIV/0!
161169031	RUNX1	0	2.49063e+06	0	1.22304e+06	2.49063e+06	0	1.22304e+06	#DIV/0!
298676444	TADA2B	0	0	0	1.22995e+06	0	0	1.22995e+06	#DIV/0!
262231796	ARID2	0	0	0	1.33108e+06	0	0	1.33108e+06	#DIV/0!
170932488	RBL2	0	0	0	1.37754e+06	0	0	1.37754e+06	#DIV/0!
74136557	ARID5B	0	0	0	1.40076e+06	0	0	1.40076e+06	#DIV/0!
15022805	HMG20A	0	1.04288e+06	0	1.53133e+06	1.04288e+06	0	1.53133e+06	#DIV/0!
153945804	FOXA2	0	0	0	1.73164e+06	0	0	1.73164e+06	#DIV/0!
90093349	ADNP	0	0	0	1.77234e+06	0	0	1.77234e+06	#DIV/0!
40254321	ZHX3	0	2.66081e+06	0	1.85625e+06	2.66081e+06	0	1.85625e+06	#DIV/0!
6678521	USF1	0	3.71061e+06	0	2.12591e+06	3.71061e+06	0	2.12591e+06	#DIV/0!
253683481	HMG20B	0	0	0	2.20054e+06	0	0	2.20054e+06	#DIV/0!
188528630	RB1	0	3.77534e+06	0	3.0863e+06	3.77534e+06	0	3.0863e+06	#DIV/0!
229335598	NR5A2	0	8.48497e+06	0	3.12651e+06	8.48497e+06	0	3.12651e+06	#DIV/0!
257196177	ZNF512B	0	0	0	3.28329e+06	0	0	3.28329e+06	#DIV/0!
161086933	CREM	0	0	0	3.371e+06	0	0	3.371e+06	#DIV/0!
8567384	PBX2	0	2.63993e+06	0	3.86139e+06	2.63993e+06	0	3.86139e+06	#DIV/0!
112293262	ESRRA	0	5.84671e+06	0	3.87535e+06	5.84671e+06	0	3.87535e+06	#DIV/0!
83523736	E2F3	0	5.03254e+06	0	4.24046e+06	5.03254e+06	0	4.24046e+06	#DIV/0!
13626034	TCFAP4	0	1.22569e+07	0	5.01916e+06	1.22569e+07	0	5.01916e+06	#DIV/0!
6678305	TFDP1	0	3.14627e+06	0	5.86271e+06	3.14627e+06	0	5.86271e+06	#DIV/0!
121949821	ATF4	0	4.28102e+06	0	6.30184e+06	4.28102e+06	0	6.30184e+06	#DIV/0!
124487069	CTCFL	0	0	0	6.83536e+06	0	0	6.83536e+06	#DIV/0!
40254249	NFRKB	0	0	0	6.96822e+06	0	0	6.96822e+06	#DIV/0!
46575916	HNF4A	0	5.81784e+06	0	7.4062e+06	5.81784e+06	0	7.4062e+06	#DIV/0!
31044421	MIS18BP1	0	0	0	7.47204e+06	0	0	7.47204e+06	#DIV/0!
20806532	CSDA	0	1.43113e+07	0	8.49401e+06	1.43113e+07	0	8.49401e+06	#DIV/0!
294979205	WIZ	0	9.30271e+06	0	8.50966e+06	9.30271e+06	0	8.50966e+06	#DIV/0!
125656178	ZFHX4	0	2.5665e+06	0	9.28442e+06	2.5665e+06	0	9.28442e+06	#DIV/0!
113205059	YBX1	0	2.51154e+07	0	1.45681e+07	2.51154e+07	0	1.45681e+07	#DIV/0!
124249109	ARID1A	0	967450	0	1.4709e+07	967450	0	1.4709e+07	#DIV/0!
262205252	TEAD1	0	2.76416e+07	0	2.68023e+07	2.76416e+07	0	2.68023e+07	#DIV/0!
113866026	GLIS3	0	0	0	3.16324e+07	0	0	3.16324e+07	#DIV/0!
10181166	SMARCE1	0	4.0439e+07	0	4.224e+07	4.0439e+07	0	4.224e+07	#DIV/0!
112421097	SMARCC1	0	7.65483e+06	0	5.24244e+07	7.65483e+06	0	5.24244e+07	#DIV/0!

## Sheet: Pck1p #2 insulin
Accession	Gene	ΣPSM	90065	90066	90067	90068	No Tx	Dex/cAMP	D/C/I	D/C/I to D/C
255958266	BARHL1	1	0	1.53136e+07	0	0	1.53136e+07	0	0	#DIV/0!
11230810	FOXJ2	1	0	822100	0	0	822100	0	0	#DIV/0!
295148122	HOMEZ	1	0	0	0	0	0	0	0	#DIV/0!
182764439	HOXA10	1	0	0	0	0	0	0	0	#DIV/0!
6680512	JUNB	1	0	1.76748e+06	0	0	1.76748e+06	0	0	#DIV/0!
84872225	MIER1	1	0	669786	0	0	669786	0	0	#DIV/0!
56785426	MIER2	1	3.98342e+07	0	0	0	0	0	0	#DIV/0!
134288853	NOTCH2	1	0	0	0	0	0	0	0	#DIV/0!
67906168	NR2C2	1	0	1.22717e+06	0	0	1.22717e+06	0	0	#DIV/0!
73611910	NR2F2	1	0	3.13536e+06	0	0	3.13536e+06	0	0	#DIV/0!
40538836	ONECUT3	2	0	4.56843e+06	0	0	4.56843e+06	0	0	#DIV/0!
113205055	SKI	1	2.31743e+06	0	0	0	0	0	0	#DIV/0!
6755604	SOX17	1	0	0	0	0	0	0	0	#DIV/0!
119226255	SP1	1	0	5.94602e+06	0	0	5.94602e+06	0	0	#DIV/0!
125625320	SP2	2	0	0	0	0	0	0	0	#DIV/0!
27753981	SREBF1	1	0	0	0	0	0	0	0	#DIV/0!
128485774	STAT6	1	0	361482	0	0	361482	0	0	#DIV/0!
120407039	TBX2	4	2.17227e+07	3.03155e+06	2.35959e+06	2.10167e+07	0	0	0	#DIV/0!
255918166	TCF3	1	0	460852	0	0	460852	0	0	#DIV/0!
23346597	TCFAP2D	3	3.77668e+07	2.40398e+07	18270238	0	0	0	0	#DIV/0!
31982421	YY1	21	1.63799e+07	1.69066e+07	1.37348e+07	6.58448e+06	526637	0	0	#DIV/0!
126366001	ZBTB48	1	1175963	0	0	0	0	0	0	#DIV/0!
7304873	AHR	4	0	1.47174e+06	985786	0	1.47174e+06	985786	0	0
74136557	ARID5B	8	0	0	8.4049e+06	0	0	8.4049e+06	0	0
86604724	ATF1	4	2.35475e+06	4.26144e+06	7.60095e+06	0	1.90669e+06	5.2462e+06	0	0
13385296	BZW1	1	0	0	2.42801e+06	0	0	2.42801e+06	0	0
67188876	CEBPZ	2	742434	0	1.88465e+06	0	0	1.14222e+06	0	0
240255574	CSDE1	11	2.17016e+06	4.5267e+06	8019089	0	2.35655e+06	5.84893e+06	0	0
12963557	DMAP1	5	0	4.56416e+06	6.60118e+06	0	4.56416e+06	6.60118e+06	0	0
57242788	DZIP1	1	0	0	1.34795e+08	0	0	1.34795e+08	0	0
83523736	E2F3	4	0	710936	1.33768e+06	0	710936	1.33768e+06	0	0
34610227	FOXO6	3	0	414636	2.85831e+06	0	414636	2.85831e+06	0	0
46909569	GATA4	17	1.61769e+06	30076936	2.42173e+07	2.00622e+07	2.84592e+07	2.25996e+07	0	0
6753952	GBX2	1	0	0	4.25434e+07	0	0	4.25434e+07	0	0
15022805	HMG20A	2	0	3.06145e+06	3.71723e+06	0	3.06145e+06	3.71723e+06	0	0
133778915	HMGN5	1	0	0	432832	0	0	432832	0	0
46575916	HNF4A	2	0	2.7725e+06	4.23811e+06	0	2.7725e+06	4.23811e+06	0	0
6754402	JUN	1	0	0	1.23833e+06	0	0	1.23833e+06	0	0
6754404	JUND	2	0	6.99819e+06	8.19161e+06	0	6.99819e+06	8.19161e+06	0	0
31981130	KLF13	4	2.38038e+06	1.96446e+06	3.92288e+06	0	0	1.5425e+06	0	0
255759880	LMX1B	2	0	0	5.02041e+06	0	0	5.02041e+06	0	0
26787989	MRPL28	4	0	4.87796e+06	6.01984e+06	0	4.87796e+06	6.01984e+06	0	0
121247453	NR3C1	1	0	0	508823	0	0	508823	0	0
188528630	RB1	7	908544	7.45826e+06	5.72563e+06	0	6.54971e+06	4.81708e+06	0	0
22094115	STAT3	3	1.68349e+06	1.22086e+07	6.29214e+06	0	1.05251e+07	4.60865e+06	0	0
298676444	TADA2B	7	1.1466e+07	1.09462e+07	2.2233e+07	4.34109e+06	0	1.0767e+07	0	0
13626034	TCFAP4	5	0	1.57189e+07	7.05701e+06	0	1.57189e+07	7.05701e+06	0	0
113205059	YBX1	15	1.61818e+07	2.11115e+07	2.86723e+07	1.17193e+07	4.92968e+06	1.24905e+07	0	0
117606328	ZBTB44	3	0	1.31176e+06	3379799	0	1.31176e+06	3379799	0	0
85701534	ZBTB45	36	1.63485e+07	5.09201e+07	4.53559e+07	1.25891e+07	3.45716e+07	2.90074e+07	0	0
117647238	ZBTB7A	2	0	6.95316e+06	8.86607e+06	0	6.95316e+06	8.86607e+06	0	0
121247390	ZFP143	5	6.08304e+06	4.13561e+06	9660723	0	0	3.57768e+06	0	0
6678637	ZFP161	1	0	0	2.17856e+08	0	0	2.17856e+08	0	0
165377130	ZFP276	1	0	0	2.35835e+06	0	0	2.35835e+06	0	0
40254321	ZHX3	3	0	3.79302e+06	4.26471e+06	0	3.79302e+06	4.26471e+06	0	0
257196177	ZNF512B	2	0	1.32014e+06	5.25403e+06	0	1.32014e+06	5.25403e+06	0	0
283806541	MTA3	13	4.60816e+06	1.92869e+07	2.86123e+07	5.38971e+06	1.46787e+07	2.40042e+07	781545	0.0325587
91598896	MTA1	15	4.60816e+06	1.77776e+07	2.17809e+07	5.2527e+06	1.31694e+07	1.71727e+07	644544	0.0375329
6678303	TFAM	36	6.3648e+06	1.28359e+08	1.59661e+08	1.49782e+07	1.21994e+08	1.53297e+08	8.61338e+06	0.0561876
209862973	SSRP1	10	3.02531e+06	3.42832e+06	3.43386e+06	3.07823e+06	403002	408546	52911.5	0.129512
6756049	ZFP148	37	6.20388e+06	29827964	2.21382e+07	8.93126e+06	2.36241e+07	1.59344e+07	2.72737e+06	0.171163
38327623	TBX3	9	0	2.05372e+06	1.63988e+06	333949	2.05372e+06	1.63988e+06	333949	0.203642
112293262	ESRRA	6	0	5747006	1.11923e+07	2.56818e+06	5747006	1.11923e+07	2.56818e+06	0.229461
254553392	ZFP512	17	2.45873e+06	1.19081e+07	1.37833e+07	5.21977e+06	9.44935e+06	1.13246e+07	2.76104e+06	0.24381
172073171	TBP	11	0	1.2072e+07	1.54842e+07	3.93886e+06	1.2072e+07	1.54842e+07	3.93886e+06	0.25438
110225364	ZFHX3	18	0	5.35847e+06	3.16729e+07	8.37525e+06	5.35847e+06	3.16729e+07	8.37525e+06	0.26443
6677659	DNAJC2	2	0	0	2.80623e+06	747071	0	2.80623e+06	747071	0.266219
229335598	NR5A2	7	0	4.61718e+06	5.24873e+06	1.49219e+06	4.61718e+06	5.24873e+06	1.49219e+06	0.284295
113205057	UBTF	52	4.513e+06	5.41358e+07	4.36891e+07	1.58943e+07	4.96228e+07	3.91761e+07	1.13813e+07	0.290516
163937838	NFAT5	6	0	0	4.5645e+06	1.33382e+06	0	4.5645e+06	1.33382e+06	0.292215
257196203	ZBTB20	215	1.08712e+08	4.59772e+08	5.46401e+08	2.37571e+08	3.5106e+08	4.37689e+08	1.28859e+08	0.294407
40789094	ZHX2	21	1.76678e+06	1.4181e+07	1.39925e+07	5.48794e+06	1.24142e+07	1.22258e+07	3.72116e+06	0.30437
40254124	SMARCA5	126	1.00129e+07	5.49983e+07	7.44786e+07	3.19084e+07	4.49854e+07	6.44657e+07	2.18955e+07	0.339646
6679483	PROX1	8	869462	0	5.05211e+06	2.31976e+06	0	4.18265e+06	1.4503e+06	0.346741
255982548	NRF1	7	0	8.6097e+06	1.64305e+07	5.81881e+06	8.6097e+06	1.64305e+07	5.81881e+06	0.354148
6753404	CEBPB	112	0	7.32332e+07	3.54174e+08	1.26633e+08	7.32332e+07	3.54174e+08	1.26633e+08	0.357545
159032064	SALL1	10	0	0	4.59584e+06	1.64401e+06	0	4.59584e+06	1.64401e+06	0.357718
126352391	ZFP384	20	887732	5.57965e+06	1.33286e+07	6.29643e+06	4.69192e+06	1.24409e+07	5.4087e+06	0.434751
239916007	RFX1	4	0	0	2.27861e+06	1.02321e+06	0	2.27861e+06	1.02321e+06	0.449049
40254249	NFRKB	18	494682	1.67963e+06	5.58469e+06	2.84585e+06	1.18495e+06	5.09001e+06	2.35117e+06	0.461918
133904140	TERF2	19	0	7.24914e+06	1.57022e+07	7.26397e+06	7.24914e+06	1.57022e+07	7.26397e+06	0.462609
114326538	NFYC	4	0	2.7457e+06	8.95849e+06	4.17327e+06	2.7457e+06	8.95849e+06	4.17327e+06	0.465845
124249109	ARID1A	22	0	4.25002e+06	8.42086e+06	4.00212e+06	4.25002e+06	8.42086e+06	4.00212e+06	0.475263
46909563	WIZ	16	0	9.1918e+06	1.33715e+07	6.35721e+06	9.1918e+06	1.33715e+07	6.35721e+06	0.475428
47059078	ZFP191	2	0	0	1.33314e+06	675349	0	1.33314e+06	675349	0.506586
114431256	POU2F1	5	0	2.58732e+06	2.74988e+06	1.3968e+06	2.58732e+06	2.74988e+06	1.3968e+06	0.507949
86198301	CEBPA	16	0	2.96361e+07	4.12651e+07	2.14949e+07	2.96361e+07	4.12651e+07	2.14949e+07	0.520898
158508460	AHCTF1	281	1.1504e+07	1.16953e+08	1.48915e+08	8.49178e+07	1.05449e+08	1.37411e+08	7.34138e+07	0.534265
21314854	GATAD2B	27	1.39415e+06	1.79363e+07	2.1661e+07	1.22505e+07	1.65421e+07	2.02669e+07	1.08563e+07	0.535668
6754832	NFE2L2	5	0	6.4664e+06	7.52401e+06	4.09588e+06	6.4664e+06	7.52401e+06	4.09588e+06	0.544375
22779899	CDC5L	84	9.6554e+06	5.03199e+07	6.40009e+07	3.95785e+07	4.06645e+07	5.43455e+07	2.99231e+07	0.550608
126517487	NFIX	59	4753774	1.52824e+08	1.75138e+08	1.00771e+08	1.4807e+08	1.70385e+08	9.60169e+07	0.563531
6678305	TFDP1	7	0	4.43952e+06	5.6698e+06	3.229e+06	4.43952e+06	5.6698e+06	3.229e+06	0.569509
209447068	ZFP609	4	0	2.67366e+06	3.30896e+06	1.89319e+06	2.67366e+06	3.30896e+06	1.89319e+06	0.572142
126517474	NFIX	67	4753774	1.32153e+08	1.68947e+08	1.00771e+08	1.27399e+08	1.64193e+08	9.60169e+07	0.584781
8393832	NFIL3	95	4.74868e+06	5.70492e+07	2.07336e+08	1.23359e+08	5.23005e+07	2.02588e+08	1.1861e+08	0.585476
262205246	TEAD1	20	0	1.31336e+07	1.458e+07	8.70511e+06	1.31336e+07	1.458e+07	8.70511e+06	0.597058
51491880	MTA2	55	4.26016e+06	3.54451e+07	4.50198e+07	2.93693e+07	3.1185e+07	4.07597e+07	2.51091e+07	0.616029
6680231	HMGB3	4	0	4.90173e+07	1.9295e+07	1.18987e+07	4.90173e+07	1.9295e+07	1.18987e+07	0.616674
166706895	TOX4	42	2.17642e+06	5.81444e+07	6.13818e+07	4.22426e+07	5.59679e+07	5.92054e+07	4.00662e+07	0.676731
134032032	UBP1	28	0	3.71778e+07	4.06176e+07	2.98521e+07	3.71778e+07	4.06176e+07	2.98521e+07	0.734954
71037381	ZBTB43	4	0	6.02689e+06	4.30555e+06	3.17665e+06	6.02689e+06	4.30555e+06	3.17665e+06	0.737804
84370351	NFIC	87	5.84445e+06	1.33471e+08	1.55826e+08	1.22581e+08	1.27626e+08	1.49982e+08	1.16737e+08	0.778339
10181166	SMARCE1	37	1.82747e+06	1.79288e+07	4.16495e+07	3.28279e+07	1.61013e+07	3.98221e+07	3.10004e+07	0.778473
145553997	ARID1B	27	0	3.04527e+06	9.79147e+06	7.87226e+06	3.04527e+06	9.79147e+06	7.87226e+06	0.803992
164519134	GATAD2A	36	1.3919e+06	1.75849e+07	1.67026e+07	1.39395e+07	1.6193e+07	1.53107e+07	1.25476e+07	0.819534
21312242	ZFP655	14	1.06929e+06	5.92259e+06	3.5213e+06	3.13461e+06	4.85331e+06	2.45202e+06	2.06532e+06	0.842294
71037397	RFX5	28	0	8.44342e+06	1.02814e+07	8.70284e+06	8.44342e+06	1.02814e+07	8.70284e+06	0.846465
37718972	SMARCC2	63	4.72401e+06	3.59171e+07	4.43325e+07	3.86156e+07	3.11931e+07	3.96085e+07	3.38916e+07	0.855664
31542626	HMBOX1	31	930490	6.34721e+07	3.61348e+07	3.25393e+07	6.25416e+07	3.52043e+07	3.16088e+07	0.897866
8393627	IRF3	8	0	1.39129e+07	1.04714e+07	9.48451e+06	1.39129e+07	1.04714e+07	9.48451e+06	0.905752
6680732	ARNTL	12	0	1.29197e+07	5.42325e+06	4.93753e+06	1.29197e+07	5.42325e+06	4.93753e+06	0.910438
166295202	HNF1A	30	0	4.79465e+07	4.11272e+07	3.84201e+07	4.79465e+07	4.11272e+07	3.84201e+07	0.934178
295844817	MITF	11	0	9.62234e+07	3.98525e+07	3.86141e+07	9.62234e+07	3.98525e+07	3.86141e+07	0.968926
134053939	TCFCP2L1	4	0	2702632	5.49713e+06	5.35838e+06	2702632	5.49713e+06	5.35838e+06	0.974759
117414176	VEZF1	4	0	9.83709e+06	1.50805e+07	1.49685e+07	9.83709e+06	1.50805e+07	1.49685e+07	0.992574
188497644	NOC3L	6	1.55144e+06	2.94653e+06	3.82071e+06	3.80521e+06	1.3951e+06	2.26927e+06	2.25377e+06	0.993171
31543224	SMAD4	4	0	3.5967e+06	892488	889281	3.5967e+06	892488	889281	0.996406
66955886	PDS5B	114	2.81825e+06	3.14088e+07	6.35316e+07	6.37911e+07	2.85905e+07	6.07133e+07	6.09728e+07	1.00427
46909571	GATA6	11	0	3.90001e+06	1.31146e+07	1.31992e+07	3.90001e+06	1.31146e+07	1.31992e+07	1.00645
8567384	PBX2	4	0	0	618335	626164	0	618335	626164	1.01266
160948575	TERF2IP	13	0	7.37871e+06	4.99834e+06	5.13799e+06	7.37871e+06	4.99834e+06	5.13799e+06	1.02794
163965422	NFIB	42	8.4675e+06	8.07723e+07	7.65264e+07	7.84421e+07	7.23048e+07	6.80589e+07	6.99746e+07	1.02815
6754836	NFIA	73	8.52186e+06	1.09741e+08	1.10412e+08	1.19328e+08	1.0122e+08	1.0189e+08	1.10806e+08	1.08751
112421097	SMARCC1	34	1.56314e+06	1.27881e+07	1.84228e+07	1.99634e+07	1.1225e+07	1.68597e+07	1.84002e+07	1.09137
82546826	FOXK1	10	0	6.77655e+06	6.40277e+06	7.12946e+06	6.77655e+06	6.40277e+06	7.12946e+06	1.1135
38348308	RYBP	6	0	1.1348e+07	1.15257e+07	1.30498e+07	1.1348e+07	1.15257e+07	1.30498e+07	1.13223
123701554	ZFP37	5	0	0	1.851e+06	2.26914e+06	0	1.851e+06	2.26914e+06	1.2259
238018071	FOXK2	4	0	0	7.13523e+06	9307548	0	7.13523e+06	9307548	1.30445
110835729	CUX1	2	0	0	730045	1.0097e+06	0	730045	1.0097e+06	1.38307
161169031	RUNX1	7	0	925512	3.29132e+08	4.84396e+08	925512	3.29132e+08	4.84396e+08	1.47174
12963705	ELF2	4	0	2.97609e+06	1.53637e+06	2.40714e+06	2.97609e+06	1.53637e+06	2.40714e+06	1.56677
33942078	ZFP184	5	0	0	1.851e+06	5.05661e+06	0	1.851e+06	5.05661e+06	2.73182
124286785	RBPJ	12	0	1.42013e+07	5.68031e+06	1.68681e+07	1.42013e+07	5.68031e+06	1.68681e+07	2.96957
7106459	CLOCK	12	483522	6.23967e+06	1.12875e+07	3.48756e+08	5.75615e+06	1.0804e+07	3.48273e+08	32.2355
218931198	TCF7L2	2	0	3.35261e+06	0	532321	3.35261e+06	0	532321	#DIV/0!
6680582	KLF3	1	0	0	0	613744	0	0	613744	#DIV/0!
224809352	ZKSCAN3	4	1.57486e+06	4.91323e+06	0	2.67086e+06	3.33837e+06	0	1.096e+06	#DIV/0!
121949821	ATF4	1	0	0	0	1.22546e+06	0	0	1.22546e+06	#DIV/0!
254675249	SMAD3	1	0	0	0	1.6724e+06	0	0	1.6724e+06	#DIV/0!
90669983	ZFP91	2	0	5.7244e+06	0	1.72928e+06	5.7244e+06	0	1.72928e+06	#DIV/0!
293629270	MYC	1	0	0	0	1.88859e+06	0	0	1.88859e+06	#DIV/0!
109627663	ZHX1	3	0	2.40514e+06	0	1.91768e+06	2.40514e+06	0	1.91768e+06	#DIV/0!
68510029	ZKSCAN1	4	0	1.84921e+06	0	2.30245e+06	1.84921e+06	0	2.30245e+06	#DIV/0!
21313424	DRAP1	1	0	0	0	6.00182e+06	0	0	6.00182e+06	#DIV/0!
112363098	PGR	1	0	0	0	6.1162e+06	0	0	6.1162e+06	#DIV/0!
61742812	CHD6	5	1.51047e+06	1.38968e+07	0	1.50683e+07	1.23864e+07	0	1.35579e+07	#DIV/0!
140969817	BPTF	1	0	0	0	4.99694e+07	0	0	4.99694e+07	#DIV/0!

## Sheet: Pck1p #3 insulin
Accession	gene symbol	TF family	Description	# Peptides	# PSMs	No Tx	D/C	D/C/I	D/C/I to D/C
90093349	ADNP	Homeobox|Zinc finger, C2H2-type|Homeodomain-like|Zinc finger, C2H2-like	activity-dependent neuroprotector homeobox protein [Mus musculus]	2	3	1.35758e+06	0	0	#DIV/0!
13385296	BZW1	eIF4-gamma/eIF5/eIF2-epsilon|Armadillo-type fold	basic leucine zipper and W2 domain-containing protein 1 [Mus musculus]	1	1	2.41883e+06	0	0	#DIV/0!
158631191	CIC	High mobility group, HMG1/HMG2|High mobility group, superfamily	protein capicua homolog isoform a [Mus musculus]	1	1	0	0	0	#DIV/0!
7106459	CLOCK	PAS|Helix-loop-helix DNA-binding domain|Helix-loop-helix DNA-binding|PAS fold-3|PAS fold|Nuclear translocator|PAC motif	circadian locomoter output cycles protein kaput [Mus musculus]	1	1	0	0	0	#DIV/0!
300192993	DNAJC1	Heat shock protein DnaJ, conserved site|SANT, DNA-binding|Heat shock protein DnaJ, N-terminal|Homeodomain-like|Myb, DNA-binding|SANT, eukarya|Heat shock protein DnaJ|Molecular chaperone, heat shock protein, Hsp40, DnaJ	dnaJ homolog subfamily C member 1 precursor [Mus musculus]	1	1	889498	0	0	#DIV/0!
83523736	E2F3	Transcription factor E2F/dimerisation partner (TDP)|Winged helix-turn-helix transcription repressor DNA-binding|E2F Family	transcription factor E2F3 [Mus musculus]	1	1	5.15809e+06	0	0	#DIV/0!
6681285	EGR1	Zinc finger, C2H2-type|Zinc finger, C2H2-type/integrase, DNA-binding|Zinc finger, C2H2-like|Protein of unknown function DUF3432|Protein of unknown function DUF3446	early growth response protein 1 [Mus musculus]	1	1	1.18482e+06	0	0	#DIV/0!
153792362	ELK4	Ets|Winged helix-turn-helix transcription repressor DNA-binding	ETS domain-containing protein Elk-4 [Mus musculus]	1	1	1.86293e+06	0	0	#DIV/0!
66793398	FOXA1	Transcription factor, fork head, conserved site|Transcription factor, fork head|Winged helix-turn-helix transcription repressor DNA-binding|Fork-head N-terminal|Forkhead box protein, C-terminal	hepatocyte nuclear factor 3-alpha [Mus musculus]	1	1	0	0	0	#DIV/0!
6754610	MAFG	Maf transcription factor|Basic-leucine zipper (bZIP) transcription factor|Eukaryotic transcription factor, Skn-1-like, DNA-binding	transcription factor MafG [Mus musculus]	3	4	0	0	0	#DIV/0!
67906168	NR2C2	Nuclear hormone receptor, ligand-binding, core|Zinc finger, nuclear hormone receptor-type|Nuclear hormone receptor, ligand-binding|Zinc finger, NHR/GATA-type|Vitamin D receptor|Steroid hormone receptor	nuclear receptor subfamily 2 group C member 2 [Mus musculus]	1	2	338572	0	0	#DIV/0!
172073164	PRDM1	SET domain|Zinc finger, C2H2-type|Zinc finger, C2H2-type/integrase, DNA-binding|Zinc finger, C2H2-like|PR-domain zinc finger protein PRDM1	PR domain zinc finger protein 1 [Mus musculus]	1	1	9.56e+06	0	0	#DIV/0!
239916007	RFX1	DNA-binding RFX|RFX1 transcription activation region|Winged helix-turn-helix transcription repressor DNA-binding	MHC class II regulatory factor RFX1 [Mus musculus]	1	1	646666	0	0	#DIV/0!
327315356	RXRB	Nuclear hormone receptor, ligand-binding, core|Zinc finger, nuclear hormone receptor-type|Nuclear hormone receptor, ligand-binding|Zinc finger, NHR/GATA-type|Retinoid X receptor|Steroid hormone receptor	retinoic acid receptor RXR-beta isoform 1 [Mus musculus]	1	1	1.3374e+06	0	0	#DIV/0!
254675249	SMAD3	SMAD domain, Dwarfin-type|MAD homology 1, Dwarfin-type|SMAD/FHA domain|MAD homology, MH1|SMAD domain-like|Dwarfin	mothers against decapentaplegic homolog 3 [Mus musculus]	5	7	1.18468e+07	0	0	#DIV/0!
65301157	SP3	Zinc finger, C2H2-type|Zinc finger, C2H2-type/integrase, DNA-binding|Zinc finger, C2H2-like	transcription factor Sp3 isoform 1 [Mus musculus]	1	2	122588	0	0	#DIV/0!
166295206	TCF12	Helix-loop-helix DNA-binding domain|Helix-loop-helix DNA-binding	transcription factor 12 isoform 1 [Mus musculus]	1	1	186533	0	0	#DIV/0!
125656178	ZFHX4	Homeobox, conserved site|Homeobox|Zinc finger, U1-type|Zinc finger, C2H2-type|Homeodomain-like|Homeodomain-related|Zinc finger, C2H2-type/integrase, DNA-binding|Zinc finger, C2H2-like	zinc finger homeobox protein 4 [Mus musculus]	6	12	0	0	0	#DIV/0!
76559897	ZFP341	Zinc finger, C2H2-type|Zinc finger, C2H2-type/integrase, DNA-binding|Zinc finger, C2H2-like	zinc finger protein 341 [Mus musculus]	1	1	0	0	0	#DIV/0!
120587007	BCL11B	Zinc finger, C2H2-type|Zinc finger, C2H2-type/integrase, DNA-binding|Zinc finger, C2H2-like	B-cell lymphoma/leukemia 11B isoform a [Mus musculus]	1	3	0	0	0	#DIV/0!
6677853	NKX1-2	Homeobox, conserved site|Homeobox|Homeodomain-like|Homeodomain-related|Homeobox, region	NK1 transcription factor-related protein 2 [Mus musculus]	1	4	0	0	0	#DIV/0!
6680512	JUNB	Basic-leucine zipper (bZIP) transcription factor|Jun-like transcription factor|Eukaryotic transcription factor, Skn-1-like, DNA-binding|bZIP transcription factor, bZIP-1|Transcription factor Jun	transcription factor jun-B [Mus musculus]	4	9	3.31033e+06	0	0	#DIV/0!
6754402	JUN	Basic-leucine zipper (bZIP) transcription factor|Jun-like transcription factor|Eukaryotic transcription factor, Skn-1-like, DNA-binding|bZIP transcription factor, bZIP-1|Transcription factor Jun|c-Jun Transcription Factor	transcription factor AP-1 [Mus musculus]	3	7	1.42445e+06	0	0	#DIV/0!
121949821	ATF4	Basic-leucine zipper (bZIP) transcription factor|bZIP transcription factor, bZIP-1	cyclic AMP-dependent transcription factor ATF-4 [Mus musculus]	2	5	454119	0	4.64495e+06	#DIV/0!
114205435	BAZ2A	AT hook, DNA-binding motif|Bromodomain, conserved site|Bromodomain|Methyl-CpG DNA binding|Zinc finger, PHD-type|DDT domain|Zinc finger, FYVE/PHD-type|DNA-binding, integrase-type|DDT domain, subgroup|DDT domain superfamily|Zinc finger, PHD-finger	bromodomain adjacent to zinc finger domain protein 2A [Mus musculus]	1	1	0	0	623936	#DIV/0!
153945880	EP400	SNF2-related|SANT, DNA-binding|DNA/RNA helicase, C-terminal|HSA|Homeodomain-like|HAS subgroup|DEAD-like helicase, N-terminal|Helicase/SANT-associated, DNA binding|Helicase, superfamily 1/2, ATP-binding domain|MYB-like	E1A-binding protein p400 isoform 1 [Mus musculus]	1	3	2.90461e+08	0	2.94154e+08	#DIV/0!
153945804	FOXA2	Transcription factor, fork head, conserved site|Transcription factor, fork head|Winged helix-turn-helix transcription repressor DNA-binding|Fork-head N-terminal|Forkhead box protein, C-terminal	hepatocyte nuclear factor 3-beta [Mus musculus]	2	4	1.85128e+06	0	5.61408e+06	#DIV/0!
82546826	FOXK1	Transcription factor, fork head, conserved site|Forkhead-associated|Transcription factor, fork head|SMAD/FHA domain	forkhead box protein K1 [Mus musculus]	2	2	0	0	5.58668e+06	#DIV/0!
238018071	FOXK2	Transcription factor, fork head, conserved site|Forkhead-associated|Transcription factor, fork head|SMAD/FHA domain	forkhead box protein K2 [Mus musculus]	1	1	0	0	327264	#DIV/0!
6754608	MAFF	Maf transcription factor|Basic-leucine zipper (bZIP) transcription factor|Eukaryotic transcription factor, Skn-1-like, DNA-binding	transcription factor MafF [Mus musculus]	3	4	0	0	7.45116e+06	#DIV/0!
188528630	RB1	Retinoblastoma-associated protein, B-box|Retinoblastoma-associated protein, A-box|Cyclin|Cyclin-like|Cyclin-related|Rb C-terminal|Retinoblastoma-associated protein	retinoblastoma-associated protein [Mus musculus]	2	2	0	0	3.29177e+06	#DIV/0!
166706891	TCF20	Zinc finger, PHD-type	transcription factor 20 isoform a [Mus musculus]	3	5	3.57627e+06	0	3.64163e+06	#DIV/0!
218931192	TCF7L2	High mobility group, HMG1/HMG2|High mobility group, superfamily|CTNNB1 binding, N-teminal	transcription factor 7-like 2 isoform 6 [Mus musculus]	1	2	1.2247e+06	0	634127	#DIV/0!
15628025	TFCP2	CP2 transcription factor|Sterile alpha motif homology	alpha-globin transcription factor CP2 [Mus musculus]	3	12	1.28442e+06	0	1.6908e+06	#DIV/0!
134053939	TFCP2L1	CP2 transcription factor|Sterile alpha motif homology	transcription factor CP2-like protein 1 [Mus musculus]	1	3	0	0	7.2636e+06	#DIV/0!
22122853	ZFP668	Zinc finger, C2H2-type|Zinc finger, C2H2-type/integrase, DNA-binding|Zinc finger, C2H2-like	zinc finger protein 668 [Mus musculus]	1	2	0	0	1.65872e+06	#DIV/0!
67846115	ZFP787	Zinc finger, C2H2-type|Zinc finger, C2H2-type/integrase, DNA-binding|Zinc finger, C2H2-like	zinc finger protein 787 [Mus musculus]	1	1	0	0	196504	#DIV/0!
90669983	ZFP91	Zinc finger, C2H2-type|Zinc finger, C2H2-like	E3 ubiquitin-protein ligase ZFP91 [Mus musculus]	1	2	1.27826e+06	0	4.13543e+06	#DIV/0!
40789094	ZHX2	Homeobox|Zinc finger, C2H2-type|Homeodomain-like|Homeodomain-related|Zinc finger, C2H2-like	zinc fingers and homeoboxes protein 2 [Mus musculus]	4	7	2.77765e+06	0	6.43657e+06	#DIV/0!
40254321	ZHX3	Homeobox|Homeodomain-like|Homeodomain-related|Zinc finger, C2H2-like	zinc fingers and homeoboxes protein 3 [Mus musculus]	1	1	0	0	387080	#DIV/0!
294979205	WIZ	Zinc finger, C2H2-type|Zinc finger, C2H2-like	protein Wiz isoform 1 [Mus musculus]	5	7	0	2.60676e+06	9.13901e+06	3.50588
140969817	BPTF	Bromodomain, conserved site|Zinc finger, PHD-type, conserved site|Bromodomain|Zinc finger, PHD-type|DDT domain|DDT domain, subgroup|DDT domain superfamily|Zinc finger, PHD-finger	nucleosome-remodeling factor subunit BPTF [Mus musculus]	4	6	809690	632860	2.0045e+06	3.16737
194328715	ZFP207	Zinc finger, C2H2-type|Zinc finger, C2H2-like	zinc finger protein 207 isoform 1 [Mus musculus]	3	15	5.14846e+07	3.80727e+07	90073025	2.36581
133904142	TERF2	SANT, DNA-binding|Homeodomain-like|Homeodomain-related|Telomere repeat-binding factor, dimerisation domain|Myb, DNA-binding|HTH transcriptional regulator, Myb-type, DNA-binding|Telomeric repeat-binding factor 1, Pin2	telomeric repeat-binding factor 2 isoform 1 [Mus musculus]	11	26	2.09518e+06	5.86534e+06	1.26772e+07	2.16138
12963557	DMAP1	SANT, DNA-binding|DNA methyltransferase 1-associated 1	DNA methyltransferase 1-associated protein 1 [Mus musculus]	6	14	950826	3.35449e+06	6.78985e+06	2.02411
133778915	HMGN5	High mobility group protein HMG14/HMG17	high mobility group nucleosome-binding domain-containing protein 5 [Mus musculus]	9	29	6.43303e+06	3.93332e+06	7.51125e+06	1.90964
38348308	RYBP	Zinc finger, RanBP2-type	RING1 and YY1-binding protein [Mus musculus]	5	13	4.59916e+06	2.9169e+06	5.52116e+06	1.89282
126352391	ZFP384	Zinc finger, C2H2-type|Zinc finger, C2H2-type/integrase, DNA-binding|Zinc finger, C2H2-like	zinc finger protein 384 isoform 1 [Mus musculus]	8	22	7.3084e+06	6.59513e+06	1.18161e+07	1.79164
110347410	CEBPD	Basic-leucine zipper (bZIP) transcription factor|Basic leucine zipper|CCAAT/enhancer-binding	CCAAT/enhancer-binding protein delta [Mus musculus]	2	5	0	4.28689e+06	6.71086e+06	1.56544
10181166	SMARCE1	High mobility group, HMG1/HMG2|High mobility group, superfamily	SWI/SNF-related matrix-associated actin-dependent regulator of chromatin subfamily E member 1 [Mus musculus]	19	107	2.8729e+07	4.03859e+07	5.904e+07	1.4619
22122757	ZFP553	Zinc finger, C2H2-type|Zinc finger, C2H2-type/integrase, DNA-binding|Zinc finger, C2H2-like	zinc finger protein 48 [Mus musculus]	4	7	3.15221e+06	5.29048e+06	7.6641e+06	1.44866
117414176	VEZF1	Zinc finger, C2H2-type|Zinc finger, C2H2-type/integrase, DNA-binding|Zinc finger, C2H2-like	vascular endothelial zinc finger 1 [Mus musculus]	2	11	8.79246e+06	8.2678e+06	1.15302e+07	1.39459
6753404	CEBPB	Basic-leucine zipper (bZIP) transcription factor|Basic leucine zipper|CCAAT/enhancer-binding	CCAAT/enhancer-binding protein beta [Mus musculus]	8	150	1.85032e+08	5.1428e+08	6.6702e+08	1.297
166235125	SMARCC2	Chromo domain|SANT, DNA-binding|BRCT|SWIRM|Homeodomain-like|Myb, DNA-binding|SANT, eukarya	SWI/SNF complex subunit SMARCC2 isoform 1 [Mus musculus]	31	132	3.0542e+07	4.5144e+07	5.79449e+07	1.28356
239835744	TFEB	Helix-loop-helix DNA-binding domain|Helix-loop-helix DNA-binding|Protein of unknown function DUF3371	transcription factor EB isoform a [Mus musculus]	12	46	3.368e+07	2.25712e+07	2.83433e+07	1.25573
46909571	GATA6	Zinc finger, GATA-type|GATA-type transcription activator, N-terminal|Zinc finger, NHR/GATA-type	transcription factor GATA-6 [Mus musculus]	5	21	1.90833e+06	1.27154e+07	1.57623e+07	1.23962
6677659	DNAJC2	Heat shock protein DnaJ, conserved site|SANT, DNA-binding|Heat shock protein DnaJ, N-terminal|Homeodomain-like|Myb, DNA-binding|SANT, eukarya|Molecular chaperone, heat shock protein, Hsp40, DnaJ	dnaJ homolog subfamily C member 2 [Mus musculus]	5	7	1.71272e+06	1.94949e+06	2.4158e+06	1.2392
262231796	ARID2	ARID/BRIGHT DNA-binding domain|DNA-binding RFX|Zinc finger, C2H2-type|Winged helix-turn-helix transcription repressor DNA-binding|Zinc finger, C2H2-like	AT rich interactive domain 2 (ARID, RFX-like) [Mus musculus]	2	2	0	1.61291e+06	1.97217e+06	1.22274
40254249	NFRKB	-	nuclear factor related to kappa-B-binding protein [Mus musculus]	5	9	2.18846e+06	2.431e+06	2.89449e+06	1.19066
164519134	GATAD2A	Zinc finger, GATA-type	transcriptional repressor p66 alpha isoform b [Mus musculus]	21	63	1.77142e+07	2.61473e+07	3.02255e+07	1.15597
124249109	ARID1A	ARID/BRIGHT DNA-binding domain|Protein of unknown function DUF3518	AT-rich interactive domain-containing protein 1A [Mus musculus]	27	72	1.39203e+07	2.1116e+07	2.4383e+07	1.15472
145553997	ARID1B	ARID/BRIGHT DNA-binding domain|Protein of unknown function DUF3518	AT rich interactive domain 1B (Swi1 like) [Mus musculus]	18	36	1.1638e+07	1.6448e+07	1.85218e+07	1.12609
262205246	TEAD1	TEA/ATTS|Transcriptional enhancer factor	transcriptional enhancer factor TEF-1 isoform 1 [Mus musculus]	10	38	3.47886e+07	4.89284e+07	5.50178e+07	1.12446
188497644	NOC3L	CCAAT-binding factor|Nucleolar complex-associated|Nucleolar complex-associated protein 3	nucleolar complex protein 3 homolog [Mus musculus]	2	5	3.35979e+06	6527238	7.32763e+06	1.12262
157384990	TFE3	Helix-loop-helix DNA-binding domain|Helix-loop-helix DNA-binding|Protein of unknown function DUF3371	transcription factor E3 isoform a [Mus musculus]	18	90	2.53715e+08	2.54906e+08	2.85773e+08	1.12109
66955886	PDS5B	AT hook, DNA-binding motif|Armadillo-type fold	sister chromatid cohesion protein PDS5 homolog B [Mus musculus]	39	130	4.02068e+07	4.57099e+07	5.07476e+07	1.11021
112421097	SMARCC1	Chromo domain|SANT, DNA-binding|BRCT|SWIRM|Homeodomain-like|Myb, DNA-binding|SANT, eukarya	SWI/SNF complex subunit SMARCC1 [Mus musculus]	22	76	2.11179e+07	2.84905e+07	3.16026e+07	1.10923
113205053	UBTF	High mobility group, HMG1/HMG2|High mobility group, superfamily	nucleolar transcription factor 1 isoform 2 [Mus musculus]	17	84	3.21894e+07	5.31356e+07	5.87078e+07	1.10487
112293262	ESRRA	Nuclear hormone receptor, ligand-binding, core|Zinc finger, nuclear hormone receptor-type|Nuclear hormone receptor, ligand-binding|Zinc finger, NHR/GATA-type|Retinoid X receptor|Steroid hormone receptor	steroid hormone receptor ERR1 [Mus musculus]	6	9	466031	2.6167e+06	2.88702e+06	1.10331
21314854	GATAD2B	Zinc finger, GATA-type	transcriptional repressor p66-beta [Mus musculus]	12	51	1.19602e+07	2.28979e+07	2.5066e+07	1.09468
166706895	TOX4	High mobility group, HMG1/HMG2, subgroup|High mobility group, HMG1/HMG2|High mobility group, superfamily	TOX high mobility group box family member 4 [Mus musculus]	9	43	3.60703e+07	5.08325e+07	5.46568e+07	1.07523
13626034	TFAP4	Helix-loop-helix DNA-binding domain|Helix-loop-helix DNA-binding	transcription factor AP-4 [Mus musculus]	6	18	1.95386e+07	3.844e+06	4.11564e+06	1.07066
51491880	MTA2	Zinc finger, GATA-type|ELM2|SANT, DNA-binding|Bromo adjacent homology (BAH) domain|SANT, eukarya	metastasis-associated protein MTA2 [Mus musculus]	21	86	2.07726e+07	3.39957e+07	3.63079e+07	1.06801
8393627	IRF3	Interferon regulatory factor, conserved site|Interferon regulatory factor|SMAD/FHA domain|Winged helix-turn-helix transcription repressor DNA-binding|SMAD domain-like|Interferon regulatory factor-3	interferon regulatory factor 3 [Mus musculus]	2	8	8.33045e+06	6.50627e+06	6.90983e+06	1.06203
226437608	GCFC1	GC-rich sequence DNA-binding factor-like	PAX3- and PAX7-binding protein 1 [Mus musculus]	11	24	1.08167e+07	1.18839e+07	1.23936e+07	1.04289
134032032	UBP1	CP2 transcription factor|Sterile alpha motif homology	upstream-binding protein 1 isoform a [Mus musculus]	10	38	2.79991e+07	3.00663e+07	3.1177e+07	1.03694
160948575	TERF2IP	Homeodomain-like|Homeodomain-related|Rap1 Myb	telomeric repeat-binding factor 2-interacting protein 1 [Mus musculus]	10	30	9.24757e+06	1.5224e+07	1.57559e+07	1.03494
46575916	HNF4A	Nuclear hormone receptor, ligand-binding, core|Zinc finger, nuclear hormone receptor-type|Nuclear hormone receptor, ligand-binding|Retinoid X receptor|Steroid hormone receptor	hepatocyte nuclear factor 4-alpha [Mus musculus]	2	6	6.47451e+06	6.11167e+06	6299851	1.03079
113205059	YBX1	Cold-shock conserved site|Cold-shock protein, DNA-binding|Cold shock protein|Nucleic acid-binding, OB-fold|Nucleic acid-binding, OB-fold-like	nuclease-sensitive element-binding protein 1 [Mus musculus]	12	162	1.2099e+08	1.51967e+08	1.56602e+08	1.0305
6756049	ZFP148	Zinc finger, C2H2-type|Zinc finger, C2H2-type/integrase, DNA-binding|Zinc finger, C2H2-like	zinc finger protein 148 [Mus musculus]	10	20	7.55386e+06	8.28947e+06	8.38749e+06	1.01182
47059495	CSDA	Cold-shock conserved site|Cold-shock protein, DNA-binding|Cold shock protein|Nucleic acid-binding, OB-fold|Nucleic acid-binding, OB-fold-like	Y-box-binding protein 3 long isoform [Mus musculus]	11	91	1.36483e+07	1.38218e+07	1.38382e+07	1.00118
94400775	RBPJ	Cell surface receptor IPT/TIG|p53-like transcription factor, DNA-binding|Immunoglobulin-like fold|Immunoglobulin E-set|Beta-trefoil|LAG1, DNA binding	recombining binding protein suppressor of hairless isoform 1 [Mus musculus]	8	28	2.18166e+07	2.93201e+07	2.92399e+07	0.997265
126517474	NFIX	CTF transcription factor/nuclear factor 1, conserved site|MAD homology 1, Dwarfin-type|CTF transcription factor/nuclear factor 1, DNA-binding domain|CTF transcription factor/nuclear factor 1|CTF transcription factor/nuclear factor 1, N-terminal	nuclear factor 1 X-type isoform 3 [Mus musculus]	12	87	7.65539e+07	8.57855e+07	8.51146e+07	0.992179
86198301	CEBPA	Basic-leucine zipper (bZIP) transcription factor|Basic leucine zipper|CCAAT/enhancer-binding	CCAAT/enhancer-binding protein alpha [Mus musculus]	4	26	5.59037e+07	4.86015e+07	4.81712e+07	0.991146
8393832	NFIL3	Basic-leucine zipper (bZIP) transcription factor|Vertebrate interleukin-3 regulated transcription factor|Basic leucine zipper|Transcription factor, basic leucine zipper, E4BP4	nuclear factor interleukin-3-regulated protein [Mus musculus]	24	102	3.28858e+07	9.0764e+07	8.97918e+07	0.989289
254553392	ZFP512	Zinc finger, C2H2-type|Zinc finger, C2H2-like	zinc finger protein 512 [Mus musculus]	18	54	1.39936e+07	2.32608e+07	2.29284e+07	0.98571
6680231	HMGB3	HMG box A DNA-binding domain, conserved site|High mobility group, HMG1/HMG2, subgroup|High mobility group, HMG1/HMG2|High mobility group, superfamily	high mobility group protein B3 [Mus musculus]	1	3	1.36642e+07	14547094	1.42114e+07	0.976924
12963705	ELF2	Ets|Winged helix-turn-helix transcription repressor DNA-binding|Transcription factor Elf-1, N-terminal	ETS-related transcription factor Elf-2 [Mus musculus]	3	6	2.0943e+06	2.80342e+06	2.73487e+06	0.975547
31044459	CTCF	Zinc finger, C2H2-type|Zinc finger, C2H2-type/integrase, DNA-binding|Zinc finger, C2H2-like	transcriptional repressor CTCF [Mus musculus]	3	9	1.25531e+07	1.17309e+07	1.13396e+07	0.966646
71834865	MYC	Helix-loop-helix DNA-binding domain|Leucine zipper, Myc|Helix-loop-helix DNA-binding|Transcription regulator Myc, N-terminal|Transcription regulator Myc	myc proto-oncogene protein isoform a [Mus musculus]	1	3	1.51299e+06	2.17858e+06	2.05615e+06	0.943806
6680241	ONECUT1	Homeobox|Homeodomain protein CUT|Homeodomain-like|Homeodomain-related	hepatocyte nuclear factor 6 [Mus musculus]	3	10	0	3.3439e+06	3.04101e+06	0.909422
283806536	MTA3	Zinc finger, GATA-type|ELM2|SANT, DNA-binding|Bromo adjacent homology (BAH) domain|Homeodomain-like|SANT, eukarya	metastasis-associated protein MTA3 isoform 1 [Mus musculus]	9	29	2.27386e+06	3.89881e+06	3.52828e+06	0.904963
22779899	CDC5L	SANT, DNA-binding|Homeodomain-like|Homeodomain-related|Myb, DNA-binding|HTH transcriptional regulator, Myb-type, DNA-binding|Myb transcription factor|Protein of unknown function DUF3351	cell division cycle 5-like protein [Mus musculus]	32	179	1.07697e+08	1.17907e+08	1.06245e+08	0.901093
196049391	TEAD3	TEA/ATTS|Transcriptional enhancer factor	transcriptional enhancer factor TEF-5 isoform 1 [Mus musculus]	7	18	613193	1.1906e+06	1.06372e+06	0.893433
111185900	HNF1B	Homeobox|Hepatocyte nuclear factor 1, beta isoform, C-terminal|Hepatocyte nuclear factor 1, N-terminal|Homeodomain-like|Lambda repressor-like, DNA-binding|Homeodomain-related	hepatocyte nuclear factor 1-beta [Mus musculus]	2	5	1.67056e+06	2.27833e+06	2.03083e+06	0.891369
119220568	ONECUT2	Homeobox|Homeodomain protein CUT|Homeodomain-like|Homeodomain-related	one cut domain family member 2 [Mus musculus]	4	15	2.96952e+07	1.41169e+07	1.25818e+07	0.89126
40254124	SMARCA5	SNF2-related|SANT, DNA-binding|DNA/RNA helicase, C-terminal|Homeodomain-like|DEAD-like helicase, N-terminal|Helicase, superfamily 1/2, ATP-binding domain|ATPase, nucleosome remodelling ISWI, HAND domain|SLIDE|SANT, eukarya	SWI/SNF-related matrix-associated actin-dependent regulator of chromatin subfamily A member 5 [Mus musculus]	42	172	6.80932e+07	8.55022e+07	7.40761e+07	0.866365
71037397	RFX5	DNA-binding RFX|Winged helix-turn-helix transcription repressor DNA-binding	DNA-binding protein Rfx5 [Mus musculus]	12	32	6.17113e+06	8.29547e+06	7.03737e+06	0.84834
21450287	CSDE1	Cold-shock conserved site|Cold-shock protein, DNA-binding|Cold shock protein|Nucleic acid-binding, OB-fold-like	cold shock domain-containing protein E1 isoform 1 [Mus musculus]	1	3	3.16119e+06	6.34919e+06	5.38156e+06	0.847598
125625318	SP2	Zinc finger, C2H2-type|Zinc finger, C2H2-type/integrase, DNA-binding|Zinc finger, C2H2-like	transcription factor Sp2 isoform 1 [Mus musculus]	3	10	2.8032e+06	3.54796e+06	2.95122e+06	0.83181
262331578	HMGA1	HMG-I/HMG-Y, DNA-binding, conserved site|AT hook, DNA-binding motif|High mobility group, HMG-I/HMG-Y|A.T hook-like	high mobility group protein HMG-I/HMG-Y isoform a [Mus musculus]	5	19	6.03796e+07	4.69298e+07	3.85674e+07	0.82181
91598896	MTA1	Zinc finger, GATA-type|ELM2|SANT, DNA-binding|Bromo adjacent homology (BAH) domain|Homeodomain-like|SANT, eukarya	metastasis-associated protein MTA1 [Mus musculus]	11	28	734658	3.10203e+06	2.5158e+06	0.811017
6754404	JUND	Basic-leucine zipper (bZIP) transcription factor|Jun-like transcription factor|Eukaryotic transcription factor, Skn-1-like, DNA-binding|bZIP transcription factor, bZIP-1|Transcription factor Jun	transcription factor jun-D [Mus musculus]	2	5	2.73275e+06	3.36703e+06	2.70918e+06	0.804622
67188876	CEBPZ	CCAAT-binding factor|Armadillo-type fold	CCAAT/enhancer-binding protein zeta [Mus musculus]	2	7	5.31887e+06	1.04293e+07	8.2955e+06	0.795401
171846256	NFIA	CTF transcription factor/nuclear factor 1, conserved site|MAD homology 1, Dwarfin-type|CTF transcription factor/nuclear factor 1, DNA-binding domain|CTF transcription factor/nuclear factor 1|CTF transcription factor/nuclear factor 1, N-terminal	nuclear factor 1 A-type isoform 1 [Mus musculus]	13	93	5.11356e+07	8.36939e+07	6.58195e+07	0.786431
31981130	KLF13	Zinc finger, C2H2-type|Zinc finger, C2H2-type/integrase, DNA-binding|Zinc finger, C2H2-like	Krueppel-like factor 13 [Mus musculus]	2	4	0	3.84365e+06	2.90001e+06	0.754493
61966683	CEBPG	Basic-leucine zipper (bZIP) transcription factor|Basic leucine zipper	CCAAT/enhancer-binding protein gamma [Mus musculus]	2	7	5.59457e+07	6.90533e+07	5.14354e+07	0.744865
257196177	ZNF512B	Zinc finger, C2H2-type|Zinc finger, C2H2-like	zinc finger protein 512B [Mus musculus]	2	3	0	4.04456e+06	2.90959e+06	0.719384
161353485	ZFP187	Transcription regulator SCAN|Zinc finger, C2H2-type|Zinc finger, C2H2-type/integrase, DNA-binding|Zinc finger, C2H2-like	zinc finger and SCAN domain-containing protein 26 [Mus musculus]	2	6	2.73439e+06	4.32276e+06	3.10111e+06	0.717391
6679042	NFIC	CTF transcription factor/nuclear factor 1, conserved site|MAD homology 1, Dwarfin-type|CTF transcription factor/nuclear factor 1, DNA-binding domain|CTF transcription factor/nuclear factor 1|CTF transcription factor/nuclear factor 1, N-terminal	nuclear factor 1 C-type isoform a [Mus musculus]	15	94	1.03398e+08	1.60717e+08	1.15177e+08	0.716648
163965420	NFIB	CTF transcription factor/nuclear factor 1, conserved site|MAD homology 1, Dwarfin-type|CTF transcription factor/nuclear factor 1, DNA-binding domain|CTF transcription factor/nuclear factor 1|CTF transcription factor/nuclear factor 1, N-terminal	nuclear factor 1 B-type isoform 1 [Mus musculus]	14	71	4.29178e+07	5.86558e+07	4.18456e+07	0.71341
166295202	HNF1A	Homeobox|Hepatocyte nuclear factor 1, beta isoform, C-terminal|Hepatocyte nuclear factor 1, alpha isoform C-terminal|Hepatocyte nuclear factor 1, N-terminal|Homeodomain-like|Lambda repressor-like, DNA-binding|Homeodomain-related	hepatocyte nuclear factor 1-alpha [Mus musculus]	11	29	1.5204e+07	1.63551e+07	1.08468e+07	0.663206
41406074	HMGN1	High mobility group protein HMG14/HMG17	non-histone chromosomal protein HMG-14 [Mus musculus]	3	12	4.04206e+07	4.38125e+07	2.83583e+07	0.647266
158508460	AHCTF1	AT hook, DNA-binding motif	protein ELYS [Mus musculus]	69	343	1.00749e+08	2.09353e+08	1.34442e+08	0.642178
6678303	TFAM	High mobility group, HMG1/HMG2|High mobility group, superfamily	transcription factor A, mitochondrial precursor [Mus musculus]	10	91	2.59686e+08	3.71284e+08	2.32016e+08	0.624902
31542626	HMBOX1	Homeobox|Hepatocyte nuclear factor 1, N-terminal|Homeodomain-like|Lambda repressor-like, DNA-binding|Homeodomain-related	homeobox-containing protein 1 [Mus musculus]	10	25	5.01263e+07	2.49102e+07	1.53809e+07	0.617456
159032064	SALL1	Zinc finger, C2H2-type|Zinc finger, C2H2-type/integrase, DNA-binding|Zinc finger, C2H2-like	sal-like protein 1 [Mus musculus]	5	8	4.94253e+06	2.22935e+06	1.35324e+06	0.607011
110225364	ZFHX3	Homeobox, conserved site|Homeobox|Zinc finger, U1-type|Zinc finger, C2H2-type|Homeodomain-like|Homeodomain-related|Zinc finger, C2H2-type/integrase, DNA-binding|Zinc finger, C2H2-like	zinc finger homeobox protein 3 [Mus musculus]	29	63	1.90969e+07	2.80963e+07	1.67861e+07	0.597449
26787989	MRPL28	p53-like transcription factor, DNA-binding	39S ribosomal protein L28, mitochondrial [Mus musculus]	3	7	6.25808e+06	8.04729e+06	4.74265e+06	0.589348
14010847	NR5A2	Nuclear hormone receptor, ligand-binding, core|Zinc finger, nuclear hormone receptor-type|Nuclear hormone receptor, ligand-binding|Zinc finger, NHR/GATA-type|Vitamin D receptor|Steroid hormone receptor|Orphan nuclear receptor Fushi-tarazu factor 1	nuclear receptor subfamily 5 group A member 2 isoform 1 [Mus musculus]	2	4	7.44041e+06	6.90886e+06	4.05741e+06	0.587276
161169027	RUNX1	p53-like transcription factor, DNA-binding|p53/RUNT-type transcription factor, DNA-binding domain|Acute myeloid leukemia 1 (AML 1)/Runt|Runx inhibition|Acute myeloid leukemia 1 protein (AML 1)/Runt|Transcription factor, Runt-related, RUNX	runt-related transcription factor 1 isoform 1 [Mus musculus]	5	9	4.85469e+06	1.32782e+06	768976	0.579128
209862973	SSRP1	High mobility group, HMG1/HMG2|High mobility group, superfamily|Structure-specific recognition protein	FACT complex subunit SSRP1 [Mus musculus]	6	9	3.00074e+06	7.3539e+06	4.23773e+06	0.576256
6680732	ARNTL	PAS|Helix-loop-helix DNA-binding domain|Helix-loop-helix DNA-binding|PAS fold-3|PAS fold|Nuclear translocator|PAC motif	aryl hydrocarbon receptor nuclear translocator-like protein 1 isoform 1 [Mus musculus]	5	9	2.70785e+06	3.89528e+06	2.23988e+06	0.575023
21312242	ZFP655	Zinc finger, C2H2-type|Zinc finger, C2H2-type/integrase, DNA-binding|Zinc finger, C2H2-like	zinc finger protein 655 isoform a [Mus musculus]	1	3	0	2.08029e+06	1.17976e+06	0.567115
33859684	KIN	Zinc finger, C2H2-like|DNA/RNA-binding protein Kin17, conserved region	DNA/RNA-binding protein KIN17 [Mus musculus]	4	6	2.53935e+06	3.99305e+06	2.22267e+06	0.556635
46909569	GATA4	Zinc finger, GATA-type|GATA-type transcription activator, N-terminal|Zinc finger, NHR/GATA-type|Transcription factor GATA-4/5/6	transcription factor GATA-4 [Mus musculus]	5	26	3.1722e+07	3.38046e+07	1.73901e+07	0.51443
21313424	DRAP1	Transcription factor CBF/NF-Y/archaeal histone|Histone-fold	dr1-associated corepressor [Mus musculus]	2	7	9.42565e+06	9.27764e+06	4.52819e+06	0.488076
257196201	ZBTB20	BTB/POZ-like|Zinc finger, C2H2-type|BTB/POZ fold|BTB/POZ|Zinc finger, C2H2-type/integrase, DNA-binding|Zinc finger, C2H2-like	zinc finger and BTB domain-containing protein 20 isoform L [Mus musculus]	15	53	2.63607e+07	5.10432e+07	2.4881e+07	0.487451
19745144	CREB1	Coactivator CBP, pKID|Basic-leucine zipper (bZIP) transcription factor|bZIP transcription factor, bZIP-1|cAMP response element binding (CREB) protein	cyclic AMP-responsive element-binding protein 1 isoform B [Mus musculus]	3	6	6.02982e+06	5.46317e+06	2.64202e+06	0.483607
120300925	HOXB3	Homeobox protein, antennapedia type, conserved site|Homeobox, conserved site|Homeobox|Homeodomain-like|Homeodomain-related|Homeobox, region	homeobox protein Hox-B3 [Mus musculus]	1	3	5.41128e+06	4.32612e+06	1.87724e+06	0.433931
15022805	HMG20A	High mobility group, HMG1/HMG2|High mobility group, superfamily	high mobility group protein 20A [Mus musculus]	2	5	5.48075e+06	9.81112e+06	2.67695e+06	0.272848
74136557	ARID5B	ARID/BRIGHT DNA-binding domain	AT-rich interactive domain-containing protein 5B [Mus musculus]	2	2	0	2.51026e+06	477154	0.190081
28076891	ZFP422	Zinc finger, C2H2-type|Zinc finger, C2H2-type/integrase, DNA-binding|Zinc finger, C2H2-like	zinc finger protein 22 [Mus musculus]	2	10	1.04714e+07	1.70522e+07	2.6954e+06	0.158067
295424118	RREB1	Zinc finger, C2H2-type|Zinc finger, C2H2-type/integrase, DNA-binding|Zinc finger, C2H2-like	ras-responsive element-binding protein 1 isoform 2 [Mus musculus]	4	7	3.42326e+06	2.83773e+07	4.2878e+06	0.1511
31982421	YY1	Zinc finger, C2H2-type|Zinc finger, C2H2-type/integrase, DNA-binding|Zinc finger, C2H2-like|Transcription factor yin/yang	transcriptional repressor protein YY1 [Mus musculus]	8	31	9.99824e+07	1.2522e+08	1.52433e+07	0.121732
62177117	BAZ2B	Bromodomain, conserved site|Bromodomain|Methyl-CpG DNA binding|Zinc finger, PHD-type|DDT domain|Zinc finger, FYVE/PHD-type|DNA-binding, integrase-type|DDT domain, subgroup|DDT domain superfamily|Zinc finger, PHD-finger	bromodomain adjacent to zinc finger domain, 2B [Mus musculus]	2	3	0	1.26703e+06	0	0
134032021	ETV3	Ets|Winged helix-turn-helix transcription repressor DNA-binding	ETS translocation variant 3 [Mus musculus]	1	1	0	328898	0	0
160333168	FIZ1	Zinc finger, C2H2-type|Zinc finger, C2H2-type/integrase, DNA-binding|Zinc finger, C2H2-like	flt3-interacting zinc finger protein 1 [Mus musculus]	1	1	0	599230	0	0
37674207	GZF1	BTB/POZ-like|Zinc finger, C2H2-type|BTB/POZ fold|BTB/POZ|Zinc finger, C2H2-type/integrase, DNA-binding|Zinc finger, C2H2-like	GDNF-inducible zinc finger protein 1 [Mus musculus]	1	1	0	1.48327e+06	0	0
6680582	KLF3	Zinc finger, C2H2-type|Zinc finger, C2H2-type/integrase, DNA-binding|Zinc finger, C2H2-like	Krueppel-like factor 3 [Mus musculus]	1	1	0	4.02279e+06	0	0
6754612	MAFK	Maf transcription factor|Basic-leucine zipper (bZIP) transcription factor|Eukaryotic transcription factor, Skn-1-like, DNA-binding	transcription factor MafK [Mus musculus]	3	5	11427801	7.01367e+06	0	0
163965354	MITF	Helix-loop-helix DNA-binding domain|Helix-loop-helix DNA-binding|Protein of unknown function DUF3371	microphthalmia-associated transcription factor isoform 1 [Mus musculus]	3	18	0	5.36967e+06	0	0
114326538	NFYC	Transcription factor CBF/NF-Y/archaeal histone|Histone-fold	nuclear transcription factor Y subunit gamma isoform 1 [Mus musculus]	1	2	1.41314e+06	2.65951e+06	0	0
7657397	NR4A3	Nuclear hormone receptor, ligand-binding, core|Zinc finger, nuclear hormone receptor-type|Nuclear hormone receptor, ligand-binding|Zinc finger, NHR/GATA-type|Steroid hormone receptor|Orphan nuclear receptor|Orphan nuclear receptor, NOR1 type	nuclear receptor subfamily 4 group A member 3 [Mus musculus]	1	1	0	1.60377e+06	0	0
255982546	NRF1	Nuclear respiratory factor-1, activation binding domain|Nuclear respiratory factor 1, NLS/DNA-binding, dimerisation domain	nuclear respiratory factor 1 isoform b [Mus musculus]	1	2	1.04886e+07	7374228	0	0
119226255	SP1	Zinc finger, C2H2-type|Zinc finger, C2H2-type/integrase, DNA-binding|Zinc finger, C2H2-like	transcription factor Sp1 [Mus musculus]	1	4	0	842055	0	0
37622347	TBX3	Transcription factor, T-box, conserved site|p53-like transcription factor, DNA-binding|Transcription factor, T-box	T-box transcription factor TBX3 isoform 1 [Mus musculus]	4	5	6.29519e+07	2.18498e+06	0	0
169646141	ZBTB44	BTB/POZ-like|Zinc finger, C2H2-type|BTB/POZ fold|BTB/POZ|Zinc finger, C2H2-type/integrase, DNA-binding|Zinc finger, C2H2-like	zinc finger and BTB domain-containing protein 44 isoform a [Mus musculus]	1	1	0	792399	0	0
85701534	ZBTB45	BTB/POZ-like|Zinc finger, C2H2-type|BTB/POZ fold|BTB/POZ|Zinc finger, C2H2-type/integrase, DNA-binding|Zinc finger, C2H2-like	zinc finger and BTB domain-containing protein 45 [Mus musculus]	3	8	0	4.27171e+06	0	0
28893511	ZFP771	Zinc finger, C2H2-type|Zinc finger, C2H2-type/integrase, DNA-binding|Zinc finger, C2H2-like	zinc finger protein 771 [Mus musculus]	1	2	195814	454252	0	0
113205067	ZFX	Transcriptional activator, Zfx / Zfy domain|Zinc finger, C2H2-type|Zinc finger, C2H2-type/integrase, DNA-binding|Zinc finger, C2H2-like	zinc finger X-chromosomal protein [Mus musculus]	1	2	1.26803e+06	1.98081e+06	0	0
117647238	ZBTB7A	BTB/POZ-like|Zinc finger, C2H2-type|BTB/POZ fold|BTB/POZ|Zinc finger, C2H2-type/integrase, DNA-binding|Zinc finger, C2H2-like	zinc finger and BTB domain-containing protein 7A [Mus musculus]	1	5	1.55155e+06	1.05813e+06	0	0

## Sheet: Pck1pIRSdel
Accession	Gene	NOT_in_TF_list			Description	Σ# PSMs	NC	No Tx	Dex/cAMP	D/C/I	No Tx	Dex/cAMP	D/C/I	No Tx	Dex/cAMP	D/C/I	D/C/I to D/C
8393832	NFIL3	GeneID:4783	Mus musculus	Basic-leucine zipper (bZIP) transcription factor|Vertebrate interleukin-3 regulated transcription factor|Basic leucine zipper|Transcription factor, basic leucine zipper, E4BP4	nuclear factor interleukin-3-regulated protein [Mus musculus]	64	1.43182e+08	6.03555e+07	1.62096e+08	1.00182e+08	-8.28264e+07	1.89138e+07	-4.29999e+07	0	1.89138e+07	0	0
7305605	UBP1	GeneID:7342	Mus musculus	CP2 transcription factor|Sterile alpha motif homology	upstream-binding protein 1 isoform b [Mus musculus]	25	5.54825e+07	1.08155e+07	8.29342e+07	5.1296e+07	-4.4667e+07	2.74517e+07	-4.18647e+06	0	2.74517e+07	0	0
262205252	TEAD1	GeneID:7003	Mus musculus	TEA/ATTS|Transcriptional enhancer factor	transcriptional enhancer factor TEF-1 isoform 3 [Mus musculus]	13	1.66069e+07	0	2.63553e+07	1.56685e+07	-1.66069e+07	9.74843e+06	-938361	0	9.74843e+06	0	0
160948575	TERF2IP	GeneID:54386	Mus musculus	Homeodomain-like|Homeodomain-related|Rap1 Myb	telomeric repeat-binding factor 2-interacting protein 1 [Mus musculus]	11	7.79048e+06	3.6327e+06	1.19266e+07	5.51099e+06	-4.15778e+06	4.1361e+06	-2.27949e+06	0	4.1361e+06	0	0
12963561	KLF15	GeneID:28999	Mus musculus	Zinc finger, C2H2-type|Zinc finger, C2H2-type/integrase, DNA-binding|Zinc finger, C2H2-like	Krueppel-like factor 15 [Mus musculus]	2	0	0	1537813622	0	0	1537813622	0	0	1537813622	0	0
31981130	KLF13	GeneID:51621	Mus musculus	Zinc finger, C2H2-type|Zinc finger, C2H2-type/integrase, DNA-binding|Zinc finger, C2H2-like	Krueppel-like factor 13 [Mus musculus]	4	7.78894e+06	0	1.40785e+07	5.54375e+06	-7.78894e+06	6289586	-2.24518e+06	0	6289586	0	0
33859684	KIN	GeneID:22944	Mus musculus	Zinc finger, C2H2-like|DNA/RNA-binding protein Kin17, conserved region	DNA/RNA-binding protein KIN17 [Mus musculus]	3	8.3847e+06	0	1.67716e+07	0	-8.3847e+06	8.38691e+06	-8.3847e+06	0	8.38691e+06	0	0
238814397	BHLHA9	GeneID:727857	Mus musculus	Helix-loop-helix DNA-binding domain|Helix-loop-helix DNA-binding	class A basic helix-loop-helix protein 9 [Mus musculus]	1	0	0	3.57343e+06	0	0	3.57343e+06	0	0	3.57343e+06	0	0
6680582	KLF3	GeneID:51274	Mus musculus	Zinc finger, C2H2-type|Zinc finger, C2H2-type/integrase, DNA-binding|Zinc finger, C2H2-like	Krueppel-like factor 3 [Mus musculus]	1	0	0	978241	0	0	978241	0	0	978241	0	0
30424758	ZDHHC1	GeneID:29800	-	Zinc finger, DHHC-type	probable palmitoyltransferase ZDHHC1 [Mus musculus]	1	0	0	1.67321e+07	0	0	1.67321e+07	0	0	1.67321e+07	0	0
123703979	HDX	GeneID:139324	Mus musculus	Homeobox|Homeodomain-like	highly divergent homeobox [Mus musculus]	1	0	0	1.85807e+07	0	0	1.85807e+07	0	0	1.85807e+07	0	0
70887767	HIC2	GeneID:23119	Mus musculus	BTB/POZ-like|Zinc finger, C2H2-type|BTB/POZ fold|BTB/POZ|Zinc finger, C2H2-type/integrase, DNA-binding|Zinc finger, C2H2-like	hypermethylated in cancer 2 protein [Mus musculus]	1	0	0	7.82568e+06	0	0	7.82568e+06	0	0	7.82568e+06	0	0
240255574	CSDE1	GeneID:7812	Mus musculus	Cold-shock conserved site|Cold-shock protein, DNA-binding|Cold shock protein|Nucleic acid-binding, OB-fold-like	cold shock domain-containing protein E1 isoform 2 [Mus musculus]	1	0	0	2181403	0	0	2181403	0	0	2181403	0	0
23346597	TCFAP2D	GeneID:83741	Mus musculus	Transcription factor AP-2, C-terminal|Transcription factor AP-2	transcription factor AP-2-delta [Mus musculus]	2	0	1.73933e+07	3.47408e+07	0	1.73933e+07	3.47408e+07	0	1.73933e+07	3.47408e+07	0	0
7304901	AR	GeneID:367	Mus musculus	Nuclear hormone receptor, ligand-binding, core|Androgen receptor|Zinc finger, nuclear hormone receptor-type|Nuclear hormone receptor, ligand-binding|Zinc finger, NHR/GATA-type	androgen receptor [Mus musculus]	1	0	0	1.38175e+06	0	0	1.38175e+06	0	0	1.38175e+06	0	0
27369896	TRERF1	GeneID:55809	Mus musculus	ELM2|SANT, DNA-binding|Zinc finger, C2H2-type|Homeodomain-like|Zinc finger, C2H2-like|SANT, eukarya	transcriptional-regulating factor 1 isoform 2 [Mus musculus]	1	0	0	26459165	0	0	26459165	0	0	26459165	0	0
165377130	ZFP276	GeneID:92822	Mus musculus	Zinc finger, C2H2-type|Zinc finger, AD-type|Zinc finger, C2H2-type/integrase, DNA-binding|Zinc finger, C2H2-like	zinc finger protein 276 [Mus musculus]	1	0	0	6.18515e+06	0	0	6.18515e+06	0	0	6.18515e+06	0	0
114155153	MAZ	GeneID:4150	Mus musculus	Zinc finger, C2H2-type|Zinc finger, C2H2-type/integrase, DNA-binding|Zinc finger, C2H2-like	myc-associated zinc finger protein [Mus musculus]	3	5.05243e+06	0	3.40703e+07	7.08356e+06	-5.05243e+06	2.90179e+07	2.03113e+06	0	2.90179e+07	2.03113e+06	0.0699958
113205067	ZFX	GeneID:7543	Mus musculus	Transcriptional activator, Zfx / Zfy domain|Zinc finger, C2H2-type|Zinc finger, C2H2-type/integrase, DNA-binding|Zinc finger, C2H2-like	zinc finger X-chromosomal protein [Mus musculus]	15	3.0435e+06	0	3.04904e+07	8.79506e+06	-3.0435e+06	2.74469e+07	5.75157e+06	0	2.74469e+07	5.75157e+06	0.209552
40254353	ZFP319	GeneID:57567	Mus musculus	Zinc finger, C2H2-type|Zinc finger, C2H2-type/integrase, DNA-binding|Zinc finger, C2H2-like	zinc finger protein 319 [Mus musculus]	3	0	111726	7434608	1.71013e+06	111726	7434608	1.71013e+06	111726	7434608	1.71013e+06	0.230023
15022805	HMG20A	GeneID:10363	Mus musculus	High mobility group, HMG1/HMG2|High mobility group, superfamily	high mobility group protein 20A [Mus musculus]	10	7.11439e+06	0	5.52742e+07	2.27084e+07	-7.11439e+06	4.81598e+07	1.5594e+07	0	4.81598e+07	1.5594e+07	0.323798
162135948	ZFP160	GeneID:90338	Mus musculus	Krueppel-associated box|Zinc finger, C2H2-type|Zinc finger, C2H2-type/integrase, DNA-binding|Zinc finger, C2H2-like	zinc finger protein 160 [Mus musculus]	4	0	267879	898856	384821	267879	898856	384821	267879	898856	384821	0.428123
46909571	GATA6	GeneID:2627	Mus musculus	Zinc finger, GATA-type|GATA-type transcription activator, N-terminal|Zinc finger, NHR/GATA-type	transcription factor GATA-6 [Mus musculus]	8	0	0	1.80592e+07	9.77925e+06	0	1.80592e+07	9.77925e+06	0	1.80592e+07	9.77925e+06	0.541512
209862973	SSRP1	GeneID:6749	Mus musculus	High mobility group, HMG1/HMG2|High mobility group, superfamily|Structure-specific recognition protein	FACT complex subunit SSRP1 [Mus musculus]	28	0	0	8.23198e+07	6.27174e+07	0	8.23198e+07	6.27174e+07	0	8.23198e+07	6.27174e+07	0.761875
31981994	NOC4L	GeneID:79050	Mus musculus	CCAAT-binding factor	nucleolar complex protein 4 homolog [Mus musculus]	4	0	0	4.18669e+06	3277376	0	4.18669e+06	3277376	0	4.18669e+06	3277376	0.782808
161353485	ZFP187	GeneID:7741	Mus musculus	Transcription regulator SCAN|Zinc finger, C2H2-type|Zinc finger, C2H2-type/integrase, DNA-binding|Zinc finger, C2H2-like	zinc finger and SCAN domain-containing protein 26 [Mus musculus]	9	0	789390	1.20909e+07	9.75728e+06	789390	1.20909e+07	9.75728e+06	789390	1.20909e+07	9.75728e+06	0.806996
10181166	SMARCE1	GeneID:6605	Mus musculus	High mobility group, HMG1/HMG2|High mobility group, superfamily	SWI/SNF-related matrix-associated actin-dependent regulator of chromatin subfamily E member 1 [Mus musculus]	34	7.55928e+06	5.17875e+06	3.66706e+07	3.16227e+07	-2.38053e+06	2.91114e+07	2.40634e+07	0	2.91114e+07	2.40634e+07	0.826599
257196177	ZNF512B	GeneID:57473	Mus musculus	Zinc finger, C2H2-type|Zinc finger, C2H2-like	zinc finger protein 512B [Mus musculus]	10	1.52464e+07	0	2.79428e+07	2.58168e+07	-1.52464e+07	1.26965e+07	1.05704e+07	0	1.26965e+07	1.05704e+07	0.832546
40254124	SMARCA5	GeneID:8467	Mus musculus	SNF2-related|SANT, DNA-binding|DNA/RNA helicase, C-terminal|Homeodomain-like|DEAD-like helicase, N-terminal|Helicase, superfamily 1/2, ATP-binding domain|ATPase, nucleosome remodelling ISWI, HAND domain|SLIDE|SANT, eukarya	SWI/SNF-related matrix-associated actin-dependent regulator of chromatin subfamily A member 5 [Mus musculus]	175	1.93177e+08	5.58656e+06	2.85775e+08	2.77914e+08	-1.8759e+08	9.25986e+07	8.4737e+07	0	9.25986e+07	8.4737e+07	0.915101
6753404	CEBPB	GeneID:1051	Mus musculus	Basic-leucine zipper (bZIP) transcription factor|Basic leucine zipper|CCAAT/enhancer-binding	CCAAT/enhancer-binding protein beta [Mus musculus]	103	1.8468e+08	2.42827e+08	1.20988e+09	1.14654e+09	5.81477e+07	1.0252e+09	9.6186e+08	5.81477e+07	1.0252e+09	9.6186e+08	0.938215
254553392	ZFP512	GeneID:84450	Mus musculus	Zinc finger, C2H2-type|Zinc finger, C2H2-like	zinc finger protein 512 [Mus musculus]	78	6.39434e+07	3.8049e+07	1.405e+08	1.38734e+08	-2.58944e+07	7.65562e+07	7.4791e+07	0	7.65562e+07	7.4791e+07	0.976942
164519134	GATAD2A	GeneID:54815	Mus musculus	Zinc finger, GATA-type	transcriptional repressor p66 alpha isoform b [Mus musculus]	24	1.13659e+07	1.18883e+07	2.59534e+07	2.59624e+07	522427	1.45875e+07	1.45965e+07	522427	1.45875e+07	1.45965e+07	1.00062
188497644	NOC3L	GeneID:64318	Mus musculus	CCAAT-binding factor|Nucleolar complex-associated|Nucleolar complex-associated protein 3	nucleolar complex protein 3 homolog [Mus musculus]	43	7.25713e+06	5.1133e+06	9.422e+07	9.48515e+07	-2.14383e+06	8.69629e+07	8.75944e+07	0	8.69629e+07	8.75944e+07	1.00726
113205053	UBTF	GeneID:7343	Mus musculus	High mobility group, HMG1/HMG2|High mobility group, superfamily	nucleolar transcription factor 1 isoform 2 [Mus musculus]	108	1.27264e+08	1.80517e+07	3.51336e+08	3.67865e+08	-1.09212e+08	2.24072e+08	2.40601e+08	0	2.24072e+08	2.40601e+08	1.07377
113205057	UBTF	GeneID:7343	Mus musculus	High mobility group, HMG1/HMG2|High mobility group, superfamily	nucleolar transcription factor 1 isoform 1 [Mus musculus]	109	1.27264e+08	1.80517e+07	3.51336e+08	3.67865e+08	-1.09212e+08	2.24072e+08	2.40601e+08	0	2.24072e+08	2.40601e+08	1.07377
166706895	TOX4	GeneID:9878	Mus musculus	High mobility group, HMG1/HMG2, subgroup|High mobility group, HMG1/HMG2|High mobility group, superfamily	TOX high mobility group box family member 4 [Mus musculus]	20	3.2679e+07	0	4.82792e+07	5.02644e+07	-3.2679e+07	1.56002e+07	1.75855e+07	0	1.56002e+07	1.75855e+07	1.12726
51491880	MTA2	GeneID:9219	Mus musculus	Zinc finger, GATA-type|ELM2|SANT, DNA-binding|Bromo adjacent homology (BAH) domain|SANT, eukarya	metastasis-associated protein MTA2 [Mus musculus]	56	1.03236e+07	2.08199e+07	5.21937e+07	5.77282e+07	1.04964e+07	4.18702e+07	4.74047e+07	1.04964e+07	4.18702e+07	4.74047e+07	1.13218
22122853	ZFP668	GeneID:79759	Mus musculus	Zinc finger, C2H2-type|Zinc finger, C2H2-type/integrase, DNA-binding|Zinc finger, C2H2-like	zinc finger protein 668 [Mus musculus]	3	0	0	2.85252e+06	3.61091e+06	0	2.85252e+06	3.61091e+06	0	2.85252e+06	3.61091e+06	1.26587
22122757	ZFP553	GeneID:197407	Mus musculus	Zinc finger, C2H2-type|Zinc finger, C2H2-type/integrase, DNA-binding|Zinc finger, C2H2-like	zinc finger protein 48 [Mus musculus]	6	0	0	2.29569e+07	2.93398e+07	0	2.29569e+07	2.93398e+07	0	2.29569e+07	2.93398e+07	1.27804
91598896	MTA1	GeneID:9112	Mus musculus	Zinc finger, GATA-type|ELM2|SANT, DNA-binding|Bromo adjacent homology (BAH) domain|Homeodomain-like|SANT, eukarya	metastasis-associated protein MTA1 [Mus musculus]	11	3.99272e+06	1.26486e+07	8.98014e+06	1.04291e+07	8.65586e+06	4.98742e+06	6.43639e+06	8.65586e+06	4.98742e+06	6.43639e+06	1.29052
31982421	YY1	GeneID:7528	Mus musculus	Zinc finger, C2H2-type|Zinc finger, C2H2-type/integrase, DNA-binding|Zinc finger, C2H2-like|Transcription factor yin/yang	transcriptional repressor protein YY1 [Mus musculus]	6	6.15266e+06	0	1.36355e+07	1.60187e+07	-6.15266e+06	7482828	9.86605e+06	0	7482828	9.86605e+06	1.31849
125625320	SP2	GeneID:6668	Mus musculus	Zinc finger, C2H2-type|Zinc finger, C2H2-type/integrase, DNA-binding|Zinc finger, C2H2-like	transcription factor Sp2 isoform 2 [Mus musculus]	5	0	0	4.57507e+06	6.1072e+06	0	4.57507e+06	6.1072e+06	0	4.57507e+06	6.1072e+06	1.33489
133778915	HMGN5	GeneID:79366	Mus musculus	High mobility group protein HMG14/HMG17	high mobility group nucleosome-binding domain-containing protein 5 [Mus musculus]	8	1.37461e+06	3.99957e+06	1.16071e+07	1.51137e+07	2.62496e+06	1.02325e+07	1.37391e+07	2.62496e+06	1.02325e+07	1.37391e+07	1.34269
67188876	CEBPZ	GeneID:10153	Mus musculus	CCAAT-binding factor|Armadillo-type fold	CCAAT/enhancer-binding protein zeta [Mus musculus]	92	1.13166e+07	1.72191e+07	1.68443e+08	2.28166e+08	5.90255e+06	1.57126e+08	2.16849e+08	5.90255e+06	1.57126e+08	2.16849e+08	1.3801
21314854	GATAD2B	GeneID:57459	Mus musculus	Zinc finger, GATA-type	transcriptional repressor p66-beta [Mus musculus]	17	11457022	1.36296e+07	1.88915e+07	2.25094e+07	2.17261e+06	7.43447e+06	1.10523e+07	2.17261e+06	7.43447e+06	1.10523e+07	1.48663
133904142	TERF2	GeneID:7014	Mus musculus	SANT, DNA-binding|Homeodomain-like|Homeodomain-related|Telomere repeat-binding factor, dimerisation domain|Myb, DNA-binding|HTH transcriptional regulator, Myb-type, DNA-binding|Telomeric repeat-binding factor 1, Pin2	telomeric repeat-binding factor 2 isoform 1 [Mus musculus]	24	2.49604e+06	3.5881e+06	1.26813e+07	1.8424e+07	1.09205e+06	1.01852e+07	1.5928e+07	1.09205e+06	1.01852e+07	1.5928e+07	1.56384
74136557	ARID5B	GeneID:84159	Mus musculus	ARID/BRIGHT DNA-binding domain	AT-rich interactive domain-containing protein 5B [Mus musculus]	13	7.33131e+06	1.81562e+06	9.26164e+06	1.08493e+07	-5.51569e+06	1.93032e+06	3.51796e+06	0	1.93032e+06	3.51796e+06	1.82247
12963557	DMAP1	GeneID:55929	Mus musculus	SANT, DNA-binding|DNA methyltransferase 1-associated 1	DNA methyltransferase 1-associated protein 1 [Mus musculus]	5	0	0	4.51938e+06	8.56795e+06	0	4.51938e+06	8.56795e+06	0	4.51938e+06	8.56795e+06	1.89582
111154070	TTF1	GeneID:7270	Mus musculus	SANT, DNA-binding|MYB-like|Myb transcription factor	transcription termination factor 1 [Mus musculus]	8	0	0	1.44224e+07	2.98494e+07	0	1.44224e+07	2.98494e+07	0	1.44224e+07	2.98494e+07	2.06966
283806541	MTA3	GeneID:57504	Mus musculus	Zinc finger, GATA-type|ELM2|SANT, DNA-binding|Bromo adjacent homology (BAH) domain|Homeodomain-like|SANT, eukarya	metastasis-associated protein MTA3 isoform 4 [Mus musculus]	13	2.55667e+06	1.26486e+07	1.13259e+07	2.30603e+07	1.00919e+07	8.76924e+06	2.05037e+07	1.00919e+07	8.76924e+06	2.05037e+07	2.33813
6678305	TFDP1	GeneID:7027	Mus musculus	Transcription factor E2F/dimerisation partner (TDP)|Winged helix-turn-helix transcription repressor DNA-binding|Transcription factor DP, C-terminal|Transcription factor DP|Transcription factor DP, subgroup	transcription factor Dp-1 [Mus musculus]	3	0	0	1.27562e+06	3.72964e+06	0	1.27562e+06	3.72964e+06	0	1.27562e+06	3.72964e+06	2.92379
126352391	ZFP384	GeneID:171017	Mus musculus	Zinc finger, C2H2-type|Zinc finger, C2H2-type/integrase, DNA-binding|Zinc finger, C2H2-like	zinc finger protein 384 isoform 1 [Mus musculus]	40	2.098e+07	1.25458e+07	2.51463e+07	3.44104e+07	-8.4342e+06	4.16636e+06	1.34304e+07	0	4.16636e+06	1.34304e+07	3.22352
117647238	ZBTB7A	GeneID:51341	Mus musculus	BTB/POZ-like|Zinc finger, C2H2-type|BTB/POZ fold|BTB/POZ|Zinc finger, C2H2-type/integrase, DNA-binding|Zinc finger, C2H2-like	zinc finger and BTB domain-containing protein 7A [Mus musculus]	3	0	0	2.03659e+06	9.34207e+06	0	2.03659e+06	9.34207e+06	0	2.03659e+06	9.34207e+06	4.58711
112293262	ESRRA	GeneID:2101	Mus musculus	Nuclear hormone receptor, ligand-binding, core|Zinc finger, nuclear hormone receptor-type|Nuclear hormone receptor, ligand-binding|Zinc finger, NHR/GATA-type|Retinoid X receptor|Steroid hormone receptor	steroid hormone receptor ERR1 [Mus musculus]	3	2.44548e+06	0	2.59056e+06	4.67189e+06	-2.44548e+06	145081	2.22641e+06	0	145081	2.22641e+06	15.346
37718972	SMARCC2	GeneID:6601	Mus musculus	Chromo domain|SANT, DNA-binding|BRCT|SWIRM|Homeodomain-like|Myb, DNA-binding|SANT, eukarya	SWI/SNF complex subunit SMARCC2 isoform 3 [Mus musculus]	55	2.28933e+07	1.01897e+08	2.30822e+07	1.06392e+08	7.90033e+07	188831	8.34987e+07	7.90033e+07	188831	8.34987e+07	442.188
159032064	SALL1	GeneID:6299	Mus musculus	Zinc finger, C2H2-type|Zinc finger, C2H2-type/integrase, DNA-binding|Zinc finger, C2H2-like	sal-like protein 1 [Mus musculus]	8	2.74381e+06	1.32203e+07	0	1.6642e+07	1.04765e+07	-2.74381e+06	1.38982e+07	1.04765e+07	0	1.38982e+07	#DIV/0!
158508460	AHCTF1	GeneID:25909	Mus musculus	AT hook, DNA-binding motif	protein ELYS [Mus musculus]	421	3.26986e+08	5.83389e+08	8.69732e+07	4.83512e+08	2.56403e+08	-2.40012e+08	1.56526e+08	2.56403e+08	0	1.56526e+08	#DIV/0!
119220568	ONECUT2	GeneID:9480	Mus musculus	Homeobox|Homeodomain protein CUT|Homeodomain-like|Homeodomain-related	one cut domain family member 2 [Mus musculus]	24	9.1339e+07	5.0055e+07	2.57852e+07	7.98392e+08	-4.1284e+07	-6.55538e+07	7.07053e+08	0	0	7.07053e+08	#DIV/0!
112421097	SMARCC1	GeneID:6599	Mus musculus	Chromo domain|SANT, DNA-binding|BRCT|SWIRM|Homeodomain-like|Myb, DNA-binding|SANT, eukarya	SWI/SNF complex subunit SMARCC1 [Mus musculus]	34	2.36228e+07	5.18932e+07	20741723	7.94971e+07	2.82704e+07	-2.88107e+06	5.58743e+07	2.82704e+07	0	5.58743e+07	#DIV/0!
66955886	PDS5B	GeneID:23047	Mus musculus	AT hook, DNA-binding motif|Armadillo-type fold	sister chromatid cohesion protein PDS5 homolog B [Mus musculus]	57	3.70981e+07	6.3113e+07	0	4.92902e+07	2.60149e+07	-3.70981e+07	1.21921e+07	2.60149e+07	0	1.21921e+07	#DIV/0!
86198301	CEBPA	GeneID:1050	Mus musculus	Basic-leucine zipper (bZIP) transcription factor|Basic leucine zipper|CCAAT/enhancer-binding	CCAAT/enhancer-binding protein alpha [Mus musculus]	30	1.47248e+08	1.01042e+08	9.24122e+07	1.72621e+08	-4.62063e+07	-5.48361e+07	2.53723e+07	0	0	2.53723e+07	#DIV/0!
6754402	JUN	GeneID:3725	Mus musculus	Basic-leucine zipper (bZIP) transcription factor|Jun-like transcription factor|Eukaryotic transcription factor, Skn-1-like, DNA-binding|bZIP transcription factor, bZIP-1|Transcription factor Jun|c-Jun Transcription Factor	transcription factor AP-1 [Mus musculus]	3	6.95995e+06	0	0	8.90234e+06	-6.95995e+06	-6.95995e+06	1.94239e+06	0	0	1.94239e+06	#DIV/0!
6680241	ONECUT1	GeneID:3175	Mus musculus	Homeobox|Homeodomain protein CUT|Homeodomain-like|Homeodomain-related	hepatocyte nuclear factor 6 [Mus musculus]	13	9.13309e+07	6.29567e+07	2.57852e+07	7.9674e+08	-2.83742e+07	-6.55457e+07	7.05409e+08	0	0	7.05409e+08	#DIV/0!
124249109	ARID1A	GeneID:8289	Mus musculus	ARID/BRIGHT DNA-binding domain|Protein of unknown function DUF3518	AT-rich interactive domain-containing protein 1A [Mus musculus]	18	3.0049e+06	1.81458e+07	0	1.52232e+07	1.51409e+07	-3.0049e+06	1.22183e+07	1.51409e+07	0	1.22183e+07	#DIV/0!
145553997	ARID1B	GeneID:57492	Mus musculus	ARID/BRIGHT DNA-binding domain|Protein of unknown function DUF3518	AT rich interactive domain 1B (Swi1 like) [Mus musculus]	11	3.0049e+06	1.25087e+07	0	1.38267e+07	9.50376e+06	-3.0049e+06	1.08218e+07	9.50376e+06	0	1.08218e+07	#DIV/0!
262231796	ARID2	GeneID:196528	Mus musculus	ARID/BRIGHT DNA-binding domain|DNA-binding RFX|Zinc finger, C2H2-type|Winged helix-turn-helix transcription repressor DNA-binding|Zinc finger, C2H2-like	AT rich interactive domain 2 (ARID, RFX-like) [Mus musculus]	9	2.2797e+06	1.07425e+07	0	2864262	8.46279e+06	-2.2797e+06	584567	8.46279e+06	0	584567	#DIV/0!
166706889	TCF20	GeneID:6942	Mus musculus	Zinc finger, PHD-type	transcription factor 20 isoform b [Mus musculus]	6	1.54563e+06	4410989	0	7.38435e+06	2.86536e+06	-1.54563e+06	5.83873e+06	2.86536e+06	0	5.83873e+06	#DIV/0!
126157488	ZFP800	GeneID:168850	Mus musculus	Zinc finger, C2H2-type|Zinc finger, C2H2-like	zinc finger protein 800 [Mus musculus]	1	0	0	0	2.68398e+06	0	0	2.68398e+06	0	0	2.68398e+06	#DIV/0!
30794254	HMGXB4	GeneID:10042	Mus musculus	High mobility group, HMG1/HMG2|High mobility group, superfamily	HMG domain-containing protein 4 [Mus musculus]	1	0	0	0	1.14125e+06	0	0	1.14125e+06	0	0	1.14125e+06	#DIV/0!
124358944	ZFP827	GeneID:152485	Mus musculus	Zinc finger, C2H2-type|Zinc finger, C2H2-like	zinc finger protein 827 [Mus musculus]	1	0	0	0	3.90161e+08	0	0	3.90161e+08	0	0	3.90161e+08	#DIV/0!
6677853	NKX1-2	GeneID:390010	Mus musculus	Homeobox, conserved site|Homeobox|Homeodomain-like|Homeodomain-related|Homeobox, region	NK1 transcription factor-related protein 2 [Mus musculus]	1	0	0	0	5.49109e+07	0	0	5.49109e+07	0	0	5.49109e+07	#DIV/0!
6753172	BCL6	GeneID:604	Mus musculus	BTB/POZ-like|Zinc finger, C2H2-type|BTB/POZ fold|BTB/POZ|Zinc finger, C2H2-type/integrase, DNA-binding|Zinc finger, C2H2-like	B-cell lymphoma 6 protein homolog [Mus musculus]	1	0	0	0	9.1746e+07	0	0	9.1746e+07	0	0	9.1746e+07	#DIV/0!
6677659	DNAJC2	GeneID:27000	Mus musculus	Heat shock protein DnaJ, conserved site|SANT, DNA-binding|Heat shock protein DnaJ, N-terminal|Homeodomain-like|Myb, DNA-binding|SANT, eukarya|Molecular chaperone, heat shock protein, Hsp40, DnaJ	dnaJ homolog subfamily C member 2 [Mus musculus]	1	0	0	0	2.88439e+06	0	0	2.88439e+06	0	0	2.88439e+06	#DIV/0!
37674207	GZF1	GeneID:64412	Mus musculus	BTB/POZ-like|Zinc finger, C2H2-type|BTB/POZ fold|BTB/POZ|Zinc finger, C2H2-type/integrase, DNA-binding|Zinc finger, C2H2-like	GDNF-inducible zinc finger protein 1 [Mus musculus]	2	0	0	0	3.23102e+06	0	0	3.23102e+06	0	0	3.23102e+06	#DIV/0!
31542346	CBX2	GeneID:84733	Mus musculus	AT hook, DNA-binding motif|Chromo domain|Chromo domain-like	chromobox protein homolog 2 [Mus musculus]	1	0	0	0	1.18669e+06	0	0	1.18669e+06	0	0	1.18669e+06	#DIV/0!
238018071	FOXK2	GeneID:3607	Mus musculus	Transcription factor, fork head, conserved site|Forkhead-associated|Transcription factor, fork head|SMAD/FHA domain	forkhead box protein K2 [Mus musculus]	1	0	0	0	7.79967e+06	0	0	7.79967e+06	0	0	7.79967e+06	#DIV/0!
113205059	YBX1	GeneID:4904	Mus musculus	Cold-shock conserved site|Cold-shock protein, DNA-binding|Cold shock protein|Nucleic acid-binding, OB-fold|Nucleic acid-binding, OB-fold-like	nuclease-sensitive element-binding protein 1 [Mus musculus]	54	3.32646e+08	4.26461e+07	2.59327e+08	1.15426e+08	-2.9e+08	-7.33188e+07	-2.1722e+08	0	0	0	#DIV/0!
257196203	ZBTB20	GeneID:26137	Mus musculus	BTB/POZ-like|Zinc finger, C2H2-type|BTB/POZ fold|BTB/POZ|Zinc finger, C2H2-type/integrase, DNA-binding|Zinc finger, C2H2-like	zinc finger and BTB domain-containing protein 20 isoform S [Mus musculus]	210	9.44513e+08	2.33391e+08	4.21208e+08	6.12281e+08	-7.11122e+08	-5.23305e+08	-3.32232e+08	0	0	0	#DIV/0!
126517487	NFIX	GeneID:4784	Mus musculus	CTF transcription factor/nuclear factor 1, conserved site|MAD homology 1, Dwarfin-type|CTF transcription factor/nuclear factor 1, DNA-binding domain|CTF transcription factor/nuclear factor 1|CTF transcription factor/nuclear factor 1, N-terminal	nuclear factor 1 X-type isoform 1 [Mus musculus]	78	2.42342e+08	4.99459e+07	1.72221e+08	1.56966e+08	-1.92396e+08	-7.01209e+07	-8.53761e+07	0	0	0	#DIV/0!
22779899	CDC5L	GeneID:988	Mus musculus	SANT, DNA-binding|Homeodomain-like|Homeodomain-related|Myb, DNA-binding|HTH transcriptional regulator, Myb-type, DNA-binding|Myb transcription factor|Protein of unknown function DUF3351	cell division cycle 5-like protein [Mus musculus]	130	3.00045e+08	1.24931e+06	2.81308e+08	2.1067e+08	-2.98796e+08	-1.87371e+07	-8.93752e+07	0	0	0	#DIV/0!
84370351	NFIC	GeneID:4782	Mus musculus	CTF transcription factor/nuclear factor 1, conserved site|MAD homology 1, Dwarfin-type|CTF transcription factor/nuclear factor 1, DNA-binding domain|CTF transcription factor/nuclear factor 1|CTF transcription factor/nuclear factor 1, N-terminal	nuclear factor 1 C-type isoform b [Mus musculus]	86	3.01475e+08	9.91834e+07	1.5072e+08	3.2008e+09	-2.02292e+08	-1.50755e+08	2.89932e+09	0	0	0	#DIV/0!
126517474	NFIX	GeneID:4784	Mus musculus	CTF transcription factor/nuclear factor 1, conserved site|MAD homology 1, Dwarfin-type|CTF transcription factor/nuclear factor 1, DNA-binding domain|CTF transcription factor/nuclear factor 1|CTF transcription factor/nuclear factor 1, N-terminal	nuclear factor 1 X-type isoform 3 [Mus musculus]	85	2.42629e+08	5.0004e+07	1.72221e+08	1.56966e+08	-1.92625e+08	-7.04078e+07	-8.5663e+07	0	0	0	#DIV/0!
6754836	NFIA	GeneID:4774	Mus musculus	CTF transcription factor/nuclear factor 1, conserved site|MAD homology 1, Dwarfin-type|CTF transcription factor/nuclear factor 1, DNA-binding domain|CTF transcription factor/nuclear factor 1|CTF transcription factor/nuclear factor 1, N-terminal	nuclear factor 1 A-type isoform 2 [Mus musculus]	72	2.9757e+08	6.50651e+07	1.38005e+08	1.26798e+08	-2.32505e+08	-1.59566e+08	-1.70772e+08	0	0	0	#DIV/0!
6678303	TFAM	GeneID:7019	Homo sapiens	High mobility group, HMG1/HMG2|High mobility group, superfamily	transcription factor A, mitochondrial precursor [Mus musculus]	47	3.07256e+08	6.8232e+08	86859626	1.44142e+08	3.75064e+08	-2.20397e+08	-1.63114e+08	3.75064e+08	0	0	#DIV/0!
31542626	HMBOX1	GeneID:79618	Mus musculus	Homeobox|Hepatocyte nuclear factor 1, N-terminal|Homeodomain-like|Lambda repressor-like, DNA-binding|Homeodomain-related	homeobox-containing protein 1 [Mus musculus]	25	1.60085e+08	0	2.88318e+07	1.70632e+07	-1.60085e+08	-1.31253e+08	-1.43021e+08	0	0	0	#DIV/0!
163965422	NFIB	GeneID:4781	Mus musculus	CTF transcription factor/nuclear factor 1, conserved site|MAD homology 1, Dwarfin-type|CTF transcription factor/nuclear factor 1, DNA-binding domain|CTF transcription factor/nuclear factor 1|CTF transcription factor/nuclear factor 1, N-terminal	nuclear factor 1 B-type isoform 2 [Mus musculus]	58	2.77289e+08	5.25418e+07	1.44213e+08	1.32207e+08	-2.24747e+08	-1.33076e+08	-1.45082e+08	0	0	0	#DIV/0!
172073171	TBP	GeneID:6908	Mus musculus	Transcription factor TFIID, C-terminal/DNA glycosylase, N-terminal|Beta2-adaptin/TATA-box binding, C-terminal|TATA-box binding	TATA-box-binding protein [Mus musculus]	11	4.94029e+07	0	3.57554e+06	2.17362e+07	-4.94029e+07	-4.58274e+07	-2.76667e+07	0	0	0	#DIV/0!
71037397	RFX5	GeneID:5993	Mus musculus	DNA-binding RFX|Winged helix-turn-helix transcription repressor DNA-binding	DNA-binding protein Rfx5 [Mus musculus]	20	1.75797e+07	0	1.34269e+07	1.25442e+07	-1.75797e+07	-4.15275e+06	-5.03546e+06	0	0	0	#DIV/0!
46909569	GATA4	GeneID:2626	Mus musculus	Zinc finger, GATA-type|GATA-type transcription activator, N-terminal|Zinc finger, NHR/GATA-type|Transcription factor GATA-4/5/6	transcription factor GATA-4 [Mus musculus]	15	7.16179e+07	0	17384288	1.91009e+07	-7.16179e+07	-5.42336e+07	-5.2517e+07	0	0	0	#DIV/0!
6756049	ZFP148	GeneID:7707	Mus musculus	Zinc finger, C2H2-type|Zinc finger, C2H2-type/integrase, DNA-binding|Zinc finger, C2H2-like	zinc finger protein 148 [Mus musculus]	20	2.89129e+07	3.61549e+06	9.60343e+06	1.22577e+07	-2.52974e+07	-1.93095e+07	-1.66551e+07	0	0	0	#DIV/0!
28076891	ZFP422	GeneID:7570	Mus musculus	Zinc finger, C2H2-type|Zinc finger, C2H2-type/integrase, DNA-binding|Zinc finger, C2H2-like	zinc finger protein 22 [Mus musculus]	9	1.29383e+07	1.47619e+07	0	9.40951e+06	1.82355e+06	-1.29383e+07	-3.52881e+06	1.82355e+06	0	0	#DIV/0!
20806532	CSDA	GeneID:8531	Mus musculus	Cold-shock conserved site|Cold-shock protein, DNA-binding|Cold shock protein|Nucleic acid-binding, OB-fold|Nucleic acid-binding, OB-fold-like	Y-box-binding protein 3 short isoform [Mus musculus]	18	1.4235e+08	3.18186e+07	7.23616e+07	5.09133e+07	-1.10532e+08	-6.99886e+07	-9.1437e+07	0	0	0	#DIV/0!
161169031	RUNX1	GeneID:861	Homo sapiens	p53-like transcription factor, DNA-binding|p53/RUNT-type transcription factor, DNA-binding domain|Acute myeloid leukemia 1 (AML 1)/Runt|Runx inhibition|Acute myeloid leukemia 1 protein (AML 1)/Runt|Transcription factor, Runt-related, RUNX	runt-related transcription factor 1 isoform 3 [Mus musculus]	13	3.05359e+08	3.36756e+06	1.93321e+07	5.14099e+06	-3.01991e+08	-2.86027e+08	-3.00218e+08	0	0	0	#DIV/0!
226437608	GCFC1	GeneID:94104	Mus musculus	GC-rich sequence DNA-binding factor-like	PAX3- and PAX7-binding protein 1 [Mus musculus]	18	3.53877e+07	0	1.04647e+07	1.65573e+07	-3.53877e+07	-2.49231e+07	-1.88304e+07	0	0	0	#DIV/0!
13626034	TCFAP4	GeneID:7023	Mus musculus	Helix-loop-helix DNA-binding domain|Helix-loop-helix DNA-binding	transcription factor AP-4 [Mus musculus]	4	3.34107e+07	0	0	0	-3.34107e+07	-3.34107e+07	-3.34107e+07	0	0	0	#DIV/0!
85701534	ZBTB45	GeneID:84878	Mus musculus	BTB/POZ-like|Zinc finger, C2H2-type|BTB/POZ fold|BTB/POZ|Zinc finger, C2H2-type/integrase, DNA-binding|Zinc finger, C2H2-like	zinc finger and BTB domain-containing protein 45 [Mus musculus]	26	7.44733e+07	2.79149e+07	4.20431e+07	5.59399e+07	-4.65584e+07	-3.24302e+07	-1.85334e+07	0	0	0	#DIV/0!
31982405	E2F5	GeneID:1875	Mus musculus	Transcription factor E2F/dimerisation partner (TDP)|Winged helix-turn-helix transcription repressor DNA-binding|E2F Family	transcription factor E2F5 [Mus musculus]	1	1.45825e+09	0	0	0	-1.45825e+09	-1.45825e+09	-1.45825e+09	0	0	0	#DIV/0!
295844817	MITF	GeneID:4286	Mus musculus	Helix-loop-helix DNA-binding domain|Helix-loop-helix DNA-binding|Protein of unknown function DUF3371	microphthalmia-associated transcription factor isoform 3 [Mus musculus]	22	2.07955e+08	2.39921e+06	1.71442e+08	6.27735e+07	-2.05556e+08	-3.65134e+07	-1.45182e+08	0	0	0	#DIV/0!
121949821	ATF4	GeneID:468	Mus musculus	Basic-leucine zipper (bZIP) transcription factor|bZIP transcription factor, bZIP-1	cyclic AMP-dependent transcription factor ATF-4 [Mus musculus]	7	4.56652e+06	0	3.58463e+06	3.2109e+06	-4.56652e+06	-981892	-1.35561e+06	0	0	0	#DIV/0!
254675249	SMAD3	GeneID:4088	Mus musculus	SMAD domain, Dwarfin-type|MAD homology 1, Dwarfin-type|SMAD/FHA domain|MAD homology, MH1|SMAD domain-like|Dwarfin	mothers against decapentaplegic homolog 3 [Mus musculus]	5	1.08298e+07	0	3.07045e+06	0	-1.08298e+07	-7.75932e+06	-1.08298e+07	0	0	0	#DIV/0!
67906168	NR2C2	GeneID:7182	Mus musculus	Nuclear hormone receptor, ligand-binding, core|Zinc finger, nuclear hormone receptor-type|Nuclear hormone receptor, ligand-binding|Zinc finger, NHR/GATA-type|Vitamin D receptor|Steroid hormone receptor	nuclear receptor subfamily 2 group C member 2 [Mus musculus]	8	8.55356e+06	0	3.23424e+06	3.393e+06	-8.55356e+06	-5.31932e+06	-5.16056e+06	0	0	0	#DIV/0!
21312242	ZFP655	GeneID:79027	Mus musculus	Zinc finger, C2H2-type|Zinc finger, C2H2-type/integrase, DNA-binding|Zinc finger, C2H2-like	zinc finger protein 655 isoform a [Mus musculus]	15	8.02169e+06	8.39044e+06	3.33691e+06	3.19345e+06	368745	-4.68478e+06	-4.82824e+06	368745	0	0	#DIV/0!
71037381	ZBTB43	GeneID:23099	Mus musculus	BTB/POZ-like|Zinc finger, C2H2-type|BTB/POZ fold|BTB/POZ|Zinc finger, C2H2-type/integrase, DNA-binding|Zinc finger, C2H2-like	zinc finger and BTB domain-containing protein 43 isoform b [Mus musculus]	4	0	8.42305e+06	0	0	8.42305e+06	0	0	8.42305e+06	0	0	#DIV/0!
40254249	NFRKB	GeneID:4798	Mus musculus	-	nuclear factor related to kappa-B-binding protein [Mus musculus]	13	7.01285e+06	1.11151e+07	0	6.36609e+06	4.10229e+06	-7.01285e+06	-646757	4.10229e+06	0	0	#DIV/0!
31044459	CTCF	GeneID:10664	Mus musculus	Zinc finger, C2H2-type|Zinc finger, C2H2-type/integrase, DNA-binding|Zinc finger, C2H2-like	transcriptional repressor CTCF [Mus musculus]	22	5.59542e+07	6.28623e+06	2.01883e+07	4.76789e+07	-4.9668e+07	-3.57659e+07	-8.27531e+06	0	0	0	#DIV/0!
117606328	ZBTB44	GeneID:29068	Mus musculus	BTB/POZ-like|Zinc finger, C2H2-type|BTB/POZ fold|BTB/POZ|Zinc finger, C2H2-type/integrase, DNA-binding|Zinc finger, C2H2-like	zinc finger and BTB domain-containing protein 44 isoform b [Mus musculus]	8	2.01977e+07	0	608543	6.27187e+06	-2.01977e+07	-1.95892e+07	-1.39259e+07	0	0	0	#DIV/0!
6679991	GFI1B	GeneID:8328	Mus musculus	Zinc finger, C2H2-type|Zinc finger, C2H2-type/integrase, DNA-binding|Zinc finger, C2H2-like	zinc finger protein Gfi-1b isoform 1 [Mus musculus]	2	0	3.95484e+07	0	0	3.95484e+07	0	0	3.95484e+07	0	0	#DIV/0!
298676444	TADA2B	GeneID:93624	-	Zinc finger, ZZ-type|SANT, DNA-binding|Homeodomain-like|Myb, DNA-binding|SANT, eukarya|Transcriptional adaptor 2	transcriptional adaptor 2B [Mus musculus]	4	13544995	8.38683e+06	2.8593e+06	2.75396e+06	-5.15816e+06	-1.06857e+07	-1.0791e+07	0	0	0	#DIV/0!
166295202	HNF1A	GeneID:6927	Mus musculus	Homeobox|Hepatocyte nuclear factor 1, beta isoform, C-terminal|Hepatocyte nuclear factor 1, alpha isoform C-terminal|Hepatocyte nuclear factor 1, N-terminal|Homeodomain-like|Lambda repressor-like, DNA-binding|Homeodomain-related	hepatocyte nuclear factor 1-alpha [Mus musculus]	4	1.75255e+08	0	3.26991e+07	1.56339e+06	-1.75255e+08	-1.42556e+08	-1.73692e+08	0	0	0	#DIV/0!
8393627	IRF3	GeneID:3661	-	Interferon regulatory factor, conserved site|Interferon regulatory factor|SMAD/FHA domain|Winged helix-turn-helix transcription repressor DNA-binding|SMAD domain-like|Interferon regulatory factor-3	interferon regulatory factor 3 [Mus musculus]	2	0	0	0	0	0	0	0	0	0	0	#DIV/0!
10181102	EGR4	GeneID:1961	Mus musculus	Zinc finger, C2H2-type|Zinc finger, C2H2-type/integrase, DNA-binding|Zinc finger, C2H2-like	early growth response protein 4 [Mus musculus]	2	1.26495e+07	0	0	0	-1.26495e+07	-1.26495e+07	-1.26495e+07	0	0	0	#DIV/0!
170784840	KLF2	GeneID:10365	Mus musculus	Zinc finger, C2H2-type|Zinc finger, C2H2-type/integrase, DNA-binding|Zinc finger, C2H2-like	Krueppel-like factor 2 [Mus musculus]	1	0	0	0	0	0	0	0	0	0	0	#DIV/0!
6680231	HMGB3	GeneID:3149	Mus musculus	HMG box A DNA-binding domain, conserved site|High mobility group, HMG1/HMG2, subgroup|High mobility group, HMG1/HMG2|High mobility group, superfamily	high mobility group protein B3 [Mus musculus]	3	2.54659e+07	2.11114e+07	0	0	-4.35447e+06	-2.54659e+07	-2.54659e+07	0	0	0	#DIV/0!
46909563	WIZ	GeneID:58525	Mus musculus	Zinc finger, C2H2-type|Zinc finger, C2H2-like	protein Wiz isoform 2 [Mus musculus]	8	2.89784e+07	2.50552e+06	0	1.44122e+07	-2.64729e+07	-2.89784e+07	-1.45662e+07	0	0	0	#DIV/0!
6754404	JUND	GeneID:3727	Mus musculus	Basic-leucine zipper (bZIP) transcription factor|Jun-like transcription factor|Eukaryotic transcription factor, Skn-1-like, DNA-binding|bZIP transcription factor, bZIP-1|Transcription factor Jun	transcription factor jun-D [Mus musculus]	2	3.90324e+06	0	0	0	-3.90324e+06	-3.90324e+06	-3.90324e+06	0	0	0	#DIV/0!
10048414	SRF	GeneID:6722	Mus musculus	Transcription factor, MADS-box	serum response factor [Mus musculus]	1	3.7854e+06	0	0	0	-3.7854e+06	-3.7854e+06	-3.7854e+06	0	0	0	#DIV/0!
229335598	NR5A2	GeneID:2494	Mus musculus	Nuclear hormone receptor, ligand-binding, core|Zinc finger, nuclear hormone receptor-type|Nuclear hormone receptor, ligand-binding|Zinc finger, NHR/GATA-type|Vitamin D receptor|Steroid hormone receptor|Orphan nuclear receptor Fushi-tarazu factor 1	nuclear receptor subfamily 5 group A member 2 isoform 2 [Mus musculus]	7	1.63453e+07	0	6.55791e+06	3.23032e+06	-1.63453e+07	-9.78741e+06	-1.3115e+07	0	0	0	#DIV/0!
22094115	STAT3	GeneID:6774	Mus musculus	SH2 motif|p53-like transcription factor, DNA-binding|EF-hand-like domain|STAT transcription factor, DNA-binding, subdomain|STAT transcription factor, protein interaction|STAT transcription factor, all-alpha|STAT transcription factor, DNA-binding|STAT transcription factor, coiled coil|STAT transcription factor, core	signal transducer and activator of transcription 3 isoform 3 [Mus musculus]	2	1.02539e+07	1.34601e+06	0	0	-8.90785e+06	-1.02539e+07	-1.02539e+07	0	0	0	#DIV/0!
170295816	BHLHE22	GeneID:27319	Mus musculus	Helix-loop-helix DNA-binding domain|Helix-loop-helix DNA-binding	class E basic helix-loop-helix protein 22 [Mus musculus]	1	2.23567e+08	0	0	0	-2.23567e+08	-2.23567e+08	-2.23567e+08	0	0	0	#DIV/0!
117414176	VEZF1	GeneID:7716	Mus musculus	Zinc finger, C2H2-type|Zinc finger, C2H2-type/integrase, DNA-binding|Zinc finger, C2H2-like	vascular endothelial zinc finger 1 [Mus musculus]	11	2.69271e+07	6.37901e+06	2.48899e+07	7.08356e+06	-2.05481e+07	-2.0372e+06	-1.98435e+07	0	0	0	#DIV/0!
83523736	E2F3	GeneID:1871	Mus musculus	Transcription factor E2F/dimerisation partner (TDP)|Winged helix-turn-helix transcription repressor DNA-binding|E2F Family	transcription factor E2F3 [Mus musculus]	4	3.71865e+06	0	3.17143e+06	1.21715e+06	-3.71865e+06	-547213	-2.5015e+06	0	0	0	#DIV/0!
21313424	DRAP1	GeneID:10589	Mus musculus	Transcription factor CBF/NF-Y/archaeal histone|Histone-fold	dr1-associated corepressor [Mus musculus]	1	5.08488e+07	0	0	0	-5.08488e+07	-5.08488e+07	-5.08488e+07	0	0	0	#DIV/0!
31543224	SMAD4	GeneID:4089	Mus musculus	SMAD domain, Dwarfin-type|MAD homology 1, Dwarfin-type|SMAD/FHA domain|MAD homology, MH1|SMAD domain-like|Dwarfin	mothers against decapentaplegic homolog 4 [Mus musculus]	2	5.22514e+06	0	0	2.48045e+06	-5.22514e+06	-5.22514e+06	-2.74469e+06	0	0	0	#DIV/0!
7106459	CLOCK	GeneID:9575	Mus musculus	PAS|Helix-loop-helix DNA-binding domain|Helix-loop-helix DNA-binding|PAS fold-3|PAS fold|Nuclear translocator|PAC motif	circadian locomoter output cycles protein kaput [Mus musculus]	4	1.31488e+07	0	0	0	-1.31488e+07	-1.31488e+07	-1.31488e+07	0	0	0	#DIV/0!
157909833	ELK3	GeneID:2004	Mus musculus	Ets|Winged helix-turn-helix transcription repressor DNA-binding	ETS domain-containing protein Elk-3 isoform a [Mus musculus]	2	2.4975e+06	0	0	0	-2.4975e+06	-2.4975e+06	-2.4975e+06	0	0	0	#DIV/0!
171846245	NR2C1	GeneID:7181	Mus musculus	Nuclear hormone receptor, ligand-binding, core|Zinc finger, nuclear hormone receptor-type|Nuclear hormone receptor, ligand-binding|Zinc finger, NHR/GATA-type|Vitamin D receptor|Steroid hormone receptor	nuclear receptor subfamily 2 group C member 1 [Mus musculus]	3	8.17679e+06	0	3.8829e+06	0	-8.17679e+06	-4.29389e+06	-8.17679e+06	0	0	0	#DIV/0!
158341692	POU6F2	GeneID:11281	Mus musculus	POU-specific|Homeobox|Homeodomain-like|Lambda repressor-like, DNA-binding|Homeodomain-related|POU	POU domain, class 6, transcription factor 2 [Mus musculus]	1	0	7.95275e+06	0	0	7.95275e+06	0	0	7.95275e+06	0	0	#DIV/0!
46575916	HNF4A	GeneID:3172	Mus musculus	Nuclear hormone receptor, ligand-binding, core|Zinc finger, nuclear hormone receptor-type|Nuclear hormone receptor, ligand-binding|Retinoid X receptor|Steroid hormone receptor	hepatocyte nuclear factor 4-alpha [Mus musculus]	3	6.23531e+06	0	1.00927e+06	2.18787e+06	-6.23531e+06	-5.22604e+06	-4.04743e+06	0	0	0	#DIV/0!
34328151	TBR1	GeneID:10716	Mus musculus	Transcription factor, T-box, conserved site|p53-like transcription factor, DNA-binding|Transcription factor, T-box	T-box brain protein 1 [Mus musculus]	1	0	0	0	0	0	0	0	0	0	0	#DIV/0!
47059087	ZBTB7B	GeneID:51043	Mus musculus	BTB/POZ-like|Zinc finger, C2H2-type|BTB/POZ fold|BTB/POZ|Zinc finger, C2H2-type/integrase, DNA-binding|Zinc finger, C2H2-like	zinc finger and BTB domain-containing protein 7B [Mus musculus]	1	0	0	0	0	0	0	0	0	0	0	#DIV/0!
215422329	TOX	GeneID:9760	Mus musculus	High mobility group, HMG1/HMG2, subgroup|High mobility group, HMG1/HMG2|High mobility group, superfamily	thymocyte selection-associated high mobility group box protein TOX [Mus musculus]	2	2.49157e+08	0	0	0	-2.49157e+08	-2.49157e+08	-2.49157e+08	0	0	0	#DIV/0!
46877060	FOXP2	GeneID:93986	Mus musculus	Transcription factor, fork head, conserved site|Transcription factor, fork head|Winged helix-turn-helix transcription repressor DNA-binding|Zinc finger, C2H2-type/integrase, DNA-binding|Zinc finger, C2H2-like	forkhead box protein P2 [Mus musculus]	1	0	0	0	0	0	0	0	0	0	0	#DIV/0!
6680512	JUNB	GeneID:3726	Mus musculus	Basic-leucine zipper (bZIP) transcription factor|Jun-like transcription factor|Eukaryotic transcription factor, Skn-1-like, DNA-binding|bZIP transcription factor, bZIP-1|Transcription factor Jun	transcription factor jun-B [Mus musculus]	3	1.47575e+07	1.15495e+06	7.98366e+06	0	-1.36026e+07	-6.77384e+06	-1.47575e+07	0	0	0	#DIV/0!
6678557	VAX1	GeneID:11023	Mus musculus	Homeobox, conserved site|Helix-turn-helix motif, lambda-like repressor|Homeobox|Homeodomain-like|Homeodomain-related	ventral anterior homeobox 1 [Mus musculus]	1	0	0	0	0	0	0	0	0	0	0	#DIV/0!
110225364	ZFHX3	GeneID:463	Mus musculus	Homeobox, conserved site|Homeobox|Zinc finger, U1-type|Zinc finger, C2H2-type|Homeodomain-like|Homeodomain-related|Zinc finger, C2H2-type/integrase, DNA-binding|Zinc finger, C2H2-like	zinc finger homeobox protein 3 [Mus musculus]	15	7.43737e+07	7.70928e+06	0	0	-6.66644e+07	-7.43737e+07	-7.43737e+07	0	0	0	#DIV/0!
224809352	ZKSCAN3	GeneID:80317	Mus musculus	Krueppel-associated box|Transcription regulator SCAN|Zinc finger, C2H2-type|Zinc finger, C2H2-type/integrase, DNA-binding|Zinc finger, C2H2-like	zinc finger protein with KRAB and SCAN domains 3 [Mus musculus]	3	7.66036e+06	5.17718e+06	0	0	-2.48318e+06	-7.66036e+06	-7.66036e+06	0	0	0	#DIV/0!
6679711	EVX1	GeneID:2128	Mus musculus	Homeobox, conserved site|Homeobox|Homeodomain-like|Homeodomain-related|Homeobox, region	homeobox even-skipped homolog protein 1 [Mus musculus]	1	6.40949e+06	0	0	0	-6.40949e+06	-6.40949e+06	-6.40949e+06	0	0	0	#DIV/0!
119226255	SP1	GeneID:6667	Mus musculus	Zinc finger, C2H2-type|Zinc finger, C2H2-type/integrase, DNA-binding|Zinc finger, C2H2-like	transcription factor Sp1 [Mus musculus]	1	0	0	0	0	0	0	0	0	0	0	#DIV/0!
26787989	MRPL28	GeneID:10573	Mus musculus	p53-like transcription factor, DNA-binding	39S ribosomal protein L28, mitochondrial [Mus musculus]	1	5.7286e+06	0	0	0	-5.7286e+06	-5.7286e+06	-5.7286e+06	0	0	0	#DIV/0!
6678637	ZFP161	GeneID:7541	Mus musculus	BTB/POZ-like|Zinc finger, C2H2-type|BTB/POZ fold|BTB/POZ|Zinc finger, C2H2-type/integrase, DNA-binding|Zinc finger, C2H2-like	zinc finger and BTB domain-containing protein 14 [Mus musculus]	1	2.73318e+07	0	0	0	-2.73318e+07	-2.73318e+07	-2.73318e+07	0	0	0	#DIV/0!
218931186	TCF7L2	GeneID:6934	Mus musculus	High mobility group, HMG1/HMG2|High mobility group, superfamily|CTNNB1 binding, N-teminal	transcription factor 7-like 2 isoform 4 [Mus musculus]	1	6.07264e+06	0	0	0	-6.07264e+06	-6.07264e+06	-6.07264e+06	0	0	0	#DIV/0!
6678287	TERF1	GeneID:7013	Mus musculus	SANT, DNA-binding|Homeodomain-like|Homeodomain-related|Telomere repeat-binding factor, dimerisation domain|Myb, DNA-binding|HTH transcriptional regulator, Myb-type, DNA-binding|Telomeric repeat-binding factor 1, Pin2	telomeric repeat-binding factor 1 [Mus musculus]	1	0	10927561	0	0	10927561	0	0	10927561	0	0	#DIV/0!
122114637	IKZF4	GeneID:64375	Mus musculus	Zinc finger, C2H2-type|Zinc finger, C2H2-type/integrase, DNA-binding|Zinc finger, C2H2-like	zinc finger protein Eos [Mus musculus]	1	0	0	0	0	0	0	0	0	0	0	#DIV/0!
12963705	ELF2	GeneID:1998	Mus musculus	Ets|Winged helix-turn-helix transcription repressor DNA-binding|Transcription factor Elf-1, N-terminal	ETS-related transcription factor Elf-2 [Mus musculus]	1	6.73605e+08	0	0	0	-6.73605e+08	-6.73605e+08	-6.73605e+08	0	0	0	#DIV/0!
117606364	NFKB1	GeneID:4790	Mus musculus	Death|Cell surface receptor IPT/TIG|p53-like transcription factor, DNA-binding|DEATH-like|Rel homology|Immunoglobulin-like fold|Immunoglobulin E-set|Ankyrin repeat-containing domain|NF-kappa-B/Rel/dorsal|Ankyrin repeat	nuclear factor NF-kappa-B p105 subunit [Mus musculus]	2	2.80171e+07	0	0	0	-2.80171e+07	-2.80171e+07	-2.80171e+07	0	0	0	#DIV/0!
6679483	PROX1	GeneID:5629	Mus musculus	Homeodomain-like|Homeobox prospero-like	prospero homeobox protein 1 [Mus musculus]	2	4.61721e+06	0	0	0	-4.61721e+06	-4.61721e+06	-4.61721e+06	0	0	0	#DIV/0!
7657098	FOXE3	GeneID:2301	Mus musculus	Transcription factor, fork head, conserved site|Transcription factor, fork head|Winged helix-turn-helix transcription repressor DNA-binding	forkhead box protein E3 [Mus musculus]	1	9.44359e+06	0	0	0	-9.44359e+06	-9.44359e+06	-9.44359e+06	0	0	0	#DIV/0!
6754832	NFE2L2	GeneID:4780	Mus musculus	Basic-leucine zipper (bZIP) transcription factor|Eukaryotic transcription factor, Skn-1-like, DNA-binding|bZIP transcription factor, bZIP-1|Kelch related	nuclear factor erythroid 2-related factor 2 [Mus musculus]	1	2.2911e+07	0	0	0	-2.2911e+07	-2.2911e+07	-2.2911e+07	0	0	0	#DIV/0!
114205435	BAZ2A	GeneID:11176	Mus musculus	AT hook, DNA-binding motif|Bromodomain, conserved site|Bromodomain|Methyl-CpG DNA binding|Zinc finger, PHD-type|DDT domain|Zinc finger, FYVE/PHD-type|DNA-binding, integrase-type|DDT domain, subgroup|DDT domain superfamily|Zinc finger, PHD-finger	bromodomain adjacent to zinc finger domain protein 2A [Mus musculus]	3	1.32895e+06	0	0	0	-1.32895e+06	-1.32895e+06	-1.32895e+06	0	0	0	#DIV/0!
8393248	DEAF1	GeneID:10522	Mus musculus	SAND|Zinc finger, MYND-type|SAND-like	deformed epidermal autoregulatory factor 1 homolog [Mus musculus]	1	0	0	0	0	0	0	0	0	0	0	#DIV/0!
31544067	ZIK1	GeneID:284307	Mus musculus	Krueppel-associated box|Zinc finger, C2H2-type|Zinc finger, C2H2-type/integrase, DNA-binding|Zinc finger, C2H2-like	zinc finger protein interacting with ribonucleoprotein K [Mus musculus]	1	0	1.64588e+07	0	0	1.64588e+07	0	0	1.64588e+07	0	0	#DIV/0!
254675326	FEZF1	GeneID:389549	Mus musculus	Zinc finger, C2H2-type|Zinc finger, C2H2-type/integrase, DNA-binding|Zinc finger, C2H2-like	fez family zinc finger protein 1 [Mus musculus]	1	0	1.26303e+08	0	0	1.26303e+08	0	0	1.26303e+08	0	0	#DIV/0!
57242788	DZIP1	GeneID:22873	Mus musculus	Zinc finger, C2H2-type|Zinc finger, C2H2-like	zinc finger protein DZIP1 [Mus musculus]	2	0	1.26317e+06	0	0	1.26317e+06	0	0	1.26317e+06	0	0	#DIV/0!
295424113	RREB1	GeneID:6239	Mus musculus	Zinc finger, C2H2-type|Zinc finger, C2H2-type/integrase, DNA-binding|Zinc finger, C2H2-like	ras-responsive element-binding protein 1 isoform 1 [Mus musculus]	2	5.4963e+06	0	0	0	-5.4963e+06	-5.4963e+06	-5.4963e+06	0	0	0	#DIV/0!
209447068	ZFP609	GeneID:23060	Mus musculus	Zinc finger, C2H2-type|Zinc finger, C2H2-like	zinc finger protein 609 [Mus musculus]	3	8770744	2.29126e+06	0	0	-6.47948e+06	-8770744	-8770744	0	0	0	#DIV/0!
40789094	ZHX2	GeneID:22882	Mus musculus	Homeobox|Zinc finger, C2H2-type|Homeodomain-like|Homeodomain-related|Zinc finger, C2H2-like	zinc fingers and homeoboxes protein 2 [Mus musculus]	2	14303511	0	0	9448368	-14303511	-14303511	-4855143	0	0	0	#DIV/0!
37718989	GMEB2	GeneID:26205	Mus musculus	SAND|SAND-like	glucocorticoid modulatory element-binding protein 2 [Mus musculus]	1	0	4.71989e+06	0	0	4.71989e+06	0	0	4.71989e+06	0	0	#DIV/0!
90093349	ADNP	GeneID:23394	Mus musculus	Homeobox|Zinc finger, C2H2-type|Homeodomain-like|Zinc finger, C2H2-like	activity-dependent neuroprotector homeobox protein [Mus musculus]	2	2.44601e+06	1.49037e+06	0	0	-955643	-2.44601e+06	-2.44601e+06	0	0	0	#DIV/0!
124487043	ZFP777	GeneID:27153	Mus musculus	Krueppel-associated box|Zinc finger, C2H2-type|Zinc finger, C2H2-type/integrase, DNA-binding|Zinc finger, C2H2-like|Protein of unknown function DUF3669, zinc finger protein	zinc finger protein 777 [Mus musculus]	1	0	3978491	0	0	3978491	0	0	3978491	0	0	#DIV/0!
88703055	RFX7	GeneID:64864	Mus musculus	DNA-binding RFX|Winged helix-turn-helix transcription repressor DNA-binding	regulatory factor X domain containing 2 [Mus musculus]	1	523765	0	0	0	-523765	-523765	-523765	0	0	0	#DIV/0!
158631198	CIC	GeneID:23152	Mus musculus	High mobility group, HMG1/HMG2|High mobility group, superfamily	protein capicua homolog isoform b [Mus musculus]	1	2.02655e+07	0	0	0	-2.02655e+07	-2.02655e+07	-2.02655e+07	0	0	0	#DIV/0!
190194425	EP400	GeneID:57634	Mus musculus	SNF2-related|SANT, DNA-binding|DNA/RNA helicase, C-terminal|HSA|Homeodomain-like|HAS subgroup|DEAD-like helicase, N-terminal|Helicase/SANT-associated, DNA binding|Helicase, superfamily 1/2, ATP-binding domain|MYB-like	E1A-binding protein p400 isoform 2 [Mus musculus]	1	1.33729e+08	0	0	0	-1.33729e+08	-1.33729e+08	-1.33729e+08	0	0	0	#DIV/0!

## Sheet: G6pcp insulin-regulated TFs
	G6pcp common TFs enriched by insulin	Exp1	Exp2	Exp3	Common TFs enriched by insulin on G6pc >=2		Common TFs depleted by insulin	Exp1	Exp2	Exp3	Common TFs depleted by insulin on G6pc >=2
		HMGB3	ZFP512	BPTF	BPTF			DRAP1	ARNTL	ARID2	ELF1
		HMGA1	GATA4	CTCF	CTCF			ELF1	CEBPG	CREB1	HMGA1
		HMGN1	PDS5B	HNF4A	HNF4A			HMBOX1	DMAP1	FOSL2	HMGN1
		MAFK	VEZF1	NFYA	NFYA			ID1	ELF1	HMGA1	NFIA
		NFYA	BPTF	NOC3L	NOC3L			MTA1	GATAD2B	HMGN1	ONECUT2
		HNF4A	TOX4	SMAD3	SMAD3			NFIA	HMGA1	HMGN5	TCF7L2
		ONECUT1	YY1	VEZF1	VEZF1			ONECUT2	HMGN1	HNF1B	ZFP422
		ZFP187	KIN	ARID1B				RB1	IRF3	SP2
		SMAD3	CTCF	ARID5B				RBPJ	KLF12	TCF7L2
		JUN	NKX1-2	BAZ2B	7			SALL1	MTA2	TEAD3	7
		ZFP212		CEBPA				SOX4	MTA3	TFEB
		HMG20A		CEBPZ				SP1	NFIA	ZFP655
		KLF13		DRAP1				TCF7L2	NFIL3	ZHX1
		SP2		FOXA2				YY1	NFIX
		NFRKB		FOXK1				ZFHX3	ONECUT2
		WIZ		FOXK2				ZFP422	RREB1
		NOC3L		GABPA				ZFP512	SMAD3
		HOXC4		GATA6					SMARCE1
		MTA3		GATAD2A					TCF7L1
		DR1		GATAD2B					TCFCP2
		MAFF		HMBOX1					TCFCP2L1
		ZNF512B		HMG20B					TCFEB
		HMGXB3		IRF3					TERF2
				KLF3					WIZ
				MTA1					ZFP422
				RFX5					ZFP91
				SMARCA5
				SMARCE1
				SOX4
				TERF2
				UBP1
				UBTF
				ZFHX3
				ZFP384
				ZFP771
				ZFP787
				ZFP91
				ZHX2
		23	10	38				17	26	13

## Sheet: Pck1p Insulin-regulated TFs
Common TFs enriched by insulin on Pck1p	Exp1	Exp2	Exp5	Common TFs enriched by insulin on Pck1p >=2 exps			Common TFs on Pck1p depleted by insulin	Exp1	Exp2	Exp3	Common TFs depleted by insulin on Pck1p >=2 exps													Common insulin-responsive TFs on Pck1p >=2 exps	Common insulin responsive TFs on G6pcp >=2	Common TFs enriched by insulin on both promoters	Selective insulin-enriched TFs on Pck1p	Selective insulin-enriched TFs on Pck1p
	FOXK1	CLOCK	ATF4	ATF4				DRAP1	HMG20A	DRAP1	ARID5B													BPTF	BPTF	BPTF	ARID1A	CTCF
	TCF20	TCF7L2	FOXA2	FOXA2				NRF1	ZBTB44	ZBTB20	DMAP1													DRAP1	DRAP1	DRAP1	ARID5B	ELF1
	SMAD3	KLF3	FOXK1	FOXK1				TFAM	ZBTB45	HMG20A	DNAJC2													HNF4A	HNF4A	HNF4A	ATF4	GATAD2B
	KLF3	ATF4	RB1	RB1				YY1	ZBTB7A	YY1	DRAP1													SMAD3	SMAD3	SMAD3	CEBPB	HMBOX1
	CLOCK	SMAD3	TCF20	TCF20				ZBTB44	TFAM	NRF1	HMG20A													TCF7L2	TCF7L2	TCF7L2	CLOCK	HMGA1
	FOXA2	ZFP91	TCF7L2	TCF7L2				ZBTB7A	TBX3	TBX3	HMGN5													TERF2	TERF2	TERF2	DMAP1	HMGN1
	ZHX3	BPTF	ZFP91	ZFP91				DMAP1	ZBTB20	ZBTB44	MITF													WIZ	WIZ	WIZ	DNAJC2	IRF3
	RB1	ELF2	ZHX3	ZHX3				DNAJC2	NRF1	ZBTB45	MRPL28													YY1	YY1	YY1	E2F3	MTA1
	ATF4	ZFP184	WIZ	WIZ				HMGN5	ARID5B	ZBTB7A	NFYC													ZFHX3	ZFHX3	ZFHX3	ELF2	MTA3
	WIZ	RBPJ	BPTF	BPTF				MITF	DMAP1	ARID5B	NRF1													ZFP512	ZFP512	ZFP512	ESRRA	NFIA
	CEBPA	ZKSCAN3	BAZ2A	CLOCK				MRPL28	HMGN5	MITF	TBX3													ZFP91	ZFP91	ZFP91	FOXA2	NFYA
	NFIC	MYC	EP400	KLF3				TERF2	MRPL28	NFYC	TERF2													ARID1A	CTCF		FOXK1	NOC3L
	AHCTF1	ZHX1	FOXK2	SMAD3				ZFP384	ZFP512	CREB1	TFAM													ARID5B	ELF1		FOXK2	ONECUT2
	ARID1B	ZKSCAN1	MAFF					ZFP512	DNAJC2	HOXB3	YY1													ATF4	GATAD2B		GATA4	SMARCE1
	SALL1	DRAP1	TFCP2	13				BCL6	ZFP384	ZFP422	ZBTB20													CEBPB	HMBOX1		HMG20A	SOX4
	POU2F1	PGR	TFCP2L1					DNAJC1	TERF2	RREB1	ZBTB44													CLOCK	HMGA1		HMGN5	SP2
	ZFP148	CHD6	ZFP668					E2F8	NFYC	BAZ2B	ZBTB45													DMAP1	HMGN1		KLF13	VEZF1
	CDC5L		ZFP787					ELF2	WIZ	ETV3	ZBTB7A													DNAJC2	IRF3		KLF3	ZFP422
	NFIX		ZHX2					ELK4	AHR	FIZ1	ZFP384													E2F3	MTA1		MAFF
	TOX4		ZFP207					EN1	ATF1	GZF1	ZFP512													ELF2	MTA3		MITF
	ZBTB20		TERF2					FOXK2	BZW1	KLF3														ESRRA	NFIA		MRPL28
	CEBPB		DMAP1					FOXO1	CEBPZ	MAFK														FOXA2	NFYA		NFRKB
	SMARCA5		HMGN5					GATA6	CSDE1	NR4A3														FOXK1	NOC3L		NFYC
	UBTF		RYBP					GATAD2A	DZIP1	SP1														FOXK2	ONECUT2		NR5A2
	GATA4		ZFP384					GATAD2B	E2F3	ZFP771														GATA4	SMARCE1		NRF1
	VEZF1		CEBPD					HIC2	FOXO6	ZFX														HMG20A	SOX4		RB1
	ZFHX3							HMBOX1	GATA4															HMGN5	SP2		RBPJ
	SMARCC2							HMGA1	GBX2															KLF13	VEZF1		RREB1
	PDS5B							HMGB3	HNF4A															KLF3	ZFP422		RYBP
	TBX3							MAFF	JUN															MAFF			SALL1
	KLF13							MNT	JUND															MITF	29		SMARCA5
	RREB1							NR2C1	KLF13															MRPL28			SP1
	SP1							NR2C2	LMX1B															NFRKB			TADA2B
	CUX1							ONECUT2	NR3C1															NFYC			TBX3
	MAZ							RBPJ	RB1															NR5A2			TCF20
	RUNX1							RFX5	STAT3															NRF1			TCFAP4
	TADA2B							RYBP	TADA2B															RB1			TFAM
	ARID2							SMAD4	TCFAP4															RBPJ			UBTF
	RBL2							SP2	YBX1															RREB1			YBX1
	ARID5B							TCFCP2	ZFP143															RYBP			ZBTB20
	HMG20A							TCFCP2L1	ZFP161															SALL1			ZBTB44
	ADNP							UBP1	ZFP276															SMARCA5			ZBTB45
	USF1							XBP1	ZHX3															SP1			ZBTB7A
	HMG20B							YEATS4	ZNF512B															TADA2B			ZFP148
	NR5A2								MTA3															TBX3			ZFP384
	ZNF512B								MTA1															TCF20			ZHX2
	CREM								SSRP1															TCFAP4			ZHX3
	PBX2								ZFP148															TFAM			ZNF512B
	ESRRA								ESRRA															UBTF
	E2F3								TBP															YBX1
	TCFAP4								ZFHX3															ZBTB20
	TFDP1								NR5A2															ZBTB44
	CTCFL								UBTF															ZBTB45
	NFRKB								NFAT5															ZBTB7A
	HNF4A								ZHX2															ZFP148
	MIS18BP1								SMARCA5															ZFP384
	CSDA								PROX1															ZHX2
	ZFHX4								CEBPB															ZHX3
	YBX1								SALL1															ZNF512B
	ARID1A								RFX1
	TEAD1								NFRKB
	GLIS3								ARID1A
	SMARCE1
	SMARCC1
	65	17	26					44	62	26

## Sheet: Common insulin-regulated TFs
Common TFs enriched by insulin on Pck1p >=2 exps	Common TFs enriched by insulin on G6pc >=2	Common TFs enriched by insulin on both promoters	Selective insulin-enriched TFs on Pck1p	Selective insulin-enriched TFs on G6Pcp		Common TFs depleted by insulin on Pck1p >=2 exps	Common TFs depleted by insulin on G6pcp >=2	Common insulin-depleted TFs on both promoters
ATF4	BPTF	BPTF	ATF4	CTCF		ARID5B	ELF1	0
FOXA2	CTCF	SMAD3	FOXA2	HNF4A		DMAP1	HMGA1
FOXK1	HNF4A		FOXK1	NFYA		DNAJC2	HMGN1
RB1	NFYA		RB1	NOC3L		DRAP1	NFIA
TCF20	NOC3L		TCF20	VEZF1		HMG20A	ONECUT2
TCF7L2	SMAD3		TCF7L2			HMGN5	TCF7L2
ZFP91	VEZF1		ZFP91			MITF	ZFP422
ZHX3			ZHX3			MRPL28
WIZ			WIZ			NFYC
BPTF			CLOCK			NRF1
CLOCK			KLF3			TBX3
KLF3						TERF2
SMAD3						TFAM
						YY1
						ZBTB20
						ZBTB44
						ZBTB45
						ZBTB7A
						ZFP384
						ZFP512

[truncated: 1 more sheets: Pck1pIRS-insulin responsive TFs]
